# Supplementary material for: SMRT sequencing of full-length transcriptome and gene expression analysis in two chemical types of Pogostemon cablin (Blanco) Benth
Source: PeerJ. 2022 Feb 22;10:e12940. doi: 10.7717/peerj.12940 (PMC8877398; doi:10.7717/peerj.12940)
Supplement: Supplemental Information 1 [file peerj-10-12940-s001.xlsx]

## Sheet: Sheet1
File S7 The candidate DEG IDs, annotations, and the primers used for qPCR analysis
Gene ID	Annotation	Forward Primer (5’-3’)	Reverse Primer (5’-3’)
18S	18S	TCAACCATAAACGATGCCGACC	TTTCAGCCTTGCGACCATACTCC
F02_cb885_c9/f4p1/2595	DXS	GGTTCGTGAAGTTGCCAAAG	AAGAGAAGCCTGGGAATTGG
F01_cb8041_c25/f3p1/2059	DXR	GAACTTGAAGAGGCTCTGTC	CAGCCGACAATTCCAGTAAC
F01_cb9135_c2/f1p0/1313	MCT	ATGACTCTGCAAGACCTCTC	CTTTAGCAGGAACGCCTAGC
F02_cb11041_c37228/f3p0/1516	CMK	AGGGAGAGGTGAGGTAGTTG	GGATCCACACTGCTTGTTTG
F01_cb14612_c0/f1p0/864	MDS	GCCCTCATAAGGAAGCCATC	GCAGCAATGCTCCTGTTCTC
F01_cb16438_c4503/f3p3/2647	HDS	GGTTGGAAATGTGGCACTTG	TGCTCCCTGATCTGCTATTC
F01_cb16438_c45811/f3p2/1790	HDR	AAGAGGACTGGCTACCAAAG	CTTCCTCACGCTTGATATCG
F02_cb11041_c103818/f3p12/2121	PTS	TCGTCGAGGCTACGTTAAT	CCTCTTGCTTTCCCACTTTG
F01_cb3894_c37/f1p0/1842	HMGS	CATGATGGAGCAAGCAAAGG	TGAAGTGACCGCTGTCATAC
F01_cb16438_c14654/f1p1/2279	HMGR	GTGAAGTCGGTTGTGGAAGG	GCAAACCGTCTAGGGATTTC
F01_cb11528_c9/f5p0/1495	MVK	GAGCTGACACGTATCAAGAC	GGATGTCTCATTGCCCTTTC
F01_cb3740_c11/f1p0/2114	PMK	AAGCACCTCCAGCTACAATG	CAATACCTAGCAGCAGAAGC
F02_cb10536_c15/f4p2/1704	MVD	AAGGCAAGGTTCAGGAAGTG	CGGTAAGCTGAACAGCAATG
