# Supplementary material for: SMRT sequencing of full-length transcriptome and gene expression analysis in two chemical types of Pogostemon cablin (Blanco) Benth
Source: PeerJ. 2022 Feb 22;10:e12940. doi: 10.7717/peerj.12940 (PMC8877398; doi:10.7717/peerj.12940)
Supplement: Supplemental Information 2 [file peerj-10-12940-s002.xlsx]

## Sheet: File S3 Integrated_Function.ann
#GeneID	COG_class	COG_class_annotation	GO_annotation	KEGG_annotation	KEGG_pathway	KOG_class	KOG_class_annotation	Pfam_annotation	Swissprot_annotation	eggNOG_class	eggNOG_class_annotation	nr_annotation
F01_cb10534_c7/f1p1/1887	[Q]	Secondary metabolites biosynthesis, transport and catabolism	Molecular Function: oxidoreductase activity (GO:0016491);; Molecular Function: metal ion binding (GO:0046872);;	--	--	[Q]	Secondary metabolites biosynthesis, transport and catabolism	Cytochrome P450;; Cytochrome P450	Cytochrome P450 71A1 GN=CYP71A1 OS=Persea americana (Avocado) PE=1 SV=2	Q	Secondary metabolites biosynthesis, transport and catabolism	PREDICTED: cytochrome P450 71A1-like [Sesamum indicum]
F02_cb11041_c52494/f1p3/2768	[RTKL]	--	Molecular Function: protein kinase activity (GO:0004672);; Molecular Function: binding (GO:0005488);;	--	--	[T]	Signal transduction mechanisms	Protein kinase domain;; Protein tyrosine kinase;; Wall-associated receptor kinase galacturonan-binding	Probable receptor-like protein kinase At1g67000 (Precursor) GN=At1g67000 OS=Arabidopsis thaliana (Mouse-ear cress) PE=2 SV=2	T	Signal transduction mechanisms	hypothetical protein MIMGU_mgv1a021311mg, partial [Erythranthe guttata]
F01_cb14914_c24/f1p0/704	[O]	Posttranslational modification, protein turnover, chaperones	Biological Process: protein peptidyl-prolyl isomerization (GO:0000413);; Molecular Function: peptidyl-prolyl cis-trans isomerase activity (GO:0003755);; Cellular Component: plasma membrane (GO:0005886);; Biological Process: protein folding (GO:0006457);; Biological Process: response to cadmium ion (GO:0046686);; Cellular Component: apoplast (GO:0048046);;	K01802|3.15304e-76|pop:POPTR_0004s17610g|POPTRDRAFT_813818; Peptidyl-prolyl cis-trans isomerase family protein; K01802 peptidylprolyl isomerase [EC:5.2.1.8] (A)	--	[O]	Posttranslational modification, protein turnover, chaperones	Cyclophilin type peptidyl-prolyl cis-trans isomerase/CLD;; Cyclophilin type peptidyl-prolyl cis-trans isomerase/CLD	Peptidyl-prolyl cis-trans isomerase 1 {ECO:0000250|UniProtKB:O49886} OS=Glycine max (Soybean) PE=1 SV=1	O	Posttranslational modification, protein turnover, chaperones	PREDICTED: peptidyl-prolyl cis-trans isomerase 1 [Sesamum indicum]
F02_cb5383_c6/f1p0/923	--	--	Molecular Function: signal transducer activity (GO:0004871);; Cellular Component: heterotrimeric G-protein complex (GO:0005834);; Biological Process: G-protein coupled receptor signaling pathway (GO:0007186);; Biological Process: seed germination (GO:0009845);; Biological Process: basipetal auxin transport (GO:0010540);; Biological Process: protein prenylation (GO:0018342);; Biological Process: p…	--	--	--	--	GGL domain	Guanine nucleotide-binding protein subunit gamma 2 (Precursor) GN=GG2 OS=Arabidopsis thaliana (Mouse-ear cress) PE=1 SV=1	S	Function unknown	PREDICTED: guanine nucleotide-binding protein subunit gamma 2-like [Sesamum indicum]
F02_cb18202_c1/f1p0/590	[K]	Transcription	Molecular Function: RNA binding (GO:0003723);; Cellular Component: small nucleolar ribonucleoprotein complex (GO:0005732);; Biological Process: response to water deprivation (GO:0009414);; Biological Process: response to abscisic acid (GO:0009737);;	K12624|5.60931e-53|pop:POPTR_0009s07670g|SUPERSENSITIVE TO ABA AND DROUGHT family protein; K12624 U6 snRNA-associated Sm-like protein LSm5 (A)	ko03018:RNA degradation;ko03040:Spliceosome	[A]	RNA processing and modification	LSM domain	Sm-like protein LSM5 {ECO:0000305} OS=Arabidopsis thaliana (Mouse-ear cress) PE=1 SV=1	K	Transcription	PREDICTED: U6 snRNA-associated Sm-like protein LSm5 [Nelumbo nucifera]
F01_cb13074_c9/f1p0/970	--	--	--	K13464|6.45045e-48|sly:100191114|jasmonate ZIM-domain protein 3; K13464 jasmonate ZIM domain-containing protein (A)	ko04075:Plant hormone signal transduction	--	--	Divergent CCT motif	Protein TIFY 6B GN=MEB5.8 OS=Arabidopsis thaliana (Mouse-ear cress) PE=1 SV=1	S	Function unknown	PREDICTED: protein TIFY 7 [Sesamum indicum]
F02_cb3708_c2/f1p0/2559	--	--	--	--	--	--	--	Protein of unknown function (DUF616)	--	S	Function unknown	PREDICTED: uncharacterized protein LOC103493486 [Cucumis melo]
F01_cb8352_c1/f1p0/2304	[R]	General function prediction only	Molecular Function: myosin heavy chain kinase activity (GO:0016905);;	K08266|1.35864e-163|cam:101511790|protein LST8 homolog; K08266 G protein beta subunit-like (A)	--	[R]	General function prediction only	WD domain, G-beta repeat;; WD domain, G-beta repeat	Dynein assembly factor with WDR repeat domains 1 GN=DAW1 OS=Chlamydomonas reinhardtii (Chlamydomonas smithii) PE=1 SV=1	S	Function unknown	PREDICTED: protein LST8 homolog isoform X1 [Sesamum indicum]
F01_cb4336_c0/f1p0/2988	[L]	Replication, recombination and repair	Molecular Function: hydrolase activity, hydrolyzing O-glycosyl compounds (GO:0004553);; Cellular Component: vacuole (GO:0005773);; Biological Process: carbohydrate metabolic process (GO:0005975);; Cellular Component: plant-type cell wall (GO:0009505);; Cellular Component: plasmodesma (GO:0009506);; Molecular Function: cation binding (GO:0043169);; Cellular Component: anchored component of plasma …	--	--	--	--	Endonuclease V	Glucan endo-1,3-beta-glucosidase 5 (Precursor) GN=At4g31140 OS=Arabidopsis thaliana (Mouse-ear cress) PE=1 SV=1	G	Carbohydrate transport and metabolism	hypothetical protein MIMGU_mgv1a005873mg [Erythranthe guttata]
F01_cb10493_c20/f1p0/650	--	--	--	--	--	--	--	Cysteine-rich TM module stress tolerance;; XYPPX repeat (two copies)	--	--	--	--
F02_cb9478_c4/f1p0/2251	[R]	General function prediction only	--	K14407|2.69129e-144|vvi:100256296|cleavage stimulating factor 64; K14407 cleavage stimulation factor subunit 2 (A)	ko03015:mRNA surveillance pathway	[A]	RNA processing and modification	RNA recognition motif. (a.k.a. RRM, RBD, or RNP domain);; Hinge domain of cleavage stimulation factor subunit 2;; RNA recognition motif (a.k.a. RRM, RBD, or RNP domain);; RNA recognition motif. (a.k.a. RRM, RBD, or RNP domain);; Transcription termination and cleavage factor C-terminal	Cleavage stimulating factor 64 {ECO:0000303|PubMed:12379796} OS=Arabidopsis thaliana (Mouse-ear cress) PE=1 SV=1	S	Function unknown	PREDICTED: cleavage stimulating factor 64 [Sesamum indicum]
F02_cb11041_c134652/f1p0/2499	--	--	--	--	--	--	--	RNA dependent RNA polymerase;; 3C cysteine protease (picornain 3C);; Viral RNA-directed RNA-polymerase	--	--	--	--
F02_cb11756_c5/f1p0/1658	[R]	General function prediction only	Molecular Function: nucleotide binding (GO:0000166);; Biological Process: photoperiodism, flowering (GO:0048573);; Cellular Component: Cul4-RING E3 ubiquitin ligase complex (GO:0080008);;	K14962|0|cic:CICLE_v10001790mg|hypothetical protein; K14962 COMPASS component SWD2 (A)	ko03015:mRNA surveillance pathway	[ABO]	--	WD domain, G-beta repeat;; PQQ-like domain	Protein Mut11 GN=Mut11 OS=Chlamydomonas reinhardtii (Chlamydomonas smithii) PE=2 SV=1	S	Function unknown	PREDICTED: WD repeat-containing protein 82-B [Sesamum indicum]
F02_cb11041_c43392/f1p0/2701	[O]	Posttranslational modification, protein turnover, chaperones	Molecular Function: serine-type endopeptidase activity (GO:0004252);; Biological Process: proteolysis (GO:0006508);; Cellular Component: plant-type cell wall (GO:0009505);; Cellular Component: chloroplast (GO:0009507);; Biological Process: detection of external stimulus (GO:0009581);; Biological Process: detection of biotic stimulus (GO:0009595);; Cellular Component: apoplast (GO:0048046);;	--	--	--	--	Subtilase family;; Peptidase inhibitor I9;; Subtilase family	Subtilisin-like protease SBT3.3 {ECO:0000303|PubMed:16193095} (Precursor) OS=Arabidopsis thaliana (Mouse-ear cress) PE=2 SV=1	O	Posttranslational modification, protein turnover, chaperones	PREDICTED: subtilisin-like protease SBT3.5 [Sesamum indicum]
F01_cb18607_c1/f1p0/1484	--	--	Molecular Function: sequence-specific DNA binding transcription factor activity (GO:0003700);; Biological Process: regulation of transcription, DNA-templated (GO:0006355);; Cellular Component: chloroplast (GO:0009507);; Biological Process: jasmonic acid metabolic process (GO:0009694);; Biological Process: response to jasmonic acid (GO:0009753);; Biological Process: leaf morphogenesis (GO:0009965)…	--	--	--	--	--	Transcription factor TCP13 OS=Arabidopsis thaliana (Mouse-ear cress) PE=1 SV=1	K	Transcription	PREDICTED: transcription factor TCP5-like [Sesamum indicum]
F02_cb11041_c78518/f1p0/2282	[K]	Transcription	Cellular Component: nucleus (GO:0005634);; Biological Process: transcription initiation from RNA polymerase II promoter (GO:0006367);; Molecular Function: protein heterodimerization activity (GO:0046982);;	K03135|2.93131e-81|vvi:100249829|transcription initiation factor TFIID subunit 11; K03135 transcription initiation factor TFIID subunit 11 (A)	ko03022:Basal transcription factors	[K]	Transcription	hTAFII28-like protein conserved region	Transcription initiation factor TFIID subunit 11 GN=TAF11 OS=Arabidopsis thaliana (Mouse-ear cress) PE=1 SV=1	K	Transcription	PREDICTED: transcription initiation factor TFIID subunit 11 [Beta vulgaris subsp. vulgaris]
F02_cb1056_c26/f1p0/3134	--	--	--	--	--	[T]	Signal transduction mechanisms	NB-ARC domain;; AAA domain	Putative late blight resistance protein homolog R1A-6 GN=R1A-6 OS=Solanum demissum (Wild potato) PE=3 SV=2	S	Function unknown	hypothetical protein MIMGU_mgv1a000811mg [Erythranthe guttata]
F02_cb9329_c4/f1p0/2223	--	--	Cellular Component: integral component of membrane (GO:0016021);;	K13946|0|sly:100736540|LAX1 protein; K13946 auxin influx carrier (AUX1 LAX family) (A)	ko04075:Plant hormone signal transduction	[E]	Amino acid transport and metabolism	--	Auxin transporter-like protein 2 GN=LAX2 OS=Medicago truncatula (Barrel medic) PE=2 SV=1	E	Amino acid transport and metabolism	PREDICTED: auxin transporter-like protein 2 [Sesamum indicum]
F01_cb16438_c37187/f1p0/2715	[I]	Lipid transport and metabolism	Biological Process: sulfur amino acid metabolic process (GO:0000096);; Biological Process: MAPK cascade (GO:0000165);; Molecular Function: iron ion binding (GO:0005506);; Biological Process: pentose-phosphate shunt (GO:0006098);; Biological Process: regulation of translation (GO:0006417);; Biological Process: glycine catabolic process (GO:0006546);; Biological Process: protein targeting to membra…	K03526|0|gmx:100801743|4-hydroxy-3-methylbut-2-en-1-yl diphosphate synthase, chloroplastic-like; K03526 (E)-4-hydroxy-3-methylbut-2-enyl-diphosphate synthase [EC:1.17.7.1 1.17.7.3] (A)	ko00900:Terpenoid backbone biosynthesis	--	--	GcpE protein;; GcpE protein	4-hydroxy-3-methylbut-2-en-1-yl diphosphate synthase, chloroplastic (Precursor) GN=MUP24.2 OS=Arabidopsis thaliana (Mouse-ear cress) PE=1 SV=1	I	Lipid transport and metabolism	(E)-4-hydroxy-3-methylbut-2-enyl diphosphate synthase [Salvia miltiorrhiza f. alba]
F02_cb17023_c3/f1p0/924	--	--	Cellular Component: cytoskeleton (GO:0005856);; Biological Process: regulation of actin filament polymerization (GO:0030833);;	K05754|1.0137e-48|sly:101261066|actin-related protein 2/3 complex subunit 5A; K05754 actin related protein 2/3 complex, subunit 5 (A)	--	[Z]	Cytoskeleton	ARP2/3 complex 16 kDa subunit (p16-Arc)	Actin-related protein 2/3 complex subunit 5A GN=T15B16.22 OS=Arabidopsis thaliana (Mouse-ear cress) PE=1 SV=2	A	RNA processing and modification	PREDICTED: actin-related protein 2/3 complex subunit 5A [Nicotiana tomentosiformis]
F02_cb6985_c1/f1p0/2005	--	--	--	--	--	[R]	General function prediction only	Ankyrin repeat	--	S	Function unknown	hypothetical protein MIMGU_mgv1a004842mg [Erythranthe guttata]
F01_cb5522_c7/f1p0/2476	[RTKL]	--	Molecular Function: nucleotide binding (GO:0000166);; Cellular Component: membrane (GO:0016020);; Molecular Function: transferase activity, transferring phosphorus-containing groups (GO:0016772);;	--	--	--	--	Protein kinase domain;; Protein tyrosine kinase;; Leucine rich repeat;; Leucine Rich repeats (2 copies);; Leucine Rich Repeat;; Leucine rich repeat N-terminal domain	Probable inactive receptor kinase At5g58300 (Precursor) GN=At5g58300 OS=Arabidopsis thaliana (Mouse-ear cress) PE=2 SV=1	T	Signal transduction mechanisms	PREDICTED: probable inactive receptor kinase At5g58300 [Nicotiana tomentosiformis]
F02_cb17968_c1/f1p0/1005	--	--	--	--	--	--	--	--	--	S	Function unknown	PREDICTED: uncharacterized protein LOC105160397 [Sesamum indicum]
F01_cb19013_c0/f1p0/1336	[H]	Coenzyme transport and metabolism	Molecular Function: ATP binding (GO:0005524);; Biological Process: phosphate-containing compound metabolic process (GO:0006796);; Biological Process: biosynthetic process (GO:0009058);; Cellular Component: chloroplast (GO:0009507);; Molecular Function: kinase activity (GO:0016301);;	--	--	[FH]	--	Phosphoribulokinase / Uridine kinase family	--	H	Coenzyme transport and metabolism	hypothetical protein MIMGU_mgv1a010459mg [Erythranthe guttata]
F02_cb2547_c1/f1p0/3912	--	--	Molecular Function: galactokinase activity (GO:0004335);; Molecular Function: ATP binding (GO:0005524);; Biological Process: phosphorylation (GO:0016310);; Biological Process: cellulose biosynthetic process (GO:0030244);; Biological Process: GDP-L-fucose salvage (GO:0042352);; Molecular Function: fucose-1-phosphate guanylyltransferase activity (GO:0047341);; Biological Process: Golgi vesicle tran…	K05305|0|pxb:103927198|bifunctional fucokinase/fucose pyrophosphorylase; K05305 fucokinase [EC:2.7.1.52] (A)	ko00051:Fructose and mannose metabolism;ko00520:Amino sugar and nucleotide sugar metabolism	[G]	Carbohydrate transport and metabolism	L-fucokinase;; L-fucokinase;; L-fucokinase	Fucose-1-phosphate guanylyltransferase GN=FKGP OS=Arabidopsis thaliana (Mouse-ear cress) PE=1 SV=2	I	Lipid transport and metabolism	PREDICTED: bifunctional fucokinase/fucose pyrophosphorylase [Sesamum indicum]
F02_cb11533_c8/f1p0/874	--	--	Molecular Function: dolichyl-diphosphooligosaccharide-protein glycotransferase activity (GO:0004579);; Cellular Component: endoplasmic reticulum membrane (GO:0005789);; Biological Process: protein N-linked glycosylation via asparagine (GO:0018279);;	K12670|8.24165e-107|csv:101209991|dolichyl-diphosphooligosaccharide--protein glycosyltransferase 48 kDa subunit-like; K12670 oligosaccharyltransferase complex subunit beta (A)	ko00510:N-Glycan biosynthesis;ko04141:Protein processing in endoplasmic reticulum	[O]	Posttranslational modification, protein turnover, chaperones	Oligosaccharyltransferase 48 kDa subunit beta	Dolichyl-diphosphooligosaccharide--protein glycosyltransferase 48 kDa subunit (Precursor) GN=OJ1136_A05.21 OS=Oryza sativa subsp. japonica (Rice) PE=2 SV=1	S	Function unknown	PREDICTED: dolichyl-diphosphooligosaccharide--protein glycosyltransferase 48 kDa subunit-like [Sesamum indicum]
F01_cb92_c11/f1p0/4047	--	--	--	--	--	--	--	Protein of unknown function (DUF3133)	Uncharacterized protein At5g05190 GN=Y-1 OS=Arabidopsis thaliana (Mouse-ear cress) PE=1 SV=1	S	Function unknown	PREDICTED: uncharacterized protein At5g05190 [Sesamum indicum]
F01_cb16102_c0/f2p0/1394	[RTKL]	--	Molecular Function: protein serine/threonine kinase activity (GO:0004674);; Molecular Function: ATP binding (GO:0005524);; Biological Process: protein phosphorylation (GO:0006468);;	K08856|0|sot:102604374|serine/threonine-protein kinase 16-like; K08856 serine/threonine kinase 16 [EC:2.7.11.1] (A)	--	[KIT]	--	Protein kinase domain;; Protein tyrosine kinase	Serine/threonine-protein kinase Aurora-2 GN=AUR2 OS=Arabidopsis thaliana (Mouse-ear cress) PE=2 SV=2	T	Signal transduction mechanisms	PREDICTED: probable serine/threonine-protein kinase DDB_G0291350 [Sesamum indicum]
F02_cb13571_c1/f1p0/1353	--	--	--	--	--	--	--	--	--	S	Function unknown	PREDICTED: uncharacterized protein LOC105162958 [Sesamum indicum]
F02_cb2985_c3/f1p0/2877	--	--	--	--	--	--	--	Protein of unknown function (DUF3754)	--	S	Function unknown	PREDICTED: uncharacterized protein LOC105167185 isoform X2 [Sesamum indicum]
F02_cb15384_c4/f3p2/1120	[J]	Translation, ribosomal structure and biogenesis	Molecular Function: structural constituent of ribosome (GO:0003735);; Cellular Component: ribosome (GO:0005840);; Biological Process: translation (GO:0006412);;	K02866|1.10387e-151|cit:102626628|60S ribosomal protein L10-like; K02866 large subunit ribosomal protein L10e (A)	ko03010:Ribosome	[J]	Translation, ribosomal structure and biogenesis	Ribosomal protein L16p/L10e	60S ribosomal protein L10 GN=RPL10 OS=Solanum melongena (Eggplant) PE=2 SV=1	J	Translation, ribosomal structure and biogenesis	hypothetical protein MIMGU_mgv1a012042mg [Erythranthe guttata]
F01_cb20208_c4/f1p0/868	--	--	Molecular Function: acid-amino acid ligase activity (GO:0016881);;	K06689|6.6303e-75|sot:102599431|ubiquitin-conjugating enzyme E2 10-like; K06689 ubiquitin-conjugating enzyme E2 D/E [EC:6.3.2.19] (A)	ko04120:Ubiquitin mediated proteolysis;ko04141:Protein processing in endoplasmic reticulum	[O]	Posttranslational modification, protein turnover, chaperones	Ubiquitin-conjugating enzyme;; RWD domain	SUMO-conjugating enzyme UBC9 GN=T13J8.70 OS=Arabidopsis thaliana (Mouse-ear cress) PE=1 SV=1	O	Posttranslational modification, protein turnover, chaperones	PREDICTED: ubiquitin-conjugating enzyme E2-17 kDa-like [Sesamum indicum]
F01_cb614_c17/f1p0/2434	[J]	Translation, ribosomal structure and biogenesis	Molecular Function: translation elongation factor activity (GO:0003746);; Cellular Component: intracellular (GO:0005622);; Biological Process: translational elongation (GO:0006414);;	K02357|3.08664e-167|rcu:RCOM_1051260|elongation factor ts, putative; K02357 elongation factor Ts (A)	--	[J]	Translation, ribosomal structure and biogenesis	Elongation factor TS;; UBA/TS-N domain;; Domain of unknown function (DUF3594)	Elongation factor Ts, chloroplastic GN=tsf OS=Rhodomonas salina (Cryptomonas salina) PE=3 SV=1	J	Translation, ribosomal structure and biogenesis	PREDICTED: LOW QUALITY PROTEIN: uncharacterized protein LOC105173535 [Sesamum indicum]
F01_cb7556_c5/f1p0/2418	--	--	--	--	--	[S]	Function unknown	Uncharacterised protein family (UPF0183);; Uncharacterised protein family (UPF0183)	UPF0183 protein At3g51130 GN=At3g51130 OS=Arabidopsis thaliana (Mouse-ear cress) PE=2 SV=2	S	Function unknown	PREDICTED: UPF0183 protein At3g51130 [Nelumbo nucifera]
F01_cb3101_c31/f1p0/3271	[R]	General function prediction only	--	--	--	[T]	Signal transduction mechanisms	Rab-GTPase-TBC domain;; Rab-GTPase-TBC domain	--	S	Function unknown	PREDICTED: TBC1 domain family member 15 isoform X2 [Sesamum indicum]
F01_cb4004_c28/f1p0/3460	--	--	Biological Process: chloroplast organization (GO:0009658);; Biological Process: embryo development ending in seed dormancy (GO:0009793);; Biological Process: transcription from plastid promoter (GO:0042793);;	--	--	[R]	General function prediction only	PPR repeat;; PPR repeat family;; PPR repeat	Pentatricopeptide repeat-containing protein At5g67570, chloroplastic (Precursor) GN=K9I9.14 OS=Arabidopsis thaliana (Mouse-ear cress) PE=1 SV=2	S	Function unknown	PREDICTED: pentatricopeptide repeat-containing protein At5g67570, chloroplastic [Sesamum indicum]
F02_cb12128_c0/f1p0/1664	[C]	Energy production and conversion	Molecular Function: hydrogen ion transmembrane transporter activity (GO:0015078);; Biological Process: ATP hydrolysis coupled proton transport (GO:0015991);; Cellular Component: proton-transporting V-type ATPase, V1 domain (GO:0033180);;	K02148|0|vvi:100266332|V-type proton ATPase subunit C; K02148 V-type H+-transporting ATPase subunit C (A)	ko00190:Oxidative phosphorylation;ko04145:Phagosome	[C]	Energy production and conversion	V-ATPase subunit C	V-type proton ATPase subunit C GN=F13K23.9 OS=Arabidopsis thaliana (Mouse-ear cress) PE=1 SV=1	C	Energy production and conversion	PREDICTED: V-type proton ATPase subunit C [Beta vulgaris subsp. vulgaris]
F02_cb10710_c0/f5p1/777	--	--	--	--	--	--	--	Pollen proteins Ole e I like	--	S	Function unknown	hypothetical protein MIMGU_mgv1a015780mg [Erythranthe guttata]
F01_cb16438_c1012/f2p0/2530	[RTKL]	--	Molecular Function: protein serine/threonine kinase activity (GO:0004674);; Molecular Function: ATP binding (GO:0005524);; Cellular Component: nucleus (GO:0005634);; Cellular Component: cytosol (GO:0005829);; Cellular Component: plasma membrane (GO:0005886);; Biological Process: protein phosphorylation (GO:0006468);; Cellular Component: phragmoplast (GO:0009524);;	K08790|0|sly:101254034|serine/threonine-protein kinase tricorner; K08790 serine/threonine kinase 38 [EC:2.7.11.1] (A)	--	[R]	General function prediction only	Protein kinase domain;; Protein tyrosine kinase;; Protein kinase C terminal domain	Probable serine/threonine protein kinase IRE3 {ECO:0000305} OS=Arabidopsis thaliana (Mouse-ear cress) PE=2 SV=1	T	Signal transduction mechanisms	PREDICTED: serine/threonine-protein kinase tricorner-like [Sesamum indicum]
F02_cb15859_c4/f5p1/745	[J]	Translation, ribosomal structure and biogenesis	Molecular Function: structural constituent of ribosome (GO:0003735);; Cellular Component: ribosome (GO:0005840);; Biological Process: translation (GO:0006412);;	K02953|2.051e-102|tcc:TCM_005525|Ribosomal protein S13A; K02953 small subunit ribosomal protein S13e (A)	ko03010:Ribosome	[J]	Translation, ribosomal structure and biogenesis	Ribosomal S13/S15 N-terminal domain;; Ribosomal protein S15	40S ribosomal protein S13 GN=RPS13 OS=Glycine max (Soybean) PE=2 SV=1	J	Translation, ribosomal structure and biogenesis	Ribosomal protein S13A [Theobroma cacao]
F02_cb7324_c6/f1p0/1095	--	--	--	K14291|1.16678e-68|cic:CICLE_v10009210mg|hypothetical protein; K14291 phosphorylated adapter RNA export protein (A)	ko03013:RNA transport	[A]	RNA processing and modification	PHAX RNA-binding domain	--	U	Intracellular trafficking, secretion, and vesicular transport	PREDICTED: uncharacterized protein LOC105164691 isoform X2 [Sesamum indicum]
F02_cb6034_c3/f1p0/1899	--	--	--	K15032|1.01786e-74|tcc:TCM_034932|Mitochondrial transcription termination factor family protein, putative; K15032 mTERF domain-containing protein, mitochondrial (A)	--	[KR]	--	mTERF	--	S	Function unknown	PREDICTED: uncharacterized protein LOC105177210 [Sesamum indicum]
F02_cb8824_c2/f1p0/1808	[Q]	Secondary metabolites biosynthesis, transport and catabolism	--	K04123|1.90609e-180|fve:101291058|ent-kaurenoic acid oxidase 1-like; K04123 ent-kaurenoic acid hydroxylase [EC:1.14.13.79] (A)	ko00904:Diterpenoid biosynthesis	[QI]	--	Cytochrome P450;; Cytochrome P450	Ent-kaurenoic acid oxidase 2 GN=T32F6.4 OS=Arabidopsis thaliana (Mouse-ear cress) PE=2 SV=2	Q	Secondary metabolites biosynthesis, transport and catabolism	PREDICTED: ent-kaurenoic acid oxidase 2-like [Sesamum indicum]
F01_cb6249_c7/f1p0/1782	--	--	Molecular Function: hydrolase activity, hydrolyzing O-glycosyl compounds (GO:0004553);; Biological Process: metabolic process (GO:0008152);;	K06617|1.16967e-96|vvi:100253252|probable galactinol--sucrose galactosyltransferase 1; K06617 raffinose synthase [EC:2.4.1.82] (A)	ko00052:Galactose metabolism	--	--	Raffinose synthase or seed imbibition protein Sip1;; Raffinose synthase or seed imbibition protein Sip1;; Raffinose synthase or seed imbibition protein Sip1;; Raffinose synthase or seed imbibition protein Sip1;; Raffinose synthase or seed imbibition protein Sip1	Probable galactinol--sucrose galactosyltransferase 1 OS=Arabidopsis thaliana (Mouse-ear cress) PE=2 SV=1	S	Function unknown	hypothetical protein MIMGU_mgv1a002039mg [Erythranthe guttata]
F01_cb16438_c45995/f2p1/2617	--	--	Cellular Component: membrane (GO:0016020);;	--	--	[R]	General function prediction only	Root hair defective 3 GTP-binding protein (RHD3);; 50S ribosome-binding GTPase;; Guanylate-binding protein, N-terminal domain	Protein ROOT HAIR DEFECTIVE 3 homolog 2 {ECO:0000255|HAMAP-Rule:MF_03109} GN=At5g45160 OS=Arabidopsis thaliana (Mouse-ear cress) PE=2 SV=1	Z	Cytoskeleton	PREDICTED: protein ROOT HAIR DEFECTIVE 3 homolog 2 isoform X1 [Sesamum indicum]
F01_cb9407_c14/f1p1/1323	--	--	--	--	--	--	--	--	PGR5-like protein 1A, chloroplastic (Precursor) GN=PGRL1A OS=Arabidopsis thaliana (Mouse-ear cress) PE=1 SV=1	S	Function unknown	PREDICTED: PGR5-like protein 1A, chloroplastic [Sesamum indicum]
F02_cb16923_c1/f6p1/688	--	--	Cellular Component: cytoplasmic membrane-bounded vesicle (GO:0016023);;	--	--	--	--	Thaumatin family	Thaumatin-like protein (Precursor) OS=Oryza sativa subsp. japonica (Rice) PE=1 SV=1	S	Function unknown	pathogenesis-related thaumatin family protein [Medicago truncatula]
F02_cb7202_c2/f2p1/2372	--	--	Molecular Function: hydrolase activity (GO:0016787);;	--	--	[IOT]	--	Lipase 3 N-terminal region;; Lipase (class 3)	--	S	Function unknown	hypothetical protein MIMGU_mgv1a027030mg [Erythranthe guttata]
F01_cb16229_c8/f1p0/1383	--	--	Cellular Component: plasma membrane (GO:0005886);;	--	--	--	--	Late embryogenesis abundant protein	--	S	Function unknown	PREDICTED: uncharacterized protein LOC105169169 isoform X1 [Sesamum indicum]
F02_cb13034_c0/f1p0/1489	--	--	Molecular Function: rosmarinate synthase activity (GO:0050266);;	K13065|2.37232e-99|rcu:RCOM_1442250|Anthranilate N-benzoyltransferase protein, putative (EC:2.3.1.144); K13065 shikimate O-hydroxycinnamoyltransferase [EC:2.3.1.133] (A)	ko00940:Phenylpropanoid biosynthesis;ko00941:Flavonoid biosynthesis;ko00945:Stilbenoid, diarylheptanoid and gingerol biosynthesis	--	--	Transferase family;; Transferase family;; Transferase family	Rosmarinate synthase GN=RAS OS=Plectranthus scutellarioides (Coleus) PE=1 SV=1	S	Function unknown	hydroxycinnamoyl-CoA shikimate/quinate hydroxycinnamoyltransferase [Ipomoea batatas]
F01_cb7617_c1/f1p0/2406	[S]	Function unknown	Cellular Component: plasma membrane (GO:0005886);; Biological Process: oligopeptide transport (GO:0006857);; Biological Process: response to iron ion (GO:0010039);; Molecular Function: oligopeptide transporter activity (GO:0015198);; Biological Process: seed development (GO:0048316);; Molecular Function: iron-nicotianamine transmembrane transporter activity (GO:0051980);; Biological Process: tran…	--	--	--	--	OPT oligopeptide transporter protein;; OPT oligopeptide transporter protein	Metal-nicotianamine transporter YSL1 GN=YSL1 OS=Arabidopsis thaliana (Mouse-ear cress) PE=2 SV=2	S	Function unknown	hypothetical protein MIMGU_mgv1a002430mg [Erythranthe guttata]
F02_cb11041_c46220/f1p0/1581	[J]	Translation, ribosomal structure and biogenesis	Molecular Function: structural constituent of ribosome (GO:0003735);; Cellular Component: ribosome (GO:0005840);; Biological Process: translation (GO:0006412);;	K02866|5.94172e-152|gmx:100815571|60S ribosomal protein L10-like; K02866 large subunit ribosomal protein L10e (A)	ko03010:Ribosome	[J]	Translation, ribosomal structure and biogenesis	Large coat protein;; Ribosomal protein L16p/L10e	60S ribosomal protein L10 GN=RPL10 OS=Vitis riparia (Frost grape) PE=2 SV=1	J	Translation, ribosomal structure and biogenesis	hypothetical protein MIMGU_mgv1a012042mg [Erythranthe guttata]
F02_cb6088_c8/f1p0/2538	--	--	Biological Process: cellular metabolic process (GO:0044237);;	--	--	[S]	Function unknown	Domain of unknown function (DUF4205)	--	S	Function unknown	PREDICTED: protein FAM188A [Sesamum indicum]
F02_cb6247_c2/f1p0/1699	--	--	--	K03217|7.40894e-140|sot:102599172|ALBINO3-like protein 3, mitochondrial-like; K03217 YidC/Oxa1 family membrane protein insertase (A)	ko03060:Protein export	[OU]	--	Tetratricopeptide repeat;; Tetratricopeptide repeat;; Tetratricopeptide repeat;; Tetratricopeptide repeat;; 60Kd inner membrane protein;; TPR repeat;; Tetratricopeptide repeat;; Tetratricopeptide repeat	ALBINO3-like protein 3, mitochondrial (Precursor) GN=T22K7_50/T22K7_40 OS=Arabidopsis thaliana (Mouse-ear cress) PE=2 SV=1	U	Intracellular trafficking, secretion, and vesicular transport	PREDICTED: ALBINO3-like protein 2, chloroplastic isoform X1 [Sesamum indicum]
F02_cb11041_c4626/f2p0/3762	--	--	--	--	--	--	--	Transcription factor regulating root and shoot growth via Pin3	Protein Brevis radix-like 2 GN=BRXL2 OS=Arabidopsis thaliana (Mouse-ear cress) PE=2 SV=1	S	Function unknown	PREDICTED: protein Brevis radix-like 2 [Sesamum indicum]
F01_cb16438_c4998/f1p1/2861	--	--	--	--	--	--	--	--	--	S	Function unknown	PREDICTED: transcription factor bHLH143-like [Sesamum indicum]
F02_cb11041_c86750/f1p0/1469	--	--	Molecular Function: transferase activity, transferring phosphorus-containing groups (GO:0016772);;	--	--	[T]	Signal transduction mechanisms	--	--	T	Signal transduction mechanisms	hypothetical protein F383_12939 [Gossypium arboreum]
F01_cb4437_c59/f1p0/2725	--	--	Biological Process: microtubule cytoskeleton organization (GO:0000226);; Biological Process: cytokinesis (GO:0000910);; Molecular Function: microtubule binding (GO:0008017);;	K16732|0|sot:102598747|65-kDa microtubule-associated protein 6-like; K16732 protein regulator of cytokinesis 1 (A)	--	[DZ]	--	Microtubule associated protein (MAP65/ASE1 family)	65-kDa microtubule-associated protein 6 GN=MAP65-6 OS=Arabidopsis thaliana (Mouse-ear cress) PE=1 SV=1	S	Function unknown	PREDICTED: 65-kDa microtubule-associated protein 6-like [Sesamum indicum]
F01_cb3401_c8/f1p0/1014	--	--	Molecular Function: nucleotide binding (GO:0000166);; Cellular Component: nuclear exosome (RNase complex) (GO:0000176);; Molecular Function: nucleic acid binding (GO:0003676);; Biological Process: RNA processing (GO:0006396);; Molecular Function: 3'-5' exonuclease activity (GO:0008408);; Molecular Function: transferase activity (GO:0016740);;	K12591|1.39099e-17|mtr:MTR_7g086370|Exosome complex exonuclease rrp6; K12591 exosome complex exonuclease RRP6 [EC:3.1.13.-] (A)	ko03018:RNA degradation	[J]	Translation, ribosomal structure and biogenesis	3'-5' exonuclease	--	J	Translation, ribosomal structure and biogenesis	HRDC; Polynucleotidyl transferase, Ribonuclease H fold [Medicago truncatula]
F02_cb11041_c1765/f1p0/2625	--	--	--	--	--	--	--	--	--	S	Function unknown	PREDICTED: uncharacterized protein LOC105173510 isoform X2 [Sesamum indicum]
F02_cb11041_c18750/f1p1/2841	--	--	--	--	--	--	--	Large coat protein;; Small coat protein;; Large coat protein	--	--	--	--
F01_cb16438_c31955/f5p0/1808	[S]	Function unknown	Biological Process: maltose metabolic process (GO:0000023);; Biological Process: response to blue light (GO:0009637);; Biological Process: regulation of proton transport (GO:0010155);; Biological Process: starch biosynthetic process (GO:0019252);; Biological Process: isopentenyl diphosphate biosynthetic process, methylerythritol 4-phosphate pathway (GO:0019288);; Biological Process: positive regu…	K09919|0|vvi:100262534|uncharacterized LOC100262534; K09919 hypothetical protein (A)	--	--	--	Protein of unknown function, DUF482;; Acetyltransferase (GNAT) domain	--	S	Function unknown	PREDICTED: uncharacterized protein LOC105169061 [Sesamum indicum]
F01_cb13299_c41/f1p0/874	--	--	--	--	--	--	--	Extensin-like region	--	--	--	--
F02_cb11041_c1720/f4p0/2412	--	--	--	--	--	--	--	--	--	S	Function unknown	hypothetical protein M569_10301, partial [Genlisea aurea]
F02_cb2707_c5/f1p0/3313	[G]	Carbohydrate transport and metabolism	--	--	--	--	--	AAA domain	--	G	Carbohydrate transport and metabolism	hypothetical protein MIMGU_mgv1a005571mg [Erythranthe guttata]
F02_cb7601_c9/f1p0/2054	[O]	Posttranslational modification, protein turnover, chaperones	Biological Process: maltose metabolic process (GO:0000023);; Molecular Function: ATP binding (GO:0005524);; Biological Process: phosphatidylglycerol biosynthetic process (GO:0006655);; Cellular Component: chloroplast stroma (GO:0009570);; Cellular Component: chloroplast envelope (GO:0009941);; Biological Process: mRNA modification (GO:0016556);; Biological Process: starch biosynthetic process (GO…	K04077|0|sot:102597087|chaperonin 60 subunit beta 4, chloroplastic-like; K04077 chaperonin GroEL (A)	ko03018:RNA degradation	[O]	Posttranslational modification, protein turnover, chaperones	TCP-1/cpn60 chaperonin family	Chaperonin 60 subunit beta 4, chloroplastic (Precursor) GN=F28B23.11 OS=Arabidopsis thaliana (Mouse-ear cress) PE=1 SV=1	O	Posttranslational modification, protein turnover, chaperones	PREDICTED: chaperonin 60 subunit beta 4, chloroplastic isoform X1 [Sesamum indicum]
F02_cb17364_c0/f3p0/1157	[J]	Translation, ribosomal structure and biogenesis	Cellular Component: ribosome (GO:0005840);; Cellular Component: chloroplast (GO:0009507);; Molecular Function: rRNA binding (GO:0019843);; Biological Process: ribosome biogenesis (GO:0042254);;	K02864|1.13759e-108|sly:101256669|50S ribosomal protein L10, chloroplastic; K02864 large subunit ribosomal protein L10 (A)	ko03010:Ribosome	--	--	Ribosomal protein L10	50S ribosomal protein L10, chloroplastic (Precursor) GN=RPL10 OS=Nicotiana tabacum (Common tobacco) PE=2 SV=1	J	Translation, ribosomal structure and biogenesis	PREDICTED: 50S ribosomal protein L10, chloroplastic [Sesamum indicum]
F01_cb9912_c4/f2p1/1856	--	--	Molecular Function: ion binding (GO:0043167);; Biological Process: single-organism transport (GO:0044765);; Biological Process: intracellular transport (GO:0046907);;	--	--	[R]	General function prediction only	FYVE zinc finger	1-phosphatidylinositol-3-phosphate 5-kinase FAB1B GN=FAB1B OS=Arabidopsis thaliana (Mouse-ear cress) PE=2 SV=1	S	Function unknown	PREDICTED: uncharacterized protein LOC105178178 [Sesamum indicum]
F02_cb6053_c2/f1p0/2221	[O]	Posttranslational modification, protein turnover, chaperones	Molecular Function: protein binding (GO:0005515);; Biological Process: response to heat (GO:0009408);; Biological Process: cellular metabolic process (GO:0044237);; Biological Process: primary metabolic process (GO:0044238);; Biological Process: single-organism metabolic process (GO:0044710);; Biological Process: single-organism cellular process (GO:0044763);; Biological Process: organic substanc…	--	--	[O]	Posttranslational modification, protein turnover, chaperones	DnaJ domain;; Thioredoxin-like domain	DnaJ protein ERDJ3A (Precursor) GN=T16O11.7 OS=Arabidopsis thaliana (Mouse-ear cress) PE=1 SV=1	O	Posttranslational modification, protein turnover, chaperones	unnamed protein product [Coffea canephora]
F02_cb12538_c0/f1p0/1588	[HC]	--	--	--	--	[CR]	--	FAD binding domain;; NAD(P)-binding Rossmann-like domain;; FAD dependent oxidoreductase;; Lycopene cyclase protein;; Pyridine nucleotide-disulphide oxidoreductase	Zeaxanthin epoxidase, chloroplastic (Precursor) GN=At5g67030 OS=Arabidopsis thaliana (Mouse-ear cress) PE=1 SV=1	CH	--	PREDICTED: zeaxanthin epoxidase, chloroplastic-like [Beta vulgaris subsp. vulgaris]
F01_cb11444_c0/f1p0/1872	--	--	Molecular Function: carboxypeptidase activity (GO:0004180);;	K16296|0|cmo:103487220|serine carboxypeptidase 1-like; K16296 serine carboxypeptidase-like clade I [EC:3.4.16.-] (A)	--	[OE]	--	Serine carboxypeptidase;; Serine carboxypeptidase	Serine carboxypeptidase-like 20 (Precursor) GN=SCPL20 OS=Arabidopsis thaliana (Mouse-ear cress) PE=2 SV=2	E	Amino acid transport and metabolism	PREDICTED: serine carboxypeptidase-like 20 [Beta vulgaris subsp. vulgaris]
F02_cb17482_c1/f1p0/989	--	--	--	--	--	--	--	Senescence regulator	--	S	Function unknown	PREDICTED: uncharacterized protein LOC105170029 [Sesamum indicum]
F02_cb13341_c12/f1p0/3297	[C]	Energy production and conversion	Cellular Component: nucleus (GO:0005634);; Cellular Component: vacuole (GO:0005773);; Cellular Component: plasma membrane (GO:0005886);; Biological Process: tricarboxylic acid cycle (GO:0006099);; Biological Process: malate metabolic process (GO:0006108);; Cellular Component: chloroplast stroma (GO:0009570);; Biological Process: response to salt stress (GO:0009651);; Biological Process: response …	K00025|3.50602e-172|pop:POPTR_0008s16670g|POPTRDRAFT_564942; cytosolic malate dehydrogenase family protein; K00025 malate dehydrogenase [EC:1.1.1.37] (A)	ko00020:Citrate cycle (TCA cycle);ko00270:Cysteine and methionine metabolism;ko00620:Pyruvate metabolism;ko00630:Glyoxylate and dicarboxylate metabolism;ko00710:Carbon fixation in photosynthetic organisms;ko01200:Carbon metabolism	[C]	Energy production and conversion	lactate/malate dehydrogenase, alpha/beta C-terminal domain;; lactate/malate dehydrogenase, NAD binding domain;; lactate/malate dehydrogenase, NAD binding domain	Malate dehydrogenase GN=MD1 OS=Nicotiana tabacum (Common tobacco) PE=1 SV=1	C	Energy production and conversion	PREDICTED: malate dehydrogenase [Sesamum indicum]
F01_cb9879_c3/f1p0/1783	--	--	--	K14638|1.40816e-123|tcc:TCM_036497|Major facilitator superfamily protein; K14638 solute carrier family 15 (peptide/histidine transporter), member 3/4 (A)	--	[E]	Amino acid transport and metabolism	POT family	Protein NRT1/ PTR FAMILY 5.10 GN=NPF5.10 OS=Arabidopsis thaliana (Mouse-ear cress) PE=2 SV=1	E	Amino acid transport and metabolism	hypothetical protein MIMGU_mgv1a003626mg [Erythranthe guttata]
F02_cb11041_c88007/f1p1/2083	[R]	General function prediction only	Molecular Function: nucleotide binding (GO:0000166);; Molecular Function: RNA binding (GO:0003723);; Cellular Component: nucleus (GO:0005634);; Biological Process: mRNA processing (GO:0006397);;	K13091|7.38918e-163|sot:102604200|RNA-binding protein 39-like; K13091 RNA-binding protein 39 (A)	--	[K]	Transcription	RNA recognition motif. (a.k.a. RRM, RBD, or RNP domain);; RNA recognition motif (a.k.a. RRM, RBD, or RNP domain);; RNA recognition motif. (a.k.a. RRM, RBD, or RNP domain);; linker between RRM2 and RRM3 domains in RBM39 protein;; RNA recognition motif. (a.k.a. RRM, RBD, or RNP domain)	31 kDa ribonucleoprotein, chloroplastic (Precursor) OS=Nicotiana plumbaginifolia (Leadwort-leaved tobacco) PE=2 SV=1	S	Function unknown	PREDICTED: RNA-binding protein 39 [Sesamum indicum]
F01_cb12214_c2/f1p0/1787	[I]	Lipid transport and metabolism	Molecular Function: carboxylic ester hydrolase activity (GO:0052689);;	--	--	[V]	Defense mechanisms	alpha/beta hydrolase fold	Probable carboxylesterase 11 GN=CXE11 OS=Arabidopsis thaliana (Mouse-ear cress) PE=2 SV=1	I	Lipid transport and metabolism	PREDICTED: probable carboxylesterase 16 [Nicotiana tomentosiformis]
F01_cb16438_c10172/f1p0/3006	--	--	--	--	--	--	--	--	--	S	Function unknown	PREDICTED: uncharacterized protein LOC105175670 isoform X2 [Sesamum indicum]
F02_cb6740_c0/f1p0/2485	--	--	--	--	--	[S]	Function unknown	Uncharacterized conserved protein (DUF2043)	UV-stimulated scaffold protein A homolog GN=At3g61800 OS=Arabidopsis thaliana (Mouse-ear cress) PE=3 SV=1	S	Function unknown	unnamed protein product [Vitis vinifera]
F02_cb17046_c0/f1p0/1136	[QR]	--	Molecular Function: transferase activity (GO:0016740);;	--	--	[R]	General function prediction only	O-methyltransferase;; Dimerisation domain	(R,S)-reticuline 7-O-methyltransferase GN=PSOMT1 OS=Papaver somniferum (Opium poppy) PE=1 SV=1	S	Function unknown	PREDICTED: (RS)-norcoclaurine 6-O-methyltransferase-like [Sesamum indicum]
F02_cb19224_c1/f1p0/545	--	--	--	--	--	--	--	--	Pathogenesis-related protein (Precursor) OS=Juniperus ashei (Ozark white cedar) PE=1 SV=1	S	Function unknown	PREDICTED: thaumatin-like protein 1 [Sesamum indicum]
F01_cb5028_c16/f1p1/2215	--	--	--	--	--	--	--	--	--	S	Function unknown	hypothetical protein M569_00680, partial [Genlisea aurea]
F01_cb6655_c3/f1p0/1482	[T]	Signal transduction mechanisms	--	K06269|1.59275e-118|gmx:100799218|serine/threonine-protein phosphatase PP1-like; K06269 serine/threonine-protein phosphatase PP1 catalytic subunit [EC:3.1.3.16] (A)	ko03015:mRNA surveillance pathway	[TR]	--	Calcineurin-like phosphoesterase;; Calcineurin-like phosphoesterase	Serine/threonine-protein phosphatase PP1 OS=Oryza sativa subsp. japonica (Rice) PE=2 SV=2	T	Signal transduction mechanisms	uncharacterized protein LOC100799218 [Glycine max]
F02_cb1082_c3/f1p0/1481	--	--	--	--	--	--	--	Myb/SANT-like DNA-binding domain	--	S	Function unknown	PREDICTED: uncharacterized protein LOC101253719 isoform X3 [Solanum lycopersicum]
F02_cb2818_c12/f1p0/3212	[GEPR]	--	Cellular Component: plasma membrane (GO:0005886);; Biological Process: carbohydrate transport (GO:0008643);; Biological Process: response to nematode (GO:0009624);; Cellular Component: plant-type vacuole membrane (GO:0009705);; Cellular Component: integral component of membrane (GO:0016021);; Molecular Function: substrate-specific transmembrane transporter activity (GO:0022891);; Molecular Functi…	--	--	[R]	General function prediction only	Sugar (and other) transporter;; Major Facilitator Superfamily	Monosaccharide-sensing protein 2 GN=MSSP2 OS=Arabidopsis thaliana (Mouse-ear cress) PE=1 SV=2	G	Carbohydrate transport and metabolism	PREDICTED: monosaccharide-sensing protein 2-like [Sesamum indicum]
F02_cb17040_c4/f1p0/997	--	--	--	--	--	--	--	Domain of unknown function (DUF588)	--	--	--	PREDICTED: CASP-like protein 4D1 [Sesamum indicum]
F01_cb18426_c13/f1p1/1114	--	--	--	K13464|1.56933e-43|sly:101247936|protein TIFY 10A-like; K13464 jasmonate ZIM domain-containing protein (A)	ko04075:Plant hormone signal transduction	--	--	tify domain;; Divergent CCT motif	Protein TIFY 10A GN=T29M8.5 OS=Arabidopsis thaliana (Mouse-ear cress) PE=1 SV=1	S	Function unknown	PREDICTED: protein TIFY 10A-like isoform X3 [Sesamum indicum]
F01_cb8332_c0/f16p1/2233	--	--	Cellular Component: signal recognition particle, endoplasmic reticulum targeting (GO:0005786);; Biological Process: SRP-dependent cotranslational protein targeting to membrane (GO:0006614);; Molecular Function: 7S RNA binding (GO:0008312);;	K03108|0|sly:101255954|signal recognition particle subunit SRP72; K03108 signal recognition particle subunit SRP72 (A)	ko03060:Protein export	[U]	Intracellular trafficking, secretion, and vesicular transport	SRP72 RNA-binding domain;; Tetratricopeptide repeat;; Anaphase-promoting complex, cyclosome, subunit 3;; Tetratricopeptide repeat	--	U	Intracellular trafficking, secretion, and vesicular transport	PREDICTED: signal recognition particle subunit SRP72-like [Sesamum indicum]
F02_cb16398_c2/f1p0/855	--	--	Cellular Component: mitochondrion (GO:0005739);; Cellular Component: peroxisome (GO:0005777);; Biological Process: peroxisome fission (GO:0016559);;	K17969|4.94815e-81|sot:102599821|mitochondrial fission 1 protein A-like; K17969 mitochondrial fission 1 protein (A)	--	[M]	Cell wall/membrane/envelope biogenesis	Fis1 C-terminal tetratricopeptide repeat;; Fis1 N-terminal tetratricopeptide repeat	Mitochondrial fission 1 protein A GN=F24I3.1700 OS=Arabidopsis thaliana (Mouse-ear cress) PE=1 SV=1	U	Intracellular trafficking, secretion, and vesicular transport	PREDICTED: mitochondrial fission 1 protein A-like [Nicotiana sylvestris]
F01_cb9865_c0/f2p0/1661	[Q]	Secondary metabolites biosynthesis, transport and catabolism	Molecular Function: binding (GO:0005488);; Molecular Function: oxidoreductase activity (GO:0016491);;	--	--	[Q]	Secondary metabolites biosynthesis, transport and catabolism	Cytochrome P450	Cytochrome P450 71A8 GN=CYP71A8 OS=Mentha piperita (Peppermint) PE=3 SV=1	Q	Secondary metabolites biosynthesis, transport and catabolism	cytochrome P450 CYP71AU53 [Salvia miltiorrhiza]
F01_cb5928_c1/f1p0/2597	[R]	General function prediction only	--	--	--	[Z]	Cytoskeleton	Tetratricopeptide repeat;; Tetratricopeptide repeat;; TPR repeat;; Tetratricopeptide repeat;; Tetratricopeptide repeat;; Tetratricopeptide repeat;; Tetratricopeptide repeat;; Soluble NSF attachment protein, SNAP;; Uncharacterized protein conserved in bacteria (DUF2225);; Tetratricopeptide repeat;; Tetratricopeptide repeat;; Tetratricopeptide repeat;; Tetratricopeptide repeat;; Tetratricopeptide r…	--	S	Function unknown	hypothetical protein L484_020503 [Morus notabilis]
F01_cb20117_c2/f1p0/773	--	--	--	--	--	--	--	Cotton fibre expressed protein	--	S	Function unknown	unnamed protein product [Coffea canephora]
F01_cb20170_c6/f1p0/1283	[J]	Translation, ribosomal structure and biogenesis	Molecular Function: translation elongation factor activity (GO:0003746);; Cellular Component: cytosol (GO:0005829);; Cellular Component: eukaryotic translation elongation factor 1 complex (GO:0005853);; Cellular Component: plasma membrane (GO:0005886);; Biological Process: translational elongation (GO:0006414);; Biological Process: lignin metabolic process (GO:0009808);; Biological Process: plant…	K03232|9.11901e-49|vvi:100252524|elongation factor 1-delta; K03232 elongation factor 1-beta (A)	--	[K]	Transcription	--	Elongation factor 1-delta OS=Pimpinella brachycarpa PE=2 SV=3	J	Translation, ribosomal structure and biogenesis	unnamed protein product [Vitis vinifera]
F02_cb3757_c2/f1p0/1563	[RTKL]	--	--	--	--	[T]	Signal transduction mechanisms	Protein kinase domain;; Protein tyrosine kinase;; Kinase-like	Mitogen-activated protein kinase kinase kinase YODA GN=YDA OS=Arabidopsis thaliana (Mouse-ear cress) PE=1 SV=1	T	Signal transduction mechanisms	PREDICTED: mitogen-activated protein kinase kinase kinase YODA-like isoform X4 [Sesamum indicum]
F01_cb20703_c1/f1p0/1545	--	--	Molecular Function: magnesium ion transmembrane transporter activity (GO:0015095);; Biological Process: magnesium ion transport (GO:0015693);; Cellular Component: membrane (GO:0016020);; Biological Process: transmembrane transport (GO:0055085);;	K16075|2.17509e-171|rcu:RCOM_0992230|RNA splicing protein mrs2, mitochondrial, putative; K16075 magnesium transporter (A)	--	[P]	Inorganic ion transport and metabolism	CorA-like Mg2+ transporter protein	Magnesium transporter MRS2-I GN=MRS2-I OS=Oryza sativa subsp. indica (Rice) PE=3 SV=1	U	Intracellular trafficking, secretion, and vesicular transport	PREDICTED: magnesium transporter MRS2-I-like [Sesamum indicum]
F01_cb14669_c0/f1p0/842	--	--	--	--	--	--	--	--	PGR5-like protein 1B, chloroplastic (Precursor) GN=PGRL1B OS=Arabidopsis thaliana (Mouse-ear cress) PE=1 SV=1	S	Function unknown	PREDICTED: PGR5-like protein 1B, chloroplastic isoform X1 [Sesamum indicum]
F01_cb10752_c2/f3p2/1376	--	--	Biological Process: xylem development (GO:0010089);; Biological Process: cell wall macromolecule metabolic process (GO:0044036);;	--	--	--	--	GDSL/SGNH-like Acyl-Esterase family found in Pmr5 and Cas1p;; PMR5 N terminal Domain	Protein trichome birefringence-like 36 GN=TBL36 OS=Arabidopsis thaliana (Mouse-ear cress) PE=2 SV=1	S	Function unknown	PREDICTED: protein trichome birefringence-like 36 [Sesamum indicum]
F01_cb10132_c6/f1p0/1580	--	--	Molecular Function: SNAP receptor activity (GO:0005484);; Biological Process: intracellular protein transport (GO:0006886);; Cellular Component: membrane (GO:0016020);; Biological Process: vesicle-mediated transport (GO:0016192);;	K08488|3.14243e-74|mtr:MTR_8g066340|Syntaxin; K08488 syntaxin 7 (A)	ko04130:SNARE interactions in vesicular transport;ko04145:Phagosome	[U]	Intracellular trafficking, secretion, and vesicular transport	Syntaxin-like protein	Syntaxin-23 GN=SYP23 OS=Arabidopsis thaliana (Mouse-ear cress) PE=1 SV=1	U	Intracellular trafficking, secretion, and vesicular transport	PREDICTED: syntaxin-22-like [Populus euphratica]
F01_cb2099_c0/f1p0/3565	[RTKL]	--	Molecular Function: G-protein coupled receptor kinase activity (GO:0004703);; Molecular Function: ATP binding (GO:0005524);; Biological Process: protein phosphorylation (GO:0006468);; Cellular Component: integral component of membrane (GO:0016021);; Molecular Function: 2-alkenal reductase [NAD(P)] activity (GO:0032440);; Biological Process: oxidation-reduction process (GO:0055114);;	--	--	--	--	Protein kinase domain;; Protein tyrosine kinase;; Leucine rich repeat;; Leucine Rich repeats (2 copies);; Leucine Rich Repeat;; Leucine Rich repeat;; Leucine rich repeat;; Leucine Rich repeats (2 copies);; Leucine Rich Repeat;; Leucine rich repeat;; Leucine rich repeat N-terminal domain;; Leucine Rich repeat;; Leucine rich repeat;; Protein tyrosine kinase	Probably inactive leucine-rich repeat receptor-like protein kinase At3g28040 (Precursor) GN=At3g28040 OS=Arabidopsis thaliana (Mouse-ear cress) PE=2 SV=1	S	Function unknown	PREDICTED: probably inactive leucine-rich repeat receptor-like protein kinase At3g28040 [Sesamum indicum]
F01_cb6196_c10/f1p0/2137	--	--	--	--	--	--	--	Protein of unknown function (DUF1446)	--	S	Function unknown	PREDICTED: uncharacterized protein LOC105173178 [Sesamum indicum]
F01_cb16438_c21623/f1p0/3489	[I]	Lipid transport and metabolism	--	K01115|5.80966e-161|cit:102622948|phospholipase D delta-like; K01115 phospholipase D1/2 [EC:3.1.4.4] (A)	ko00564:Glycerophospholipid metabolism;ko00565:Ether lipid metabolism;ko04144:Endocytosis	[I]	Lipid transport and metabolism	C2 domain;; Phospholipase D C terminal;; Phospholipase D Active site motif	Phospholipase D delta GN=PLDDELTA OS=Arabidopsis thaliana (Mouse-ear cress) PE=1 SV=2	I	Lipid transport and metabolism	PREDICTED: phospholipase D delta-like [Populus euphratica]
F02_cb11453_c1/f4p0/1785	[Q]	Secondary metabolites biosynthesis, transport and catabolism	Molecular Function: monooxygenase activity (GO:0004497);; Molecular Function: oxidoreductase activity, acting on paired donors, with incorporation or reduction of molecular oxygen (GO:0016705);; Molecular Function: metal ion binding (GO:0046872);;	--	--	[Q]	Secondary metabolites biosynthesis, transport and catabolism	Cytochrome P450	Cytochrome P450 82A3 GN=CYP82A3 OS=Glycine max (Soybean) PE=2 SV=1	Q	Secondary metabolites biosynthesis, transport and catabolism	Cytochrome P450 [Theobroma cacao]
F02_cb6063_c24/f1p0/2244	[EH]	--	Molecular Function: magnesium ion binding (GO:0000287);; Molecular Function: acetolactate synthase activity (GO:0003984);; Biological Process: isoleucine biosynthetic process (GO:0009097);; Biological Process: valine biosynthetic process (GO:0009099);; Cellular Component: chloroplast (GO:0009507);; Biological Process: response to herbicide (GO:0009635);; Molecular Function: thiamine pyrophosphate…	K01652|0|sly:101247891|acetolactate synthase 2, chloroplastic; K01652 acetolactate synthase I/II/III large subunit [EC:2.2.1.6] (A)	ko00290:Valine, leucine and isoleucine biosynthesis;ko00650:Butanoate metabolism;ko00660:C5-Branched dibasic acid metabolism;ko00770:Pantothenate and CoA biosynthesis;ko01210:2-Oxocarboxylic acid metabolism;ko01230:Biosynthesis of amino acids	[EH]	--	Thiamine pyrophosphate enzyme, C-terminal TPP binding domain;; Thiamine pyrophosphate enzyme, N-terminal TPP binding domain;; Thiamine pyrophosphate enzyme, central domain	Acetolactate synthase 1, chloroplastic (Precursor) OS=Nicotiana tabacum (Common tobacco) PE=1 SV=1	E	Amino acid transport and metabolism	PREDICTED: acetolactate synthase 1, chloroplastic [Sesamum indicum]
F01_cb9100_c7/f1p0/1841	--	--	--	--	--	[O]	Posttranslational modification, protein turnover, chaperones	Xylanase inhibitor C-terminal;; Eukaryotic aspartyl protease;; Xylanase inhibitor N-terminal	Aspartic proteinase Asp1 (Precursor) GN=OsJ_031884 OS=Oryza sativa subsp. japonica (Rice) PE=2 SV=1	O	Posttranslational modification, protein turnover, chaperones	PREDICTED: aspartic proteinase Asp1 isoform X1 [Sesamum indicum]
F02_cb13384_c6/f1p3/1164	[E]	Amino acid transport and metabolism	Molecular Function: lactoylglutathione lyase activity (GO:0004462);; Cellular Component: vacuole (GO:0005773);; Cellular Component: peroxisome (GO:0005777);; Cellular Component: cytosol (GO:0005829);; Cellular Component: plasma membrane (GO:0005886);; Biological Process: gluconeogenesis (GO:0006094);; Biological Process: glycolytic process (GO:0006096);; Biological Process: response to salt stres…	K01759|0|vvi:100257313|putative lactoylglutathione lyase; K01759 lactoylglutathione lyase [EC:4.4.1.5] (A)	ko00620:Pyruvate metabolism	[G]	Carbohydrate transport and metabolism	Glyoxalase/Bleomycin resistance protein/Dioxygenase superfamily;; Glyoxalase-like domain;; Glyoxalase/Bleomycin resistance protein/Dioxygenase superfamily;; CppA N-terminal	Lactoylglutathione lyase GN=OSJNBa0056O06.9-1 OS=Oryza sativa subsp. japonica (Rice) PE=1 SV=2	E	Amino acid transport and metabolism	PREDICTED: putative lactoylglutathione lyase [Sesamum indicum]
F02_cb7825_c14/f1p0/2162	--	--	--	--	--	--	--	Domain of unknown function (DUF3411)	--	S	Function unknown	PREDICTED: uncharacterized protein LOC105169153 [Sesamum indicum]
F01_cb20512_c2/f1p0/1485	--	--	Biological Process: response to stress (GO:0006950);; Biological Process: single-organism cellular process (GO:0044763);;	--	--	--	--	--	--	S	Function unknown	PREDICTED: uncharacterized protein LOC105168503 isoform X2 [Sesamum indicum]
F01_cb16438_c46389/f3p0/2092	[R]	General function prediction only	Molecular Function: metalloendopeptidase activity (GO:0004222);; Cellular Component: mitochondrial inner membrane (GO:0005743);; Biological Process: proteolysis (GO:0006508);; Molecular Function: ubiquinol-cytochrome-c reductase activity (GO:0008121);; Biological Process: electron transport chain (GO:0022900);; Molecular Function: metal ion binding (GO:0046872);; Cellular Component: respiratory c…	K01412|0|sot:102606132|MPP; mitochondrial-processing peptidase subunit alpha-like; K01412 mitochondrial-processing peptidase subunit alpha [EC:3.4.24.64] (A)	--	[O]	Posttranslational modification, protein turnover, chaperones	Insulinase (Peptidase family M16);; Peptidase M16 inactive domain;; Peptidase M16 inactive domain;; Insulinase (Peptidase family M16)	Mitochondrial-processing peptidase subunit alpha (Precursor) GN=MPP OS=Solanum tuberosum (Potato) PE=1 SV=1	O	Posttranslational modification, protein turnover, chaperones	PREDICTED: mitochondrial-processing peptidase subunit alpha-like [Sesamum indicum]
F01_cb16516_c2/f1p0/1003	--	--	Molecular Function: cysteine synthase activity (GO:0004124);; Molecular Function: copper ion binding (GO:0005507);; Cellular Component: mitochondrion (GO:0005739);; Biological Process: cysteine biosynthetic process from serine (GO:0006535);; Cellular Component: chloroplast (GO:0009507);; Molecular Function: transferase activity (GO:0016740);; Molecular Function: L-3-cyanoalanine synthase activity…	K13034|3.0455e-139|vvi:100255091|bifunctional L-3-cyanoalanine synthase/cysteine synthase 1, mitochondrial; K13034 L-3-cyanoalanine synthase/ cysteine synthase [EC:2.5.1.47 4.4.1.9] (A)	ko00270:Cysteine and methionine metabolism;ko00460:Cyanoamino acid metabolism;ko00920:Sulfur metabolism;ko01200:Carbon metabolism;ko01230:Biosynthesis of amino acids	[E]	Amino acid transport and metabolism	Pyridoxal-phosphate dependent enzyme	Bifunctional L-3-cyanoalanine synthase/cysteine synthase 1, mitochondrial (Precursor) GN=PCAS-1 OS=Solanum tuberosum (Potato) PE=1 SV=1	E	Amino acid transport and metabolism	PREDICTED: bifunctional L-3-cyanoalanine synthase/cysteine synthase 1, mitochondrial [Sesamum indicum]
F01_cb18260_c3/f1p0/785	--	--	--	K18633|9.75807e-27|cit:102631144|mitotic-spindle organizing protein 1B-like; K18633 mitotic-spindle organizing protein 1 (A)	--	--	--	Mitotic-spindle organizing gamma-tubulin ring associated	Mitotic-spindle organizing protein 1B GN=T15G18.30 OS=Arabidopsis thaliana (Mouse-ear cress) PE=1 SV=1	O	Posttranslational modification, protein turnover, chaperones	unnamed protein product [Coffea canephora]
F01_cb22046_c1/f1p0/1076	--	--	--	--	--	--	--	--	--	S	Function unknown	PREDICTED: uncharacterized protein LOC105163261 [Sesamum indicum]
F02_cb702_c22/f1p0/4963	[O]	Posttranslational modification, protein turnover, chaperones	Biological Process: protein peptidyl-prolyl isomerization (GO:0000413);; Molecular Function: peptidyl-prolyl cis-trans isomerase activity (GO:0003755);; Biological Process: protein folding (GO:0006457);;	K09566|7.21328e-82|sly:543757|pi2; peptidyl-prolyl cis-trans isomerase CYP95; K09566 peptidyl-prolyl isomerase G (cyclophilin G) [EC:5.2.1.8] (A)	--	[R]	General function prediction only	Cyclophilin type peptidyl-prolyl cis-trans isomerase/CLD	Peptidyl-prolyl cis-trans isomerase CYP95 GN=F8B4.120 OS=Arabidopsis thaliana (Mouse-ear cress) PE=1 SV=2	S	Function unknown	PREDICTED: LOW QUALITY PROTEIN: uncharacterized protein LOC105117228 [Populus euphratica]
F01_cb7882_c54/f1p0/2833	--	--	--	--	--	--	--	--	--	--	--	PREDICTED: uncharacterized protein LOC104886349, partial [Beta vulgaris subsp. vulgaris]
F02_cb1936_c15/f1p0/3064	--	--	--	--	--	--	--	--	--	S	Function unknown	PREDICTED: uncharacterized protein LOC105164201 isoform X2 [Sesamum indicum]
F01_cb7865_c1/f1p0/1964	--	--	Molecular Function: oxidoreductase activity (GO:0016491);; Biological Process: oxidation-reduction process (GO:0055114);;	K13366|0|sly:101253022|polyamine oxidase 1; K13366 polyamine oxidase [EC:1.5.3.14 1.5.3.16 1.5.3.-] (A)	ko00330:Arginine and proline metabolism;ko00410:beta-Alanine metabolism	[Q]	Secondary metabolites biosynthesis, transport and catabolism	Flavin containing amine oxidoreductase;; NAD(P)-binding Rossmann-like domain;; FAD binding domain;; FAD dependent oxidoreductase;; Thi4 family;; FAD binding domain;; Flavin containing amine oxidoreductase;; Flavin containing amine oxidoreductase;; Flavin containing amine oxidoreductase	Polyamine oxidase 1 GN=MSH12.17 OS=Arabidopsis thaliana (Mouse-ear cress) PE=1 SV=1	S	Function unknown	PREDICTED: polyamine oxidase 1-like [Sesamum indicum]
F02_cb15290_c155/f6p0/490	[J]	Translation, ribosomal structure and biogenesis	Molecular Function: structural constituent of ribosome (GO:0003735);; Cellular Component: ribosome (GO:0005840);; Biological Process: translation (GO:0006412);;	K02921|7.47297e-59|pper:PRUPE_ppa013350mg|hypothetical protein; K02921 large subunit ribosomal protein L37Ae (A)	ko03010:Ribosome	[J]	Translation, ribosomal structure and biogenesis	Ribosomal L37ae protein family	60S ribosomal protein L37a-2 GN=RPL37AC OS=Arabidopsis thaliana (Mouse-ear cress) PE=3 SV=1	J	Translation, ribosomal structure and biogenesis	hypothetical protein PRUPE_ppa013350mg [Prunus persica]
F01_cb18479_c4/f1p0/1080	[KAD]	--	--	K09422|3.63543e-99|tcc:TCM_036404|Myb domain protein 3, putative; K09422 myb proto-oncogene protein, plant (A)	--	[K]	Transcription	Myb-like DNA-binding domain;; Myb-like DNA-binding domain	Myb-related protein 330 OS=Antirrhinum majus (Garden snapdragon) PE=2 SV=1	K	Transcription	PREDICTED: myb-related protein 330 [Sesamum indicum]
F01_cb16438_c17967/f1p0/3952	[RTKL]	--	--	--	--	[T]	Signal transduction mechanisms	Protein tyrosine kinase;; Protein kinase domain;; Carbohydrate-binding protein of the ER;; Di-glucose binding within endoplasmic reticulum;; Protein kinase domain;; Protein tyrosine kinase	Putative receptor-like protein kinase At5g39000 (Precursor) GN=At5g39000 OS=Arabidopsis thaliana (Mouse-ear cress) PE=3 SV=1	T	Signal transduction mechanisms	PREDICTED: putative receptor-like protein kinase At5g39000 [Sesamum indicum]
F01_cb13204_c3/f1p0/1601	--	--	Cellular Component: membrane (GO:0016020);;	--	--	--	--	EamA-like transporter family	WAT1-related protein At1g21890 GN=At1g21890 OS=Arabidopsis thaliana (Mouse-ear cress) PE=2 SV=1	S	Function unknown	PREDICTED: WAT1-related protein At1g44800-like [Sesamum indicum]
F01_cb10941_c13/f1p0/1722	--	--	Biological Process: formation of translation preinitiation complex (GO:0001731);; Molecular Function: translation initiation factor activity (GO:0003743);; Cellular Component: eukaryotic translation initiation factor 3 complex (GO:0005852);; Biological Process: regulation of translational initiation (GO:0006446);; Cellular Component: eukaryotic 43S preinitiation complex (GO:0016282);; Cellular Co…	K15029|0|cit:102620355|eukaryotic translation initiation factor 3 subunit L-like; K15029 translation initiation factor 3 subunit L (A)	--	[JK]	--	RNA polymerase I-associated factor PAF67;; RNA polymerase I-associated factor PAF67	--	J	Translation, ribosomal structure and biogenesis	PREDICTED: LOW QUALITY PROTEIN: eukaryotic translation initiation factor 3 subunit L-like [Sesamum indicum]
F01_cb10990_c3/f1p0/1791	--	--	--	--	--	[R]	General function prediction only	Rubisco LSMT substrate-binding;; SET domain	[Fructose-bisphosphate aldolase]-lysine N-methyltransferase, chloroplastic (Precursor) OS=Arabidopsis thaliana (Mouse-ear cress) PE=1 SV=1	S	Function unknown	PREDICTED: histone-lysine N-methyltransferase setd3 [Sesamum indicum]
F02_cb16713_c240/f1p0/1053	--	--	--	--	--	--	--	RNA dependent RNA polymerase	--	--	--	--
F01_cb8999_c3/f2p0/1123	--	--	Molecular Function: serine-type carboxypeptidase activity (GO:0004185);; Biological Process: proteolysis (GO:0006508);;	K16297|6.25413e-137|cic:CICLE_v10008112mg|hypothetical protein; K16297 serine carboxypeptidase-like clade II [EC:3.4.16.-] (A)	--	[OE]	--	Serine carboxypeptidase	Serine carboxypeptidase-like 29 (Precursor) OS=Arabidopsis thaliana (Mouse-ear cress) PE=2 SV=1	E	Amino acid transport and metabolism	PREDICTED: serine carboxypeptidase II-2 [Sesamum indicum]
F02_cb7340_c3/f1p0/4589	--	--	--	--	--	[R]	General function prediction only	Reverse transcriptase (RNA-dependent DNA polymerase);; zinc-binding in reverse transcriptase;; Reverse transcriptase (RNA-dependent DNA polymerase)	Putative ribonuclease H protein At1g65750 GN=At1g65750 OS=Arabidopsis thaliana (Mouse-ear cress) PE=3 SV=1	S	Function unknown	PREDICTED: uncharacterized protein LOC105180271 [Sesamum indicum]
F01_cb1419_c0/f1p0/3799	--	--	--	--	--	[KTDL]	--	BRCA1 C Terminus (BRCT) domain	--	S	Function unknown	PREDICTED: uncharacterized protein LOC105156929 [Sesamum indicum]
F02_cb1156_c3/f1p0/2789	--	--	--	--	--	--	--	--	--	U	Intracellular trafficking, secretion, and vesicular transport	PREDICTED: uncharacterized protein LOC105159805 [Sesamum indicum]
F01_cb16833_c0/f3p0/876	[R]	General function prediction only	Cellular Component: cytoplasm (GO:0005737);; Molecular Function: O-methyltransferase activity (GO:0008171);; Biological Process: anthocyanin-containing compound biosynthetic process (GO:0009718);; Biological Process: methylation (GO:0032259);; Biological Process: cyanidin 3-O-glucoside biosynthetic process (GO:0033485);; Biological Process: delphinidin 3-O-glucoside biosynthetic process (GO:00334…	K13272|3.88928e-120|vvi:100250567|flavonoid 3',5'-methyltransferase-like; K13272 flavonoid O-methyltransferase [EC:2.1.1.267] (A)	ko00944:Flavone and flavonol biosynthesis	[Q]	Secondary metabolites biosynthesis, transport and catabolism	O-methyltransferase;; Methyltransferase domain;; Methyltransferase domain	Flavonoid 3&apos;,5&apos;-methyltransferase GN=FAOMT OS=Vitis vinifera (Grape) PE=1 SV=1	S	Function unknown	PREDICTED: flavonoid 3&apos;,5&apos;-methyltransferase-like [Sesamum indicum]
F01_cb16438_c13172/f1p2/3513	[R]	General function prediction only	--	--	--	[R]	General function prediction only	WD domain, G-beta repeat;; WD domain, G-beta repeat	Topless-related protein 3 GN=TPR3 OS=Arabidopsis thaliana (Mouse-ear cress) PE=1 SV=1	S	Function unknown	PREDICTED: topless-related protein 3-like [Sesamum indicum]
F01_cb16438_c2628/f1p0/1792	[R]	General function prediction only	--	--	--	[O]	Posttranslational modification, protein turnover, chaperones	ATP-dependent protease La (LON) domain;; TPR repeat;; Ring finger domain;; Zinc finger, C3HC4 type (RING finger);; Zinc finger, C3HC4 type (RING finger);; Zinc finger, C3HC4 type (RING finger);; zinc-RING finger domain;; Tetratricopeptide repeat	Peroxisome biogenesis factor 10 GN=PEX10 OS=Arabidopsis thaliana (Mouse-ear cress) PE=1 SV=1	O	Posttranslational modification, protein turnover, chaperones	PREDICTED: LON peptidase N-terminal domain and RING finger protein 1 isoform X2 [Sesamum indicum]
F02_cb6429_c28/f1p0/2574	--	--	Cellular Component: cell wall (GO:0005618);; Cellular Component: plasmodesma (GO:0009506);; Cellular Component: intracellular part (GO:0044424);;	--	--	[P]	Inorganic ion transport and metabolism	--	--	S	Function unknown	PREDICTED: S-antigen protein-like [Sesamum indicum]
F02_cb11041_c54576/f1p0/2285	--	--	Cellular Component: integral component of membrane (GO:0016021);;	K17087|0|sot:102600734|transmembrane 9 superfamily member 3-like; K17087 transmembrane 9 superfamily member 3 (A)	--	[U]	Intracellular trafficking, secretion, and vesicular transport	Endomembrane protein 70;; Endomembrane protein 70	Transmembrane 9 superfamily member 1 {ECO:0000305} (Precursor) OS=Arabidopsis thaliana (Mouse-ear cress) PE=1 SV=1	S	Function unknown	PREDICTED: transmembrane 9 superfamily member 1 isoform X3 [Elaeis guineensis]
F01_cb3841_c31/f4p1/3496	--	--	--	--	--	[R]	General function prediction only	PPR repeat family;; PPR repeat;; Pentatricopeptide repeat domain;; PPR repeat;; DYW family of nucleic acid deaminases	Putative pentatricopeptide repeat-containing protein At3g49142 OS=Arabidopsis thaliana (Mouse-ear cress) PE=3 SV=1	S	Function unknown	PREDICTED: putative pentatricopeptide repeat-containing protein At3g49142 [Sesamum indicum]
F01_cb1833_c19/f1p0/3315	[RTKL]	--	--	--	--	--	--	Leucine Rich repeats (2 copies);; Leucine rich repeat;; Leucine Rich Repeat;; Leucine Rich repeat;; Leucine rich repeat N-terminal domain;; Leucine rich repeat;; Protein kinase domain;; Protein tyrosine kinase	Receptor-like protein kinase (Precursor) GN=INRPK1 OS=Ipomoea nil (Japanese morning glory) PE=2 SV=2	S	Function unknown	unnamed protein product [Triticum aestivum]
F01_cb12770_c5/f1p0/1623	[EH]	--	Biological Process: branched-chain amino acid metabolic process (GO:0009081);; Molecular Function: L-leucine transaminase activity (GO:0052654);; Molecular Function: L-valine transaminase activity (GO:0052655);; Molecular Function: L-isoleucine transaminase activity (GO:0052656);;	K00826|0|sly:101245812|branched-chain-amino-acid aminotransferase 5, chloroplastic-like; K00826 branched-chain amino acid aminotransferase [EC:2.6.1.42] (A)	ko00280:Valine, leucine and isoleucine degradation;ko00290:Valine, leucine and isoleucine biosynthesis;ko00770:Pantothenate and CoA biosynthesis;ko01210:2-Oxocarboxylic acid metabolism;ko01230:Biosynthesis of amino acids	[E]	Amino acid transport and metabolism	Aminotransferase class IV	Branched-chain-amino-acid aminotransferase 5, chloroplastic (Precursor) GN=BCAT5 OS=Arabidopsis thaliana (Mouse-ear cress) PE=1 SV=1	E	Amino acid transport and metabolism	hypothetical protein MIMGU_mgv1a007087mg [Erythranthe guttata]
F02_cb11041_c87481/f1p1/2077	--	--	--	--	--	--	--	--	--	S	Function unknown	PREDICTED: uncharacterized protein LOC105167077 [Sesamum indicum]
F02_cb3214_c3/f1p0/1498	--	--	Cellular Component: integral component of membrane (GO:0016021);;	--	--	[E]	Amino acid transport and metabolism	Transmembrane amino acid transporter protein;; Transmembrane amino acid transporter protein	Amino acid permease 6 GN=AAP6 OS=Arabidopsis thaliana (Mouse-ear cress) PE=1 SV=1	E	Amino acid transport and metabolism	PREDICTED: amino acid permease 6 [Sesamum indicum]
F01_cb1823_c9/f1p0/2992	[RTKL]	--	Molecular Function: protein kinase activity (GO:0004672);;	--	--	[T]	Signal transduction mechanisms	Protein tyrosine kinase;; Protein kinase domain	Proline-rich receptor-like protein kinase PERK10 GN=PERK10 OS=Arabidopsis thaliana (Mouse-ear cress) PE=2 SV=2	T	Signal transduction mechanisms	hypothetical protein MIMGU_mgv1a025530mg, partial [Erythranthe guttata]
F02_cb2744_c16/f1p0/2071	--	--	--	--	--	--	--	DENN (AEX-3) domain;; dDENN domain	DENN domain and WD repeat-containing protein SCD1 {ECO:0000305} OS=Arabidopsis thaliana (Mouse-ear cress) PE=1 SV=1	S	Function unknown	hypothetical protein MIMGU_mgv1a001758mg [Erythranthe guttata]
F02_cb557_c0/f1p0/4335	--	--	--	--	--	--	--	Agenet domain	--	S	Function unknown	PREDICTED: uncharacterized protein LOC105164342 isoform X1 [Sesamum indicum]
F01_cb11610_c2/f1p0/1807	--	--	--	--	--	--	--	--	--	--	--	hypothetical protein MIMGU_mgv1a024120mg, partial [Erythranthe guttata]
F02_cb5822_c20/f1p0/1616	[GEPR]	--	Molecular Function: transporter activity (GO:0005215);; Cellular Component: integral component of membrane (GO:0016021);; Biological Process: transmembrane transport (GO:0055085);;	--	--	[R]	General function prediction only	Major Facilitator Superfamily;; MFS/sugar transport protein	--	G	Carbohydrate transport and metabolism	PREDICTED: hippocampus abundant transcript-like protein 1 isoform X2 [Sesamum indicum]
F02_cb1775_c2/f1p0/3663	--	--	--	--	--	[D]	Cell cycle control, cell division, chromosome partitioning	Wings apart-like protein regulation of heterochromatin;; Wings apart-like protein regulation of heterochromatin	--	S	Function unknown	PREDICTED: uncharacterized protein LOC105167921 [Sesamum indicum]
F02_cb14129_c1/f1p0/2695	--	--	Molecular Function: binding (GO:0005488);;	K10395|9.88799e-51|sot:102588053|chromosome-associated kinesin KIF4-like; K10395 kinesin family member 4/21/27 (A)	--	[Z]	Cytoskeleton	--	--	Z	Cytoskeleton	PREDICTED: chromosome-associated kinesin KIF4A [Sesamum indicum]
F01_cb16438_c43181/f1p1/2700	[S]	Function unknown	--	--	--	[R]	General function prediction only	Leucine Rich repeats (2 copies);; Leucine rich repeat;; Leucine Rich Repeat;; Leucine Rich repeat;; Leucine rich repeat;; Leucine rich repeat N-terminal domain	Receptor-like protein 12 (Precursor) GN=RLP12 OS=Arabidopsis thaliana (Mouse-ear cress) PE=2 SV=2	S	Function unknown	Serine-threonine protein kinase [Theobroma cacao]
F02_cb2025_c33/f6p2/3369	[RTKL]	--	--	K04424|3.65907e-162|sly:101259865|serine/threonine-protein kinase EDR1; K04424 sterile alpha motif and leucine zipper containing kinase AZK [EC:2.7.11.25] (A)	--	[T]	Signal transduction mechanisms	Ethylene-responsive protein kinase Le-CTR1;; Protein tyrosine kinase;; Protein kinase domain	Serine/threonine-protein kinase EDR1 GN=F22O13.20 OS=Arabidopsis thaliana (Mouse-ear cress) PE=1 SV=1	T	Signal transduction mechanisms	PREDICTED: serine/threonine-protein kinase EDR1 [Sesamum indicum]
F01_cb16796_c6/f1p1/1220	[MG]	--	--	--	--	[V]	Defense mechanisms	NAD dependent epimerase/dehydratase family;; 3-beta hydroxysteroid dehydrogenase/isomerase family;; Male sterility protein;; NADH(P)-binding;; NmrA-like family;; KR domain	Vestitone reductase OS=Medicago sativa (Alfalfa) PE=1 SV=1	M	Cell wall/membrane/envelope biogenesis	hypothetical protein MIMGU_mgv1a009699mg [Erythranthe guttata]
F01_cb19682_c1751/f1p5/900	--	--	--	--	--	--	--	Dirigent-like protein	Dirigent protein 11 (Precursor) GN=DIR11 OS=Arabidopsis thaliana (Mouse-ear cress) PE=2 SV=1	S	Function unknown	PREDICTED: dirigent protein 22-like [Sesamum indicum]
F02_cb12003_c6/f1p0/2255	[I]	Lipid transport and metabolism	Molecular Function: lyase activity (GO:0016829);;	K05605|9.95375e-125|vvi:100261210|3-hydroxyisobutyryl-CoA hydrolase-like protein 3, mitochondrial; K05605 3-hydroxyisobutyryl-CoA hydrolase [EC:3.1.2.4] (A)	ko00280:Valine, leucine and isoleucine degradation;ko00410:beta-Alanine metabolism;ko00640:Propanoate metabolism;ko01200:Carbon metabolism	[I]	Lipid transport and metabolism	2-enoyl-CoA Hydratase C-terminal region;; Enoyl-CoA hydratase/isomerase family	3-hydroxyisobutyryl-CoA hydrolase-like protein 3, mitochondrial (Precursor) GN=At4g13360 OS=Arabidopsis thaliana (Mouse-ear cress) PE=2 SV=2	I	Lipid transport and metabolism	hypothetical protein MIMGU_mgv1a007270mg [Erythranthe guttata]
F02_cb8397_c3/f1p0/1704	--	--	--	--	--	--	--	Protein of unknown function (DUF3537)	--	S	Function unknown	PREDICTED: uncharacterized protein LOC105175311 [Sesamum indicum]
F02_cb4042_c1/f1p0/2982	--	--	--	--	--	[T]	Signal transduction mechanisms	NB-ARC domain;; AAA domain	Putative late blight resistance protein homolog R1B-17 GN=R1B-17 OS=Solanum demissum (Wild potato) PE=3 SV=1	S	Function unknown	hypothetical protein MIMGU_mgv1a023991mg [Erythranthe guttata]
F02_cb9572_c4/f1p2/2084	[O]	Posttranslational modification, protein turnover, chaperones	Molecular Function: ATP binding (GO:0005524);; Cellular Component: cell wall (GO:0005618);; Cellular Component: nucleolus (GO:0005730);; Cellular Component: plasma membrane (GO:0005886);; Biological Process: protein folding (GO:0006457);; Biological Process: response to heat (GO:0009408);; Biological Process: response to salt stress (GO:0009651);; Molecular Function: heat shock protein binding (G…	K09503|4.91409e-145|ppp:PHYPADRAFT_176453|hypothetical protein; K09503 DnaJ homolog subfamily A member 2 (A)	ko04141:Protein processing in endoplasmic reticulum	[O]	Posttranslational modification, protein turnover, chaperones	DnaJ domain;; DnaJ C terminal domain	DnaJ protein homolog (Precursor) GN=DNAJ1 OS=Cucumis sativus (Cucumber) PE=2 SV=1	O	Posttranslational modification, protein turnover, chaperones	predicted protein [Physcomitrella patens]
F02_cb1436_c13/f1p0/3211	[G]	Carbohydrate transport and metabolism	Molecular Function: alpha,alpha-trehalose-phosphate synthase (UDP-forming) activity (GO:0003825);; Molecular Function: trehalose-phosphatase activity (GO:0004805);; Biological Process: trehalose biosynthetic process (GO:0005992);;	K16055|0|tcc:TCM_010274|Trehalose-phosphatase/synthase 9; K16055 trehalose 6-phosphate synthase/phosphatase [EC:2.4.1.15 3.1.3.12] (A)	ko00500:Starch and sucrose metabolism	[G]	Carbohydrate transport and metabolism	Trehalose-phosphatase;; Glycosyltransferase family 20;; haloacid dehalogenase-like hydrolase;; Glycosyltransferase family 20;; Glycosyltransferase family 20	Probable alpha,alpha-trehalose-phosphate synthase [UDP-forming] 9 GN=TPS9 OS=Arabidopsis thaliana (Mouse-ear cress) PE=2 SV=1	G	Carbohydrate transport and metabolism	PREDICTED: probable alpha,alpha-trehalose-phosphate synthase [UDP-forming] 10 [Sesamum indicum]
F02_cb11041_c1571/f2p0/3944	--	--	Molecular Function: catalytic activity (GO:0003824);; Cellular Component: endosome (GO:0005768);; Cellular Component: Golgi apparatus (GO:0005794);; Cellular Component: trans-Golgi network (GO:0005802);; Biological Process: metabolic process (GO:0008152);; Cellular Component: membrane (GO:0016020);;	--	--	[GMW]	--	Exostosin family	Probable glucuronoxylan glucuronosyltransferase F8H GN=F8H OS=Arabidopsis thaliana (Mouse-ear cress) PE=2 SV=1	S	Function unknown	PREDICTED: probable glucuronosyltransferase Os03g0107900 [Sesamum indicum]
F02_cb7850_c8/f1p0/3335	[RTKL]	--	Molecular Function: protein serine/threonine kinase activity (GO:0004674);; Molecular Function: non-membrane spanning protein tyrosine kinase activity (GO:0004715);; Molecular Function: ATP binding (GO:0005524);; Biological Process: protein phosphorylation (GO:0006468);;	K13430|0|sot:102595931|serine/threonine-protein kinase PBS1-like; K13430 serine/threonine-protein kinase PBS1 [EC:2.7.11.1] (A)	ko04626:Plant-pathogen interaction	[T]	Signal transduction mechanisms	Protein kinase domain;; Protein tyrosine kinase	Serine/threonine-protein kinase PBS1 GN=PBS1 OS=Arabidopsis thaliana (Mouse-ear cress) PE=1 SV=1	T	Signal transduction mechanisms	PREDICTED: serine/threonine-protein kinase PBS1 [Sesamum indicum]
F01_cb11819_c2/f1p0/2863	--	--	--	K14948|4.29311e-154|sot:102602437|polypyrimidine tract-binding protein homolog 2-like; K14948 polypyrimidine tract-binding protein 2 (A)	--	[A]	RNA processing and modification	RNA recognition motif (a.k.a. RRM, RBD, or RNP domain);; RNA recognition motif. (a.k.a. RRM, RBD, or RNP domain);; RNA recognition motif. (a.k.a. RRM, RBD, or RNP domain);; RNA recognition motif. (a.k.a. RRM, RBD, or RNP domain)	Polypyrimidine tract-binding protein homolog 2 GN=At5g53180 OS=Arabidopsis thaliana (Mouse-ear cress) PE=1 SV=1	S	Function unknown	PREDICTED: polypyrimidine tract-binding protein homolog 2-like isoform X1 [Sesamum indicum]
F01_cb19700_c2/f2p0/1137	--	--	--	--	--	--	--	Domain of unknown function (DUF296)	Putative DNA-binding protein ESCAROLA GN=ESC OS=Arabidopsis thaliana (Mouse-ear cress) PE=2 SV=1	S	Function unknown	PREDICTED: putative DNA-binding protein ESCAROLA [Sesamum indicum]
F02_cb9899_c3/f1p0/1407	[G]	Carbohydrate transport and metabolism	--	--	--	[G]	Carbohydrate transport and metabolism	--	--	G	Carbohydrate transport and metabolism	hypothetical protein MIMGU_mgv1a009347mg [Erythranthe guttata]
F01_cb19693_c3/f3p0/1228	[I]	Lipid transport and metabolism	Molecular Function: carboxylic ester hydrolase activity (GO:0052689);;	--	--	[V]	Defense mechanisms	alpha/beta hydrolase fold	2-hydroxyisoflavanone dehydratase GN=HIDM OS=Glycyrrhiza echinata (Licorice) PE=1 SV=1	I	Lipid transport and metabolism	PREDICTED: 2-hydroxyisoflavanone dehydratase-like [Sesamum indicum]
F01_cb8031_c23/f1p0/1535	--	--	Biological Process: regulation of transcription, DNA-templated (GO:0006355);;	K14494|1.37888e-74|tcc:TCM_010965|GRAS family transcription factor family protein; K14494 DELLA protein (A)	ko04075:Plant hormone signal transduction	--	--	GRAS domain family	DELLA protein GAI1 GN=GAI1 OS=Vitis vinifera (Grape) PE=2 SV=1	K	Transcription	PREDICTED: DELLA protein GAI1 [Sesamum indicum]
F01_cb19218_c2/f1p0/594	--	--	--	--	--	--	--	Protein of unknown function (DUF4050)	--	S	Function unknown	PREDICTED: uncharacterized protein LOC105161355 [Sesamum indicum]
F01_cb16438_c33920/f1p0/3211	--	--	--	--	--	[T]	Signal transduction mechanisms	NB-ARC domain	Putative late blight resistance protein homolog R1B-17 GN=R1B-17 OS=Solanum demissum (Wild potato) PE=3 SV=1	S	Function unknown	hypothetical protein MIMGU_mgv1a024130mg [Erythranthe guttata]
F02_cb1368_c8/f1p0/3249	--	--	Molecular Function: GTPase activity (GO:0003924);; Molecular Function: GTP binding (GO:0005525);; Molecular Function: phospholipid binding (GO:0005543);; Biological Process: GTP catabolic process (GO:0006184);;	K01528|0|vvi:100245514|dynamin-2A; K01528 dynamin GTPase [EC:3.6.5.5] (A)	ko04144:Endocytosis	[UR]	--	Dynamin family;; Dynamin central region;; PH domain;; Dynamin GTPase effector domain;; 50S ribosome-binding GTPase	Dynamin-2B GN=T30E16.17 OS=Arabidopsis thaliana (Mouse-ear cress) PE=1 SV=2	S	Function unknown	PREDICTED: dynamin-2A-like [Sesamum indicum]
F02_cb10357_c20/f1p0/684	--	--	--	--	--	--	--	--	--	S	Function unknown	PREDICTED: uncharacterized protein LOC105161235 [Sesamum indicum]
F02_cb16453_c3/f1p0/691	--	--	Cellular Component: nucleolus (GO:0005730);; Biological Process: mitotic nuclear division (GO:0007067);; Biological Process: sex determination (GO:0007530);; Cellular Component: chloroplast (GO:0009507);; Biological Process: embryo development ending in seed dormancy (GO:0009793);; Biological Process: pollen tube guidance (GO:0010183);; Cellular Component: nuclear speck (GO:0016607);; Cellular Co…	K12877|2.33335e-98|tcc:TCM_005726|Mago nashi family protein; K12877 protein mago nashi (A)	ko03013:RNA transport;ko03015:mRNA surveillance pathway;ko03040:Spliceosome	[A]	RNA processing and modification	Mago nashi protein	Protein mago nashi homolog OS=Oryza sativa subsp. japonica (Rice) PE=2 SV=2	A	RNA processing and modification	hypothetical protein MIMGU_mgv1a015616mg [Erythranthe guttata]
F01_cb9697_c20/f1p0/1750	[P]	Inorganic ion transport and metabolism	Cellular Component: integral component of membrane (GO:0016021);; Biological Process: transmembrane transport (GO:0055085);;	K02575|0|rcu:RCOM_1355110|nitrate transporter, putative; K02575 MFS transporter, NNP family, nitrate/nitrite transporter (A)	ko00910:Nitrogen metabolism	--	--	--	High-affinity nitrate transporter 2.2 OS=Oryza sativa subsp. japonica (Rice) PE=1 SV=1	P	Inorganic ion transport and metabolism	PREDICTED: high affinity nitrate transporter 2.4-like [Sesamum indicum]
F01_cb5786_c23/f1p0/2608	[I]	Lipid transport and metabolism	Molecular Function: nucleotide binding (GO:0000166);; Molecular Function: 3-hydroxyacyl-CoA dehydrogenase activity (GO:0003857);; Molecular Function: enoyl-CoA hydratase activity (GO:0004300);; Cellular Component: cell wall (GO:0005618);; Cellular Component: nucleolus (GO:0005730);; Cellular Component: peroxisome (GO:0005777);; Biological Process: fatty acid beta-oxidation (GO:0006635);; Biologic…	K10527|0|sot:102579434|glyoxysomal fatty acid beta-oxidation multifunctional protein MFP-a-like; K10527 enoyl-CoA hydratase/3-hydroxyacyl-CoA dehydrogenase [EC:4.2.1.17 1.1.1.35 1.1.1.211] (A)	ko00071:Fatty acid degradation;ko00592:alpha-Linolenic acid metabolism;ko01212:Fatty acid metabolism	[I]	Lipid transport and metabolism	3-hydroxyacyl-CoA dehydrogenase, NAD binding domain;; Enoyl-CoA hydratase/isomerase family;; 3-hydroxyacyl-CoA dehydrogenase, C-terminal domain	3-hydroxyacyl-CoA dehydrogenase OS=Cucumis sativus (Cucumber) PE=1 SV=1	I	Lipid transport and metabolism	PREDICTED: glyoxysomal fatty acid beta-oxidation multifunctional protein MFP-a [Sesamum indicum]
F02_cb10787_c2/f1p1/1963	--	--	--	K16675|0|sly:101252481|protein S-acyltransferase 8; K16675 palmitoyltransferase ZDHHC9/14/18 [EC:2.3.1.225] (A)	--	[R]	General function prediction only	DHHC palmitoyltransferase	Protein S-acyltransferase 8 GN=PAT08 OS=Arabidopsis thaliana (Mouse-ear cress) PE=1 SV=2	S	Function unknown	PREDICTED: protein S-acyltransferase 8 [Sesamum indicum]
F02_cb4481_c2/f1p0/2516	--	--	--	--	--	--	--	--	--	S	Function unknown	PREDICTED: uncharacterized protein LOC105178309 [Sesamum indicum]
F01_cb2762_c6/f1p0/2321	--	--	--	--	--	[TZ]	--	LIM domain;; Protein of unknown function (DUF3633);; Protein of unknown function (DUF3633)	Protein DA1-related 1 GN=DAR1 OS=Arabidopsis thaliana (Mouse-ear cress) PE=1 SV=3	S	Function unknown	PREDICTED: protein DA1-like [Sesamum indicum]
F01_cb8079_c47/f1p1/1983	--	--	Cellular Component: cell part (GO:0044464);;	--	--	--	--	KRAB box	--	S	Function unknown	PREDICTED: uncharacterized protein LOC105160203 [Sesamum indicum]
F02_cb8322_c6/f1p0/1964	[F]	Nucleotide transport and metabolism	--	K00942|0|sly:101246321|guanylate kinase 2; K00942 guanylate kinase [EC:2.7.4.8] (A)	ko00230:Purine metabolism	[F]	Nucleotide transport and metabolism	Guanylate kinase;; AAA domain	Guanylate kinase 2 GN=T8H10.150 OS=Arabidopsis thaliana (Mouse-ear cress) PE=2 SV=1	F	Nucleotide transport and metabolism	PREDICTED: guanylate kinase 2-like [Sesamum indicum]
F01_cb9051_c5/f1p0/1831	--	--	Biological Process: polysaccharide biosynthetic process (GO:0000271);; Molecular Function: Rho guanyl-nucleotide exchange factor activity (GO:0005089);; Biological Process: pattern specification process (GO:0007389);; Biological Process: asymmetric cell division (GO:0008356);; Biological Process: regulation of cell size (GO:0008361);; Biological Process: multidimensional cell growth (GO:0009825);…	--	--	--	--	PRONE (Plant-specific Rop nucleotide exchanger);; PRONE (Plant-specific Rop nucleotide exchanger)	Rop guanine nucleotide exchange factor 1 GN=ROPGEF1 OS=Arabidopsis thaliana (Mouse-ear cress) PE=1 SV=2	--	--	hypothetical protein MIMGU_mgv1a003992mg [Erythranthe guttata]
F02_cb17523_c2/f1p0/705	[O]	Posttranslational modification, protein turnover, chaperones	Molecular Function: ubiquitin-protein transferase activity (GO:0004842);; Biological Process: ubiquitin-dependent protein catabolic process (GO:0006511);; Biological Process: UV protection (GO:0009650);; Biological Process: negative regulation of flower development (GO:0009910);; Biological Process: leaf morphogenesis (GO:0009965);; Biological Process: vegetative to reproductive phase transition …	K10573|1.72874e-99|bdi:100826690|ubiquitin-conjugating enzyme E2 2-like; K10573 ubiquitin-conjugating enzyme E2 A [EC:6.3.2.19] (A)	ko04120:Ubiquitin mediated proteolysis	[O]	Posttranslational modification, protein turnover, chaperones	Ubiquitin-conjugating enzyme;; Prokaryotic E2 family B	Ubiquitin-conjugating enzyme E2 2 GN=UBC2 OS=Medicago sativa (Alfalfa) PE=2 SV=1	O	Posttranslational modification, protein turnover, chaperones	PREDICTED: ubiquitin-conjugating enzyme E2 2-like isoform X1 [Brachypodium distachyon]
F02_cb86_c19/f1p1/2774	--	--	Molecular Function: DNA binding (GO:0003677);; Molecular Function: translation initiation factor activity (GO:0003743);; Cellular Component: nucleus (GO:0005634);; Cellular Component: cytoplasm (GO:0005737);; Biological Process: translational initiation (GO:0006413);; Biological Process: response to virus (GO:0009615);; Biological Process: RNA metabolic process (GO:0016070);; Biological Process: …	K03260|0|vvi:100260481|eukaryotic translation initiation factor isoform 4G-1; K03260 translation initiation factor 4G (A)	ko03013:RNA transport	[J]	Translation, ribosomal structure and biogenesis	MIF4G domain;; MA3 domain	Eukaryotic translation initiation factor isoform 4G-1 GN=EIF(ISO)4G1 OS=Arabidopsis thaliana (Mouse-ear cress) PE=1 SV=1	J	Translation, ribosomal structure and biogenesis	PREDICTED: eukaryotic translation initiation factor isoform 4G-1-like [Sesamum indicum]
F02_cb12946_c16/f1p0/1171	--	--	Biological Process: flavonoid biosynthetic process (GO:0009813);; Molecular Function: naringenin-chalcone synthase activity (GO:0016210);;	--	--	--	--	Chalcone and stilbene synthases, N-terminal domain;; Chalcone and stilbene synthases, C-terminal domain;; 3-Oxoacyl-[acyl-carrier-protein (ACP)] synthase III C terminal	Chalcone synthase GN=CHS OS=Perilla frutescens (Beefsteak mint) PE=2 SV=1	Q	Secondary metabolites biosynthesis, transport and catabolism	Chalcone synthase 6 [Glycine soja]
F02_cb16748_c1/f1p0/991	--	--	Molecular Function: zinc ion binding (GO:0008270);; Molecular Function: actin filament binding (GO:0051015);; Biological Process: actin filament bundle assembly (GO:0051017);;	K09377|1.18711e-121|sot:102588712|pollen-specific protein SF3-like; K09377 cysteine and glycine-rich protein (A)	--	[TZ]	--	LIM domain	LIM domain-containing protein WLIM2b {ECO:0000305} OS=Arabidopsis thaliana (Mouse-ear cress) PE=1 SV=1	Z	Cytoskeleton	PREDICTED: LIM domain-containing protein WLIM2b [Sesamum indicum]
F01_cb14905_c3/f2p1/709	--	--	--	--	--	--	--	Sel1 repeat	--	S	Function unknown	PREDICTED: uncharacterized protein LOC105174627 [Sesamum indicum]
F01_cb21647_c1/f1p0/1086	[R]	General function prediction only	Molecular Function: calmodulin binding (GO:0005516);;	K06911|2.23733e-156|pvu:PHAVU_008G274400g|hypothetical protein; K06911 (A)	--	--	--	Pirin C-terminal cupin domain;; Pirin	Pirin-like protein At1g50590 GN=At1g50590 OS=Arabidopsis thaliana (Mouse-ear cress) PE=2 SV=1	S	Function unknown	PREDICTED: pirin-like protein [Sesamum indicum]
F01_cb13717_c3/f1p0/1066	--	--	--	K10268|3.47461e-129|vvi:100257095|F-box protein SKIP1; K10268 F-box and leucine-rich repeat protein 2/20 (A)	--	[R]	General function prediction only	--	F-box protein SKIP1 GN=SKIP1 OS=Arabidopsis thaliana (Mouse-ear cress) PE=1 SV=1	S	Function unknown	PREDICTED: F-box protein SKIP1 [Sesamum indicum]
F02_cb11041_c143949/f1p0/1809	--	--	--	--	--	--	--	RNA dependent RNA polymerase;; Viral RNA-directed RNA-polymerase	--	--	--	--
F02_cb17068_c0/f1p0/1003	--	--	Molecular Function: protein serine/threonine kinase activity (GO:0004674);; Molecular Function: ATP binding (GO:0005524);; Biological Process: protein phosphorylation (GO:0006468);;	--	--	--	--	--	Cysteine-rich receptor-like protein kinase 3 (Precursor) GN=CRK3 OS=Arabidopsis thaliana (Mouse-ear cress) PE=2 SV=1	T	Signal transduction mechanisms	hypothetical protein PHAVU_002G063900g [Phaseolus vulgaris]
F01_cb16438_c2048/f1p0/2775	--	--	--	--	--	--	--	Formin Homology 2 Domain	Formin-like protein 3 OS=Oryza sativa subsp. japonica (Rice) PE=2 SV=2	S	Function unknown	PREDICTED: formin-like protein 14 [Sesamum indicum]
F02_cb2985_c4/f1p0/2617	--	--	--	--	--	--	--	Protein of unknown function (DUF3754)	--	S	Function unknown	PREDICTED: uncharacterized protein LOC105167185 isoform X1 [Sesamum indicum]
F02_cb15290_c747/f1p0/1109	--	--	--	--	--	[T]	Signal transduction mechanisms	BAG domain	BAG family molecular chaperone regulator 4 GN=BAG4 OS=Arabidopsis thaliana (Mouse-ear cress) PE=1 SV=1	O	Posttranslational modification, protein turnover, chaperones	PREDICTED: BAG family molecular chaperone regulator 4 [Sesamum indicum]
F02_cb3558_c27/f1p0/3047	--	--	Molecular Function: Rab GTPase activator activity (GO:0005097);; Biological Process: positive regulation of Rab GTPase activity (GO:0032851);;	--	--	[U]	Intracellular trafficking, secretion, and vesicular transport	Rab-GTPase-TBC domain;; Rab-GTPase-TBC domain	--	S	Function unknown	PREDICTED: ecotropic viral integration site 5 protein homolog [Sesamum indicum]
F01_cb22167_c1/f1p0/1455	--	--	--	--	--	--	--	Single-strand binding protein family	Protein OSB3, chloroplastic/mitochondrial (Precursor) GN=OSB3 OS=Arabidopsis thaliana (Mouse-ear cress) PE=2 SV=1	S	Function unknown	hypothetical protein L484_012560 [Morus notabilis]
F02_cb18620_c2/f1p0/1238	--	--	--	--	--	--	--	AP2 domain	Ethylene-responsive transcription factor-like protein At4g13040 GN=At4g13040 OS=Arabidopsis thaliana (Mouse-ear cress) PE=2 SV=2	K	Transcription	PREDICTED: ethylene-responsive transcription factor-like protein At4g13040 [Sesamum indicum]
F02_cb868_c24/f1p0/4975	--	--	Molecular Function: hydrolase activity, hydrolyzing O-glycosyl compounds (GO:0004553);; Biological Process: primary metabolic process (GO:0044238);; Cellular Component: cell part (GO:0044464);; Biological Process: organic substance metabolic process (GO:0071704);;	K01191|0|gmx:100798150|lysosomal alpha-mannosidase-like; K01191 alpha-mannosidase [EC:3.2.1.24] (A)	ko00511:Other glycan degradation	[G]	Carbohydrate transport and metabolism	Glycosyl hydrolases family 38 N-terminal domain;; Glycosyl hydrolases family 38 N-terminal domain;; Alpha mannosidase, middle domain;; Glycosyl hydrolases family 38 N-terminal domain	Alpha-mannosidase, light subunit {ECO:0000303|PubMed:24221485} OS=Canavalia ensiformis (Jack bean) PE=1 SV=1	G	Carbohydrate transport and metabolism	hypothetical protein MIMGU_mgv1a0008522mg, partial [Erythranthe guttata]
F02_cb11041_c58844/f1p0/3419	--	--	--	--	--	--	--	bHLH-MYC and R2R3-MYB transcription factors N-terminal	Transcription factor bHLH3 OS=Arabidopsis thaliana (Mouse-ear cress) PE=2 SV=1	K	Transcription	hypothetical protein MIMGU_mgv1a005352mg [Erythranthe guttata]
F02_cb5449_c16/f1p0/2509	[S]	Function unknown	Cellular Component: chloroplast thylakoid (GO:0009534);; Cellular Component: chloroplast envelope (GO:0009941);; Biological Process: regulation of proton transport (GO:0010155);; Biological Process: carotenoid biosynthetic process (GO:0016117);; Biological Process: carotene biosynthetic process (GO:0016120);; Molecular Function: phytoene dehydrogenase activity (GO:0016166);; Molecular Function: o…	K02293|0|vvi:100240685|PDS1; phytoene desaturase; K02293 15-cis-phytoene desaturase [EC:1.3.5.5] (A)	ko00906:Carotenoid biosynthesis	[Q]	Secondary metabolites biosynthesis, transport and catabolism	Flavin containing amine oxidoreductase;; NAD(P)-binding Rossmann-like domain;; FAD dependent oxidoreductase;; Pyridine nucleotide-disulphide oxidoreductase;; Pyridine nucleotide-disulphide oxidoreductase;; Thi4 family	Phytoene dehydrogenase, chloroplastic/chromoplastic (Precursor) GN=PDS OS=Solanum lycopersicum (Tomato) PE=2 SV=1	S	Function unknown	phytoene desaturase, partial [Pogostemon cablin]
F02_cb4217_c0/f2p0/2718	--	--	--	--	--	[TZ]	--	Formin Homology 2 Domain;; Formin Homology 2 Domain	Formin-like protein 8 (Precursor) GN=FH8 OS=Arabidopsis thaliana (Mouse-ear cress) PE=1 SV=1	U	Intracellular trafficking, secretion, and vesicular transport	PREDICTED: formin-like protein 4 [Sesamum indicum]
F02_cb19286_c0/f2p0/617	--	--	--	--	--	--	--	Dirigent-like protein	Dirigent protein 23 (Precursor) GN=DIR23 OS=Arabidopsis thaliana (Mouse-ear cress) PE=2 SV=1	U	Intracellular trafficking, secretion, and vesicular transport	PREDICTED: dirigent protein 22-like [Sesamum indicum]
F01_cb5523_c46/f1p2/2686	[HI]	--	Molecular Function: 1-deoxy-D-xylulose-5-phosphate synthase activity (GO:0008661);; Cellular Component: chloroplast (GO:0009507);; Biological Process: chlorophyll biosynthetic process (GO:0015995);; Biological Process: terpenoid biosynthetic process (GO:0016114);;	K01662|0|rcu:RCOM_0679170|1-deoxyxylulose-5-phosphate synthase, putative (EC:2.2.1.7); K01662 1-deoxy-D-xylulose-5-phosphate synthase [EC:2.2.1.7] (A)	ko00730:Thiamine metabolism;ko00900:Terpenoid backbone biosynthesis	[G]	Carbohydrate transport and metabolism	1-deoxy-D-xylulose-5-phosphate synthase;; Dehydrogenase E1 component;; Thiamine pyrophosphate enzyme, C-terminal TPP binding domain;; Transketolase, thiamine diphosphate binding domain;; Transketolase, pyrimidine binding domain;; Transketolase, C-terminal domain	1-deoxy-D-xylulose-5-phosphate synthase 1, chloroplastic (Precursor) OS=Oryza sativa subsp. japonica (Rice) PE=2 SV=2	H	Coenzyme transport and metabolism	deoxyxylulose synthase [Lavandula angustifolia]
F01_cb14939_c35/f1p0/1285	[O]	Posttranslational modification, protein turnover, chaperones	--	K00799|4.79424e-67|cit:102611781|glutathione S-transferase L3-like; K00799 glutathione S-transferase [EC:2.5.1.18] (A)	ko00480:Glutathione metabolism	[O]	Posttranslational modification, protein turnover, chaperones	--	Glutathione S-transferase L1 GN=GSTL1 OS=Arabidopsis thaliana (Mouse-ear cress) PE=2 SV=1	O	Posttranslational modification, protein turnover, chaperones	PREDICTED: glutathione S-transferase L3-like isoform X1 [Sesamum indicum]
F02_cb3570_c6/f1p0/3097	--	--	Molecular Function: ion channel activity (GO:0005216);; Biological Process: ion transport (GO:0006811);; Cellular Component: integral component of membrane (GO:0016021);; Biological Process: transmembrane transport (GO:0055085);;	K05391|0|sly:101267716|probable cyclic nucleotide-gated ion channel 5; K05391 cyclic nucleotide gated channel, other eukaryote (A)	ko04626:Plant-pathogen interaction	[PT]	--	Ion transport protein;; Cyclic nucleotide-binding domain	Probable cyclic nucleotide-gated ion channel 5 GN=CNGC5 OS=Arabidopsis thaliana (Mouse-ear cress) PE=2 SV=1	U	Intracellular trafficking, secretion, and vesicular transport	PREDICTED: probable cyclic nucleotide-gated ion channel 5 [Sesamum indicum]
F01_cb702_c14/f1p0/3551	--	--	--	--	--	[S]	Function unknown	U-box domain;; Zinc-finger of the MIZ type in Nse subunit;; Armadillo/beta-catenin-like repeat;; HEAT repeats;; HEAT repeat;; HEAT-like repeat;; Armadillo-like	U-box domain-containing protein 43 GN=PUB43 OS=Arabidopsis thaliana (Mouse-ear cress) PE=2 SV=1	S	Function unknown	hypothetical protein MIMGU_mgv1a000737mg [Erythranthe guttata]
F01_cb8870_c10/f1p1/1787	--	--	Molecular Function: DNA binding (GO:0003677);; Biological Process: response to stress (GO:0006950);;	K09419|3.23524e-90|rcu:RCOM_0539820|Heat shock factor protein, putative; K09419 heat shock transcription factor, other eukaryote (A)	--	[K]	Transcription	HSF-type DNA-binding	Heat stress transcription factor A-4b OS=Oryza sativa subsp. japonica (Rice) PE=2 SV=1	K	Transcription	PREDICTED: heat stress transcription factor A-4b-like [Sesamum indicum]
F02_cb14714_c1/f1p0/1239	--	--	--	--	--	--	--	--	Plastid division protein PDV1 GN=PDV1 OS=Arabidopsis thaliana (Mouse-ear cress) PE=1 SV=1	S	Function unknown	PREDICTED: plastid division protein PDV1 [Sesamum indicum]
F01_cb2682_c5/f1p0/3164	--	--	Molecular Function: nucleic acid binding (GO:0003676);;	--	--	--	--	Protein of unknown function (DUF 659);; BED zinc finger;; Aspartate carbamoyltransferase regulatory chain, metal binding domain;; hAT family C-terminal dimerisation region	--	S	Function unknown	hypothetical protein MIMGU_mgv1a001052mg [Erythranthe guttata]
F01_cb3942_c0/f2p0/3077	--	--	Biological Process: formation of translation preinitiation complex (GO:0001731);; Molecular Function: translation initiation factor activity (GO:0003743);; Cellular Component: eukaryotic translation initiation factor 3 complex (GO:0005852);; Biological Process: regulation of translational initiation (GO:0006446);; Cellular Component: eukaryotic 43S preinitiation complex (GO:0016282);; Molecular F…	K03252|0|vvi:100252123|eukaryotic translation initiation factor 3 subunit C; K03252 translation initiation factor 3 subunit C (A)	ko03013:RNA transport	[J]	Translation, ribosomal structure and biogenesis	Eukaryotic translation initiation factor 3 subunit 8 N-terminus;; PCI domain	Eukaryotic translation initiation factor 3 subunit C {ECO:0000255|HAMAP-Rule:MF_03002} GN=TIF3C1 OS=Arabidopsis thaliana (Mouse-ear cress) PE=1 SV=2	J	Translation, ribosomal structure and biogenesis	PREDICTED: eukaryotic translation initiation factor 3 subunit C [Vitis vinifera]
F01_cb2482_c29/f1p0/1821	[M]	Cell wall/membrane/envelope biogenesis	Molecular Function: UDP-glucose 6-dehydrogenase activity (GO:0003979);; Cellular Component: cell wall (GO:0005618);; Cellular Component: nucleus (GO:0005634);; Cellular Component: cytosol (GO:0005829);; Biological Process: UDP-glucuronate biosynthetic process (GO:0006065);; Molecular Function: NAD binding (GO:0051287);; Biological Process: oxidation-reduction process (GO:0055114);;	K00012|0|bdi:100840467|UDP-glucose 6-dehydrogenase 4-like; K00012 UDPglucose 6-dehydrogenase [EC:1.1.1.22] (A)	ko00040:Pentose and glucuronate interconversions;ko00053:Ascorbate and aldarate metabolism;ko00500:Starch and sucrose metabolism;ko00520:Amino sugar and nucleotide sugar metabolism	[GT]	--	UDP-glucose/GDP-mannose dehydrogenase family, NAD binding domain;; UDP-glucose/GDP-mannose dehydrogenase family, UDP binding domain;; UDP-glucose/GDP-mannose dehydrogenase family, central domain	UDP-glucose 6-dehydrogenase 4 GN=OsJ_35985 OS=Oryza sativa subsp. japonica (Rice) PE=2 SV=1	M	Cell wall/membrane/envelope biogenesis	PREDICTED: UDP-glucose 6-dehydrogenase 4-like [Brachypodium distachyon]
F01_cb15517_c1/f1p0/703	[O]	Posttranslational modification, protein turnover, chaperones	Cellular Component: cytoplasm (GO:0005737);; Biological Process: response to stress (GO:0006950);;	K13993|2.46662e-71|mtr:MTR_6g061940|18.2 kDa class I heat shock protein; K13993 HSP20 family protein (A)	ko04141:Protein processing in endoplasmic reticulum	[O]	Posttranslational modification, protein turnover, chaperones	Hsp20/alpha crystallin family	18.2 kDa class I heat shock protein GN=HSP18.2 OS=Medicago sativa (Alfalfa) PE=2 SV=1	O	Posttranslational modification, protein turnover, chaperones	HSP18.1B [Citrullus lanatus]
F01_cb343_c13/f1p1/4965	--	--	--	--	--	[K]	Transcription	Plus-3 domain;; GYF domain;; Zinc finger C-x8-C-x5-C-x3-H type (and similar)	Zinc finger CCCH domain-containing protein 19 GN=F16F14 OS=Arabidopsis thaliana (Mouse-ear cress) PE=1 SV=3	B	Chromatin structure and dynamics	PREDICTED: zinc finger CCCH domain-containing protein 44-like isoform X4 [Sesamum indicum]
F01_cb19682_c1185/f1p1/1323	[H]	Coenzyme transport and metabolism	Cellular Component: mitochondrion (GO:0005739);; Cellular Component: cytosol (GO:0005829);; Biological Process: cellular response to DNA damage stimulus (GO:0006974);; Molecular Function: zinc ion binding (GO:0008270);; Biological Process: thiamine biosynthetic process (GO:0009228);; Biological Process: response to cold (GO:0009409);; Cellular Component: chloroplast stroma (GO:0009570);; Cellular…	K03146|0|vvi:100265774|THI1-2; thiamine thiazole synthase 2, chloroplastic; K03146 thiamine thiazole synthase (A)	ko00730:Thiamine metabolism	[R]	General function prediction only	Thi4 family;; FAD dependent oxidoreductase;; FAD binding domain;; NAD(P)-binding Rossmann-like domain;; Pyridine nucleotide-disulphide oxidoreductase;; Lycopene cyclase protein;; GMC oxidoreductase	Thiamine thiazole synthase 2, chloroplastic {ECO:0000255|HAMAP-Rule:MF_03158} (Precursor) GN=VIT_10s0116g00530 OS=Vitis vinifera (Grape) PE=3 SV=1	H	Coenzyme transport and metabolism	PREDICTED: thiamine thiazole synthase 2, chloroplastic-like [Sesamum indicum]
F01_cb8595_c0/f7p0/2067	--	--	Biological Process: carbohydrate metabolic process (GO:0005975);; Molecular Function: hydrolase activity, acting on glycosyl bonds (GO:0016798);;	--	--	--	--	Glycosyl hydrolase family 14	Inactive beta-amylase 9 GN=T1A4.50 OS=Arabidopsis thaliana (Mouse-ear cress) PE=2 SV=1	S	Function unknown	PREDICTED: inactive beta-amylase 9 [Sesamum indicum]
F01_cb18587_c0/f5p0/1333	--	--	Biological Process: mitotic G2 phase (GO:0000085);; Biological Process: formation of translation preinitiation complex (GO:0001731);; Molecular Function: translation initiation factor activity (GO:0003743);; Cellular Component: cytosol (GO:0005829);; Cellular Component: eukaryotic translation initiation factor 3 complex (GO:0005852);; Biological Process: regulation of translational initiation (GO…	K03247|0|vvi:100248036|eukaryotic translation initiation factor 3 subunit H; K03247 translation initiation factor 3 subunit H (A)	ko03013:RNA transport	[J]	Translation, ribosomal structure and biogenesis	JAB1/Mov34/MPN/PAD-1 ubiquitin protease	Eukaryotic translation initiation factor 3 subunit H {ECO:0000255|HAMAP-Rule:MF_03007} GN=TIF3H1 OS=Arabidopsis thaliana (Mouse-ear cress) PE=1 SV=2	J	Translation, ribosomal structure and biogenesis	PREDICTED: eukaryotic translation initiation factor 3 subunit H [Sesamum indicum]
F02_cb10825_c13/f1p0/1848	[C]	Energy production and conversion	--	K00166|0|tcc:TCM_035303|Thiamin diphosphate-binding fold (THDP-binding) superfamily protein; K00166 2-oxoisovalerate dehydrogenase E1 component alpha subunit [EC:1.2.4.4] (A)	ko00280:Valine, leucine and isoleucine degradation	[C]	Energy production and conversion	Dehydrogenase E1 component;; Transketolase, thiamine diphosphate binding domain;; 1-deoxy-D-xylulose-5-phosphate synthase;; Thiamine pyrophosphate enzyme, C-terminal TPP binding domain	2-oxoisovalerate dehydrogenase subunit alpha 2, mitochondrial (Precursor) GN=At5g09300 OS=Arabidopsis thaliana (Mouse-ear cress) PE=1 SV=1	C	Energy production and conversion	PREDICTED: 2-oxoisovalerate dehydrogenase subunit alpha 1, mitochondrial isoform X1 [Sesamum indicum]
F02_cb18673_c5/f1p0/790	--	--	Cellular Component: mitochondrial proton-transporting ATP synthase complex, coupling factor F(o) (GO:0000276);; Molecular Function: hydrogen ion transmembrane transporter activity (GO:0015078);; Biological Process: ATP synthesis coupled proton transport (GO:0015986);;	K02140|9.22147e-45|pper:PRUPE_ppa013447mg|hypothetical protein; K02140 F-type H+-transporting ATPase subunit g (A)	ko00190:Oxidative phosphorylation	--	--	Mitochondrial ATP synthase g subunit	--	I	Lipid transport and metabolism	PREDICTED: uncharacterized protein LOC105161817 [Sesamum indicum]
F02_cb11041_c48529/f1p0/2417	--	--	Molecular Function: magnesium ion binding (GO:0000287);; Cellular Component: cytosol (GO:0005829);; Molecular Function: sesquiterpene synthase activity (GO:0010334);; Biological Process: terpenoid biosynthetic process (GO:0016114);; Biological Process: farnesyl diphosphate catabolic process (GO:0045339);; Biological Process: cadinene biosynthetic process (GO:1901928);; Biological Process: alpha-c…	--	--	--	--	Terpene synthase, N-terminal domain;; Terpene synthase family, metal binding domain;; Terpene synthase family, metal binding domain	Patchoulol synthase OS=Pogostemon cablin (Patchouli) PE=1 SV=1	S	Function unknown	patchoulol synthase variant 1 [Pogostemon cablin]
F01_cb4580_c3/f1p1/2227	[G]	Carbohydrate transport and metabolism	--	--	--	[R]	General function prediction only	Strictosidine synthase;; SMP-30/Gluconolaconase/LRE-like region	Protein STRICTOSIDINE SYNTHASE-LIKE 5 {ECO:0000303|PubMed:10777701} (Precursor) OS=Arabidopsis thaliana (Mouse-ear cress) PE=2 SV=1	G	Carbohydrate transport and metabolism	PREDICTED: protein STRICTOSIDINE SYNTHASE-LIKE 5-like [Sesamum indicum]
F01_cb7983_c12/f2p3/2123	[C]	Energy production and conversion	Biological Process: malate metabolic process (GO:0006108);; Molecular Function: malate dehydrogenase (decarboxylating) (NAD+) activity (GO:0016619);; Molecular Function: metal ion binding (GO:0046872);; Molecular Function: NAD binding (GO:0051287);; Biological Process: oxidation-reduction process (GO:0055114);;	K00029|0|rcu:RCOM_1049930|malic enzyme, putative (EC:1.1.1.40); K00029 malate dehydrogenase (oxaloacetate-decarboxylating)(NADP+) [EC:1.1.1.40] (A)	ko00620:Pyruvate metabolism;ko00710:Carbon fixation in photosynthetic organisms;ko01200:Carbon metabolism	[C]	Energy production and conversion	Malic enzyme, NAD binding domain;; Malic enzyme, N-terminal domain	NADP-dependent malic enzyme OS=Vitis vinifera (Grape) PE=2 SV=1	C	Energy production and conversion	PREDICTED: NADP-dependent malic enzyme [Sesamum indicum]
F02_cb13449_c4/f1p0/767	--	--	--	--	--	[S]	Function unknown	CHCH domain	--	S	Function unknown	PREDICTED: coiled-coil-helix-coiled-coil-helix domain-containing protein 10, mitochondrial [Sesamum indicum]
F02_cb11041_c85396/f1p0/1276	--	--	--	--	--	--	--	--	--	--	--	PREDICTED: uncharacterized protein LOC105171080 isoform X1 [Sesamum indicum]
F01_cb13309_c4/f1p0/1843	--	--	Biological Process: metal ion transport (GO:0030001);; Molecular Function: metal ion binding (GO:0046872);;	K07213|1.83548e-11|atr:s00040p00173680|AMTR_s00040p00173680; hypothetical protein; K07213 copper chaperone (A)	--	[P]	Inorganic ion transport and metabolism	--	Copper transport protein ATX1 GN=ATX1 OS=Arabidopsis thaliana (Mouse-ear cress) PE=1 SV=1	S	Function unknown	hypothetical protein MIMGU_mgv1a017040mg [Erythranthe guttata]
F01_cb12351_c2/f2p0/1755	[Q]	Secondary metabolites biosynthesis, transport and catabolism	Molecular Function: monooxygenase activity (GO:0004497);; Molecular Function: iron ion binding (GO:0005506);; Molecular Function: electron carrier activity (GO:0009055);; Molecular Function: oxidoreductase activity, acting on paired donors, with incorporation or reduction of molecular oxygen (GO:0016705);; Molecular Function: heme binding (GO:0020037);; Biological Process: oxidation-reduction pro…	--	--	[Q]	Secondary metabolites biosynthesis, transport and catabolism	Cytochrome P450	Geraniol 8-hydroxylase GN=CYP76B6 OS=Catharanthus roseus (Madagascar periwinkle) PE=1 SV=1	Q	Secondary metabolites biosynthesis, transport and catabolism	cytochrome P450 CYP76S7 [Salvia miltiorrhiza]
F01_cb13044_c387/f1p0/1445	--	--	--	--	--	--	--	Small coat protein;; Large coat protein	--	--	--	--
F02_cb10870_c1/f1p0/1582	--	--	--	--	--	--	--	--	--	S	Function unknown	PREDICTED: uncharacterized protein LOC105174809 [Sesamum indicum]
F02_cb4497_c5/f1p0/2713	--	--	Molecular Function: methyltransferase activity (GO:0008168);; Biological Process: methylation (GO:0032259);;	--	--	--	--	Putative S-adenosyl-L-methionine-dependent methyltransferase;; Methyltransferase domain;; Methyltransferase domain	Probable methyltransferase PMT11 GN=At2g39750 OS=Arabidopsis thaliana (Mouse-ear cress) PE=2 SV=1	S	Function unknown	PREDICTED: probable methyltransferase PMT11 [Sesamum indicum]
F02_cb8298_c42/f1p0/1869	[Q]	Secondary metabolites biosynthesis, transport and catabolism	Molecular Function: oxidoreductase activity (GO:0016491);; Molecular Function: metal ion binding (GO:0046872);;	--	--	[QI]	--	Cytochrome P450;; Cytochrome P450;; Cytochrome P450	Cytochrome P450 CYP72A219 OS=Panax ginseng (Korean ginseng) PE=2 SV=1	Q	Secondary metabolites biosynthesis, transport and catabolism	PREDICTED: cytochrome P450 CYP72A219-like [Sesamum indicum]
F01_cb7948_c14/f1p0/4399	--	--	--	--	--	[T]	Signal transduction mechanisms	RhoGAP domain;; P21-Rho-binding domain	Rho GTPase-activating protein 1 GN=ROPGAP1 OS=Arabidopsis thaliana (Mouse-ear cress) PE=2 SV=1	S	Function unknown	PREDICTED: rho GTPase-activating protein 5 [Sesamum indicum]
F01_cb17346_c0/f2p0/1573	--	--	--	--	--	[R]	General function prediction only	Putative serine esterase (DUF676)	--	S	Function unknown	PREDICTED: putative lipase YOR059C [Sesamum indicum]
F01_cb7589_c40/f1p3/1777	[G]	Carbohydrate transport and metabolism	Cellular Component: phosphopyruvate hydratase complex (GO:0000015);; Molecular Function: magnesium ion binding (GO:0000287);; Molecular Function: phosphopyruvate hydratase activity (GO:0004634);; Biological Process: glycolytic process (GO:0006096);;	K01689|0|sly:101247482|enolase-like; K01689 enolase [EC:4.2.1.11] (A)	ko00010:Glycolysis / Gluconeogenesis;ko01200:Carbon metabolism;ko01230:Biosynthesis of amino acids;ko03018:RNA degradation	[G]	Carbohydrate transport and metabolism	Enolase, C-terminal TIM barrel domain;; Enolase, N-terminal domain;; Methylaspartate ammonia-lyase C-terminus	Enolase GN=PGH1 OS=Solanum lycopersicum (Tomato) PE=2 SV=1	G	Carbohydrate transport and metabolism	PREDICTED: enolase [Sesamum indicum]
F02_cb18151_c1/f1p0/349	--	--	--	--	--	--	--	--	--	--	--	hypothetical protein M569_05430 [Genlisea aurea]
F02_cb16904_c6/f1p0/718	--	--	Biological Process: protein targeting (GO:0006605);; Molecular Function: P-P-bond-hydrolysis-driven protein transmembrane transporter activity (GO:0015450);; Cellular Component: membrane (GO:0016020);;	K07342|1.68009e-15|pop:POPTR_0001s33700g|POPTRDRAFT_1069216; hypothetical protein; K07342 protein transport protein SEC61 subunit gamma and related proteins (A)	ko03060:Protein export;ko04141:Protein processing in endoplasmic reticulum;ko04145:Phagosome	[U]	Intracellular trafficking, secretion, and vesicular transport	--	Protein transport protein Sec61 subunit gamma OS=Oryza sativa subsp. japonica (Rice) PE=3 SV=1	U	Intracellular trafficking, secretion, and vesicular transport	PREDICTED: protein transport protein Sec61 subunit gamma-1-like [Nicotiana tomentosiformis]
F01_cb14174_c1/f1p0/1940	[I]	Lipid transport and metabolism	Cellular Component: mitochondrion (GO:0005739);; Molecular Function: 2-C-methyl-D-erythritol 2,4-cyclodiphosphate synthase activity (GO:0008685);; Cellular Component: chloroplast stroma (GO:0009570);; Biological Process: chlorophyll biosynthetic process (GO:0015995);; Biological Process: carotenoid biosynthetic process (GO:0016117);;	K01770|7.09804e-40|sly:101246365|2-C-methyl-D-erythritol 2,4-cyclodiphosphate synthase, chloroplastic; K01770 2-C-methyl-D-erythritol 2,4-cyclodiphosphate synthase [EC:4.6.1.12] (A)	ko00900:Terpenoid backbone biosynthesis	--	--	YgbB family;; YgbB family	2-C-methyl-D-erythritol 2,4-cyclodiphosphate synthase, chloroplastic (Precursor) GN=ISPF OS=Catharanthus roseus (Madagascar periwinkle) PE=2 SV=1	I	Lipid transport and metabolism	2-C-methyl-D-erythritol 2,4-cyclodiphosphate synthase [Nicotiana langsdorffii x Nicotiana sanderae]
F02_cb17736_c0/f1p0/890	--	--	Biological Process: multicellular organismal development (GO:0007275);; Biological Process: single-organism cellular process (GO:0044763);; Biological Process: anatomical structure development (GO:0048856);;	--	--	--	--	Protein of unknown function (DUF3223)	Protein DCL, chloroplastic (Precursor) GN=DCL OS=Solanum lycopersicum (Tomato) PE=2 SV=1	S	Function unknown	hypothetical protein MIMGU_mgv1a013650mg [Erythranthe guttata]
F02_cb811_c4/f1p0/1483	[R]	General function prediction only	Biological Process: embryo development ending in seed dormancy (GO:0009793);; Biological Process: thylakoid membrane organization (GO:0010027);;	--	--	[R]	General function prediction only	Ankyrin repeat;; Ankyrin repeats (3 copies);; Ankyrin repeats (many copies);; Ankyrin repeats (many copies);; Ankyrin repeat	Ankyrin repeat domain-containing protein EMB506, chloroplastic (Precursor) GN=EMB506 OS=Arabidopsis thaliana (Mouse-ear cress) PE=1 SV=1	S	Function unknown	PREDICTED: ankyrin repeat domain-containing protein EMB506, chloroplastic [Sesamum indicum]
F02_cb11041_c123627/f1p1/1892	--	--	Biological Process: pseudouridine synthesis (GO:0001522);; Molecular Function: RNA binding (GO:0003723);; Molecular Function: pseudouridine synthase activity (GO:0009982);;	--	--	[R]	General function prediction only	YT521-B-like domain	30-kDa cleavage and polyadenylation specificity factor 30 {ECO:0000303|PubMed:18479511} OS=Arabidopsis thaliana (Mouse-ear cress) PE=1 SV=1	S	Function unknown	PREDICTED: uncharacterized protein LOC105169091 isoform X1 [Sesamum indicum]
F02_cb15096_c3/f1p1/774	--	--	--	--	--	--	--	--	--	--	--	PREDICTED: phosphopantothenoylcysteine decarboxylase subunit VHS3 [Sesamum indicum]
F01_cb1344_c4/f1p1/2090	--	--	--	--	--	[TU]	--	--	--	S	Function unknown	PREDICTED: epidermal growth factor receptor substrate 15-like [Sesamum indicum]
F02_cb11041_c991/f3p1/2030	[Q]	Secondary metabolites biosynthesis, transport and catabolism	Molecular Function: oxidoreductase activity (GO:0016491);; Molecular Function: metal ion binding (GO:0046872);;	--	--	[QI]	--	Cytochrome P450	Cytochrome P450 72A15 GN=CYP72A15 OS=Arabidopsis thaliana (Mouse-ear cress) PE=2 SV=1	Q	Secondary metabolites biosynthesis, transport and catabolism	unnamed protein product [Coffea canephora]
F01_cb36_c54/f78p2/1835	--	--	Molecular Function: aspartic-type endopeptidase activity (GO:0004190);; Cellular Component: vacuole (GO:0005773);; Cellular Component: cytosol (GO:0005829);; Biological Process: glycolytic process (GO:0006096);; Biological Process: proteolysis (GO:0006508);; Biological Process: protein targeting to vacuole (GO:0006623);; Biological Process: lipid metabolic process (GO:0006629);; Biological Proces…	K08245|0|pop:POPTR_0001s36700g|POPTRDRAFT_642209; aspartic protease family protein; K08245 phytepsin [EC:3.4.23.40] (A)	--	[O]	Posttranslational modification, protein turnover, chaperones	Eukaryotic aspartyl protease;; Saposin-like type B, region 1;; Saposin-like type B, region 2;; Xylanase inhibitor N-terminal	Aspartic proteinase A1 (Precursor) GN=F12F1.24 OS=Arabidopsis thaliana (Mouse-ear cress) PE=1 SV=1	O	Posttranslational modification, protein turnover, chaperones	PREDICTED: cyprosin-like [Sesamum indicum]
F01_cb13503_c3/f2p0/1383	[R]	General function prediction only	Molecular Function: nucleotide binding (GO:0000166);; Cellular Component: heterotrimeric G-protein complex (GO:0005834);; Cellular Component: Cul4-RING E3 ubiquitin ligase complex (GO:0080008);;	K12857|0|sot:102605588|U5 small nuclear ribonucleoprotein 40 kDa protein-like; K12857 Prp8 binding protein (A)	ko03040:Spliceosome	[A]	RNA processing and modification	WD domain, G-beta repeat;; Eukaryotic translation initiation factor eIF2A;; Nucleoporin Nup120/160	Dynein assembly factor with WDR repeat domains 1 GN=DAW1 OS=Chlamydomonas reinhardtii (Chlamydomonas smithii) PE=1 SV=1	S	Function unknown	PREDICTED: U5 small nuclear ribonucleoprotein 40 kDa protein [Sesamum indicum]
F02_cb7731_c2/f1p0/2328	[S]	Function unknown	Cellular Component: chloroplast envelope (GO:0009941);; Cellular Component: membrane (GO:0016020);;	--	--	[S]	Function unknown	Uncharacterized protein family UPF0016;; Uncharacterized protein family UPF0016	GDT1-like protein 2, chloroplastic (Precursor) GN=At4g13590 OS=Arabidopsis thaliana (Mouse-ear cress) PE=1 SV=2	S	Function unknown	PREDICTED: GDT1-like protein 2, chloroplastic [Sesamum indicum]
F02_cb1047_c4/f1p0/2477	--	--	--	K17601|0|pop:POPTR_0010s16310g|POPTRDRAFT_226070; hypothetical protein; K17601 WD repeat-containing protein 81 (A)	--	[TU]	--	--	--	S	Function unknown	PREDICTED: probable inactive serine/threonine-protein kinase lvsG isoform X3 [Sesamum indicum]
F01_cb12073_c8/f1p0/1649	--	--	--	--	--	[T]	Signal transduction mechanisms	RhoGAP domain	Uncharacterized Rho GTPase-activating protein At5g61530 GN=At5g61530 OS=Arabidopsis thaliana (Mouse-ear cress) PE=1 SV=2	S	Function unknown	PREDICTED: uncharacterized Rho GTPase-activating protein At5g61530-like isoform X2 [Sesamum indicum]
F01_cb16438_c42420/f1p0/1988	--	--	Cellular Component: plasma membrane (GO:0005886);; Biological Process: oligopeptide transport (GO:0006857);; Molecular Function: oligopeptide transporter activity (GO:0015198);; Biological Process: seed development (GO:0048316);; Molecular Function: iron-nicotianamine transmembrane transporter activity (GO:0051980);; Biological Process: transmembrane transport (GO:0055085);;	--	--	--	--	OPT oligopeptide transporter protein;; OPT oligopeptide transporter protein;; OPT oligopeptide transporter protein;; OPT oligopeptide transporter protein	Probable metal-nicotianamine transporter YSL5 GN=YSL5 OS=Arabidopsis thaliana (Mouse-ear cress) PE=1 SV=1	S	Function unknown	oligopeptide transporter, putative [Ricinus communis]
F01_cb15497_c7/f4p0/1130	[TZDR]	--	--	--	--	[T]	Signal transduction mechanisms	EF hand;; EF-hand domain pair;; EF hand;; EF-hand domain;; EF-hand domain pair;; Secreted protein acidic and rich in cysteine Ca binding region;; Cytoskeletal-regulatory complex EF hand	Calmodulin-like protein 3 GN=CML3 OS=Arabidopsis thaliana (Mouse-ear cress) PE=2 SV=1	DTZ	--	PREDICTED: calmodulin-like protein 3 [Sesamum indicum]
F02_cb14540_c1/f1p0/2307	[R]	General function prediction only	Molecular Function: GTP binding (GO:0005525);; Cellular Component: plasma membrane (GO:0005886);; Biological Process: small GTPase mediated signal transduction (GO:0007264);; Biological Process: determination of bilateral symmetry (GO:0009855);; Biological Process: polarity specification of adaxial/abaxial axis (GO:0009944);; Biological Process: meristem initiation (GO:0010014);; Biological Proce…	K07904|2.76176e-58|sly:101260861|ras-related protein RABA5b-like; K07904 Ras-related protein Rab-11A (A)	ko04144:Endocytosis	[U]	Intracellular trafficking, secretion, and vesicular transport	Ras family;; Miro-like protein;; ADP-ribosylation factor family;; 50S ribosome-binding GTPase;; Ras family	Ras-related protein RABA5b GN=RABA5B OS=Arabidopsis thaliana (Mouse-ear cress) PE=2 SV=1	S	Function unknown	PREDICTED: ras-related protein RABA5b [Sesamum indicum]
F01_cb19682_c1764/f1p0/655	--	--	--	--	--	--	--	Light regulated protein Lir1	Light-regulated protein (Precursor) OS=Oryza sativa subsp. japonica (Rice) PE=2 SV=1	S	Function unknown	PREDICTED: light-regulated protein-like [Sesamum indicum]
F01_cb10162_c2/f1p0/1749	[O]	Posttranslational modification, protein turnover, chaperones	--	K09518|1.49488e-152|sly:101261306|chaperone protein dnaJ 49; K09518 DnaJ homolog subfamily B member 12 (A)	ko04141:Protein processing in endoplasmic reticulum	[O]	Posttranslational modification, protein turnover, chaperones	DnaJ domain;; Domain of unknown function (DUF1977)	Chaperone protein dnaJ 49 OS=Arabidopsis thaliana (Mouse-ear cress) PE=2 SV=2	O	Posttranslational modification, protein turnover, chaperones	PREDICTED: chaperone protein dnaJ 49-like [Sesamum indicum]
F01_cb9724_c2/f1p0/2502	--	--	Cellular Component: integral component of membrane (GO:0016021);;	--	--	[TR]	--	TLC domain	--	U	Intracellular trafficking, secretion, and vesicular transport	PREDICTED: transmembrane protein 56-B [Nicotiana sylvestris]
F01_cb8206_c19/f1p0/2431	[R]	General function prediction only	Molecular Function: adenyl nucleotide binding (GO:0030554);;	--	--	--	--	CBS domain;; PB1 domain	CBS domain-containing protein CBSCBSPB3 GN=CBSCBSPB3 OS=Arabidopsis thaliana (Mouse-ear cress) PE=1 SV=1	S	Function unknown	hypothetical protein MIMGU_mgv1a004020mg [Erythranthe guttata]
F01_cb13809_c1/f1p0/1201	[J]	Translation, ribosomal structure and biogenesis	Molecular Function: rRNA (adenine-N6,N6-)-dimethyltransferase activity (GO:0000179);; Biological Process: cell fate specification (GO:0001708);; Cellular Component: nucleolus (GO:0005730);; Biological Process: rRNA methylation (GO:0031167);; Biological Process: cell division (GO:0051301);;	K14191|2.31338e-116|crb:CARUB_v10006757mg|hypothetical protein; K14191 18S rRNA (adenine1779-N6/adenine1780-N6)-dimethyltransferase [EC:2.1.1.183] (A)	--	[A]	RNA processing and modification	Ribosomal RNA adenine dimethylase;; Ribosomal RNA adenine dimethylase;; Methyltransferase domain;; Methyltransferase domain;; Methyltransferase domain	--	J	Translation, ribosomal structure and biogenesis	PREDICTED: probable dimethyladenosine transferase [Sesamum indicum]
F02_cb6414_c1/f1p0/2603	[E]	Amino acid transport and metabolism	Molecular Function: metalloendopeptidase activity (GO:0004222);; Cellular Component: mitochondrion (GO:0005739);; Cellular Component: cytosol (GO:0005829);; Biological Process: proteolysis (GO:0006508);; Cellular Component: chloroplast stroma (GO:0009570);; Biological Process: methylglyoxal catabolic process to D-lactate (GO:0019243);; Molecular Function: metal ion binding (GO:0046872);;	K01414|0|eus:EUTSA_v10003666mg|hypothetical protein; K01414 oligopeptidase A [EC:3.4.24.70] (A)	--	[O]	Posttranslational modification, protein turnover, chaperones	Peptidase family M3;; Peptidase family M3	Organellar oligopeptidase A, chloroplastic/mitochondrial (Precursor) GN=K21L13.14 OS=Arabidopsis thaliana (Mouse-ear cress) PE=1 SV=1	E	Amino acid transport and metabolism	PREDICTED: probable cytosolic oligopeptidase A [Tarenaya hassleriana]
F01_cb2790_c9/f1p0/3263	--	--	--	K12607|0|tcc:TCM_038150|Tetratricopeptide repeat-like superfamily protein; K12607 CCR4-NOT transcription complex subunit 10 (A)	ko03018:RNA degradation	[R]	General function prediction only	TPR repeat;; Tetratricopeptide repeat	--	K	Transcription	PREDICTED: CCR4-NOT transcription complex subunit 10 [Sesamum indicum]
F01_cb18034_c9/f1p0/1115	--	--	--	--	--	[O]	Posttranslational modification, protein turnover, chaperones	Xylanase inhibitor C-terminal	Basic 7S globulin low kDa subunit (Precursor) GN=BG OS=Glycine max (Soybean) PE=1 SV=2	O	Posttranslational modification, protein turnover, chaperones	PREDICTED: basic 7S globulin 2-like [Sesamum indicum]
F02_cb7260_c1/f1p0/2403	[R]	General function prediction only	Cellular Component: endoplasmic reticulum (GO:0005783);; Biological Process: ER to Golgi vesicle-mediated transport (GO:0006888);; Cellular Component: membrane (GO:0016020);; Biological Process: ER-associated ubiquitin-dependent protein catabolic process (GO:0030433);; Biological Process: hyperosmotic salinity response (GO:0042538);;	K14026|0|rcu:RCOM_0566120|hypothetical protein; K14026 SEL1 protein (A)	ko04141:Protein processing in endoplasmic reticulum	[MOT]	--	Sel1 repeat;; Tetratricopeptide repeat;; Sel1 repeat	ERAD-associated E3 ubiquitin-protein ligase component HRD3A {ECO:0000305} (Precursor) OS=Arabidopsis thaliana (Mouse-ear cress) PE=1 SV=1	S	Function unknown	PREDICTED: ERAD-associated E3 ubiquitin-protein ligase component HRD3A [Beta vulgaris subsp. vulgaris]
F02_cb16297_c0/f4p0/541	[S]	Function unknown	Cellular Component: integral component of membrane (GO:0016021);;	--	--	[R]	General function prediction only	Proteolipid membrane potential modulator	UPF0057 membrane protein At4g30660 GN=At4g30660 OS=Arabidopsis thaliana (Mouse-ear cress) PE=2 SV=1	S	Function unknown	PREDICTED: UPF0057 membrane protein At2g24040-like [Sesamum indicum]
F02_cb10102_c6/f2p0/1525	--	--	Biological Process: cellulose microfibril organization (GO:0010215);; Biological Process: cell growth (GO:0016049);; Cellular Component: anchored component of membrane (GO:0031225);;	--	--	--	--	COBRA-like protein	Protein COBRA (Precursor) GN=COB OS=Arabidopsis thaliana (Mouse-ear cress) PE=2 SV=1	S	Function unknown	PREDICTED: protein COBRA-like [Sesamum indicum]
F01_cb2015_c8/f1p0/2177	[RTKL]	--	Molecular Function: nucleotide binding (GO:0000166);; Molecular Function: protein kinase activity (GO:0004672);;	K18670|0|sot:102593889|uncharacterized LOC102593889; K18670 dual specificity protein kinase YAK1 [EC:2.7.12.1] (A)	--	[R]	General function prediction only	--	--	T	Signal transduction mechanisms	PREDICTED: uncharacterized protein LOC105160191 [Sesamum indicum]
F02_cb15073_c292/f1p1/613	--	--	Molecular Function: metal ion binding (GO:0046872);;	--	--	[P]	Inorganic ion transport and metabolism	Metallothionein	Metallothionein-like protein type 2 GN=MT1 OS=Malus domestica (Apple) PE=3 SV=1	S	Function unknown	hypothetical protein MIMGU_mgv1a017373mg [Erythranthe guttata]
F02_cb970_c6/f1p0/2243	[K]	Transcription	Molecular Function: DNA-directed RNA polymerase activity (GO:0003899);; Cellular Component: cytosol (GO:0005829);; Biological Process: transcription, DNA-templated (GO:0006351);; Cellular Component: chloroplast (GO:0009507);; Molecular Function: organic cyclic compound binding (GO:0097159);; Molecular Function: heterocyclic compound binding (GO:1901363);;	K03002|0|gmx:100812761|DNA-directed RNA polymerase I subunit RPA2-like; K03002 DNA-directed RNA polymerase I subunit RPA2 [EC:2.7.7.6] (A)	ko00230:Purine metabolism;ko00240:Pyrimidine metabolism;ko03020:RNA polymerase	[K]	Transcription	RNA polymerase Rpb2, domain 6;; RNA polymerase I, Rpa2 specific domain;; RNA polymerase Rpb2, domain 6;; RNA polymerase Rpb2, domain 7	DNA-directed RNA polymerase II subunit RPB2 GN=RPB2 OS=Solanum lycopersicum (Tomato) PE=2 SV=1	K	Transcription	PREDICTED: probable DNA-directed RNA polymerase I subunit RPA2 [Tarenaya hassleriana]
F01_cb298_c74/f1p1/2858	--	--	Molecular Function: sequence-specific DNA binding transcription factor activity (GO:0003700);; Cellular Component: nucleus (GO:0005634);; Biological Process: negative regulation of cell proliferation (GO:0008285);; Biological Process: auxin-activated signaling pathway (GO:0009734);; Biological Process: response to abscisic acid (GO:0009737);; Biological Process: positive regulation of flower deve…	--	--	--	--	Auxin response factor;; B3 DNA binding domain;; AUX/IAA family	Auxin response factor 2 GN=MTG10.3 OS=Arabidopsis thaliana (Mouse-ear cress) PE=1 SV=2	K	Transcription	PREDICTED: auxin response factor 2-like [Sesamum indicum]
F01_cb19848_c6/f1p0/1473	[RTKL]	--	Molecular Function: nucleotide binding (GO:0000166);; Molecular Function: protein kinase activity (GO:0004672);; Biological Process: phosphorylation (GO:0016310);;	--	--	--	--	Protein kinase domain;; Protein tyrosine kinase;; PAN-like domain	G-type lectin S-receptor-like serine/threonine-protein kinase At4g27290 (Precursor) GN=At4g27290 OS=Arabidopsis thaliana (Mouse-ear cress) PE=3 SV=4	T	Signal transduction mechanisms	PREDICTED: G-type lectin S-receptor-like serine/threonine-protein kinase At4g27290 isoform X2 [Nicotiana sylvestris]
F01_cb9979_c4/f1p0/1557	[R]	General function prediction only	Molecular Function: nucleotide binding (GO:0000166);; Cellular Component: heterotrimeric G-protein complex (GO:0005834);; Molecular Function: myosin heavy chain kinase activity (GO:0016905);; Cellular Component: Cul4-RING E3 ubiquitin ligase complex (GO:0080008);;	K14963|4.80625e-151|vvi:100249339|WD repeat-containing protein 5; K14963 COMPASS component SWD3 (A)	--	[R]	General function prediction only	WD domain, G-beta repeat;; Eukaryotic translation initiation factor eIF2A;; Nucleoporin Nup120/160	Protein Mut11 GN=Mut11 OS=Chlamydomonas reinhardtii (Chlamydomonas smithii) PE=2 SV=1	--	--	PREDICTED: WD repeat-containing protein 5 [Sesamum indicum]
F02_cb15143_c1/f1p0/919	[O]	Posttranslational modification, protein turnover, chaperones	Molecular Function: threonine-type endopeptidase activity (GO:0004298);; Cellular Component: nucleus (GO:0005634);; Cellular Component: cytoplasm (GO:0005737);; Biological Process: ubiquitin-dependent protein catabolic process (GO:0006511);; Cellular Component: proteasome core complex, alpha-subunit complex (GO:0019773);;	K02730|8.47369e-166|sot:102582717|proteasome subunit alpha type-6-like; K02730 20S proteasome subunit alpha 1 [EC:3.4.25.1] (A)	ko03050:Proteasome	[O]	Posttranslational modification, protein turnover, chaperones	Proteasome subunit;; Proteasome subunit A N-terminal signature	Proteasome subunit alpha type-6 GN=PAA1 OS=Nicotiana tabacum (Common tobacco) PE=1 SV=1	O	Posttranslational modification, protein turnover, chaperones	hypothetical protein MIMGU_mgv1a012555mg [Erythranthe guttata]
F01_cb9645_c4/f1p0/1863	[C]	Energy production and conversion	Molecular Function: dihydrolipoyllysine-residue acetyltransferase activity (GO:0004742);; Cellular Component: plasma membrane (GO:0005886);; Biological Process: acetyl-CoA metabolic process (GO:0006084);; Biological Process: embryo development ending in seed dormancy (GO:0009793);; Cellular Component: chloroplast envelope (GO:0009941);; Biological Process: sterol biosynthetic process (GO:0016126)…	K00627|0|sot:102589456|dihydrolipoyllysine-residue acetyltransferase component of pyruvate dehydrogenase complex, mitochondrial-like; K00627 pyruvate dehydrogenase E2 component (dihydrolipoamide acetyltransferase) [EC:2.3.1.12] (A)	ko00010:Glycolysis / Gluconeogenesis;ko00020:Citrate cycle (TCA cycle);ko00620:Pyruvate metabolism;ko01200:Carbon metabolism	[C]	Energy production and conversion	2-oxoacid dehydrogenases acyltransferase (catalytic domain);; Biotin-requiring enzyme;; e3 binding domain	Dihydrolipoyllysine-residue acetyltransferase component 5 of pyruvate dehydrogenase complex, chloroplastic (Precursor) OS=Arabidopsis thaliana (Mouse-ear cress) PE=2 SV=1	C	Energy production and conversion	PREDICTED: dihydrolipoyllysine-residue acetyltransferase component 5 of pyruvate dehydrogenase complex, chloroplastic [Sesamum indicum]
F01_cb1294_c2/f1p0/3843	[KL]	--	Molecular Function: DNA binding (GO:0003677);; Molecular Function: helicase activity (GO:0004386);; Molecular Function: ATP binding (GO:0005524);; Molecular Function: zinc ion binding (GO:0008270);; Molecular Function: transferase activity (GO:0016740);;	K15505|0|sot:102589663|putative SWI/SNF-related matrix-associated actin-dependent regulator of chromatin subfamily A member 3-like 2-like; K15505 DNA repair protein RAD5 [EC:3.6.4.-] (A)	--	[KL]	--	SNF2 family N-terminal domain;; Helicase conserved C-terminal domain;; HIRAN domain;; Zinc finger, C3HC4 type (RING finger);; Zinc finger, C3HC4 type (RING finger);; Ring finger domain;; Zinc finger, C3HC4 type (RING finger);; zinc-RING finger domain;; DEAD/DEAH box helicase	Putative SWI/SNF-related matrix-associated actin-dependent regulator of chromatin subfamily A member 3-like 2 GN=At5g22750 OS=Arabidopsis thaliana (Mouse-ear cress) PE=2 SV=1	L	Replication, recombination and repair	PREDICTED: putative SWI/SNF-related matrix-associated actin-dependent regulator of chromatin subfamily A member 3-like 2 isoform X3 [Sesamum indicum]
F01_cb13958_c4/f1p0/1549	--	--	Biological Process: transport (GO:0006810);; Cellular Component: integral component of membrane (GO:0016021);;	--	--	[I]	Lipid transport and metabolism	CRAL/TRIO domain;; CRAL/TRIO, N-terminal domain	Patellin-6 GN=PATL6 OS=Arabidopsis thaliana (Mouse-ear cress) PE=2 SV=1	S	Function unknown	PREDICTED: patellin-6-like [Sesamum indicum]
F01_cb4121_c96/f1p0/2270	--	--	Molecular Function: metal ion binding (GO:0046872);;	--	--	[R]	General function prediction only	Zinc finger C-x8-C-x5-C-x3-H type (and similar);; Zinc finger C-x8-C-x5-C-x3-H type (and similar)	Zinc finger CCCH domain-containing protein 32 GN=At2g47850 OS=Arabidopsis thaliana (Mouse-ear cress) PE=2 SV=2	S	Function unknown	PREDICTED: zinc finger CCCH domain-containing protein 34-like [Sesamum indicum]
F02_cb13462_c1/f2p1/1380	[M]	Cell wall/membrane/envelope biogenesis	Cellular Component: plasma membrane (GO:0005886);; Biological Process: lipid biosynthetic process (GO:0008610);;	--	--	--	--	Mycolic acid cyclopropane synthetase;; Methyltransferase domain;; Methyltransferase domain;; Methyltransferase domain;; Methyltransferase domain;; Methyltransferase domain;; Methyltransferase small domain;; Putative methyltransferase;; rRNA small subunit methyltransferase G;; Nodulation protein S (NodS);; Protein-L-isoaspartate(D-aspartate) O-methyltransferase (PCMT);; Tellurite resistance protei…	(S)-coclaurine N-methyltransferase OS=Thalictrum flavum subsp. glaucum (Yellow meadow rue) PE=1 SV=1	M	Cell wall/membrane/envelope biogenesis	PREDICTED: (S)-coclaurine N-methyltransferase isoform X1 [Sesamum indicum]
F02_cb2583_c3/f3p0/2198	--	--	--	--	--	[K]	Transcription	Bromodomain	Transcription factor GTE10 GN=K9H21.2/K9H21.3 OS=Arabidopsis thaliana (Mouse-ear cress) PE=1 SV=2	BK	--	PREDICTED: uncharacterized protein LOC105169093 [Sesamum indicum]
F01_cb10915_c3/f2p0/1935	[I]	Lipid transport and metabolism	Molecular Function: nucleotide binding (GO:0000166);; Molecular Function: enoyl-[acyl-carrier-protein] reductase (NADH) activity (GO:0004318);; Molecular Function: copper ion binding (GO:0005507);; Cellular Component: fatty acid synthase complex (GO:0005835);; Biological Process: acetyl-CoA metabolic process (GO:0006084);; Biological Process: fatty acid biosynthetic process (GO:0006633);; Biologi…	K00208|0|tcc:TCM_040401|NAD(P)-binding Rossmann-fold superfamily protein isoform 1; K00208 enoyl-[acyl-carrier protein] reductase I [EC:1.3.1.9 1.3.1.10] (A)	ko00061:Fatty acid biosynthesis;ko00780:Biotin metabolism;ko01212:Fatty acid metabolism	[R]	General function prediction only	Enoyl-(Acyl carrier protein) reductase	Enoyl-[acyl-carrier-protein] reductase [NADH], chloroplastic (Precursor) GN=T6P5.19 OS=Arabidopsis thaliana (Mouse-ear cress) PE=1 SV=1	I	Lipid transport and metabolism	PREDICTED: enoyl-[acyl-carrier-protein] reductase [NADH], chloroplastic-like, partial [Sesamum indicum]
F02_cb11041_c57343/f1p0/2553	--	--	Molecular Function: RNA binding (GO:0003723);;	K14844|5.69219e-11|pop:POPTR_0008s23200g|pumilio/Puf RNA-binding domain-containing family protein; K14844 pumilio homology domain family member 6 (A)	--	--	--	--	Pumilio homolog 24 GN=APUM24 OS=Arabidopsis thaliana (Mouse-ear cress) PE=2 SV=1	S	Function unknown	hypothetical protein M569_12862, partial [Genlisea aurea]
F02_cb11041_c49795/f1p0/2464	--	--	--	K14514|0|vvi:100250496|ETHYLENE INSENSITIVE 3-like 1 protein; K14514 ethylene-insensitive protein 3 (A)	ko04075:Plant hormone signal transduction	--	--	Ethylene insensitive 3	Protein ETHYLENE INSENSITIVE 3 GN=EIN3 OS=Arabidopsis thaliana (Mouse-ear cress) PE=1 SV=1	K	Transcription	PREDICTED: protein ETHYLENE INSENSITIVE 3-like [Sesamum indicum]
F01_cb7215_c48/f1p0/2204	--	--	Cellular Component: endosome (GO:0005768);; Cellular Component: trans-Golgi network (GO:0005802);; Molecular Function: methyltransferase activity (GO:0008168);; Biological Process: response to desiccation (GO:0009269);; Biological Process: response to cold (GO:0009409);; Biological Process: response to salt stress (GO:0009651);; Biological Process: response to abscisic acid (GO:0009737);; Biologi…	--	--	--	--	Putative S-adenosyl-L-methionine-dependent methyltransferase;; Methyltransferase domain	Probable methyltransferase PMT21 GN=ERD3 OS=Arabidopsis thaliana (Mouse-ear cress) PE=2 SV=1	S	Function unknown	hypothetical protein MIMGU_mgv1a003222mg [Erythranthe guttata]
F02_cb7362_c16/f1p0/2057	--	--	Molecular Function: zinc ion binding (GO:0008270);;	--	--	[A]	RNA processing and modification	RING-variant domain	Probable E3 ubiquitin ligase SUD1 GN=F28A23.140 OS=Arabidopsis thaliana (Mouse-ear cress) PE=1 SV=1	O	Posttranslational modification, protein turnover, chaperones	PREDICTED: uncharacterized protein LOC105170709 [Sesamum indicum]
F01_cb5383_c11/f1p0/2404	[RTKL]	--	Molecular Function: protein serine/threonine kinase activity (GO:0004674);; Molecular Function: ATP binding (GO:0005524);; Biological Process: protein phosphorylation (GO:0006468);;	--	--	[T]	Signal transduction mechanisms	Protein kinase domain;; Protein tyrosine kinase	Casein kinase I isoform delta-like GN=At4g26100 OS=Arabidopsis thaliana (Mouse-ear cress) PE=2 SV=2	T	Signal transduction mechanisms	PREDICTED: casein kinase I-like [Solanum lycopersicum]
F02_cb7299_c2/f1p0/2323	--	--	Molecular Function: nucleic acid binding (GO:0003676);; Molecular Function: zinc ion binding (GO:0008270);; Biological Process: positive regulation of cell proliferation (GO:0008284);;	K12819|0|csv:101230025|pre-mRNA-splicing factor SLU7-like; K12819 pre-mRNA-processing factor SLU7 (A)	ko03040:Spliceosome	[A]	RNA processing and modification	Pre-mRNA splicing Prp18-interacting factor	Pre-mRNA-splicing factor SLU7 OS=Oryza sativa subsp. japonica (Rice) PE=2 SV=1	A	RNA processing and modification	PREDICTED: pre-mRNA-splicing factor SLU7-like [Beta vulgaris subsp. vulgaris]
F01_cb2140_c58/f1p0/2391	[BK]	--	--	--	--	[K]	Transcription	Bromodomain	Transcription factor GTE7 GN=GTE7 OS=Arabidopsis thaliana (Mouse-ear cress) PE=2 SV=1	BK	--	PREDICTED: transcription factor GTE7-like [Sesamum indicum]
F01_cb428_c6/f1p1/3861	[RTKL]	--	Biological Process: regulation of protein phosphorylation (GO:0001932);; Molecular Function: protein kinase activity (GO:0004672);; Molecular Function: protein serine/threonine phosphatase activity (GO:0004722);; Molecular Function: ATP binding (GO:0005524);; Cellular Component: plasma membrane (GO:0005886);; Cellular Component: cAMP-dependent protein kinase complex (GO:0005952);; Biological Proc…	--	--	[T]	Signal transduction mechanisms	Protein phosphatase 2C;; Cyclic nucleotide-binding domain;; Protein kinase domain	Probable inactive cyclic nucleotide-dependent protein kinase At2g20050 GN=At2g20050/At2g20040 OS=Arabidopsis thaliana (Mouse-ear cress) PE=2 SV=2	T	Signal transduction mechanisms	PREDICTED: protein phosphatase 2C and cyclic nucleotide-binding/kinase domain-containing protein isoform X1 [Sesamum indicum]
F01_cb1218_c4/f1p0/2822	[T]	Signal transduction mechanisms	Cellular Component: integral component of membrane (GO:0016021);;	--	--	[U]	Intracellular trafficking, secretion, and vesicular transport	EXS family;; EXS family	Phosphate transporter PHO1 homolog 7 GN=PHO1-H7 OS=Arabidopsis thaliana (Mouse-ear cress) PE=2 SV=1	T	Signal transduction mechanisms	PREDICTED: SPX and EXS domain-containing protein 1-like [Sesamum indicum]
F02_cb1547_c8/f1p0/2227	--	--	--	--	--	--	--	--	--	S	Function unknown	PREDICTED: uncharacterized protein LOC105179152 isoform X1 [Sesamum indicum]
F01_cb10070_c7/f11p1/2171	--	--	Molecular Function: transporter activity (GO:0005215);; Cellular Component: membrane (GO:0016020);; Biological Process: transmembrane transport (GO:0055085);;	K14611|0|sly:101253471|nucleobase-ascorbate transporter 6; K14611 solute carrier family 23 (nucleobase transporter), member 1/2 (A)	--	[F]	Nucleotide transport and metabolism	Permease family	Nucleobase-ascorbate transporter 6 GN=NAT6 OS=Arabidopsis thaliana (Mouse-ear cress) PE=2 SV=2	F	Nucleotide transport and metabolism	PREDICTED: nucleobase-ascorbate transporter 6 [Sesamum indicum]
F01_cb1287_c38/f1p1/3441	[Z]	Cytoskeleton	Molecular Function: microtubule motor activity (GO:0003777);; Molecular Function: ATP binding (GO:0005524);; Cellular Component: kinesin complex (GO:0005871);; Cellular Component: microtubule (GO:0005874);; Biological Process: microtubule-based movement (GO:0007018);; Molecular Function: microtubule binding (GO:0008017);;	K11498|0|tcc:TCM_024960|P-loop containing nucleoside triphosphate hydrolases superfamily protein isoform 1; K11498 centromeric protein E (A)	--	[Z]	Cytoskeleton	Kinesin motor domain	Kinesin-like protein NACK1 GN=NACK1 OS=Nicotiana tabacum (Common tobacco) PE=1 SV=1	Z	Cytoskeleton	PREDICTED: osmotic avoidance abnormal protein 3-like [Sesamum indicum]
F01_cb12446_c6/f1p0/1592	[I]	Lipid transport and metabolism	Biological Process: MAPK cascade (GO:0000165);; Biological Process: response to superoxide (GO:0000303);; Biological Process: protein targeting to membrane (GO:0006612);; Biological Process: response to cold (GO:0009409);; Biological Process: response to water deprivation (GO:0009414);; Biological Process: response to auxin (GO:0009733);; Biological Process: abscisic acid-activated signaling path…	K14493|5.73302e-170|pper:PRUPE_ppa008128mg|hypothetical protein; K14493 gibberellin receptor GID1 [EC:3.-.-.-] (A)	ko04075:Plant hormone signal transduction	[V]	Defense mechanisms	alpha/beta hydrolase fold;; Carboxylesterase family	Gibberellin receptor GID1B GN=T20O10.110 OS=Arabidopsis thaliana (Mouse-ear cress) PE=1 SV=1	I	Lipid transport and metabolism	PREDICTED: gibberellin receptor GID1B-like [Sesamum indicum]
F01_cb21463_c0/f2p0/736	--	--	Molecular Function: metal ion binding (GO:0046872);;	K16281|9.27131e-72|sot:102588863|E3 ubiquitin-protein ligase RHA1B-like; K16281 RING-H2 zinc finger protein RHA1 (A)	--	[O]	Posttranslational modification, protein turnover, chaperones	Ring finger domain;; RING-H2 zinc finger;; Zinc finger, C3HC4 type (RING finger);; Zinc finger, C3HC4 type (RING finger)	E3 ubiquitin-protein ligase RHA1B GN=RHA1B OS=Arabidopsis thaliana (Mouse-ear cress) PE=2 SV=1	O	Posttranslational modification, protein turnover, chaperones	PREDICTED: E3 ubiquitin-protein ligase RHA1B-like [Sesamum indicum]
F02_cb6801_c3/f1p0/2344	[R]	General function prediction only	Molecular Function: acid phosphatase activity (GO:0003993);; Molecular Function: protein serine/threonine phosphatase activity (GO:0004722);; Biological Process: tryptophan catabolic process (GO:0006569);; Biological Process: systemic acquired resistance (GO:0009627);; Biological Process: indoleacetic acid biosynthetic process (GO:0009684);; Biological Process: regulation of defense response (GO:…	--	--	[G]	Carbohydrate transport and metabolism	Iron/zinc purple acid phosphatase-like protein C;; Calcineurin-like phosphoesterase;; Calcineurin-like phosphoesterase superfamily domain	Probable inactive purple acid phosphatase 1 (Precursor) GN=PAP1 OS=Arabidopsis thaliana (Mouse-ear cress) PE=2 SV=1	S	Function unknown	hypothetical protein MIMGU_mgv1a003064mg [Erythranthe guttata]
F01_cb21183_c2/f1p0/869	--	--	Cellular Component: extracellular region (GO:0005576);;	K08288|3.8503e-39|mtr:MTR_096s0015|Glucosidase 2 subunit beta; K08288 protein kinase C substrate 80K-H (A)	ko04141:Protein processing in endoplasmic reticulum	[T]	Signal transduction mechanisms	Glucosidase II beta subunit-like	Glucosidase 2 subunit beta (Precursor) GN=PSL4 OS=Arabidopsis thaliana (Mouse-ear cress) PE=2 SV=1	O	Posttranslational modification, protein turnover, chaperones	unnamed protein product [Coffea canephora]
F02_cb7252_c0/f1p0/2402	--	--	--	--	--	--	--	Protein of unknown function (DUF1084);; Protein of unknown function (DUF1084)	Tobamovirus multiplication protein 1 GN=TOM1 OS=Nicotiana tabacum (Common tobacco) PE=1 SV=1	S	Function unknown	PREDICTED: tobamovirus multiplication protein 1-like [Beta vulgaris subsp. vulgaris]
F02_cb11041_c57645/f1p0/3129	--	--	Molecular Function: ATP binding (GO:0005524);; Cellular Component: plasma membrane (GO:0005886);; Biological Process: ATP catabolic process (GO:0006200);; Biological Process: ATP biosynthetic process (GO:0006754);; Biological Process: cation transport (GO:0006812);; Molecular Function: hydrogen-exporting ATPase activity, phosphorylative mechanism (GO:0008553);; Biological Process: response to sal…	K01535|0|rcu:RCOM_0854050|H(\+)-transporting atpase plant/fungi plasma membrane type, putative (EC:3.6.3.6); K01535 H+-transporting ATPase [EC:3.6.3.6] (A)	ko00190:Oxidative phosphorylation	[P]	Inorganic ion transport and metabolism	haloacid dehalogenase-like hydrolase;; haloacid dehalogenase-like hydrolase;; haloacid dehalogenase-like hydrolase;; E1-E2 ATPase;; Cation transporter/ATPase, N-terminus;; Putative hydrolase of sodium-potassium ATPase alpha subunit	Plasma membrane ATPase 2 (Fragment) GN=LHA2 OS=Solanum lycopersicum (Tomato) PE=3 SV=1	P	Inorganic ion transport and metabolism	PREDICTED: plasma membrane ATPase 1-like [Sesamum indicum]
F02_cb18978_c0/f3p1/753	--	--	--	K08900|1.24933e-06|mdm:103426070|probable mitochondrial chaperone BCS1-B; K08900 mitochondrial chaperone BCS1 (A)	--	[O]	Posttranslational modification, protein turnover, chaperones	--	--	--	--	PREDICTED: probable mitochondrial chaperone BCS1-B [Sesamum indicum]
F01_cb2624_c2/f1p0/3019	[O]	Posttranslational modification, protein turnover, chaperones	Molecular Function: ATP binding (GO:0005524);; Biological Process: ATP catabolic process (GO:0006200);; Molecular Function: ATPase activity (GO:0016887);;	--	--	[O]	Posttranslational modification, protein turnover, chaperones	ATPase family associated with various cellular activities (AAA);; AAA domain;; Holliday junction DNA helicase ruvB N-terminus;; AAA domain (dynein-related subfamily)	Katanin p60 ATPase-containing subunit A1 {ECO:0000255|HAMAP-Rule:MF_03023} GN=At1g80350 OS=Arabidopsis thaliana (Mouse-ear cress) PE=1 SV=1	O	Posttranslational modification, protein turnover, chaperones	PREDICTED: nuclear valosin-containing protein-like [Sesamum indicum]
F02_cb11463_c2/f1p0/2050	[S]	Function unknown	--	--	--	[S]	Function unknown	Uncharacterised ACR, COG2135	--	S	Function unknown	PREDICTED: embryonic stem cell-specific 5-hydroxymethylcytosine-binding protein [Sesamum indicum]
F01_cb18359_c3/f1p0/1008	--	--	--	--	--	--	--	PsbP;; PsbP	PsbP-like protein 2, chloroplastic (Precursor) GN=F12L6.13 OS=Arabidopsis thaliana (Mouse-ear cress) PE=1 SV=2	S	Function unknown	PREDICTED: psbP-like protein 2, chloroplastic [Sesamum indicum]
F01_cb14163_c0/f3p0/1405	[K]	Transcription	Biological Process: maltose metabolic process (GO:0000023);; Molecular Function: plastid sigma factor activity (GO:0001053);; Molecular Function: DNA binding (GO:0003677);; Molecular Function: sequence-specific DNA binding transcription factor activity (GO:0003700);; Molecular Function: DNA-directed RNA polymerase activity (GO:0003899);; Biological Process: pentose-phosphate shunt (GO:0006098);; …	--	--	--	--	Sigma-70, region 4;; Sigma-70 region 3;; Sigma-70 region 2	RNA polymerase sigma factor sigD, chloroplastic (Precursor) GN=MSH12.20 OS=Arabidopsis thaliana (Mouse-ear cress) PE=2 SV=1	K	Transcription	PREDICTED: RNA polymerase sigma factor sigD, chloroplastic [Sesamum indicum]
F02_cb11041_c1749/f1p0/1544	--	--	Molecular Function: nucleotide binding (GO:0000166);; Molecular Function: nucleic acid binding (GO:0003676);; Biological Process: regulation of transcription, DNA-templated (GO:0006355);; Biological Process: posttranscriptional gene silencing by RNA (GO:0035194);; Biological Process: production of small RNA involved in gene silencing by RNA (GO:0070918);;	K11093|5.63357e-21|pop:POPTR_0007s12690g|POPTRDRAFT_219158; hypothetical protein; K11093 U1 small nuclear ribonucleoprotein 70kDa (A)	ko03040:Spliceosome	[A]	RNA processing and modification	--	U1 small nuclear ribonucleoprotein 70 kDa GN=RNU1 OS=Arabidopsis thaliana (Mouse-ear cress) PE=1 SV=1	S	Function unknown	PREDICTED: U1 small nuclear ribonucleoprotein 70 kDa [Nicotiana tomentosiformis]
F01_cb3982_c2/f1p1/2452	[O]	Posttranslational modification, protein turnover, chaperones	Biological Process: response to stress (GO:0006950);;	K09534|0|rcu:RCOM_0564980|heat shock protein binding protein, putative; K09534 DnaJ homolog subfamily C member 14 (A)	--	[O]	Posttranslational modification, protein turnover, chaperones	Cleavage inducing molecular chaperone;; DnaJ domain	Chaperone protein dnaJ 39 GN=T2K10.3 OS=Arabidopsis thaliana (Mouse-ear cress) PE=2 SV=2	O	Posttranslational modification, protein turnover, chaperones	PREDICTED: uncharacterized protein LOC105176538 [Sesamum indicum]
F02_cb3808_c86/f1p0/3713	--	--	--	--	--	[R]	General function prediction only	PPR repeat family;; PPR repeat;; PPR repeat;; Pentatricopeptide repeat domain;; Mitochondrial 28S ribosomal protein S27;; Anaphase-promoting complex, cyclosome, subunit 3;; Tetratricopeptide repeat;; Replication factor C C-terminal domain;; Tetratricopeptide repeat;; Region in Clathrin and VPS;; Tetratricopeptide repeat	Pentatricopeptide repeat-containing protein At5g64320, mitochondrial (Precursor) GN=At5g64320 OS=Arabidopsis thaliana (Mouse-ear cress) PE=2 SV=1	S	Function unknown	PREDICTED: pentatricopeptide repeat-containing protein At5g64320, mitochondrial [Sesamum indicum]
F01_cb12825_c1/f1p0/1645	[GEPR]	--	Molecular Function: sugar:proton symporter activity (GO:0005351);; Cellular Component: vacuolar membrane (GO:0005774);; Cellular Component: chloroplast (GO:0009507);; Cellular Component: integral component of membrane (GO:0016021);; Molecular Function: 2-alkenal reductase [NAD(P)] activity (GO:0032440);; Biological Process: carbohydrate transmembrane transport (GO:0034219);; Biological Process: o…	K08145|0|sot:102606346|sugar transporter ERD6-like 7-like; K08145 MFS transporter, SP family, solute carrier family 2 (facilitated glucose transporter), member 8 (A)	--	[R]	General function prediction only	Sugar (and other) transporter;; Major Facilitator Superfamily;; Sugar (and other) transporter	Sugar transporter ERD6-like 7 GN=At2g48020 OS=Arabidopsis thaliana (Mouse-ear cress) PE=2 SV=2	G	Carbohydrate transport and metabolism	PREDICTED: sugar transporter ERD6-like 7 [Sesamum indicum]
F02_cb11041_c88594/f1p0/1630	--	--	Molecular Function: structural molecule activity (GO:0005198);; Biological Process: response to stress (GO:0006950);; Cellular Component: chloroplast thylakoid membrane (GO:0009535);; Molecular Function: 2-alkenal reductase [NAD(P)] activity (GO:0032440);; Biological Process: oxidation-reduction process (GO:0055114);;	--	--	--	--	PAP_fibrillin;; PAP_fibrillin;; PAP_fibrillin	Plastid-lipid-associated protein, chloroplastic (Precursor) GN=PAP OS=Citrus unshiu (Satsuma mandarin) PE=2 SV=1	S	Function unknown	hypothetical protein MIMGU_mgv1a010099mg [Erythranthe guttata]
F01_cb5620_c2/f1p0/2635	[A]	RNA processing and modification	--	--	--	[K]	Transcription	Endonuclease/Exonuclease/phosphatase family;; Endonuclease/Exonuclease/phosphatase family	Carbon catabolite repressor protein 4 homolog 6 GN=CCR4-6 OS=Arabidopsis thaliana (Mouse-ear cress) PE=2 SV=2	A	RNA processing and modification	PREDICTED: LOW QUALITY PROTEIN: carbon catabolite repressor protein 4 homolog 6 [Sesamum indicum]
F01_cb3831_c9/f1p1/1868	--	--	Cellular Component: mitochondrial inner membrane (GO:0005743);; Biological Process: mitochondrial transport (GO:0006839);; Cellular Component: integral component of membrane (GO:0016021);; Cellular Component: chloroplast membrane (GO:0031969);; Biological Process: NAD transport (GO:0043132);; Molecular Function: NAD transporter activity (GO:0051724);; Biological Process: transmembrane transport (…	K15115|8.36233e-172|vvi:100258843|nicotinamide adenine dinucleotide transporter 1, chloroplastic; K15115 solute carrier family 25 (mitochondrial folate transporter), member 32 (A)	--	[C]	Energy production and conversion	Mitochondrial carrier protein	Nicotinamide adenine dinucleotide transporter 1, chloroplastic GN=T30B22.21 OS=Arabidopsis thaliana (Mouse-ear cress) PE=1 SV=2	S	Function unknown	hypothetical protein MIMGU_mgv1a010350mg [Erythranthe guttata]
F01_cb18799_c1/f1p0/1134	[P]	Inorganic ion transport and metabolism	Molecular Function: superoxide dismutase activity (GO:0004784);; Biological Process: superoxide metabolic process (GO:0006801);; Molecular Function: metal ion binding (GO:0046872);; Biological Process: oxidation-reduction process (GO:0055114);;	K04564|9.39395e-115|sly:101248277|superoxide dismutase [Fe], chloroplastic; K04564 superoxide dismutase, Fe-Mn family [EC:1.15.1.1] (A)	ko04146:Peroxisome	[P]	Inorganic ion transport and metabolism	Iron/manganese superoxide dismutases, alpha-hairpin domain;; Iron/manganese superoxide dismutases, C-terminal domain	Superoxide dismutase [Fe] 2, chloroplastic (Precursor) GN=MWD22.4 OS=Arabidopsis thaliana (Mouse-ear cress) PE=1 SV=1	P	Inorganic ion transport and metabolism	hypothetical protein MIMGU_mgv1a010591mg [Erythranthe guttata]
F02_cb4414_c0/f1p0/2904	--	--	--	K15501|0|vvi:100260305|serine/threonine-protein phosphatase 6 regulatory subunit 3; K15501 serine/threonine-protein phosphatase 6 regulatory subunit 3 (A)	--	[D]	Cell cycle control, cell division, chromosome partitioning	SIT4 phosphatase-associated protein;; SIT4 phosphatase-associated protein;; SIT4 phosphatase-associated protein	--	T	Signal transduction mechanisms	PREDICTED: serine/threonine-protein phosphatase 6 regulatory subunit 3 [Beta vulgaris subsp. vulgaris]
F02_cb11041_c16732/f1p0/2837	--	--	--	--	--	--	--	Large coat protein;; Small coat protein	--	--	--	--
F02_cb13800_c0/f3p1/1112	--	--	--	--	--	--	--	Lecithin retinol acyltransferase	--	S	Function unknown	PREDICTED: uncharacterized protein LOC105173988 [Sesamum indicum]
F01_cb10495_c6/f1p0/1036	--	--	Cellular Component: plasma membrane (GO:0005886);;	K12386|6.27355e-147|sly:101253846|cystinosin homolog; K12386 cystinosin (A)	--	[E]	Amino acid transport and metabolism	PQ loop repeat	Cystinosin homolog GN=At5g40670 OS=Arabidopsis thaliana (Mouse-ear cress) PE=2 SV=1	U	Intracellular trafficking, secretion, and vesicular transport	PREDICTED: cystinosin homolog isoform X2 [Sesamum indicum]
F02_cb14872_c1/f1p0/1384	[R]	General function prediction only	Biological Process: mitotic G2 phase (GO:0000085);; Cellular Component: nucleus (GO:0005634);; Cellular Component: cytosol (GO:0005829);; Biological Process: glycolytic process (GO:0006096);; Biological Process: N-terminal protein myristoylation (GO:0006499);; Biological Process: protein targeting to vacuole (GO:0006623);; Biological Process: fatty acid beta-oxidation (GO:0006635);; Biological Pr…	K03030|0|pop:POPTR_0002s12940g|POPTRDRAFT_816489; hypothetical protein; K03030 26S proteasome regulatory subunit N11 (A)	ko03050:Proteasome	[O]	Posttranslational modification, protein turnover, chaperones	JAB1/Mov34/MPN/PAD-1 ubiquitin protease;; Maintenance of mitochondrial structure and function;; Prokaryotic homologs of the JAB domain	26S proteasome non-ATPase regulatory subunit 14 homolog GN=RPN11 OS=Arabidopsis thaliana (Mouse-ear cress) PE=1 SV=1	S	Function unknown	hypothetical protein MIMGU_mgv1a008903mg [Erythranthe guttata]
F01_cb6674_c11/f1p0/1615	[R]	General function prediction only	--	K14411|5.51709e-46|sly:101254896|RNA-binding protein 1; K14411 RNA-binding protein Musashi (A)	ko03015:mRNA surveillance pathway	[R]	General function prediction only	--	RNA-binding protein 1 GN=F9K23.11 OS=Arabidopsis thaliana (Mouse-ear cress) PE=2 SV=1	S	Function unknown	PREDICTED: heterogeneous nuclear ribonucleoprotein 1-like [Sesamum indicum]
F02_cb8385_c2/f1p0/2234	[GO]	--	--	K14641|9.58826e-73|sly:101244629|	ko00230:Purine metabolism;ko00240:Pyrimidine metabolism	[F]	Nucleotide transport and metabolism	GDA1/CD39 (nucleoside phosphatase) family;; GDA1/CD39 (nucleoside phosphatase) family;; GDA1/CD39 (nucleoside phosphatase) family	Probable apyrase 1 GN=OSJNBb0014I10.10 OS=Oryza sativa subsp. japonica (Rice) PE=3 SV=1	GO	--	hypothetical protein MIMGU_mgv1a006675mg [Erythranthe guttata]
F02_cb1827_c10/f1p0/2663	[G]	Carbohydrate transport and metabolism	Molecular Function: hydrolase activity, hydrolyzing O-glycosyl compounds (GO:0004553);; Cellular Component: vacuole (GO:0005773);; Biological Process: carbohydrate metabolic process (GO:0005975);; Molecular Function: cation binding (GO:0043169);;	K18577|0|pop:POPTR_0013s02210g|POPTRDRAFT_570830; glycoside hydrolase family 2 family protein; K18577 mannosylglycoprotein endo-beta-mannosidase [EC:3.2.1.152] (A)	--	[G]	Carbohydrate transport and metabolism	Glycosyl hydrolases family 2, sugar binding domain	Mannosylglycoprotein endo-beta-mannosidase 42 kDa subunit GN=EBM OS=Lilium longiflorum (Trumpet lily) PE=1 SV=4	G	Carbohydrate transport and metabolism	glycoside hydrolase family 2 family protein [Populus trichocarpa]
F02_cb7969_c11/f1p0/1913	[C]	Energy production and conversion	Molecular Function: calcium ion binding (GO:0005509);; Cellular Component: mitochondrial inner membrane (GO:0005743);; Cellular Component: mitochondrial intermembrane space (GO:0005758);; Cellular Component: peroxisome (GO:0005777);; Molecular Function: oxidoreductase activity (GO:0016491);; Molecular Function: flavin adenine dinucleotide binding (GO:0050660);; Biological Process: oxidation-reduc…	K17871|0|sot:102591773|ndb1; external alternative NAD(P)H-ubiquinone oxidoreductase B1, mitochondrial-like (EC:1.6.5.9); K17871 NADH:ubiquinone reductase (non-electrogenic) [EC:1.6.5.9] (A)	--	[C]	Energy production and conversion	Pyridine nucleotide-disulphide oxidoreductase;; Pyridine nucleotide-disulphide oxidoreductase	External alternative NAD(P)H-ubiquinone oxidoreductase B1, mitochondrial (Precursor) GN=NDB1 OS=Solanum tuberosum (Potato) PE=1 SV=1	C	Energy production and conversion	PREDICTED: external alternative NAD(P)H-ubiquinone oxidoreductase B1, mitochondrial-like [Sesamum indicum]
F02_cb6338_c5/f1p0/2330	[RTKL]	--	--	--	--	[T]	Signal transduction mechanisms	Protein kinase domain;; Protein tyrosine kinase;; Wall-associated receptor kinase C-terminal;; Wall-associated receptor kinase galacturonan-binding	Probable serine/threonine-protein kinase At1g18390 (Precursor) GN=At1g18390 OS=Arabidopsis thaliana (Mouse-ear cress) PE=2 SV=2	T	Signal transduction mechanisms	PREDICTED: probable serine/threonine-protein kinase At1g18390 isoform X3 [Sesamum indicum]
F02_cb17931_c0/f3p1/578	--	--	Cellular Component: peroxisome (GO:0005777);; Biological Process: peroxisome organization (GO:0007031);; Biological Process: gibberellin biosynthetic process (GO:0009686);; Biological Process: gibberellic acid mediated signaling pathway (GO:0009740);; Biological Process: seed germination (GO:0009845);; Molecular Function: oxidoreductase activity (GO:0016491);; Biological Process: intracellular li…	--	--	[I]	Lipid transport and metabolism	SCP-2 sterol transfer family	--	S	Function unknown	PREDICTED: non-specific lipid-transfer protein-like [Sesamum indicum]
F01_cb9693_c2/f2p1/425	--	--	Molecular Function: oxidoreductase activity (GO:0016491);;	--	--	--	--	--	Transcription factor bHLH25 GN=T28I19.130 OS=Arabidopsis thaliana (Mouse-ear cress) PE=2 SV=2	--	--	PREDICTED: transcription factor bHLH18-like [Eucalyptus grandis]
F01_cb2639_c5/f1p0/2306	--	--	Molecular Function: protein serine/threonine phosphatase activity (GO:0004722);; Cellular Component: cytosol (GO:0005829);; Biological Process: metabolic process (GO:0008152);;	--	--	[T]	Signal transduction mechanisms	Protein phosphatase 2C	Probable protein phosphatase 2C 12 GN=At1g47380 OS=Arabidopsis thaliana (Mouse-ear cress) PE=2 SV=1	T	Signal transduction mechanisms	unnamed protein product [Coffea canephora]
F01_cb11874_c4/f1p0/1718	--	--	--	--	--	--	--	Weak chloroplast movement under blue light	WEB family protein At2g40480 GN=At2g40480 OS=Arabidopsis thaliana (Mouse-ear cress) PE=2 SV=1	S	Function unknown	PREDICTED: WEB family protein At2g38370-like isoform X2 [Sesamum indicum]
F01_cb8572_c2/f1p0/2315	--	--	--	--	--	[R]	General function prediction only	PPR repeat family;; PPR repeat;; PPR repeat;; Pentatricopeptide repeat domain;; Tetratricopeptide repeat;; Evolutionarily conserved signalling intermediate in Toll pathway;; Tetratricopeptide repeat;; PPR repeat	Pentatricopeptide repeat-containing protein At1g09820 GN=At1g09820 OS=Arabidopsis thaliana (Mouse-ear cress) PE=2 SV=1	S	Function unknown	PREDICTED: pentatricopeptide repeat-containing protein At1g09820 [Sesamum indicum]
F02_cb1655_c4/f1p0/3485	[J]	Translation, ribosomal structure and biogenesis	Molecular Function: translation elongation factor activity (GO:0003746);; Molecular Function: GTPase activity (GO:0003924);; Molecular Function: GTP binding (GO:0005525);; Biological Process: GTP catabolic process (GO:0006184);; Biological Process: translational elongation (GO:0006414);;	K14536|0|sly:101258526|elongation factor Tu GTP-binding domain-containing protein 1; K14536 ribosome assembly protein 1 [EC:3.6.5.-] (A)	ko03008:Ribosome biogenesis in eukaryotes	[J]	Translation, ribosomal structure and biogenesis	Elongation factor G C-terminus;; Elongation factor Tu domain 2;; Elongation Factor G, domain II;; Elongation factor Tu GTP binding domain	Elongation factor 2 OS=Parachlorella kessleri (Green alga) PE=2 SV=1	J	Translation, ribosomal structure and biogenesis	PREDICTED: elongation factor Tu GTP-binding domain-containing protein 1 isoform X1 [Sesamum indicum]
F01_cb6525_c2/f2p1/1635	--	--	Cellular Component: cell wall (GO:0005618);; Cellular Component: Golgi apparatus (GO:0005794);; Cellular Component: cytosol (GO:0005829);; Biological Process: glucose catabolic process (GO:0006007);; Molecular Function: glycogenin glucosyltransferase activity (GO:0008466);; Cellular Component: plasmodesma (GO:0009506);; Biological Process: response to salt stress (GO:0009651);; Biological Process…	K13379|0|gmx:100797033|probable UDP-arabinopyranose mutase 5-like; K13379 reversibly glycosylated polypeptide / UDP-arabinopyranose mutase [EC:2.4.1.- 5.4.99.30] (A)	--	--	--	Reversibly glycosylated polypeptide	Probable UDP-arabinopyranose mutase 5 GN=RGP5 OS=Arabidopsis thaliana (Mouse-ear cress) PE=1 SV=1	S	Function unknown	PREDICTED: probable UDP-arabinopyranose mutase 5 isoform X2 [Sesamum indicum]
F01_cb17601_c22/f1p0/1312	[P]	Inorganic ion transport and metabolism	Molecular Function: peroxidase activity (GO:0004601);; Biological Process: response to oxidative stress (GO:0006979);; Molecular Function: heme binding (GO:0020037);; Molecular Function: metal ion binding (GO:0046872);; Biological Process: oxidation-reduction process (GO:0055114);;	K00430|0|sot:102596217|peroxidase 42-like; K00430 peroxidase [EC:1.11.1.7] (A)	ko00360:Phenylalanine metabolism;ko00940:Phenylpropanoid biosynthesis	--	--	Peroxidase	Peroxidase 42 (Precursor) OS=Arabidopsis thaliana (Mouse-ear cress) PE=1 SV=2	G	Carbohydrate transport and metabolism	PREDICTED: peroxidase 42-like [Sesamum indicum]
F01_cb18755_c19/f1p0/2401	--	--	--	--	--	[R]	General function prediction only	MraW methylase family;; MraW methylase family	--	M	Cell wall/membrane/envelope biogenesis	PREDICTED: probable methyltransferase-like protein 15 [Sesamum indicum]
F01_cb15307_c4/f2p0/750	--	--	Molecular Function: structural constituent of ribosome (GO:0003735);; Cellular Component: ribosome (GO:0005840);; Biological Process: translation (GO:0006412);;	K02993|1.45677e-118|rcu:RCOM_1198120|40S ribosomal protein S7, putative; K02993 small subunit ribosomal protein S7e (A)	ko03010:Ribosome	[J]	Translation, ribosomal structure and biogenesis	Ribosomal protein S7e	40S ribosomal protein S7 GN=RPS7 OS=Avicennia marina (Grey mangrove) PE=2 SV=1	J	Translation, ribosomal structure and biogenesis	PREDICTED: 40S ribosomal protein S7 [Sesamum indicum]
F02_cb11041_c1860/f1p0/2143	--	--	Molecular Function: ATP binding (GO:0005524);; Biological Process: protein folding (GO:0006457);; Biological Process: response to stress (GO:0006950);; Molecular Function: unfolded protein binding (GO:0051082);;	K04079|0|mtr:MTR_1g099840|Heat shock protein; K04079 molecular chaperone HtpG (A)	ko04141:Protein processing in endoplasmic reticulum;ko04626:Plant-pathogen interaction	[O]	Posttranslational modification, protein turnover, chaperones	Hsp90 protein;; Hsp90 protein;; Histidine kinase-, DNA gyrase B-, and HSP90-like ATPase;; Histidine kinase-, DNA gyrase B-, and HSP90-like ATPase;; Hsp90 protein	Heat shock protein 81-1 OS=Oryza sativa subsp. japonica (Rice) PE=3 SV=2	O	Posttranslational modification, protein turnover, chaperones	hypothetical protein Csa_1G569290 [Cucumis sativus]
F02_cb15072_c8/f1p0/1012	--	--	--	--	--	--	--	Hydrophobic seed protein;; Probable lipid transfer;; Protease inhibitor/seed storage/LTP family	36.4 kDa proline-rich protein GN=TPRP-F1 OS=Solanum lycopersicum (Tomato) PE=2 SV=1	S	Function unknown	protease inhibitor/seed storage/LTP family protein [Arabidopsis thaliana]
F02_cb11041_c40245/f1p0/2567	[RTKL]	--	Molecular Function: protein serine/threonine kinase activity (GO:0004674);; Molecular Function: ATP binding (GO:0005524);; Biological Process: protein phosphorylation (GO:0006468);; Cellular Component: integral component of membrane (GO:0016021);;	K13418|0|sly:100736530|SERK1; somatic embryogenesis receptor kinase 1; K13418 somatic embryogenesis receptor kinase 1 [EC:2.7.10.1 2.7.11.1] (A)	--	--	--	Protein kinase domain;; Protein tyrosine kinase;; Leucine Rich repeats (2 copies);; Leucine rich repeat N-terminal domain;; Leucine rich repeat;; Leucine Rich Repeat;; Leucine Rich repeat;; Leucine rich repeat;; Phosphotransferase enzyme family	Somatic embryogenesis receptor kinase 2 (Precursor) GN=SERK2 OS=Arabidopsis thaliana (Mouse-ear cress) PE=1 SV=1	T	Signal transduction mechanisms	hypothetical protein MIMGU_mgv1a002850mg [Erythranthe guttata]
F01_cb16438_c1886/f1p0/2378	[KL]	--	Molecular Function: DNA binding (GO:0003677);; Molecular Function: helicase activity (GO:0004386);; Molecular Function: ATP binding (GO:0005524);; Cellular Component: nucleus (GO:0005634);; Molecular Function: transferase activity (GO:0016740);; Molecular Function: nucleosome binding (GO:0031491);; Biological Process: ATP-dependent chromatin remodeling (GO:0043044);;	K11654|0|gmx:100809750|putative chromatin-remodeling complex ATPase chain-like; K11654 SWI/SNF-related matrix-associated actin-dependent regulator of chromatin subfamily A member 5 [EC:3.6.4.-] (A)	--	[K]	Transcription	SLIDE;; Helicase conserved C-terminal domain;; HAND;; Myb-like DNA-binding domain;; SNF2 family N-terminal domain	Putative chromatin-remodeling complex ATPase chain GN=At3g06400 OS=Arabidopsis thaliana (Mouse-ear cress) PE=2 SV=3	L	Replication, recombination and repair	PREDICTED: putative chromatin-remodeling complex ATPase chain-like isoform 1 [Glycine max]
F01_cb3480_c3/f3p0/2375	[R]	General function prediction only	--	--	--	[R]	General function prediction only	Alpha/beta hydrolase family;; Alpha/beta hydrolase family;; Acetyl xylan esterase (AXE1)	--	S	Function unknown	hypothetical protein MIMGU_mgv1a005188mg [Erythranthe guttata]
F01_cb8981_c5/f1p0/1859	[J]	Translation, ribosomal structure and biogenesis	Biological Process: translation (GO:0006412);; Biological Process: plastid organization (GO:0009657);; Biological Process: small molecule metabolic process (GO:0044281);;	K02838|4.67665e-48|sot:102588362|ribosome-recycling factor, chloroplastic-like; K02838 ribosome recycling factor (A)	--	[J]	Translation, ribosomal structure and biogenesis	Ribosome recycling factor;; Ribosome recycling factor	Ribosome-recycling factor, chloroplastic (Precursor) GN=RRF OS=Spinacia oleracea (Spinach) PE=1 SV=1	J	Translation, ribosomal structure and biogenesis	PREDICTED: ribosome-recycling factor, chloroplastic [Sesamum indicum]
F02_cb3581_c0/f3p0/2298	[V]	Defense mechanisms	Molecular Function: ATP binding (GO:0005524);; Biological Process: ATP catabolic process (GO:0006200);; Molecular Function: ferric-transporting ATPase activity (GO:0015408);; Cellular Component: membrane (GO:0016020);;	--	--	[Q]	Secondary metabolites biosynthesis, transport and catabolism	ABC-2 type transporter;; ABC transporter;; AAA domain;; AAA domain	ABC transporter G family member 5 GN=T10F5.15 OS=Arabidopsis thaliana (Mouse-ear cress) PE=2 SV=1	V	Defense mechanisms	hypothetical protein MIMGU_mgv1a024795mg [Erythranthe guttata]
F02_cb9822_c5/f1p0/1881	[R]	General function prediction only	--	--	--	[O]	Posttranslational modification, protein turnover, chaperones	ATP-dependent protease La (LON) domain;; Ring finger domain;; Zinc finger, C3HC4 type (RING finger);; Zinc finger, C3HC4 type (RING finger);; Zinc finger, C3HC4 type (RING finger);; zinc-RING finger domain	E3 ubiquitin-protein ligase PRT1 GN=PRT1 OS=Arabidopsis thaliana (Mouse-ear cress) PE=2 SV=2	O	Posttranslational modification, protein turnover, chaperones	PREDICTED: LON peptidase N-terminal domain and RING finger protein 1 isoform X1 [Sesamum indicum]
F02_cb3839_c7/f1p0/2203	[D]	Cell cycle control, cell division, chromosome partitioning	--	K03593|2.42768e-95|sot:102588488|iron-sulfur protein NUBPL-like; K03593 ATP-binding protein involved in chromosome partitioning (A)	--	[D]	Cell cycle control, cell division, chromosome partitioning	ParA/MinD ATPase like;; CobQ/CobB/MinD/ParA nucleotide binding domain;; AAA domain;; ATPase MipZ;; Anion-transporting ATPase	Fe-S cluster assembly factor HCF101, chloroplastic (Precursor) GN=HCF101 OS=Arabidopsis thaliana (Mouse-ear cress) PE=1 SV=1	D	Cell cycle control, cell division, chromosome partitioning	PREDICTED: iron-sulfur protein NUBPL [Sesamum indicum]
F01_cb2718_c10/f1p0/2866	--	--	--	--	--	[O]	Posttranslational modification, protein turnover, chaperones	Xylanase inhibitor N-terminal;; Xylanase inhibitor C-terminal;; Eukaryotic aspartyl protease	Aspartic proteinase-like protein 1 (Precursor) GN=At5g10080 OS=Arabidopsis thaliana (Mouse-ear cress) PE=1 SV=1	O	Posttranslational modification, protein turnover, chaperones	PREDICTED: aspartic proteinase-like protein 1 isoform X2 [Sesamum indicum]
F02_cb243_c6/f1p2/2835	--	--	Molecular Function: DNA binding (GO:0003677);; Biological Process: embryo development (GO:0009790);; Biological Process: regulation of flower development (GO:0009909);; Molecular Function: protein heterodimerization activity (GO:0046982);; Biological Process: ovule development (GO:0048481);;	--	--	--	--	LIM-domain binding protein;; LIM-domain binding protein	Transcriptional corepressor SEUSS GN=SEU OS=Arabidopsis thaliana (Mouse-ear cress) PE=1 SV=1	K	Transcription	hypothetical protein MIMGU_mgv1a001170mg [Erythranthe guttata]
F01_cb4814_c0/f1p0/2878	--	--	--	--	--	[R]	General function prediction only	PPR repeat;; PPR repeat family;; Pentatricopeptide repeat domain;; PPR repeat;; Mitochondrial ATPase expression	Pentatricopeptide repeat-containing protein At4g32430, mitochondrial (Precursor) GN=F8B4.130 OS=Arabidopsis thaliana (Mouse-ear cress) PE=2 SV=1	S	Function unknown	PREDICTED: pentatricopeptide repeat-containing protein At4g32430, mitochondrial [Sesamum indicum]
F01_cb2438_c10/f1p6/2428	--	--	--	--	--	--	--	Peptide N-acetyl-beta-D-glucosaminyl asparaginase amidase A	Peptide-N4-(N-acetyl-beta-glucosaminyl)asparagine amidase A heavy chain OS=Prunus dulcis (Almond) PE=1 SV=2	S	Function unknown	hypothetical protein MIMGU_mgv1a024665mg [Erythranthe guttata]
F02_cb11780_c12/f1p6/1440	[J]	Translation, ribosomal structure and biogenesis	Molecular Function: structural constituent of ribosome (GO:0003735);; Cellular Component: ribosome (GO:0005840);; Biological Process: translational elongation (GO:0006414);; Biological Process: ribosome biogenesis (GO:0042254);;	K02941|3.70846e-178|vvi:100254737|60S acidic ribosomal protein P0; K02941 large subunit ribosomal protein LP0 (A)	ko03010:Ribosome	[J]	Translation, ribosomal structure and biogenesis	60s Acidic ribosomal protein;; Ribosomal protein L10	60S acidic ribosomal protein P0 OS=Glycine max (Soybean) PE=1 SV=1	J	Translation, ribosomal structure and biogenesis	PREDICTED: 60S acidic ribosomal protein P0 [Sesamum indicum]
F01_cb2184_c2/f1p0/1680	--	--	--	K12183|6.93033e-103|rcu:RCOM_0991540|hypothetical protein; K12183 ESCRT-I complex subunit TSG101 (A)	ko04144:Endocytosis	[OU]	--	UEV domain;; Vps23 core domain	Protein ELC-like GN=MAC12.18 OS=Arabidopsis thaliana (Mouse-ear cress) PE=1 SV=1	U	Intracellular trafficking, secretion, and vesicular transport	hypothetical protein MIMGU_mgv1a020747mg [Erythranthe guttata]
F01_cb19515_c0/f1p0/728	--	--	--	--	--	--	--	Metallothionein	Metallothionein type 2b OS=Colocasia esculenta (Wild taro) PE=1 SV=1	--	--	--
F01_cb7430_c18/f1p1/2184	--	--	--	--	--	--	--	Sulfite exporter TauE/SafE	--	S	Function unknown	PREDICTED: uncharacterized protein LOC105157640 [Sesamum indicum]
F02_cb8758_c16/f1p0/1913	--	--	--	--	--	[R]	General function prediction only	PPR repeat family;; PPR repeat;; PPR repeat;; Pentatricopeptide repeat domain;; PPR repeat family;; PPR repeat;; PPR repeat;; Pentatricopeptide repeat domain;; PPR repeat family;; PPR repeat;; PPR repeat;; Pentatricopeptide repeat domain;; PPR repeat family;; PPR repeat;; PPR repeat	Pentatricopeptide repeat-containing protein At1g62670, mitochondrial (Precursor) GN=At1g62670 OS=Arabidopsis thaliana (Mouse-ear cress) PE=3 SV=2	S	Function unknown	PREDICTED: putative pentatricopeptide repeat-containing protein At1g12700, mitochondrial isoform X2 [Sesamum indicum]
F01_cb16438_c33026/f1p0/2010	[E]	Amino acid transport and metabolism	Molecular Function: L-alanine:2-oxoglutarate aminotransferase activity (GO:0004021);; Cellular Component: vacuole (GO:0005773);; Cellular Component: peroxisome (GO:0005777);; Molecular Function: alanine-glyoxylate transaminase activity (GO:0008453);; Cellular Component: chloroplast stroma (GO:0009570);; Biological Process: photorespiration (GO:0009853);; Cellular Component: membrane (GO:0016020);…	K14272|6.45816e-28|pop:POPTR_0010s05530g|POPTRDRAFT_833470; hypothetical protein; K14272 glutamate--glyoxylate aminotransferase [EC:2.6.1.4 2.6.1.2 2.6.1.44 2.6.1.-] (A)	ko00250:Alanine, aspartate and glutamate metabolism;ko00260:Glycine, serine and threonine metabolism;ko00630:Glyoxylate and dicarboxylate metabolism;ko00710:Carbon fixation in photosynthetic organisms;ko01200:Carbon metabolism;ko01210:2-Oxocarboxylic acid metabolism;ko01230:Biosynthesis of amino acids	[E]	Amino acid transport and metabolism	Domain of unknown function (DUF3523)	Glutamate--glyoxylate aminotransferase 1 OS=Arabidopsis thaliana (Mouse-ear cress) PE=1 SV=1	G	Carbohydrate transport and metabolism	PREDICTED: mannan endo-1,4-beta-mannosidase 7-like isoform X3 [Glycine max]
F01_cb13242_c14/f1p4/1316	--	--	Molecular Function: hydrolase activity, hydrolyzing O-glycosyl compounds (GO:0004553);; Biological Process: metabolic process (GO:0008152);;	K01183|2.47601e-102|gmx:100815291|acidic endochitinase-like; K01183 chitinase [EC:3.2.1.14] (A)	ko00520:Amino sugar and nucleotide sugar metabolism	[M]	Cell wall/membrane/envelope biogenesis	Glycosyl hydrolases family 18	Acidic endochitinase (Precursor) OS=Phaseolus angularis (Azuki bean) PE=2 SV=1	G	Carbohydrate transport and metabolism	PREDICTED: acidic endochitinase SE2-like [Sesamum indicum]
F01_cb13440_c4/f1p0/1628	--	--	Molecular Function: sequence-specific DNA binding transcription factor activity (GO:0003700);; Cellular Component: cytosol (GO:0005829);; Cellular Component: plasma membrane (GO:0005886);; Biological Process: regulation of transcription, DNA-templated (GO:0006355);; Molecular Function: phosphoric diester hydrolase activity (GO:0008081);; Cellular Component: plastid (GO:0009536);; Biological Proce…	--	--	[R]	General function prediction only	Tub family;; F-box domain	Tubby-like F-box protein 7 GN=TULP7 OS=Arabidopsis thaliana (Mouse-ear cress) PE=2 SV=1	S	Function unknown	PREDICTED: tubby-like F-box protein 7 [Sesamum indicum]
F02_cb16037_c8/f2p0/490	--	--	--	K11252|5.08549e-59|tcc:TCM_041892|Histone superfamily protein; K11252 histone H2B (A)	--	[B]	Chromatin structure and dynamics	Core histone H2A/H2B/H3/H4;; Histone-like transcription factor (CBF/NF-Y) and archaeal histone	Histone H2B.3 GN=At2g28720 OS=Arabidopsis thaliana (Mouse-ear cress) PE=1 SV=3	B	Chromatin structure and dynamics	PREDICTED: histone H2B-like [Sesamum indicum]
F02_cb16082_c8/f1p0/962	--	--	Molecular Function: hydrolase activity (GO:0016787);;	--	--	[R]	General function prediction only	--	Endo-1,3;1,4-beta-D-glucanase (Precursor) OS=Zea mays (Maize) PE=1 SV=1	Q	Secondary metabolites biosynthesis, transport and catabolism	putative dienelactone hydrolase family protein [Salvia miltiorrhiza]
F02_cb2728_c3/f1p0/3311	--	--	--	--	--	[DT]	--	G-protein alpha subunit;; ADP-ribosylation factor family	Extra-large guanine nucleotide-binding protein 1 GN=F26B6.11 OS=Arabidopsis thaliana (Mouse-ear cress) PE=1 SV=2	S	Function unknown	PREDICTED: extra-large guanine nucleotide-binding protein 1 [Sesamum indicum]
F01_cb3141_c2/f1p0/3239	[I]	Lipid transport and metabolism	Cellular Component: cytoplasm (GO:0005737);; Cellular Component: plasmodesma (GO:0009506);; Molecular Function: hydrolase activity (GO:0016787);;	--	--	[I]	Lipid transport and metabolism	Putative esterase	Caffeoylshikimate esterase GN=CSE OS=Arabidopsis thaliana (Mouse-ear cress) PE=1 SV=1	I	Lipid transport and metabolism	hypothetical protein MIMGU_mgv1a009566mg [Erythranthe guttata]
F01_cb2621_c10/f1p1/2104	--	--	--	--	--	--	--	Kelch motif;; Galactose oxidase, central domain;; F-box domain	F-box only protein 6 GN=FBX6 OS=Arabidopsis thaliana (Mouse-ear cress) PE=2 SV=1	S	Function unknown	PREDICTED: F-box only protein 6 [Sesamum indicum]
F01_cb7485_c2/f1p1/2155	[E]	Amino acid transport and metabolism	Biological Process: tryptophan biosynthetic process (GO:0000162);; Molecular Function: anthranilate phosphoribosyltransferase activity (GO:0004048);; Biological Process: protein glycosylation (GO:0006486);; Cellular Component: chloroplast stroma (GO:0009570);;	--	--	--	--	Glycosyl transferase family, helical bundle domain	--	E	Amino acid transport and metabolism	PREDICTED: uncharacterized protein LOC105156637 [Sesamum indicum]
F02_cb9357_c19/f1p0/983	--	--	Cellular Component: integral component of membrane (GO:0016021);;	--	--	[E]	Amino acid transport and metabolism	Transmembrane amino acid transporter protein	Lysine histidine transporter 1 GN=LHT1 OS=Arabidopsis thaliana (Mouse-ear cress) PE=1 SV=1	E	Amino acid transport and metabolism	PREDICTED: lysine histidine transporter 1-like [Sesamum indicum]
F01_cb4750_c8/f1p0/3099	--	--	--	--	--	[O]	Posttranslational modification, protein turnover, chaperones	--	E3 ubiquitin-protein ligase MBR2 GN=MBR2 OS=Arabidopsis thaliana (Mouse-ear cress) PE=1 SV=1	O	Posttranslational modification, protein turnover, chaperones	PREDICTED: E3 ubiquitin-protein ligase MBR2 [Sesamum indicum]
F02_cb11292_c14/f1p0/1790	[R]	General function prediction only	--	--	--	[R]	General function prediction only	RNA recognition motif. (a.k.a. RRM, RBD, or RNP domain);; RNA recognition motif (a.k.a. RRM, RBD, or RNP domain);; RNA recognition motif. (a.k.a. RRM, RBD, or RNP domain)	Polyadenylate-binding protein RBP47C GN=RBP47C OS=Arabidopsis thaliana (Mouse-ear cress) PE=2 SV=1	S	Function unknown	RNA-binding protein 47 [Populus trichocarpa]
F02_cb10913_c10/f7p2/1745	--	--	Molecular Function: cysteine-type endopeptidase activity (GO:0004197);; Biological Process: proteolysis (GO:0006508);;	K01369|3.52499e-146|mtr:MTR_3g104120|Vacuolar processing enzyme; K01369 legumain [EC:3.4.22.34] (A)	--	[O]	Posttranslational modification, protein turnover, chaperones	Peptidase C13 family;; Peptidase C13 family	Vacuolar-processing enzyme (Precursor) OS=Phaseolus vulgaris (Kidney bean) PE=1 SV=1	O	Posttranslational modification, protein turnover, chaperones	PREDICTED: vacuolar-processing enzyme gamma-isozyme-like [Beta vulgaris subsp. vulgaris]
F02_cb9415_c1/f1p0/1825	--	--	--	--	--	--	--	--	BTB/POZ domain-containing protein At2g13690 GN=PRL1-IFG OS=Arabidopsis thaliana (Mouse-ear cress) PE=2 SV=2	S	Function unknown	PREDICTED: BTB/POZ domain-containing protein At2g13690 [Sesamum indicum]
F02_cb19630_c1/f1p0/510	--	--	Biological Process: transition metal ion transport (GO:0000041);; Molecular Function: calcium ion binding (GO:0005509);; Cellular Component: cytoplasm (GO:0005737);; Biological Process: signal transduction (GO:0007165);; Biological Process: toxin catabolic process (GO:0009407);; Biological Process: ethylene biosynthetic process (GO:0009693);; Biological Process: plant-type cell wall modification …	K13448|2.22691e-57|pvu:PHAVU_003G275000g|hypothetical protein; K13448 calcium-binding protein CML (A)	ko04626:Plant-pathogen interaction	[T]	Signal transduction mechanisms	EF-hand domain pair;; EF-hand domain;; EF hand;; EF-hand domain pair	Probable calcium-binding protein CML21 GN=CML21 OS=Arabidopsis thaliana (Mouse-ear cress) PE=2 SV=1	DTZ	--	PREDICTED: probable calcium-binding protein CML21 [Sesamum indicum]
F01_cb15032_c12/f1p0/827	[J]	Translation, ribosomal structure and biogenesis	Molecular Function: RNA binding (GO:0003723);; Molecular Function: structural constituent of ribosome (GO:0003735);; Cellular Component: ribosome (GO:0005840);; Biological Process: translation (GO:0006412);;	K02964|3.94504e-91|sot:102586955|40S ribosomal protein S18-like; K02964 small subunit ribosomal protein S18e (A)	ko03010:Ribosome	[J]	Translation, ribosomal structure and biogenesis	Ribosomal protein S13/S18	40S ribosomal protein S18 GN=RPS18C OS=Arabidopsis thaliana (Mouse-ear cress) PE=1 SV=1	J	Translation, ribosomal structure and biogenesis	hypothetical protein MIMGU_mgv1a015580mg [Erythranthe guttata]
F01_cb16438_c1166/f1p0/2189	--	--	Molecular Function: peptidase activity (GO:0008233);;	K01366|4.77648e-105|brp:103845456|thiol protease aleurain; K01366 cathepsin H [EC:3.4.22.16] (A)	--	[O]	Posttranslational modification, protein turnover, chaperones	Cathepsin propeptide inhibitor domain (I29);; Papain family cysteine protease	Cysteine proteinase 3 (Precursor) GN=CYP-3 OS=Solanum lycopersicum (Tomato) PE=1 SV=1	O	Posttranslational modification, protein turnover, chaperones	PREDICTED: cysteine proteinase 3-like [Sesamum indicum]
F02_cb4538_c55/f1p2/1777	--	--	--	--	--	--	--	--	Protein MOR1 OS=Oryza sativa subsp. japonica (Rice) PE=2 SV=1	--	--	hypothetical protein MIMGU_mgv1a0006152mg, partial [Erythranthe guttata]
F01_cb18789_c18/f1p0/510	--	--	--	--	--	[R]	General function prediction only	Yippee zinc-binding/DNA-binding /Mis18, centromere assembly	Protein yippee-like At4g27740 GN=At4g27740 OS=Arabidopsis thaliana (Mouse-ear cress) PE=3 SV=1	S	Function unknown	PREDICTED: protein yippee-like At4g27745 [Sesamum indicum]
F01_cb20495_c6/f1p0/1507	--	--	Molecular Function: DNA binding (GO:0003677);; Molecular Function: chromatin binding (GO:0003682);; Molecular Function: sequence-specific DNA binding transcription factor activity (GO:0003700);; Biological Process: regulation of transcription, DNA-templated (GO:0006355);; Molecular Function: zinc ion binding (GO:0008270);; Biological Process: response to abiotic stimulus (GO:0009628);; Biological…	--	--	--	--	Myb-like DNA-binding domain	Transcription factor MYB1R1 OS=Solanum tuberosum (Potato) PE=2 SV=1	K	Transcription	PREDICTED: transcription factor MYB1R1 [Sesamum indicum]
F01_cb19938_c0/f1p0/1368	--	--	Molecular Function: transferase activity (GO:0016740);;	--	--	--	--	Leucine rich repeat N-terminal domain;; Leucine Rich repeats (2 copies);; Leucine Rich Repeat	LRR receptor-like serine/threonine-protein kinase EFR (Precursor) GN=EFR OS=Arabidopsis thaliana (Mouse-ear cress) PE=1 SV=1	S	Function unknown	hypothetical protein MIMGU_mgv1a019561mg, partial [Erythranthe guttata]
F01_cb16438_c56414/f6p2/1687	[Q]	Secondary metabolites biosynthesis, transport and catabolism	Molecular Function: monooxygenase activity (GO:0004497);; Molecular Function: iron ion binding (GO:0005506);; Biological Process: tryptophan catabolic process (GO:0006569);; Biological Process: fatty acid metabolic process (GO:0006631);; Molecular Function: electron carrier activity (GO:0009055);; Biological Process: indoleacetic acid biosynthetic process (GO:0009684);; Cellular Component: chloro…	K10528|0|sly:543642|HPL, CYP74B; fatty acid hydroperoxide lyase; K10528 hydroperoxide lyase [EC:4.1.2.-] (A)	ko00592:alpha-Linolenic acid metabolism	--	--	Cytochrome P450	Linolenate hydroperoxide lyase, chloroplastic {ECO:0000305|PubMed:9701595} (Precursor) OS=Arabidopsis thaliana (Mouse-ear cress) PE=1 SV=1	Q	Secondary metabolites biosynthesis, transport and catabolism	cytochrome P450 CYP74B21 [Salvia miltiorrhiza]
F01_cb18184_c4/f1p0/841	--	--	--	--	--	--	--	--	Late embryogenesis abundant protein Lea5 GN=LEA5 OS=Citrus sinensis (Sweet orange) PE=2 SV=1	S	Function unknown	late embryogenesis abundant protein Lea5 [Solanum nigrum]
F02_cb10006_c1/f1p0/1303	[QR]	--	Molecular Function: transferase activity (GO:0016740);;	K00599|6.39133e-133|sot:102603182|methyltransferase-like protein 6-like; K00599 methyltransferase-like protein 6 [EC:2.1.1.-] (A)	--	[R]	General function prediction only	Methyltransferase domain;; Methyltransferase domain;; Methyltransferase domain;; Methyltransferase domain;; Methyltransferase domain;; Methyltransferase small domain	--	S	Function unknown	hypothetical protein MIMGU_mgv1a009894mg [Erythranthe guttata]
F02_cb11041_c1076/f1p0/1587	--	--	Cellular Component: plastid (GO:0009536);;	--	--	--	--	Protein of unknown function (DUF3119)	--	S	Function unknown	PREDICTED: uncharacterized protein LOC105173507 isoform X2 [Sesamum indicum]
F02_cb14845_c0/f2p1/1028	[O]	Posttranslational modification, protein turnover, chaperones	Molecular Function: glutathione peroxidase activity (GO:0004602);; Cellular Component: plasma membrane (GO:0005886);; Biological Process: response to oxidative stress (GO:0006979);; Cellular Component: chloroplast (GO:0009507);; Biological Process: response to salt stress (GO:0009651);; Biological Process: response to cadmium ion (GO:0046686);; Molecular Function: phospholipid-hydroperoxide gluta…	K00432|1.55924e-100|sot:102603592|probable phospholipid hydroperoxide glutathione peroxidase-like; K00432 glutathione peroxidase [EC:1.11.1.9] (A)	ko00480:Glutathione metabolism;ko00590:Arachidonic acid metabolism	[O]	Posttranslational modification, protein turnover, chaperones	Glutathione peroxidase;; AhpC/TSA family;; Redoxin	Probable phospholipid hydroperoxide glutathione peroxidase OS=Nicotiana sylvestris (Wood tobacco) PE=2 SV=1	O	Posttranslational modification, protein turnover, chaperones	hypothetical protein MIMGU_mgv1a012812mg [Erythranthe guttata]
F02_cb5962_c10/f2p0/1591	--	--	Molecular Function: sequence-specific DNA binding transcription factor activity (GO:0003700);; Cellular Component: nucleus (GO:0005634);; Cellular Component: cytoplasm (GO:0005737);; Biological Process: regulation of transcription, DNA-templated (GO:0006355);; Biological Process: fruit development (GO:0010154);; Biological Process: negative regulation of auxin mediated signaling pathway (GO:00109…	K14484|1.82338e-91|mdm:103441702|IAA2; auxin-responsive protein IAA8-like; K14484 auxin-responsive protein IAA (A)	ko04075:Plant hormone signal transduction	--	--	AUX/IAA family;; AUX/IAA family	Auxin-responsive protein IAA8 GN=IAA8 OS=Arabidopsis thaliana (Mouse-ear cress) PE=1 SV=1	K	Transcription	Aux/IAA protein [Vitis vinifera]
F01_cb7481_c7/f1p0/2401	[G]	Carbohydrate transport and metabolism	Biological Process: carbohydrate metabolic process (GO:0005975);; Molecular Function: oxidoreductase activity, acting on the CH-OH group of donors, quinone or similar compound as acceptor (GO:0016901);; Molecular Function: quinone binding (GO:0048038);;	--	--	--	--	Glucose / Sorbosone dehydrogenase	HIPL1 protein (Precursor) GN=HIPL1 OS=Arabidopsis thaliana (Mouse-ear cress) PE=1 SV=2	G	Carbohydrate transport and metabolism	PREDICTED: HIPL1 protein-like [Sesamum indicum]
F01_cb12600_c5/f1p1/1583	[R]	General function prediction only	Molecular Function: beta-ureidopropionase activity (GO:0003837);; Cellular Component: cytosol (GO:0005829);; Biological Process: uracil catabolic process (GO:0006212);; Biological Process: cellular response to nitrogen levels (GO:0043562);;	K01431|0|pop:POPTR_0007s03190g|POPTRDRAFT_819740; hypothetical protein; K01431 beta-ureidopropionase [EC:3.5.1.6] (A)	ko00240:Pyrimidine metabolism;ko00410:beta-Alanine metabolism;ko00770:Pantothenate and CoA biosynthesis	[E]	Amino acid transport and metabolism	Carbon-nitrogen hydrolase	N-carbamoylputrescine amidase GN=F10A12.13 OS=Arabidopsis thaliana (Mouse-ear cress) PE=1 SV=1	S	Function unknown	PREDICTED: beta-ureidopropionase [Sesamum indicum]
F02_cb11041_c54414/f1p0/2225	[R]	General function prediction only	--	K03363|5.87078e-100|vvi:100247826|cell division cycle 20.5, cofactor of APC complex-like; K03363 cell division cycle 20, cofactor of APC complex (A)	ko04120:Ubiquitin mediated proteolysis	[DO]	--	--	Cell division cycle 20.5, cofactor of APC complex GN=F15A18.30 OS=Arabidopsis thaliana (Mouse-ear cress) PE=1 SV=2	S	Function unknown	PREDICTED: cell division cycle 20.2, cofactor of APC complex-like [Sesamum indicum]
F02_cb17921_c1/f1p0/595	--	--	--	--	--	--	--	--	--	S	Function unknown	hypothetical protein MIMGU_mgv11b0221162mg, partial [Erythranthe guttata]
F01_cb4255_c4/f1p0/2219	--	--	Molecular Function: zinc ion binding (GO:0008270);;	K16277|0|sot:102584850|E3 ubiquitin protein ligase DRIP2-like; K16277 E3 ubiquitin-protein ligase DRIP [EC:6.3.2.19] (A)	--	[S]	Function unknown	Zinc finger, C3HC4 type (RING finger);; Zinc finger, C3HC4 type (RING finger);; zinc-RING finger domain	E3 ubiquitin protein ligase DRIP2 GN=DRIP2 OS=Arabidopsis thaliana (Mouse-ear cress) PE=1 SV=1	S	Function unknown	PREDICTED: E3 ubiquitin protein ligase DRIP2 [Sesamum indicum]
F02_cb11041_c55374/f1p1/1405	--	--	--	--	--	[R]	General function prediction only	Root hair defective 3 GTP-binding protein (RHD3);; Dynamin family	Protein ROOT HAIR DEFECTIVE 3 {ECO:0000255|HAMAP-Rule:MF_03109} GN=MCP4.11 OS=Arabidopsis thaliana (Mouse-ear cress) PE=1 SV=1	Z	Cytoskeleton	PREDICTED: protein ROOT HAIR DEFECTIVE 3 homolog 2 isoform X3 [Sesamum indicum]
F02_cb11041_c1209/f1p0/1659	--	--	--	--	--	--	--	--	Putative F-box/LRR-repeat protein At5g02700 GN=At5g02700 OS=Arabidopsis thaliana (Mouse-ear cress) PE=4 SV=1	S	Function unknown	PREDICTED: putative F-box/LRR-repeat protein At5g02930 [Sesamum indicum]
F01_cb16438_c38118/f1p0/2410	[O]	Posttranslational modification, protein turnover, chaperones	Molecular Function: ATP binding (GO:0005524);; Cellular Component: nucleolus (GO:0005730);; Cellular Component: mitochondrion (GO:0005739);; Cellular Component: plasma membrane (GO:0005886);; Biological Process: cell death (GO:0008219);; Biological Process: response to cold (GO:0009409);; Cellular Component: chloroplast stroma (GO:0009570);; Biological Process: systemic acquired resistance (GO:00…	K04077|0|vvi:100263832|ruBisCO large subunit-binding protein subunit beta, chloroplastic; K04077 chaperonin GroEL (A)	ko03018:RNA degradation	[O]	Posttranslational modification, protein turnover, chaperones	TCP-1/cpn60 chaperonin family;; TCP-1/cpn60 chaperonin family	RuBisCO large subunit-binding protein subunit beta, chloroplastic (Precursor) OS=Pisum sativum (Garden pea) PE=1 SV=2	O	Posttranslational modification, protein turnover, chaperones	PREDICTED: ruBisCO large subunit-binding protein subunit beta, chloroplastic [Sesamum indicum]
F01_cb5848_c1/f1p0/2226	[RTKL]	--	--	K04733|0|sly:101261326|serine/threonine-protein kinase PBS1-like; K04733 interleukin-1 receptor-associated kinase 4 [EC:2.7.11.1] (A)	--	[T]	Signal transduction mechanisms	Protein kinase domain;; Protein tyrosine kinase	Serine/threonine-protein kinase CDL1 {ECO:0000305} OS=Arabidopsis thaliana (Mouse-ear cress) PE=1 SV=1	T	Signal transduction mechanisms	PREDICTED: serine/threonine-protein kinase CDL1 [Sesamum indicum]
F01_cb3666_c66/f1p0/1236	[C]	Energy production and conversion	--	K00128|1.24003e-53|sot:102591095|aldehyde dehydrogenase family 3 member H1-like; K00128 aldehyde dehydrogenase (NAD+) [EC:1.2.1.3] (A)	ko00010:Glycolysis / Gluconeogenesis;ko00040:Pentose and glucuronate interconversions;ko00053:Ascorbate and aldarate metabolism;ko00071:Fatty acid degradation;ko00280:Valine, leucine and isoleucine degradation;ko00310:Lysine degradation;ko00330:Arginine and proline metabolism;ko00340:Histidine metabolism;ko00380:Tryptophan metabolism;ko00410:beta-Alanine metabolism;ko00561:Glycerolipid metabolism…	[C]	Energy production and conversion	Aldehyde dehydrogenase family	Aldehyde dehydrogenase GN=ALDH OS=Craterostigma plantagineum (Blue gem) PE=1 SV=1	C	Energy production and conversion	hypothetical protein MIMGU_mgv1a005625mg [Erythranthe guttata]
F01_cb5420_c11/f1p1/1679	[Q]	Secondary metabolites biosynthesis, transport and catabolism	Molecular Function: oxidoreductase activity, acting on single donors with incorporation of molecular oxygen, incorporation of two atoms of oxygen (GO:0016702);;	K11159|0|cit:102616031|CitCCD1; carotenoid 9,10(9',10')-cleavage dioxygenase 1-like; K11159 carotenoid cleavage dioxygenase (A)	--	[Q]	Secondary metabolites biosynthesis, transport and catabolism	Retinal pigment epithelial membrane protein	Carotenoid 9,10(9&apos;,10&apos;)-cleavage dioxygenase GN=CCD OS=Crocus sativus (Saffron) PE=1 SV=1	Q	Secondary metabolites biosynthesis, transport and catabolism	carotenoid cleavage dioxygenase 1 [Scutellaria baicalensis]
F02_cb185_c15/f1p1/4833	[TDBLU]	--	Molecular Function: kinase activity (GO:0016301);; Biological Process: phosphorylation (GO:0016310);; Molecular Function: phosphotransferase activity, alcohol group as acceptor (GO:0016773);; Biological Process: phosphatidylinositol metabolic process (GO:0046488);;	K00888|0|sly:101248349|phosphatidylinositol 4-kinase beta 1-like; K00888 phosphatidylinositol 4-kinase [EC:2.7.1.67] (A)	ko00562:Inositol phosphate metabolism;ko04070:Phosphatidylinositol signaling system	[TU]	--	Phosphatidylinositol 3- and 4-kinase	Phosphatidylinositol 4-kinase beta 1 GN=MHJ24.5 OS=Arabidopsis thaliana (Mouse-ear cress) PE=1 SV=1	I	Lipid transport and metabolism	PREDICTED: phosphatidylinositol 4-kinase beta 1-like [Sesamum indicum]
F01_cb13275_c2/f1p0/2434	[U]	Intracellular trafficking, secretion, and vesicular transport	--	--	--	--	--	Grap2 and cyclin-D-interacting	Sec-independent protein translocase protein TATC, chloroplastic (Precursor) OS=Oryza sativa subsp. japonica (Rice) PE=2 SV=1	S	Function unknown	PREDICTED: uncharacterized protein LOC105160349 isoform X1 [Sesamum indicum]
F01_cb18285_c2/f1p0/1592	--	--	--	--	--	--	--	D-mannose binding lectin	Epidermis-specific secreted glycoprotein EP1 (Precursor) GN=EP1 OS=Daucus carota (Wild carrot) PE=1 SV=1	S	Function unknown	Epidermis-specific secreted glycoprotein EP1 [Morus notabilis]
F01_cb17516_c0/f2p0/441	--	--	--	--	--	--	--	--	--	--	--	hypothetical protein MIMGU_mgv1a017405mg [Erythranthe guttata]
F01_cb1310_c9/f1p0/2352	--	--	--	K15601|0|vvi:100249389|lysine-specific demethylase JMJ25; K15601 lysine-specific demethylase 3 [EC:1.14.11.-] (A)	--	[K]	Transcription	JmjC domain, hydroxylase	Lysine-specific demethylase JMJ25 GN=MLP3.6 OS=Arabidopsis thaliana (Mouse-ear cress) PE=1 SV=1	S	Function unknown	PREDICTED: lysine-specific demethylase JMJ25 isoform X1 [Sesamum indicum]
F01_cb11894_c3/f1p0/848	--	--	--	--	--	--	--	--	--	J	Translation, ribosomal structure and biogenesis	PREDICTED: uncharacterized protein LOC102670391 [Glycine max]
F01_cb19455_c1/f1p0/1149	[J]	Translation, ribosomal structure and biogenesis	Molecular Function: structural constituent of ribosome (GO:0003735);; Cellular Component: nucleolus (GO:0005730);; Cellular Component: vacuole (GO:0005773);; Cellular Component: plasma membrane (GO:0005886);; Biological Process: translation (GO:0006412);; Molecular Function: 5S rRNA binding (GO:0008097);; Biological Process: cell proliferation (GO:0008283);; Cellular Component: chloroplast (GO:00…	K02932|0|tcc:TCM_019840|Ribosomal protein L5 B isoform 1; K02932 large subunit ribosomal protein L5e (A)	ko03010:Ribosome	[J]	Translation, ribosomal structure and biogenesis	Ribosomal L18p/L5e family;; Ribosomal L18 C-terminal region	60S ribosomal protein L5 GN=RPL5 OS=Cucumis sativus (Cucumber) PE=2 SV=1	J	Translation, ribosomal structure and biogenesis	Ribosomal protein L5 B isoform 1 [Theobroma cacao]
F01_cb16122_c0/f2p0/1497	[J]	Translation, ribosomal structure and biogenesis	Biological Process: tRNA dihydrouridine synthesis (GO:0002943);; Biological Process: regulation of nitrogen utilization (GO:0006808);; Molecular Function: tRNA dihydrouridine synthase activity (GO:0017150);; Molecular Function: flavin adenine dinucleotide binding (GO:0050660);; Biological Process: oxidation-reduction process (GO:0055114);;	K05543|0|rcu:RCOM_0188130|tRNA-dihydrouridine synthase, putative; K05543 tRNA-dihydrouridine synthase 2 [EC:1.3.1.91] (A)	--	[J]	Translation, ribosomal structure and biogenesis	Dihydrouridine synthase (Dus)	tRNA-dihydrouridine(47) synthase [NAD(P)(+)]-like GN=At4g38890 OS=Arabidopsis thaliana (Mouse-ear cress) PE=1 SV=2	J	Translation, ribosomal structure and biogenesis	PREDICTED: tRNA-dihydrouridine(20) synthase [NAD(P)+]-like isoform X3 [Sesamum indicum]
F02_cb2752_c3/f1p0/2305	--	--	--	--	--	--	--	--	--	S	Function unknown	PREDICTED: uncharacterized protein LOC105160171 [Sesamum indicum]
F01_cb16299_c0/f2p0/1113	[P]	Inorganic ion transport and metabolism	--	K06195|5.63372e-134|vvi:100267315|uncharacterized LOC100267315; K06195 ApaG protein (A)	--	[P]	Inorganic ion transport and metabolism	Protein of unknown function (DUF525);; UvrB/uvrC motif	--	P	Inorganic ion transport and metabolism	PREDICTED: uncharacterized protein LOC105157230 [Sesamum indicum]
F01_cb19874_c0/f2p0/551	--	--	--	K16282|2.61994e-36|sot:102595441|E3 ubiquitin-protein ligase Arkadia-like; K16282 E3 ubiquitin-protein ligase RHA2 [EC:6.3.2.19] (A)	--	[O]	Posttranslational modification, protein turnover, chaperones	Ring finger domain;; Zinc finger, C3HC4 type (RING finger)	Probable E3 ubiquitin-protein ligase XERICO GN=XERICO OS=Arabidopsis thaliana (Mouse-ear cress) PE=1 SV=1	O	Posttranslational modification, protein turnover, chaperones	PREDICTED: putative RING-H2 finger protein ATL50 [Sesamum indicum]
F02_cb1857_c6/f1p0/2064	[E]	Amino acid transport and metabolism	Biological Process: metabolic process (GO:0008152);; Molecular Function: pyridoxal phosphate binding (GO:0030170);; Molecular Function: isopenicillin-N epimerase activity (GO:0045439);;	--	--	[E]	Amino acid transport and metabolism	Aminotransferase class-V	L-cysteine desulfhydrase GN=LCD OS=Arabidopsis thaliana (Mouse-ear cress) PE=2 SV=1	E	Amino acid transport and metabolism	PREDICTED: L-cysteine desulfhydrase [Sesamum indicum]
F02_cb8723_c30/f5p3/2086	--	--	Molecular Function: 1-phosphatidylinositol binding (GO:0005545);; Cellular Component: clathrin coat (GO:0030118);; Molecular Function: clathrin binding (GO:0030276);; Biological Process: clathrin coat assembly (GO:0048268);;	--	--	[TU]	--	ANTH domain;; ANTH domain	Putative clathrin assembly protein At5g35200 GN=At5g35200 OS=Arabidopsis thaliana (Mouse-ear cress) PE=1 SV=1	U	Intracellular trafficking, secretion, and vesicular transport	PREDICTED: putative clathrin assembly protein At5g35200 [Sesamum indicum]
F02_cb14078_c1/f1p0/606	--	--	Molecular Function: phosphoglycerate mutase activity (GO:0004619);; Cellular Component: plastid (GO:0009536);;	K15637|5.61219e-61|sot:102592219|phosphoglycerate mutase 2-like; K15637 serine/threonine-protein phosphatase PGAM5 [EC:3.1.3.16] (A)	--	[G]	Carbohydrate transport and metabolism	Histidine phosphatase superfamily (branch 1)	Probable 2-carboxy-D-arabinitol-1-phosphatase {ECO:0000305} (Precursor) OS=Arabidopsis thaliana (Mouse-ear cress) PE=1 SV=1	G	Carbohydrate transport and metabolism	PREDICTED: probable 2-carboxy-D-arabinitol-1-phosphatase [Sesamum indicum]
F01_cb6304_c1/f1p0/2536	[Q]	Secondary metabolites biosynthesis, transport and catabolism	Molecular Function: binding (GO:0005488);; Molecular Function: oxidoreductase activity (GO:0016491);;	--	--	[Q]	Secondary metabolites biosynthesis, transport and catabolism	--	Cytochrome P450 76A2 GN=CYP76A2 OS=Solanum melongena (Eggplant) PE=2 SV=1	Q	Secondary metabolites biosynthesis, transport and catabolism	cytochrome P450 CYP76A35 [Salvia miltiorrhiza]
F02_cb2534_c4/f1p0/3269	[V]	Defense mechanisms	Molecular Function: nucleotide binding (GO:0000166);; Biological Process: transport (GO:0006810);; Biological Process: cellular process (GO:0009987);; Molecular Function: ATPase activity (GO:0016887);;	K05658|1.50567e-91|cmo:103485892|ABC transporter B family member 4-like; K05658 ATP-binding cassette, subfamily B (MDR/TAP), member 1 [EC:3.6.3.44] (A)	ko02010:ABC transporters	[Q]	Secondary metabolites biosynthesis, transport and catabolism	ABC transporter transmembrane region;; ABC transporter	ABC transporter B family member 4 GN=F14M4.17 OS=Arabidopsis thaliana (Mouse-ear cress) PE=1 SV=1	V	Defense mechanisms	hypothetical protein MIMGU_mgv1a020574mg [Erythranthe guttata]
F02_cb11390_c28/f1p0/1582	[R]	General function prediction only	Molecular Function: Rab GTPase activator activity (GO:0005097);; Biological Process: positive regulation of Rab GTPase activity (GO:0032851);;	--	--	[R]	General function prediction only	Rab-GTPase-TBC domain	--	S	Function unknown	hypothetical protein MIMGU_mgv1a008955mg [Erythranthe guttata]
F02_cb2770_c7/f1p0/1839	--	--	Molecular Function: kinase activity (GO:0016301);; Biological Process: phosphorylation (GO:0016310);;	K13137|1.25533e-46|rcu:RCOM_0826280|serine-threonine kinase receptor-associated protein, putative; K13137 serine-threonine kinase receptor-associated protein (A)	ko03013:RNA transport	[I]	Lipid transport and metabolism	WD domain, G-beta repeat	--	S	Function unknown	serine-threonine kinase receptor-associated protein, putative [Ricinus communis]
F01_cb16438_c12912/f1p0/2058	--	--	--	--	--	[R]	General function prediction only	Ankyrin repeats (3 copies);; Ankyrin repeat;; Ankyrin repeats (many copies);; Ankyrin repeat;; Ankyrin repeats (many copies);; Zinc finger C-x8-C-x5-C-x3-H type (and similar)	Zinc finger CCCH domain-containing protein 29 GN=At2g40140 OS=Arabidopsis thaliana (Mouse-ear cress) PE=2 SV=1	S	Function unknown	PREDICTED: zinc finger CCCH domain-containing protein 29-like [Sesamum indicum]
F01_cb9796_c60/f1p0/2979	--	--	Molecular Function: intracellular cyclic nucleotide activated cation channel activity (GO:0005221);; Molecular Function: inward rectifier potassium channel activity (GO:0005242);; Molecular Function: calmodulin binding (GO:0005516);; Cellular Component: plasma membrane (GO:0005886);; Biological Process: potassium ion transport (GO:0006813);; Biological Process: calcium ion transport (GO:0006816);…	K05391|0|tcc:TCM_015364|Cyclic nucleotide gated channel 1 isoform 1; K05391 cyclic nucleotide gated channel, other eukaryote (A)	ko04626:Plant-pathogen interaction	[PT]	--	Ion transport protein;; Cyclic nucleotide-binding domain	Cyclic nucleotide-gated ion channel 1 GN=CNGC1 OS=Arabidopsis thaliana (Mouse-ear cress) PE=1 SV=1	U	Intracellular trafficking, secretion, and vesicular transport	PREDICTED: cyclic nucleotide-gated ion channel 1-like [Sesamum indicum]
F02_cb17847_c1/f1p0/457	--	--	Cellular Component: chloroplast thylakoid membrane (GO:0009535);; Cellular Component: chloroplast stroma (GO:0009570);; Molecular Function: amino acid binding (GO:0016597);; Biological Process: dolichol biosynthetic process (GO:0019408);;	--	--	--	--	ACT domain	ACT domain-containing protein ACR12 {ECO:0000305} (Precursor) OS=Arabidopsis thaliana (Mouse-ear cress) PE=2 SV=1	--	--	PREDICTED: ACT domain-containing protein DS12, chloroplastic [Sesamum indicum]
F01_cb20293_c2/f1p0/677	--	--	Cellular Component: membrane (GO:0016020);; Biological Process: cellular metabolic process (GO:0044237);; Cellular Component: intracellular part (GO:0044424);; Biological Process: single-organism process (GO:0044699);; Biological Process: oxidation-reduction process (GO:0055114);;	--	--	--	--	NADH dehydrogenase transmembrane subunit	--	S	Function unknown	PREDICTED: uncharacterized protein LOC105159914 [Sesamum indicum]
F02_cb16499_c2/f2p0/692	--	--	Biological Process: maltose metabolic process (GO:0000023);; Biological Process: pentose-phosphate shunt (GO:0006098);; Cellular Component: chloroplast thylakoid membrane (GO:0009535);; Cellular Component: chloroplast stroma (GO:0009570);; Biological Process: starch biosynthetic process (GO:0019252);; Biological Process: positive regulation of catalytic activity (GO:0043085);;	--	--	--	--	--	--	S	Function unknown	PREDICTED: uncharacterized protein LOC105174032 [Sesamum indicum]
F01_cb6012_c2/f1p0/2540	--	--	--	--	--	--	--	--	--	S	Function unknown	PREDICTED: uncharacterized protein LOC105167885 [Sesamum indicum]
F01_cb4660_c3/f1p0/2827	--	--	--	--	--	--	--	--	--	S	Function unknown	PREDICTED: uncharacterized protein LOC105159502 [Sesamum indicum]
F02_cb923_c18/f1p0/1840	--	--	--	K18442|7.80485e-60|sly:101254941|brefeldin A-inhibited guanine nucleotide-exchange protein 2-like; K18442 brefeldin A-inhibited guanine nucleotide-exchange protein (A)	ko04144:Endocytosis	[U]	Intracellular trafficking, secretion, and vesicular transport	--	Brefeldin A-inhibited guanine nucleotide-exchange protein 2 GN=BIG2 OS=Arabidopsis thaliana (Mouse-ear cress) PE=2 SV=1	S	Function unknown	PREDICTED: brefeldin A-inhibited guanine nucleotide-exchange protein 2 [Sesamum indicum]
F02_cb15907_c16/f1p1/859	--	--	Cellular Component: chloroplast (GO:0009507);; Biological Process: embryo development ending in seed dormancy (GO:0009793);;	--	--	--	--	--	--	S	Function unknown	PREDICTED: uncharacterized protein LOC105169586 [Sesamum indicum]
F01_cb9675_c2/f1p0/1967	--	--	--	--	--	[S]	Function unknown	Spinocerebellar ataxia type 10 protein domain	--	S	Function unknown	PREDICTED: ataxin-10 [Sesamum indicum]
F01_cb1195_c8/f1p0/3017	--	--	Molecular Function: nucleic acid binding (GO:0003676);; Biological Process: nucleobase-containing compound metabolic process (GO:0006139);; Molecular Function: methyltransferase activity (GO:0008168);; Biological Process: methylation (GO:0032259);;	--	--	[K]	Transcription	MT-A70;; MT-A70	Methyltransferase-like protein 1 GN=EMB1691 OS=Arabidopsis thaliana (Mouse-ear cress) PE=2 SV=1	S	Function unknown	PREDICTED: methyltransferase-like protein 1 [Sesamum indicum]
F02_cb16314_c2/f1p3/860	--	--	--	--	--	--	--	Protein of unknown function (DUF674)	--	S	Function unknown	hypothetical protein MIMGU_mgv1a024793mg [Erythranthe guttata]
F01_cb6757_c5/f1p0/2046	[M]	Cell wall/membrane/envelope biogenesis	--	--	--	[G]	Carbohydrate transport and metabolism	Glycosyl transferase family 8	UDP-glucuronate:xylan alpha-glucuronosyltransferase 1 GN=MVE11.2 OS=Arabidopsis thaliana (Mouse-ear cress) PE=2 SV=1	O	Posttranslational modification, protein turnover, chaperones	PREDICTED: UDP-glucuronate:xylan alpha-glucuronosyltransferase 1-like isoform X2 [Sesamum indicum]
F01_cb17119_c4/f1p0/713	--	--	Biological Process: formation of translation preinitiation complex (GO:0001731);; Molecular Function: translation initiation factor activity (GO:0003743);; Cellular Component: eukaryotic translation initiation factor 3 complex (GO:0005852);; Biological Process: regulation of translational initiation (GO:0006446);; Cellular Component: eukaryotic 43S preinitiation complex (GO:0016282);; Cellular Co…	K15028|2.98446e-20|fve:101306954|eukaryotic translation initiation factor 3 subunit K-like; K15028 translation initiation factor 3 subunit K (A)	--	[S]	Function unknown	--	Eukaryotic translation initiation factor 3 subunit K {ECO:0000255|HAMAP-Rule:MF_03010} GN=OSJNBa0032G08.17 OS=Oryza sativa subsp. japonica (Rice) PE=2 SV=1	J	Translation, ribosomal structure and biogenesis	PREDICTED: eukaryotic translation initiation factor 3 subunit K [Sesamum indicum]
F01_cb6180_c0/f6p0/1431	--	--	--	--	--	--	--	GAGA binding protein-like family	Protein BASIC PENTACYSTEINE6 GN=MDH9.22 OS=Arabidopsis thaliana (Mouse-ear cress) PE=1 SV=1	--	--	PREDICTED: protein BASIC PENTACYSTEINE6-like [Sesamum indicum]
F01_cb4170_c9/f1p0/1893	[DKL]	--	Biological Process: regulation of cyclin-dependent protein serine/threonine kinase activity (GO:0000079);; Biological Process: regulation of transcription, DNA-templated (GO:0006355);; Biological Process: RNA processing (GO:0006396);; Molecular Function: protein kinase binding (GO:0019901);;	--	--	[R]	General function prediction only	Cyclin, N-terminal domain;; Transcription factor TFIIB repeat	Cyclin-L1-1 GN=T9J22.10 OS=Arabidopsis thaliana (Mouse-ear cress) PE=1 SV=2	DKL	--	PREDICTED: LOW QUALITY PROTEIN: cyclin-L1-1 [Sesamum indicum]
F01_cb15426_c8/f1p0/946	[J]	Translation, ribosomal structure and biogenesis	Molecular Function: structural constituent of ribosome (GO:0003735);; Cellular Component: ribosome (GO:0005840);; Biological Process: translation (GO:0006412);;	K02995|3.14036e-104|pop:POPTR_0017s14180g|hypothetical protein; K02995 small subunit ribosomal protein S8e (A)	ko03010:Ribosome	[J]	Translation, ribosomal structure and biogenesis	Ribosomal protein S8e	40S ribosomal protein S8 GN=RPS8 OS=Zea mays (Maize) PE=1 SV=2	J	Translation, ribosomal structure and biogenesis	PREDICTED: 40S ribosomal protein S8 [Sesamum indicum]
F02_cb7350_c4/f1p0/2077	--	--	--	--	--	--	--	--	Interactor of constitutive active ROPs 3 GN=F15L12.15 OS=Arabidopsis thaliana (Mouse-ear cress) PE=1 SV=1	S	Function unknown	PREDICTED: LOW QUALITY PROTEIN: interactor of constitutive active ROPs 3 [Sesamum indicum]
F01_cb15302_c4/f1p1/898	--	--	Cellular Component: chromatin (GO:0000785);; Molecular Function: DNA binding (GO:0003677);; Molecular Function: chromatin binding (GO:0003682);; Molecular Function: sequence-specific DNA binding transcription factor activity (GO:0003700);; Cellular Component: nucleus (GO:0005634);; Biological Process: glucose catabolic process (GO:0006007);; Biological Process: chromatin assembly or disassembly (…	K10802|1.44083e-40|vvi:100246082|high mobility group-like; K10802 high mobility group protein B1 (A)	ko03410:Base excision repair	[R]	General function prediction only	HMG (high mobility group) box;; HMG-box domain	High mobility group B protein 3 GN=At1g20696 OS=Arabidopsis thaliana (Mouse-ear cress) PE=1 SV=1	B	Chromatin structure and dynamics	PREDICTED: HMG1/2-like protein [Sesamum indicum]
F01_cb10460_c29/f2p1/2059	[R]	General function prediction only	Cellular Component: plasma membrane (GO:0005886);;	--	--	[R]	General function prediction only	Ankyrin repeats (3 copies);; Ankyrin repeats (many copies);; Ankyrin repeats (many copies);; Ankyrin repeat;; Ankyrin repeat;; Domain of unknown function	Ankyrin repeat-containing protein At2g01680 GN=At2g01680 OS=Arabidopsis thaliana (Mouse-ear cress) PE=2 SV=1	S	Function unknown	PREDICTED: ankyrin repeat-containing protein At2g01680 [Sesamum indicum]
F02_cb11075_c9/f1p0/1609	[O]	Posttranslational modification, protein turnover, chaperones	--	K09518|4.77648e-149|sly:101261306|chaperone protein dnaJ 49; K09518 DnaJ homolog subfamily B member 12 (A)	ko04141:Protein processing in endoplasmic reticulum	[O]	Posttranslational modification, protein turnover, chaperones	DnaJ domain;; Domain of unknown function (DUF1977)	Chaperone protein dnaJ 49 OS=Arabidopsis thaliana (Mouse-ear cress) PE=2 SV=2	O	Posttranslational modification, protein turnover, chaperones	PREDICTED: chaperone protein dnaJ 49-like [Sesamum indicum]
F01_cb26_c10/f1p0/1962	[R]	General function prediction only	--	--	--	[R]	General function prediction only	WD domain, G-beta repeat	Probable cytosolic iron-sulfur protein assembly protein CIAO1 homolog {ECO:0000255|HAMAP-Rule:MF_03037} GN=CHLREDRAFT_130093 OS=Chlamydomonas reinhardtii (Chlamydomonas smithii) PE=3 SV=1	S	Function unknown	hypothetical protein MIMGU_mgv1a023707mg, partial [Erythranthe guttata]
F02_cb6132_c5/f1p0/2466	--	--	--	--	--	--	--	--	Transcription factor BIM1 GN=T22D6.70 OS=Arabidopsis thaliana (Mouse-ear cress) PE=1 SV=2	K	Transcription	PREDICTED: transcription factor BIM1 isoform X1 [Sesamum indicum]
F01_cb4381_c49/f1p0/2553	--	--	Molecular Function: DNA binding (GO:0003677);; Cellular Component: nucleus (GO:0005634);;	--	--	[K]	Transcription	Hsp20/alpha crystallin family	AT-rich interactive domain-containing protein 5 GN=ARID5 OS=Arabidopsis thaliana (Mouse-ear cress) PE=1 SV=1	S	Function unknown	PREDICTED: AT-rich interactive domain-containing protein 5-like [Sesamum indicum]
F01_cb3491_c10/f2p0/1856	--	--	--	K13457|1.15571e-26|pop:POPTR_0003s14960g|POPTRDRAFT_554585; disease resistance family protein; K13457 disease resistance protein RPM1 (A)	ko04626:Plant-pathogen interaction	[T]	Signal transduction mechanisms	Leucine rich repeat;; Leucine Rich repeats (2 copies)	Probable disease resistance protein At1g58390 GN=At1g58390 OS=Arabidopsis thaliana (Mouse-ear cress) PE=2 SV=4	S	Function unknown	hypothetical protein MIMGU_mgv1a018451mg [Erythranthe guttata]
F01_cb10339_c17/f1p0/1343	--	--	Molecular Function: sequence-specific DNA binding transcription factor activity (GO:0003700);; Cellular Component: cytosol (GO:0005829);; Cellular Component: plasma membrane (GO:0005886);; Biological Process: regulation of transcription, DNA-templated (GO:0006355);; Molecular Function: phosphoric diester hydrolase activity (GO:0008081);; Cellular Component: plastid (GO:0009536);; Biological Proce…	--	--	[R]	General function prediction only	Tub family	Tubby-like F-box protein 5 OS=Oryza sativa subsp. japonica (Rice) PE=2 SV=1	S	Function unknown	PREDICTED: tubby-like F-box protein 5 [Sesamum indicum]
F01_cb13044_c660/f1p0/1908	[P]	Inorganic ion transport and metabolism	Biological Process: response to hypoxia (GO:0001666);; Cellular Component: nucleus (GO:0005634);; Cellular Component: plasma membrane (GO:0005886);; Biological Process: protein targeting to membrane (GO:0006612);; Biological Process: nucleotide transport (GO:0006862);; Biological Process: ER to Golgi vesicle-mediated transport (GO:0006888);; Biological Process: membrane fusion (GO:0006944);; Mole…	K03320|0|pper:PRUPE_ppa004542mg|hypothetical protein; K03320 ammonium transporter, Amt family (A)	--	[P]	Inorganic ion transport and metabolism	Ammonium Transporter Family	Ammonium transporter 1 member 1 GN=AMT1-1 OS=Arabidopsis thaliana (Mouse-ear cress) PE=1 SV=1	P	Inorganic ion transport and metabolism	PREDICTED: ammonium transporter 1 member 1-like [Eucalyptus grandis]
F02_cb8026_c9/f1p0/2339	--	--	Cellular Component: integral component of membrane (GO:0016021);;	K17086|0|sot:102594477|transmembrane 9 superfamily member 4-like; K17086 transmembrane 9 superfamily member 2/4 (A)	--	[U]	Intracellular trafficking, secretion, and vesicular transport	Endomembrane protein 70;; Endomembrane protein 70;; Endomembrane protein 70	Transmembrane 9 superfamily member 9 {ECO:0000305} (Precursor) OS=Arabidopsis thaliana (Mouse-ear cress) PE=2 SV=1	S	Function unknown	hypothetical protein MIMGU_mgv1a002734mg [Erythranthe guttata]
F01_cb22120_c0/f2p0/677	[U]	Intracellular trafficking, secretion, and vesicular transport	Cellular Component: membrane (GO:0016020);;	K17279|2.16082e-86|sly:101250343|HVA22-like protein f; K17279 receptor expression-enhancing protein 5/6 (A)	--	[U]	Intracellular trafficking, secretion, and vesicular transport	TB2/DP1, HVA22 family	HVA22-like protein f GN=HVA22F OS=Arabidopsis thaliana (Mouse-ear cress) PE=2 SV=1	U	Intracellular trafficking, secretion, and vesicular transport	PREDICTED: HVA22-like protein f [Sesamum indicum]
F02_cb2794_c11/f1p0/2815	--	--	--	--	--	[R]	General function prediction only	YT521-B-like domain	30-kDa cleavage and polyadenylation specificity factor 30 {ECO:0000303|PubMed:18479511} OS=Arabidopsis thaliana (Mouse-ear cress) PE=1 SV=1	S	Function unknown	hypothetical protein MIMGU_mgv1a026173mg [Erythranthe guttata]
F01_cb9900_c11/f1p0/1946	--	--	Molecular Function: DNA binding (GO:0003677);; Molecular Function: sequence-specific DNA binding transcription factor activity (GO:0003700);; Cellular Component: nucleus (GO:0005634);; Biological Process: regulation of transcription, DNA-templated (GO:0006355);;	--	--	--	--	AP2 domain	Dehydration-responsive element-binding protein 1C GN=M7J2.161 OS=Arabidopsis thaliana (Mouse-ear cress) PE=2 SV=2	K	Transcription	hypothetical protein MIMGU_mgv1a025309mg [Erythranthe guttata]
F01_cb1417_c2/f1p0/3803	--	--	Molecular Function: binding (GO:0005488);;	K12885|1.70876e-40|sot:102601577|TATA-binding protein-associated factor 2N-like; K12885 heterogeneous nuclear ribonucleoprotein G (A)	ko03040:Spliceosome	[R]	General function prediction only	RNA recognition motif. (a.k.a. RRM, RBD, or RNP domain);; Zinc knuckle	Glycine-rich RNA-binding protein RZ1C {ECO:0000305} OS=Arabidopsis thaliana (Mouse-ear cress) PE=1 SV=1	S	Function unknown	PREDICTED: glycine-rich RNA-binding protein RZ1C-like isoform X1 [Sesamum indicum]
F01_cb2455_c31/f1p0/2122	--	--	Molecular Function: protein kinase activity (GO:0004672);; Cellular Component: plasma membrane (GO:0005886);;	K04424|2.43057e-163|pop:POPTR_0018s05140g|POPTRDRAFT_778792; kinase family protein; K04424 sterile alpha motif and leucine zipper containing kinase AZK [EC:2.7.11.25] (A)	--	[T]	Signal transduction mechanisms	Ethylene-responsive protein kinase Le-CTR1;; Protein kinase domain;; Protein tyrosine kinase	Serine/threonine-protein kinase EDR1 GN=F22O13.20 OS=Arabidopsis thaliana (Mouse-ear cress) PE=1 SV=1	T	Signal transduction mechanisms	hypothetical protein MIMGU_mgv1a001266mg [Erythranthe guttata]
F01_cb17510_c3/f1p0/579	--	--	Biological Process: mitotic cell cycle (GO:0000278);; Biological Process: cell fate specification (GO:0001708);; Molecular Function: cyclin-dependent protein serine/threonine kinase activity (GO:0004693);; Molecular Function: protein binding (GO:0005515);; Cellular Component: nucleus (GO:0005634);; Cellular Component: cytoplasm (GO:0005737);; Biological Process: phosphatidylinositol biosynthetic …	K02219|8.77718e-53|fve:101311839|cyclin-dependent kinases regulatory subunit 1-like; K02219 cyclin-dependent kinase regulatory subunit CKS1 (A)	--	[D]	Cell cycle control, cell division, chromosome partitioning	Cyclin-dependent kinase regulatory subunit	Cyclin-dependent kinases regulatory subunit 2 GN=CKS2 OS=Arabidopsis thaliana (Mouse-ear cress) PE=3 SV=1	T	Signal transduction mechanisms	PREDICTED: cyclin-dependent kinases regulatory subunit 1-like [Fragaria vesca subsp. vesca]
F01_cb16438_c9470/f1p0/2738	--	--	Molecular Function: translation initiation factor activity (GO:0003743);; Biological Process: translational initiation (GO:0006413);;	K11593|0|vvi:100256320|protein argonaute 1; K11593 eukaryotic translation initiation factor 2C (A)	--	[J]	Translation, ribosomal structure and biogenesis	Piwi domain;; PAZ domain;; Domain of unknown function (DUF1785)	Protein argonaute 1B GN=OSJNBa0005N02.3 OS=Oryza sativa subsp. japonica (Rice) PE=2 SV=3	J	Translation, ribosomal structure and biogenesis	hypothetical protein MIMGU_mgv1a000545mg [Erythranthe guttata]
F01_cb2484_c9/f1p0/3099	[L]	Replication, recombination and repair	Molecular Function: DNA binding (GO:0003677);; Molecular Function: ATP binding (GO:0005524);; Cellular Component: chloroplast stroma (GO:0009570);; Cellular Component: chloroplast envelope (GO:0009941);; Biological Process: chlorophyll catabolic process (GO:0015996);; Molecular Function: nucleoside-triphosphatase activity (GO:0017111);;	--	--	[L]	Replication, recombination and repair	AAA domain;; AAA domain;; AAA domain;; Part of AAA domain;; DEAD/DEAH box helicase;; Viral (Superfamily 1) RNA helicase;; Type III restriction enzyme, res subunit;; UvrD/REP helicase N-terminal domain;; Helicase;; Molybdopterin guanine dinucleotide synthesis protein B;; Flavivirus DEAD domain;; Uncharacterized conserved protein (DUF2075)	Regulator of nonsense transcripts 1 homolog GN=MQD22.15 OS=Arabidopsis thaliana (Mouse-ear cress) PE=1 SV=2	L	Replication, recombination and repair	PREDICTED: DNA-binding protein SMUBP-2 [Sesamum indicum]
F01_cb19501_c0/f3p0/1306	--	--	--	--	--	--	--	Extensin-like region	--	--	--	--
F01_cb3718_c1/f1p0/3119	--	--	Molecular Function: protein binding (GO:0005515);;	--	--	--	--	BAG domain	BAG family molecular chaperone regulator 6 GN=T3F17.11 OS=Arabidopsis thaliana (Mouse-ear cress) PE=1 SV=1	S	Function unknown	hypothetical protein MIMGU_mgv1a000977mg [Erythranthe guttata]
F01_cb4539_c2/f1p0/2681	[RTKL]	--	Molecular Function: protein kinase activity (GO:0004672);; Biological Process: cellular protein modification process (GO:0006464);;	--	--	--	--	Protein tyrosine kinase;; Protein kinase domain;; U-box domain;; Phosphotransferase enzyme family;; Universal stress protein family	Serine/threonine-protein kinase OS=Arabidopsis thaliana (Mouse-ear cress) PE=1 SV=2	T	Signal transduction mechanisms	PREDICTED: U-box domain-containing protein 35 [Sesamum indicum]
F02_cb13349_c4/f5p0/1418	[RTKL]	--	Molecular Function: protein serine/threonine kinase activity (GO:0004674);; Molecular Function: protein tyrosine kinase activity (GO:0004713);; Molecular Function: ATP binding (GO:0005524);; Biological Process: DNA repair (GO:0006281);; Biological Process: chromatin organization (GO:0006325);; Biological Process: protein phosphorylation (GO:0006468);; Biological Process: circadian rhythm (GO:0007…	K03097|0|cmo:103484833|casein kinase II subunit alpha; K03097 casein kinase II subunit alpha [EC:2.7.11.1] (A)	ko03008:Ribosome biogenesis in eukaryotes;ko04712:Circadian rhythm - plant	[TDK]	--	Protein kinase domain;; Protein tyrosine kinase;; Phosphotransferase enzyme family	Casein kinase II subunit alpha-1 (Precursor) GN=CKA1 OS=Arabidopsis thaliana (Mouse-ear cress) PE=1 SV=3	T	Signal transduction mechanisms	hypothetical protein MIMGU_mgv1a009728mg [Erythranthe guttata]
F01_cb20222_c0/f2p0/1153	[R]	General function prediction only	Molecular Function: methyltransferase activity (GO:0008168);; Biological Process: methylation (GO:0032259);; Cellular Component: intracellular organelle (GO:0043229);;	K11433|3.12629e-116|sot:102587141|histone-lysine N-methyltransferase SUVR3-like; K11433 histone-lysine N-methyltransferase SETMAR [EC:2.1.1.43] (A)	ko00310:Lysine degradation	[BK]	--	SET domain;; Pre-SET motif	Histone-lysine N-methyltransferase SUVR3 GN=F20H23.22 OS=Arabidopsis thaliana (Mouse-ear cress) PE=2 SV=3	S	Function unknown	PREDICTED: histone-lysine N-methyltransferase SUVR3 [Sesamum indicum]
F01_cb5880_c6/f1p0/2031	--	--	--	--	--	--	--	Protein of unknown function (DUF616);; Protein of unknown function (DUF616)	--	S	Function unknown	PREDICTED: uncharacterized protein LOC105159531 [Sesamum indicum]
F01_cb4381_c30/f1p0/2430	--	--	Cellular Component: intracellular (GO:0005622);;	--	--	[K]	Transcription	--	AT-rich interactive domain-containing protein 3 GN=ARID3 OS=Arabidopsis thaliana (Mouse-ear cress) PE=1 SV=1	S	Function unknown	PREDICTED: AT-rich interactive domain-containing protein 5 [Sesamum indicum]
F02_cb9228_c7/f1p0/1878	--	--	--	--	--	[R]	General function prediction only	Tub family	Tubby-like F-box protein 8 OS=Oryza sativa subsp. japonica (Rice) PE=2 SV=1	S	Function unknown	PREDICTED: tubby-like F-box protein 8 [Sesamum indicum]
F02_cb14106_c1/f2p0/1251	--	--	--	--	--	--	--	C2 domain	16 kDa phloem protein 2 GN=PP16-2 OS=Cucurbita maxima (Pumpkin) PE=1 SV=3	S	Function unknown	hypothetical protein MIMGU_mgv1a011603mg [Erythranthe guttata]
F02_cb5060_c5/f1p0/1288	--	--	--	--	--	--	--	Zn-finger in Ran binding protein and others	--	S	Function unknown	PREDICTED: zinc finger Ran-binding domain-containing protein 2 isoform X1 [Sesamum indicum]
F02_cb11098_c1/f1p0/1825	[E]	Amino acid transport and metabolism	Molecular Function: transferase activity (GO:0016740);; Biological Process: cellular metabolic process (GO:0044237);; Biological Process: primary metabolic process (GO:0044238);; Biological Process: organic substance biosynthetic process (GO:1901576);;	K01653|0|sly:101252944|acetolactate synthase small subunit 1, chloroplastic; K01653 acetolactate synthase I/III small subunit [EC:2.2.1.6] (A)	ko00290:Valine, leucine and isoleucine biosynthesis;ko00650:Butanoate metabolism;ko00660:C5-Branched dibasic acid metabolism;ko00770:Pantothenate and CoA biosynthesis;ko01210:2-Oxocarboxylic acid metabolism;ko01230:Biosynthesis of amino acids	[E]	Amino acid transport and metabolism	Small subunit of acetolactate synthase;; ACT domain;; ACT domain;; ACT domain	Acetolactate synthase small subunit 1, chloroplastic (Precursor) GN=VAT1 OS=Arabidopsis thaliana (Mouse-ear cress) PE=1 SV=1	E	Amino acid transport and metabolism	hypothetical protein MIMGU_mgv1a005187mg [Erythranthe guttata]
F02_cb1653_c7/f2p0/3665	--	--	--	K11593|0|pxb:103945132|protein argonaute 2-like; K11593 eukaryotic translation initiation factor 2C (A)	--	[J]	Translation, ribosomal structure and biogenesis	PAZ domain;; Domain of unknown function (DUF1785);; Piwi domain;; Piwi domain	Protein argonaute 2 GN=AGO2 OS=Arabidopsis thaliana (Mouse-ear cress) PE=1 SV=1	J	Translation, ribosomal structure and biogenesis	argonaute 2 [Salvia miltiorrhiza]
F02_cb4607_c5/f1p0/2837	--	--	--	--	--	--	--	CCAAT-binding transcription factor (CBF-B/NF-YA) subunit B	--	S	Function unknown	hypothetical protein MIMGU_mgv1a005717mg [Erythranthe guttata]
F01_cb11978_c0/f3p0/1790	--	--	--	--	--	--	--	--	--	S	Function unknown	PREDICTED: uncharacterized protein LOC105178674 isoform X1 [Sesamum indicum]
F02_cb4354_c4/f1p0/2760	--	--	--	--	--	--	--	Protein of unknown function, DUF288	--	S	Function unknown	PREDICTED: uncharacterized protein LOC105159757 [Sesamum indicum]
F02_cb6455_c16/f1p0/2844	[I]	Lipid transport and metabolism	Biological Process: long-chain fatty acid metabolic process (GO:0001676);; Molecular Function: long-chain fatty acid-CoA ligase activity (GO:0004467);; Cellular Component: endoplasmic reticulum (GO:0005783);; Cellular Component: Golgi apparatus (GO:0005794);; Biological Process: fatty acid biosynthetic process (GO:0006633);; Cellular Component: chloroplast envelope (GO:0009941);;	K01897|0|sot:102603429|long chain acyl-CoA synthetase 8-like; K01897 long-chain acyl-CoA synthetase [EC:6.2.1.3] (A)	ko00061:Fatty acid biosynthesis;ko00071:Fatty acid degradation;ko01212:Fatty acid metabolism;ko04146:Peroxisome	[I]	Lipid transport and metabolism	AMP-binding enzyme;; AMP-binding enzyme	Long chain acyl-CoA synthetase 8 GN=LACS8 OS=Arabidopsis thaliana (Mouse-ear cress) PE=1 SV=1	I	Lipid transport and metabolism	PREDICTED: long chain acyl-CoA synthetase 8 [Sesamum indicum]
F02_cb6746_c5/f1p0/2653	--	--	--	--	--	--	--	DNA binding protein S1FA	--	--	--	--
F01_cb1446_c5/f1p0/2838	--	--	Molecular Function: nucleotide binding (GO:0000166);; Molecular Function: nucleic acid binding (GO:0003676);; Molecular Function: zinc ion binding (GO:0008270);;	K12885|1.73512e-43|vvi:100261508|glycine-rich RNA-binding protein RZ1C; K12885 heterogeneous nuclear ribonucleoprotein G (A)	ko03040:Spliceosome	[R]	General function prediction only	Zinc knuckle;; RNA recognition motif. (a.k.a. RRM, RBD, or RNP domain)	Glycine-rich RNA-binding protein RZ1B {ECO:0000305} OS=Arabidopsis thaliana (Mouse-ear cress) PE=2 SV=1	S	Function unknown	PREDICTED: glycine-rich RNA-binding protein RZ1B-like isoform X1 [Sesamum indicum]
F01_cb5818_c6/f1p0/1172	[RTKL]	--	Biological Process: activation of MAPKK activity (GO:0000186);; Molecular Function: MAP kinase kinase kinase activity (GO:0004709);; Molecular Function: calcium ion binding (GO:0005509);; Molecular Function: ATP binding (GO:0005524);; Molecular Function: polysaccharide binding (GO:0030247);;	--	--	--	--	Protein kinase domain;; Protein tyrosine kinase;; Protein tyrosine kinase;; Protein kinase domain	Wall-associated receptor kinase 2 (Precursor) GN=WAK2 OS=Arabidopsis thaliana (Mouse-ear cress) PE=1 SV=1	T	Signal transduction mechanisms	Wall-associated kinase 2, putative [Theobroma cacao]
F01_cb19151_c1/f1p0/1415	--	--	--	--	--	--	--	TMEM192 family	--	S	Function unknown	hypothetical protein MIMGU_mgv1a008890mg [Erythranthe guttata]
F01_cb7927_c6/f1p0/2444	[U]	Intracellular trafficking, secretion, and vesicular transport	Biological Process: signal transduction (GO:0007165);; Biological Process: response to hormone (GO:0009725);; Biological Process: cellular catabolic process (GO:0044248);; Biological Process: single-organism metabolic process (GO:0044710);; Biological Process: organic substance metabolic process (GO:0071704);;	--	--	--	--	WD40-like Beta Propeller Repeat	--	U	Intracellular trafficking, secretion, and vesicular transport	hypothetical protein MIMGU_mgv1a002606mg [Erythranthe guttata]
F02_cb11362_c2/f1p0/1751	--	--	--	K08272|7.19357e-106|vvi:100249442|calcium-binding protein 39; K08272 calcium binding protein 39 (A)	--	[S]	Function unknown	Mo25-like;; Mo25-like	Putative MO25-like protein At5g47540 GN=At5g47540 OS=Arabidopsis thaliana (Mouse-ear cress) PE=2 SV=1	S	Function unknown	hypothetical protein MIMGU_mgv1a009339mg [Erythranthe guttata]
F01_cb1561_c4/f1p0/3662	[G]	Carbohydrate transport and metabolism	Molecular Function: alpha-mannosidase activity (GO:0004559);; Biological Process: mannose metabolic process (GO:0006013);; Molecular Function: zinc ion binding (GO:0008270);; Molecular Function: carbohydrate binding (GO:0030246);;	K01191|0|vvi:100259071|alpha-mannosidase; K01191 alpha-mannosidase [EC:3.2.1.24] (A)	ko00511:Other glycan degradation	[G]	Carbohydrate transport and metabolism	Glycosyl hydrolases family 38 C-terminal domain;; Glycosyl hydrolases family 38 N-terminal domain;; Alpha mannosidase, middle domain	Alpha-mannosidase, light subunit {ECO:0000303|PubMed:24221485} OS=Canavalia ensiformis (Jack bean) PE=1 SV=1	G	Carbohydrate transport and metabolism	PREDICTED: alpha-mannosidase [Sesamum indicum]
F01_cb21737_c2/f1p0/828	--	--	Molecular Function: methyltransferase activity (GO:0008168);;	--	--	[R]	General function prediction only	O-methyltransferase	Trans-resveratrol di-O-methyltransferase GN=ROMT OS=Vitis vinifera (Grape) PE=1 SV=2	S	Function unknown	O-methyltransferase [Mentha x piperita]
F02_cb5286_c3/f1p2/2721	[O]	Posttranslational modification, protein turnover, chaperones	Molecular Function: serine-type endopeptidase activity (GO:0004252);; Cellular Component: extracellular region (GO:0005576);; Biological Process: proteolysis (GO:0006508);; Molecular Function: identical protein binding (GO:0042802);; Biological Process: negative regulation of catalytic activity (GO:0043086);;	--	--	--	--	Subtilase family;; PA domain;; Peptidase inhibitor I9	Subtilisin-like protease (Precursor) GN=At5g67360 OS=Arabidopsis thaliana (Mouse-ear cress) PE=1 SV=1	O	Posttranslational modification, protein turnover, chaperones	PREDICTED: subtilisin-like protease [Sesamum indicum]
F02_cb1702_c1/f1p0/2986	--	--	Molecular Function: actin binding (GO:0003779);; Biological Process: cytoskeleton organization (GO:0007010);; Biological Process: actin filament-based process (GO:0030029);;	--	--	[Z]	Cytoskeleton	Villin headpiece domain;; Gelsolin repeat	Villin-2 {ECO:0000303|PubMed:10631247} OS=Arabidopsis thaliana (Mouse-ear cress) PE=1 SV=2	S	Function unknown	PREDICTED: villin-3 isoform X1 [Beta vulgaris subsp. vulgaris]
F02_cb5642_c25/f1p0/1965	--	--	Biological Process: regulation of transcription, DNA-templated (GO:0006355);;	--	--	--	--	GRAS domain family	Scarecrow-like protein 23 GN=SCL23 OS=Arabidopsis thaliana (Mouse-ear cress) PE=1 SV=1	K	Transcription	PREDICTED: scarecrow-like protein 23 [Sesamum indicum]
F01_cb2157_c3/f1p0/2943	--	--	--	--	--	--	--	--	--	S	Function unknown	PREDICTED: uncharacterized protein LOC105158789 [Sesamum indicum]
F01_cb16438_c37082/f1p0/3079	--	--	--	K05387|8.27851e-155|sot:102579176|glutamate receptor 2.8-like; K05387 glutamate receptor, ionotropic, plant (A)	--	[PET]	--	Receptor family ligand binding region;; Bacterial extracellular solute-binding proteins, family 3;; Ligand-gated ion channel	Glutamate receptor 2.7 (Precursor) GN=GLR2.7 OS=Arabidopsis thaliana (Mouse-ear cress) PE=2 SV=3	U	Intracellular trafficking, secretion, and vesicular transport	PREDICTED: glutamate receptor 2.2-like [Sesamum indicum]
F02_cb2361_c20/f4p0/3243	[P]	Inorganic ion transport and metabolism	Molecular Function: copper-exporting ATPase activity (GO:0004008);; Molecular Function: ATP binding (GO:0005524);; Cellular Component: chloroplast (GO:0009507);; Cellular Component: integral component of membrane (GO:0016021);; Molecular Function: metal ion binding (GO:0046872);; Biological Process: copper ion export (GO:0060003);;	K01533|0|pper:PRUPE_ppa001206mg|hypothetical protein; K01533 Cu2+-exporting ATPase [EC:3.6.3.4] (A)	--	[P]	Inorganic ion transport and metabolism	E1-E2 ATPase;; Heavy-metal-associated domain;; haloacid dehalogenase-like hydrolase;; haloacid dehalogenase-like hydrolase;; haloacid dehalogenase-like hydrolase	Copper-transporting ATPase PAA2, chloroplastic (Precursor) OS=Arabidopsis thaliana (Mouse-ear cress) PE=2 SV=1	P	Inorganic ion transport and metabolism	PREDICTED: copper-transporting ATPase PAA2, chloroplastic [Sesamum indicum]
F02_cb8305_c25/f1p0/1903	--	--	Biological Process: ion transport (GO:0006811);; Cellular Component: integral component of membrane (GO:0016021);;	--	--	[PT]	--	Cyclic nucleotide-binding domain	Cyclic nucleotide-gated ion channel 4 GN=MDK4.7 OS=Arabidopsis thaliana (Mouse-ear cress) PE=2 SV=2	U	Intracellular trafficking, secretion, and vesicular transport	PREDICTED: cyclic nucleotide-gated ion channel 4-like isoform X3 [Nicotiana sylvestris]
F02_cb13410_c20/f1p0/3812	--	--	--	--	--	[R]	General function prediction only	Leucine Rich Repeat;; Leucine Rich repeats (2 copies);; Leucine rich repeat;; Leucine Rich repeat;; Leucine rich repeat;; Leucine rich repeat N-terminal domain;; Leucine Rich Repeat;; Leucine Rich repeats (2 copies)	LRR receptor-like serine/threonine-protein kinase GSO1 (Precursor) GN=GSO1 OS=Arabidopsis thaliana (Mouse-ear cress) PE=2 SV=1	S	Function unknown	PREDICTED: receptor-like protein 12 [Pyrus x bretschneideri]
F02_cb16063_c1/f1p0/688	--	--	Cellular Component: chloroplast stroma (GO:0009570);;	--	--	--	--	--	--	S	Function unknown	PREDICTED: uncharacterized protein LOC105176722 [Sesamum indicum]
F01_cb4158_c7/f1p0/3031	[O]	Posttranslational modification, protein turnover, chaperones	Molecular Function: ATP binding (GO:0005524);; Cellular Component: cytosol (GO:0005829);; Biological Process: rRNA processing (GO:0006364);; Biological Process: protein folding (GO:0006457);; Molecular Function: unfolded protein binding (GO:0051082);;	K09495|0|vvi:100264926|T-complex protein 1 subunit gamma; K09495 T-complex protein 1 subunit gamma (A)	--	[O]	Posttranslational modification, protein turnover, chaperones	TCP-1/cpn60 chaperonin family;; TCP-1/cpn60 chaperonin family;; TCP-1/cpn60 chaperonin family	T-complex protein 1 subunit gamma {ECO:0000303|PubMed:11599560} OS=Arabidopsis thaliana (Mouse-ear cress) PE=1 SV=1	O	Posttranslational modification, protein turnover, chaperones	PREDICTED: T-complex protein 1 subunit gamma [Sesamum indicum]
F02_cb11637_c0/f1p0/1755	--	--	Biological Process: metabolic process (GO:0008152);; Biological Process: response to toxic substance (GO:0009636);; Molecular Function: cinnamate beta-D-glucosyltransferase activity (GO:0050412);; Molecular Function: limonoid glucosyltransferase activity (GO:0050645);;	--	--	[GC]	--	UDP-glucoronosyl and UDP-glucosyl transferase	Cinnamate beta-D-glucosyltransferase {ECO:0000303|PubMed:16443693, ECO:0000303|PubMed:17323078} OS=Fragaria ananassa (Strawberry) PE=1 SV=1	S	Function unknown	PREDICTED: limonoid UDP-glucosyltransferase-like [Beta vulgaris subsp. vulgaris]
F01_cb1805_c20/f1p0/3114	--	--	--	--	--	--	--	Domain of unknown function (DUF4091)	--	S	Function unknown	PREDICTED: uncharacterized protein LOC105166164 [Sesamum indicum]
F01_cb13404_c7/f1p0/417	--	--	--	--	--	--	--	Cysteine-rich TM module stress tolerance	--	--	--	PREDICTED: cysteine-rich and transmembrane domain-containing protein A-like [Sesamum indicum]
F01_cb10559_c4/f1p0/1993	--	--	Molecular Function: ubiquitin-protein transferase activity (GO:0004842);; Cellular Component: nucleus (GO:0005634);; Biological Process: ubiquitin-dependent protein catabolic process (GO:0006511);; Biological Process: multicellular organismal development (GO:0007275);; Molecular Function: zinc ion binding (GO:0008270);; Biological Process: protein ubiquitination (GO:0016567);;	K04506|0|sot:102602506|E3 ubiquitin-protein ligase SINAT3-like; K04506 E3 ubiquitin-protein ligase SIAH1 [EC:6.3.2.19] (A)	ko04120:Ubiquitin mediated proteolysis	[R]	General function prediction only	Seven in absentia protein family	E3 ubiquitin-protein ligase SINAT3 GN=SINAT3 OS=Arabidopsis thaliana (Mouse-ear cress) PE=2 SV=1	O	Posttranslational modification, protein turnover, chaperones	PREDICTED: E3 ubiquitin-protein ligase SINAT5 isoform X1 [Sesamum indicum]
F02_cb4027_c6/f1p0/2963	--	--	--	K17604|0|vvi:100264645|protein FAR1-RELATED SEQUENCE 7-like; K17604 zinc finger SWIM domain-containing protein 3 (A)	--	--	--	MULE transposase domain;; SWIM zinc finger;; FAR1 DNA-binding domain;; WRKY DNA -binding domain	Protein FAR1-RELATED SEQUENCE 5 GN=FRS5 OS=Arabidopsis thaliana (Mouse-ear cress) PE=2 SV=1	S	Function unknown	PREDICTED: protein FAR1-RELATED SEQUENCE 5-like isoform X1 [Sesamum indicum]
F01_cb6638_c1/f1p0/2493	--	--	Molecular Function: catalytic activity (GO:0003824);; Biological Process: metabolic process (GO:0008152);;	K14320|8.59656e-24|pmum:103339123|aladin; K14320 aladin (A)	ko03013:RNA transport	[R]	General function prediction only	--	Aladin {ECO:0000303|PubMed:21189294} OS=Arabidopsis thaliana (Mouse-ear cress) PE=1 SV=1	S	Function unknown	hypothetical protein MIMGU_mgv1a006768mg [Erythranthe guttata]
F01_cb4257_c5/f1p0/1972	[J]	Translation, ribosomal structure and biogenesis	Molecular Function: tRNA (5-methylaminomethyl-2-thiouridylate)-methyltransferase activity (GO:0004808);; Cellular Component: cytoplasm (GO:0005737);; Biological Process: tRNA processing (GO:0008033);; Molecular Function: sulfurtransferase activity (GO:0016783);; Biological Process: methylation (GO:0032259);;	K00566|0|sly:101266453|mitochondrial tRNA-specific 2-thiouridylase 1; K00566 tRNA-specific 2-thiouridylase [EC:2.8.1.-] (A)	ko04122:Sulfur relay system	[J]	Translation, ribosomal structure and biogenesis	tRNA methyl transferase;; Asparagine synthase	--	J	Translation, ribosomal structure and biogenesis	PREDICTED: mitochondrial tRNA-specific 2-thiouridylase 1 [Sesamum indicum]
F02_cb2099_c17/f1p0/3381	--	--	Biological Process: cellular process (GO:0009987);; Cellular Component: cytoplasmic part (GO:0044444);;	--	--	[S]	Function unknown	C3HC zinc finger-like;; Rsm1-like	--	S	Function unknown	PREDICTED: uncharacterized protein LOC105176896 [Sesamum indicum]
F01_cb8980_c44/f1p1/4612	--	--	Molecular Function: actin binding (GO:0003779);; Biological Process: cytoskeleton organization (GO:0007010);;	K05768|0|vvi:100254775|villin-4 (A)	--	[Z]	Cytoskeleton	Gelsolin repeat;; Villin headpiece domain;; Gelsolin repeat	Villin-4 {ECO:0000303|PubMed:10631247} OS=Arabidopsis thaliana (Mouse-ear cress) PE=1 SV=1	S	Function unknown	PREDICTED: villin-4-like [Sesamum indicum]
F02_cb16543_c0/f3p0/824	[O]	Posttranslational modification, protein turnover, chaperones	Cellular Component: nucleus (GO:0005634);; Biological Process: response to abscisic acid (GO:0009737);; Biological Process: embryo development ending in seed dormancy (GO:0009793);; Biological Process: protein sumoylation (GO:0016925);; Molecular Function: SUMO transferase activity (GO:0019789);;	K10577|3.86566e-108|gmx:100500268|uncharacterized LOC100500268; K10577 ubiquitin-conjugating enzyme E2 I [EC:6.3.2.19] (A)	ko03013:RNA transport;ko04120:Ubiquitin mediated proteolysis	[O]	Posttranslational modification, protein turnover, chaperones	Ubiquitin-conjugating enzyme	SUMO-conjugating enzyme SCE1 GN=T10K17.80 OS=Arabidopsis thaliana (Mouse-ear cress) PE=1 SV=1	O	Posttranslational modification, protein turnover, chaperones	SUMO-conjugating enzyme SCE1 [Morus notabilis]
F02_cb2173_c4/f1p0/3051	--	--	--	--	--	--	--	--	F-box protein SKIP14 GN=SKIP14 OS=Arabidopsis thaliana (Mouse-ear cress) PE=1 SV=1	S	Function unknown	PREDICTED: LOW QUALITY PROTEIN: F-box protein SKIP14-like [Sesamum indicum]
F02_cb9647_c190/f1p0/1650	--	--	--	--	--	[U]	Intracellular trafficking, secretion, and vesicular transport	Exocyst complex component Sec3;; Vps52 / Sac2 family;; Exocyst complex component SEC3 N-terminal PIP2 binding PH	Exocyst complex component SEC3A GN=SEC3A OS=Arabidopsis thaliana (Mouse-ear cress) PE=1 SV=1	S	Function unknown	hypothetical protein MIMGU_mgv1a001124mg [Erythranthe guttata]
F02_cb18743_c0/f1p0/973	[T]	Signal transduction mechanisms	Molecular Function: phosphorelay response regulator activity (GO:0000156);; Biological Process: phosphorelay signal transduction system (GO:0000160);; Biological Process: regulation of transcription, DNA-templated (GO:0006355);; Molecular Function: kinase activity (GO:0016301);; Biological Process: phosphorylation (GO:0016310);; Biological Process: intracellular signal transduction (GO:0035556);;	K14492|1.16254e-78|sly:101244285|two-component response regulator ARR5; K14492 two-component response regulator ARR-A family (A)	ko04075:Plant hormone signal transduction	[K]	Transcription	Response regulator receiver domain	Two-component response regulator ARR3 GN=ARR3 OS=Arabidopsis thaliana (Mouse-ear cress) PE=2 SV=1	K	Transcription	PREDICTED: two-component response regulator ARR5-like [Sesamum indicum]
F02_cb5947_c1/f1p0/1862	[O]	Posttranslational modification, protein turnover, chaperones	Biological Process: metabolic process (GO:0008152);; Molecular Function: serine-type peptidase activity (GO:0008236);;	--	--	--	--	Subtilase family	Subtilisin-like protease (Precursor) GN=At5g67360 OS=Arabidopsis thaliana (Mouse-ear cress) PE=1 SV=1	O	Posttranslational modification, protein turnover, chaperones	PREDICTED: subtilisin-like protease [Beta vulgaris subsp. vulgaris]
F01_cb16790_c3/f1p0/1330	--	--	Cellular Component: nucleus (GO:0005634);; Biological Process: ribosome biogenesis (GO:0042254);;	K14852|1.20933e-90|vvi:100252416|ribosome biogenesis regulatory protein homolog; K14852 regulator of ribosome biosynthesis (A)	--	[J]	Translation, ribosomal structure and biogenesis	Ribosome biogenesis regulatory protein (RRS1);; Ribosome biogenesis regulatory protein (RRS1)	Ribosome biogenesis regulatory protein homolog GN=At2g37990 OS=Arabidopsis thaliana (Mouse-ear cress) PE=2 SV=2	J	Translation, ribosomal structure and biogenesis	PREDICTED: ribosome biogenesis regulatory protein homolog [Sesamum indicum]
F01_cb9929_c30/f1p0/2987	[KL]	--	Cellular Component: core TFIIH complex (GO:0000439);; Molecular Function: DNA binding (GO:0003677);; Molecular Function: ATP-dependent DNA helicase activity (GO:0004003);; Molecular Function: ATP binding (GO:0005524);; Biological Process: nucleotide-excision repair (GO:0006289);;	K10843|0|vvi:100250174|DNA repair helicase XPB1; K10843 DNA excision repair protein ERCC-3 [EC:3.6.4.12] (A)	ko03022:Basal transcription factors;ko03420:Nucleotide excision repair	[KL]	--	Helicase conserved C-terminal domain;; Type III restriction enzyme, res subunit;; Helicase conserved C-terminal domain;; SNF2 family N-terminal domain	DNA repair helicase XPB1 GN=XPB1 OS=Arabidopsis thaliana (Mouse-ear cress) PE=2 SV=3	L	Replication, recombination and repair	PREDICTED: DNA repair helicase XPB1-like [Sesamum indicum]
F02_cb13117_c5/f1p0/1688	--	--	Cellular Component: Golgi membrane (GO:0000139);; Molecular Function: nucleotide-sugar transmembrane transporter activity (GO:0005338);; Cellular Component: plasma membrane (GO:0005886);; Biological Process: nucleotide-sugar transport (GO:0015780);; Cellular Component: integral component of membrane (GO:0016021);;	--	--	[GE]	--	Triose-phosphate Transporter family	UDP-galactose transporter 2 GN=UDP-GALT2 OS=Arabidopsis thaliana (Mouse-ear cress) PE=2 SV=1	S	Function unknown	PREDICTED: UDP-galactose transporter 2 [Sesamum indicum]
F01_cb21317_c1/f1p0/677	--	--	--	--	--	--	--	--	--	S	Function unknown	PREDICTED: uncharacterized protein LOC105155373 [Sesamum indicum]
F02_cb5535_c8/f1p1/2799	[R]	General function prediction only	Molecular Function: dolichyl-diphosphooligosaccharide-protein glycotransferase activity (GO:0004579);; Biological Process: protein glycosylation (GO:0006486);; Cellular Component: membrane (GO:0016020);;	K07151|0|csv:101230946|dolichyl-diphosphooligosaccharide--protein glycosyltransferase subunit STT3-like; K07151 dolichyl-diphosphooligosaccharide--protein glycosyltransferase [EC:2.4.99.18] (A)	ko00510:N-Glycan biosynthesis;ko04141:Protein processing in endoplasmic reticulum	[O]	Posttranslational modification, protein turnover, chaperones	Oligosaccharyl transferase STT3 subunit;; Oligosaccharyl transferase STT3 subunit	Dolichyl-diphosphooligosaccharide--protein glycosyltransferase subunit STT3B GN=STT3B OS=Arabidopsis thaliana (Mouse-ear cress) PE=2 SV=1	S	Function unknown	hypothetical protein MIMGU_mgv1a001976mg [Erythranthe guttata]
F02_cb824_c13/f1p0/2488	--	--	--	K10592|0|sot:102596804|E3 ubiquitin-protein ligase UPL1-like; K10592 E3 ubiquitin-protein ligase HUWE1 [EC:6.3.2.19] (A)	ko04120:Ubiquitin mediated proteolysis	[OK]	--	UBA/TS-N domain;; Ubiquitin interaction motif	E3 ubiquitin-protein ligase UPL2 GN=UPL2 OS=Arabidopsis thaliana (Mouse-ear cress) PE=1 SV=3	O	Posttranslational modification, protein turnover, chaperones	PREDICTED: E3 ubiquitin-protein ligase UPL2-like [Sesamum indicum]
F02_cb9111_c7/f1p0/1379	--	--	Biological Process: histone peptidyl-prolyl isomerization (GO:0000412);; Molecular Function: peptidyl-prolyl cis-trans isomerase activity (GO:0003755);; Molecular Function: FK506 binding (GO:0005528);; Cellular Component: nucleolus (GO:0005730);; Cellular Component: chloroplast (GO:0009507);; Cellular Component: membrane (GO:0016020);;	--	--	--	--	--	Peptidyl-prolyl cis-trans isomerase FKBP16-1, chloroplastic (Precursor) GN=FKBP16-1 OS=Arabidopsis thaliana (Mouse-ear cress) PE=2 SV=1	U	Intracellular trafficking, secretion, and vesicular transport	PREDICTED: peptidyl-prolyl cis-trans isomerase FKBP16-1, chloroplastic [Sesamum indicum]
F02_cb9860_c4/f1p0/1841	--	--	--	--	--	--	--	Exonuclease	Protein NEN1 {ECO:0000303|PubMed:25081480} OS=Arabidopsis thaliana (Mouse-ear cress) PE=2 SV=1	S	Function unknown	PREDICTED: protein NEN1-like [Sesamum indicum]
F01_cb15045_c5/f1p0/1496	--	--	Molecular Function: glutathione transferase activity (GO:0004364);; Cellular Component: peroxisome (GO:0005777);; Biological Process: toxin catabolic process (GO:0009407);; Biological Process: response to cyclopentenone (GO:0010583);;	K00799|9.9757e-67|pop:POPTR_0003s12590g|POPTRDRAFT_817349; glutathione S-transferase family protein; K00799 glutathione S-transferase [EC:2.5.1.18] (A)	ko00480:Glutathione metabolism	[O]	Posttranslational modification, protein turnover, chaperones	Glutathione S-transferase, N-terminal domain;; Glutathione S-transferase, N-terminal domain;; Glutathione S-transferase, N-terminal domain	Glutathione S-transferase T1 GN=MEE6.28 OS=Arabidopsis thaliana (Mouse-ear cress) PE=2 SV=1	O	Posttranslational modification, protein turnover, chaperones	PREDICTED: glutathione S-transferase T1-like [Sesamum indicum]
F02_cb11041_c3588/f1p1/1920	[O]	Posttranslational modification, protein turnover, chaperones	Molecular Function: metalloendopeptidase activity (GO:0004222);; Molecular Function: ATP binding (GO:0005524);; Biological Process: proteolysis (GO:0006508);; Cellular Component: membrane (GO:0016020);; Molecular Function: nucleoside-triphosphatase activity (GO:0017111);; Biological Process: protein catabolic process (GO:0030163);;	K03798|0|mdm:103444102|ATP-dependent zinc metalloprotease FTSH 2, chloroplastic-like; K03798 cell division protease FtsH [EC:3.4.24.-] (A)	--	[O]	Posttranslational modification, protein turnover, chaperones	Peptidase family M41;; ATPase family associated with various cellular activities (AAA);; TIP49 C-terminus;; AAA domain (dynein-related subfamily);; Holliday junction DNA helicase ruvB N-terminus	ATP-dependent zinc metalloprotease FTSH 2, chloroplastic (Precursor) GN=F7F1.16 OS=Arabidopsis thaliana (Mouse-ear cress) PE=1 SV=1	O	Posttranslational modification, protein turnover, chaperones	PREDICTED: ATP-dependent zinc metalloprotease FTSH 2, chloroplastic-like [Malus domestica]
F02_cb3872_c1/f1p0/2081	--	--	--	--	--	--	--	--	--	S	Function unknown	PREDICTED: uncharacterized protein LOC105175059 [Sesamum indicum]
F01_cb2206_c0/f1p0/3524	--	--	Molecular Function: monooxygenase activity (GO:0004497);; Cellular Component: integral component of membrane (GO:0016021);;	--	--	[T]	Signal transduction mechanisms	UBX domain	Cytochrome b561 and DOMON domain-containing protein At2g04850 (Precursor) GN=At2g04850 OS=Arabidopsis thaliana (Mouse-ear cress) PE=2 SV=2	S	Function unknown	PREDICTED: cytochrome b561 and DOMON domain-containing protein At2g04850 [Sesamum indicum]
F01_cb12038_c1/f1p0/1806	--	--	Biological Process: terpenoid metabolic process (GO:0006721);; Biological Process: isoprenoid biosynthetic process (GO:0008299);; Molecular Function: terpene synthase activity (GO:0010333);;	--	--	--	--	Terpene synthase family, metal binding domain;; Terpene synthase family, metal binding domain	Gamma-curcumene synthase OS=Pogostemon cablin (Patchouli) PE=1 SV=1	S	Function unknown	PREDICTED: gamma-cadinene synthase-like, partial [Sesamum indicum]
F02_cb11811_c3/f1p0/1134	[C]	Energy production and conversion	Molecular Function: oxidoreductase activity, acting on the aldehyde or oxo group of donors, NAD or NADP as acceptor (GO:0016620);; Biological Process: oxidation-reduction process (GO:0055114);;	K00131|4.48394e-161|mtr:MTR_4g131180|NADP-dependent glyceraldehyde-3-phosphate dehydrogenase; K00131 glyceraldehyde-3-phosphate dehydrogenase (NADP+) [EC:1.2.1.9] (A)	ko00010:Glycolysis / Gluconeogenesis;ko00030:Pentose phosphate pathway;ko01200:Carbon metabolism	[C]	Energy production and conversion	Aldehyde dehydrogenase family	NADP-dependent glyceraldehyde-3-phosphate dehydrogenase GN=GAPN OS=Triticum aestivum (Wheat) PE=1 SV=2	C	Energy production and conversion	PREDICTED: NADP-dependent glyceraldehyde-3-phosphate dehydrogenase [Sesamum indicum]
F01_cb12318_c5/f1p2/1680	--	--	Biological Process: lipid metabolic process (GO:0006629);; Molecular Function: phosphoric diester hydrolase activity (GO:0008081);;	--	--	--	--	--	PI-PLC X domain-containing protein At5g67130 (Precursor) GN=At5g67130 OS=Arabidopsis thaliana (Mouse-ear cress) PE=1 SV=1	S	Function unknown	PREDICTED: PI-PLC X domain-containing protein At5g67130 [Sesamum indicum]
F02_cb6789_c0/f1p0/2477	--	--	--	--	--	--	--	Plant mobile domain	--	S	Function unknown	PREDICTED: uncharacterized protein LOC103934828 [Pyrus x bretschneideri]
F01_cb13061_c3/f1p0/1124	--	--	Biological Process: mRNA splicing, via spliceosome (GO:0000398);; Cellular Component: U12-type spliceosomal complex (GO:0005689);;	K12834|2.31641e-71|pop:POPTR_0001s28440g|POPTRDRAFT_706561; hypothetical protein; K12834 PHD finger-like domain-containing protein 5A (A)	ko03040:Spliceosome	[S]	Function unknown	PHF5-like protein	PHD finger-like domain-containing protein 5B GN=At1g07170 OS=Arabidopsis thaliana (Mouse-ear cress) PE=2 SV=1	A	RNA processing and modification	hypothetical protein POPTR_0001s28440g [Populus trichocarpa]
F02_cb15106_c31/f1p0/1168	--	--	--	--	--	--	--	--	--	S	Function unknown	hypothetical protein ACLA_028940 [Aspergillus clavatus NRRL 1]
F02_cb1453_c2/f1p0/3213	--	--	Biological Process: transport (GO:0006810);; Biological Process: cellular process (GO:0009987);; Biological Process: single-organism process (GO:0044699);;	--	--	[U]	Intracellular trafficking, secretion, and vesicular transport	Region in Clathrin and VPS;; Pep3/Vps18/deep orange family;; Pep3/Vps18/deep orange family	--	U	Intracellular trafficking, secretion, and vesicular transport	PREDICTED: vacuolar protein sorting-associated protein 18 homolog isoform X1 [Solanum tuberosum]
F01_cb16313_c0/f1p0/1283	--	--	--	--	--	--	--	No apical meristem (NAM) protein	Putative NAC domain-containing protein 94 GN=ANAC094 OS=Arabidopsis thaliana (Mouse-ear cress) PE=3 SV=1	S	Function unknown	PREDICTED: putative NAC domain-containing protein 94 [Sesamum indicum]
F01_cb16438_c61165/f1p4/1765	[J]	Translation, ribosomal structure and biogenesis	Molecular Function: translation elongation factor activity (GO:0003746);; Molecular Function: GTPase activity (GO:0003924);; Molecular Function: GTP binding (GO:0005525);; Cellular Component: nucleolus (GO:0005730);; Cellular Component: mitochondrion (GO:0005739);; Cellular Component: vacuole (GO:0005773);; Cellular Component: plasma membrane (GO:0005886);; Biological Process: GTP catabolic proce…	K03231|0|osa:4331813|Os03g0178000; K03231 elongation factor 1-alpha (A)	ko03013:RNA transport	[J]	Translation, ribosomal structure and biogenesis	Elongation factor Tu GTP binding domain;; Elongation factor Tu C-terminal domain;; Elongation factor Tu domain 2	Elongation factor 1-alpha GN=REFA4 OS=Oryza sativa subsp. japonica (Rice) PE=2 SV=2	J	Translation, ribosomal structure and biogenesis	translation elongation factor 1A-9 [Gossypium hirsutum]
F01_cb13705_c0/f2p0/701	--	--	--	--	--	--	--	--	--	S	Function unknown	PREDICTED: uncharacterized protein LOC105173526 [Sesamum indicum]
F01_cb16438_c46242/f1p0/2408	[J]	Translation, ribosomal structure and biogenesis	Cellular Component: ribosome (GO:0005840);; Cellular Component: chloroplast (GO:0009507);; Molecular Function: rRNA binding (GO:0019843);; Biological Process: ribosome biogenesis (GO:0042254);;	K02864|2.47021e-106|sly:101256669|50S ribosomal protein L10, chloroplastic; K02864 large subunit ribosomal protein L10 (A)	ko03010:Ribosome	--	--	Ribosomal protein L10	50S ribosomal protein L10, chloroplastic (Precursor) GN=RPL10 OS=Nicotiana tabacum (Common tobacco) PE=2 SV=1	J	Translation, ribosomal structure and biogenesis	PREDICTED: 50S ribosomal protein L10, chloroplastic [Sesamum indicum]
F01_cb20207_c1/f2p1/1070	--	--	Cellular Component: plasma membrane (GO:0005886);; Biological Process: transport (GO:0006810);; Biological Process: cell-cell signaling (GO:0007267);; Molecular Function: galacturonate binding (GO:0048032);;	--	--	--	--	Remorin, C-terminal region;; Remorin, N-terminal region	Remorin OS=Solanum tuberosum (Potato) PE=1 SV=1	S	Function unknown	PREDICTED: remorin-like [Sesamum indicum]
F02_cb11041_c74583/f1p0/2696	--	--	--	--	--	[T]	Signal transduction mechanisms	NB-ARC domain;; NB-ARC domain	Putative late blight resistance protein homolog R1B-14 GN=R1B-14 OS=Solanum demissum (Wild potato) PE=3 SV=1	S	Function unknown	hypothetical protein MIMGU_mgv1a001060mg [Erythranthe guttata]
F02_cb5800_c11/f1p0/1622	[I]	Lipid transport and metabolism	Molecular Function: farnesyl-diphosphate farnesyltransferase activity (GO:0004310);; Biological Process: lipid biosynthetic process (GO:0008610);; Cellular Component: integral component of membrane (GO:0016021);; Molecular Function: squalene synthase activity (GO:0051996);;	K00801|0|pmum:103335730|squalene synthase-like; K00801 farnesyl-diphosphate farnesyltransferase [EC:2.5.1.21] (A)	ko00100:Steroid biosynthesis;ko00909:Sesquiterpenoid and triterpenoid biosynthesis	[I]	Lipid transport and metabolism	Squalene/phytoene synthase	Squalene synthase OS=Nicotiana benthamiana PE=2 SV=1	I	Lipid transport and metabolism	PREDICTED: squalene synthase-like [Sesamum indicum]
F01_cb11206_c4/f2p3/1805	--	--	Molecular Function: ATP binding (GO:0005524);; Molecular Function: kinase activity (GO:0016301);; Biological Process: phosphorylation (GO:0016310);;	--	--	--	--	Zeta toxin	--	S	Function unknown	hypothetical protein MIMGU_mgv1a004476mg [Erythranthe guttata]
F02_cb9790_c1/f1p0/2036	[C]	Energy production and conversion	Biological Process: malate metabolic process (GO:0006108);; Cellular Component: chloroplast (GO:0009507);; Molecular Function: L-malate dehydrogenase activity (GO:0030060);; Biological Process: cellular carbohydrate metabolic process (GO:0044262);; Biological Process: oxidation-reduction process (GO:0055114);;	K00026|0|tcc:TCM_014018|Malate dehydrogenase; K00026 malate dehydrogenase [EC:1.1.1.37] (A)	ko00020:Citrate cycle (TCA cycle);ko00270:Cysteine and methionine metabolism;ko00620:Pyruvate metabolism;ko00630:Glyoxylate and dicarboxylate metabolism;ko00710:Carbon fixation in photosynthetic organisms;ko01200:Carbon metabolism	[C]	Energy production and conversion	lactate/malate dehydrogenase, NAD binding domain;; lactate/malate dehydrogenase, alpha/beta C-terminal domain;; 3-beta hydroxysteroid dehydrogenase/isomerase family	Malate dehydrogenase, chloroplastic (Precursor) GN=At3g47520 OS=Arabidopsis thaliana (Mouse-ear cress) PE=1 SV=1	C	Energy production and conversion	PREDICTED: malate dehydrogenase, chloroplastic-like [Sesamum indicum]
F01_cb14566_c1/f1p0/1730	--	--	--	--	--	[R]	General function prediction only	gag-polypeptide of LTR copia-type;; gag-polypeptide of LTR copia-type;; gag-polypeptide of LTR copia-type;; Retrotransposon gag protein	--	L	Replication, recombination and repair	hypothetical protein VITISV_032383 [Vitis vinifera]
F01_cb15442_c3/f1p0/836	[S]	Function unknown	Cellular Component: mitochondrion (GO:0005739);;	--	--	--	--	Protein of unknown function (DUF971)	--	S	Function unknown	hypothetical protein MIMGU_mgv1a016011mg [Erythranthe guttata]
F02_cb3366_c7/f1p0/1957	[I]	Lipid transport and metabolism	--	--	--	[I]	Lipid transport and metabolism	MaoC like domain;; N-terminal half of MaoC dehydratase;; Methyltransferase domain	Cycloartenol-C-24-methyltransferase GN=MSH12.18 OS=Arabidopsis thaliana (Mouse-ear cress) PE=1 SV=1	I	Lipid transport and metabolism	hypothetical protein MIMGU_mgv1a014865mg [Erythranthe guttata]
F02_cb18288_c1/f1p0/792	[R]	General function prediction only	Molecular Function: RNA binding (GO:0003723);; Molecular Function: copper ion binding (GO:0005507);; Molecular Function: ATP binding (GO:0005524);; Cellular Component: mitochondrion (GO:0005739);; Biological Process: protein targeting to mitochondrion (GO:0006626);; Biological Process: pyrimidine ribonucleotide biosynthetic process (GO:0009220);; Biological Process: regulation of flower developme…	K12741|1.11592e-27|cit:102625620|glycine-rich RNA-binding protein 3, mitochondrial-like; K12741 heterogeneous nuclear ribonucleoprotein A1/A3 (A)	ko03040:Spliceosome	[R]	General function prediction only	RNA recognition motif. (a.k.a. RRM, RBD, or RNP domain);; RNA recognition motif (a.k.a. RRM, RBD, or RNP domain);; RNA recognition motif. (a.k.a. RRM, RBD, or RNP domain)	Glycine-rich RNA-binding protein 3, mitochondrial (Precursor) GN=MAF19_30 OS=Arabidopsis thaliana (Mouse-ear cress) PE=2 SV=1	S	Function unknown	PREDICTED: glycine-rich RNA-binding protein 2, mitochondrial-like [Sesamum indicum]
F02_cb12229_c2/f1p0/1567	[S]	Function unknown	--	--	--	--	--	Bestrophin, RFP-TM, chloride channel	UPF0187 protein At3g61320, chloroplastic (Precursor) GN=At3g61320 OS=Arabidopsis thaliana (Mouse-ear cress) PE=2 SV=2	S	Function unknown	PREDICTED: UPF0187 protein At3g61320, chloroplastic [Sesamum indicum]
F02_cb3539_c11/f1p0/3191	--	--	--	--	--	--	--	--	F-box protein At1g11270 GN=At1g11270 OS=Arabidopsis thaliana (Mouse-ear cress) PE=2 SV=1	--	--	hypothetical protein MIMGU_mgv1a020877mg, partial [Erythranthe guttata]
F02_cb6809_c1/f1p0/2494	[V]	Defense mechanisms	Molecular Function: transferase activity (GO:0016740);; Biological Process: methylation (GO:0032259);;	K11420|0|sot:102587095|histone-lysine N-methyltransferase, H3 lysine-9 specific SUVH4-like; K11420 euchromatic histone-lysine N-methyltransferase [EC:2.1.1.43] (A)	ko00310:Lysine degradation	[BK]	--	SAD/SRA domain;; Pre-SET motif;; SET domain	Histone-lysine N-methyltransferase, H3 lysine-9 specific SUVH4 GN=MAC12.7 OS=Arabidopsis thaliana (Mouse-ear cress) PE=1 SV=2	S	Function unknown	PREDICTED: histone-lysine N-methyltransferase, H3 lysine-9 specific SUVH4 [Sesamum indicum]
F01_cb720_c1/f1p0/3140	--	--	--	--	--	--	--	--	Putative disease resistance protein RGA4 GN=RGA4 OS=Solanum bulbocastanum (Wild potato) PE=2 SV=1	S	Function unknown	hypothetical protein MIMGU_mgv1a000452mg [Erythranthe guttata]
F01_cb3298_c19/f1p0/1426	--	--	Biological Process: signal transduction (GO:0007165);; Biological Process: response to hormone (GO:0009725);; Molecular Function: transferase activity, transferring phosphorus-containing groups (GO:0016772);; Biological Process: response to oxygen-containing compound (GO:1901700);;	--	--	[T]	Signal transduction mechanisms	--	--	T	Signal transduction mechanisms	hypothetical protein CICLE_v10015597mg [Citrus clementina]
F01_cb9460_c3/f1p0/1980	[J]	Translation, ribosomal structure and biogenesis	Molecular Function: RNA binding (GO:0003723);; Molecular Function: structural constituent of ribosome (GO:0003735);; Cellular Component: endosome (GO:0005768);; Cellular Component: Golgi apparatus (GO:0005794);; Cellular Component: trans-Golgi network (GO:0005802);; Cellular Component: ribosome (GO:0005840);; Biological Process: translation (GO:0006412);; Biological Process: pyrimidine ribonucleo…	K02988|5.00699e-169|mdm:103424423|uncharacterized LOC103424423; K02988 small subunit ribosomal protein S5 (A)	ko03010:Ribosome	[J]	Translation, ribosomal structure and biogenesis	Ribosomal protein S5, C-terminal domain;; Ribosomal protein S5, N-terminal domain	30S ribosomal protein S5, chloroplastic GN=rps5 OS=Odontella sinensis (Marine centric diatom) PE=3 SV=1	J	Translation, ribosomal structure and biogenesis	PREDICTED: putative golgin subfamily A member 6-like protein 6 [Sesamum indicum]
F02_cb10831_c3/f1p0/1630	[R]	General function prediction only	Molecular Function: histone acetyltransferase activity (GO:0004402);; Cellular Component: nucleus (GO:0005634);; Biological Process: DNA repair (GO:0006281);; Biological Process: response to UV-B (GO:0010224);; Biological Process: histone acetylation (GO:0016573);;	K10570|0|pper:PRUPE_ppa005733mg|hypothetical protein; K10570 DNA excision repair protein ERCC-8 (A)	ko03420:Nucleotide excision repair;ko04120:Ubiquitin mediated proteolysis	[KL]	--	WD domain, G-beta repeat	WD-40 repeat-containing protein MSI2 GN=MSI2 OS=Arabidopsis thaliana (Mouse-ear cress) PE=2 SV=1	L	Replication, recombination and repair	PREDICTED: DNA excision repair protein ERCC-8 isoform X1 [Beta vulgaris subsp. vulgaris]
F02_cb3629_c25/f1p0/961	--	--	--	--	--	[K]	Transcription	--	Homeobox protein BEL1 homolog GN=MYC6.12 OS=Arabidopsis thaliana (Mouse-ear cress) PE=1 SV=2	K	Transcription	POX family protein isoform 1 [Theobroma cacao]
F01_cb3476_c2/f1p0/3183	[G]	Carbohydrate transport and metabolism	Molecular Function: transferase activity, transferring phosphorus-containing groups (GO:0016772);;	--	--	--	--	--	Fructokinase-like 1, chloroplastic {ECO:0000312|EMBL:AEE79187.1} (Precursor) OS=Arabidopsis thaliana (Mouse-ear cress) PE=1 SV=1	G	Carbohydrate transport and metabolism	hypothetical protein MIMGU_mgv1a005440mg [Erythranthe guttata]
F01_cb2404_c1/f1p0/3434	[G]	Carbohydrate transport and metabolism	Biological Process: carbohydrate metabolic process (GO:0005975);; Molecular Function: hydrolase activity, acting on glycosyl bonds (GO:0016798);; Biological Process: cellular macromolecule metabolic process (GO:0044260);; Biological Process: single-organism process (GO:0044699);;	K12309|1.37983e-107|sot:102586853|beta-galactosidase 17-like; K12309 beta-galactosidase [EC:3.2.1.23] (A)	ko00052:Galactose metabolism;ko00511:Other glycan degradation;ko00531:Glycosaminoglycan degradation;ko00600:Sphingolipid metabolism;ko00604:Glycosphingolipid biosynthesis - ganglio series	[G]	Carbohydrate transport and metabolism	Beta-galactosidase jelly roll domain	Beta-galactosidase 8 (Precursor) GN=OSJNBa0052K01.15 OS=Oryza sativa subsp. japonica (Rice) PE=2 SV=1	G	Carbohydrate transport and metabolism	PREDICTED: beta-galactosidase 17 isoform X1 [Sesamum indicum]
F01_cb4030_c10/f1p0/2074	--	--	--	--	--	[L]	Replication, recombination and repair	Domain of unknown function (DUF4413);; hAT family C-terminal dimerisation region;; hAT family C-terminal dimerisation region	Zinc finger BED domain-containing protein RICESLEEPER 2 OS=Oryza sativa subsp. japonica (Rice) PE=2 SV=1	S	Function unknown	PREDICTED: zinc finger BED domain-containing protein RICESLEEPER 2-like [Beta vulgaris subsp. vulgaris]
F01_cb16171_c8/f6p1/1055	[J]	Translation, ribosomal structure and biogenesis	Molecular Function: RNA binding (GO:0003723);; Molecular Function: structural constituent of ribosome (GO:0003735);; Biological Process: translation (GO:0006412);; Cellular Component: small ribosomal subunit (GO:0015935);;	K02985|4.75012e-152|gmx:100799156|40S ribosomal protein S3-3-like; K02985 small subunit ribosomal protein S3e (A)	ko03010:Ribosome	[J]	Translation, ribosomal structure and biogenesis	Ribosomal protein S3, C-terminal domain;; KH domain	40S ribosomal protein S3-3 GN=RPS3C OS=Arabidopsis thaliana (Mouse-ear cress) PE=1 SV=1	J	Translation, ribosomal structure and biogenesis	PREDICTED: 40S ribosomal protein S3-3-like [Sesamum indicum]
F02_cb6135_c20/f1p3/2703	[E]	Amino acid transport and metabolism	Molecular Function: serine-type peptidase activity (GO:0008236);;	K01322|0|cit:102627435|prolyl endopeptidase-like; K01322 prolyl oligopeptidase [EC:3.4.21.26] (A)	--	[O]	Posttranslational modification, protein turnover, chaperones	Prolyl oligopeptidase, N-terminal beta-propeller domain;; Prolyl oligopeptidase family;; Prolyl oligopeptidase, N-terminal beta-propeller domain	--	E	Amino acid transport and metabolism	PREDICTED: prolyl endopeptidase-like [Sesamum indicum]
F02_cb9167_c8/f1p0/1796	--	--	--	K00901|0|sly:101264835|diacylglycerol kinase 7; K00901 diacylglycerol kinase (ATP) [EC:2.7.1.107] (A)	ko00561:Glycerolipid metabolism;ko00564:Glycerophospholipid metabolism;ko04070:Phosphatidylinositol signaling system	[IT]	--	Diacylglycerol kinase catalytic domain;; Diacylglycerol kinase accessory domain	Diacylglycerol kinase 3 GN=DGK3 OS=Arabidopsis thaliana (Mouse-ear cress) PE=2 SV=1	I	Lipid transport and metabolism	PREDICTED: diacylglycerol kinase 3-like [Sesamum indicum]
F02_cb6382_c0/f16p2/2503	--	--	Biological Process: lipid metabolic process (GO:0006629);; Molecular Function: O-acyltransferase activity (GO:0008374);; Molecular Function: phospholipid:diacylglycerol acyltransferase activity (GO:0046027);;	K00679|0|pop:POPTR_0003s06140g|POPTRDRAFT_854288; lecithin:cholesterol acyltransferase family protein; K00679 phospholipid:diacylglycerol acyltransferase [EC:2.3.1.158] (A)	ko00561:Glycerolipid metabolism	[I]	Lipid transport and metabolism	Lecithin:cholesterol acyltransferase	Phospholipid:diacylglycerol acyltransferase 1 OS=Arabidopsis thaliana (Mouse-ear cress) PE=2 SV=1	S	Function unknown	PREDICTED: phospholipid:diacylglycerol acyltransferase 1-like [Sesamum indicum]
F02_cb13405_c35/f1p0/692	--	--	Cellular Component: cytoplasm (GO:0005737);; Biological Process: galactose metabolic process (GO:0006012);; Biological Process: raffinose family oligosaccharide biosynthetic process (GO:0010325);; Molecular Function: metal ion binding (GO:0046872);; Molecular Function: inositol 3-alpha-galactosyltransferase activity (GO:0047216);; Biological Process: carbohydrate storage (GO:0052576);; Biological…	K18819|5.92624e-66|atr:s00096p00114120|AMTR_s00096p00114120; hypothetical protein; K18819 inositol 3-alpha-galactosyltransferase [EC:2.4.1.123] (A)	ko00052:Galactose metabolism	[G]	Carbohydrate transport and metabolism	Glycosyl transferase family 8	Galactinol synthase 1 GN=GOLS1 OS=Ajuga reptans (Bugle) PE=1 SV=1	O	Posttranslational modification, protein turnover, chaperones	PREDICTED: galactinol synthase 1-like [Sesamum indicum]
F01_cb9618_c5/f1p1/2026	--	--	Molecular Function: magnesium ion transmembrane transporter activity (GO:0015095);; Biological Process: magnesium ion transport (GO:0015693);; Cellular Component: membrane (GO:0016020);;	--	--	[S]	Function unknown	Magnesium transporter NIPA	Probable magnesium transporter NIPA8 GN=At3g26670 OS=Arabidopsis thaliana (Mouse-ear cress) PE=2 SV=1	S	Function unknown	hypothetical protein MIMGU_mgv1a006503mg [Erythranthe guttata]
F01_cb1108_c4/f1p0/2884	--	--	--	--	--	[YU]	--	--	--	S	Function unknown	PREDICTED: exportin-4 isoform X2 [Sesamum indicum]
F01_cb19793_c0/f2p0/442	--	--	--	K09481|2.30727e-23|csv:101220008|protein transport protein Sec61 subunit beta-like; K09481 protein transport protein SEC61 subunit beta (A)	ko03060:Protein export;ko04141:Protein processing in endoplasmic reticulum;ko04145:Phagosome	[O]	Posttranslational modification, protein turnover, chaperones	Sec61beta family	Protein transport protein Sec61 subunit beta GN=At2g45070 OS=Arabidopsis thaliana (Mouse-ear cress) PE=1 SV=1	U	Intracellular trafficking, secretion, and vesicular transport	PREDICTED: protein transport protein Sec61 subunit beta-like isoform 1 [Cucumis sativus]
F02_cb3346_c0/f1p0/3154	--	--	--	--	--	[KTDL]	--	--	--	S	Function unknown	hypothetical protein MIMGU_mgv1a022848mg, partial [Erythranthe guttata]
F01_cb21260_c0/f1p1/642	[G]	Carbohydrate transport and metabolism	Biological Process: MAPK cascade (GO:0000165);; Molecular Function: ribose-5-phosphate isomerase activity (GO:0004751);; Biological Process: glycine catabolic process (GO:0006546);; Biological Process: tryptophan catabolic process (GO:0006569);; Biological Process: protein targeting to membrane (GO:0006612);; Biological Process: unsaturated fatty acid biosynthetic process (GO:0006636);; Biologica…	K01807|3.08405e-22|sot:102588569|probable ribose-5-phosphate isomerase-like; K01807 ribose 5-phosphate isomerase A [EC:5.3.1.6] (A)	ko00030:Pentose phosphate pathway;ko00710:Carbon fixation in photosynthetic organisms;ko01200:Carbon metabolism;ko01230:Biosynthesis of amino acids	[G]	Carbohydrate transport and metabolism	--	Probable ribose-5-phosphate isomerase 3, chloroplastic (Precursor) OS=Arabidopsis thaliana (Mouse-ear cress) PE=1 SV=1	G	Carbohydrate transport and metabolism	PREDICTED: probable ribose-5-phosphate isomerase 3, chloroplastic [Sesamum indicum]
F02_cb12632_c5/f1p0/1423	[H]	Coenzyme transport and metabolism	Biological Process: lipoate biosynthetic process (GO:0009107);; Biological Process: protein lipoylation (GO:0009249);; Cellular Component: chloroplast (GO:0009507);; Molecular Function: lipoate synthase activity (GO:0016992);; Molecular Function: metal ion binding (GO:0046872);; Molecular Function: 4 iron, 4 sulfur cluster binding (GO:0051539);;	K03644|6.95502e-170|sly:101257453|lipoyl synthase, chloroplastic; K03644 lipoic acid synthetase [EC:2.8.1.8] (A)	ko00785:Lipoic acid metabolism	[H]	Coenzyme transport and metabolism	Radical SAM superfamily	Lipoyl synthase, chloroplastic {ECO:0000255|HAMAP-Rule:MF_03129} (Precursor) OS=Ricinus communis (Castor bean) PE=3 SV=1	H	Coenzyme transport and metabolism	PREDICTED: lipoyl synthase, chloroplastic [Solanum lycopersicum]
F02_cb346_c0/f2p2/4509	[I]	Lipid transport and metabolism	--	--	--	[R]	General function prediction only	NAD binding domain of 6-phosphogluconate dehydrogenase;; NAD-binding of NADP-dependent 3-hydroxyisobutyrate dehydrogenase;; NADP oxidoreductase coenzyme F420-dependent;; UDP-glucose/GDP-mannose dehydrogenase family, NAD binding domain;; Fructose-bisphosphate aldolase class-II;; Protein of unknown function, DUF1537	Probable 3-hydroxyisobutyrate dehydrogenase, mitochondrial (Precursor) GN=At4g20930 OS=Arabidopsis thaliana (Mouse-ear cress) PE=2 SV=3	S	Function unknown	PREDICTED: uncharacterized protein LOC105158074 [Sesamum indicum]
F01_cb9746_c10/f8p0/2117	--	--	Biological Process: protein N-linked glycosylation (GO:0006487);; Cellular Component: integral component of membrane (GO:0016021);; Molecular Function: glycoprotein 3-alpha-L-fucosyltransferase activity (GO:0018392);; Cellular Component: Golgi cisterna membrane (GO:0032580);; Biological Process: fucosylation (GO:0036065);;	K00753|0|vvi:100255469|putative fucosyltransferase-like protein; K00753 glycoprotein 3-alpha-L-fucosyltransferase [EC:2.4.1.214] (A)	--	[GE]	--	Glycosyltransferase family 10 (fucosyltransferase)	Putative fucosyltransferase-like protein GN=FUT12 OS=Arabidopsis thaliana (Mouse-ear cress) PE=2 SV=1	S	Function unknown	PREDICTED: glycoprotein 3-alpha-L-fucosyltransferase A [Sesamum indicum]
F01_cb19682_c1756/f1p2/865	--	--	--	--	--	--	--	Dirigent-like protein	Dirigent protein 1 (Precursor) GN=DIR1 OS=Arabidopsis thaliana (Mouse-ear cress) PE=2 SV=1	S	Function unknown	PREDICTED: dirigent protein 22-like [Sesamum indicum]
F02_cb11443_c1/f1p0/1788	[J]	Translation, ribosomal structure and biogenesis	Biological Process: rRNA processing (GO:0006364);; Biological Process: translational termination (GO:0006415);; Cellular Component: chloroplast stroma (GO:0009570);; Biological Process: chloroplast relocation (GO:0009902);; Biological Process: leaf morphogenesis (GO:0009965);; Biological Process: thylakoid membrane organization (GO:0010027);; Biological Process: photosystem II assembly (GO:001020…	K02836|0|vvi:100265078|peptide chain release factor PrfB1, chloroplastic; K02836 peptide chain release factor 2 (A)	--	[J]	Translation, ribosomal structure and biogenesis	RF-1 domain;; PCRF domain	Peptide chain release factor PrfB1, chloroplastic {ECO:0000303|PubMed:21771930} (Precursor) OS=Arabidopsis thaliana (Mouse-ear cress) PE=2 SV=1	J	Translation, ribosomal structure and biogenesis	PREDICTED: peptide chain release factor PrfB1, chloroplastic [Sesamum indicum]
F01_cb16438_c10450/f1p0/3003	[E]	Amino acid transport and metabolism	Molecular Function: serine-type endopeptidase activity (GO:0004252);; Biological Process: proteolysis (GO:0006508);; Molecular Function: serine-type exopeptidase activity (GO:0070008);;	K01322|0|sot:102598534|prolyl endopeptidase-like; K01322 prolyl oligopeptidase [EC:3.4.21.26] (A)	--	[O]	Posttranslational modification, protein turnover, chaperones	Prolyl oligopeptidase, N-terminal beta-propeller domain;; Prolyl oligopeptidase, N-terminal beta-propeller domain;; Prolyl oligopeptidase family	--	E	Amino acid transport and metabolism	PREDICTED: prolyl endopeptidase-like [Sesamum indicum]
F02_cb19010_c0/f2p0/1232	--	--	--	--	--	--	--	Zinc finger, C3HC4 type (RING finger)	--	S	Function unknown	hypothetical protein MIMGU_mgv1a011982mg [Erythranthe guttata]
F01_cb8053_c2/f1p0/1662	--	--	--	--	--	--	--	Salt stress response/antifungal;; Protein tyrosine kinase;; Protein kinase domain;; Salt stress response/antifungal	Cysteine-rich receptor-like protein kinase 10 (Precursor) GN=F21P8.70 OS=Arabidopsis thaliana (Mouse-ear cress) PE=1 SV=3	T	Signal transduction mechanisms	receptor-like protein kinase [Glycine max]
F01_cb21948_c2/f1p0/1210	[G]	Carbohydrate transport and metabolism	Molecular Function: hydrolase activity, hydrolyzing O-glycosyl compounds (GO:0004553);; Cellular Component: cell wall (GO:0005618);; Biological Process: cellular glucan metabolic process (GO:0006073);; Molecular Function: xyloglucan:xyloglucosyl transferase activity (GO:0016762);; Cellular Component: apoplast (GO:0048046);;	K08235|5.27095e-142|pmum:103326039|probable xyloglucan endotransglucosylase/hydrolase protein 31; K08235 xyloglucan:xyloglucosyl transferase [EC:2.4.1.207] (A)	--	--	--	Xyloglucan endo-transglycosylase (XET) C-terminus	Probable xyloglucan endotransglucosylase/hydrolase protein 32 (Precursor) GN=XTH32 OS=Arabidopsis thaliana (Mouse-ear cress) PE=2 SV=1	G	Carbohydrate transport and metabolism	PREDICTED: probable xyloglucan endotransglucosylase/hydrolase protein 32 [Sesamum indicum]
F01_cb952_c20/f1p0/728	--	--	Biological Process: activation of MAPKK activity (GO:0000186);; Molecular Function: MAP kinase kinase kinase activity (GO:0004709);; Molecular Function: ATP binding (GO:0005524);; Cellular Component: integral component of membrane (GO:0016021);; Molecular Function: 2-alkenal reductase [NAD(P)] activity (GO:0032440);; Biological Process: oxidation-reduction process (GO:0055114);;	--	--	--	--	--	Leucine-rich repeat receptor-like protein kinase TDR (Precursor) GN=TDR OS=Arabidopsis thaliana (Mouse-ear cress) PE=1 SV=1	S	Function unknown	hypothetical protein MIMGU_mgv1a000952mg [Erythranthe guttata]
F01_cb11405_c6/f1p0/3188	--	--	--	--	--	--	--	Kelch motif;; F-box domain	F-box/kelch-repeat protein At1g23390 GN=At1g23390 OS=Arabidopsis thaliana (Mouse-ear cress) PE=2 SV=1	S	Function unknown	PREDICTED: F-box/kelch-repeat protein At1g23390-like [Sesamum indicum]
F02_cb7444_c12/f1p0/346	--	--	Molecular Function: kinase activity (GO:0016301);; Biological Process: cellular metabolic process (GO:0044237);; Molecular Function: metal ion binding (GO:0046872);;	K00873|4.96067e-09|pop:POPTR_0001s29650g|POPTRDRAFT_1069772; hypothetical protein; K00873 pyruvate kinase [EC:2.7.1.40] (A)	ko00010:Glycolysis / Gluconeogenesis;ko00230:Purine metabolism;ko00620:Pyruvate metabolism;ko01200:Carbon metabolism;ko01230:Biosynthesis of amino acids	--	--	--	--	G	Carbohydrate transport and metabolism	PREDICTED: pyruvate kinase isozyme A, chloroplastic-like [Sesamum indicum]
F01_cb1502_c10/f1p2/7407	[I]	Lipid transport and metabolism	Molecular Function: acetyl-CoA carboxylase activity (GO:0003989);; Molecular Function: biotin carboxylase activity (GO:0004075);; Molecular Function: ATP binding (GO:0005524);; Biological Process: fatty acid biosynthetic process (GO:0006633);; Molecular Function: metal ion binding (GO:0046872);;	K11262|0|vvi:100247288|acetyl-CoA carboxylase 1-like; K11262 acetyl-CoA carboxylase / biotin carboxylase [EC:6.4.1.2 6.3.4.14] (A)	ko00061:Fatty acid biosynthesis;ko00620:Pyruvate metabolism;ko00640:Propanoate metabolism;ko01212:Fatty acid metabolism	[I]	Lipid transport and metabolism	Acetyl-CoA carboxylase, central region;; Carboxyl transferase domain;; Carbamoyl-phosphate synthase L chain, ATP binding domain;; Carbamoyl-phosphate synthase L chain, N-terminal domain;; Biotin carboxylase C-terminal domain;; ATP-grasp domain;; Biotin-requiring enzyme;; ATP-grasp domain;; ATP-grasp domain;; D-ala D-ala ligase C-terminus	Biotin carboxylase GN=F15C21.1 OS=Arabidopsis thaliana (Mouse-ear cress) PE=1 SV=1	I	Lipid transport and metabolism	PREDICTED: acetyl-CoA carboxylase 1-like isoform X1 [Sesamum indicum]
F02_cb907_c13/f1p0/1476	--	--	--	--	--	--	--	--	Probable disease resistance protein At1g61180 GN=At1g61180 OS=Arabidopsis thaliana (Mouse-ear cress) PE=2 SV=2	S	Function unknown	PREDICTED: uncharacterized protein LOC102581026 isoform X2 [Solanum tuberosum]
F01_cb17392_c3/f2p0/626	--	--	--	--	--	--	--	--	--	--	--	hypothetical protein MIMGU_mgv1a017102mg [Erythranthe guttata]
F02_cb6695_c6/f1p0/2402	[C]	Energy production and conversion	Molecular Function: succinate dehydrogenase activity (GO:0000104);; Molecular Function: ATP binding (GO:0005524);; Cellular Component: cell wall (GO:0005618);; Cellular Component: mitochondrial respiratory chain complex II (GO:0005749);; Biological Process: tricarboxylic acid cycle (GO:0006099);; Biological Process: mitochondrial electron transport, succinate to ubiquinone (GO:0006121);; Molecula…	K00234|0|pxb:103941522|succinate dehydrogenase [ubiquinone] flavoprotein subunit 1, mitochondrial; K00234 succinate dehydrogenase (ubiquinone) flavoprotein subunit [EC:1.3.5.1] (A)	ko00020:Citrate cycle (TCA cycle);ko00190:Oxidative phosphorylation;ko01200:Carbon metabolism	[C]	Energy production and conversion	FAD binding domain;; FAD binding domain;; Fumarate reductase flavoprotein C-term	Succinate dehydrogenase [ubiquinone] flavoprotein subunit, mitochondrial (Precursor) GN=P0507H12.27 OS=Oryza sativa subsp. japonica (Rice) PE=2 SV=1	C	Energy production and conversion	PREDICTED: succinate dehydrogenase [ubiquinone] flavoprotein subunit, mitochondrial [Beta vulgaris subsp. vulgaris]
F01_cb243_c52/f1p0/3101	[O]	Posttranslational modification, protein turnover, chaperones	Molecular Function: ATP binding (GO:0005524);; Biological Process: proteolysis (GO:0006508);; Molecular Function: peptidase activity (GO:0008233);; Molecular Function: nucleoside-triphosphatase activity (GO:0017111);;	K03696|0|mdm:103437570|ATP-dependent Clp protease ATP-binding subunit clpA homolog CD4B, chloroplastic; K03696 ATP-dependent Clp protease ATP-binding subunit ClpC (A)	--	[O]	Posttranslational modification, protein turnover, chaperones	AAA domain (Cdc48 subfamily);; C-terminal, D2-small domain, of ClpB protein;; ATPase family associated with various cellular activities (AAA);; AAA domain (dynein-related subfamily);; UvrB/uvrC motif;; Sigma-54 interaction domain;; AAA ATPase domain;; Clp amino terminal domain;; AAA ATPase domain;; AAA domain (dynein-related subfamily)	ATP-dependent Clp protease ATP-binding subunit clpA homolog CD4A, chloroplastic (Precursor) GN=CD4A OS=Solanum lycopersicum (Tomato) PE=3 SV=1	O	Posttranslational modification, protein turnover, chaperones	PREDICTED: LOW QUALITY PROTEIN: ATP-dependent Clp protease ATP-binding subunit clpA homolog CD4B, chloroplastic [Sesamum indicum]
F01_cb3301_c0/f2p0/2993	--	--	Cellular Component: mitochondrion (GO:0005739);;	--	--	[R]	General function prediction only	PPR repeat;; Pentatricopeptide repeat domain;; PPR repeat;; PPR repeat family;; PPR repeat;; Pentatricopeptide repeat domain;; PPR repeat	Pentatricopeptide repeat-containing protein At3g53360, mitochondrial (Precursor) GN=PCMP-E86 OS=Arabidopsis thaliana (Mouse-ear cress) PE=2 SV=1	S	Function unknown	PREDICTED: pentatricopeptide repeat-containing protein At3g53360, mitochondrial [Nicotiana tomentosiformis]
F01_cb10374_c0/f1p0/2016	--	--	Molecular Function: zinc ion binding (GO:0008270);; Biological Process: phloem development (GO:0010088);; Biological Process: root development (GO:0048364);;	--	--	[TZ]	--	LIM domain;; Protein of unknown function (DUF3633);; Protein of unknown function (DUF3633)	Protein DA1-related 2 GN=DAR2 OS=Arabidopsis thaliana (Mouse-ear cress) PE=2 SV=1	S	Function unknown	PREDICTED: protein DA1-related 2 isoform X1 [Sesamum indicum]
F01_cb4594_c3/f2p1/2449	--	--	--	--	--	--	--	--	BTB/POZ domain-containing protein At3g50780 GN=At3g50780 OS=Arabidopsis thaliana (Mouse-ear cress) PE=2 SV=1	S	Function unknown	PREDICTED: BTB/POZ domain-containing protein At3g50780-like [Sesamum indicum]
F01_cb4502_c1/f1p0/2948	--	--	--	K05291|0|sot:102592961|GPI transamidase component PIG-S-like; K05291 phosphatidylinositol glycan, class S (A)	ko00563:Glycosylphosphatidylinositol(GPI)-anchor biosynthesis	[MO]	--	Phosphatidylinositol-glycan biosynthesis class S protein;; Phosphatidylinositol-glycan biosynthesis class S protein	Xyloglucan endotransglucosylase/hydrolase protein 3 (Precursor) GN=XTH3 OS=Arabidopsis thaliana (Mouse-ear cress) PE=2 SV=1	S	Function unknown	PREDICTED: GPI transamidase component PIG-S [Sesamum indicum]
F02_cb8704_c15/f1p0/2012	--	--	Molecular Function: aspartic-type endopeptidase activity (GO:0004190);; Cellular Component: endosome (GO:0005768);; Cellular Component: plasma membrane (GO:0005886);; Biological Process: proteolysis (GO:0006508);; Cellular Component: integral component of membrane (GO:0016021);;	--	--	[R]	General function prediction only	Signal peptide peptidase;; PA domain	Signal peptide peptidase-like 2 (Precursor) GN=SPPL2 OS=Arabidopsis thaliana (Mouse-ear cress) PE=2 SV=1	U	Intracellular trafficking, secretion, and vesicular transport	PREDICTED: signal peptide peptidase-like 2 [Sesamum indicum]
F01_cb8627_c9/f1p0/2084	[RTKL]	--	Molecular Function: protein serine/threonine kinase activity (GO:0004674);; Molecular Function: ATP binding (GO:0005524);; Biological Process: protein phosphorylation (GO:0006468);; Biological Process: signal transduction (GO:0007165);;	--	--	[T]	Signal transduction mechanisms	Protein kinase domain;; Protein tyrosine kinase;; NAF domain;; Kinase-like	CBL-interacting serine/threonine-protein kinase 11 GN=At2g30360 OS=Arabidopsis thaliana (Mouse-ear cress) PE=1 SV=1	T	Signal transduction mechanisms	PREDICTED: CBL-interacting serine/threonine-protein kinase 14-like [Sesamum indicum]
F01_cb14070_c0/f1p0/910	[R]	General function prediction only	Molecular Function: transporter activity (GO:0005215);; Cellular Component: membrane (GO:0016020);; Biological Process: transmembrane transport (GO:0055085);;	K06901|3.67678e-90|rcu:RCOM_1507420|purine permease, putative; K06901 putative MFS transporter, AGZA family, xanthine/uracil permease (A)	--	--	--	Permease family	Adenine/guanine permease AZG2 GN=AZG2 OS=Arabidopsis thaliana (Mouse-ear cress) PE=2 SV=1	S	Function unknown	hypothetical protein MIMGU_mgv1a004226mg [Erythranthe guttata]
F01_cb3068_c78/f1p0/1888	[R]	General function prediction only	Molecular Function: acid phosphatase activity (GO:0003993);; Molecular Function: protein serine/threonine phosphatase activity (GO:0004722);; Cellular Component: extracellular region (GO:0005576);; Cellular Component: vacuole (GO:0005773);; Cellular Component: cytosol (GO:0005829);; Biological Process: response to osmotic stress (GO:0006970);; Cellular Component: plant-type cell wall (GO:0009505)…	--	--	[G]	Carbohydrate transport and metabolism	Calcineurin-like phosphoesterase;; Iron/zinc purple acid phosphatase-like protein C	Peroxidase (Precursor) GN=PAP26 OS=Arabidopsis thaliana (Mouse-ear cress) PE=1 SV=1	S	Function unknown	hypothetical protein MIMGU_mgv1a005618mg [Erythranthe guttata]
F01_cb3471_c42/f1p0/3003	[A]	RNA processing and modification	Molecular Function: phosphoprotein phosphatase activity (GO:0004721);; Biological Process: mRNA processing (GO:0006397);; Biological Process: protein dephosphorylation (GO:0006470);;	K13917|0|vvi:100256199|mRNA capping enzyme-like; K13917 mRNA-capping enzyme [EC:2.7.7.50 3.6.1.-] (A)	ko03015:mRNA surveillance pathway	[A]	RNA processing and modification	Dual specificity phosphatase, catalytic domain;; Tyrosine phosphatase family;; Protein-tyrosine phosphatase;; mRNA capping enzyme, catalytic domain;; mRNA capping enzyme, C-terminal domain	--	A	RNA processing and modification	PREDICTED: mRNA-capping enzyme isoform X1 [Sesamum indicum]
F02_cb10100_c3/f1p0/1697	[R]	General function prediction only	Biological Process: metabolic process (GO:0008152);; Molecular Function: hydrolase activity (GO:0016787);;	K17623|2.55851e-43|cit:102608707|(DL)-glycerol-3-phosphatase 2-like; K17623 pseudouridine-5'-monophosphatase [EC:3.1.3.-] (A)	--	[R]	General function prediction only	Haloacid dehalogenase-like hydrolase;; HAD-hyrolase-like	(DL)-glycerol-3-phosphatase 1 (Precursor) GN=GPP1 OS=Arabidopsis thaliana (Mouse-ear cress) PE=1 SV=1	S	Function unknown	PREDICTED: (DL)-glycerol-3-phosphatase 2 isoform X2 [Nicotiana tomentosiformis]
F02_cb13895_c2/f1p0/1407	[R]	General function prediction only	Molecular Function: zinc ion binding (GO:0008270);; Biological Process: response to bacterium (GO:0009617);; Biological Process: plant-type hypersensitive response (GO:0009626);; Biological Process: lignin biosynthetic process (GO:0009809);; Molecular Function: aryl-alcohol dehydrogenase (NAD+) activity (GO:0018456);; Molecular Function: cinnamyl-alcohol dehydrogenase activity (GO:0045551);; Mole…	K00083|4.45384e-104|pmum:103335246|probable mannitol dehydrogenase; K00083 cinnamyl-alcohol dehydrogenase [EC:1.1.1.195] (A)	ko00940:Phenylpropanoid biosynthesis	[Q]	Secondary metabolites biosynthesis, transport and catabolism	Alcohol dehydrogenase GroES-like domain;; D-isomer specific 2-hydroxyacid dehydrogenase, NAD binding domain	Probable mannitol dehydrogenase GN=CAD OS=Fragaria ananassa (Strawberry) PE=2 SV=1	C	Energy production and conversion	PREDICTED: probable mannitol dehydrogenase [Sesamum indicum]
F01_cb11805_c1/f5p1/1684	--	--	--	K12183|1.07275e-175|vvi:100252147|protein ELC; K12183 ESCRT-I complex subunit TSG101 (A)	ko04144:Endocytosis	[OU]	--	UEV domain;; Vps23 core domain	Protein ELC GN=T2E22.28 OS=Arabidopsis thaliana (Mouse-ear cress) PE=1 SV=1	U	Intracellular trafficking, secretion, and vesicular transport	PREDICTED: protein ELC-like [Sesamum indicum]
F01_cb9193_c1/f1p0/2128	[E]	Amino acid transport and metabolism	Cellular Component: plasma membrane (GO:0005886);; Biological Process: oligopeptide transport (GO:0006857);; Biological Process: response to nitrate (GO:0010167);; Molecular Function: nitrate transmembrane transporter activity (GO:0015112);; Biological Process: nitrate transport (GO:0015706);; Biological Process: response to cadmium ion (GO:0046686);;	K14638|0|sot:102586669|nitrate transporter 1.5-like; K14638 solute carrier family 15 (peptide/histidine transporter), member 3/4 (A)	--	[E]	Amino acid transport and metabolism	POT family;; Major Facilitator Superfamily;; POT family	Protein NRT1/ PTR FAMILY 7.2 GN=F17L22.140 OS=Arabidopsis thaliana (Mouse-ear cress) PE=2 SV=2	E	Amino acid transport and metabolism	PREDICTED: nitrate transporter 1.5-like [Solanum tuberosum]
F01_cb13051_c2/f1p0/832	--	--	--	--	--	--	--	--	--	S	Function unknown	hypothetical protein MIMGU_mgv1a012606mg [Erythranthe guttata]
F01_cb362_c11/f1p0/3396	[R]	General function prediction only	--	K12822|3.18815e-101|sot:102598264|RNA-binding protein 25-like; K12822 RNA-binding protein 25 (A)	ko03040:Spliceosome	[A]	RNA processing and modification	PWI domain;; RNA recognition motif. (a.k.a. RRM, RBD, or RNP domain);; RNA recognition motif (a.k.a. RRM, RBD, or RNP domain)	--	S	Function unknown	PREDICTED: LOW QUALITY PROTEIN: RNA-binding protein 25 [Sesamum indicum]
F02_cb11056_c4/f1p0/1688	[R]	General function prediction only	--	--	--	[T]	Signal transduction mechanisms	--	--	S	Function unknown	PREDICTED: uncharacterized protein LOC105178350 [Sesamum indicum]
F02_cb11869_c1/f1p0/1713	--	--	Molecular Function: transferase activity, transferring glycosyl groups (GO:0016757);;	--	--	[GC]	--	UDP-glucoronosyl and UDP-glucosyl transferase	UDP-glycosyltransferase 83A1 GN=UGT83A1 OS=Arabidopsis thaliana (Mouse-ear cress) PE=2 SV=1	S	Function unknown	hypothetical protein MIMGU_mgv1a005998mg [Erythranthe guttata]
F02_cb15563_c1/f1p0/474	[R]	General function prediction only	Molecular Function: O-methyltransferase activity (GO:0008171);; Biological Process: methylation (GO:0032259);;	K13272|2.1718e-43|vvi:100250579|flavonoid 3',5'-methyltransferase-like; K13272 flavonoid O-methyltransferase [EC:2.1.1.267] (A)	ko00944:Flavone and flavonol biosynthesis	[Q]	Secondary metabolites biosynthesis, transport and catabolism	O-methyltransferase	Flavonoid 3&apos;,5&apos;-methyltransferase GN=FAOMT OS=Vitis vinifera (Grape) PE=1 SV=1	S	Function unknown	PREDICTED: flavonoid 3&apos;,5&apos;-methyltransferase-like [Sesamum indicum]
F01_cb10070_c30/f1p0/2152	--	--	Molecular Function: transporter activity (GO:0005215);; Cellular Component: membrane (GO:0016020);; Biological Process: transmembrane transport (GO:0055085);;	K14611|0|sly:101253471|nucleobase-ascorbate transporter 6; K14611 solute carrier family 23 (nucleobase transporter), member 1/2 (A)	--	[F]	Nucleotide transport and metabolism	Permease family	Nucleobase-ascorbate transporter 6 GN=NAT6 OS=Arabidopsis thaliana (Mouse-ear cress) PE=2 SV=2	F	Nucleotide transport and metabolism	PREDICTED: nucleobase-ascorbate transporter 6 [Sesamum indicum]
F01_cb16438_c37998/f1p0/1711	[MG]	--	Biological Process: carbohydrate metabolic process (GO:0005975);; Biological Process: cellular metabolic process (GO:0044237);; Molecular Function: UDP-glucuronate 5'-epimerase activity (GO:0050379);; Molecular Function: coenzyme binding (GO:0050662);;	K08679|0|cit:102630639|UDP-glucuronate 4-epimerase 1-like; K08679 UDP-glucuronate 4-epimerase [EC:5.1.3.6] (A)	ko00500:Starch and sucrose metabolism;ko00520:Amino sugar and nucleotide sugar metabolism	[M]	Cell wall/membrane/envelope biogenesis	NAD dependent epimerase/dehydratase family;; RmlD substrate binding domain;; 3-beta hydroxysteroid dehydrogenase/isomerase family;; Male sterility protein;; Polysaccharide biosynthesis protein	UDP-glucuronate 4-epimerase 1 GN=F17I23.220 OS=Arabidopsis thaliana (Mouse-ear cress) PE=1 SV=1	M	Cell wall/membrane/envelope biogenesis	PREDICTED: UDP-glucuronate 4-epimerase 1 [Sesamum indicum]
F02_cb2300_c9/f1p0/2079	--	--	Cellular Component: endoplasmic reticulum (GO:0005783);; Biological Process: cellular amino acid metabolic process (GO:0006520);; Biological Process: fatty acid beta-oxidation (GO:0006635);; Biological Process: ER to Golgi vesicle-mediated transport (GO:0006888);; Molecular Function: sphinganine-1-phosphate aldolase activity (GO:0008117);; Biological Process: toxin catabolic process (GO:0009407);…	K01634|0|rcu:RCOM_1079290|sphingosine phosphate lyase, putative (EC:4.1.2.27); K01634 sphinganine-1-phosphate aldolase [EC:4.1.2.27] (A)	ko00600:Sphingolipid metabolism	[E]	Amino acid transport and metabolism	Pyridoxal-dependent decarboxylase conserved domain;; Aminotransferase class-V	Sphingosine-1-phosphate lyase GN=DPL1 OS=Arabidopsis thaliana (Mouse-ear cress) PE=1 SV=1	E	Amino acid transport and metabolism	PREDICTED: sphingosine-1-phosphate lyase [Sesamum indicum]
F02_cb8958_c1/f1p0/2107	--	--	Biological Process: telomere maintenance (GO:0000723);; Molecular Function: damaged DNA binding (GO:0003684);; Molecular Function: double-stranded DNA binding (GO:0003690);; Molecular Function: ATP-dependent DNA helicase activity (GO:0004003);; Cellular Component: DNA-dependent protein kinase-DNA ligase 4 complex (GO:0005958);; Biological Process: double-strand break repair via nonhomologous end …	K10884|0|sly:101260670|ATP-dependent DNA helicase 2 subunit KU70; K10884 ATP-dependent DNA helicase 2 subunit 1 (A)	ko03450:Non-homologous end-joining	[L]	Replication, recombination and repair	Ku70/Ku80 N-terminal alpha/beta domain;; Ku70/Ku80 beta-barrel domain;; Ku70/Ku80 C-terminal arm;; SAP domain	ATP-dependent DNA helicase 2 subunit KU70 GN=KU70 OS=Arabidopsis thaliana (Mouse-ear cress) PE=1 SV=1	L	Replication, recombination and repair	PREDICTED: ATP-dependent DNA helicase 2 subunit KU70 isoform X1 [Sesamum indicum]
F02_cb4092_c5/f1p0/2810	--	--	--	--	--	[K]	Transcription	Associated with HOX;; Homeobox KN domain;; Homeobox domain	BEL1-like homeodomain protein 2 OS=Arabidopsis thaliana (Mouse-ear cress) PE=1 SV=3	K	Transcription	PREDICTED: BEL1-like homeodomain protein 4 [Sesamum indicum]
F02_cb9990_c3/f1p0/1255	--	--	--	K01074|4.65937e-49|rcu:RCOM_1608620|Palmitoyl-protein thioesterase 1 precursor, putative (EC:3.1.2.22); K01074 palmitoyl-protein thioesterase [EC:3.1.2.22] (A)	ko00062:Fatty acid elongation;ko01212:Fatty acid metabolism	[IO]	--	--	--	S	Function unknown	PREDICTED: palmitoyl-protein thioesterase 1 [Sesamum indicum]
F02_cb8406_c6/f1p1/1842	[IQ]	--	--	K18660|1.65413e-152|sly:101245036|malonate--CoA ligase; K18660 malonyl-CoA/methylmalonyl-CoA synthetase [EC:6.2.1.-] (A)	ko00280:Valine, leucine and isoleucine degradation	[I]	Lipid transport and metabolism	AMP-binding enzyme;; AMP-binding enzyme;; AMP-binding enzyme C-terminal domain	Malonate--CoA ligase GN=AAE13 OS=Arabidopsis thaliana (Mouse-ear cress) PE=1 SV=1	IQ	--	Malonate--CoA ligase [Morus notabilis]
F02_cb11041_c115078/f1p21/3328	--	--	--	--	--	--	--	Large coat protein;; Small coat protein	--	--	--	--
F01_cb16438_c3107/f1p0/2414	--	--	--	--	--	--	--	--	Probable pectinesterase 66 (Precursor) GN=T8I13.12 OS=Arabidopsis thaliana (Mouse-ear cress) PE=2 SV=2	S	Function unknown	hypothetical protein L484_021594 [Morus notabilis]
F01_cb4615_c10/f8p0/2560	[KL]	--	Biological Process: RNA splicing, via endonucleolytic cleavage and ligation (GO:0000394);; Biological Process: double-strand break repair via homologous recombination (GO:0000724);; Molecular Function: DNA binding (GO:0003677);; Molecular Function: ATP-dependent DNA helicase activity (GO:0004003);; Molecular Function: ATP binding (GO:0005524);; Cellular Component: nucleus (GO:0005634);; Biologica…	K10844|0|vvi:100240869|DNA repair helicase UVH6; K10844 DNA excision repair protein ERCC-2 [EC:3.6.4.12] (A)	ko03022:Basal transcription factors;ko03420:Nucleotide excision repair	[KL]	--	Protein of unknown function (DUF1227);; Helicase C-terminal domain;; DEAD_2;; Type III restriction enzyme, res subunit	DNA repair helicase UVH6 GN=F15K9.20 OS=Arabidopsis thaliana (Mouse-ear cress) PE=1 SV=1	L	Replication, recombination and repair	PREDICTED: DNA repair helicase UVH6 isoform X2 [Sesamum indicum]
F01_cb12813_c5/f1p0/1612	[GC]	--	--	--	--	[GC]	--	--	UDP-glycosyltransferase 91A1 GN=UGT91A1 OS=Arabidopsis thaliana (Mouse-ear cress) PE=2 SV=1	S	Function unknown	PREDICTED: putative UDP-rhamnose:rhamnosyltransferase 1 [Sesamum indicum]
F02_cb10496_c1/f1p0/1932	--	--	Molecular Function: oleoyl-[acyl-carrier-protein] hydrolase activity (GO:0004320);; Biological Process: fatty acid biosynthetic process (GO:0006633);; Cellular Component: chloroplast (GO:0009507);; Molecular Function: myristoyl-[acyl-carrier-protein] hydrolase activity (GO:0016295);; Molecular Function: palmitoyl-[acyl-carrier-protein] hydrolase activity (GO:0016296);;	K10782|2.81486e-155|tcc:TCM_002853|FatA acyl-ACP thioesterase; K10782 fatty acyl-ACP thioesterase A [EC:3.1.2.14] (A)	ko00061:Fatty acid biosynthesis	--	--	Acyl-ACP thioesterase;; Acyl-ACP thioesterase	Oleoyl-acyl carrier protein thioesterase, chloroplastic (Precursor; Fragment) GN=FATA OS=Coriandrum sativum (Coriander) PE=2 SV=1	I	Lipid transport and metabolism	hypothetical protein MIMGU_mgv1a008340mg [Erythranthe guttata]
F01_cb4172_c23/f2p0/2441	[O]	Posttranslational modification, protein turnover, chaperones	Molecular Function: ATP binding (GO:0005524);; Molecular Function: nucleoside-triphosphatase activity (GO:0017111);; Biological Process: cell division (GO:0051301);;	K13525|0|sly:101266129|cell division cycle protein 48 homolog; K13525 transitional endoplasmic reticulum ATPase (A)	ko04141:Protein processing in endoplasmic reticulum	[O]	Posttranslational modification, protein turnover, chaperones	ATPase family associated with various cellular activities (AAA);; Holliday junction DNA helicase ruvB N-terminus;; RNA helicase;; ATPase family associated with various cellular activities (AAA);; Cell division protein 48 (CDC48), domain 2;; Holliday junction DNA helicase ruvB N-terminus;; Cell division protein 48 (CDC48), N-terminal domain	Cell division cycle protein 48 homolog GN=CAFP OS=Capsicum annuum (Bell pepper) PE=2 SV=1	O	Posttranslational modification, protein turnover, chaperones	hypothetical protein MIMGU_mgv1a001503mg [Erythranthe guttata]
F02_cb1461_c14/f1p1/3392	[Z]	Cytoskeleton	Molecular Function: microtubule motor activity (GO:0003777);; Molecular Function: ATP binding (GO:0005524);; Cellular Component: kinesin complex (GO:0005871);; Cellular Component: microtubule (GO:0005874);; Biological Process: microtubule-based movement (GO:0007018);; Molecular Function: microtubule binding (GO:0008017);;	K11498|0|tcc:TCM_024960|P-loop containing nucleoside triphosphate hydrolases superfamily protein isoform 1; K11498 centromeric protein E (A)	--	[Z]	Cytoskeleton	Kinesin motor domain	Kinesin-like protein NACK1 GN=NACK1 OS=Nicotiana tabacum (Common tobacco) PE=1 SV=1	Z	Cytoskeleton	PREDICTED: osmotic avoidance abnormal protein 3-like [Sesamum indicum]
F01_cb16438_c21069/f1p1/1660	--	--	Biological Process: proteolysis (GO:0006508);; Molecular Function: cysteine-type peptidase activity (GO:0008234);; Cellular Component: nuclear part (GO:0044428);; Cellular Component: chloroplast part (GO:0044434);;	--	--	[O]	Posttranslational modification, protein turnover, chaperones	Papain family cysteine protease;; Cathepsin propeptide inhibitor domain (I29);; Granulin;; Peptidase C1-like family	Oryzain alpha chain (Precursor) OS=Oryza sativa subsp. japonica (Rice) PE=1 SV=2	O	Posttranslational modification, protein turnover, chaperones	PREDICTED: low-temperature-induced cysteine proteinase-like [Sesamum indicum]
F01_cb16438_c1075/f1p0/1541	[J]	Translation, ribosomal structure and biogenesis	Molecular Function: translation elongation factor activity (GO:0003746);; Molecular Function: GTPase activity (GO:0003924);; Molecular Function: GTP binding (GO:0005525);; Cellular Component: nucleolus (GO:0005730);; Cellular Component: mitochondrion (GO:0005739);; Cellular Component: vacuole (GO:0005773);; Cellular Component: plasma membrane (GO:0005886);; Biological Process: GTP catabolic proce…	K03231|0|osa:4331813|Os03g0178000; K03231 elongation factor 1-alpha (A)	ko03013:RNA transport	[J]	Translation, ribosomal structure and biogenesis	Elongation factor Tu GTP binding domain;; Elongation factor Tu domain 2;; Elongation factor Tu C-terminal domain;; 50S ribosome-binding GTPase	Elongation factor 1-alpha GN=REFA4 OS=Oryza sativa subsp. japonica (Rice) PE=2 SV=2	J	Translation, ribosomal structure and biogenesis	translation elongation factor-1 alpha [Stylosanthes guianensis]
F02_cb8877_c5/f1p0/1076	[TK]	--	Molecular Function: calcium ion binding (GO:0005509);; Molecular Function: GTP diphosphokinase activity (GO:0008728);; Cellular Component: chloroplast (GO:0009507);; Biological Process: guanosine tetraphosphate metabolic process (GO:0015969);;	--	--	[T]	Signal transduction mechanisms	Region found in RelA / SpoT proteins;; EF hand;; EF-hand domain pair;; EF hand;; EF-hand domain;; EF-hand domain pair	Probable GTP diphosphokinase CRSH, chloroplastic (Precursor) GN=CRSH OS=Arabidopsis thaliana (Mouse-ear cress) PE=2 SV=1	KT	--	PREDICTED: probable GTP diphosphokinase CRSH, chloroplastic [Sesamum indicum]
F01_cb5040_c5/f1p0/2272	[K]	Transcription	Cellular Component: nucleus (GO:0005634);; Biological Process: DNA-templated transcription, initiation (GO:0006352);; Molecular Function: zinc ion binding (GO:0008270);; Molecular Function: TBP-class protein binding (GO:0017025);; Biological Process: positive regulation of transcription, DNA-templated (GO:0045893);;	K15196|1.49131e-80|sbi:SORBI_09g027090|SORBIDRAFT_09g027090, Sb09g027090; hypothetical protein; K15196 transcription factor IIIB 90 kDa subunit (A)	--	[K]	Transcription	Brf1-like TBP-binding domain;; Transcription factor TFIIB repeat;; Transcription factor TFIIB repeat	--	K	Transcription	PREDICTED: transcription factor IIIB 90 kDa subunit isoform X2 [Sesamum indicum]
F02_cb11041_c89322/f1p0/2398	--	--	--	--	--	--	--	--	Zinc finger CCCH domain-containing protein 40 GN=At3g21810 OS=Arabidopsis thaliana (Mouse-ear cress) PE=1 SV=1	S	Function unknown	PREDICTED: zinc finger CCCH domain-containing protein 13 isoform X2 [Sesamum indicum]
F01_cb7870_c4/f1p0/2651	[O]	Posttranslational modification, protein turnover, chaperones	Molecular Function: serine-type endopeptidase activity (GO:0004252);; Biological Process: proteolysis (GO:0006508);; Molecular Function: 2-alkenal reductase [NAD(P)] activity (GO:0032440);; Biological Process: oxidation-reduction process (GO:0055114);;	--	--	[O]	Posttranslational modification, protein turnover, chaperones	Trypsin-like peptidase domain;; Trypsin;; PDZ domain	Protease Do-like 2, chloroplastic (Precursor) GN=DEGP2 OS=Arabidopsis thaliana (Mouse-ear cress) PE=1 SV=2	O	Posttranslational modification, protein turnover, chaperones	PREDICTED: protease Do-like 2, chloroplastic [Sesamum indicum]
F02_cb1188_c1/f1p1/3281	[V]	Defense mechanisms	Molecular Function: ATP binding (GO:0005524);; Biological Process: ATP catabolic process (GO:0006200);; Molecular Function: xenobiotic-transporting ATPase activity (GO:0008559);;	--	--	[Q]	Secondary metabolites biosynthesis, transport and catabolism	ABC transporter	ABC transporter G family member 24 GN=F12M16.28 OS=Arabidopsis thaliana (Mouse-ear cress) PE=2 SV=2	V	Defense mechanisms	PREDICTED: ABC transporter G family member 24-like [Sesamum indicum]
F01_cb9576_c8/f1p0/3341	[KL]	--	Cellular Component: core TFIIH complex (GO:0000439);; Molecular Function: ATP-dependent DNA helicase activity (GO:0004003);; Biological Process: nucleotide-excision repair (GO:0006289);;	K03144|0|sly:101244148|general transcription factor IIH subunit 4; K03144 transcription initiation factor TFIIH subunit 4 (A)	ko03022:Basal transcription factors;ko03420:Nucleotide excision repair	[T]	Signal transduction mechanisms	Transcription factor Tfb2;; Protein kinase domain;; Protein tyrosine kinase	Serine/threonine-protein kinase CTR1 GN=CTR1 OS=Arabidopsis thaliana (Mouse-ear cress) PE=1 SV=1	K	Transcription	hypothetical protein MIMGU_mgv1a006192mg [Erythranthe guttata]
F02_cb7201_c5/f1p0/698	--	--	Molecular Function: protein serine/threonine kinase activity (GO:0004674);; Molecular Function: ATP binding (GO:0005524);; Biological Process: protein phosphorylation (GO:0006468);;	--	--	[T]	Signal transduction mechanisms	--	Probable receptor-like protein kinase At1g80640 (Precursor) GN=At1g80640 OS=Arabidopsis thaliana (Mouse-ear cress) PE=2 SV=1	T	Signal transduction mechanisms	hypothetical protein PRUPE_ppa008520mg [Prunus persica]
F02_cb8727_c16/f1p0/2246	[RTKL]	--	Molecular Function: calmodulin-dependent protein kinase activity (GO:0004683);; Molecular Function: calcium ion binding (GO:0005509);; Molecular Function: protein binding (GO:0005515);; Molecular Function: ATP binding (GO:0005524);; Cellular Component: nucleus (GO:0005634);; Cellular Component: plasma membrane (GO:0005886);; Biological Process: protein phosphorylation (GO:0006468);; Biological Pr…	K13412|0|cit:102611873|calcium-dependent protein kinase 10-like; K13412 calcium-dependent protein kinase [EC:2.7.11.1] (A)	ko04626:Plant-pathogen interaction	[T]	Signal transduction mechanisms	Protein kinase domain;; Protein tyrosine kinase;; EF hand;; EF-hand domain pair;; EF-hand domain;; EF-hand domain pair;; EF hand;; Cytoskeletal-regulatory complex EF hand;; Protein kinase domain;; Protein tyrosine kinase	Calcium-dependent protein kinase 30 GN=F25A4.29 OS=Arabidopsis thaliana (Mouse-ear cress) PE=1 SV=1	T	Signal transduction mechanisms	PREDICTED: calcium-dependent protein kinase 10 [Sesamum indicum]
F02_cb12105_c2/f1p0/1563	[R]	General function prediction only	--	--	--	[A]	RNA processing and modification	RNA recognition motif. (a.k.a. RRM, RBD, or RNP domain);; RNA recognition motif (a.k.a. RRM, RBD, or RNP domain);; RNA recognition motif. (a.k.a. RRM, RBD, or RNP domain);; WW domain	Flowering time control protein FCA OS=Arabidopsis thaliana (Mouse-ear cress) PE=1 SV=2	S	Function unknown	PREDICTED: flowering time control protein FCA [Sesamum indicum]
F02_cb92_c1/f1p0/4703	--	--	--	--	--	[R]	General function prediction only	DnaJ domain;; Bacterial PH domain	Auxilin-like protein 1 GN=AUL1 OS=Arabidopsis thaliana (Mouse-ear cress) PE=2 SV=2	S	Function unknown	PREDICTED: auxilin-like protein 1 [Sesamum indicum]
F02_cb10708_c2/f1p0/2014	--	--	Biological Process: regulation of transcription, DNA-templated (GO:0006355);;	--	--	--	--	GRAS domain family	Nodulation-signaling pathway 1 protein GN=NSP1 OS=Medicago truncatula (Barrel medic) PE=1 SV=1	S	Function unknown	PREDICTED: nodulation-signaling pathway 1 protein [Sesamum indicum]
F01_cb1615_c15/f1p1/3989	--	--	Molecular Function: nucleic acid binding (GO:0003676);;	--	--	--	--	--	--	S	Function unknown	PREDICTED: uncharacterized protein LOC105164201 isoform X1 [Sesamum indicum]
F02_cb977_c32/f1p0/4166	--	--	--	--	--	--	--	--	--	S	Function unknown	PREDICTED: uncharacterized protein LOC105162855 [Sesamum indicum]
F02_cb14353_c0/f3p0/923	[R]	General function prediction only	Molecular Function: GTP binding (GO:0005525);; Cellular Component: Golgi apparatus (GO:0005794);; Biological Process: N-terminal protein myristoylation (GO:0006499);; Biological Process: small GTPase mediated signal transduction (GO:0007264);;	K07977|7.24397e-121|cit:102609009|ADP-ribosylation factor-like; K07977 Arf/Sar family, other (A)	--	[U]	Intracellular trafficking, secretion, and vesicular transport	ADP-ribosylation factor family;; Gtr1/RagA G protein conserved region;; Ras family;; Signal recognition particle receptor beta subunit;; Miro-like protein	ADP-ribosylation factor 1 OS=Solanum tuberosum (Potato) PE=2 SV=2	S	Function unknown	PREDICTED: ADP-ribosylation factor 1-like 2 [Tarenaya hassleriana]
F02_cb13883_c5/f1p0/1167	[O]	Posttranslational modification, protein turnover, chaperones	Cellular Component: Golgi apparatus (GO:0005794);; Molecular Function: arsenate reductase (glutaredoxin) activity (GO:0008794);; Molecular Function: electron carrier activity (GO:0009055);; Molecular Function: protein disulfide oxidoreductase activity (GO:0015035);; Biological Process: methylglyoxal catabolic process to D-lactate (GO:0019243);; Biological Process: cell redox homeostasis (GO:00454…	K03676|1.4148e-31|gmx:100500348|uncharacterized LOC100500348; K03676 glutaredoxin 3 (A)	--	[O]	Posttranslational modification, protein turnover, chaperones	--	Glutaredoxin-C3 GN=GRXC3 OS=Arabidopsis thaliana (Mouse-ear cress) PE=2 SV=1	O	Posttranslational modification, protein turnover, chaperones	hypothetical protein MIMGU_mgv1a014320mg [Erythranthe guttata]
F01_cb5927_c13/f1p1/1947	--	--	--	--	--	--	--	--	--	S	Function unknown	PREDICTED: uncharacterized protein LOC105174097 [Sesamum indicum]
F01_cb16438_c3103/f1p0/3253	[RTKL]	--	--	K13420|0|tcc:TCM_033413|Leucine-rich repeat protein kinase family protein, putative; K13420 LRR receptor-like serine/threonine-protein kinase FLS2 [EC:2.7.11.1] (A)	ko04626:Plant-pathogen interaction	--	--	Protein kinase domain;; Protein tyrosine kinase;; Leucine Rich repeats (2 copies);; Leucine Rich Repeat;; Leucine rich repeat;; Leucine rich repeat N-terminal domain;; Leucine Rich repeats (2 copies);; Leucine rich repeat;; Leucine Rich Repeat;; Leucine rich repeat;; Leucine rich repeat;; Leucine Rich repeats (2 copies);; Leucine Rich Repeat;; Leucine Rich repeat;; Leucine rich repeat;; Leucine R…	Probable LRR receptor-like serine/threonine-protein kinase At3g47570 (Precursor) GN=At3g47570 OS=Arabidopsis thaliana (Mouse-ear cress) PE=2 SV=1	S	Function unknown	hypothetical protein MIMGU_mgv1a019561mg, partial [Erythranthe guttata]
F02_cb5838_c3/f1p1/2598	--	--	--	--	--	--	--	bHLH-MYC and R2R3-MYB transcription factors N-terminal;; Helix-loop-helix DNA-binding domain;; bHLH-MYC and R2R3-MYB transcription factors N-terminal	Transcription factor bHLH13 GN=F6F3.7 OS=Arabidopsis thaliana (Mouse-ear cress) PE=2 SV=1	K	Transcription	PREDICTED: transcription factor bHLH13-like isoform X2 [Sesamum indicum]
F01_cb17799_c1/f1p0/692	--	--	--	--	--	--	--	--	--	S	Function unknown	PREDICTED: uncharacterized protein LOC105138874 [Populus euphratica]
F01_cb6583_c0/f1p0/2656	--	--	Biological Process: primary metabolic process (GO:0044238);; Biological Process: cellular macromolecule metabolic process (GO:0044260);; Biological Process: single-organism cellular process (GO:0044763);; Biological Process: regulation of cellular process (GO:0050794);; Biological Process: regulation of macromolecule metabolic process (GO:0060255);;	--	--	--	--	--	--	S	Function unknown	PREDICTED: uncharacterized protein LOC105166158 [Sesamum indicum]
F02_cb8860_c0/f2p0/2168	[R]	General function prediction only	Molecular Function: hydrolase activity (GO:0016787);;	--	--	[R]	General function prediction only	Alpha/beta hydrolase family;; Alpha/beta hydrolase family;; alpha/beta hydrolase fold	Pheophytinase, chloroplastic (Precursor) GN=MAC12.25 OS=Arabidopsis thaliana (Mouse-ear cress) PE=1 SV=1	S	Function unknown	PREDICTED: pheophytinase, chloroplastic [Sesamum indicum]
F02_cb12512_c1/f1p0/1382	--	--	--	--	--	[P]	Inorganic ion transport and metabolism	ChaC-like protein	--	P	Inorganic ion transport and metabolism	hypothetical protein MIMGU_mgv1a013369mg [Erythranthe guttata]
F01_cb18597_c0/f6p0/817	--	--	Molecular Function: actin binding (GO:0003779);; Cellular Component: cell wall (GO:0005618);; Cellular Component: nucleolus (GO:0005730);; Cellular Component: spindle (GO:0005819);; Cellular Component: plasma membrane (GO:0005886);; Biological Process: actin polymerization or depolymerization (GO:0008154);; Cellular Component: chloroplast (GO:0009507);; Cellular Component: phragmoplast (GO:000952…	K05759|2.77545e-75|mus:103988411|profilin-1; K05759 profilin (A)	--	[Z]	Cytoskeleton	Profilin	Profilin-A GN=OSJNBa0065C16.14 OS=Oryza sativa subsp. japonica (Rice) PE=2 SV=1	O	Posttranslational modification, protein turnover, chaperones	hypothetical protein MIMGU_mgv1a016199mg [Erythranthe guttata]
F02_cb1957_c1/f1p0/3277	[RTKL]	--	Molecular Function: protein kinase activity (GO:0004672);;	--	--	--	--	Protein tyrosine kinase;; Protein kinase domain;; Leucine Rich Repeat;; Leucine Rich repeats (2 copies);; Leucine rich repeat;; Leucine rich repeat N-terminal domain;; Leucine rich repeat	Probable LRR receptor-like serine/threonine-protein kinase At4g20940 GN=At4g20940 OS=Arabidopsis thaliana (Mouse-ear cress) PE=1 SV=1	T	Signal transduction mechanisms	PREDICTED: probable inactive receptor kinase At5g10020 [Sesamum indicum]
F01_cb11071_c6/f2p0/1780	[E]	Amino acid transport and metabolism	Biological Process: RNA splicing, via endonucleolytic cleavage and ligation (GO:0000394);; Molecular Function: aminoacylase activity (GO:0004046);; Cellular Component: vacuole (GO:0005773);; Cellular Component: endoplasmic reticulum (GO:0005783);; Cellular Component: Golgi apparatus (GO:0005794);; Biological Process: proteolysis (GO:0006508);; Molecular Function: metallopeptidase activity (GO:000…	K14677|0|sly:543751|ctd3; aminoacylase-1; K14677 aminoacylase [EC:3.5.1.14] (A)	ko00330:Arginine and proline metabolism;ko01210:2-Oxocarboxylic acid metabolism;ko01230:Biosynthesis of amino acids	[E]	Amino acid transport and metabolism	Peptidase family M20/M25/M40;; Peptidase dimerisation domain	--	E	Amino acid transport and metabolism	PREDICTED: aminoacylase-1 isoform X2 [Sesamum indicum]
F01_cb12634_c4/f1p0/1458	[S]	Function unknown	--	--	--	--	--	SNARE associated Golgi protein	--	S	Function unknown	PREDICTED: transmembrane protein 64 [Sesamum indicum]
F02_cb11041_c116193/f1p1/2489	[C]	Energy production and conversion	Molecular Function: iron ion binding (GO:0005506);; Biological Process: transport (GO:0006810);; Molecular Function: NADH dehydrogenase (ubiquinone) activity (GO:0008137);; Cellular Component: chloroplast thylakoid membrane (GO:0009535);; Biological Process: photosynthesis, light reaction (GO:0019684);; Molecular Function: quinone binding (GO:0048038);; Molecular Function: 4 iron, 4 sulfur cluste…	K05582|1.786e-79|pop:Poptr_cp026|ndhK; NADH dehydrogenase subunit K (EC:1.6.5.3); K05582 NAD(P)H-quinone oxidoreductase subunit K [EC:1.6.5.3] (A)	ko00190:Oxidative phosphorylation	[C]	Energy production and conversion	NADH ubiquinone oxidoreductase, 20 Kd subunit	NAD(P)H-quinone oxidoreductase subunit K, chloroplastic {ECO:0000255|HAMAP-Rule:MF_01356} OS=Populus alba (White poplar) PE=3 SV=1	C	Energy production and conversion	photosystem II G protein [Populus trichocarpa]
F02_cb222_c10/f1p0/3171	--	--	--	--	--	--	--	--	--	S	Function unknown	PREDICTED: uncharacterized protein LOC105163168 [Sesamum indicum]
F02_cb8263_c7/f1p0/1868	[Q]	Secondary metabolites biosynthesis, transport and catabolism	Molecular Function: monooxygenase activity (GO:0004497);; Molecular Function: iron ion binding (GO:0005506);; Molecular Function: electron carrier activity (GO:0009055);; Cellular Component: integral component of membrane (GO:0016021);; Biological Process: brassinosteroid biosynthetic process (GO:0016132);; Molecular Function: oxidoreductase activity, acting on paired donors, with incorporation o…	K12640|0|sot:102603315|cytochrome P450 85A1-like; K12640 brassinosteroid-6-oxidase 2 [EC:1.14.-.-] (A)	ko00905:Brassinosteroid biosynthesis	[QI]	--	Cytochrome P450	Cytochrome P450 85A1 GN=CYP85A1 OS=Solanum lycopersicum (Tomato) PE=2 SV=1	Q	Secondary metabolites biosynthesis, transport and catabolism	PREDICTED: cytochrome P450 85A1 [Sesamum indicum]
F02_cb3166_c5/f1p0/1161	[R]	General function prediction only	Molecular Function: iron ion binding (GO:0005506);; Molecular Function: oxidoreductase activity, acting on paired donors, with incorporation or reduction of molecular oxygen, 2-oxoglutarate as one donor, and incorporation of one atom each of oxygen into both donors (GO:0016706);; Biological Process: oxidation-reduction process (GO:0055114);;	K06892|8.29597e-179|vvi:100254388|probable 2-oxoglutarate-dependent dioxygenase At3g49630; K06892 feruloyl-CoA ortho-hydroxylase [EC:1.14.11.-] (A)	--	[QR]	--	non-haem dioxygenase in morphine synthesis N-terminal;; 2OG-Fe(II) oxygenase superfamily	Probable 2-oxoglutarate-dependent dioxygenase At3g49630 GN=At3g50210 OS=Arabidopsis thaliana (Mouse-ear cress) PE=2 SV=1	S	Function unknown	PREDICTED: probable 2-oxoglutarate-dependent dioxygenase At3g49630 isoform X1 [Sesamum indicum]
F01_cb20123_c1/f1p0/1161	[O]	Posttranslational modification, protein turnover, chaperones	Molecular Function: ubiquitin-protein transferase activity (GO:0004842);; Biological Process: postreplication repair (GO:0006301);; Biological Process: fatty acid beta-oxidation (GO:0006635);; Biological Process: toxin catabolic process (GO:0009407);; Biological Process: cellular response to phosphate starvation (GO:0016036);; Biological Process: protein ubiquitination (GO:0016567);; Biological P…	K10578|4.44363e-164|rcu:RCOM_1000310|non-canonical ubiquitin conjugating enzyme, putative (EC:6.3.2.19); K10578 ubiquitin-conjugating enzyme E2 J1 [EC:6.3.2.19] (A)	ko04120:Ubiquitin mediated proteolysis;ko04141:Protein processing in endoplasmic reticulum	[O]	Posttranslational modification, protein turnover, chaperones	Ubiquitin-conjugating enzyme	Ubiquitin-conjugating enzyme E2 32 GN=UBC32 OS=Arabidopsis thaliana (Mouse-ear cress) PE=2 SV=1	O	Posttranslational modification, protein turnover, chaperones	Ubiquitin-conjugating enzyme E2 32 [Morus notabilis]
F02_cb8171_c2/f1p0/2215	--	--	Molecular Function: hydrolase activity (GO:0016787);;	K13210|8.74336e-86|pper:PRUPE_ppa002757mg|hypothetical protein; K13210 far upstream element-binding protein (A)	--	[A]	RNA processing and modification	KH domain;; KH domain	--	S	Function unknown	PREDICTED: far upstream element-binding protein 1-like isoform X1 [Beta vulgaris subsp. vulgaris]
F01_cb12358_c8/f1p0/1728	[I]	Lipid transport and metabolism	--	K00671|0|sot:102582029|glycylpeptide N-tetradecanoyltransferase 1-like; K00671 glycylpeptide N-tetradecanoyltransferase [EC:2.3.1.97] (A)	--	[I]	Lipid transport and metabolism	Myristoyl-CoA:protein N-myristoyltransferase, C-terminal domain;; Myristoyl-CoA:protein N-myristoyltransferase, N-terminal domain	Glycylpeptide N-tetradecanoyltransferase 1 GN=NMT1 OS=Arabidopsis thaliana (Mouse-ear cress) PE=1 SV=2	I	Lipid transport and metabolism	PREDICTED: glycylpeptide N-tetradecanoyltransferase 1-like [Sesamum indicum]
F02_cb8601_c6/f1p0/3028	[C]	Energy production and conversion	Molecular Function: dihydrolipoyl dehydrogenase activity (GO:0004148);; Cellular Component: nucleolus (GO:0005730);; Cellular Component: mitochondrion (GO:0005739);; Cellular Component: cytosol (GO:0005829);; Biological Process: acetyl-CoA biosynthetic process from pyruvate (GO:0006086);; Molecular Function: electron carrier activity (GO:0009055);; Cellular Component: chloroplast stroma (GO:00095…	K00382|6.02575e-168|vvi:100246616|dihydrolipoyl dehydrogenase 2, chloroplastic; K00382 dihydrolipoamide dehydrogenase [EC:1.8.1.4] (A)	ko00010:Glycolysis / Gluconeogenesis;ko00020:Citrate cycle (TCA cycle);ko00260:Glycine, serine and threonine metabolism;ko00280:Valine, leucine and isoleucine degradation;ko00620:Pyruvate metabolism;ko01200:Carbon metabolism	[C]	Energy production and conversion	Pyridine nucleotide-disulphide oxidoreductase;; Pyridine nucleotide-disulphide oxidoreductase;; Glucose inhibited division protein A;; Thi4 family;; FAD binding domain;; Pyridine nucleotide-disulphide oxidoreductase, dimerisation domain	Dihydrolipoyl dehydrogenase 1, chloroplastic (Precursor) GN=LPD1 OS=Arabidopsis thaliana (Mouse-ear cress) PE=2 SV=1	C	Energy production and conversion	PREDICTED: dihydrolipoyl dehydrogenase 2, chloroplastic [Sesamum indicum]
F01_cb13299_c92/f1p0/1205	--	--	--	--	--	--	--	Extensin-like region	--	--	--	--
F02_cb19332_c0/f1p0/1133	[R]	General function prediction only	Biological Process: cell morphogenesis (GO:0000902);; Molecular Function: GTPase activity (GO:0003924);; Molecular Function: GTP binding (GO:0005525);; Cellular Component: vacuole (GO:0005773);; Cellular Component: Golgi apparatus (GO:0005794);; Cellular Component: plasma membrane (GO:0005886);; Biological Process: GTP catabolic process (GO:0006184);; Biological Process: protein targeting to vacu…	K07877|1.45818e-133|mus:103980326|ras-related protein RABB1c; K07877 Ras-related protein Rab-2A (A)	--	[U]	Intracellular trafficking, secretion, and vesicular transport	Ras family;; Miro-like protein;; ADP-ribosylation factor family;; 50S ribosome-binding GTPase;; Gtr1/RagA G protein conserved region;; Elongation factor Tu GTP binding domain	Ras-related protein RABB1c OS=Arabidopsis thaliana (Mouse-ear cress) PE=1 SV=1	S	Function unknown	PREDICTED: ras-related protein RABB1c [Sesamum indicum]
F02_cb5306_c18/f1p0/1760	[GEPR]	--	Cellular Component: integral component of membrane (GO:0016021);; Molecular Function: oxidoreductase activity (GO:0016491);; Molecular Function: substrate-specific transmembrane transporter activity (GO:0022891);; Biological Process: transmembrane transport (GO:0055085);;	K08145|8.43852e-140|fve:101306742|uncharacterized protein LOC101306742; K08145 MFS transporter, SP family, solute carrier family 2 (facilitated glucose transporter), member 8 (A)	--	[R]	General function prediction only	Sugar (and other) transporter;; Sugar (and other) transporter;; Sugar (and other) transporter	Sugar transporter ERD6-like 5 GN=At1g54730 OS=Arabidopsis thaliana (Mouse-ear cress) PE=2 SV=2	G	Carbohydrate transport and metabolism	PREDICTED: sugar transporter ERD6-like 5 [Sesamum indicum]
F01_cb12820_c4/f1p2/1552	[M]	Cell wall/membrane/envelope biogenesis	Biological Process: pentose-phosphate shunt (GO:0006098);; Cellular Component: chloroplast thylakoid membrane (GO:0009535);; Biological Process: photosynthetic electron transport in photosystem I (GO:0009773);; Biological Process: photosystem II assembly (GO:0010207);; Cellular Component: NAD(P)H dehydrogenase complex (plastoquinone) (GO:0010598);; Biological Process: carotenoid biosynthetic proc…	--	--	--	--	--	--	M	Cell wall/membrane/envelope biogenesis	PREDICTED: uncharacterized protein LOC105158308 [Sesamum indicum]
F01_cb17746_c1/f3p0/744	[TZDR]	--	Molecular Function: calcium ion binding (GO:0005509);;	K13448|7.34663e-96|sot:102595378|probable calcium-binding protein CML13-like; K13448 calcium-binding protein CML (A)	ko04626:Plant-pathogen interaction	[T]	Signal transduction mechanisms	EF-hand domain pair;; EF hand;; EF-hand domain;; EF-hand domain pair;; EF hand	Probable calcium-binding protein CML13 GN=CML13 OS=Arabidopsis thaliana (Mouse-ear cress) PE=2 SV=1	DTZ	--	hypothetical protein MIMGU_mgv1a015755mg [Erythranthe guttata]
F02_cb1346_c35/f1p1/2902	--	--	Molecular Function: sequence-specific DNA binding transcription factor activity (GO:0003700);; Cellular Component: nucleus (GO:0005634);; Biological Process: negative regulation of cell proliferation (GO:0008285);; Biological Process: auxin-activated signaling pathway (GO:0009734);; Biological Process: response to abscisic acid (GO:0009737);; Biological Process: positive regulation of flower deve…	--	--	--	--	Auxin response factor;; B3 DNA binding domain;; AUX/IAA family	Auxin response factor 2 GN=MTG10.3 OS=Arabidopsis thaliana (Mouse-ear cress) PE=1 SV=2	K	Transcription	hypothetical protein MIMGU_mgv1a001371mg [Erythranthe guttata]
F02_cb18340_c0/f1p0/1040	--	--	--	--	--	--	--	--	--	S	Function unknown	PREDICTED: uncharacterized protein LOC105169799 isoform X1 [Sesamum indicum]
F02_cb5926_c3/f1p0/1574	[GHR]	--	Molecular Function: lyase activity (GO:0016829);; Molecular Function: cation binding (GO:0043169);;	K01568|8.65618e-38|sita:101785721|pyruvate decarboxylase 2-like; K01568 pyruvate decarboxylase [EC:4.1.1.1] (A)	ko00010:Glycolysis / Gluconeogenesis	[EH]	--	--	Pyruvate decarboxylase 2 (Fragment) GN=PDC2 OS=Pisum sativum (Garden pea) PE=2 SV=1	GH	--	PREDICTED: pyruvate decarboxylase 2-like [Setaria italica]
F02_cb13455_c3/f1p0/1126	--	--	--	K13206|8.99856e-75|cmo:103492150|nuclear speckle splicing regulatory protein 1-like; K13206 coiled-coil domain-containing protein 55 (A)	--	[S]	Function unknown	Coiled-coil domain-containing protein 55 (DUF2040)	--	S	Function unknown	PREDICTED: LOW QUALITY PROTEIN: nuclear speckle splicing regulatory protein 1-like [Sesamum indicum]
F01_cb1371_c10/f1p0/3593	[I]	Lipid transport and metabolism	Molecular Function: phospholipase D activity (GO:0004630);; Molecular Function: calcium ion binding (GO:0005509);; Cellular Component: membrane (GO:0016020);; Biological Process: lipid catabolic process (GO:0016042);; Biological Process: phosphatidylcholine metabolic process (GO:0046470);; Molecular Function: N-acylphosphatidylethanolamine-specific phospholipase D activity (GO:0070290);;	K01115|0|sly:544181|PLDb1; phospholipase PLDb1; K01115 phospholipase D1/2 [EC:3.1.4.4] (A)	ko00564:Glycerophospholipid metabolism;ko00565:Ether lipid metabolism;ko04144:Endocytosis	[I]	Lipid transport and metabolism	Phospholipase D C terminal;; C2 domain;; Phospholipase D Active site motif;; PLD-like domain	Phospholipase D beta 1 GN=PLDBETA1 OS=Arabidopsis thaliana (Mouse-ear cress) PE=2 SV=4	I	Lipid transport and metabolism	PREDICTED: phospholipase D beta 1-like [Sesamum indicum]
F01_cb847_c6/f1p0/2581	--	--	--	K07765|4.60609e-112|tcc:TCM_026662|Protease m50 membrane-bound transcription factor site 2 protease, putative; K07765 S2P endopeptidase [EC:3.4.24.85] (A)	ko04141:Protein processing in endoplasmic reticulum	[O]	Posttranslational modification, protein turnover, chaperones	Peptidase family M50;; Peptidase family M50	--	M	Cell wall/membrane/envelope biogenesis	PREDICTED: membrane-bound transcription factor site-2 protease [Sesamum indicum]
F02_cb5923_c16/f1p0/2089	[GEPR]	--	--	--	--	[R]	General function prediction only	Major Facilitator Superfamily;; Major Facilitator Superfamily;; Sugar (and other) transporter	Protein ZINC INDUCED FACILITATOR-LIKE 1 GN=ZIFL1 OS=Arabidopsis thaliana (Mouse-ear cress) PE=2 SV=1	G	Carbohydrate transport and metabolism	PREDICTED: protein ZINC INDUCED FACILITATOR 1-like [Sesamum indicum]
F01_cb16585_c0/f2p0/940	--	--	Biological Process: regulation of transcription, DNA-templated (GO:0006355);;	--	--	--	--	AP2 domain	Ethylene-responsive transcription factor ERF025 GN=ERF025 OS=Arabidopsis thaliana (Mouse-ear cress) PE=2 SV=1	K	Transcription	hypothetical protein MIMGU_mgv1a019138mg [Erythranthe guttata]
F01_cb12992_c1/f1p0/2355	--	--	--	--	--	[T]	Signal transduction mechanisms	TraB family	--	S	Function unknown	hypothetical protein MIMGU_mgv1a007987mg [Erythranthe guttata]
F02_cb11041_c76309/f1p0/1855	[R]	General function prediction only	--	K11804|0|sot:102585248|DDB1- and CUL4-associated factor 8-like; K11804 WD repeat-containing protein 42A (A)	--	[R]	General function prediction only	WD domain, G-beta repeat	Protein pleiotropic regulator PRL2 GN=PRL2 OS=Arabidopsis thaliana (Mouse-ear cress) PE=2 SV=2	S	Function unknown	PREDICTED: DDB1- and CUL4-associated factor 8 [Sesamum indicum]
F01_cb11437_c4/f3p1/1641	[Q]	Secondary metabolites biosynthesis, transport and catabolism	Molecular Function: oxidoreductase activity (GO:0016491);; Molecular Function: metal ion binding (GO:0046872);;	--	--	[Q]	Secondary metabolites biosynthesis, transport and catabolism	Cytochrome P450	Cytochrome P450 83B1 GN=At4g31500 OS=Arabidopsis thaliana (Mouse-ear cress) PE=1 SV=1	Q	Secondary metabolites biosynthesis, transport and catabolism	cytochrome P450 CYP71AT92 [Salvia miltiorrhiza]
F02_cb5132_c19/f1p0/1955	--	--	--	--	--	[C]	Energy production and conversion	--	Sucrose nonfermenting 4-like protein GN=F7G19.11 OS=Arabidopsis thaliana (Mouse-ear cress) PE=1 SV=1	S	Function unknown	PREDICTED: sucrose nonfermenting 4-like protein [Sesamum indicum]
F02_cb6924_c0/f1p0/2454	--	--	Biological Process: glycerol ether metabolic process (GO:0006662);; Molecular Function: electron carrier activity (GO:0009055);; Cellular Component: chloroplast stroma (GO:0009570);; Biological Process: myo-inositol hexakisphosphate biosynthetic process (GO:0010264);; Molecular Function: protein disulfide oxidoreductase activity (GO:0015035);; Biological Process: cell redox homeostasis (GO:004545…	--	--	[KDR]	--	--	Thioredoxin-like 4, chloroplastic (Precursor) GN=At1g07700 OS=Arabidopsis thaliana (Mouse-ear cress) PE=2 SV=1	K	Transcription	PREDICTED: thioredoxin-like 4, chloroplastic [Sesamum indicum]
F01_cb12917_c0/f2p0/1587	--	--	--	--	--	--	--	Small acidic protein family	--	S	Function unknown	PREDICTED: arginine/serine-rich coiled-coil protein 2 [Sesamum indicum]
F02_cb1434_c1/f1p0/3796	[Z]	Cytoskeleton	Molecular Function: nucleotide binding (GO:0000166);; Cellular Component: microtubule cytoskeleton (GO:0015630);; Cellular Component: protein complex (GO:0043234);; Cellular Component: cytoskeletal part (GO:0044430);;	K10398|1.74087e-128|pxb:103948924|125 kDa kinesin-related protein-like; K10398 kinesin family member 11 (A)	--	[Z]	Cytoskeleton	Kinesin motor domain;; Kinesin motor domain	125 kDa kinesin-related protein GN=TKRP125 OS=Nicotiana tabacum (Common tobacco) PE=1 SV=1	Z	Cytoskeleton	PREDICTED: 125 kDa kinesin-related protein-like [Sesamum indicum]
F02_cb4694_c5/f1p0/2691	--	--	--	K13210|6.8493e-147|sly:101264287|far upstream element-binding protein 1-like; K13210 far upstream element-binding protein (A)	--	[A]	RNA processing and modification	KH domain;; KH domain;; KH domain;; KH domain	--	S	Function unknown	PREDICTED: far upstream element-binding protein 2 isoform X2 [Sesamum indicum]
F02_cb9553_c4/f1p0/2052	--	--	Biological Process: carbohydrate metabolic process (GO:0005975);; Cellular Component: plasmodesma (GO:0009506);; Molecular Function: glucan endo-1,3-beta-D-glucosidase activity (GO:0042973);; Molecular Function: cation binding (GO:0043169);; Cellular Component: anchored component of plasma membrane (GO:0046658);;	--	--	--	--	Glycosyl hydrolases family 17;; X8 domain;; Glycosyl hydrolases family 17	Glucan endo-1,3-beta-glucosidase 5 (Precursor) GN=At4g31140 OS=Arabidopsis thaliana (Mouse-ear cress) PE=1 SV=1	G	Carbohydrate transport and metabolism	PREDICTED: glucan endo-1,3-beta-glucosidase 6-like [Sesamum indicum]
F01_cb5044_c5/f1p0/1638	--	--	--	K13199|2.50135e-82|sot:102590961|plasminogen activator inhibitor 1 RNA-binding protein-like; K13199 plasminogen activator inhibitor 1 RNA-binding protein (A)	--	[R]	General function prediction only	Hyaluronan / mRNA binding family;; Stm1	--	S	Function unknown	PREDICTED: RNA-binding protein FUS isoform X1 [Sesamum indicum]
F02_cb2943_c1/f2p0/2884	[M]	Cell wall/membrane/envelope biogenesis	--	--	--	[M]	Cell wall/membrane/envelope biogenesis	Mechanosensitive ion channel	Mechanosensitive ion channel protein 10 GN=MSL10 OS=Arabidopsis thaliana (Mouse-ear cress) PE=1 SV=1	M	Cell wall/membrane/envelope biogenesis	PREDICTED: mechanosensitive ion channel protein 10-like [Sesamum indicum]
F02_cb4454_c26/f1p0/2773	[S]	Function unknown	Biological Process: transmembrane transport (GO:0055085);;	--	--	--	--	OPT oligopeptide transporter protein;; OPT oligopeptide transporter protein;; OPT oligopeptide transporter protein	Metal-nicotianamine transporter YSL2 GN=YSL2 OS=Arabidopsis thaliana (Mouse-ear cress) PE=1 SV=1	S	Function unknown	PREDICTED: metal-nicotianamine transporter YSL3-like isoform X2 [Nicotiana sylvestris]
F02_cb3166_c1/f1p0/2656	[R]	General function prediction only	Molecular Function: iron ion binding (GO:0005506);; Cellular Component: cytoplasm (GO:0005737);; Biological Process: aging (GO:0007568);; Biological Process: cellular response to starvation (GO:0009267);; Molecular Function: oxidoreductase activity, acting on paired donors, with incorporation or reduction of molecular oxygen, 2-oxoglutarate as one donor, and incorporation of one atom each of oxyg…	K06892|8.80042e-59|cmo:103501113|probable 2-oxoglutarate-dependent dioxygenase At3g49630; K06892 feruloyl-CoA ortho-hydroxylase [EC:1.14.11.-] (A)	--	[QR]	--	2OG-Fe(II) oxygenase superfamily	Probable 2-oxoglutarate-dependent dioxygenase At3g49630 GN=At3g50210 OS=Arabidopsis thaliana (Mouse-ear cress) PE=2 SV=1	S	Function unknown	PREDICTED: probable 2-oxoglutarate-dependent dioxygenase At3g49630 isoform X1 [Sesamum indicum]
F02_cb719_c11/f3p0/2332	--	--	--	--	--	--	--	HEAT repeats;; HEAT repeat;; HEAT-like repeat	Microtubule-associated protein SPIRAL2-like GN=SP2L OS=Arabidopsis thaliana (Mouse-ear cress) PE=2 SV=1	S	Function unknown	PREDICTED: microtubule-associated protein TORTIFOLIA1-like [Sesamum indicum]
F01_cb10878_c7/f3p0/1568	--	--	Cellular Component: vacuole (GO:0005773);;	K14503|9.91427e-110|pxb:103941280|BES1/BZR1 homolog protein 2-like; K14503 brassinosteroid resistant 1/2 (A)	ko04075:Plant hormone signal transduction	--	--	Plant protein of unknown function (DUF822)	BES1/BZR1 homolog protein 2 GN=BEH2 OS=Arabidopsis thaliana (Mouse-ear cress) PE=1 SV=1	K	Transcription	PREDICTED: BES1/BZR1 homolog protein 2-like [Sesamum indicum]
F01_cb12259_c2/f1p0/1446	--	--	--	--	--	[U]	Intracellular trafficking, secretion, and vesicular transport	Endonuclease/Exonuclease/phosphatase family	Type I inositol 1,4,5-trisphosphate 5-phosphatase CVP2 GN=CVP2 OS=Arabidopsis thaliana (Mouse-ear cress) PE=1 SV=2	T	Signal transduction mechanisms	PREDICTED: type I inositol 1,4,5-trisphosphate 5-phosphatase CVP2 isoform X2 [Sesamum indicum]
F02_cb18442_c0/f2p0/800	--	--	--	--	--	--	--	--	--	S	Function unknown	PREDICTED: histone-lysine N-methyltransferase, H3 lysine-79 specific-like isoform X1 [Sesamum indicum]
F01_cb16438_c38546/f1p0/2747	--	--	--	--	--	--	--	ATHILA ORF-1 family	--	--	--	hypothetical protein JCGZ_18398 [Jatropha curcas]
F02_cb3664_c4/f1p0/2868	[RTKL]	--	--	--	--	--	--	U-box domain	U-box domain-containing protein 32 GN=PUB32 OS=Arabidopsis thaliana (Mouse-ear cress) PE=2 SV=1	T	Signal transduction mechanisms	hypothetical protein PHAVU_005G143600g [Phaseolus vulgaris]
F01_cb16438_c46196/f1p0/4176	--	--	--	--	--	[T]	Signal transduction mechanisms	NB-ARC domain;; AAA domain	Putative late blight resistance protein homolog R1B-17 GN=R1B-17 OS=Solanum demissum (Wild potato) PE=3 SV=1	S	Function unknown	hypothetical protein MIMGU_mgv1a019724mg, partial [Erythranthe guttata]
F01_cb15399_c2/f2p0/558	[B]	Chromatin structure and dynamics	Cellular Component: nucleosome (GO:0000786);; Molecular Function: DNA binding (GO:0003677);; Cellular Component: nucleolus (GO:0005730);; Cellular Component: mitochondrion (GO:0005739);; Cellular Component: vacuolar membrane (GO:0005774);; Cellular Component: Golgi apparatus (GO:0005794);; Cellular Component: cytosol (GO:0005829);; Cellular Component: plasma membrane (GO:0005886);; Biological Pro…	K11254|3.53821e-55|aly:ARALYDRAFT_496134|hypothetical protein; K11254 histone H4 (A)	--	[B]	Chromatin structure and dynamics	--	Histone H4 OS=Glycine max (Soybean) PE=3 SV=1	B	Chromatin structure and dynamics	hypothetical protein ZEAMMB73_313798 [Zea mays]
F01_cb9641_c20/f1p0/1748	--	--	--	K14500|0|sot:102604642|probable serine/threonine-protein kinase At4g35230-like; K14500 BR-signaling kinase [EC:2.7.11.1] (A)	ko04075:Plant hormone signal transduction	--	--	TPR repeat;; Protein tyrosine kinase;; Protein kinase domain	Probable serine/threonine-protein kinase At4g35230 GN=At4g35230 OS=Arabidopsis thaliana (Mouse-ear cress) PE=1 SV=1	T	Signal transduction mechanisms	PREDICTED: probable serine/threonine-protein kinase At4g35230 [Sesamum indicum]
F02_cb9681_c12/f1p0/3375	[RTKL]	--	Molecular Function: protein serine/threonine kinase activity (GO:0004674);; Molecular Function: ATP binding (GO:0005524);; Biological Process: protein phosphorylation (GO:0006468);;	K02218|1.22731e-154|csv:101224845|casein kinase I isoform delta-like; K02218 casein kinase 1 [EC:2.7.11.1] (A)	--	[T]	Signal transduction mechanisms	Protein kinase domain;; Protein tyrosine kinase	Casein kinase I isoform delta-like GN=At4g26100 OS=Arabidopsis thaliana (Mouse-ear cress) PE=2 SV=2	T	Signal transduction mechanisms	PREDICTED: casein kinase I-like [Sesamum indicum]
F02_cb2629_c2/f1p0/2455	--	--	Biological Process: nuclear-transcribed mRNA catabolic process (GO:0000956);; Biological Process: RNA processing (GO:0006396);; Biological Process: response to salt stress (GO:0009651);;	K12850|1.27876e-69|sot:102596091|pre-mRNA-splicing factor 38B-like; K12850 pre-mRNA-splicing factor 38B (A)	ko03040:Spliceosome	[R]	General function prediction only	Pre-mRNA-splicing factor 38-associated hydrophilic C-term;; PRP38 family	--	A	RNA processing and modification	PREDICTED: LOW QUALITY PROTEIN: pre-mRNA-splicing factor 38B-like [Sesamum indicum]
F01_cb22267_c1/f1p0/4924	[B]	Chromatin structure and dynamics	--	K11644|0|cic:CICLE_v10010908mg|hypothetical protein; K11644 paired amphipathic helix protein Sin3a (A)	--	[B]	Chromatin structure and dynamics	Paired amphipathic helix repeat;; Paired amphipathic helix repeat;; Sin3 family co-repressor	Paired amphipathic helix protein Sin3-like 2 GN=SNL2 OS=Arabidopsis thaliana (Mouse-ear cress) PE=1 SV=2	B	Chromatin structure and dynamics	PREDICTED: paired amphipathic helix protein Sin3-like 2 isoform X1 [Sesamum indicum]
F02_cb1504_c22/f1p0/2098	[P]	Inorganic ion transport and metabolism	Molecular Function: potassium ion transmembrane transporter activity (GO:0015079);; Cellular Component: membrane (GO:0016020);; Biological Process: potassium ion transmembrane transport (GO:0071805);;	K03549|0|sot:102604250|potassium transporter 4-like; K03549 KUP system potassium uptake protein (A)	--	--	--	K+ potassium transporter;; K+ potassium transporter;; K+ potassium transporter	Potassium transporter 4 GN=F1C9.17 OS=Arabidopsis thaliana (Mouse-ear cress) PE=1 SV=2	P	Inorganic ion transport and metabolism	PREDICTED: potassium transporter 4-like [Sesamum indicum]
F02_cb2183_c6/f1p0/3648	[RTKL]	--	--	--	--	--	--	Protein tyrosine kinase;; Protein kinase domain;; Leucine Rich repeats (2 copies);; Leucine rich repeat;; Leucine Rich Repeat;; Leucine Rich repeat	Probable LRR receptor-like serine/threonine-protein kinase RFK1 (Precursor) GN=RKF1 OS=Arabidopsis thaliana (Mouse-ear cress) PE=1 SV=1	T	Signal transduction mechanisms	hypothetical protein MIMGU_mgv1a000913mg [Erythranthe guttata]
F01_cb17346_c4/f1p0/1589	--	--	--	--	--	[R]	General function prediction only	Putative serine esterase (DUF676)	--	S	Function unknown	PREDICTED: putative lipase YOR059C [Sesamum indicum]
F02_cb738_c20/f1p0/1649	[P]	Inorganic ion transport and metabolism	Molecular Function: potassium ion transmembrane transporter activity (GO:0015079);; Cellular Component: membrane (GO:0016020);; Biological Process: potassium ion transmembrane transport (GO:0071805);;	K03549|0|sly:101247871|potassium transporter 11-like; K03549 KUP system potassium uptake protein (A)	--	--	--	K+ potassium transporter	Potassium transporter 10 GN=F28K20.5 OS=Arabidopsis thaliana (Mouse-ear cress) PE=2 SV=2	P	Inorganic ion transport and metabolism	hypothetical protein MIMGU_mgv1a001579mg [Erythranthe guttata]
F01_cb12274_c114/f1p0/2115	--	--	Molecular Function: ion binding (GO:0043167);;	--	--	--	--	--	--	--	--	hypothetical protein VITISV_036973 [Vitis vinifera]
F01_cb11314_c2/f1p1/1888	--	--	--	--	--	[R]	General function prediction only	SNARE associated Golgi protein	Vacuole membrane protein KMS1 {ECO:0000303|PubMed:21294794} OS=Arabidopsis thaliana (Mouse-ear cress) PE=1 SV=1	S	Function unknown	PREDICTED: vacuole membrane protein KMS1 [Sesamum indicum]
F02_cb12042_c6/f1p0/1769	--	--	--	--	--	--	--	--	--	S	Function unknown	PREDICTED: uncharacterized protein LOC105166752 isoform X2 [Sesamum indicum]
F01_cb17261_c2/f3p1/394	--	--	--	--	--	--	--	Extensin-like region	--	--	--	--
F02_cb14603_c0/f1p0/1231	[M]	Cell wall/membrane/envelope biogenesis	--	K02535|4.72212e-133|vvi:100266270|probable UDP-3-O-[3-hydroxymyristoyl] N-acetylglucosamine deacetylase 2; K02535 UDP-3-O-[3-hydroxymyristoyl] N-acetylglucosamine deacetylase [EC:3.5.1.108] (A)	--	--	--	UDP-3-O-acyl N-acetylglycosamine deacetylase	Probable UDP-3-O-[3-hydroxymyristoyl] N-acetylglucosamine deacetylase 1 (Precursor) GN=LPXC1 OS=Arabidopsis thaliana (Mouse-ear cress) PE=2 SV=2	M	Cell wall/membrane/envelope biogenesis	PREDICTED: probable UDP-3-O-[3-hydroxymyristoyl] N-acetylglucosamine deacetylase 2 [Sesamum indicum]
F01_cb16438_c38609/f2p0/1608	--	--	--	--	--	--	--	F-box domain;; F-box-like;; F-box associated	Putative F-box protein At3g16210 GN=At3g16210 OS=Arabidopsis thaliana (Mouse-ear cress) PE=3 SV=1	S	Function unknown	hypothetical protein MIMGU_mgv1a024254mg, partial [Erythranthe guttata]
F01_cb9878_c13/f1p0/2043	[M]	Cell wall/membrane/envelope biogenesis	Biological Process: biosynthetic process (GO:0009058);; Molecular Function: transferase activity (GO:0016740);;	K06119|0|sot:102582787|phosphatidylinositol N-acetylglucosaminyltransferase GPI3 subunit-like; K06119 sulfoquinovosyltransferase [EC:2.4.1.-] (A)	ko00561:Glycerolipid metabolism	[MOI]	--	Glycosyl transferases group 1;; Glycosyl transferase 4-like domain;; Glycosyl transferases group 1;; Glycosyltransferase Family 4;; Glycosyl transferase 4-like;; Glycosyl transferases group 1	--	M	Cell wall/membrane/envelope biogenesis	PREDICTED: uncharacterized protein LOC104089958 isoform X1 [Nicotiana tomentosiformis]
F02_cb7750_c12/f1p1/2226	[PR]	--	Molecular Function: iron ion binding (GO:0005506);; Biological Process: aromatic amino acid family biosynthetic process (GO:0009073);; Cellular Component: chloroplast thylakoid membrane (GO:0009535);; Cellular Component: chloroplast inner membrane (GO:0009706);; Biological Process: leaf morphogenesis (GO:0009965);; Molecular Function: chlorophyllide a oxygenase [overall] activity (GO:0010277);; B…	K13600|0|tcc:TCM_035122|Pheophorbide a oxygenase family protein with Rieske domain isoform 1; K13600 chlorophyllide a oxygenase [EC:1.14.13.122] (A)	ko00860:Porphyrin and chlorophyll metabolism	--	--	Pheophorbide a oxygenase;; Rieske [2Fe-2S] domain	Chlorophyllide a oxygenase, chloroplastic (Precursor) GN=OSJNBa0057L21.2 OS=Oryza sativa subsp. japonica (Rice) PE=2 SV=1	P	Inorganic ion transport and metabolism	PREDICTED: chlorophyllide a oxygenase, chloroplastic-like [Sesamum indicum]
F01_cb7729_c1/f2p0/2091	[P]	Inorganic ion transport and metabolism	Cellular Component: mitochondrion (GO:0005739);; Cellular Component: chloroplast stroma (GO:0009570);; Biological Process: nitrate transport (GO:0015706);; Cellular Component: membrane (GO:0016020);; Biological Process: cysteine biosynthetic process (GO:0019344);; Molecular Function: heme binding (GO:0020037);; Molecular Function: ferredoxin-nitrate reductase activity (GO:0047889);; Cellular Comp…	K00366|0|vvi:100253671|ferredoxin--nitrite reductase, chloroplastic-like; K00366 ferredoxin-nitrite reductase [EC:1.7.7.1] (A)	ko00910:Nitrogen metabolism	[P]	Inorganic ion transport and metabolism	Nitrite and sulphite reductase 4Fe-4S domain;; Nitrite/Sulfite reductase ferredoxin-like half domain;; Nitrite/Sulfite reductase ferredoxin-like half domain;; Nitrite and sulphite reductase 4Fe-4S domain	Ferredoxin--nitrite reductase, chloroplastic (Precursor) GN=NIR OS=Spinacia oleracea (Spinach) PE=1 SV=1	C	Energy production and conversion	PREDICTED: ferredoxin--nitrite reductase, chloroplastic [Sesamum indicum]
F02_cb11041_c75202/f1p0/4334	[RTKL]	--	Molecular Function: protein kinase activity (GO:0004672);; Cellular Component: cytoplasm (GO:0005737);; Biological Process: protein phosphorylation (GO:0006468);; Biological Process: signal transduction (GO:0007165);; Biological Process: response to blue light (GO:0009637);; Biological Process: response to red or far red light (GO:0009639);; Biological Process: chloroplast relocation (GO:0009902)…	K08282|0|vvi:100262213|phototropin-1; K08282 non-specific serine/threonine protein kinase [EC:2.7.11.1] (A)	--	--	--	PAS domain;; PAS fold;; PAS fold;; PAS fold;; Protein kinase domain;; Protein tyrosine kinase;; Kinase-like	Phototropin-1 GN=T6D9_110 OS=Arabidopsis thaliana (Mouse-ear cress) PE=1 SV=1	T	Signal transduction mechanisms	PREDICTED: LOW QUALITY PROTEIN: phototropin-1 [Sesamum indicum]
F01_cb258_c14/f1p0/3474	[TK]	--	Molecular Function: phosphoric diester hydrolase activity (GO:0008081);; Molecular Function: GTP diphosphokinase activity (GO:0008728);; Cellular Component: chloroplast (GO:0009507);; Biological Process: response to wounding (GO:0009611);; Biological Process: guanosine tetraphosphate metabolic process (GO:0015969);; Molecular Function: metal ion binding (GO:0046872);;	--	--	[T]	Signal transduction mechanisms	HD domain;; Region found in RelA / SpoT proteins;; TGS domain;; HD domain	Putative GTP diphosphokinase RSH1, chloroplastic (Precursor) GN=RSH1 OS=Arabidopsis thaliana (Mouse-ear cress) PE=1 SV=1	KT	--	PREDICTED: putative GTP diphosphokinase RSH1, chloroplastic [Sesamum indicum]
F02_cb18332_c2/f1p0/592	--	--	Biological Process: transport (GO:0006810);; Biological Process: cellular process (GO:0009987);; Cellular Component: intracellular membrane-bounded organelle (GO:0043231);;	--	--	--	--	--	--	S	Function unknown	PREDICTED: uncharacterized protein LOC100802494, partial [Glycine max]
F01_cb2605_c4/f1p0/2992	--	--	Molecular Function: zinc ion binding (GO:0008270);;	--	--	--	--	FAR1 DNA-binding domain;; MULE transposase domain	Protein FAR1-RELATED SEQUENCE 8 GN=FRS8 OS=Arabidopsis thaliana (Mouse-ear cress) PE=2 SV=2	S	Function unknown	PREDICTED: protein FAR1-RELATED SEQUENCE 6-like [Sesamum indicum]
F01_cb18934_c0/f1p0/1405	--	--	--	--	--	--	--	--	--	S	Function unknown	PREDICTED: uncharacterized protein LOC105164542 [Sesamum indicum]
F01_cb9827_c1/f1p0/1393	--	--	--	--	--	--	--	Protein tyrosine kinase;; Protein kinase domain	Putative kinase-like protein TMKL1 (Precursor) GN=TMKL1 OS=Arabidopsis thaliana (Mouse-ear cress) PE=1 SV=1	S	Function unknown	PREDICTED: putative kinase-like protein TMKL1 [Sesamum indicum]
F02_cb15431_c11/f1p0/711	--	--	Biological Process: metal ion transport (GO:0030001);; Molecular Function: metal ion binding (GO:0046872);;	--	--	[P]	Inorganic ion transport and metabolism	Heavy-metal-associated domain	Putative late blight resistance protein homolog R1B-12 GN=R1B-12 OS=Solanum demissum (Wild potato) PE=3 SV=2	S	Function unknown	hypothetical protein MIMGU_mgv11b013063mg [Erythranthe guttata]
F01_cb13583_c6/f1p0/438	--	--	Cellular Component: mitochondrial intermembrane space (GO:0005758);; Biological Process: copper ion transport (GO:0006825);; Molecular Function: copper chaperone activity (GO:0016531);;	K02260|7.38288e-32|tcc:TCM_031514|Cytochrome C oxidase copper chaperone isoform 1; K02260 cytochrome c oxidase assembly protein subunit 17 (A)	ko00190:Oxidative phosphorylation	[O]	Posttranslational modification, protein turnover, chaperones	Cytochrome C oxidase copper chaperone (COX17)	Cytochrome c oxidase copper chaperone 1 GN=K7L4.21 OS=Arabidopsis thaliana (Mouse-ear cress) PE=2 SV=1	O	Posttranslational modification, protein turnover, chaperones	PREDICTED: cytochrome c oxidase copper chaperone 1 [Sesamum indicum]
F02_cb8709_c4/f1p0/1183	--	--	Molecular Function: serine-type endopeptidase activity (GO:0004252);; Cellular Component: integral component of membrane (GO:0016021);;	--	--	[S]	Function unknown	Eukaryotic integral membrane protein (DUF1751);; Rhomboid family	--	S	Function unknown	PREDICTED: transmembrane protein 115-like [Sesamum indicum]
F02_cb8111_c11/f1p0/2166	[J]	Translation, ribosomal structure and biogenesis	Molecular Function: proline-tRNA ligase activity (GO:0004827);; Molecular Function: ATP binding (GO:0005524);; Cellular Component: cytoplasm (GO:0005737);; Biological Process: prolyl-tRNA aminoacylation (GO:0006433);;	K01881|0|sly:101260238|putative proline--tRNA ligase C19C7.06; K01881 prolyl-tRNA synthetase [EC:6.1.1.15] (A)	ko00970:Aminoacyl-tRNA biosynthesis	[J]	Translation, ribosomal structure and biogenesis	tRNA synthetase class II core domain (G, H, P, S and T);; Anticodon binding domain;; Prolyl-tRNA synthetase, C-terminal	--	J	Translation, ribosomal structure and biogenesis	PREDICTED: putative proline--tRNA ligase C19C7.06 [Sesamum indicum]
F01_cb16438_c45741/f1p1/1823	[R]	General function prediction only	Molecular Function: nucleotide binding (GO:0000166);;	K06883|0|mdm:103455886|GPN-loop GTPase 2-like; K06883 (A)	--	[R]	General function prediction only	Conserved hypothetical ATP binding protein;; AAA domain	--	S	Function unknown	PREDICTED: GPN-loop GTPase 2 isoform X1 [Sesamum indicum]
F01_cb13047_c4/f2p0/1413	--	--	Molecular Function: structural molecule activity (GO:0005198);; Cellular Component: plasma membrane (GO:0005886);; Biological Process: retrograde vesicle-mediated transport, Golgi to ER (GO:0006890);;	K17268|5.62453e-170|sot:102581548|coatomer subunit epsilon-1-like; K17268 coatomer protein complex, subunit epsilon (A)	--	[U]	Intracellular trafficking, secretion, and vesicular transport	Coatomer epsilon subunit;; TPR repeat;; Tetratricopeptide repeat;; Tetratricopeptide repeat	Coatomer subunit epsilon-1 GN=At1g30630 OS=Arabidopsis thaliana (Mouse-ear cress) PE=2 SV=1	U	Intracellular trafficking, secretion, and vesicular transport	PREDICTED: coatomer subunit epsilon-1 [Sesamum indicum]
F01_cb10536_c2/f3p0/1287	[R]	General function prediction only	--	K14004|0|sly:101265789|protein transport protein SEC13 homolog B; K14004 protein transport protein SEC13 (A)	ko03013:RNA transport;ko04141:Protein processing in endoplasmic reticulum	[U]	Intracellular trafficking, secretion, and vesicular transport	WD domain, G-beta repeat	Protein transport protein SEC13 homolog B {ECO:0000305} OS=Arabidopsis thaliana (Mouse-ear cress) PE=1 SV=1	U	Intracellular trafficking, secretion, and vesicular transport	PREDICTED: protein transport protein SEC13 homolog B-like [Sesamum indicum]
F01_cb16438_c41212/f1p0/2659	[R]	General function prediction only	Molecular Function: ATP binding (GO:0005524);; Biological Process: ATP catabolic process (GO:0006200);; Molecular Function: organic phosphonate transmembrane-transporting ATPase activity (GO:0015416);;	K06184|0|cmo:103501091|ABC transporter F family member 4-like; K06184 ATP-binding cassette, subfamily F, member 1 (A)	--	[J]	Translation, ribosomal structure and biogenesis	ABC transporter;; AAA domain;; RecF/RecN/SMC N terminal domain;; Protein of unknown function, DUF258;; AAA domain;; P-loop containing region of AAA domain;; AAA domain;; ATPase family associated with various cellular activities (AAA);; AAA domain;; AAA ATPase domain;; 50S ribosome-binding GTPase;; Miro-like protein;; NACHT domain	ABC transporter F family member 4 GN=T14E10.110 OS=Arabidopsis thaliana (Mouse-ear cress) PE=2 SV=1	S	Function unknown	hypothetical protein JCGZ_16332 [Jatropha curcas]
F02_cb3840_c59/f1p1/2266	--	--	--	--	--	--	--	--	Transcription factor bHLH143 GN=T5E8.260 OS=Arabidopsis thaliana (Mouse-ear cress) PE=2 SV=1	K	Transcription	PREDICTED: transcription factor bHLH143 [Sesamum indicum]
F01_cb4005_c4/f1p0/2369	[RTKL]	--	Molecular Function: protein kinase activity (GO:0004672);; Biological Process: phosphorylation (GO:0016310);; Biological Process: cellular macromolecule metabolic process (GO:0044260);;	--	--	--	--	Protein kinase domain;; Protein tyrosine kinase	Chitin elicitor receptor kinase 1 (Precursor) GN=MIL23.20 OS=Arabidopsis thaliana (Mouse-ear cress) PE=1 SV=1	T	Signal transduction mechanisms	PREDICTED: protein LYK5-like [Sesamum indicum]
F02_cb11041_c44567/f1p0/1298	--	--	--	--	--	--	--	Large coat protein;; Small coat protein	--	--	--	--
F02_cb500_c17/f1p0/2645	--	--	--	--	--	[T]	Signal transduction mechanisms	NB-ARC domain	Putative late blight resistance protein homolog R1B-16 GN=R1B-16 OS=Solanum demissum (Wild potato) PE=3 SV=1	S	Function unknown	hypothetical protein MIMGU_mgv1a026464mg, partial [Erythranthe guttata]
F01_cb10142_c5/f1p0/1743	[IQR]	--	--	--	--	[Q]	Secondary metabolites biosynthesis, transport and catabolism	short chain dehydrogenase	Short-chain dehydrogenase TIC 32, chloroplastic GN=TIC32 OS=Arabidopsis thaliana (Mouse-ear cress) PE=2 SV=1	S	Function unknown	PREDICTED: dehydrogenase/reductase SDR family member on chromosome X-like isoform X1 [Sesamum indicum]
F02_cb17327_c5/f1p1/705	--	--	--	--	--	--	--	Protein of unknown function (DUF640)	Protein LIGHT-DEPENDENT SHORT HYPOCOTYLS 10 GN=F14N22 OS=Arabidopsis thaliana (Mouse-ear cress) PE=1 SV=1	S	Function unknown	PREDICTED: protein LIGHT-DEPENDENT SHORT HYPOCOTYLS 10-like, partial [Sesamum indicum]
F02_cb6805_c10/f1p0/3564	[RTKL]	--	Molecular Function: protein serine/threonine kinase activity (GO:0004674);; Molecular Function: ATP binding (GO:0005524);; Biological Process: protein phosphorylation (GO:0006468);; Cellular Component: integral component of membrane (GO:0016021);;	K13416|0|sly:100736467|SERK3A; somatic embryogenesis receptor kinase 3A; K13416 brassinosteroid insensitive 1-associated receptor kinase 1 [EC:2.7.10.1 2.7.11.1] (A)	ko04075:Plant hormone signal transduction;ko04626:Plant-pathogen interaction	[T]	Signal transduction mechanisms	Protein kinase domain;; Protein tyrosine kinase;; Phosphotransferase enzyme family;; Leucine rich repeat N-terminal domain;; Leucine Rich repeats (2 copies);; Leucine Rich Repeat	BRASSINOSTEROID INSENSITIVE 1-associated receptor kinase 1 (Precursor) GN=F17M5.190 OS=Arabidopsis thaliana (Mouse-ear cress) PE=1 SV=2	T	Signal transduction mechanisms	somatic embryogenesis receptor kinase 3A precursor [Solanum lycopersicum]
F02_cb279_c21/f1p0/3161	--	--	Molecular Function: small GTPase regulator activity (GO:0005083);; Biological Process: protein N-linked glycosylation (GO:0006487);; Biological Process: protein targeting to vacuole (GO:0006623);; Biological Process: vacuole organization (GO:0007033);; Cellular Component: plasmodesma (GO:0009506);; Biological Process: embryo development ending in seed dormancy (GO:0009793);; Biological Process: v…	--	--	[U]	Intracellular trafficking, secretion, and vesicular transport	Vacuolar sorting protein 39 domain 1;; Region in Clathrin and VPS;; CNH domain;; Vacuolar sorting protein 39 domain 2	--	U	Intracellular trafficking, secretion, and vesicular transport	PREDICTED: vam6/Vps39-like protein [Sesamum indicum]
F01_cb8065_c4/f1p0/1568	[M]	Cell wall/membrane/envelope biogenesis	Molecular Function: GDP-Man:Man1GlcNAc2-PP-Dol alpha-1,3-mannosyltransferase activity (GO:0004378);; Biological Process: biosynthetic process (GO:0009058);; Molecular Function: glycolipid 6-alpha-mannosyltransferase activity (GO:0033164);;	K03843|1.58577e-77|mtr:MTR_1g104880|Alpha-1,3-mannosyltransferase ALG2; K03843 alpha-1,3/alpha-1,6-mannosyltransferase [EC:2.4.1.132 2.4.1.257] (A)	ko00510:N-Glycan biosynthesis	[M]	Cell wall/membrane/envelope biogenesis	Glycosyl transferases group 1	--	M	Cell wall/membrane/envelope biogenesis	PREDICTED: alpha-1,3/1,6-mannosyltransferase ALG2 [Sesamum indicum]
F02_cb9705_c13/f1p0/2441	--	--	--	--	--	--	--	--	--	--	--	hypothetical protein MIMGU_mgv1a009154mg [Erythranthe guttata]
F02_cb9330_c52/f1p0/1593	[G]	Carbohydrate transport and metabolism	Biological Process: carbohydrate metabolic process (GO:0005975);; Biological Process: seed germination (GO:0009845);; Biological Process: determination of bilateral symmetry (GO:0009855);; Biological Process: polarity specification of adaxial/abaxial axis (GO:0009944);; Biological Process: meristem initiation (GO:0010014);; Biological Process: regulation of meristem growth (GO:0010075);; Molecula…	--	--	--	--	Cellulase (glycosyl hydrolase family 5)	Mannan endo-1,4-beta-mannosidase 7 (Precursor) GN=MAN7 OS=Arabidopsis thaliana (Mouse-ear cress) PE=2 SV=1	G	Carbohydrate transport and metabolism	PREDICTED: mannan endo-1,4-beta-mannosidase 7 [Sesamum indicum]
F02_cb5234_c11/f1p0/2731	--	--	Cellular Component: vacuole (GO:0005773);; Cellular Component: endoplasmic reticulum (GO:0005783);; Biological Process: lipid metabolic process (GO:0006629);; Molecular Function: O-acyltransferase activity (GO:0008374);; Molecular Function: phospholipid:diacylglycerol acyltransferase activity (GO:0046027);;	K00679|7.19202e-154|pop:POPTR_0003s06140g|POPTRDRAFT_854288; lecithin:cholesterol acyltransferase family protein; K00679 phospholipid:diacylglycerol acyltransferase [EC:2.3.1.158] (A)	ko00561:Glycerolipid metabolism	[I]	Lipid transport and metabolism	Lecithin:cholesterol acyltransferase;; Lecithin:cholesterol acyltransferase;; Lecithin:cholesterol acyltransferase	Phospholipid:diacylglycerol acyltransferase 1 OS=Arabidopsis thaliana (Mouse-ear cress) PE=2 SV=1	S	Function unknown	hypothetical protein JCGZ_24718 [Jatropha curcas]
F01_cb2483_c1/f1p0/3312	--	--	Biological Process: cellular process (GO:0009987);;	--	--	[R]	General function prediction only	PPR repeat family;; PPR repeat;; Pentatricopeptide repeat domain;; PPR repeat;; Evolutionarily conserved signalling intermediate in Toll pathway	Pentatricopeptide repeat-containing protein At4g30825, chloroplastic (Precursor) GN=At4g30825 OS=Arabidopsis thaliana (Mouse-ear cress) PE=2 SV=2	S	Function unknown	PREDICTED: pentatricopeptide repeat-containing protein At4g30825, chloroplastic [Sesamum indicum]
F02_cb18604_c8/f1p0/650	[P]	Inorganic ion transport and metabolism	Molecular Function: protein tyrosine phosphatase activity (GO:0004725);; Cellular Component: mitochondrion (GO:0005739);; Biological Process: protein phosphorylation (GO:0006468);; Cellular Component: chloroplast (GO:0009507);; Molecular Function: arsenate reductase activity (GO:0030611);; Biological Process: peptidyl-tyrosine dephosphorylation (GO:0035335);; Biological Process: response to arsen…	K18065|1.9249e-60|vvi:100260619|dual specificity phosphatase Cdc25; K18065 Cdc25 family phosphatase [EC:3.1.3.48 1.20.4.-] (A)	--	[D]	Cell cycle control, cell division, chromosome partitioning	Rhodanese-like domain	Dual specificity phosphatase Cdc25 GN=F12E4_220 OS=Arabidopsis thaliana (Mouse-ear cress) PE=1 SV=1	P	Inorganic ion transport and metabolism	unnamed protein product [Coffea canephora]
F01_cb14895_c101/f1p2/638	--	--	Cellular Component: photosystem I (GO:0009522);; Cellular Component: photosystem II (GO:0009523);; Cellular Component: chloroplast thylakoid membrane (GO:0009535);; Biological Process: photosynthesis, light harvesting (GO:0009765);; Cellular Component: integral component of membrane (GO:0016021);; Molecular Function: chlorophyll binding (GO:0016168);; Biological Process: protein-chromophore linka…	K08912|8.01143e-61|atr:s00006p00251360|AMTR_s00006p00251360; hypothetical protein; K08912 light-harvesting complex II chlorophyll a/b binding protein 1 (A)	ko00196:Photosynthesis - antenna proteins	--	--	--	Chlorophyll a-b binding protein type 2 member 1B, chloroplastic (Precursor) OS=Pinus sylvestris (Scots pine) PE=2 SV=1	J	Translation, ribosomal structure and biogenesis	RecName: Full=Chlorophyll a-b binding protein type 2 member 1B, chloroplastic; AltName: Full=Chlorophyll a-b binding protein type II 1B; Short=CAB; AltName: Full=LHCP; Flags: Precursor [Pinus sylvestris]
F02_cb15380_c1/f1p0/1170	[KR]	--	--	--	--	--	--	--	Acetyltransferase NSI GN=NSI OS=Arabidopsis thaliana (Mouse-ear cress) PE=1 SV=1	S	Function unknown	hypothetical protein MIMGU_mgv1a012601mg [Erythranthe guttata]
F02_cb16713_c344/f65p8/666	--	--	Cellular Component: chloroplast thylakoid membrane (GO:0009535);; Cellular Component: photosystem II oxygen evolving complex (GO:0009654);; Biological Process: photosynthesis (GO:0015979);;	K03541|2.99896e-52|gmx:100499745|uncharacterized LOC100499745; K03541 photosystem II 10kDa protein (A)	ko00195:Photosynthesis	--	--	Photosystem II 10 kDa polypeptide PsbR	Photosystem II 10 kDa polypeptide, chloroplastic (Precursor) GN=PSBR OS=Solanum tuberosum (Potato) PE=2 SV=1	S	Function unknown	uncharacterized protein LOC100499745 [Glycine max]
F02_cb8750_c2/f1p0/1806	[GEPR]	--	--	--	--	[R]	General function prediction only	Sugar (and other) transporter;; Major Facilitator Superfamily	Organic cation/carnitine transporter 3 GN=F3O9.19 OS=Arabidopsis thaliana (Mouse-ear cress) PE=2 SV=1	G	Carbohydrate transport and metabolism	hypothetical protein MIMGU_mgv1a018738mg, partial [Erythranthe guttata]
F02_cb3132_c1/f1p0/2438	[RTKL]	--	--	--	--	[T]	Signal transduction mechanisms	Protein tyrosine kinase;; Protein kinase domain;; PAS domain;; PAS fold;; PAS fold;; PAS domain;; Protein tyrosine kinase;; Protein kinase domain	Serine/threonine-protein kinase CTR1 GN=CTR1 OS=Arabidopsis thaliana (Mouse-ear cress) PE=1 SV=1	T	Signal transduction mechanisms	PREDICTED: serine/threonine-protein kinase EDR1-like isoform X1 [Nelumbo nucifera]
F02_cb1758_c11/f1p0/2479	[P]	Inorganic ion transport and metabolism	--	--	--	[P]	Inorganic ion transport and metabolism	Sodium/hydrogen exchanger family	K(+) efflux antiporter 4 GN=KEA4 OS=Arabidopsis thaliana (Mouse-ear cress) PE=2 SV=2	P	Inorganic ion transport and metabolism	hypothetical protein MIMGU_mgv1a003437mg [Erythranthe guttata]
F01_cb8935_c0/f1p0/2218	--	--	Cellular Component: mitochondrial inner membrane (GO:0005743);; Biological Process: mitochondrial transport (GO:0006839);; Cellular Component: integral component of membrane (GO:0016021);; Biological Process: transmembrane transport (GO:0055085);;	K15121|4.64371e-93|csv:101213375|solute carrier family 25 member 44-like; K15121 solute carrier family 25, member 44 (A)	--	[C]	Energy production and conversion	Mitochondrial carrier protein	Protein MITOFERRINLIKE 1, chloroplastic (Precursor) GN=MFL1 OS=Arabidopsis thaliana (Mouse-ear cress) PE=2 SV=1	S	Function unknown	PREDICTED: solute carrier family 25 member 44-like [Sesamum indicum]
F02_cb6743_c16/f1p0/3178	--	--	--	K03023|1.86367e-142|sot:102597386|DNA-directed RNA polymerase III subunit rpc3-like; K03023 DNA-directed RNA polymerase III subunit RPC3 (A)	ko00230:Purine metabolism;ko00240:Pyrimidine metabolism;ko03020:RNA polymerase	[K]	Transcription	RNA polymerase III subunit RPC82;; RNA polymerase III subunit RPC82 helix-turn-helix domain	--	K	Transcription	PREDICTED: DNA-directed RNA polymerase III subunit rpc3 isoform X2 [Sesamum indicum]
F02_cb7367_c9/f1p2/2636	[KAD]	--	Molecular Function: binding (GO:0005488);;	K09422|0|sot:102593320|myb-related protein A-like; K09422 myb proto-oncogene protein, plant (A)	--	[K]	Transcription	Myb-like DNA-binding domain;; Myb-like DNA-binding domain	Transcription factor WER GN=T9L3.50 OS=Arabidopsis thaliana (Mouse-ear cress) PE=1 SV=1	K	Transcription	MYB-related transcription factor [Salvia miltiorrhiza]
F01_cb5444_c2/f1p0/2460	--	--	Biological Process: intracellular protein transport (GO:0006886);; Biological Process: vacuolar transport (GO:0007034);; Cellular Component: retromer complex (GO:0030904);; Biological Process: retrograde transport, endosome to Golgi (GO:0042147);; Biological Process: photoperiodism, flowering (GO:0048573);;	--	--	[R]	General function prediction only	Vacuolar protein sorting-associated protein 26	--	S	Function unknown	PREDICTED: Down syndrome critical region protein 3 homolog isoform X1 [Sesamum indicum]
F01_cb3465_c8/f1p0/1741	[G]	Carbohydrate transport and metabolism	--	K05349|3.59637e-91|pper:PRUPE_ppa003012mg|hypothetical protein; K05349 beta-glucosidase [EC:3.2.1.21] (A)	ko00460:Cyanoamino acid metabolism;ko00500:Starch and sucrose metabolism;ko00940:Phenylpropanoid biosynthesis	--	--	Glycosyl hydrolase family 3 N terminal domain;; Glycosyl hydrolase family 3 N terminal domain	--	G	Carbohydrate transport and metabolism	unnamed protein product [Coffea canephora]
F02_cb17636_c4/f1p0/577	--	--	--	K10881|4.08357e-07|tcc:TCM_012039|Deletion of SUV3 suppressor 1(I) isoform 1; K10881 26 proteasome complex subunit DSS1 (A)	ko03050:Proteasome;ko03440:Homologous recombination	--	--	DSS1/SEM1 family	--	--	--	PREDICTED: probable 26S proteasome complex subunit sem1-1 [Sesamum indicum]
F02_cb15589_c4/f1p0/1094	--	--	Biological Process: intracellular protein transport (GO:0006886);;	K15296|1.44258e-132|gmx:100812517|alpha-soluble NSF attachment protein 2-like; K15296 alpha-soluble NSF attachment protein (A)	--	[U]	Intracellular trafficking, secretion, and vesicular transport	Soluble NSF attachment protein, SNAP;; Tetratricopeptide repeat;; Tetratricopeptide repeat	Alpha-soluble NSF attachment protein OS=Vitis vinifera (Grape) PE=2 SV=1	U	Intracellular trafficking, secretion, and vesicular transport	hypothetical protein MIMGU_mgv1a011203mg [Erythranthe guttata]
F01_cb401_c14/f1p0/5137	[P]	Inorganic ion transport and metabolism	Biological Process: defense response (GO:0006952);; Biological Process: signal transduction (GO:0007165);; Biological Process: response to hormone (GO:0009725);; Biological Process: single-organism transport (GO:0044765);; Biological Process: cellular response to organic substance (GO:0071310);;	K14513|0|sly:543928|EIN2, LeEIN2; ethylene signaling protein; K14513 ethylene-insensitive protein 2 (A)	ko04075:Plant hormone signal transduction	[P]	Inorganic ion transport and metabolism	Natural resistance-associated macrophage protein	Ethylene-insensitive protein 2 GN=F12E4.10 OS=Arabidopsis thaliana (Mouse-ear cress) PE=1 SV=1	P	Inorganic ion transport and metabolism	PREDICTED: ethylene-insensitive protein 2-like [Sesamum indicum]
F02_cb11041_c51398/f1p3/3700	[M]	Cell wall/membrane/envelope biogenesis	--	K10999|0|pper:PRUPE_ppa000611mg|hypothetical protein; K10999 cellulose synthase A [EC:2.4.1.12] (A)	--	--	--	Cellulose synthase;; Glycosyl transferase family group 2;; Cellulose synthase;; Zinc-binding RING-finger;; RING/Ubox like zinc-binding domain	Probable cellulose synthase A catalytic subunit 1 [UDP-forming] OS=Oryza sativa subsp. japonica (Rice) PE=2 SV=1	M	Cell wall/membrane/envelope biogenesis	PREDICTED: cellulose synthase A catalytic subunit 1 [UDP-forming] [Sesamum indicum]
F02_cb11041_c4998/f1p0/2397	--	--	Molecular Function: nucleotide binding (GO:0000166);; Molecular Function: protein kinase activity (GO:0004672);; Cellular Component: membrane (GO:0016020);; Biological Process: phosphorylation (GO:0016310);; Biological Process: single-organism process (GO:0044699);; Biological Process: regulation of biological process (GO:0050789);;	--	--	--	--	Leucine Rich repeats (2 copies);; Leucine Rich Repeat;; Leucine rich repeat;; Leucine Rich repeat;; Leucine rich repeat;; Protein tyrosine kinase;; Leucine Rich repeats (2 copies);; Leucine rich repeat;; Leucine Rich Repeat;; Leucine Rich repeat;; Leucine rich repeat N-terminal domain;; Protein tyrosine kinase	Receptor-like protein kinase 2 (Precursor) GN=RCH2 OS=Arabidopsis thaliana (Mouse-ear cress) PE=1 SV=1	S	Function unknown	PREDICTED: leucine-rich repeat receptor-like protein kinase TDR [Sesamum indicum]
F02_cb2674_c7/f1p1/1973	[Q]	Secondary metabolites biosynthesis, transport and catabolism	Molecular Function: monooxygenase activity (GO:0004497);; Molecular Function: iron ion binding (GO:0005506);; Molecular Function: electron carrier activity (GO:0009055);; Molecular Function: oxidoreductase activity, acting on paired donors, with incorporation or reduction of molecular oxygen (GO:0016705);; Molecular Function: heme binding (GO:0020037);; Biological Process: oxidation-reduction pro…	--	--	[Q]	Secondary metabolites biosynthesis, transport and catabolism	Cytochrome P450;; Cytochrome P450	Flavonoid 3&apos;-monooxygenase GN=F13G24.190 OS=Arabidopsis thaliana (Mouse-ear cress) PE=1 SV=1	Q	Secondary metabolites biosynthesis, transport and catabolism	PREDICTED: cytochrome P450 71A1-like [Sesamum indicum]
F02_cb6965_c3/f1p0/2448	[S]	Function unknown	Biological Process: transmembrane transport (GO:0055085);;	--	--	--	--	OPT oligopeptide transporter protein	Metal-nicotianamine transporter YSL3 GN=YSL3 OS=Arabidopsis thaliana (Mouse-ear cress) PE=2 SV=1	S	Function unknown	PREDICTED: metal-nicotianamine transporter YSL1-like isoform X2 [Sesamum indicum]
F01_cb2642_c33/f1p0/2206	[GO]	--	--	K01510|0|sly:101268182|probable apyrase 6; K01510 apyrase [EC:3.6.1.5] (A)	ko00230:Purine metabolism;ko00240:Pyrimidine metabolism	[F]	Nucleotide transport and metabolism	GDA1/CD39 (nucleoside phosphatase) family	Probable apyrase 6 GN=APY6 OS=Arabidopsis thaliana (Mouse-ear cress) PE=2 SV=2	GO	--	PREDICTED: probable apyrase 6 [Sesamum indicum]
F01_cb1359_c7/f1p0/2253	[GC]	--	Molecular Function: transferase activity, transferring glycosyl groups (GO:0016757);; Biological Process: primary metabolic process (GO:0044238);; Biological Process: organic substance metabolic process (GO:0071704);;	K05841|1.39101e-148|sly:101266021|sterol 3-beta-glucosyltransferase UGT80A2-like; K05841 sterol 3beta-glucosyltransferase [EC:2.4.1.173] (A)	--	[GC]	--	UDP-glucoronosyl and UDP-glucosyl transferase;; Glycosyltransferase family 28 N-terminal domain;; Glycosyltransferase family 28 N-terminal domain	Sterol 3-beta-glucosyltransferase UGT80B1 GN=T10P12.7 OS=Arabidopsis thaliana (Mouse-ear cress) PE=2 SV=1	S	Function unknown	PREDICTED: sterol 3-beta-glucosyltransferase UGT80A2-like [Solanum lycopersicum]
F02_cb2216_c13/f1p0/2624	--	--	Biological Process: transcription, DNA-templated (GO:0006351);; Biological Process: embryo development (GO:0009790);; Biological Process: seed maturation (GO:0010431);; Biological Process: single-organism cellular process (GO:0044763);; Biological Process: shoot system development (GO:0048367);; Biological Process: regulation of developmental process (GO:0050793);; Biological Process: regulation …	--	--	--	--	B3 DNA binding domain;; CW-type Zinc Finger	B3 domain-containing transcription repressor VAL2 GN=F10N7.180 OS=Arabidopsis thaliana (Mouse-ear cress) PE=2 SV=1	K	Transcription	PREDICTED: B3 domain-containing transcription repressor VAL2 [Sesamum indicum]
F01_cb7378_c14/f1p0/1997	[P]	Inorganic ion transport and metabolism	Biological Process: calcium ion transport (GO:0006816);; Molecular Function: calcium:proton antiporter activity (GO:0015369);; Cellular Component: integral component of membrane (GO:0016021);; Biological Process: transmembrane transport (GO:0055085);;	K07300|9.6449e-102|sot:102582937|vacuolar cation/proton exchanger 3-like; K07300 Ca2+:H+ antiporter (A)	--	[P]	Inorganic ion transport and metabolism	Sodium/calcium exchanger protein	Vacuolar cation/proton exchanger 3 GN=CAX3 OS=Arabidopsis thaliana (Mouse-ear cress) PE=1 SV=1	P	Inorganic ion transport and metabolism	PREDICTED: vacuolar cation/proton exchanger 3-like [Sesamum indicum]
F01_cb4126_c12/f1p1/2571	--	--	Molecular Function: catalytic activity (GO:0003824);; Biological Process: metabolic process (GO:0008152);;	--	--	--	--	Peptidase family S64	--	S	Function unknown	PREDICTED: uncharacterized protein LOC105175063 [Sesamum indicum]
F01_cb6178_c2/f4p1/1849	--	--	--	--	--	[S]	Function unknown	Ion channel regulatory protein UNC-93	UNC93-like protein 3 GN=At3g09470 OS=Arabidopsis thaliana (Mouse-ear cress) PE=2 SV=1	S	Function unknown	PREDICTED: UNC93-like protein 3 [Sesamum indicum]
F01_cb12843_c7/f1p0/1180	--	--	Biological Process: protein transport (GO:0015031);;	K12194|1.31298e-79|csv:101221920|vacuolar protein sorting-associated protein 32 homolog 2-like; K12194 charged multivesicular body protein 4 (A)	ko04144:Endocytosis	[U]	Intracellular trafficking, secretion, and vesicular transport	Snf7	Vacuolar protein sorting-associated protein 32 homolog 2 GN=At4g29160 OS=Arabidopsis thaliana (Mouse-ear cress) PE=1 SV=1	U	Intracellular trafficking, secretion, and vesicular transport	PREDICTED: vacuolar protein sorting-associated protein 32 homolog 2-like [Cucumis sativus]
F02_cb6516_c0/f1p0/2520	--	--	--	K10457|0|vvi:100267149|ring canal kelch homolog; K10457 kelch-like protein 20 (A)	--	[R]	General function prediction only	Kelch motif;; Kelch motif;; Kelch motif;; Galactose oxidase, central domain;; Galactose oxidase, central domain;; Kelch motif;; Development and cell death domain	B2 protein OS=Daucus carota (Wild carrot) PE=2 SV=1	S	Function unknown	PREDICTED: kelch-like protein 1 isoform X1 [Sesamum indicum]
F01_cb16481_c3/f1p0/728	--	--	Molecular Function: structural constituent of ribosome (GO:0003735);; Cellular Component: nucleolus (GO:0005730);; Cellular Component: plasma membrane (GO:0005886);; Biological Process: translation (GO:0006412);; Cellular Component: cytosolic large ribosomal subunit (GO:0022625);;	K02891|2.69166e-54|pop:POPTR_0014s12340g|60S ribosomal protein L22-1; K02891 large subunit ribosomal protein L22e (A)	ko03010:Ribosome	[J]	Translation, ribosomal structure and biogenesis	Ribosomal L22e protein family	60S ribosomal protein L22-2 GN=RPL22B OS=Arabidopsis thaliana (Mouse-ear cress) PE=2 SV=1	J	Translation, ribosomal structure and biogenesis	PREDICTED: 60S ribosomal protein L22-2 [Sesamum indicum]
F01_cb10261_c4/f1p0/2419	[J]	Translation, ribosomal structure and biogenesis	Biological Process: RNA methylation (GO:0001510);; Molecular Function: RNA binding (GO:0003723);; Biological Process: RNA processing (GO:0006396);; Molecular Function: RNA methyltransferase activity (GO:0008173);;	--	--	[J]	Translation, ribosomal structure and biogenesis	tRNA (Uracil-5-)-methyltransferase;; Methyltransferase domain;; Methyltransferase domain;; Methyltransferase domain;; Methyltransferase small domain;; Methyltransferase domain;; RNA cap guanine-N2 methyltransferase;; Met-10+ like-protein;; Ribosomal protein L11 methyltransferase (PrmA)	Zinc finger CCCH domain-containing protein 24 GN=At2g28450 OS=Arabidopsis thaliana (Mouse-ear cress) PE=1 SV=1	J	Translation, ribosomal structure and biogenesis	PREDICTED: tRNA (uracil-5-)-methyltransferase homolog A [Sesamum indicum]
F01_cb6152_c2/f1p2/2320	--	--	Molecular Function: peptidase activity (GO:0008233);;	--	--	--	--	--	Subtilisin-like protease (Precursor) GN=At5g67360 OS=Arabidopsis thaliana (Mouse-ear cress) PE=1 SV=1	O	Posttranslational modification, protein turnover, chaperones	hypothetical protein MIMGU_mgv1a001789mg [Erythranthe guttata]
F01_cb10308_c2/f1p0/1997	--	--	--	--	--	[R]	General function prediction only	PPR repeat family;; Pentatricopeptide repeat domain;; PPR repeat;; PPR repeat;; Tetratricopeptide repeat	Pentatricopeptide repeat-containing protein At1g77360, mitochondrial (Precursor) GN=At1g77360 OS=Arabidopsis thaliana (Mouse-ear cress) PE=2 SV=2	S	Function unknown	PREDICTED: pentatricopeptide repeat-containing protein At1g77360, mitochondrial-like [Sesamum indicum]
F01_cb16438_c15502/f1p0/2650	--	--	Molecular Function: transferase activity (GO:0016740);;	--	--	[GC]	--	UDP-glucoronosyl and UDP-glucosyl transferase	UDP-glycosyltransferase 74E2 GN=UGT74E2 OS=Arabidopsis thaliana (Mouse-ear cress) PE=1 SV=1	S	Function unknown	hypothetical protein MIMGU_mgv1a006023mg [Erythranthe guttata]
F02_cb1606_c72/f1p0/3632	--	--	--	--	--	[T]	Signal transduction mechanisms	NB-ARC domain;; Leucine rich repeat;; Leucine Rich repeats (2 copies);; AAA domain;; Leucine Rich Repeat	Putative disease resistance protein RGA4 GN=RGA4 OS=Solanum bulbocastanum (Wild potato) PE=2 SV=1	S	Function unknown	hypothetical protein MIMGU_mgv1a019163mg [Erythranthe guttata]
F01_cb7880_c8/f1p0/2099	--	--	--	--	--	--	--	--	--	S	Function unknown	PREDICTED: uncharacterized protein LOC105160776 [Sesamum indicum]
F01_cb6052_c44/f1p0/1501	--	--	Molecular Function: nucleotide binding (GO:0000166);; Molecular Function: RNA binding (GO:0003723);; Cellular Component: nucleus (GO:0005634);; Molecular Function: metal ion binding (GO:0046872);;	K12836|7.47452e-78|mus:103972460|splicing factor U2af small subunit B-like; K12836 splicing factor U2AF 35 kDa subunit (A)	ko03040:Spliceosome	[A]	RNA processing and modification	Zinc finger C-x8-C-x5-C-x3-H type (and similar);; Zinc finger C-x8-C-x5-C-x3-H type (and similar)	Splicing factor U2af small subunit A GN=OsJ_028686 OS=Oryza sativa subsp. japonica (Rice) PE=2 SV=1	S	Function unknown	PREDICTED: splicing factor U2af small subunit B-like [Sesamum indicum]
F01_cb11083_c36/f1p0/2557	[GEPR]	--	Cellular Component: Golgi apparatus (GO:0005794);; Cellular Component: integral component of plasma membrane (GO:0005887);; Molecular Function: sucrose:proton symporter activity (GO:0008506);; Biological Process: response to fungus (GO:0009620);; Biological Process: jasmonic acid biosynthetic process (GO:0009695);; Biological Process: response to jasmonic acid (GO:0009753);; Biological Process: r…	K15378|0|sly:543613|SUT2; sucrose transporter-like protein; K15378 solute carrier family 45, member 1/2/4 (A)	--	[G]	Carbohydrate transport and metabolism	Major Facilitator Superfamily;; MFS/sugar transport protein;; PUCC protein	Sucrose transport protein SUC3 GN=T17M13.3 OS=Arabidopsis thaliana (Mouse-ear cress) PE=1 SV=1	U	Intracellular trafficking, secretion, and vesicular transport	PREDICTED: sucrose transport protein SUC3 isoform X1 [Sesamum indicum]
F01_cb16958_c14/f1p0/1264	[G]	Carbohydrate transport and metabolism	Molecular Function: ribokinase activity (GO:0004747);; Molecular Function: ATP binding (GO:0005524);; Biological Process: D-ribose metabolic process (GO:0006014);; Molecular Function: fructokinase activity (GO:0008865);; Biological Process: phosphorylation (GO:0016310);; Biological Process: starch biosynthetic process (GO:0019252);;	K00847|0|vvi:100245852|fructokinase-2-like; K00847 fructokinase [EC:2.7.1.4] (A)	ko00051:Fructose and mannose metabolism;ko00500:Starch and sucrose metabolism;ko00520:Amino sugar and nucleotide sugar metabolism	[G]	Carbohydrate transport and metabolism	pfkB family carbohydrate kinase	Fructokinase-2 GN=FRK2 OS=Solanum habrochaites (Wild tomato) PE=2 SV=1	G	Carbohydrate transport and metabolism	hypothetical protein MIMGU_mgv1a010047mg [Erythranthe guttata]
F02_cb4153_c2/f1p0/2170	--	--	--	--	--	[R]	General function prediction only	PPR repeat;; PPR repeat family;; Pentatricopeptide repeat domain;; PPR repeat;; DYW family of nucleic acid deaminases;; Tetratricopeptide repeat;; Tetratricopeptide repeat	Pentatricopeptide repeat-containing protein At5g44230 GN=PCMP-H17 OS=Arabidopsis thaliana (Mouse-ear cress) PE=2 SV=1	S	Function unknown	PREDICTED: pentatricopeptide repeat-containing protein At5g44230 [Sesamum indicum]
F02_cb2822_c3/f1p0/1344	--	--	Molecular Function: iron ion binding (GO:0005506);; Molecular Function: electron carrier activity (GO:0009055);; Molecular Function: oxidoreductase activity, acting on paired donors, with incorporation or reduction of molecular oxygen (GO:0016705);; Molecular Function: oxygen binding (GO:0019825);; Molecular Function: heme binding (GO:0020037);; Biological Process: oxidation-reduction process (GO…	K17964|2.24847e-39|fve:101291228|pentatricopeptide repeat-containing protein At5g57250, mitochondrial-like; K17964 leucine-rich PPR motif-containing protein, mitochondrial (A)	--	[R]	General function prediction only	PPR repeat;; PPR repeat family;; PPR repeat	Pentatricopeptide repeat-containing protein At5g57250, mitochondrial (Precursor) GN=At5g57250 OS=Arabidopsis thaliana (Mouse-ear cress) PE=2 SV=2	S	Function unknown	PREDICTED: pentatricopeptide repeat-containing protein At5g57250, mitochondrial [Sesamum indicum]
F02_cb16708_c5/f5p0/883	[S]	Function unknown	--	--	--	[S]	Function unknown	Uncharacterised protein family UPF0047;; Uncharacterised protein family UPF0047	--	S	Function unknown	hypothetical protein MIMGU_mgv1a014010mg [Erythranthe guttata]
F01_cb16438_c1713/f1p0/1972	--	--	Biological Process: cell wall biogenesis (GO:0042546);; Biological Process: cell wall macromolecule metabolic process (GO:0044036);;	--	--	[S]	Function unknown	Rgp1	--	U	Intracellular trafficking, secretion, and vesicular transport	PREDICTED: uncharacterized protein LOC101248637 isoform X2 [Solanum lycopersicum]
F02_cb9008_c13/f2p0/3315	--	--	--	--	--	--	--	--	--	S	Function unknown	PREDICTED: uncharacterized protein LOC105161979 [Sesamum indicum]
F01_cb13878_c3/f1p0/1336	--	--	--	--	--	[O]	Posttranslational modification, protein turnover, chaperones	Ring finger domain;; Zinc finger, C3HC4 type (RING finger);; Zinc finger, C3HC4 type (RING finger);; RING-H2 zinc finger;; Zinc finger, C3HC4 type (RING finger);; zinc-RING finger domain	E3 ubiquitin ligase BIG BROTHER GN=BB OS=Arabidopsis thaliana (Mouse-ear cress) PE=1 SV=1	O	Posttranslational modification, protein turnover, chaperones	PREDICTED: E3 ubiquitin ligase BIG BROTHER-like isoform X2 [Sesamum indicum]
F01_cb19682_c633/f1p2/653	--	--	--	--	--	--	--	Dormancy/auxin associated protein	Auxin-repressed 12.5 kDa protein OS=Fragaria ananassa (Strawberry) PE=2 SV=1	S	Function unknown	hypothetical protein MIMGU_mgv1a016425mg [Erythranthe guttata]
F01_cb6853_c9/f1p1/2409	--	--	Cellular Component: chloroplast thylakoid lumen (GO:0009543);;	--	--	[R]	General function prediction only	Armadillo/beta-catenin-like repeat;; HEAT repeats;; HEAT repeat;; HEAT-like repeat;; Proteasome non-ATPase 26S subunit;; Vacuolar 14 Fab1-binding region	--	S	Function unknown	PREDICTED: armadillo repeat-containing protein 8 isoform X2 [Sesamum indicum]
F01_cb16438_c32419/f2p0/2069	--	--	--	--	--	--	--	F-box domain	Putative F-box/LRR-repeat protein At3g18150 GN=At3g18150 OS=Arabidopsis thaliana (Mouse-ear cress) PE=3 SV=2	--	--	hypothetical protein MIMGU_mgv1a019102mg, partial [Erythranthe guttata]
F01_cb6012_c5/f1p0/1333	--	--	--	--	--	--	--	--	--	S	Function unknown	PREDICTED: uncharacterized protein LOC105167885 [Sesamum indicum]
F02_cb11041_c4407/f3p3/2205	--	--	Molecular Function: transferase activity (GO:0016740);;	--	--	[GC]	--	--	UDP-glycosyltransferase 85A7 GN=UGT85A7 OS=Arabidopsis thaliana (Mouse-ear cress) PE=2 SV=1	S	Function unknown	PREDICTED: 7-deoxyloganetic acid glucosyltransferase-like [Sesamum indicum]
F01_cb7790_c28/f1p2/2074	--	--	--	--	--	--	--	Protein of unknown function (DUF793);; Protein of unknown function (DUF793)	--	S	Function unknown	PREDICTED: uncharacterized protein LOC105179443 [Sesamum indicum]
F01_cb1984_c16/f1p1/2923	[RTKL]	--	--	--	--	[T]	Signal transduction mechanisms	Carbohydrate-binding protein of the ER;; Protein tyrosine kinase;; Protein kinase domain;; Di-glucose binding within endoplasmic reticulum	Receptor-like protein kinase FERONIA (Precursor) GN=F26O13.190 OS=Arabidopsis thaliana (Mouse-ear cress) PE=1 SV=1	T	Signal transduction mechanisms	PREDICTED: receptor-like protein kinase FERONIA [Sesamum indicum]
F02_cb3493_c5/f1p0/522	--	--	Molecular Function: sequence-specific DNA binding transcription factor activity (GO:0003700);; Cellular Component: nucleus (GO:0005634);; Cellular Component: cytosol (GO:0005829);; Biological Process: regulation of transcription, DNA-templated (GO:0006355);; Biological Process: response to light stimulus (GO:0009416);; Biological Process: detection of cytokinin stimulus (GO:0009722);; Molecular F…	--	--	[K]	Transcription	Homeobox KN domain;; Homeobox domain	Homeobox protein knotted-1-like 3 GN=KNAT3 OS=Arabidopsis thaliana (Mouse-ear cress) PE=1 SV=1	K	Transcription	PREDICTED: homeobox protein knotted-1-like 13 isoform X2 [Brachypodium distachyon]
F02_cb12179_c1/f1p0/2326	--	--	--	--	--	--	--	picornavirus capsid protein;; CRPV capsid protein like	--	--	--	--
F02_cb13573_c0/f1p0/1356	--	--	--	--	--	--	--	--	--	S	Function unknown	hypothetical protein OsJ_15967 [Oryza sativa Japonica Group]
F02_cb3536_c1/f1p0/1578	[G]	Carbohydrate transport and metabolism	Molecular Function: glycerone kinase activity (GO:0004371);; Molecular Function: ATP binding (GO:0005524);; Biological Process: glycerol metabolic process (GO:0006071);; Biological Process: phosphorylation (GO:0016310);;	K00863|2.54491e-132|cit:102609834|putative 3,4-dihydroxy-2-butanone kinase-like; K00863 dihydroxyacetone kinase [EC:2.7.1.29] (A)	ko00561:Glycerolipid metabolism;ko01200:Carbon metabolism	[G]	Carbohydrate transport and metabolism	Dak1 domain;; DAK2 domain	Putative 3,4-dihydroxy-2-butanone kinase GN=DHBK OS=Solanum lycopersicum (Tomato) PE=2 SV=1	G	Carbohydrate transport and metabolism	PREDICTED: putative 3,4-dihydroxy-2-butanone kinase [Sesamum indicum]
F02_cb953_c7/f1p0/3193	--	--	--	--	--	--	--	--	Probable V-type proton ATPase subunit d OS=Oryza sativa subsp. japonica (Rice) PE=2 SV=1	S	Function unknown	hypothetical protein MIMGU_mgv1a000389mg [Erythranthe guttata]
F02_cb555_c6/f1p0/1813	[R]	General function prediction only	Molecular Function: organic cyclic compound binding (GO:0097159);; Molecular Function: heterocyclic compound binding (GO:1901363);;	K12741|2.0535e-115|sly:101255522|UBP1-associated protein 2A; K12741 heterogeneous nuclear ribonucleoprotein A1/A3 (A)	ko03040:Spliceosome	[R]	General function prediction only	RNA recognition motif. (a.k.a. RRM, RBD, or RNP domain);; RNA recognition motif (a.k.a. RRM, RBD, or RNP domain);; RNA recognition motif. (a.k.a. RRM, RBD, or RNP domain);; Nup53/35/40-type RNA recognition motif	UBP1-associated protein 2A GN=UBA2A OS=Arabidopsis thaliana (Mouse-ear cress) PE=1 SV=1	S	Function unknown	PREDICTED: UBP1-associated protein 2A-like [Sesamum indicum]
F02_cb333_c17/f1p0/5113	--	--	Biological Process: cellular metabolic process (GO:0044237);; Biological Process: primary metabolic process (GO:0044238);; Biological Process: organic substance metabolic process (GO:0071704);;	K00921|0|sot:102598631|putative 1-phosphatidylinositol-3-phosphate 5-kinase FAB1D-like; K00921 1-phosphatidylinositol-3-phosphate 5-kinase [EC:2.7.1.150] (A)	ko00562:Inositol phosphate metabolism;ko04070:Phosphatidylinositol signaling system;ko04145:Phagosome	[T]	Signal transduction mechanisms	Phosphatidylinositol-4-phosphate 5-Kinase;; TCP-1/cpn60 chaperonin family	Putative 1-phosphatidylinositol-3-phosphate 5-kinase FAB1D GN=FAB1D OS=Arabidopsis thaliana (Mouse-ear cress) PE=3 SV=1	O	Posttranslational modification, protein turnover, chaperones	PREDICTED: putative 1-phosphatidylinositol-3-phosphate 5-kinase FAB1D [Sesamum indicum]
F01_cb19682_c1922/f2p1/557	--	--	--	--	--	--	--	--	Probable non-specific lipid-transfer protein AKCS9 (Precursor) OS=Vigna unguiculata (Cowpea) PE=2 SV=1	U	Intracellular trafficking, secretion, and vesicular transport	PREDICTED: non-specific lipid-transfer protein 2-like [Sesamum indicum]
F02_cb6642_c23/f1p0/3257	--	--	Biological Process: metabolic process (GO:0008152);; Molecular Function: nucleotidyltransferase activity (GO:0016779);;	K00972|0|pmum:103325488|UDP-N-acetylglucosamine diphosphorylase 1; K00972 UDP-N-acetylglucosamine/UDP-N-acetylgalactosamine diphosphorylase [EC:2.7.7.23 2.7.7.83] (A)	ko00520:Amino sugar and nucleotide sugar metabolism	[M]	Cell wall/membrane/envelope biogenesis	UTP--glucose-1-phosphate uridylyltransferase	UDP-N-acetylglucosamine diphosphorylase 1 GN=GLCNAC1PUT1 OS=Arabidopsis thaliana (Mouse-ear cress) PE=1 SV=1	G	Carbohydrate transport and metabolism	PREDICTED: UDP-N-acetylglucosamine diphosphorylase 1 isoform X2 [Sesamum indicum]
F01_cb13343_c20/f1p0/1155	--	--	--	--	--	[R]	General function prediction only	C2H2-type zinc finger	Zinc finger protein ZAT10 GN=T22C5.18 OS=Arabidopsis thaliana (Mouse-ear cress) PE=2 SV=1	S	Function unknown	PREDICTED: zinc finger protein ZAT10-like [Sesamum indicum]
F01_cb9481_c6/f1p0/1853	[Q]	Secondary metabolites biosynthesis, transport and catabolism	Molecular Function: copper ion binding (GO:0005507);; Molecular Function: L-ascorbate oxidase activity (GO:0008447);; Biological Process: plant-type secondary cell wall biogenesis (GO:0009834);; Biological Process: lignin catabolic process (GO:0046274);; Cellular Component: apoplast (GO:0048046);; Molecular Function: hydroquinone:oxygen oxidoreductase activity (GO:0052716);; Biological Process: o…	--	--	[Q]	Secondary metabolites biosynthesis, transport and catabolism	Multicopper oxidase;; Multicopper oxidase;; Multicopper oxidase	Laccase-4 (Precursor) GN=F16M14.1 OS=Arabidopsis thaliana (Mouse-ear cress) PE=2 SV=2	Q	Secondary metabolites biosynthesis, transport and catabolism	PREDICTED: laccase-4-like [Sesamum indicum]
F02_cb7471_c9/f1p0/1762	--	--	Molecular Function: adenosylmethionine decarboxylase activity (GO:0004014);; Biological Process: S-adenosylmethioninamine biosynthetic process (GO:0006557);; Biological Process: spermine biosynthetic process (GO:0006597);; Biological Process: spermidine biosynthetic process (GO:0008295);;	K01611|0|sly:101260400|S-adenosylmethionine decarboxylase proenzyme; K01611 S-adenosylmethionine decarboxylase [EC:4.1.1.50] (A)	ko00270:Cysteine and methionine metabolism;ko00330:Arginine and proline metabolism	[T]	Signal transduction mechanisms	Adenosylmethionine decarboxylase;; S-adenosyl-l-methionine decarboxylase leader peptide	S-adenosylmethionine decarboxylase beta chain (Precursor) GN=SAMDC OS=Ipomoea nil (Japanese morning glory) PE=3 SV=1	E	Amino acid transport and metabolism	PREDICTED: S-adenosylmethionine decarboxylase proenzyme-like [Sesamum indicum]
F01_cb16438_c564/f4p0/1723	--	--	Molecular Function: carboxypeptidase activity (GO:0004180);; Biological Process: proteolysis (GO:0006508);; Molecular Function: serine-type peptidase activity (GO:0008236);;	K01285|0|sot:102578651|lysosomal Pro-X carboxypeptidase-like; K01285 lysosomal Pro-X carboxypeptidase [EC:3.4.16.2] (A)	--	[OR]	--	Serine carboxypeptidase S28	Probable serine protease EDA2 (Precursor) GN=EDA2 OS=Arabidopsis thaliana (Mouse-ear cress) PE=2 SV=2	S	Function unknown	PREDICTED: lysosomal Pro-X carboxypeptidase-like [Sesamum indicum]
F01_cb4107_c9/f1p2/2599	--	--	--	--	--	--	--	HAUS augmin-like complex subunit 5;; HAUS augmin-like complex subunit 5;; HAUS augmin-like complex subunit 5	--	S	Function unknown	hypothetical protein MIMGU_mgv1a001653mg [Erythranthe guttata]
F01_cb8206_c17/f1p0/2178	[R]	General function prediction only	Molecular Function: adenyl nucleotide binding (GO:0030554);;	--	--	--	--	CBS domain;; CBS domain	CBS domain-containing protein CBSCBSPB3 GN=CBSCBSPB3 OS=Arabidopsis thaliana (Mouse-ear cress) PE=1 SV=1	S	Function unknown	PREDICTED: CBS domain-containing protein CBSCBSPB3 [Sesamum indicum]
F01_cb13170_c5/f1p0/1025	--	--	--	--	--	[O]	Posttranslational modification, protein turnover, chaperones	CS domain	Uncharacterized protein OsI_027940 OS=Oryza sativa subsp. indica (Rice) PE=1 SV=2	S	Function unknown	PREDICTED: uncharacterized protein OsI_027940-like [Sesamum indicum]
F01_cb6232_c11/f1p0/2533	[G]	Carbohydrate transport and metabolism	Molecular Function: 6-phosphofructo-2-kinase activity (GO:0003873);; Molecular Function: fructose-2,6-bisphosphate 2-phosphatase activity (GO:0004331);; Molecular Function: ATP binding (GO:0005524);; Cellular Component: cytosol (GO:0005829);; Cellular Component: plasma membrane (GO:0005886);; Biological Process: fructose metabolic process (GO:0006000);; Biological Process: fructose 6-phosphate me…	K01103|0|vvi:100244966|6-phosphofructo-2-kinase/fructose-2,6-bisphosphatase; K01103 6-phosphofructo-2-kinase / fructose-2,6-biphosphatase 3&#160; [EC:2.7.1.105 3.1.3.46] (A)	ko00051:Fructose and mannose metabolism	[G]	Carbohydrate transport and metabolism	6-phosphofructo-2-kinase;; Starch binding domain;; AAA domain;; Histidine phosphatase superfamily (branch 1)	Fructose-2,6-bisphosphatase GN=F10K1.19 OS=Arabidopsis thaliana (Mouse-ear cress) PE=1 SV=1	G	Carbohydrate transport and metabolism	PREDICTED: 6-phosphofructo-2-kinase/fructose-2,6-bisphosphatase [Sesamum indicum]
F02_cb16140_c0/f1p0/752	[O]	Posttranslational modification, protein turnover, chaperones	Biological Process: protein peptidyl-prolyl isomerization (GO:0000413);; Biological Process: RNA methylation (GO:0001510);; Molecular Function: peptidyl-prolyl cis-trans isomerase activity (GO:0003755);; Cellular Component: mitochondrion (GO:0005739);; Cellular Component: Golgi apparatus (GO:0005794);; Cellular Component: cytosol (GO:0005829);; Biological Process: rRNA processing (GO:0006364);; B…	K01802|4.7101e-89|tcc:TCM_026248|Rotamase cyclophilin 2; K01802 peptidylprolyl isomerase [EC:5.2.1.8] (A)	--	[O]	Posttranslational modification, protein turnover, chaperones	Cyclophilin type peptidyl-prolyl cis-trans isomerase/CLD	Peptidyl-prolyl cis-trans isomerase CYP19-3 GN=F18O21.30 OS=Arabidopsis thaliana (Mouse-ear cress) PE=2 SV=2	O	Posttranslational modification, protein turnover, chaperones	PREDICTED: peptidyl-prolyl cis-trans isomerase CYP19-3 [Sesamum indicum]
F01_cb13715_c3/f1p0/1197	[J]	Translation, ribosomal structure and biogenesis	Molecular Function: endoribonuclease activity (GO:0004521);; Cellular Component: intracellular membrane-bounded organelle (GO:0043231);; Biological Process: cellular catabolic process (GO:0044248);; Cellular Component: cytoplasmic part (GO:0044444);;	K01166|1.07521e-116|fve:101313370|ribonuclease 2-like; K01166 ribonuclease T2 [EC:3.1.27.1] (A)	--	[A]	RNA processing and modification	Ribonuclease T2 family	Ribonuclease 2 (Precursor) GN=RNS2 OS=Arabidopsis thaliana (Mouse-ear cress) PE=2 SV=1	S	Function unknown	hypothetical protein MIMGU_mgv1a011299mg [Erythranthe guttata]
F01_cb16438_c1815/f1p0/1772	[RTKL]	--	Biological Process: activation of MAPKK activity (GO:0000186);; Molecular Function: MAP kinase kinase kinase activity (GO:0004709);; Molecular Function: ATP binding (GO:0005524);;	--	--	[T]	Signal transduction mechanisms	Protein tyrosine kinase;; Protein kinase domain;; Protein kinase domain;; Protein tyrosine kinase	Serine/threonine-protein kinase CTR1 GN=CTR1 OS=Arabidopsis thaliana (Mouse-ear cress) PE=1 SV=1	T	Signal transduction mechanisms	PREDICTED: serine/threonine-protein kinase CTR1-like isoform X1 [Sesamum indicum]
F01_cb1087_c34/f1p0/2894	--	--	--	--	--	--	--	Agenet domain;; BAH domain	--	S	Function unknown	PREDICTED: uncharacterized protein LOC105161154 isoform X1 [Sesamum indicum]
F01_cb4177_c18/f1p0/2672	[RTKL]	--	Molecular Function: protein serine/threonine kinase activity (GO:0004674);; Molecular Function: ATP binding (GO:0005524);; Biological Process: protein phosphorylation (GO:0006468);;	K08819|0|sot:102590828|probable serine/threonine-protein kinase At1g54610-like; K08819 cyclin-dependent kinase 12/13 [EC:2.7.11.22 2.7.11.23] (A)	--	[D]	Cell cycle control, cell division, chromosome partitioning	Protein kinase domain;; Protein tyrosine kinase	Probable serine/threonine-protein kinase At1g54610 GN=At1g54610 OS=Arabidopsis thaliana (Mouse-ear cress) PE=1 SV=1	T	Signal transduction mechanisms	PREDICTED: probable serine/threonine-protein kinase At1g54610 isoform X1 [Sesamum indicum]
F02_cb8652_c2/f1p0/2140	--	--	--	--	--	[R]	General function prediction only	PPR repeat family;; PPR repeat;; PPR repeat;; Pentatricopeptide repeat domain;; Tetratricopeptide repeat;; Anaphase-promoting complex, cyclosome, subunit 3;; Bacterial transcriptional activator domain	Pentatricopeptide repeat-containing protein At5g27110 OS=Arabidopsis thaliana (Mouse-ear cress) PE=2 SV=2	S	Function unknown	PREDICTED: pentatricopeptide repeat-containing protein At5g27110 [Sesamum indicum]
F02_cb2318_c1/f1p0/3333	[J]	Translation, ribosomal structure and biogenesis	Molecular Function: glycine-tRNA ligase activity (GO:0004820);; Molecular Function: ATP binding (GO:0005524);; Cellular Component: cytoplasm (GO:0005737);; Biological Process: glycyl-tRNA aminoacylation (GO:0006426);;	K14164|0|vvi:100246137|glycine--tRNA ligase 2, chloroplastic/mitochondrial; K14164 glycyl-tRNA synthetase [EC:6.1.1.14] (A)	ko00970:Aminoacyl-tRNA biosynthesis	--	--	Glycyl-tRNA synthetase alpha subunit;; Glycyl-tRNA synthetase beta subunit;; Glycyl-tRNA synthetase beta subunit;; Glycyl-tRNA synthetase beta subunit;; Glycyl-tRNA synthetase beta subunit	Glycine--tRNA ligase 2, chloroplastic/mitochondrial (Precursor) GN=T17F15.20 OS=Arabidopsis thaliana (Mouse-ear cress) PE=2 SV=1	J	Translation, ribosomal structure and biogenesis	PREDICTED: glycine--tRNA ligase 2, chloroplastic/mitochondrial isoform X1 [Vitis vinifera]
F01_cb14534_c0/f2p0/1341	--	--	--	--	--	--	--	--	--	S	Function unknown	PREDICTED: uncharacterized protein LOC105162958 [Sesamum indicum]
F01_cb3081_c1/f1p0/2054	[C]	Energy production and conversion	Molecular Function: D-lactate dehydrogenase (cytochrome) activity (GO:0004458);; Molecular Function: ATP binding (GO:0005524);; Molecular Function: UDP-N-acetylmuramate dehydrogenase activity (GO:0008762);; Molecular Function: glycolate oxidase activity (GO:0008891);; Molecular Function: glycolate dehydrogenase activity (GO:0019154);; Molecular Function: identical protein binding (GO:0042802);; M…	K00102|0|rcu:RCOM_0422880|d-lactate dehydrogenase, putative (EC:1.1.2.4); K00102 D-lactate dehydrogenase (cytochrome) [EC:1.1.2.4] (A)	ko00620:Pyruvate metabolism	[C]	Energy production and conversion	FAD linked oxidases, C-terminal domain;; FAD binding domain	D-lactate dehydrogenase [cytochrome], mitochondrial (Precursor) GN=F15M7.11 OS=Arabidopsis thaliana (Mouse-ear cress) PE=1 SV=1	C	Energy production and conversion	PREDICTED: D-lactate dehydrogenase [cytochrome], mitochondrial [Beta vulgaris subsp. vulgaris]
F01_cb14757_c1/f1p0/2449	[TZDR]	--	--	K06268|1.3078e-67|pper:PRUPE_ppa012303mg|hypothetical protein; K06268 serine/threonine-protein phosphatase 2B regulatory subunit (A)	--	[T]	Signal transduction mechanisms	Zein-binding	--	DTZ	--	hypothetical protein MIMGU_mgv1a014866mg [Erythranthe guttata]
F01_cb6959_c12/f1p0/1954	[RTKL]	--	Biological Process: activation of MAPKK activity (GO:0000186);; Molecular Function: MAP kinase kinase kinase activity (GO:0004709);; Molecular Function: protein serine/threonine/tyrosine kinase activity (GO:0004712);; Molecular Function: ATP binding (GO:0005524);; Biological Process: microtubule nucleation (GO:0007020);;	--	--	[T]	Signal transduction mechanisms	Protein kinase domain;; Protein tyrosine kinase	Serine/threonine-protein kinase HT1 GN=HT1 OS=Arabidopsis thaliana (Mouse-ear cress) PE=1 SV=1	T	Signal transduction mechanisms	PREDICTED: serine/threonine-protein kinase HT1-like [Sesamum indicum]
[truncated: 127,498 more rows]
