# Supplementary material for: SMRT sequencing of full-length transcriptome and gene expression analysis in two chemical types of Pogostemon cablin (Blanco) Benth
Source: PeerJ. 2022 Feb 22;10:e12940. doi: 10.7717/peerj.12940 (PMC8877398; doi:10.7717/peerj.12940)
Supplement: Supplemental Information 3 [file peerj-10-12940-s003.xlsx]

## Sheet: ko00900
File S3 The genes related to terpenoid biosynthesis
#GeneID	COG_class	COG_class_annotation	GO_annotation	KEGG_annotation	KEGG_pathway	KOG_class	KOG_class_annotation	Pfam_annotation	Swissprot_annotation	eggNOG_class	eggNOG_class_annotation	nr_annotation
F01_cb11528_c9/f5p0/1495	[I]	Lipid transport and metabolism	Molecular Function: mevalonate kinase activity (GO:0004496);; Molecular Function: ATP binding (GO:0005524);; Cellular Component: cytoplasm (GO:0005737);; Biological Process: isoprenoid biosynthetic process (GO:0008299);; Biological Process: phosphorylation (GO:0016310);;	K00869|0|sot:102582697|mevalonate kinase-like; K00869 mevalonate kinase [EC:2.7.1.36] (A)	ko00900:Terpenoid backbone biosynthesis;ko04146:Peroxisome	[I]	Lipid transport and metabolism	GHMP kinases N terminal domain;; GHMP kinases C terminal	Mevalonate kinase GN=At5g27450 OS=Arabidopsis thaliana (Mouse-ear cress) PE=2 SV=1	I	Lipid transport and metabolism	hypothetical protein MIMGU_mgv1a008028mg [Erythranthe guttata]
F01_cb11528_c2/f1p0/1854	[I]	Lipid transport and metabolism	Molecular Function: mevalonate kinase activity (GO:0004496);; Molecular Function: ATP binding (GO:0005524);; Cellular Component: cytoplasm (GO:0005737);; Biological Process: isoprenoid biosynthetic process (GO:0008299);; Biological Process: phosphorylation (GO:0016310);;	K00869|3.65059e-81|sly:101261961|mevalonate kinase; K00869 mevalonate kinase [EC:2.7.1.36] (A)	ko00900:Terpenoid backbone biosynthesis;ko04146:Peroxisome	[I]	Lipid transport and metabolism	GHMP kinases N terminal domain;; GHMP kinases C terminal	Mevalonate kinase GN=At5g27450 OS=Arabidopsis thaliana (Mouse-ear cress) PE=2 SV=1	I	Lipid transport and metabolism	unnamed protein product [Coffea canephora]
F02_cb12259_c0/f5p0/1504	[I]	Lipid transport and metabolism	Molecular Function: mevalonate kinase activity (GO:0004496);; Molecular Function: ATP binding (GO:0005524);; Cellular Component: cytoplasm (GO:0005737);; Biological Process: isoprenoid biosynthetic process (GO:0008299);; Biological Process: phosphorylation (GO:0016310);;	K00869|0|sot:102582697|mevalonate kinase-like; K00869 mevalonate kinase [EC:2.7.1.36] (A)	ko00900:Terpenoid backbone biosynthesis;ko04146:Peroxisome	[I]	Lipid transport and metabolism	GHMP kinases N terminal domain;; GHMP kinases C terminal	Mevalonate kinase GN=At5g27450 OS=Arabidopsis thaliana (Mouse-ear cress) PE=2 SV=1	I	Lipid transport and metabolism	unnamed protein product [Coffea canephora]
F02_cb12259_c4/f1p0/500	--	--	Molecular Function: mevalonate kinase activity (GO:0004496);; Molecular Function: ATP binding (GO:0005524);; Cellular Component: cytoplasm (GO:0005737);; Biological Process: isoprenoid biosynthetic process (GO:0008299);; Biological Process: phosphorylation (GO:0016310);;	K00869|6.56553e-23|pop:POPTR_0013s02490g|POPTRDRAFT_729638; hypothetical protein; K00869 mevalonate kinase [EC:2.7.1.36] (A)	ko00900:Terpenoid backbone biosynthesis;ko04146:Peroxisome	[I]	Lipid transport and metabolism	GHMP kinases C terminal	Mevalonate kinase GN=At5g27450 OS=Arabidopsis thaliana (Mouse-ear cress) PE=2 SV=1	I	Lipid transport and metabolism	hypothetical protein MIMGU_mgv1a008028mg [Erythranthe guttata]
F02_cb12259_c1/f1p0/1643	[I]	Lipid transport and metabolism	Molecular Function: mevalonate kinase activity (GO:0004496);; Molecular Function: ATP binding (GO:0005524);; Cellular Component: cytoplasm (GO:0005737);; Biological Process: isoprenoid biosynthetic process (GO:0008299);; Biological Process: phosphorylation (GO:0016310);;	K00869|0|sot:102582697|mevalonate kinase-like; K00869 mevalonate kinase [EC:2.7.1.36] (A)	ko00900:Terpenoid backbone biosynthesis;ko04146:Peroxisome	[I]	Lipid transport and metabolism	GHMP kinases N terminal domain;; GHMP kinases C terminal	Mevalonate kinase GN=At5g27450 OS=Arabidopsis thaliana (Mouse-ear cress) PE=2 SV=1	I	Lipid transport and metabolism	unnamed protein product [Coffea canephora]
F02_cb12259_c2/f1p0/2367	[I]	Lipid transport and metabolism	Molecular Function: mevalonate kinase activity (GO:0004496);; Molecular Function: ATP binding (GO:0005524);; Cellular Component: cytoplasm (GO:0005737);; Biological Process: isoprenoid biosynthetic process (GO:0008299);; Biological Process: phosphorylation (GO:0016310);;	K00869|6.37539e-132|sot:102582697|mevalonate kinase-like; K00869 mevalonate kinase [EC:2.7.1.36] (A)	ko00900:Terpenoid backbone biosynthesis;ko04146:Peroxisome	[I]	Lipid transport and metabolism	GHMP kinases C terminal;; Galactokinase galactose-binding signature	Mevalonate kinase GN=At5g27450 OS=Arabidopsis thaliana (Mouse-ear cress) PE=2 SV=1	I	Lipid transport and metabolism	putative mevalonate kinase, partial [Olea europaea]
F01_cb11528_c3/f1p0/1912	[I]	Lipid transport and metabolism	Molecular Function: mevalonate kinase activity (GO:0004496);; Molecular Function: ATP binding (GO:0005524);; Cellular Component: cytoplasm (GO:0005737);; Biological Process: isoprenoid biosynthetic process (GO:0008299);; Biological Process: phosphorylation (GO:0016310);;	K00869|1.62899e-76|sot:102582697|mevalonate kinase-like; K00869 mevalonate kinase [EC:2.7.1.36] (A)	ko00900:Terpenoid backbone biosynthesis;ko04146:Peroxisome	[I]	Lipid transport and metabolism	GHMP kinases C terminal;; GHMP kinases N terminal domain	Mevalonate kinase GN=At5g27450 OS=Arabidopsis thaliana (Mouse-ear cress) PE=2 SV=1	I	Lipid transport and metabolism	unnamed protein product [Coffea canephora]
F01_cb18124_c4/f1p0/1448	[MG]	--	Molecular Function: catalytic activity (GO:0003824);; Molecular Function: binding (GO:0005488);; Cellular Component: vacuole (GO:0005773);; Biological Process: terpenoid metabolic process (GO:0006721);; Biological Process: response to stress (GO:0006950);; Biological Process: response to hexose (GO:0009746);; Cellular Component: membrane (GO:0016020);; Biological Process: cellular response to sti…	K15891|9.75188e-135|sly:101264803|dihydroflavonol-4-reductase; K15891 farnesol dehydrogenase [EC:1.1.1.216] (A)	ko00900:Terpenoid backbone biosynthesis;ko00909:Sesquiterpenoid and triterpenoid biosynthesis	[V]	Defense mechanisms	NAD dependent epimerase/dehydratase family;; 3-beta hydroxysteroid dehydrogenase/isomerase family;; Male sterility protein;; NADH(P)-binding;; Polysaccharide biosynthesis protein;; NmrA-like family;; short chain dehydrogenase	Dihydroflavonol-4-reductase GN=ANT18 OS=Hordeum vulgare (Barley) PE=3 SV=1	M	Cell wall/membrane/envelope biogenesis	hypothetical protein MIMGU_mgv1a009408mg [Erythranthe guttata]
F01_cb16438_c21333/f1p0/1706	[MG]	--	Cellular Component: vacuolar membrane (GO:0005774);; Cellular Component: endoplasmic reticulum (GO:0005783);; Cellular Component: plasma membrane (GO:0005886);; Biological Process: systemic acquired resistance (GO:0009627);; Biological Process: response to sucrose (GO:0009744);; Biological Process: response to glucose (GO:0009749);; Biological Process: response to fructose (GO:0009750);; Biologic…	K15891|4.84464e-54|fve:101307656|putative dihydroflavonol-4-reductase-like; K15891 farnesol dehydrogenase [EC:1.1.1.216] (A)	ko00900:Terpenoid backbone biosynthesis;ko00909:Sesquiterpenoid and triterpenoid biosynthesis	[V]	Defense mechanisms	NAD dependent epimerase/dehydratase family	--	M	Cell wall/membrane/envelope biogenesis	PREDICTED: uncharacterized protein LOC104093090, partial [Nicotiana tomentosiformis]
F02_cb11041_c78109/f1p0/2026	[MG]	--	Molecular Function: binding (GO:0005488);; Cellular Component: nucleus (GO:0005634);; Cellular Component: vacuolar membrane (GO:0005774);; Cellular Component: endoplasmic reticulum (GO:0005783);; Cellular Component: plasma membrane (GO:0005886);; Biological Process: systemic acquired resistance (GO:0009627);; Biological Process: response to sucrose (GO:0009744);; Biological Process: response to g…	K15891|3.79216e-42|atr:s00126p00088980|AMTR_s00126p00088980; hypothetical protein; K15891 farnesol dehydrogenase [EC:1.1.1.216] (A)	ko00900:Terpenoid backbone biosynthesis;ko00909:Sesquiterpenoid and triterpenoid biosynthesis	[V]	Defense mechanisms	NAD dependent epimerase/dehydratase family	--	M	Cell wall/membrane/envelope biogenesis	hypothetical protein M569_01327, partial [Genlisea aurea]
F01_cb18124_c3/f1p0/1266	[MG]	--	--	K15891|5.13361e-107|sly:101264803|dihydroflavonol-4-reductase; K15891 farnesol dehydrogenase [EC:1.1.1.216] (A)	ko00900:Terpenoid backbone biosynthesis;ko00909:Sesquiterpenoid and triterpenoid biosynthesis	[V]	Defense mechanisms	NAD dependent epimerase/dehydratase family;; NADH(P)-binding;; NmrA-like family;; 3-beta hydroxysteroid dehydrogenase/isomerase family	Dihydroflavonol-4-reductase GN=ANT18 OS=Hordeum vulgare (Barley) PE=3 SV=1	M	Cell wall/membrane/envelope biogenesis	hypothetical protein MIMGU_mgv1a009408mg [Erythranthe guttata]
F02_cb11041_c87671/f1p0/1493	[MG]	--	--	K15891|7.50168e-107|sot:102604685|dihydroflavonol-4-reductase-like; K15891 farnesol dehydrogenase [EC:1.1.1.216] (A)	ko00900:Terpenoid backbone biosynthesis;ko00909:Sesquiterpenoid and triterpenoid biosynthesis	[V]	Defense mechanisms	NAD dependent epimerase/dehydratase family	--	M	Cell wall/membrane/envelope biogenesis	PREDICTED: dihydroflavonol-4-reductase-like [Solanum tuberosum]
F01_cb18124_c2/f1p0/1118	[MG]	--	Molecular Function: catalytic activity (GO:0003824);;	K15891|5.14392e-150|sly:101264803|dihydroflavonol-4-reductase; K15891 farnesol dehydrogenase [EC:1.1.1.216] (A)	ko00900:Terpenoid backbone biosynthesis;ko00909:Sesquiterpenoid and triterpenoid biosynthesis	[V]	Defense mechanisms	NAD dependent epimerase/dehydratase family;; 3-beta hydroxysteroid dehydrogenase/isomerase family;; NADH(P)-binding;; Male sterility protein;; NmrA-like family;; Polysaccharide biosynthesis protein	Dihydroflavonol-4-reductase GN=A1 OS=Zea mays (Maize) PE=3 SV=1	M	Cell wall/membrane/envelope biogenesis	hypothetical protein MIMGU_mgv1a009408mg [Erythranthe guttata]
F01_cb18124_c9/f1p0/1258	[MG]	--	Molecular Function: catalytic activity (GO:0003824);; Molecular Function: binding (GO:0005488);; Cellular Component: vacuole (GO:0005773);; Biological Process: terpenoid metabolic process (GO:0006721);; Biological Process: response to stress (GO:0006950);; Biological Process: response to hexose (GO:0009746);; Cellular Component: membrane (GO:0016020);; Biological Process: cellular response to sti…	K15891|4.18576e-114|sly:101264803|dihydroflavonol-4-reductase; K15891 farnesol dehydrogenase [EC:1.1.1.216] (A)	ko00900:Terpenoid backbone biosynthesis;ko00909:Sesquiterpenoid and triterpenoid biosynthesis	[V]	Defense mechanisms	NAD dependent epimerase/dehydratase family;; NAD dependent epimerase/dehydratase family;; 3-beta hydroxysteroid dehydrogenase/isomerase family;; NADH(P)-binding;; Polysaccharide biosynthesis protein;; NmrA-like family;; Male sterility protein;; short chain dehydrogenase	Dihydroflavonol-4-reductase GN=ANT18 OS=Hordeum vulgare (Barley) PE=3 SV=1	M	Cell wall/membrane/envelope biogenesis	hypothetical protein MIMGU_mgv1a009408mg [Erythranthe guttata]
F02_cb11041_c78936/f1p0/1292	[MG]	--	Molecular Function: binding (GO:0005488);; Cellular Component: nucleus (GO:0005634);; Cellular Component: vacuolar membrane (GO:0005774);; Cellular Component: endoplasmic reticulum (GO:0005783);; Cellular Component: plasma membrane (GO:0005886);; Biological Process: systemic acquired resistance (GO:0009627);; Biological Process: response to sucrose (GO:0009744);; Biological Process: response to g…	K15891|4.76614e-108|mdm:103441129|anthocyanidin reductase; K15891 farnesol dehydrogenase [EC:1.1.1.216] (A)	ko00900:Terpenoid backbone biosynthesis;ko00909:Sesquiterpenoid and triterpenoid biosynthesis	[V]	Defense mechanisms	NAD dependent epimerase/dehydratase family;; 3-beta hydroxysteroid dehydrogenase/isomerase family;; Male sterility protein;; NADH(P)-binding;; Polysaccharide biosynthesis protein;; NmrA-like family;; short chain dehydrogenase	Dihydroflavonol-4-reductase GN=ANT18 OS=Hordeum vulgare (Barley) PE=3 SV=1	M	Cell wall/membrane/envelope biogenesis	hypothetical protein MIMGU_mgv1a009408mg [Erythranthe guttata]
F01_cb18124_c5/f1p0/1310	[MG]	--	Molecular Function: nucleotide binding (GO:0000166);; Cellular Component: vacuolar membrane (GO:0005774);; Cellular Component: endoplasmic reticulum (GO:0005783);; Cellular Component: plasma membrane (GO:0005886);; Biological Process: systemic acquired resistance (GO:0009627);; Biological Process: response to sucrose (GO:0009744);; Biological Process: response to glucose (GO:0009749);; Biological…	K15891|1.51242e-113|sly:101264803|dihydroflavonol-4-reductase; K15891 farnesol dehydrogenase [EC:1.1.1.216] (A)	ko00900:Terpenoid backbone biosynthesis;ko00909:Sesquiterpenoid and triterpenoid biosynthesis	[V]	Defense mechanisms	NAD dependent epimerase/dehydratase family;; 3-beta hydroxysteroid dehydrogenase/isomerase family;; Male sterility protein;; NADH(P)-binding;; NmrA-like family;; Polysaccharide biosynthesis protein	Dihydroflavonol-4-reductase GN=A1 OS=Zea mays (Maize) PE=3 SV=1	M	Cell wall/membrane/envelope biogenesis	hypothetical protein MIMGU_mgv1a009408mg [Erythranthe guttata]
F02_cb11041_c77801/f1p0/1863	[MG]	--	Molecular Function: nucleotide binding (GO:0000166);; Cellular Component: nucleus (GO:0005634);; Cellular Component: vacuolar membrane (GO:0005774);; Cellular Component: endoplasmic reticulum (GO:0005783);; Cellular Component: plasma membrane (GO:0005886);; Biological Process: systemic acquired resistance (GO:0009627);; Biological Process: response to sucrose (GO:0009744);; Biological Process: re…	K15891|3.94736e-60|fve:101307656|putative dihydroflavonol-4-reductase-like; K15891 farnesol dehydrogenase [EC:1.1.1.216] (A)	ko00900:Terpenoid backbone biosynthesis;ko00909:Sesquiterpenoid and triterpenoid biosynthesis	[V]	Defense mechanisms	NAD dependent epimerase/dehydratase family	--	M	Cell wall/membrane/envelope biogenesis	hypothetical protein MIMGU_mgv1a009408mg [Erythranthe guttata]
F02_cb11041_c4722/f1p0/2027	[MG]	--	Molecular Function: binding (GO:0005488);; Cellular Component: nucleus (GO:0005634);; Cellular Component: vacuolar membrane (GO:0005774);; Cellular Component: endoplasmic reticulum (GO:0005783);; Cellular Component: plasma membrane (GO:0005886);; Biological Process: systemic acquired resistance (GO:0009627);; Biological Process: response to sucrose (GO:0009744);; Biological Process: response to g…	K15891|1.01022e-87|sot:102604685|dihydroflavonol-4-reductase-like; K15891 farnesol dehydrogenase [EC:1.1.1.216] (A)	ko00900:Terpenoid backbone biosynthesis;ko00909:Sesquiterpenoid and triterpenoid biosynthesis	[V]	Defense mechanisms	NAD dependent epimerase/dehydratase family;; Reverse transcriptase (RNA-dependent DNA polymerase)	Endonuclease OS=Nicotiana tabacum (Common tobacco) PE=2 SV=1	M	Cell wall/membrane/envelope biogenesis	hypothetical protein MIMGU_mgv1a009408mg [Erythranthe guttata]
F02_cb11041_c79933/f1p0/1695	[MG]	--	Molecular Function: binding (GO:0005488);; Cellular Component: nucleus (GO:0005634);; Cellular Component: vacuolar membrane (GO:0005774);; Cellular Component: endoplasmic reticulum (GO:0005783);; Cellular Component: plasma membrane (GO:0005886);; Biological Process: systemic acquired resistance (GO:0009627);; Biological Process: response to sucrose (GO:0009744);; Biological Process: response to g…	K15891|1.41359e-54|sly:101264803|dihydroflavonol-4-reductase; K15891 farnesol dehydrogenase [EC:1.1.1.216] (A)	ko00900:Terpenoid backbone biosynthesis;ko00909:Sesquiterpenoid and triterpenoid biosynthesis	[V]	Defense mechanisms	NAD dependent epimerase/dehydratase family;; 3-beta hydroxysteroid dehydrogenase/isomerase family;; Male sterility protein;; Polysaccharide biosynthesis protein;; NADH(P)-binding;; NmrA-like family;; short chain dehydrogenase	--	M	Cell wall/membrane/envelope biogenesis	hypothetical protein JCGZ_04294 [Jatropha curcas]
F01_cb18124_c1/f2p0/1285	[MG]	--	Molecular Function: nucleotide binding (GO:0000166);; Cellular Component: vacuolar membrane (GO:0005774);; Cellular Component: endoplasmic reticulum (GO:0005783);; Cellular Component: plasma membrane (GO:0005886);; Biological Process: systemic acquired resistance (GO:0009627);; Biological Process: response to sucrose (GO:0009744);; Biological Process: response to glucose (GO:0009749);; Biological…	K15891|3.89736e-171|sly:101264803|dihydroflavonol-4-reductase; K15891 farnesol dehydrogenase [EC:1.1.1.216] (A)	ko00900:Terpenoid backbone biosynthesis;ko00909:Sesquiterpenoid and triterpenoid biosynthesis	[V]	Defense mechanisms	NAD dependent epimerase/dehydratase family;; 3-beta hydroxysteroid dehydrogenase/isomerase family;; Male sterility protein;; NADH(P)-binding;; NmrA-like family;; Polysaccharide biosynthesis protein	Dihydroflavonol-4-reductase GN=ANT18 OS=Hordeum vulgare (Barley) PE=3 SV=1	M	Cell wall/membrane/envelope biogenesis	PREDICTED: dihydroflavonol-4-reductase isoform X1 [Sesamum indicum]
F01_cb16438_c37187/f1p0/2715	[I]	Lipid transport and metabolism	Biological Process: sulfur amino acid metabolic process (GO:0000096);; Biological Process: MAPK cascade (GO:0000165);; Molecular Function: iron ion binding (GO:0005506);; Biological Process: pentose-phosphate shunt (GO:0006098);; Biological Process: regulation of translation (GO:0006417);; Biological Process: glycine catabolic process (GO:0006546);; Biological Process: protein targeting to membra…	K03526|0|gmx:100801743|4-hydroxy-3-methylbut-2-en-1-yl diphosphate synthase, chloroplastic-like; K03526 (E)-4-hydroxy-3-methylbut-2-enyl-diphosphate synthase [EC:1.17.7.1 1.17.7.3] (A)	ko00900:Terpenoid backbone biosynthesis	--	--	GcpE protein;; GcpE protein	4-hydroxy-3-methylbut-2-en-1-yl diphosphate synthase, chloroplastic (Precursor) GN=MUP24.2 OS=Arabidopsis thaliana (Mouse-ear cress) PE=1 SV=1	I	Lipid transport and metabolism	(E)-4-hydroxy-3-methylbut-2-enyl diphosphate synthase [Salvia miltiorrhiza f. alba]
F01_cb14174_c1/f1p0/1940	[I]	Lipid transport and metabolism	Cellular Component: mitochondrion (GO:0005739);; Molecular Function: 2-C-methyl-D-erythritol 2,4-cyclodiphosphate synthase activity (GO:0008685);; Cellular Component: chloroplast stroma (GO:0009570);; Biological Process: chlorophyll biosynthetic process (GO:0015995);; Biological Process: carotenoid biosynthetic process (GO:0016117);;	K01770|7.09804e-40|sly:101246365|2-C-methyl-D-erythritol 2,4-cyclodiphosphate synthase, chloroplastic; K01770 2-C-methyl-D-erythritol 2,4-cyclodiphosphate synthase [EC:4.6.1.12] (A)	ko00900:Terpenoid backbone biosynthesis	--	--	YgbB family;; YgbB family	2-C-methyl-D-erythritol 2,4-cyclodiphosphate synthase, chloroplastic (Precursor) GN=ISPF OS=Catharanthus roseus (Madagascar periwinkle) PE=2 SV=1	I	Lipid transport and metabolism	2-C-methyl-D-erythritol 2,4-cyclodiphosphate synthase [Nicotiana langsdorffii x Nicotiana sanderae]
F01_cb8417_c29/f1p0/1495	[I]	Lipid transport and metabolism	Molecular Function: binding (GO:0005488);; Biological Process: isoprenoid biosynthetic process (GO:0008299);; Molecular Function: lyase activity (GO:0016829);; Biological Process: organic cyclic compound biosynthetic process (GO:1901362);;	K01597|0|vvi:100251686|diphosphomevalonate decarboxylase; K01597 diphosphomevalonate decarboxylase [EC:4.1.1.33] (A)	ko00900:Terpenoid backbone biosynthesis	[I]	Lipid transport and metabolism	--	--	I	Lipid transport and metabolism	hypothetical protein MIMGU_mgv1a007068mg [Erythranthe guttata]
F02_cb11041_c88419/f2p13/2163	[I]	Lipid transport and metabolism	Molecular Function: hydroxymethylglutaryl-CoA reductase (NADPH) activity (GO:0004420);; Cellular Component: endoplasmic reticulum membrane (GO:0005789);; Biological Process: isoprenoid biosynthetic process (GO:0008299);; Biological Process: coenzyme A metabolic process (GO:0015936);; Cellular Component: integral component of membrane (GO:0016021);; Molecular Function: NADP binding (GO:0050661);; …	K00021|0|cit:102629783|3-hydroxy-3-methylglutaryl-coenzyme A reductase 1-like; K00021 hydroxymethylglutaryl-CoA reductase (NADPH) [EC:1.1.1.34] (A)	ko00900:Terpenoid backbone biosynthesis	[I]	Lipid transport and metabolism	Hydroxymethylglutaryl-coenzyme A reductase;; Hydroxymethylglutaryl-coenzyme A reductase;; Hydroxymethylglutaryl-coenzyme A reductase	3-hydroxy-3-methylglutaryl-coenzyme A reductase GN=HMGR OS=Nicotiana sylvestris (Wood tobacco) PE=2 SV=1	I	Lipid transport and metabolism	PREDICTED: LOW QUALITY PROTEIN: 3-hydroxy-3-methylglutaryl-coenzyme A reductase 1 [Eucalyptus grandis]
F02_cb11041_c50642/f1p1/2411	[I]	Lipid transport and metabolism	Molecular Function: hydroxymethylglutaryl-CoA reductase (NADPH) activity (GO:0004420);; Cellular Component: endoplasmic reticulum membrane (GO:0005789);; Biological Process: isoprenoid biosynthetic process (GO:0008299);; Biological Process: coenzyme A metabolic process (GO:0015936);; Cellular Component: integral component of membrane (GO:0016021);; Molecular Function: NADP binding (GO:0050661);; …	K00021|0|sot:102577899|3-hydroxy-3-methylglutaryl coenzyme A reductase; K00021 hydroxymethylglutaryl-CoA reductase (NADPH) [EC:1.1.1.34] (A)	ko00900:Terpenoid backbone biosynthesis	[I]	Lipid transport and metabolism	Hydroxymethylglutaryl-coenzyme A reductase	3-hydroxy-3-methylglutaryl-coenzyme A reductase OS=Camptotheca acuminata (Happy tree) PE=3 SV=1	I	Lipid transport and metabolism	hypothetical protein MIMGU_mgv1a003590mg [Erythranthe guttata]
F01_cb16438_c55179/f6p2/1724	[IM]	--	Biological Process: isopentenyl diphosphate biosynthetic process, methylerythritol 4-phosphate pathway (GO:0019288);; Biological Process: oxidation-reduction process (GO:0055114);;	K03527|0|vvi:100267479|4-hydroxy-3-methylbut-2-enyl diphosphate reductase, chloroplastic; K03527 4-hydroxy-3-methylbut-2-enyl diphosphate reductase [EC:1.17.1.2] (A)	ko00900:Terpenoid backbone biosynthesis	--	--	LytB protein	4-hydroxy-3-methylbut-2-enyl diphosphate reductase, chloroplastic (Precursor) GN=F10M10.120 OS=Arabidopsis thaliana (Mouse-ear cress) PE=2 SV=1	I	Lipid transport and metabolism	PREDICTED: 4-hydroxy-3-methylbut-2-enyl diphosphate reductase, chloroplastic [Sesamum indicum]
F01_cb8417_c12/f1p4/1617	[I]	Lipid transport and metabolism	Molecular Function: diphosphomevalonate decarboxylase activity (GO:0004163);; Molecular Function: ATP binding (GO:0005524);; Biological Process: isoprenoid biosynthetic process (GO:0008299);;	K01597|0|sot:102581346|diphosphomevalonate decarboxylase-like; K01597 diphosphomevalonate decarboxylase [EC:4.1.1.33] (A)	ko00900:Terpenoid backbone biosynthesis	[I]	Lipid transport and metabolism	--	--	I	Lipid transport and metabolism	mevalonate diphosphate decarboxylase [Nicotiana langsdorffii x Nicotiana sanderae]
F01_cb16438_c21123/f1p0/2333	[I]	Lipid transport and metabolism	Molecular Function: hydroxymethylglutaryl-CoA reductase (NADPH) activity (GO:0004420);; Cellular Component: endoplasmic reticulum membrane (GO:0005789);; Biological Process: isoprenoid biosynthetic process (GO:0008299);; Biological Process: coenzyme A metabolic process (GO:0015936);; Cellular Component: integral component of membrane (GO:0016021);; Molecular Function: NADP binding (GO:0050661);; …	K00021|0|sot:102599791|hmg1; 3-hydroxy-3-methylglutaryl-coenzyme A reductase 1-like; K00021 hydroxymethylglutaryl-CoA reductase (NADPH) [EC:1.1.1.34] (A)	ko00900:Terpenoid backbone biosynthesis	[I]	Lipid transport and metabolism	Hydroxymethylglutaryl-coenzyme A reductase	3-hydroxy-3-methylglutaryl-coenzyme A reductase OS=Camptotheca acuminata (Happy tree) PE=3 SV=1	I	Lipid transport and metabolism	hypothetical protein MIMGU_mgv1a003590mg [Erythranthe guttata]
F01_cb17470_c4/f1p3/1550	[I]	Lipid transport and metabolism	Molecular Function: hydroxymethylglutaryl-CoA reductase (NADPH) activity (GO:0004420);; Cellular Component: endoplasmic reticulum membrane (GO:0005789);; Biological Process: isoprenoid biosynthetic process (GO:0008299);; Biological Process: coenzyme A metabolic process (GO:0015936);; Cellular Component: integral component of membrane (GO:0016021);; Molecular Function: NADP binding (GO:0050661);; …	K00021|4.19561e-102|sot:102577899|3-hydroxy-3-methylglutaryl coenzyme A reductase; K00021 hydroxymethylglutaryl-CoA reductase (NADPH) [EC:1.1.1.34] (A)	ko00900:Terpenoid backbone biosynthesis	[I]	Lipid transport and metabolism	Hydroxymethylglutaryl-coenzyme A reductase	3-hydroxy-3-methylglutaryl-coenzyme A reductase OS=Camptotheca acuminata (Happy tree) PE=3 SV=1	I	Lipid transport and metabolism	hydroxy-methyl-glutaryl-coenzyme A reductase [Bacopa monnieri]
F01_cb8417_c19/f1p0/1797	[I]	Lipid transport and metabolism	Molecular Function: diphosphomevalonate decarboxylase activity (GO:0004163);; Molecular Function: ATP binding (GO:0005524);; Biological Process: isoprenoid biosynthetic process (GO:0008299);; Molecular Function: protein homodimerization activity (GO:0042803);;	K01597|0|vvi:100251686|diphosphomevalonate decarboxylase; K01597 diphosphomevalonate decarboxylase [EC:4.1.1.33] (A)	ko00900:Terpenoid backbone biosynthesis	[I]	Lipid transport and metabolism	GHMP kinases N terminal domain	--	I	Lipid transport and metabolism	mevalonate diphosphate decarboxylase [Salvia miltiorrhiza]
F01_cb16438_c4578/f1p0/2610	[I]	Lipid transport and metabolism	Molecular Function: iron ion binding (GO:0005506);; Biological Process: terpenoid biosynthetic process (GO:0016114);; Molecular Function: 4-hydroxy-3-methylbut-2-en-1-yl diphosphate synthase activity (GO:0046429);; Biological Process: oxidation-reduction process (GO:0055114);;	K03526|0|gmx:100801743|4-hydroxy-3-methylbut-2-en-1-yl diphosphate synthase, chloroplastic-like; K03526 (E)-4-hydroxy-3-methylbut-2-enyl-diphosphate synthase [EC:1.17.7.1 1.17.7.3] (A)	ko00900:Terpenoid backbone biosynthesis	--	--	GcpE protein;; GcpE protein;; GcpE protein	4-hydroxy-3-methylbut-2-en-1-yl diphosphate synthase, chloroplastic (Precursor) GN=MUP24.2 OS=Arabidopsis thaliana (Mouse-ear cress) PE=1 SV=1	I	Lipid transport and metabolism	(E)-4-hydroxy-3-methylbut-2-enyl diphosphate synthase [Salvia miltiorrhiza f. alba]
F01_cb16438_c33504/f1p0/1746	[I]	Lipid transport and metabolism	Molecular Function: transferase activity, transferring alkyl or aryl (other than methyl) groups (GO:0016765);;	K11778|2.3989e-129|vvi:100251570|dehydrodolichyl diphosphate synthase 6-like; K11778 ditrans,polycis-polyprenyl diphosphate synthase [EC:2.5.1.87] (A)	ko00900:Terpenoid backbone biosynthesis	[I]	Lipid transport and metabolism	Putative undecaprenyl diphosphate synthase	Dehydrodolichyl diphosphate synthase 6 GN=At2g17570 OS=Arabidopsis thaliana (Mouse-ear cress) PE=2 SV=2	I	Lipid transport and metabolism	PREDICTED: dehydrodolichyl diphosphate synthase 6-like [Sesamum indicum]
F01_cb4189_c18/f1p0/1370	[H]	Coenzyme transport and metabolism	Molecular Function: dimethylallyltranstransferase activity (GO:0004161);; Molecular Function: geranyltranstransferase activity (GO:0004337);; Biological Process: isoprenoid biosynthetic process (GO:0008299);;	K00787|7.25834e-178|cmo:103501295|farnesyl pyrophosphate synthase 1; K00787 farnesyl diphosphate synthase [EC:2.5.1.1 2.5.1.10] (A)	ko00900:Terpenoid backbone biosynthesis	[H]	Coenzyme transport and metabolism	Polyprenyl synthetase	Farnesyl pyrophosphate synthase 1 GN=FPS1 OS=Lupinus albus (White lupin) PE=2 SV=1	H	Coenzyme transport and metabolism	farnesyl diphosphate synthetase [Salvia miltiorrhiza]
F01_cb16438_c37446/f1p0/2242	[IM]	--	Biological Process: isopentenyl diphosphate biosynthetic process, methylerythritol 4-phosphate pathway (GO:0019288);; Biological Process: oxidation-reduction process (GO:0055114);;	K03527|0|vvi:100267479|4-hydroxy-3-methylbut-2-enyl diphosphate reductase, chloroplastic; K03527 4-hydroxy-3-methylbut-2-enyl diphosphate reductase [EC:1.17.1.2] (A)	ko00900:Terpenoid backbone biosynthesis	--	--	LytB protein;; LytB protein	4-hydroxy-3-methylbut-2-enyl diphosphate reductase, chloroplastic (Precursor) GN=F10M10.120 OS=Arabidopsis thaliana (Mouse-ear cress) PE=2 SV=1	I	Lipid transport and metabolism	PREDICTED: 4-hydroxy-3-methylbut-2-enyl diphosphate reductase, chloroplastic [Sesamum indicum]
F02_cb1116_c0/f1p0/3885	[I]	Lipid transport and metabolism	--	K11778|2.80785e-98|sly:101244138|dehydrodolichyl diphosphate synthase 2-like; K11778 ditrans,polycis-polyprenyl diphosphate synthase [EC:2.5.1.87] (A)	ko00900:Terpenoid backbone biosynthesis	[I]	Lipid transport and metabolism	Putative undecaprenyl diphosphate synthase	Dehydrodolichyl diphosphate synthase 2 GN=At5g58770 OS=Arabidopsis thaliana (Mouse-ear cress) PE=2 SV=2	I	Lipid transport and metabolism	PREDICTED: dehydrodolichyl diphosphate synthase 2-like [Sesamum indicum]
F02_cb7697_c13/f1p0/2138	[IM]	--	Biological Process: isopentenyl diphosphate biosynthetic process, methylerythritol 4-phosphate pathway (GO:0019288);; Biological Process: oxidation-reduction process (GO:0055114);;	K03527|1.40257e-142|tcc:TCM_007277|4-hydroxy-3-methylbut-2-enyl diphosphate reductase isoform 1; K03527 4-hydroxy-3-methylbut-2-enyl diphosphate reductase [EC:1.17.1.2] (A)	ko00900:Terpenoid backbone biosynthesis	--	--	LytB protein;; LytB protein;; LytB protein	4-hydroxy-3-methylbut-2-enyl diphosphate reductase, chloroplastic (Precursor) GN=OSJNBa0079G12.18 OS=Oryza sativa subsp. japonica (Rice) PE=2 SV=1	I	Lipid transport and metabolism	PREDICTED: 4-hydroxy-3-methylbut-2-enyl diphosphate reductase, chloroplastic [Sesamum indicum]
F01_cb8168_c2/f1p0/2160	[I]	Lipid transport and metabolism	Molecular Function: hydroxymethylglutaryl-CoA reductase (NADPH) activity (GO:0004420);; Biological Process: isoprenoid biosynthetic process (GO:0008299);; Biological Process: coenzyme A metabolic process (GO:0015936);; Cellular Component: integral component of membrane (GO:0016021);; Molecular Function: NADP binding (GO:0050661);; Biological Process: oxidation-reduction process (GO:0055114);;	K00021|0|rcu:RCOM_1602200|hmg-CoA reductase, putative (EC:1.1.1.34); K00021 hydroxymethylglutaryl-CoA reductase (NADPH) [EC:1.1.1.34] (A)	ko00900:Terpenoid backbone biosynthesis	[I]	Lipid transport and metabolism	Hydroxymethylglutaryl-coenzyme A reductase	3-hydroxy-3-methylglutaryl-coenzyme A reductase 1 GN=HMGR1 OS=Hevea brasiliensis (Para rubber tree) PE=2 SV=1	I	Lipid transport and metabolism	3-hydroxy-3-methylglutaryl-coenzyme A reductase [Salvia miltiorrhiza]
F02_cb1130_c7/f1p0/1072	--	--	Molecular Function: endopeptidase activity (GO:0004175);; Cellular Component: endoplasmic reticulum (GO:0005783);; Biological Process: proteolysis (GO:0006508);; Cellular Component: membrane (GO:0016020);; Biological Process: protein processing (GO:0016485);; Biological Process: cellular protein localization (GO:0034613);; Biological Process: CAAX-box protein maturation (GO:0080120);;	K08658|9.20626e-90|sly:101259663|CAAX prenyl protease 2; K08658 prenyl protein peptidase [EC:3.4.22.-] (A)	ko00900:Terpenoid backbone biosynthesis	[O]	Posttranslational modification, protein turnover, chaperones	--	CAAX prenyl protease 2 GN=F2H17 OS=Arabidopsis thaliana (Mouse-ear cress) PE=2 SV=2	O	Posttranslational modification, protein turnover, chaperones	PREDICTED: CAAX prenyl protease 2 [Sesamum indicum]
F01_cb14218_c0/f1p0/982	[I]	Lipid transport and metabolism	Molecular Function: isopentenyl-diphosphate delta-isomerase activity (GO:0004452);; Biological Process: isoprenoid biosynthetic process (GO:0008299);; Molecular Function: hydrolase activity (GO:0016787);;	K01823|6.5351e-161|pvu:PHAVU_L002800g|hypothetical protein; K01823 isopentenyl-diphosphate delta-isomerase [EC:5.3.3.2] (A)	ko00900:Terpenoid backbone biosynthesis	[Q]	Secondary metabolites biosynthesis, transport and catabolism	NUDIX domain	Isopentenyl-diphosphate Delta-isomerase II GN=IPI2 OS=Camptotheca acuminata (Happy tree) PE=2 SV=1	I	Lipid transport and metabolism	Isopentenyl-diphosphate Delta-isomerase II [Morus notabilis]
F01_cb12076_c21/f12p1/1649	[O]	Posttranslational modification, protein turnover, chaperones	Molecular Function: metalloendopeptidase activity (GO:0004222);; Cellular Component: vacuole (GO:0005773);; Cellular Component: endoplasmic reticulum (GO:0005783);; Biological Process: proteolysis (GO:0006508);; Biological Process: ER to Golgi vesicle-mediated transport (GO:0006888);; Cellular Component: membrane (GO:0016020);; Biological Process: CAAX-box protein processing (GO:0071586);;	K06013|0|pop:POPTR_0014s08490g|POPTRDRAFT_664019; CAAX protease family protein; K06013 STE24 endopeptidase [EC:3.4.24.84] (A)	ko00900:Terpenoid backbone biosynthesis	[R]	General function prediction only	Peptidase family M48	CAAX prenyl protease 1 homolog OS=Arabidopsis thaliana (Mouse-ear cress) PE=1 SV=1	O	Posttranslational modification, protein turnover, chaperones	CAAX protease family protein [Populus trichocarpa]
F01_cb21442_c0/f1p0/1172	[O]	Posttranslational modification, protein turnover, chaperones	Molecular Function: farnesyltranstransferase activity (GO:0004311);; Molecular Function: protein farnesyltransferase activity (GO:0004660);; Molecular Function: CAAX-protein geranylgeranyltransferase activity (GO:0004662);; Cellular Component: CAAX-protein geranylgeranyltransferase complex (GO:0005953);; Cellular Component: protein farnesyltransferase complex (GO:0005965);; Biological Process: re…	K05955|1.48181e-120|sly:544036|FTA, LeFTA; farnesyl protein transferase subunit A (EC:2.5.1.59 2.5.1.58); K05955 protein farnesyltransferase/geranylgeranyltransferase type-1 subunit alpha [EC:2.5.1.58 2.5.1.59] (A)	ko00900:Terpenoid backbone biosynthesis	[O]	Posttranslational modification, protein turnover, chaperones	--	Protein farnesyltransferase/geranylgeranyltransferase type-1 subunit alpha GN=FTA OS=Solanum lycopersicum (Tomato) PE=1 SV=1	O	Posttranslational modification, protein turnover, chaperones	PREDICTED: protein farnesyltransferase/geranylgeranyltransferase type-1 subunit alpha-like [Sesamum indicum]
F01_cb9887_c3/f1p1/1986	[H]	Coenzyme transport and metabolism	Molecular Function: trans-hexaprenyltranstransferase activity (GO:0000010);; Biological Process: isoprenoid biosynthetic process (GO:0008299);; Biological Process: photosynthesis (GO:0015979);;	K05356|0|rcu:RCOM_1182760|solanesyl diphosphate synthase, putative (EC:2.5.1.30); K05356 all-trans-nonaprenyl-diphosphate synthase [EC:2.5.1.84 2.5.1.85] (A)	ko00900:Terpenoid backbone biosynthesis	[H]	Coenzyme transport and metabolism	Polyprenyl synthetase	Solanesyl diphosphate synthase 1 GN=T30F21.15 OS=Arabidopsis thaliana (Mouse-ear cress) PE=1 SV=1	H	Coenzyme transport and metabolism	PREDICTED: probable solanesyl-diphosphate synthase 3, chloroplastic isoform X2 [Sesamum indicum]
F01_cb16438_c31630/f6p0/1723	[IM]	--	Biological Process: isopentenyl diphosphate biosynthetic process, methylerythritol 4-phosphate pathway (GO:0019288);; Biological Process: oxidation-reduction process (GO:0055114);;	K03527|0|vvi:100267479|4-hydroxy-3-methylbut-2-enyl diphosphate reductase, chloroplastic; K03527 4-hydroxy-3-methylbut-2-enyl diphosphate reductase [EC:1.17.1.2] (A)	ko00900:Terpenoid backbone biosynthesis	--	--	LytB protein	4-hydroxy-3-methylbut-2-enyl diphosphate reductase, chloroplastic (Precursor) GN=OSJNBa0079G12.18 OS=Oryza sativa subsp. japonica (Rice) PE=2 SV=1	I	Lipid transport and metabolism	PREDICTED: 4-hydroxy-3-methylbut-2-enyl diphosphate reductase, chloroplastic [Sesamum indicum]
F01_cb11122_c14/f1p0/1891	[H]	Coenzyme transport and metabolism	Molecular Function: prenyltransferase activity (GO:0004659);; Biological Process: isoprenoid biosynthetic process (GO:0008299);; Cellular Component: plastid (GO:0009536);;	K14066|0|sot:102588989|solanesyl diphosphate synthase 3, chloroplastic/mitochondrial-like; K14066 geranyl diphosphate synthase [EC:2.5.1.1] (A)	ko00900:Terpenoid backbone biosynthesis	[H]	Coenzyme transport and metabolism	Polyprenyl synthetase	Solanesyl diphosphate synthase 3, chloroplastic/mitochondrial (Precursor) GN=T31E10.3 OS=Arabidopsis thaliana (Mouse-ear cress) PE=1 SV=1	H	Coenzyme transport and metabolism	PREDICTED: solanesyl diphosphate synthase 3, chloroplastic/mitochondrial isoform X1 [Sesamum indicum]
F01_cb3740_c12/f1p0/1411	[I]	Lipid transport and metabolism	Biological Process: sterol biosynthetic process (GO:0016126);; Biological Process: pentacyclic triterpenoid biosynthetic process (GO:0019745);;	K00938|1.665e-79|tcc:TCM_016612|GHMP kinase family protein; K00938 phosphomevalonate kinase [EC:2.7.4.2] (A)	ko00900:Terpenoid backbone biosynthesis	[I]	Lipid transport and metabolism	--	--	I	Lipid transport and metabolism	GHMP kinase family protein [Theobroma cacao]
F01_cb16438_c19663/f1p0/2550	[I]	Lipid transport and metabolism	Molecular Function: hydroxymethylglutaryl-CoA reductase (NADPH) activity (GO:0004420);; Cellular Component: endoplasmic reticulum membrane (GO:0005789);; Biological Process: isoprenoid biosynthetic process (GO:0008299);; Biological Process: coenzyme A metabolic process (GO:0015936);; Cellular Component: integral component of membrane (GO:0016021);; Molecular Function: NADP binding (GO:0050661);; …	K00021|0|sot:102577899|3-hydroxy-3-methylglutaryl coenzyme A reductase; K00021 hydroxymethylglutaryl-CoA reductase (NADPH) [EC:1.1.1.34] (A)	ko00900:Terpenoid backbone biosynthesis	[I]	Lipid transport and metabolism	Hydroxymethylglutaryl-coenzyme A reductase	3-hydroxy-3-methylglutaryl-coenzyme A reductase OS=Camptotheca acuminata (Happy tree) PE=3 SV=1	I	Lipid transport and metabolism	PREDICTED: 3-hydroxy-3-methylglutaryl-coenzyme A reductase [Sesamum indicum]
F01_cb17128_c4/f5p0/998	[O]	Posttranslational modification, protein turnover, chaperones	Molecular Function: protein C-terminal S-isoprenylcysteine carboxyl O-methyltransferase activity (GO:0004671);; Cellular Component: endoplasmic reticulum (GO:0005783);; Biological Process: C-terminal protein methylation (GO:0006481);; Cellular Component: integral component of membrane (GO:0016021);;	K00587|8.28178e-104|fve:101310986|protein-S-isoprenylcysteine O-methyltransferase B-like isoform 1; K00587 protein-S-isoprenylcysteine O-methyltransferase [EC:2.1.1.100] (A)	ko00900:Terpenoid backbone biosynthesis	[O]	Posttranslational modification, protein turnover, chaperones	Isoprenylcysteine carboxyl methyltransferase (ICMT) family;; Phospholipid methyltransferase	Protein-S-isoprenylcysteine O-methyltransferase B GN=F8L15.70 OS=Arabidopsis thaliana (Mouse-ear cress) PE=1 SV=1	O	Posttranslational modification, protein turnover, chaperones	PREDICTED: protein-S-isoprenylcysteine O-methyltransferase A isoform X2 [Sesamum indicum]
F02_cb1116_c6/f1p0/2566	[I]	Lipid transport and metabolism	Biological Process: ubiquinone biosynthetic process (GO:0006744);; Molecular Function: zinc ion binding (GO:0008270);; Cellular Component: chloroplast (GO:0009507);; Biological Process: dolichol biosynthetic process (GO:0019408);; Molecular Function: dehydrodolichyl diphosphate synthase activity (GO:0045547);;	K11778|7.54623e-54|sot:102581796|dehydrodolichyl diphosphate synthase 2-like; K11778 ditrans,polycis-polyprenyl diphosphate synthase [EC:2.5.1.87] (A)	ko00900:Terpenoid backbone biosynthesis	[I]	Lipid transport and metabolism	--	Dehydrodolichyl diphosphate synthase 2 GN=At5g58770 OS=Arabidopsis thaliana (Mouse-ear cress) PE=2 SV=2	I	Lipid transport and metabolism	PREDICTED: dehydrodolichyl diphosphate synthase 2-like [Sesamum indicum]
F01_cb12158_c2/f1p0/1656	[H]	Coenzyme transport and metabolism	Molecular Function: dimethylallyltranstransferase activity (GO:0004161);; Molecular Function: farnesyltranstransferase activity (GO:0004311);; Molecular Function: geranyltranstransferase activity (GO:0004337);; Cellular Component: chloroplast (GO:0009507);; Biological Process: carotenoid biosynthetic process (GO:0016117);; Biological Process: geranyl diphosphate biosynthetic process (GO:0033384);…	K13789|0|mdm:103418313|geranylgeranyl pyrophosphate synthase, chloroplastic-like; K13789 geranylgeranyl diphosphate synthase, type II [EC:2.5.1.1 2.5.1.10 2.5.1.29] (A)	ko00900:Terpenoid backbone biosynthesis	[H]	Coenzyme transport and metabolism	Polyprenyl synthetase	Geranylgeranyl pyrophosphate synthase, chloroplastic (Precursor) GN=GGPS OS=Hevea brasiliensis (Para rubber tree) PE=1 SV=1	H	Coenzyme transport and metabolism	Geranylgeranyl pyrophosphate synthase [Morus notabilis]
F02_cb12587_c3/f1p1/1455	[H]	Coenzyme transport and metabolism	Molecular Function: dimethylallyltranstransferase activity (GO:0004161);; Molecular Function: farnesyltranstransferase activity (GO:0004311);; Molecular Function: geranyltranstransferase activity (GO:0004337);; Cellular Component: chloroplast (GO:0009507);; Biological Process: carotenoid biosynthetic process (GO:0016117);; Biological Process: geranyl diphosphate biosynthetic process (GO:0033384);…	K13789|5.86912e-179|mdm:103418313|geranylgeranyl pyrophosphate synthase, chloroplastic-like; K13789 geranylgeranyl diphosphate synthase, type II [EC:2.5.1.1 2.5.1.10 2.5.1.29] (A)	ko00900:Terpenoid backbone biosynthesis	[H]	Coenzyme transport and metabolism	Polyprenyl synthetase	Geranylgeranyl pyrophosphate synthase, chloroplastic (Precursor) GN=GGPS1 OS=Catharanthus roseus (Madagascar periwinkle) PE=3 SV=1	H	Coenzyme transport and metabolism	PREDICTED: geranylgeranyl pyrophosphate synthase, chloroplastic-like [Sesamum indicum]
F01_cb8417_c8/f1p0/1901	[I]	Lipid transport and metabolism	Molecular Function: diphosphomevalonate decarboxylase activity (GO:0004163);; Molecular Function: ATP binding (GO:0005524);; Biological Process: isoprenoid biosynthetic process (GO:0008299);; Molecular Function: protein homodimerization activity (GO:0042803);;	K01597|5.23204e-146|vvi:100251686|diphosphomevalonate decarboxylase; K01597 diphosphomevalonate decarboxylase [EC:4.1.1.33] (A)	ko00900:Terpenoid backbone biosynthesis	[I]	Lipid transport and metabolism	--	--	I	Lipid transport and metabolism	mevalonate diphosphate decarboxylase [Salvia miltiorrhiza]
F02_cb3805_c2/f1p0/3314	[O]	Posttranslational modification, protein turnover, chaperones	Molecular Function: protein farnesyltransferase activity (GO:0004660);; Cellular Component: protein farnesyltransferase complex (GO:0005965);; Biological Process: protein farnesylation (GO:0018343);; Biological Process: regulation of cell proliferation (GO:0042127);;	K05954|2.66375e-41|vvi:100266301|protein farnesyltransferase subunit beta; K05954 protein farnesyltransferase subunit beta [EC:2.5.1.58] (A)	ko00900:Terpenoid backbone biosynthesis	[O]	Posttranslational modification, protein turnover, chaperones	Prenyltransferase and squalene oxidase repeat;; Prenyltransferase and squalene oxidase repeat	Protein farnesyltransferase subunit beta GN=FTB OS=Pisum sativum (Garden pea) PE=1 SV=1	O	Posttranslational modification, protein turnover, chaperones	PREDICTED: protein farnesyltransferase subunit beta [Sesamum indicum]
F01_cb16438_c9487/f1p0/2736	[I]	Lipid transport and metabolism	Molecular Function: iron ion binding (GO:0005506);; Biological Process: terpenoid biosynthetic process (GO:0016114);; Molecular Function: 4-hydroxy-3-methylbut-2-en-1-yl diphosphate synthase activity (GO:0046429);; Biological Process: oxidation-reduction process (GO:0055114);;	K03526|0|mdm:103413028|4-hydroxy-3-methylbut-2-en-1-yl diphosphate synthase, chloroplastic; K03526 (E)-4-hydroxy-3-methylbut-2-enyl-diphosphate synthase [EC:1.17.7.1 1.17.7.3] (A)	ko00900:Terpenoid backbone biosynthesis	--	--	GcpE protein	4-hydroxy-3-methylbut-2-en-1-yl diphosphate synthase, chloroplastic (Precursor) GN=MUP24.2 OS=Arabidopsis thaliana (Mouse-ear cress) PE=1 SV=1	I	Lipid transport and metabolism	(E)-4-hydroxy-3-methylbut-2-enyl diphosphate synthase [Salvia miltiorrhiza f. alba]
F01_cb8417_c28/f1p1/1388	[I]	Lipid transport and metabolism	Molecular Function: diphosphomevalonate decarboxylase activity (GO:0004163);; Molecular Function: ATP binding (GO:0005524);; Biological Process: isoprenoid biosynthetic process (GO:0008299);; Molecular Function: protein homodimerization activity (GO:0042803);;	K01597|0|vvi:100251686|diphosphomevalonate decarboxylase; K01597 diphosphomevalonate decarboxylase [EC:4.1.1.33] (A)	ko00900:Terpenoid backbone biosynthesis	[I]	Lipid transport and metabolism	GHMP kinases N terminal domain	--	I	Lipid transport and metabolism	mevalonate diphosphate decarboxylase [Salvia miltiorrhiza]
F01_cb16438_c54986/f3p1/2052	[I]	Lipid transport and metabolism	Molecular Function: hydroxymethylglutaryl-CoA reductase (NADPH) activity (GO:0004420);; Cellular Component: endoplasmic reticulum membrane (GO:0005789);; Biological Process: isoprenoid biosynthetic process (GO:0008299);; Biological Process: coenzyme A metabolic process (GO:0015936);; Cellular Component: integral component of membrane (GO:0016021);; Molecular Function: NADP binding (GO:0050661);; …	K00021|0|sly:101265292|HMG2; 3-hydroxy-3-methylglutaryl-coenzyme A reductase 2-like; K00021 hydroxymethylglutaryl-CoA reductase (NADPH) [EC:1.1.1.34] (A)	ko00900:Terpenoid backbone biosynthesis	[I]	Lipid transport and metabolism	Hydroxymethylglutaryl-coenzyme A reductase	3-hydroxy-3-methylglutaryl-coenzyme A reductase OS=Camptotheca acuminata (Happy tree) PE=3 SV=1	I	Lipid transport and metabolism	hypothetical protein MIMGU_mgv1a003590mg [Erythranthe guttata]
F01_cb16438_c4590/f1p0/2162	[I]	Lipid transport and metabolism	Molecular Function: iron ion binding (GO:0005506);; Biological Process: terpenoid biosynthetic process (GO:0016114);; Molecular Function: 4-hydroxy-3-methylbut-2-en-1-yl diphosphate synthase activity (GO:0046429);; Biological Process: oxidation-reduction process (GO:0055114);;	K03526|0|gmx:100801743|4-hydroxy-3-methylbut-2-en-1-yl diphosphate synthase, chloroplastic-like; K03526 (E)-4-hydroxy-3-methylbut-2-enyl-diphosphate synthase [EC:1.17.7.1 1.17.7.3] (A)	ko00900:Terpenoid backbone biosynthesis	--	--	GcpE protein;; GcpE protein	4-hydroxy-3-methylbut-2-en-1-yl diphosphate synthase, chloroplastic (Precursor) GN=MUP24.2 OS=Arabidopsis thaliana (Mouse-ear cress) PE=1 SV=1	I	Lipid transport and metabolism	4-hydroxy-3-methylbut-2-enyl diphosphate synthase [Lavandula angustifolia]
F02_cb2495_c12/f1p0/1523	[I]	Lipid transport and metabolism	Molecular Function: transferase activity, transferring alkyl or aryl (other than methyl) groups (GO:0016765);;	K11778|2.01464e-132|vvi:100251570|dehydrodolichyl diphosphate synthase 6-like; K11778 ditrans,polycis-polyprenyl diphosphate synthase [EC:2.5.1.87] (A)	ko00900:Terpenoid backbone biosynthesis	[I]	Lipid transport and metabolism	Putative undecaprenyl diphosphate synthase	Dehydrodolichyl diphosphate synthase 6 GN=At2g17570 OS=Arabidopsis thaliana (Mouse-ear cress) PE=2 SV=2	I	Lipid transport and metabolism	PREDICTED: dehydrodolichyl diphosphate synthase 6-like [Sesamum indicum]
F02_cb11607_c7/f1p1/1436	[I]	Lipid transport and metabolism	Molecular Function: isopentenyl-diphosphate delta-isomerase activity (GO:0004452);; Biological Process: isoprenoid biosynthetic process (GO:0008299);; Molecular Function: hydrolase activity (GO:0016787);;	K01823|3.53958e-157|sot:102580973|isopentenyl-diphosphate Delta-isomerase II-like; K01823 isopentenyl-diphosphate delta-isomerase [EC:5.3.3.2] (A)	ko00900:Terpenoid backbone biosynthesis	[Q]	Secondary metabolites biosynthesis, transport and catabolism	NUDIX domain	Isopentenyl-diphosphate Delta-isomerase I GN=IPI1 OS=Camptotheca acuminata (Happy tree) PE=2 SV=1	I	Lipid transport and metabolism	PREDICTED: isopentenyl-diphosphate Delta-isomerase I [Sesamum indicum]
F02_cb9580_c4/f1p0/3313	--	--	Molecular Function: prenylcysteine oxidase activity (GO:0001735);; Cellular Component: vacuolar membrane (GO:0005774);; Biological Process: abscisic acid-activated signaling pathway (GO:0009738);; Biological Process: prenylated protein catabolic process (GO:0030327);; Biological Process: prenylcysteine catabolic process (GO:0030328);; Biological Process: hydrogen peroxide catabolic process (GO:00…	K05906|1.1225e-113|cit:102619140|farnesylcysteine lyase-like; K05906 prenylcysteine oxidase / farnesylcysteine lyase [EC:1.8.3.5 1.8.3.6] (A)	ko00900:Terpenoid backbone biosynthesis	--	--	Prenylcysteine lyase;; NAD(P)-binding Rossmann-like domain;; Flavin containing amine oxidoreductase;; Prenylcysteine lyase	Farnesylcysteine lyase (Precursor) GN=FLCY OS=Arabidopsis thaliana (Mouse-ear cress) PE=1 SV=1	O	Posttranslational modification, protein turnover, chaperones	PREDICTED: farnesylcysteine lyase [Sesamum indicum]
F01_cb5952_c8/f1p0/2300	[I]	Lipid transport and metabolism	Molecular Function: hydroxymethylglutaryl-CoA reductase (NADPH) activity (GO:0004420);; Cellular Component: nucleus (GO:0005634);; Biological Process: coenzyme A metabolic process (GO:0015936);; Cellular Component: integral component of membrane (GO:0016021);; Biological Process: triterpenoid biosynthetic process (GO:0016104);; Biological Process: sterol biosynthetic process (GO:0016126);; Molecu…	K00021|0|ath:AT2G17370|HMG2; 3-hydroxy-3-methylglutaryl-coenzyme A reductase 2; K00021 hydroxymethylglutaryl-CoA reductase (NADPH) [EC:1.1.1.34] (A)	ko00900:Terpenoid backbone biosynthesis	[I]	Lipid transport and metabolism	Hydroxymethylglutaryl-coenzyme A reductase;; Hydroxymethylglutaryl-coenzyme A reductase;; Hydroxymethylglutaryl-coenzyme A reductase	3-hydroxy-3-methylglutaryl-coenzyme A reductase 2 GN=F5J6.24 OS=Arabidopsis thaliana (Mouse-ear cress) PE=2 SV=1	I	Lipid transport and metabolism	3-hydroxy-3-methylglutaryl coenzyme A reductase 2 [Litchi chinensis]
F01_cb9137_c0/f1p0/2185	--	--	Biological Process: cellular process (GO:0009987);; Biological Process: protein maturation (GO:0051604);;	K08658|1.23816e-30|cam:101514895|CAAX prenyl protease 2-like; K08658 prenyl protein peptidase [EC:3.4.22.-] (A)	ko00900:Terpenoid backbone biosynthesis	[O]	Posttranslational modification, protein turnover, chaperones	--	CAAX prenyl protease 2 GN=F2H17 OS=Arabidopsis thaliana (Mouse-ear cress) PE=2 SV=2	O	Posttranslational modification, protein turnover, chaperones	hypothetical protein MIMGU_mgv1a010160mg [Erythranthe guttata]
F02_cb11041_c56691/f1p0/1768	[I]	Lipid transport and metabolism	Molecular Function: hydroxymethylglutaryl-CoA reductase (NADPH) activity (GO:0004420);; Cellular Component: endoplasmic reticulum membrane (GO:0005789);; Biological Process: isoprenoid biosynthetic process (GO:0008299);; Biological Process: coenzyme A metabolic process (GO:0015936);; Cellular Component: integral component of membrane (GO:0016021);; Molecular Function: NADP binding (GO:0050661);; …	K00021|0|sot:102599791|hmg1; 3-hydroxy-3-methylglutaryl-coenzyme A reductase 1-like; K00021 hydroxymethylglutaryl-CoA reductase (NADPH) [EC:1.1.1.34] (A)	ko00900:Terpenoid backbone biosynthesis	[I]	Lipid transport and metabolism	Hydroxymethylglutaryl-coenzyme A reductase	3-hydroxy-3-methylglutaryl-coenzyme A reductase OS=Camptotheca acuminata (Happy tree) PE=3 SV=1	I	Lipid transport and metabolism	hypothetical protein MIMGU_mgv1a003590mg [Erythranthe guttata]
F01_cb12076_c20/f6p1/1679	[O]	Posttranslational modification, protein turnover, chaperones	Molecular Function: metalloendopeptidase activity (GO:0004222);; Cellular Component: vacuole (GO:0005773);; Cellular Component: endoplasmic reticulum (GO:0005783);; Biological Process: proteolysis (GO:0006508);; Biological Process: ER to Golgi vesicle-mediated transport (GO:0006888);; Cellular Component: membrane (GO:0016020);; Biological Process: CAAX-box protein processing (GO:0071586);;	K06013|0|pop:POPTR_0014s08490g|POPTRDRAFT_664019; CAAX protease family protein; K06013 STE24 endopeptidase [EC:3.4.24.84] (A)	ko00900:Terpenoid backbone biosynthesis	[R]	General function prediction only	Peptidase family M48	CAAX prenyl protease 1 homolog OS=Arabidopsis thaliana (Mouse-ear cress) PE=1 SV=1	O	Posttranslational modification, protein turnover, chaperones	CAAX protease family protein [Populus trichocarpa]
F02_cb13834_c3/f2p0/969	[I]	Lipid transport and metabolism	Molecular Function: isopentenyl-diphosphate delta-isomerase activity (GO:0004452);; Biological Process: isoprenoid biosynthetic process (GO:0008299);; Biological Process: photosynthesis (GO:0015979);; Biological Process: chlorophyll biosynthetic process (GO:0015995);; Molecular Function: hydrolase activity (GO:0016787);; Molecular Function: metal ion binding (GO:0046872);; Biological Process: dim…	K01823|6.77475e-164|mdm:103414031|isopentenyl-diphosphate Delta-isomerase I-like; K01823 isopentenyl-diphosphate delta-isomerase [EC:5.3.3.2] (A)	ko00900:Terpenoid backbone biosynthesis	[Q]	Secondary metabolites biosynthesis, transport and catabolism	NUDIX domain	Isopentenyl-diphosphate Delta-isomerase II GN=IPI2 OS=Camptotheca acuminata (Happy tree) PE=2 SV=1	I	Lipid transport and metabolism	isopentenyl pyrophosphate isomerase [Salvia miltiorrhiza]
F01_cb9129_c2/f1p0/2188	[I]	Lipid transport and metabolism	Molecular Function: isopentenyl-diphosphate delta-isomerase activity (GO:0004452);; Biological Process: isoprenoid biosynthetic process (GO:0008299);; Cellular Component: chloroplast (GO:0009507);; Biological Process: photosynthesis (GO:0015979);; Biological Process: chlorophyll biosynthetic process (GO:0015995);; Molecular Function: hydrolase activity (GO:0016787);; Molecular Function: metal ion…	K01823|1.53009e-78|sly:100134905|IPI; isopentenyl diphosphate isomerase (EC:5.3.3.2); K01823 isopentenyl-diphosphate delta-isomerase [EC:5.3.3.2] (A)	ko00900:Terpenoid backbone biosynthesis	[Q]	Secondary metabolites biosynthesis, transport and catabolism	--	Isopentenyl-diphosphate Delta-isomerase II GN=IPI2 OS=Camptotheca acuminata (Happy tree) PE=2 SV=1	I	Lipid transport and metabolism	isopentenyl diphosphate isomerase [Ipomoea sp. Kenyan]
F01_cb3740_c6/f1p1/1900	[I]	Lipid transport and metabolism	Molecular Function: phosphomevalonate kinase activity (GO:0004631);; Molecular Function: ATP binding (GO:0005524);; Biological Process: sterol biosynthetic process (GO:0016126);; Biological Process: phosphorylation (GO:0016310);; Biological Process: pentacyclic triterpenoid biosynthetic process (GO:0019745);;	K00938|0|sly:101256682|probable phosphomevalonate kinase; K00938 phosphomevalonate kinase [EC:2.7.4.2] (A)	ko00900:Terpenoid backbone biosynthesis	[I]	Lipid transport and metabolism	GHMP kinases N terminal domain;; GHMP kinases C terminal	--	I	Lipid transport and metabolism	5-phosphomevalonate kinase [Salvia miltiorrhiza]
F01_cb16438_c13440/f1p0/1936	[I]	Lipid transport and metabolism	Molecular Function: hydroxymethylglutaryl-CoA reductase (NADPH) activity (GO:0004420);; Cellular Component: endoplasmic reticulum membrane (GO:0005789);; Biological Process: isoprenoid biosynthetic process (GO:0008299);; Biological Process: coenzyme A metabolic process (GO:0015936);; Cellular Component: integral component of membrane (GO:0016021);; Molecular Function: NADP binding (GO:0050661);; …	K00021|0|sot:102577899|3-hydroxy-3-methylglutaryl coenzyme A reductase; K00021 hydroxymethylglutaryl-CoA reductase (NADPH) [EC:1.1.1.34] (A)	ko00900:Terpenoid backbone biosynthesis	[I]	Lipid transport and metabolism	Hydroxymethylglutaryl-coenzyme A reductase	3-hydroxy-3-methylglutaryl-coenzyme A reductase OS=Camptotheca acuminata (Happy tree) PE=3 SV=1	I	Lipid transport and metabolism	hypothetical protein MIMGU_mgv1a003590mg [Erythranthe guttata]
F01_cb16438_c37815/f2p1/2739	[I]	Lipid transport and metabolism	Biological Process: sulfur amino acid metabolic process (GO:0000096);; Biological Process: MAPK cascade (GO:0000165);; Molecular Function: iron ion binding (GO:0005506);; Biological Process: pentose-phosphate shunt (GO:0006098);; Biological Process: regulation of translation (GO:0006417);; Biological Process: glycine catabolic process (GO:0006546);; Biological Process: protein targeting to membra…	K03526|0|gmx:100801743|4-hydroxy-3-methylbut-2-en-1-yl diphosphate synthase, chloroplastic-like; K03526 (E)-4-hydroxy-3-methylbut-2-enyl-diphosphate synthase [EC:1.17.7.1 1.17.7.3] (A)	ko00900:Terpenoid backbone biosynthesis	--	--	GcpE protein;; GcpE protein	4-hydroxy-3-methylbut-2-en-1-yl diphosphate synthase, chloroplastic (Precursor) GN=MUP24.2 OS=Arabidopsis thaliana (Mouse-ear cress) PE=1 SV=1	I	Lipid transport and metabolism	(E)-4-hydroxy-3-methylbut-2-enyl diphosphate synthase [Salvia miltiorrhiza f. alba]
F02_cb11041_c74783/f1p0/1883	[I]	Lipid transport and metabolism	Cellular Component: chloroplast stroma (GO:0009570);; Molecular Function: isomerase activity (GO:0016853);; Biological Process: isopentenyl diphosphate biosynthetic process, methylerythritol 4-phosphate pathway (GO:0019288);; Molecular Function: 1-deoxy-D-xylulose-5-phosphate reductoisomerase activity (GO:0030604);; Biological Process: response to cadmium ion (GO:0046686);; Molecular Function: me…	K00099|0|pop:POPTR_0012s08230g|POPTRDRAFT_728585; 1-deoxy-D-xylulose 5-phosphate reductoisomerase family protein; K00099 1-deoxy-D-xylulose-5-phosphate reductoisomerase [EC:1.1.1.267] (A)	ko00900:Terpenoid backbone biosynthesis	--	--	1-deoxy-D-xylulose 5-phosphate reductoisomerase;; DXP reductoisomerase C-terminal domain;; 1-deoxy-D-xylulose 5-phosphate reductoisomerase C-terminal	1-deoxy-D-xylulose 5-phosphate reductoisomerase, chloroplastic (Precursor) GN=DXR OS=Mentha piperita (Peppermint) PE=2 SV=2	I	Lipid transport and metabolism	1-deoxy-d-xylulose 5-phosphate reductoisomerase [Salvia miltiorrhiza]
F01_cb13703_c8/f1p0/1265	--	--	--	K11778|4.60387e-88|sot:102596985|nogo-B receptor-like; K11778 ditrans,polycis-polyprenyl diphosphate synthase [EC:2.5.1.87] (A)	ko00900:Terpenoid backbone biosynthesis	--	--	--	--	S	Function unknown	PREDICTED: dehydrodolichyl diphosphate syntase complex subunit nus1-like [Sesamum indicum]
F01_cb8417_c16/f1p0/1745	[I]	Lipid transport and metabolism	Molecular Function: diphosphomevalonate decarboxylase activity (GO:0004163);; Molecular Function: ATP binding (GO:0005524);; Biological Process: isoprenoid biosynthetic process (GO:0008299);; Molecular Function: protein homodimerization activity (GO:0042803);;	K01597|0|vvi:100251686|diphosphomevalonate decarboxylase; K01597 diphosphomevalonate decarboxylase [EC:4.1.1.33] (A)	ko00900:Terpenoid backbone biosynthesis	[I]	Lipid transport and metabolism	GHMP kinases N terminal domain	--	I	Lipid transport and metabolism	mevalonate diphosphate decarboxylase [Salvia miltiorrhiza]
F02_cb2495_c21/f1p0/1341	[I]	Lipid transport and metabolism	Molecular Function: transferase activity (GO:0016740);;	K11778|2.15448e-124|vvi:100251570|dehydrodolichyl diphosphate synthase 6-like; K11778 ditrans,polycis-polyprenyl diphosphate synthase [EC:2.5.1.87] (A)	ko00900:Terpenoid backbone biosynthesis	[I]	Lipid transport and metabolism	Putative undecaprenyl diphosphate synthase	Dehydrodolichyl diphosphate synthase 6 GN=At2g17570 OS=Arabidopsis thaliana (Mouse-ear cress) PE=2 SV=2	I	Lipid transport and metabolism	PREDICTED: dehydrodolichyl diphosphate synthase 6-like [Sesamum indicum]
F01_cb12383_c1/f1p0/1690	[O]	Posttranslational modification, protein turnover, chaperones	Molecular Function: prenyltransferase activity (GO:0004659);; Cellular Component: mitochondrion (GO:0005739);; Biological Process: response to abscisic acid (GO:0009737);; Biological Process: protein prenylation (GO:0018342);; Biological Process: single-organism cellular process (GO:0044763);; Biological Process: regulation of cellular process (GO:0050794);;	K05954|1.21229e-48|sbi:SORBI_03g034000|SORBIDRAFT_03g034000, Sb03g034000; hypothetical protein; K05954 protein farnesyltransferase subunit beta [EC:2.5.1.58] (A)	ko00900:Terpenoid backbone biosynthesis	[O]	Posttranslational modification, protein turnover, chaperones	Prenyltransferase and squalene oxidase repeat;; Prenyltransferase and squalene oxidase repeat;; Prenyltransferase and squalene oxidase repeat	Protein farnesyltransferase subunit beta GN=MSN9.20 OS=Arabidopsis thaliana (Mouse-ear cress) PE=1 SV=3	O	Posttranslational modification, protein turnover, chaperones	PREDICTED: protein farnesyltransferase subunit beta [Sesamum indicum]
F01_cb16438_c32837/f1p0/1776	[I]	Lipid transport and metabolism	Molecular Function: transferase activity (GO:0016740);;	K11778|1.04833e-99|vvi:100251570|dehydrodolichyl diphosphate synthase 6-like; K11778 ditrans,polycis-polyprenyl diphosphate synthase [EC:2.5.1.87] (A)	ko00900:Terpenoid backbone biosynthesis	[I]	Lipid transport and metabolism	Putative undecaprenyl diphosphate synthase;; Putative undecaprenyl diphosphate synthase	Rubber cis-polyprenyltransferase HRT2 GN=HRT2 OS=Hevea brasiliensis (Para rubber tree) PE=1 SV=1	I	Lipid transport and metabolism	hypothetical protein MIMGU_mgv1a011616mg [Erythranthe guttata]
F01_cb4189_c10/f1p0/2059	[H]	Coenzyme transport and metabolism	Molecular Function: dimethylallyltranstransferase activity (GO:0004161);; Molecular Function: farnesyltranstransferase activity (GO:0004311);; Molecular Function: geranyltranstransferase activity (GO:0004337);; Cellular Component: cytosol (GO:0005829);; Biological Process: acetyl-CoA metabolic process (GO:0006084);; Biological Process: polyamine catabolic process (GO:0006598);; Biological Process…	K00787|3.17308e-91|aly:ARALYDRAFT_493157|hypothetical protein; K00787 farnesyl diphosphate synthase [EC:2.5.1.1 2.5.1.10] (A)	ko00900:Terpenoid backbone biosynthesis	[H]	Coenzyme transport and metabolism	Polyprenyl synthetase;; Polyprenyl synthetase	Farnesyl pyrophosphate synthase 2 GN=FPS2 OS=Arabidopsis thaliana (Mouse-ear cress) PE=2 SV=1	H	Coenzyme transport and metabolism	farnesyl diphosphate synthase [Bacopa monnieri]
F02_cb9159_c5/f1p1/2128	[I]	Lipid transport and metabolism	Molecular Function: hydroxymethylglutaryl-CoA reductase (NADPH) activity (GO:0004420);; Biological Process: isoprenoid biosynthetic process (GO:0008299);; Biological Process: coenzyme A metabolic process (GO:0015936);; Cellular Component: integral component of membrane (GO:0016021);; Molecular Function: NADP binding (GO:0050661);; Biological Process: oxidation-reduction process (GO:0055114);;	K00021|0|rcu:RCOM_1602200|hmg-CoA reductase, putative (EC:1.1.1.34); K00021 hydroxymethylglutaryl-CoA reductase (NADPH) [EC:1.1.1.34] (A)	ko00900:Terpenoid backbone biosynthesis	[I]	Lipid transport and metabolism	Hydroxymethylglutaryl-coenzyme A reductase	3-hydroxy-3-methylglutaryl-coenzyme A reductase 1 GN=HMGR1 OS=Hevea brasiliensis (Para rubber tree) PE=2 SV=1	I	Lipid transport and metabolism	3-hydroxy-3-methylglutaryl-coenzyme A reductase [Salvia miltiorrhiza]
F01_cb16438_c32861/f1p0/2292	[IM]	--	Biological Process: isopentenyl diphosphate biosynthetic process, methylerythritol 4-phosphate pathway (GO:0019288);; Molecular Function: 4-hydroxy-3-methylbut-2-en-1-yl diphosphate reductase activity (GO:0051745);; Biological Process: oxidation-reduction process (GO:0055114);;	K03527|3.69951e-158|vvi:100267479|4-hydroxy-3-methylbut-2-enyl diphosphate reductase, chloroplastic; K03527 4-hydroxy-3-methylbut-2-enyl diphosphate reductase [EC:1.17.1.2] (A)	ko00900:Terpenoid backbone biosynthesis	--	--	LytB protein;; LytB protein;; LytB protein	4-hydroxy-3-methylbut-2-enyl diphosphate reductase, chloroplastic (Precursor) GN=F10M10.120 OS=Arabidopsis thaliana (Mouse-ear cress) PE=2 SV=1	I	Lipid transport and metabolism	PREDICTED: 4-hydroxy-3-methylbut-2-enyl diphosphate reductase, chloroplastic [Sesamum indicum]
F02_cb10218_c0/f5p0/1826	[H]	Coenzyme transport and metabolism	Molecular Function: dimethylallyltranstransferase activity (GO:0004161);; Biological Process: ubiquinone biosynthetic process (GO:0006744);; Biological Process: isoprenoid biosynthetic process (GO:0008299);; Cellular Component: chloroplast (GO:0009507);; Biological Process: embryo development (GO:0009790);; Molecular Function: trans-octaprenyltranstransferase activity (GO:0050347);;	K14066|0|sot:102588989|solanesyl diphosphate synthase 3, chloroplastic/mitochondrial-like; K14066 geranyl diphosphate synthase [EC:2.5.1.1] (A)	ko00900:Terpenoid backbone biosynthesis	[H]	Coenzyme transport and metabolism	Polyprenyl synthetase	Solanesyl diphosphate synthase 3, chloroplastic/mitochondrial (Precursor) GN=T31E10.3 OS=Arabidopsis thaliana (Mouse-ear cress) PE=1 SV=1	H	Coenzyme transport and metabolism	PREDICTED: solanesyl diphosphate synthase 3, chloroplastic/mitochondrial isoform X1 [Sesamum indicum]
F01_cb12302_c4/f2p0/1592	[IM]	--	Cellular Component: chloroplast stroma (GO:0009570);; Biological Process: isopentenyl diphosphate biosynthetic process, methylerythritol 4-phosphate pathway (GO:0019288);; Molecular Function: 4-hydroxy-3-methylbut-2-en-1-yl diphosphate synthase activity (GO:0046429);; Molecular Function: 4-hydroxy-3-methylbut-2-en-1-yl diphosphate reductase activity (GO:0051745);; Biological Process: oxidation-re…	K03527|0|gmx:100818067|4-hydroxy-3-methylbut-2-enyl diphosphate reductase, chloroplastic-like; K03527 4-hydroxy-3-methylbut-2-enyl diphosphate reductase [EC:1.17.1.2] (A)	ko00900:Terpenoid backbone biosynthesis	--	--	LytB protein	4-hydroxy-3-methylbut-2-enyl diphosphate reductase, chloroplastic (Precursor) GN=OSJNBa0079G12.18 OS=Oryza sativa subsp. japonica (Rice) PE=2 SV=1	I	Lipid transport and metabolism	4-hydroxy-3-methylbut-2-enyl diphosphate reductase [Morus notabilis]
F01_cb16438_c20265/f1p0/2277	[I]	Lipid transport and metabolism	Molecular Function: hydroxymethylglutaryl-CoA reductase (NADPH) activity (GO:0004420);; Cellular Component: endoplasmic reticulum membrane (GO:0005789);; Biological Process: isoprenoid biosynthetic process (GO:0008299);; Biological Process: coenzyme A metabolic process (GO:0015936);; Cellular Component: integral component of membrane (GO:0016021);; Molecular Function: NADP binding (GO:0050661);; …	K00021|0|vvi:100245191|3-hydroxy-3-methylglutaryl-coenzyme A reductase; K00021 hydroxymethylglutaryl-CoA reductase (NADPH) [EC:1.1.1.34] (A)	ko00900:Terpenoid backbone biosynthesis	[I]	Lipid transport and metabolism	Hydroxymethylglutaryl-coenzyme A reductase;; Hydroxymethylglutaryl-coenzyme A reductase;; Hydroxymethylglutaryl-coenzyme A reductase	3-hydroxy-3-methylglutaryl-coenzyme A reductase GN=HMGR OS=Nicotiana sylvestris (Wood tobacco) PE=2 SV=1	I	Lipid transport and metabolism	PREDICTED: LOW QUALITY PROTEIN: 3-hydroxy-3-methylglutaryl-coenzyme A reductase 1 [Eucalyptus grandis]
F02_cb9372_c1/f2p0/1990	[H]	Coenzyme transport and metabolism	Molecular Function: trans-hexaprenyltranstransferase activity (GO:0000010);; Biological Process: isoprenoid biosynthetic process (GO:0008299);; Biological Process: photosynthesis (GO:0015979);;	K05356|0|rcu:RCOM_1182760|solanesyl diphosphate synthase, putative (EC:2.5.1.30); K05356 all-trans-nonaprenyl-diphosphate synthase [EC:2.5.1.84 2.5.1.85] (A)	ko00900:Terpenoid backbone biosynthesis	[H]	Coenzyme transport and metabolism	Polyprenyl synthetase	Solanesyl diphosphate synthase 1 GN=T30F21.15 OS=Arabidopsis thaliana (Mouse-ear cress) PE=1 SV=1	H	Coenzyme transport and metabolism	PREDICTED: probable solanesyl-diphosphate synthase 3, chloroplastic isoform X1 [Sesamum indicum]
F01_cb14174_c5/f1p0/696	[I]	Lipid transport and metabolism	Cellular Component: mitochondrion (GO:0005739);; Molecular Function: 2-C-methyl-D-erythritol 2,4-cyclodiphosphate synthase activity (GO:0008685);; Cellular Component: chloroplast stroma (GO:0009570);; Biological Process: chlorophyll biosynthetic process (GO:0015995);; Biological Process: carotenoid biosynthetic process (GO:0016117);;	K01770|9.93296e-91|pop:POPTR_0003s13230g|POPTRDRAFT_1074087; hypothetical protein; K01770 2-C-methyl-D-erythritol 2,4-cyclodiphosphate synthase [EC:4.6.1.12] (A)	ko00900:Terpenoid backbone biosynthesis	--	--	YgbB family	2-C-methyl-D-erythritol 2,4-cyclodiphosphate synthase, chloroplastic (Precursor) GN=ISPF OS=Catharanthus roseus (Madagascar periwinkle) PE=2 SV=1	I	Lipid transport and metabolism	PREDICTED: 2-C-methyl-D-erythritol 2,4-cyclodiphosphate synthase, chloroplastic-like [Sesamum indicum]
F02_cb9159_c6/f1p0/2275	[I]	Lipid transport and metabolism	Molecular Function: hydroxymethylglutaryl-CoA reductase (NADPH) activity (GO:0004420);; Biological Process: isoprenoid biosynthetic process (GO:0008299);; Biological Process: coenzyme A metabolic process (GO:0015936);; Cellular Component: integral component of membrane (GO:0016021);; Molecular Function: NADP binding (GO:0050661);; Biological Process: oxidation-reduction process (GO:0055114);;	K00021|0|sot:102585007|3-hydroxy-3-methylglutaryl-coenzyme A reductase 1-like; K00021 hydroxymethylglutaryl-CoA reductase (NADPH) [EC:1.1.1.34] (A)	ko00900:Terpenoid backbone biosynthesis	[I]	Lipid transport and metabolism	Hydroxymethylglutaryl-coenzyme A reductase;; Hydroxymethylglutaryl-coenzyme A reductase	3-hydroxy-3-methylglutaryl-coenzyme A reductase 1 GN=HMGR1 OS=Hevea brasiliensis (Para rubber tree) PE=2 SV=1	I	Lipid transport and metabolism	3-hydroxy-3-methylglutaryl-coenzyme A reductase [Salvia miltiorrhiza]
F02_cb11041_c53754/f1p0/2484	[I]	Lipid transport and metabolism	Molecular Function: hydroxymethylglutaryl-CoA reductase (NADPH) activity (GO:0004420);; Cellular Component: endoplasmic reticulum membrane (GO:0005789);; Biological Process: isoprenoid biosynthetic process (GO:0008299);; Biological Process: coenzyme A metabolic process (GO:0015936);; Cellular Component: integral component of membrane (GO:0016021);; Molecular Function: NADP binding (GO:0050661);; …	K00021|0|sot:102577899|3-hydroxy-3-methylglutaryl coenzyme A reductase; K00021 hydroxymethylglutaryl-CoA reductase (NADPH) [EC:1.1.1.34] (A)	ko00900:Terpenoid backbone biosynthesis	[I]	Lipid transport and metabolism	Hydroxymethylglutaryl-coenzyme A reductase	3-hydroxy-3-methylglutaryl-coenzyme A reductase OS=Camptotheca acuminata (Happy tree) PE=3 SV=1	I	Lipid transport and metabolism	PREDICTED: 3-hydroxy-3-methylglutaryl-coenzyme A reductase [Sesamum indicum]
F01_cb16438_c32150/f3p0/1633	[IM]	--	Cellular Component: chloroplast stroma (GO:0009570);; Biological Process: isopentenyl diphosphate biosynthetic process, methylerythritol 4-phosphate pathway (GO:0019288);; Molecular Function: 4-hydroxy-3-methylbut-2-en-1-yl diphosphate synthase activity (GO:0046429);; Biological Process: response to antibiotic (GO:0046677);; Molecular Function: 4-hydroxy-3-methylbut-2-en-1-yl diphosphate reductas…	K03527|0|sly:100316901|ISPH protein; K03527 4-hydroxy-3-methylbut-2-enyl diphosphate reductase [EC:1.17.1.2] (A)	ko00900:Terpenoid backbone biosynthesis	--	--	LytB protein	4-hydroxy-3-methylbut-2-enyl diphosphate reductase, chloroplastic (Precursor) GN=F10M10.120 OS=Arabidopsis thaliana (Mouse-ear cress) PE=2 SV=1	I	Lipid transport and metabolism	PREDICTED: 4-hydroxy-3-methylbut-2-enyl diphosphate reductase, chloroplastic-like [Sesamum indicum]
F01_cb16438_c56225/f1p2/2164	[I]	Lipid transport and metabolism	Molecular Function: hydroxymethylglutaryl-CoA reductase (NADPH) activity (GO:0004420);; Cellular Component: endoplasmic reticulum membrane (GO:0005789);; Biological Process: isoprenoid biosynthetic process (GO:0008299);; Biological Process: coenzyme A metabolic process (GO:0015936);; Cellular Component: integral component of membrane (GO:0016021);; Molecular Function: NADP binding (GO:0050661);; …	K00021|0|sot:102577899|3-hydroxy-3-methylglutaryl coenzyme A reductase; K00021 hydroxymethylglutaryl-CoA reductase (NADPH) [EC:1.1.1.34] (A)	ko00900:Terpenoid backbone biosynthesis	[I]	Lipid transport and metabolism	Hydroxymethylglutaryl-coenzyme A reductase;; Hydroxymethylglutaryl-coenzyme A reductase	3-hydroxy-3-methylglutaryl-coenzyme A reductase OS=Camptotheca acuminata (Happy tree) PE=3 SV=1	I	Lipid transport and metabolism	HMG CoA reductase [Bacopa monnieri]
F02_cb10536_c10/f1p1/1805	[I]	Lipid transport and metabolism	Molecular Function: diphosphomevalonate decarboxylase activity (GO:0004163);; Molecular Function: ATP binding (GO:0005524);; Biological Process: isoprenoid biosynthetic process (GO:0008299);; Molecular Function: protein homodimerization activity (GO:0042803);;	K01597|0|vvi:100251686|diphosphomevalonate decarboxylase; K01597 diphosphomevalonate decarboxylase [EC:4.1.1.33] (A)	ko00900:Terpenoid backbone biosynthesis	[I]	Lipid transport and metabolism	GHMP kinases N terminal domain	--	I	Lipid transport and metabolism	mevalonate diphosphate decarboxylase [Salvia miltiorrhiza]
F01_cb4189_c19/f1p0/1347	[H]	Coenzyme transport and metabolism	Molecular Function: dimethylallyltranstransferase activity (GO:0004161);; Molecular Function: geranyltranstransferase activity (GO:0004337);; Biological Process: isoprenoid biosynthetic process (GO:0008299);;	K00787|0|cmo:103501295|farnesyl pyrophosphate synthase 1; K00787 farnesyl diphosphate synthase [EC:2.5.1.1 2.5.1.10] (A)	ko00900:Terpenoid backbone biosynthesis	[H]	Coenzyme transport and metabolism	Polyprenyl synthetase	Farnesyl pyrophosphate synthase 1 GN=FPS1 OS=Lupinus albus (White lupin) PE=2 SV=1	H	Coenzyme transport and metabolism	farnesyl diphosphate synthetase [Salvia miltiorrhiza]
F01_cb14612_c0/f1p0/864	[I]	Lipid transport and metabolism	Cellular Component: mitochondrion (GO:0005739);; Molecular Function: 2-C-methyl-D-erythritol 2,4-cyclodiphosphate synthase activity (GO:0008685);; Cellular Component: chloroplast stroma (GO:0009570);; Biological Process: chlorophyll biosynthetic process (GO:0015995);; Biological Process: carotenoid biosynthetic process (GO:0016117);;	K01770|2.05266e-115|pop:POPTR_0001s09860g|POPTRDRAFT_180213; hypothetical protein; K01770 2-C-methyl-D-erythritol 2,4-cyclodiphosphate synthase [EC:4.6.1.12] (A)	ko00900:Terpenoid backbone biosynthesis	--	--	YgbB family	2-C-methyl-D-erythritol 2,4-cyclodiphosphate synthase, chloroplastic (Precursor) GN=ISPF OS=Catharanthus roseus (Madagascar periwinkle) PE=2 SV=1	I	Lipid transport and metabolism	PREDICTED: 2-C-methyl-D-erythritol 2,4-cyclodiphosphate synthase, chloroplastic-like [Sesamum indicum]
F01_cb12383_c2/f1p0/2899	[O]	Posttranslational modification, protein turnover, chaperones	Molecular Function: transferase activity (GO:0016740);;	K05954|1.77616e-56|pvu:PHAVU_004G014500g|hypothetical protein; K05954 protein farnesyltransferase subunit beta [EC:2.5.1.58] (A)	ko00900:Terpenoid backbone biosynthesis	[O]	Posttranslational modification, protein turnover, chaperones	Prenyltransferase and squalene oxidase repeat;; Prenyltransferase and squalene oxidase repeat;; Prenyltransferase-like	Protein farnesyltransferase subunit beta GN=FTB OS=Pisum sativum (Garden pea) PE=1 SV=1	O	Posttranslational modification, protein turnover, chaperones	PREDICTED: protein farnesyltransferase subunit beta [Sesamum indicum]
F02_cb13678_c0/f2p0/1164	[I]	Lipid transport and metabolism	Biological Process: sulfur amino acid metabolic process (GO:0000096);; Biological Process: glycine catabolic process (GO:0006546);; Biological Process: unsaturated fatty acid biosynthetic process (GO:0006636);; Biological Process: oxidoreduction coenzyme metabolic process (GO:0006733);; Biological Process: vitamin metabolic process (GO:0006766);; Biological Process: cellular amino acid biosynthet…	K00991|1.28906e-143|sot:102588399|2-C-methyl-D-erythritol 4-phosphate cytidylyltransferase, chloroplastic-like; K00991 2-C-methyl-D-erythritol 4-phosphate cytidylyltransferase [EC:2.7.7.60] (A)	ko00900:Terpenoid backbone biosynthesis	--	--	2-C-methyl-D-erythritol 4-phosphate cytidylyltransferase;; MobA-like NTP transferase domain	2-C-methyl-D-erythritol 4-phosphate cytidylyltransferase, chloroplastic (Precursor) GN=T8K22.20 OS=Arabidopsis thaliana (Mouse-ear cress) PE=1 SV=1	I	Lipid transport and metabolism	hypothetical protein MIMGU_mgv1a010477mg [Erythranthe guttata]
F01_cb13079_c3/f1p0/1714	[H]	Coenzyme transport and metabolism	Molecular Function: dimethylallyltranstransferase activity (GO:0004161);; Molecular Function: farnesyltranstransferase activity (GO:0004311);; Molecular Function: geranyltranstransferase activity (GO:0004337);; Cellular Component: chloroplast (GO:0009507);; Biological Process: carotenoid biosynthetic process (GO:0016117);; Biological Process: geranyl diphosphate biosynthetic process (GO:0033384);…	K13789|7.24716e-178|mdm:103418313|geranylgeranyl pyrophosphate synthase, chloroplastic-like; K13789 geranylgeranyl diphosphate synthase, type II [EC:2.5.1.1 2.5.1.10 2.5.1.29] (A)	ko00900:Terpenoid backbone biosynthesis	[H]	Coenzyme transport and metabolism	Polyprenyl synthetase	Geranylgeranyl pyrophosphate synthase, chloroplastic (Precursor) GN=GGPS1 OS=Catharanthus roseus (Madagascar periwinkle) PE=3 SV=1	H	Coenzyme transport and metabolism	PREDICTED: geranylgeranyl pyrophosphate synthase, chloroplastic-like [Sesamum indicum]
F02_cb1130_c3/f1p0/1514	--	--	Biological Process: protein metabolic process (GO:0019538);;	K08658|2.91648e-42|vvi:100247667|CAAX prenyl protease 2; K08658 prenyl protein peptidase [EC:3.4.22.-] (A)	ko00900:Terpenoid backbone biosynthesis	[O]	Posttranslational modification, protein turnover, chaperones	CAAX protease self-immunity	CAAX prenyl protease 2 GN=F2H17 OS=Arabidopsis thaliana (Mouse-ear cress) PE=2 SV=2	O	Posttranslational modification, protein turnover, chaperones	PREDICTED: CAAX prenyl protease 2 [Sesamum indicum]
F01_cb16438_c38767/f1p0/2828	[I]	Lipid transport and metabolism	Biological Process: sulfur amino acid metabolic process (GO:0000096);; Biological Process: MAPK cascade (GO:0000165);; Molecular Function: iron ion binding (GO:0005506);; Biological Process: pentose-phosphate shunt (GO:0006098);; Biological Process: regulation of translation (GO:0006417);; Biological Process: glycine catabolic process (GO:0006546);; Biological Process: protein targeting to membra…	K03526|0|fve:101291219|4-hydroxy-3-methylbut-2-en-1-yl diphosphate synthase, chloroplastic-like; K03526 (E)-4-hydroxy-3-methylbut-2-enyl-diphosphate synthase [EC:1.17.7.1 1.17.7.3] (A)	ko00900:Terpenoid backbone biosynthesis	--	--	GcpE protein	4-hydroxy-3-methylbut-2-en-1-yl diphosphate synthase, chloroplastic (Precursor) GN=MUP24.2 OS=Arabidopsis thaliana (Mouse-ear cress) PE=1 SV=1	I	Lipid transport and metabolism	(E)-4-hydroxy-3-methylbut-2-enyl diphosphate synthase [Salvia miltiorrhiza f. alba]
F01_cb13079_c6/f1p0/1190	[H]	Coenzyme transport and metabolism	Molecular Function: dimethylallyltranstransferase activity (GO:0004161);; Molecular Function: farnesyltranstransferase activity (GO:0004311);; Molecular Function: geranyltranstransferase activity (GO:0004337);; Cellular Component: chloroplast (GO:0009507);; Biological Process: carotenoid biosynthetic process (GO:0016117);; Biological Process: geranyl diphosphate biosynthetic process (GO:0033384);…	K13789|1.71708e-178|mdm:103418313|geranylgeranyl pyrophosphate synthase, chloroplastic-like; K13789 geranylgeranyl diphosphate synthase, type II [EC:2.5.1.1 2.5.1.10 2.5.1.29] (A)	ko00900:Terpenoid backbone biosynthesis	[H]	Coenzyme transport and metabolism	Polyprenyl synthetase	Geranylgeranyl pyrophosphate synthase, chloroplastic (Precursor) GN=GGPS1 OS=Catharanthus roseus (Madagascar periwinkle) PE=3 SV=1	H	Coenzyme transport and metabolism	PREDICTED: geranylgeranyl pyrophosphate synthase, chloroplastic-like [Sesamum indicum]
F01_cb16438_c736/f6p0/2866	[I]	Lipid transport and metabolism	Molecular Function: iron ion binding (GO:0005506);; Biological Process: terpenoid biosynthetic process (GO:0016114);; Molecular Function: 4-hydroxy-3-methylbut-2-en-1-yl diphosphate synthase activity (GO:0046429);; Biological Process: oxidation-reduction process (GO:0055114);;	K03526|0|mdm:103413028|4-hydroxy-3-methylbut-2-en-1-yl diphosphate synthase, chloroplastic; K03526 (E)-4-hydroxy-3-methylbut-2-enyl-diphosphate synthase [EC:1.17.7.1 1.17.7.3] (A)	ko00900:Terpenoid backbone biosynthesis	--	--	GcpE protein	4-hydroxy-3-methylbut-2-en-1-yl diphosphate synthase, chloroplastic (Precursor) GN=MUP24.2 OS=Arabidopsis thaliana (Mouse-ear cress) PE=1 SV=1	I	Lipid transport and metabolism	(E)-4-hydroxy-3-methylbut-2-enyl diphosphate synthase [Salvia miltiorrhiza f. alba]
F01_cb9742_c7/f1p0/1887	[H]	Coenzyme transport and metabolism	Molecular Function: trans-hexaprenyltranstransferase activity (GO:0000010);; Molecular Function: dimethylallyltranstransferase activity (GO:0004161);; Biological Process: ubiquinone biosynthetic process (GO:0006744);; Biological Process: isoprenoid biosynthetic process (GO:0008299);; Cellular Component: chloroplast (GO:0009507);; Biological Process: embryo development (GO:0009790);; Molecular Fun…	K14066|0|sot:102588989|solanesyl diphosphate synthase 3, chloroplastic/mitochondrial-like; K14066 geranyl diphosphate synthase [EC:2.5.1.1] (A)	ko00900:Terpenoid backbone biosynthesis	[H]	Coenzyme transport and metabolism	Polyprenyl synthetase	Solanesyl-diphosphate synthase 1, mitochondrial (Precursor) GN=SPS1 OS=Oryza sativa subsp. japonica (Rice) PE=1 SV=1	H	Coenzyme transport and metabolism	PREDICTED: solanesyl diphosphate synthase 3, chloroplastic/mitochondrial isoform X1 [Sesamum indicum]
F02_cb8613_c8/f1p0/1828	[H]	Coenzyme transport and metabolism	Molecular Function: trans-hexaprenyltranstransferase activity (GO:0000010);; Molecular Function: dimethylallyltranstransferase activity (GO:0004161);; Biological Process: isoprenoid biosynthetic process (GO:0008299);;	K14066|1.56957e-148|rcu:RCOM_0747390|geranylgeranyl pyrophosphate synthase, putative (EC:2.5.1.30); K14066 geranyl diphosphate synthase [EC:2.5.1.1] (A)	ko00900:Terpenoid backbone biosynthesis	[H]	Coenzyme transport and metabolism	Polyprenyl synthetase;; Polyprenyl synthetase	Solanesyl diphosphate synthase 3, chloroplastic/mitochondrial (Precursor) GN=T31E10.3 OS=Arabidopsis thaliana (Mouse-ear cress) PE=1 SV=1	H	Coenzyme transport and metabolism	PREDICTED: solanesyl diphosphate synthase 3, chloroplastic/mitochondrial isoform X1 [Sesamum indicum]
F01_cb16438_c43266/f1p0/3532	[I]	Lipid transport and metabolism	Molecular Function: transferase activity, transferring alkyl or aryl (other than methyl) groups (GO:0016765);;	K11778|2.99049e-85|pmum:103334495|dehydrodolichyl diphosphate synthase 6-like; K11778 ditrans,polycis-polyprenyl diphosphate synthase [EC:2.5.1.87] (A)	ko00900:Terpenoid backbone biosynthesis	[I]	Lipid transport and metabolism	Putative undecaprenyl diphosphate synthase	Dehydrodolichyl diphosphate synthase 6 GN=At2g17570 OS=Arabidopsis thaliana (Mouse-ear cress) PE=2 SV=2	I	Lipid transport and metabolism	hypothetical protein MIMGU_mgv1a011616mg [Erythranthe guttata]
F01_cb16438_c38736/f4p8/2670	[I]	Lipid transport and metabolism	Molecular Function: iron ion binding (GO:0005506);; Biological Process: terpenoid biosynthetic process (GO:0016114);; Molecular Function: 4-hydroxy-3-methylbut-2-en-1-yl diphosphate synthase activity (GO:0046429);; Biological Process: oxidation-reduction process (GO:0055114);;	K03526|0|mdm:103413028|4-hydroxy-3-methylbut-2-en-1-yl diphosphate synthase, chloroplastic; K03526 (E)-4-hydroxy-3-methylbut-2-enyl-diphosphate synthase [EC:1.17.7.1 1.17.7.3] (A)	ko00900:Terpenoid backbone biosynthesis	--	--	GcpE protein	4-hydroxy-3-methylbut-2-en-1-yl diphosphate synthase, chloroplastic (Precursor) GN=MUP24.2 OS=Arabidopsis thaliana (Mouse-ear cress) PE=1 SV=1	I	Lipid transport and metabolism	(E)-4-hydroxy-3-methylbut-2-enyl diphosphate synthase [Salvia miltiorrhiza f. alba]
F02_cb10536_c14/f14p2/1571	[I]	Lipid transport and metabolism	Molecular Function: diphosphomevalonate decarboxylase activity (GO:0004163);; Molecular Function: ATP binding (GO:0005524);; Biological Process: isoprenoid biosynthetic process (GO:0008299);; Molecular Function: protein homodimerization activity (GO:0042803);;	K01597|0|vvi:100251686|diphosphomevalonate decarboxylase; K01597 diphosphomevalonate decarboxylase [EC:4.1.1.33] (A)	ko00900:Terpenoid backbone biosynthesis	[I]	Lipid transport and metabolism	GHMP kinases N terminal domain	--	I	Lipid transport and metabolism	mevalonate diphosphate decarboxylase [Salvia miltiorrhiza]
F02_cb7697_c27/f1p0/1529	[IM]	--	Cellular Component: chloroplast stroma (GO:0009570);; Biological Process: isopentenyl diphosphate biosynthetic process, methylerythritol 4-phosphate pathway (GO:0019288);; Molecular Function: 4-hydroxy-3-methylbut-2-en-1-yl diphosphate synthase activity (GO:0046429);; Biological Process: response to antibiotic (GO:0046677);; Molecular Function: 4-hydroxy-3-methylbut-2-en-1-yl diphosphate reductas…	K03527|0|pop:POPTR_0009s11480g|POPTRDRAFT_557296; chloroplast biogenesis family protein; K03527 4-hydroxy-3-methylbut-2-enyl diphosphate reductase [EC:1.17.1.2] (A)	ko00900:Terpenoid backbone biosynthesis	--	--	LytB protein;; LytB protein	4-hydroxy-3-methylbut-2-enyl diphosphate reductase, chloroplastic (Precursor) GN=OSJNBa0079G12.18 OS=Oryza sativa subsp. japonica (Rice) PE=2 SV=1	I	Lipid transport and metabolism	4-hydroxy-3-methylbut-2-enyl diphosphate reductase [Picrorhiza kurrooa]
F01_cb9135_c2/f1p0/1313	[I]	Lipid transport and metabolism	Biological Process: isoprenoid biosynthetic process (GO:0008299);; Molecular Function: 2-C-methyl-D-erythritol 4-phosphate cytidylyltransferase activity (GO:0050518);;	K00991|1.27264e-138|cit:102612633|2-C-methyl-D-erythritol 4-phosphate cytidylyltransferase, chloroplastic-like; K00991 2-C-methyl-D-erythritol 4-phosphate cytidylyltransferase [EC:2.7.7.60] (A)	ko00900:Terpenoid backbone biosynthesis	--	--	2-C-methyl-D-erythritol 4-phosphate cytidylyltransferase;; MobA-like NTP transferase domain	2-C-methyl-D-erythritol 4-phosphate cytidylyltransferase, chloroplastic (Precursor) GN=T8K22.20 OS=Arabidopsis thaliana (Mouse-ear cress) PE=1 SV=1	I	Lipid transport and metabolism	PREDICTED: 2-C-methyl-D-erythritol 4-phosphate cytidylyltransferase, chloroplastic isoform X2 [Sesamum indicum]
F01_cb9129_c7/f1p0/1182	[I]	Lipid transport and metabolism	Molecular Function: isopentenyl-diphosphate delta-isomerase activity (GO:0004452);; Biological Process: isoprenoid biosynthetic process (GO:0008299);; Biological Process: photosynthesis (GO:0015979);; Biological Process: chlorophyll biosynthetic process (GO:0015995);; Molecular Function: hydrolase activity (GO:0016787);; Molecular Function: metal ion binding (GO:0046872);; Biological Process: dim…	K01823|3.33919e-123|mdm:103419532|isopentenyl-diphosphate Delta-isomerase I; K01823 isopentenyl-diphosphate delta-isomerase [EC:5.3.3.2] (A)	ko00900:Terpenoid backbone biosynthesis	[Q]	Secondary metabolites biosynthesis, transport and catabolism	NUDIX domain	Isopentenyl-diphosphate Delta-isomerase I GN=IPI1 OS=Camptotheca acuminata (Happy tree) PE=2 SV=1	I	Lipid transport and metabolism	isopentenyl diphosphate isomerase 2 [Panax notoginseng]
F01_cb15591_c1/f1p0/1508	[IM]	--	Cellular Component: chloroplast stroma (GO:0009570);; Biological Process: terpenoid biosynthetic process (GO:0016114);; Biological Process: isopentenyl diphosphate biosynthetic process, methylerythritol 4-phosphate pathway (GO:0019288);; Molecular Function: 4-hydroxy-3-methylbut-2-en-1-yl diphosphate synthase activity (GO:0046429);; Molecular Function: metal ion binding (GO:0046872);; Biological …	K03527|1.83481e-165|osa:4334003|Os03g0731900; K03527 4-hydroxy-3-methylbut-2-enyl diphosphate reductase [EC:1.17.1.2] (A)	ko00900:Terpenoid backbone biosynthesis	--	--	LytB protein;; LytB protein;; LytB protein	4-hydroxy-3-methylbut-2-enyl diphosphate reductase, chloroplastic (Precursor) GN=OSJNBa0079G12.18 OS=Oryza sativa subsp. japonica (Rice) PE=2 SV=1	I	Lipid transport and metabolism	unknown [Lotus japonicus]
F01_cb9071_c4/f1p0/2243	[I]	Lipid transport and metabolism	Molecular Function: catalytic activity (GO:0003824);; Biological Process: cellular biosynthetic process (GO:0044249);; Biological Process: single-organism metabolic process (GO:0044710);; Biological Process: organic substance biosynthetic process (GO:1901576);;	K01823|9.68833e-117|sot:102580973|isopentenyl-diphosphate Delta-isomerase II-like; K01823 isopentenyl-diphosphate delta-isomerase [EC:5.3.3.2] (A)	ko00900:Terpenoid backbone biosynthesis	[Q]	Secondary metabolites biosynthesis, transport and catabolism	NUDIX domain;; NUDIX domain	Isopentenyl-diphosphate Delta-isomerase I GN=IPI1 OS=Camptotheca acuminata (Happy tree) PE=2 SV=1	I	Lipid transport and metabolism	isopentenyl-diphosphate isomerase [Humulus lupulus]
F02_cb13834_c6/f1p0/1060	[I]	Lipid transport and metabolism	Molecular Function: isopentenyl-diphosphate delta-isomerase activity (GO:0004452);; Biological Process: isoprenoid biosynthetic process (GO:0008299);; Biological Process: photosynthesis (GO:0015979);; Biological Process: chlorophyll biosynthetic process (GO:0015995);; Molecular Function: hydrolase activity (GO:0016787);; Molecular Function: metal ion binding (GO:0046872);; Biological Process: dim…	K01823|1.00932e-162|mdm:103414031|isopentenyl-diphosphate Delta-isomerase I-like; K01823 isopentenyl-diphosphate delta-isomerase [EC:5.3.3.2] (A)	ko00900:Terpenoid backbone biosynthesis	[Q]	Secondary metabolites biosynthesis, transport and catabolism	NUDIX domain	Isopentenyl-diphosphate Delta-isomerase II GN=IPI2 OS=Camptotheca acuminata (Happy tree) PE=2 SV=1	I	Lipid transport and metabolism	isopentenyl pyrophosphate isomerase [Salvia miltiorrhiza]
F02_cb1116_c1/f1p0/1818	[I]	Lipid transport and metabolism	--	K11778|1.37859e-80|sly:101244138|dehydrodolichyl diphosphate synthase 2-like; K11778 ditrans,polycis-polyprenyl diphosphate synthase [EC:2.5.1.87] (A)	ko00900:Terpenoid backbone biosynthesis	[I]	Lipid transport and metabolism	Putative undecaprenyl diphosphate synthase;; Putative undecaprenyl diphosphate synthase	Dehydrodolichyl diphosphate synthase 2 GN=At5g58770 OS=Arabidopsis thaliana (Mouse-ear cress) PE=2 SV=2	I	Lipid transport and metabolism	PREDICTED: dehydrodolichyl diphosphate synthase 2-like [Sesamum indicum]
F01_cb17470_c7/f1p1/1053	[I]	Lipid transport and metabolism	Molecular Function: hydroxymethylglutaryl-CoA reductase (NADPH) activity (GO:0004420);; Biological Process: coenzyme A metabolic process (GO:0015936);; Molecular Function: coenzyme binding (GO:0050662);; Biological Process: oxidation-reduction process (GO:0055114);;	K00021|8.78908e-65|cit:102609952|3-hydroxy-3-methylglutaryl-coenzyme A reductase 1-like; K00021 hydroxymethylglutaryl-CoA reductase (NADPH) [EC:1.1.1.34] (A)	ko00900:Terpenoid backbone biosynthesis	[I]	Lipid transport and metabolism	Hydroxymethylglutaryl-coenzyme A reductase;; Hydroxymethylglutaryl-coenzyme A reductase;; Hydroxymethylglutaryl-coenzyme A reductase	3-hydroxy-3-methylglutaryl-coenzyme A reductase 2 (Fragment) GN=HMGR2 OS=Hevea brasiliensis (Para rubber tree) PE=2 SV=1	I	Lipid transport and metabolism	hydroxy-methyl-glutaryl-coenzyme A reductase [Bacopa monnieri]
F01_cb12873_c2/f2p0/1638	[I]	Lipid transport and metabolism	Molecular Function: transferase activity, transferring alkyl or aryl (other than methyl) groups (GO:0016765);;	K11778|3.41477e-135|pmum:103334495|dehydrodolichyl diphosphate synthase 6-like; K11778 ditrans,polycis-polyprenyl diphosphate synthase [EC:2.5.1.87] (A)	ko00900:Terpenoid backbone biosynthesis	[I]	Lipid transport and metabolism	Putative undecaprenyl diphosphate synthase	Dehydrodolichyl diphosphate synthase 6 GN=At2g17570 OS=Arabidopsis thaliana (Mouse-ear cress) PE=2 SV=2	I	Lipid transport and metabolism	PREDICTED: dehydrodolichyl diphosphate synthase 6 [Sesamum indicum]
F01_cb3740_c13/f1p0/793	--	--	Molecular Function: phosphomevalonate kinase activity (GO:0004631);; Molecular Function: ATP binding (GO:0005524);; Biological Process: phosphorylation (GO:0016310);;	K00938|9.23047e-25|pop:POPTR_0003s09680g|POPTRDRAFT_712033; GHMP kinase family protein; K00938 phosphomevalonate kinase [EC:2.7.4.2] (A)	ko00900:Terpenoid backbone biosynthesis	[I]	Lipid transport and metabolism	--	--	I	Lipid transport and metabolism	PREDICTED: phosphomevalonate kinase [Sesamum indicum]
F02_cb4839_c12/f1p0/1090	[H]	Coenzyme transport and metabolism	Molecular Function: dimethylallyltranstransferase activity (GO:0004161);; Molecular Function: geranyltranstransferase activity (GO:0004337);; Biological Process: isoprenoid biosynthetic process (GO:0008299);;	K00787|6.19854e-105|cic:CICLE_v10008832mg|hypothetical protein; K00787 farnesyl diphosphate synthase [EC:2.5.1.1 2.5.1.10] (A)	ko00900:Terpenoid backbone biosynthesis	[H]	Coenzyme transport and metabolism	Polyprenyl synthetase;; Polyprenyl synthetase	(2E,6E)-farnesyl diphosphate synthase GN=FDS-1 OS=Artemisia spiciformis (Spiked big sagebrush) PE=1 SV=1	H	Coenzyme transport and metabolism	farnesyl diphosphate synthetase [Salvia miltiorrhiza]
F02_cb9580_c3/f1p2/1944	--	--	Biological Process: cellular metabolic process (GO:0044237);;	K05906|2.63523e-96|pvu:PHAVU_009G154600g|hypothetical protein; K05906 prenylcysteine oxidase / farnesylcysteine lyase [EC:1.8.3.5 1.8.3.6] (A)	ko00900:Terpenoid backbone biosynthesis	--	--	Prenylcysteine lyase;; Prenylcysteine lyase;; Prenylcysteine lyase	Farnesylcysteine lyase (Precursor) GN=FLCY OS=Arabidopsis thaliana (Mouse-ear cress) PE=1 SV=1	O	Posttranslational modification, protein turnover, chaperones	PREDICTED: farnesylcysteine lyase [Sesamum indicum]
F01_cb8417_c13/f1p0/2125	[I]	Lipid transport and metabolism	Molecular Function: diphosphomevalonate decarboxylase activity (GO:0004163);; Molecular Function: ATP binding (GO:0005524);; Biological Process: isoprenoid biosynthetic process (GO:0008299);;	K01597|5.72143e-83|vvi:100251686|diphosphomevalonate decarboxylase; K01597 diphosphomevalonate decarboxylase [EC:4.1.1.33] (A)	ko00900:Terpenoid backbone biosynthesis	[I]	Lipid transport and metabolism	GHMP kinases N terminal domain	--	I	Lipid transport and metabolism	hypothetical protein MIMGU_mgv1a007068mg [Erythranthe guttata]
F01_cb9071_c3/f1p0/2212	[I]	Lipid transport and metabolism	Molecular Function: catalytic activity (GO:0003824);; Biological Process: cellular biosynthetic process (GO:0044249);; Biological Process: single-organism metabolic process (GO:0044710);; Biological Process: organic substance biosynthetic process (GO:1901576);;	K01823|1.36977e-98|sot:102580973|isopentenyl-diphosphate Delta-isomerase II-like; K01823 isopentenyl-diphosphate delta-isomerase [EC:5.3.3.2] (A)	ko00900:Terpenoid backbone biosynthesis	[Q]	Secondary metabolites biosynthesis, transport and catabolism	NUDIX domain;; NUDIX domain	Isopentenyl-diphosphate Delta-isomerase I GN=IPI1 OS=Camptotheca acuminata (Happy tree) PE=2 SV=1	I	Lipid transport and metabolism	isopentenyl-diphosphate isomerase [Humulus lupulus]
F01_cb8417_c10/f1p0/2083	[I]	Lipid transport and metabolism	Molecular Function: diphosphomevalonate decarboxylase activity (GO:0004163);; Molecular Function: ATP binding (GO:0005524);; Biological Process: isoprenoid biosynthetic process (GO:0008299);; Molecular Function: protein homodimerization activity (GO:0042803);;	K01597|3.47124e-151|pop:POPTR_0010s24440g|POPTRDRAFT_660167; mevalonate disphosphate decarboxylase family protein; K01597 diphosphomevalonate decarboxylase [EC:4.1.1.33] (A)	ko00900:Terpenoid backbone biosynthesis	[I]	Lipid transport and metabolism	--	--	I	Lipid transport and metabolism	mevalonate diphosphate decarboxylase [Salvia miltiorrhiza]
F01_cb16438_c36571/f1p0/1642	[I]	Lipid transport and metabolism	--	K11778|4.3921e-70|vvi:100251570|dehydrodolichyl diphosphate synthase 6-like; K11778 ditrans,polycis-polyprenyl diphosphate synthase [EC:2.5.1.87] (A)	ko00900:Terpenoid backbone biosynthesis	[I]	Lipid transport and metabolism	Putative undecaprenyl diphosphate synthase	Dehydrodolichyl diphosphate synthase 6 GN=At2g17570 OS=Arabidopsis thaliana (Mouse-ear cress) PE=2 SV=2	I	Lipid transport and metabolism	PREDICTED: dehydrodolichyl diphosphate synthase 6-like [Sesamum indicum]
F01_cb12383_c0/f1p0/1727	[O]	Posttranslational modification, protein turnover, chaperones	Molecular Function: prenyltransferase activity (GO:0004659);; Biological Process: response to abscisic acid (GO:0009737);; Biological Process: protein prenylation (GO:0018342);; Biological Process: single-organism cellular process (GO:0044763);; Biological Process: regulation of cellular process (GO:0050794);;	K05954|0|vvi:100266301|protein farnesyltransferase subunit beta; K05954 protein farnesyltransferase subunit beta [EC:2.5.1.58] (A)	ko00900:Terpenoid backbone biosynthesis	[O]	Posttranslational modification, protein turnover, chaperones	Prenyltransferase and squalene oxidase repeat;; Prenyltransferase-like;; Prenyltransferase-like	Protein farnesyltransferase subunit beta GN=FTB OS=Pisum sativum (Garden pea) PE=1 SV=1	O	Posttranslational modification, protein turnover, chaperones	PREDICTED: protein farnesyltransferase subunit beta [Sesamum indicum]
F01_cb16438_c39569/f1p0/2697	[I]	Lipid transport and metabolism	Molecular Function: iron ion binding (GO:0005506);; Biological Process: terpenoid biosynthetic process (GO:0016114);; Molecular Function: 4-hydroxy-3-methylbut-2-en-1-yl diphosphate synthase activity (GO:0046429);; Biological Process: oxidation-reduction process (GO:0055114);;	K03526|0|mdm:103413028|4-hydroxy-3-methylbut-2-en-1-yl diphosphate synthase, chloroplastic; K03526 (E)-4-hydroxy-3-methylbut-2-enyl-diphosphate synthase [EC:1.17.7.1 1.17.7.3] (A)	ko00900:Terpenoid backbone biosynthesis	--	--	GcpE protein	4-hydroxy-3-methylbut-2-en-1-yl diphosphate synthase, chloroplastic (Precursor) GN=MUP24.2 OS=Arabidopsis thaliana (Mouse-ear cress) PE=1 SV=1	I	Lipid transport and metabolism	(E)-4-hydroxy-3-methylbut-2-enyl diphosphate synthase [Salvia miltiorrhiza f. alba]
F02_cb3574_c4/f1p0/3089	[O]	Posttranslational modification, protein turnover, chaperones	Molecular Function: metalloendopeptidase activity (GO:0004222);; Cellular Component: vacuole (GO:0005773);; Cellular Component: endoplasmic reticulum (GO:0005783);; Biological Process: proteolysis (GO:0006508);; Cellular Component: membrane (GO:0016020);; Biological Process: CAAX-box protein processing (GO:0071586);;	K06013|6.7308e-88|mus:103984888|CAAX prenyl protease 1 homolog; K06013 STE24 endopeptidase [EC:3.4.24.84] (A)	ko00900:Terpenoid backbone biosynthesis	[R]	General function prediction only	--	CAAX prenyl protease 1 homolog OS=Arabidopsis thaliana (Mouse-ear cress) PE=1 SV=1	O	Posttranslational modification, protein turnover, chaperones	BnaA03g26940D [Brassica napus]
F02_cb2495_c25/f3p0/1519	[I]	Lipid transport and metabolism	Molecular Function: transferase activity, transferring alkyl or aryl (other than methyl) groups (GO:0016765);;	K11778|1.16599e-131|vvi:100251570|dehydrodolichyl diphosphate synthase 6-like; K11778 ditrans,polycis-polyprenyl diphosphate synthase [EC:2.5.1.87] (A)	ko00900:Terpenoid backbone biosynthesis	[I]	Lipid transport and metabolism	Putative undecaprenyl diphosphate synthase	Dehydrodolichyl diphosphate synthase 6 GN=At2g17570 OS=Arabidopsis thaliana (Mouse-ear cress) PE=2 SV=2	I	Lipid transport and metabolism	PREDICTED: dehydrodolichyl diphosphate synthase 6-like [Sesamum indicum]
F02_cb10536_c15/f4p2/1704	[I]	Lipid transport and metabolism	Molecular Function: diphosphomevalonate decarboxylase activity (GO:0004163);; Molecular Function: ATP binding (GO:0005524);; Biological Process: isoprenoid biosynthetic process (GO:0008299);; Molecular Function: protein homodimerization activity (GO:0042803);;	K01597|0|vvi:100251686|diphosphomevalonate decarboxylase; K01597 diphosphomevalonate decarboxylase [EC:4.1.1.33] (A)	ko00900:Terpenoid backbone biosynthesis	[I]	Lipid transport and metabolism	GHMP kinases N terminal domain	--	I	Lipid transport and metabolism	mevalonate diphosphate decarboxylase [Salvia miltiorrhiza]
F01_cb17402_c3/f1p1/1319	[H]	Coenzyme transport and metabolism	Biological Process: isoprenoid biosynthetic process (GO:0008299);; Molecular Function: transferase activity (GO:0016740);; Molecular Function: 2-alkenal reductase [NAD(P)] activity (GO:0032440);; Biological Process: oxidation-reduction process (GO:0055114);;	K13789|1.77164e-167|sly:101246371|heterodimeric geranylgeranyl pyrophosphate synthase small subunit, chloroplastic-like; K13789 geranylgeranyl diphosphate synthase, type II [EC:2.5.1.1 2.5.1.10 2.5.1.29] (A)	ko00900:Terpenoid backbone biosynthesis	[H]	Coenzyme transport and metabolism	Polyprenyl synthetase	Heterodimeric geranylgeranyl pyrophosphate synthase small subunit, chloroplastic (Precursor) GN=GGR OS=Arabidopsis thaliana (Mouse-ear cress) PE=1 SV=2	H	Coenzyme transport and metabolism	geranyl diphosphate synthase small subunit type II.2 [Salvia miltiorrhiza]
F01_cb11562_c2/f1p0/1770	[I]	Lipid transport and metabolism	Biological Process: maltose metabolic process (GO:0000023);; Biological Process: sulfur amino acid metabolic process (GO:0000096);; Biological Process: pentose-phosphate shunt (GO:0006098);; Biological Process: glycine catabolic process (GO:0006546);; Biological Process: unsaturated fatty acid biosynthetic process (GO:0006636);; Biological Process: phosphatidylglycerol biosynthetic process (GO:00…	K00099|0|vvi:100248516|1-deoxy-D-xylulose 5-phosphate reductoisomerase, chloroplastic; K00099 1-deoxy-D-xylulose-5-phosphate reductoisomerase [EC:1.1.1.267] (A)	ko00900:Terpenoid backbone biosynthesis	--	--	1-deoxy-D-xylulose 5-phosphate reductoisomerase;; DXP reductoisomerase C-terminal domain;; 1-deoxy-D-xylulose 5-phosphate reductoisomerase C-terminal	1-deoxy-D-xylulose 5-phosphate reductoisomerase, chloroplastic (Precursor) GN=MQB2.11 OS=Arabidopsis thaliana (Mouse-ear cress) PE=2 SV=2	I	Lipid transport and metabolism	1-deoxy-D-xylulose 5-phosphate reductoisomerase [Morus notabilis]
F01_cb16438_c15069/f1p1/2261	[I]	Lipid transport and metabolism	Molecular Function: hydroxymethylglutaryl-CoA reductase (NADPH) activity (GO:0004420);; Cellular Component: endoplasmic reticulum membrane (GO:0005789);; Biological Process: isoprenoid biosynthetic process (GO:0008299);; Biological Process: coenzyme A metabolic process (GO:0015936);; Cellular Component: integral component of membrane (GO:0016021);; Molecular Function: NADP binding (GO:0050661);; …	K00021|0|sot:102577899|3-hydroxy-3-methylglutaryl coenzyme A reductase; K00021 hydroxymethylglutaryl-CoA reductase (NADPH) [EC:1.1.1.34] (A)	ko00900:Terpenoid backbone biosynthesis	[I]	Lipid transport and metabolism	Hydroxymethylglutaryl-coenzyme A reductase	3-hydroxy-3-methylglutaryl-coenzyme A reductase OS=Camptotheca acuminata (Happy tree) PE=3 SV=1	I	Lipid transport and metabolism	PREDICTED: 3-hydroxy-3-methylglutaryl-coenzyme A reductase [Sesamum indicum]
F01_cb16438_c23194/f1p1/2288	[I]	Lipid transport and metabolism	Molecular Function: hydroxymethylglutaryl-CoA reductase (NADPH) activity (GO:0004420);; Cellular Component: endoplasmic reticulum membrane (GO:0005789);; Biological Process: isoprenoid biosynthetic process (GO:0008299);; Biological Process: coenzyme A metabolic process (GO:0015936);; Cellular Component: integral component of membrane (GO:0016021);; Molecular Function: NADP binding (GO:0050661);; …	K00021|0|sot:102577899|3-hydroxy-3-methylglutaryl coenzyme A reductase; K00021 hydroxymethylglutaryl-CoA reductase (NADPH) [EC:1.1.1.34] (A)	ko00900:Terpenoid backbone biosynthesis	[I]	Lipid transport and metabolism	Hydroxymethylglutaryl-coenzyme A reductase	3-hydroxy-3-methylglutaryl-coenzyme A reductase OS=Camptotheca acuminata (Happy tree) PE=3 SV=1	I	Lipid transport and metabolism	hypothetical protein MIMGU_mgv1a003590mg [Erythranthe guttata]
F01_cb16438_c43519/f1p0/2051	[I]	Lipid transport and metabolism	Molecular Function: hydroxymethylglutaryl-CoA reductase (NADPH) activity (GO:0004420);; Cellular Component: endoplasmic reticulum membrane (GO:0005789);; Biological Process: isoprenoid biosynthetic process (GO:0008299);; Biological Process: coenzyme A metabolic process (GO:0015936);; Cellular Component: integral component of membrane (GO:0016021);; Molecular Function: NADP binding (GO:0050661);; …	K00021|0|cmo:103502601|Cm-HMGR, HMG-CoA; 3-hydroxy-3-methylglutaryl-coenzyme A reductase 1 (EC:1.1.1.34); K00021 hydroxymethylglutaryl-CoA reductase (NADPH) [EC:1.1.1.34] (A)	ko00900:Terpenoid backbone biosynthesis	[I]	Lipid transport and metabolism	Hydroxymethylglutaryl-coenzyme A reductase	3-hydroxy-3-methylglutaryl-coenzyme A reductase OS=Camptotheca acuminata (Happy tree) PE=3 SV=1	I	Lipid transport and metabolism	PREDICTED: 3-hydroxy-3-methylglutaryl-coenzyme A reductase [Sesamum indicum]
F01_cb12076_c7/f1p0/1739	[O]	Posttranslational modification, protein turnover, chaperones	Molecular Function: metalloendopeptidase activity (GO:0004222);; Cellular Component: vacuole (GO:0005773);; Cellular Component: endoplasmic reticulum (GO:0005783);; Biological Process: proteolysis (GO:0006508);; Cellular Component: membrane (GO:0016020);; Biological Process: CAAX-box protein processing (GO:0071586);;	K06013|0|pop:POPTR_0014s08490g|POPTRDRAFT_664019; CAAX protease family protein; K06013 STE24 endopeptidase [EC:3.4.24.84] (A)	ko00900:Terpenoid backbone biosynthesis	[R]	General function prediction only	Peptidase family M48	CAAX prenyl protease 1 homolog OS=Arabidopsis thaliana (Mouse-ear cress) PE=1 SV=1	O	Posttranslational modification, protein turnover, chaperones	PREDICTED: CAAX prenyl protease 1 homolog [Nicotiana tomentosiformis]
F02_cb4839_c13/f1p1/991	--	--	Molecular Function: dimethylallyltranstransferase activity (GO:0004161);; Molecular Function: geranyltranstransferase activity (GO:0004337);; Cellular Component: cytoplasm (GO:0005737);; Biological Process: cholesterol biosynthetic process (GO:0006695);; Biological Process: geranyl diphosphate biosynthetic process (GO:0033384);; Biological Process: farnesyl diphosphate biosynthetic process (GO:00…	K00787|1.42815e-21|vvi:100232975|farnesyl diphosphate synthase; K00787 farnesyl diphosphate synthase [EC:2.5.1.1 2.5.1.10] (A)	ko00900:Terpenoid backbone biosynthesis	[H]	Coenzyme transport and metabolism	--	Farnesyl pyrophosphate synthase 1 GN=FPS1 OS=Lupinus albus (White lupin) PE=2 SV=1	H	Coenzyme transport and metabolism	hypothetical protein EUGRSUZ_E038362, partial [Eucalyptus grandis]
F01_cb3740_c10/f1p0/1740	--	--	Molecular Function: phosphomevalonate kinase activity (GO:0004631);; Molecular Function: ATP binding (GO:0005524);; Biological Process: phosphorylation (GO:0016310);;	K00938|9.59501e-28|sly:101256682|probable phosphomevalonate kinase; K00938 phosphomevalonate kinase [EC:2.7.4.2] (A)	ko00900:Terpenoid backbone biosynthesis	[I]	Lipid transport and metabolism	--	--	I	Lipid transport and metabolism	PREDICTED: phosphomevalonate kinase [Sesamum indicum]
F01_cb15591_c2/f1p0/1558	[IM]	--	Biological Process: isopentenyl diphosphate biosynthetic process, methylerythritol 4-phosphate pathway (GO:0019288);; Biological Process: oxidation-reduction process (GO:0055114);;	K03527|0|vvi:100267479|4-hydroxy-3-methylbut-2-enyl diphosphate reductase, chloroplastic; K03527 4-hydroxy-3-methylbut-2-enyl diphosphate reductase [EC:1.17.1.2] (A)	ko00900:Terpenoid backbone biosynthesis	--	--	LytB protein	4-hydroxy-3-methylbut-2-enyl diphosphate reductase, chloroplastic (Precursor) GN=OSJNBa0079G12.18 OS=Oryza sativa subsp. japonica (Rice) PE=2 SV=1	I	Lipid transport and metabolism	PREDICTED: 4-hydroxy-3-methylbut-2-enyl diphosphate reductase, chloroplastic [Sesamum indicum]
F01_cb16438_c4593/f1p1/2511	[I]	Lipid transport and metabolism	Molecular Function: iron ion binding (GO:0005506);; Biological Process: terpenoid biosynthetic process (GO:0016114);; Molecular Function: 4-hydroxy-3-methylbut-2-en-1-yl diphosphate synthase activity (GO:0046429);; Biological Process: oxidation-reduction process (GO:0055114);;	K03526|0|pxb:103956778|4-hydroxy-3-methylbut-2-en-1-yl diphosphate synthase, chloroplastic; K03526 (E)-4-hydroxy-3-methylbut-2-enyl-diphosphate synthase [EC:1.17.7.1 1.17.7.3] (A)	ko00900:Terpenoid backbone biosynthesis	--	--	GcpE protein;; GcpE protein	4-hydroxy-3-methylbut-2-en-1-yl diphosphate synthase, chloroplastic (Precursor) GN=MUP24.2 OS=Arabidopsis thaliana (Mouse-ear cress) PE=1 SV=1	I	Lipid transport and metabolism	(E)-4-hydroxy-3-methylbut-2-enyl diphosphate synthase [Salvia miltiorrhiza f. alba]
F01_cb8041_c7/f1p0/2343	[I]	Lipid transport and metabolism	Biological Process: maltose metabolic process (GO:0000023);; Biological Process: sulfur amino acid metabolic process (GO:0000096);; Biological Process: pentose-phosphate shunt (GO:0006098);; Biological Process: glycine catabolic process (GO:0006546);; Biological Process: unsaturated fatty acid biosynthetic process (GO:0006636);; Biological Process: phosphatidylglycerol biosynthetic process (GO:00…	K00099|0|ath:AT5G62790|DXR; 1-deoxy-D-xylulose 5-phosphate reductoisomerase; K00099 1-deoxy-D-xylulose-5-phosphate reductoisomerase [EC:1.1.1.267] (A)	ko00900:Terpenoid backbone biosynthesis	--	--	DXP reductoisomerase C-terminal domain;; 1-deoxy-D-xylulose 5-phosphate reductoisomerase C-terminal;; 1-deoxy-D-xylulose 5-phosphate reductoisomerase;; 1-deoxy-D-xylulose 5-phosphate reductoisomerase	1-deoxy-D-xylulose 5-phosphate reductoisomerase, chloroplastic (Precursor) GN=DXR OS=Mentha piperita (Peppermint) PE=2 SV=2	I	Lipid transport and metabolism	BnaA09g06230D [Brassica napus]
F02_cb8033_c0/f1p0/2284	[H]	Coenzyme transport and metabolism	Molecular Function: dimethylallyltranstransferase activity (GO:0004161);; Biological Process: isoprenoid biosynthetic process (GO:0008299);; Molecular Function: 2-alkenal reductase [NAD(P)] activity (GO:0032440);; Biological Process: oxidation-reduction process (GO:0055114);;	K13789|1.18833e-143|sly:778310|GGPS1; geranylgeranyl pyrophosphate synthase 1; K13789 geranylgeranyl diphosphate synthase, type II [EC:2.5.1.1 2.5.1.10 2.5.1.29] (A)	ko00900:Terpenoid backbone biosynthesis	[H]	Coenzyme transport and metabolism	Glutathione S-transferase, N-terminal domain;; Glutathione S-transferase, N-terminal domain;; Glutathione S-transferase, C-terminal domain;; Glutathione S-transferase, N-terminal domain	Geranylgeranyl pyrophosphate synthase, chloroplastic (Precursor) GN=GGPS OS=Hevea brasiliensis (Para rubber tree) PE=1 SV=1	H	Coenzyme transport and metabolism	hypothetical protein MIMGU_mgv1a018377mg [Erythranthe guttata]
F02_cb1130_c2/f1p0/2387	--	--	Biological Process: cellular process (GO:0009987);; Biological Process: protein maturation (GO:0051604);;	K08658|9.31075e-26|cam:101514895|CAAX prenyl protease 2-like; K08658 prenyl protein peptidase [EC:3.4.22.-] (A)	ko00900:Terpenoid backbone biosynthesis	[O]	Posttranslational modification, protein turnover, chaperones	--	CAAX prenyl protease 2 GN=F2H17 OS=Arabidopsis thaliana (Mouse-ear cress) PE=2 SV=2	O	Posttranslational modification, protein turnover, chaperones	PREDICTED: CAAX prenyl protease 2 [Sesamum indicum]
F02_cb1130_c4/f1p0/1805	--	--	Biological Process: protein metabolic process (GO:0019538);;	K08658|8.95011e-62|vvi:100247667|CAAX prenyl protease 2; K08658 prenyl protein peptidase [EC:3.4.22.-] (A)	ko00900:Terpenoid backbone biosynthesis	[O]	Posttranslational modification, protein turnover, chaperones	CAAX protease self-immunity	CAAX prenyl protease 2 GN=F2H17 OS=Arabidopsis thaliana (Mouse-ear cress) PE=2 SV=2	O	Posttranslational modification, protein turnover, chaperones	PREDICTED: CAAX prenyl protease 2 [Sesamum indicum]
F02_cb1130_c1/f1p0/1914	--	--	Biological Process: protein metabolic process (GO:0019538);;	K08658|1.26627e-59|vvi:100247667|CAAX prenyl protease 2; K08658 prenyl protein peptidase [EC:3.4.22.-] (A)	ko00900:Terpenoid backbone biosynthesis	[O]	Posttranslational modification, protein turnover, chaperones	CAAX protease self-immunity	CAAX prenyl protease 2 GN=F2H17 OS=Arabidopsis thaliana (Mouse-ear cress) PE=2 SV=2	O	Posttranslational modification, protein turnover, chaperones	PREDICTED: CAAX prenyl protease 2 [Sesamum indicum]
F02_cb4839_c10/f1p0/1284	[H]	Coenzyme transport and metabolism	Molecular Function: dimethylallyltranstransferase activity (GO:0004161);; Biological Process: isoprenoid biosynthetic process (GO:0008299);;	K00787|1.99361e-174|cmo:103501295|farnesyl pyrophosphate synthase 1; K00787 farnesyl diphosphate synthase [EC:2.5.1.1 2.5.1.10] (A)	ko00900:Terpenoid backbone biosynthesis	[H]	Coenzyme transport and metabolism	Polyprenyl synthetase	Farnesyl pyrophosphate synthase 1 GN=FPS1 OS=Lupinus albus (White lupin) PE=2 SV=1	H	Coenzyme transport and metabolism	farnesyl diphosphate synthetase [Salvia miltiorrhiza]
F02_cb1130_c5/f1p0/1202	--	--	Biological Process: cellular process (GO:0009987);; Biological Process: protein maturation (GO:0051604);;	K08658|5.52053e-122|vvi:100247667|CAAX prenyl protease 2; K08658 prenyl protein peptidase [EC:3.4.22.-] (A)	ko00900:Terpenoid backbone biosynthesis	[O]	Posttranslational modification, protein turnover, chaperones	CAAX protease self-immunity	CAAX prenyl protease 2 GN=F2H17 OS=Arabidopsis thaliana (Mouse-ear cress) PE=2 SV=2	O	Posttranslational modification, protein turnover, chaperones	PREDICTED: CAAX prenyl protease 2 [Sesamum indicum]
F01_cb16438_c4502/f1p0/2877	[I]	Lipid transport and metabolism	Molecular Function: iron ion binding (GO:0005506);; Biological Process: terpenoid biosynthetic process (GO:0016114);; Molecular Function: 4-hydroxy-3-methylbut-2-en-1-yl diphosphate synthase activity (GO:0046429);; Biological Process: oxidation-reduction process (GO:0055114);;	K03526|0|mdm:103422909|4-hydroxy-3-methylbut-2-en-1-yl diphosphate synthase, chloroplastic; K03526 (E)-4-hydroxy-3-methylbut-2-enyl-diphosphate synthase [EC:1.17.7.1 1.17.7.3] (A)	ko00900:Terpenoid backbone biosynthesis	--	--	GcpE protein;; GcpE protein	4-hydroxy-3-methylbut-2-en-1-yl diphosphate synthase, chloroplastic (Precursor) GN=MUP24.2 OS=Arabidopsis thaliana (Mouse-ear cress) PE=1 SV=1	I	Lipid transport and metabolism	(E)-4-hydroxy-3-methylbut-2-enyl diphosphate synthase [Salvia miltiorrhiza f. alba]
F01_cb9887_c11/f3p0/2086	[H]	Coenzyme transport and metabolism	Molecular Function: trans-hexaprenyltranstransferase activity (GO:0000010);; Biological Process: isoprenoid biosynthetic process (GO:0008299);; Biological Process: photosynthesis (GO:0015979);;	K05356|0|rcu:RCOM_1182760|solanesyl diphosphate synthase, putative (EC:2.5.1.30); K05356 all-trans-nonaprenyl-diphosphate synthase [EC:2.5.1.84 2.5.1.85] (A)	ko00900:Terpenoid backbone biosynthesis	[H]	Coenzyme transport and metabolism	Polyprenyl synthetase	Solanesyl diphosphate synthase 1 GN=T30F21.15 OS=Arabidopsis thaliana (Mouse-ear cress) PE=1 SV=1	H	Coenzyme transport and metabolism	PREDICTED: probable solanesyl-diphosphate synthase 3, chloroplastic isoform X2 [Sesamum indicum]
F01_cb13079_c10/f3p0/1401	[H]	Coenzyme transport and metabolism	Molecular Function: dimethylallyltranstransferase activity (GO:0004161);; Molecular Function: farnesyltranstransferase activity (GO:0004311);; Molecular Function: geranyltranstransferase activity (GO:0004337);; Cellular Component: chloroplast (GO:0009507);; Biological Process: carotenoid biosynthetic process (GO:0016117);; Biological Process: geranyl diphosphate biosynthetic process (GO:0033384);…	K13789|8.03534e-179|vvi:100266842|geranylgeranyl pyrophosphate synthase, chloroplastic; K13789 geranylgeranyl diphosphate synthase, type II [EC:2.5.1.1 2.5.1.10 2.5.1.29] (A)	ko00900:Terpenoid backbone biosynthesis	[H]	Coenzyme transport and metabolism	Polyprenyl synthetase	Geranylgeranyl pyrophosphate synthase, chloroplastic (Precursor) GN=GGPS1 OS=Catharanthus roseus (Madagascar periwinkle) PE=3 SV=1	H	Coenzyme transport and metabolism	PREDICTED: geranylgeranyl pyrophosphate synthase, chloroplastic-like [Sesamum indicum]
F02_cb11041_c52928/f1p0/2459	[I]	Lipid transport and metabolism	Cellular Component: membrane (GO:0016020);; Molecular Function: kinase activity (GO:0016301);; Biological Process: phosphorylation (GO:0016310);;	K15892|1.69831e-116|sot:102606110|probable phytol kinase 3, chloroplastic-like; K15892 farnesol kinase [EC:2.7.1.-] (A)	ko00900:Terpenoid backbone biosynthesis	[S]	Function unknown	Cytidylyltransferase family	Probable phytol kinase 3, chloroplastic (Precursor) OS=Glycine max (Soybean) PE=2 SV=1	I	Lipid transport and metabolism	hypothetical protein MIMGU_mgv1a010789mg [Erythranthe guttata]
F01_cb16438_c46381/f1p0/3366	[I]	Lipid transport and metabolism	Molecular Function: transferase activity, transferring alkyl or aryl (other than methyl) groups (GO:0016765);;	K11778|2.05705e-121|vvi:100251570|dehydrodolichyl diphosphate synthase 6-like; K11778 ditrans,polycis-polyprenyl diphosphate synthase [EC:2.5.1.87] (A)	ko00900:Terpenoid backbone biosynthesis	[I]	Lipid transport and metabolism	Putative undecaprenyl diphosphate synthase;; Putative undecaprenyl diphosphate synthase;; Putative undecaprenyl diphosphate synthase;; Putative undecaprenyl diphosphate synthase	Dehydrodolichyl diphosphate synthase 6 GN=At2g17570 OS=Arabidopsis thaliana (Mouse-ear cress) PE=2 SV=2	I	Lipid transport and metabolism	PREDICTED: dehydrodolichyl diphosphate synthase 6-like [Sesamum indicum]
F01_cb9135_c0/f1p0/2189	[I]	Lipid transport and metabolism	Biological Process: isoprenoid biosynthetic process (GO:0008299);; Molecular Function: 2-C-methyl-D-erythritol 4-phosphate cytidylyltransferase activity (GO:0050518);;	K00991|3.40529e-106|sot:102588399|2-C-methyl-D-erythritol 4-phosphate cytidylyltransferase, chloroplastic-like; K00991 2-C-methyl-D-erythritol 4-phosphate cytidylyltransferase [EC:2.7.7.60] (A)	ko00900:Terpenoid backbone biosynthesis	--	--	2-C-methyl-D-erythritol 4-phosphate cytidylyltransferase	2-C-methyl-D-erythritol 4-phosphate cytidylyltransferase, chloroplastic (Precursor) GN=T8K22.20 OS=Arabidopsis thaliana (Mouse-ear cress) PE=1 SV=1	I	Lipid transport and metabolism	putative 2-C-methyl-D-erythritol 2,4-cyclodiphosphate synthase, partial [Olea europaea]
F01_cb9129_c1/f3p0/928	[I]	Lipid transport and metabolism	Molecular Function: isopentenyl-diphosphate delta-isomerase activity (GO:0004452);; Biological Process: isoprenoid biosynthetic process (GO:0008299);; Biological Process: photosynthesis (GO:0015979);; Biological Process: chlorophyll biosynthetic process (GO:0015995);; Molecular Function: hydrolase activity (GO:0016787);; Molecular Function: metal ion binding (GO:0046872);; Biological Process: dim…	K01823|1.07771e-160|mdm:103414031|isopentenyl-diphosphate Delta-isomerase I-like; K01823 isopentenyl-diphosphate delta-isomerase [EC:5.3.3.2] (A)	ko00900:Terpenoid backbone biosynthesis	[Q]	Secondary metabolites biosynthesis, transport and catabolism	NUDIX domain	Isopentenyl-diphosphate Delta-isomerase II GN=IPI2 OS=Camptotheca acuminata (Happy tree) PE=2 SV=1	I	Lipid transport and metabolism	isopentenyl diphosphate isomerase 2 [Panax notoginseng]
F01_cb13703_c5/f2p0/1088	--	--	--	K11778|5.72887e-80|sot:102596985|nogo-B receptor-like; K11778 ditrans,polycis-polyprenyl diphosphate synthase [EC:2.5.1.87] (A)	ko00900:Terpenoid backbone biosynthesis	--	--	--	--	S	Function unknown	PREDICTED: dehydrodolichyl diphosphate syntase complex subunit nus1-like [Sesamum indicum]
F01_cb12873_c1/f2p0/1231	[I]	Lipid transport and metabolism	Molecular Function: transferase activity, transferring alkyl or aryl (other than methyl) groups (GO:0016765);;	K11778|4.62743e-130|pmum:103334495|dehydrodolichyl diphosphate synthase 6-like; K11778 ditrans,polycis-polyprenyl diphosphate synthase [EC:2.5.1.87] (A)	ko00900:Terpenoid backbone biosynthesis	[I]	Lipid transport and metabolism	Putative undecaprenyl diphosphate synthase	Dehydrodolichyl diphosphate synthase 6 GN=At2g17570 OS=Arabidopsis thaliana (Mouse-ear cress) PE=2 SV=2	I	Lipid transport and metabolism	PREDICTED: dehydrodolichyl diphosphate synthase 6 [Sesamum indicum]
F02_cb8613_c1/f2p0/1865	[H]	Coenzyme transport and metabolism	Molecular Function: trans-hexaprenyltranstransferase activity (GO:0000010);; Molecular Function: dimethylallyltranstransferase activity (GO:0004161);; Biological Process: ubiquinone biosynthetic process (GO:0006744);; Biological Process: isoprenoid biosynthetic process (GO:0008299);; Cellular Component: chloroplast (GO:0009507);; Biological Process: embryo development (GO:0009790);; Molecular Fun…	K14066|0|sot:102588989|solanesyl diphosphate synthase 3, chloroplastic/mitochondrial-like; K14066 geranyl diphosphate synthase [EC:2.5.1.1] (A)	ko00900:Terpenoid backbone biosynthesis	[H]	Coenzyme transport and metabolism	Polyprenyl synthetase	Solanesyl-diphosphate synthase 1, mitochondrial (Precursor) GN=SPS1 OS=Oryza sativa subsp. japonica (Rice) PE=1 SV=1	H	Coenzyme transport and metabolism	PREDICTED: solanesyl diphosphate synthase 3, chloroplastic/mitochondrial isoform X1 [Sesamum indicum]
F02_cb7697_c20/f1p0/1749	[IM]	--	Biological Process: isopentenyl diphosphate biosynthetic process, methylerythritol 4-phosphate pathway (GO:0019288);; Biological Process: oxidation-reduction process (GO:0055114);;	K03527|0|vvi:100267479|4-hydroxy-3-methylbut-2-enyl diphosphate reductase, chloroplastic; K03527 4-hydroxy-3-methylbut-2-enyl diphosphate reductase [EC:1.17.1.2] (A)	ko00900:Terpenoid backbone biosynthesis	--	--	LytB protein;; LytB protein	4-hydroxy-3-methylbut-2-enyl diphosphate reductase, chloroplastic (Precursor) GN=F10M10.120 OS=Arabidopsis thaliana (Mouse-ear cress) PE=2 SV=1	I	Lipid transport and metabolism	PREDICTED: 4-hydroxy-3-methylbut-2-enyl diphosphate reductase, chloroplastic [Sesamum indicum]
F01_cb16438_c15606/f1p0/2083	[I]	Lipid transport and metabolism	Cellular Component: membrane (GO:0016020);; Molecular Function: oxidoreductase activity (GO:0016491);; Biological Process: single-organism metabolic process (GO:0044710);;	K00021|2.50243e-143|sot:102585007|3-hydroxy-3-methylglutaryl-coenzyme A reductase 1-like; K00021 hydroxymethylglutaryl-CoA reductase (NADPH) [EC:1.1.1.34] (A)	ko00900:Terpenoid backbone biosynthesis	[I]	Lipid transport and metabolism	Hydroxymethylglutaryl-coenzyme A reductase;; Hydroxymethylglutaryl-coenzyme A reductase;; Hydroxymethylglutaryl-coenzyme A reductase;; Hydroxymethylglutaryl-coenzyme A reductase;; Hydroxymethylglutaryl-coenzyme A reductase	3-hydroxy-3-methylglutaryl-coenzyme A reductase 2 GN=HMGR2 OS=Capsicum annuum (Bell pepper) PE=2 SV=1	I	Lipid transport and metabolism	PREDICTED: 3-hydroxy-3-methylglutaryl-coenzyme A reductase [Sesamum indicum]
F01_cb16438_c55396/f2p0/1698	[I]	Lipid transport and metabolism	Molecular Function: transferase activity, transferring alkyl or aryl (other than methyl) groups (GO:0016765);;	K11778|9.55253e-129|vvi:100251570|dehydrodolichyl diphosphate synthase 6-like; K11778 ditrans,polycis-polyprenyl diphosphate synthase [EC:2.5.1.87] (A)	ko00900:Terpenoid backbone biosynthesis	[I]	Lipid transport and metabolism	Putative undecaprenyl diphosphate synthase	Dehydrodolichyl diphosphate synthase 6 GN=At2g17570 OS=Arabidopsis thaliana (Mouse-ear cress) PE=2 SV=2	I	Lipid transport and metabolism	PREDICTED: dehydrodolichyl diphosphate synthase 6-like [Sesamum indicum]
F01_cb12076_c8/f1p0/1914	[O]	Posttranslational modification, protein turnover, chaperones	Molecular Function: metalloendopeptidase activity (GO:0004222);; Cellular Component: vacuole (GO:0005773);; Cellular Component: endoplasmic reticulum (GO:0005783);; Biological Process: proteolysis (GO:0006508);; Biological Process: ER to Golgi vesicle-mediated transport (GO:0006888);; Cellular Component: membrane (GO:0016020);; Biological Process: CAAX-box protein processing (GO:0071586);;	K06013|0|pop:POPTR_0014s08490g|POPTRDRAFT_664019; CAAX protease family protein; K06013 STE24 endopeptidase [EC:3.4.24.84] (A)	ko00900:Terpenoid backbone biosynthesis	[R]	General function prediction only	Peptidase family M48	CAAX prenyl protease 1 homolog OS=Arabidopsis thaliana (Mouse-ear cress) PE=1 SV=1	O	Posttranslational modification, protein turnover, chaperones	PREDICTED: CAAX prenyl protease 1 homolog [Nicotiana tomentosiformis]
F02_cb9372_c6/f1p0/1778	[H]	Coenzyme transport and metabolism	Molecular Function: trans-hexaprenyltranstransferase activity (GO:0000010);; Biological Process: isoprenoid biosynthetic process (GO:0008299);; Biological Process: photosynthesis (GO:0015979);;	K05356|0|rcu:RCOM_1182760|solanesyl diphosphate synthase, putative (EC:2.5.1.30); K05356 all-trans-nonaprenyl-diphosphate synthase [EC:2.5.1.84 2.5.1.85] (A)	ko00900:Terpenoid backbone biosynthesis	[H]	Coenzyme transport and metabolism	Polyprenyl synthetase	Solanesyl diphosphate synthase 1 GN=T30F21.15 OS=Arabidopsis thaliana (Mouse-ear cress) PE=1 SV=1	H	Coenzyme transport and metabolism	PREDICTED: probable solanesyl-diphosphate synthase 3, chloroplastic isoform X1 [Sesamum indicum]
F01_cb16438_c19807/f1p2/2137	[I]	Lipid transport and metabolism	Molecular Function: hydroxymethylglutaryl-CoA reductase (NADPH) activity (GO:0004420);; Cellular Component: endoplasmic reticulum membrane (GO:0005789);; Biological Process: isoprenoid biosynthetic process (GO:0008299);; Biological Process: coenzyme A metabolic process (GO:0015936);; Cellular Component: integral component of membrane (GO:0016021);; Molecular Function: NADP binding (GO:0050661);; …	K00021|0|sot:102577467|HMG3, HMG3.3; HMG-CoA reductase (EC:1.1.1.34); K00021 hydroxymethylglutaryl-CoA reductase (NADPH) [EC:1.1.1.34] (A)	ko00900:Terpenoid backbone biosynthesis	[I]	Lipid transport and metabolism	Hydroxymethylglutaryl-coenzyme A reductase	3-hydroxy-3-methylglutaryl-coenzyme A reductase GN=HMGR OS=Nicotiana sylvestris (Wood tobacco) PE=2 SV=1	I	Lipid transport and metabolism	PREDICTED: 3-hydroxy-3-methylglutaryl-coenzyme A reductase [Sesamum indicum]
F01_cb9137_c3/f1p0/1866	--	--	Molecular Function: peptidase activity (GO:0008233);; Biological Process: protein metabolic process (GO:0019538);;	K08658|5.19243e-68|vvi:100247667|CAAX prenyl protease 2; K08658 prenyl protein peptidase [EC:3.4.22.-] (A)	ko00900:Terpenoid backbone biosynthesis	[O]	Posttranslational modification, protein turnover, chaperones	CAAX protease self-immunity;; CAAX protease self-immunity	CAAX prenyl protease 2 GN=F2H17 OS=Arabidopsis thaliana (Mouse-ear cress) PE=2 SV=2	O	Posttranslational modification, protein turnover, chaperones	PREDICTED: CAAX prenyl protease 2 [Sesamum indicum]
F02_cb18531_c1/f1p0/1145	[I]	Lipid transport and metabolism	Biological Process: pentose-phosphate shunt (GO:0006098);; Biological Process: rRNA processing (GO:0006364);; Biological Process: unsaturated fatty acid biosynthetic process (GO:0006636);; Biological Process: phosphatidylglycerol biosynthetic process (GO:0006655);; Biological Process: ubiquinone biosynthetic process (GO:0006744);; Molecular Function: 2-C-methyl-D-erythritol 2,4-cyclodiphosphate s…	K01770|1.48956e-27|ppp:PHYPADRAFT_150209|hypothetical protein; K01770 2-C-methyl-D-erythritol 2,4-cyclodiphosphate synthase [EC:4.6.1.12] (A)	ko00900:Terpenoid backbone biosynthesis	--	--	YgbB family	2-C-methyl-D-erythritol 2,4-cyclodiphosphate synthase, chloroplastic (Precursor) OS=Arabidopsis thaliana (Mouse-ear cress) PE=1 SV=1	I	Lipid transport and metabolism	2-C-methyl-D-erythritol 2,4-cyclodiphosphate synthase [Salvia miltiorrhiza]
F02_cb3805_c3/f1p0/2364	[O]	Posttranslational modification, protein turnover, chaperones	Molecular Function: transferase activity (GO:0016740);;	K05954|1.62654e-69|cam:101501751|protein farnesyltransferase subunit beta-like; K05954 protein farnesyltransferase subunit beta [EC:2.5.1.58] (A)	ko00900:Terpenoid backbone biosynthesis	[O]	Posttranslational modification, protein turnover, chaperones	Prenyltransferase and squalene oxidase repeat;; Prenyltransferase and squalene oxidase repeat;; Prenyltransferase and squalene oxidase repeat	Protein farnesyltransferase subunit beta GN=FTB OS=Pisum sativum (Garden pea) PE=1 SV=1	O	Posttranslational modification, protein turnover, chaperones	PREDICTED: protein farnesyltransferase subunit beta [Sesamum indicum]
F02_cb13834_c4/f1p0/1213	[I]	Lipid transport and metabolism	Biological Process: lipid biosynthetic process (GO:0008610);; Molecular Function: isomerase activity (GO:0016853);; Biological Process: cellular biosynthetic process (GO:0044249);; Biological Process: cellular lipid metabolic process (GO:0044255);;	K01823|4.27434e-83|fve:101313998|isopentenyl-diphosphate Delta-isomerase II-like; K01823 isopentenyl-diphosphate delta-isomerase [EC:5.3.3.2] (A)	ko00900:Terpenoid backbone biosynthesis	[Q]	Secondary metabolites biosynthesis, transport and catabolism	NUDIX domain	Isopentenyl-diphosphate Delta-isomerase II GN=IPI2 OS=Camptotheca acuminata (Happy tree) PE=2 SV=1	I	Lipid transport and metabolism	PREDICTED: isopentenyl-diphosphate Delta-isomerase II-like [Fragaria vesca subsp. vesca]
F01_cb16232_c1/f1p0/1510	[I]	Lipid transport and metabolism	Molecular Function: transferase activity (GO:0016740);;	K11778|3.57657e-83|vvi:100251570|dehydrodolichyl diphosphate synthase 6-like; K11778 ditrans,polycis-polyprenyl diphosphate synthase [EC:2.5.1.87] (A)	ko00900:Terpenoid backbone biosynthesis	[I]	Lipid transport and metabolism	Putative undecaprenyl diphosphate synthase;; Putative undecaprenyl diphosphate synthase;; Putative undecaprenyl diphosphate synthase	Dehydrodolichyl diphosphate synthase 6 GN=At2g17570 OS=Arabidopsis thaliana (Mouse-ear cress) PE=2 SV=2	I	Lipid transport and metabolism	PREDICTED: dehydrodolichyl diphosphate synthase 6-like [Sesamum indicum]
F01_cb8417_c11/f1p0/2022	[I]	Lipid transport and metabolism	Molecular Function: diphosphomevalonate decarboxylase activity (GO:0004163);; Molecular Function: ATP binding (GO:0005524);; Biological Process: isoprenoid biosynthetic process (GO:0008299);; Molecular Function: protein homodimerization activity (GO:0042803);;	K01597|7.99167e-165|vvi:100251686|diphosphomevalonate decarboxylase; K01597 diphosphomevalonate decarboxylase [EC:4.1.1.33] (A)	ko00900:Terpenoid backbone biosynthesis	[I]	Lipid transport and metabolism	GHMP kinases N terminal domain	--	I	Lipid transport and metabolism	mevalonate diphosphate decarboxylase [Salvia miltiorrhiza]
F01_cb12076_c12/f1p1/1639	[O]	Posttranslational modification, protein turnover, chaperones	Molecular Function: metalloendopeptidase activity (GO:0004222);; Cellular Component: vacuole (GO:0005773);; Cellular Component: endoplasmic reticulum (GO:0005783);; Biological Process: proteolysis (GO:0006508);; Biological Process: ER to Golgi vesicle-mediated transport (GO:0006888);; Cellular Component: membrane (GO:0016020);; Biological Process: CAAX-box protein processing (GO:0071586);;	K06013|0|pop:POPTR_0014s08490g|POPTRDRAFT_664019; CAAX protease family protein; K06013 STE24 endopeptidase [EC:3.4.24.84] (A)	ko00900:Terpenoid backbone biosynthesis	[R]	General function prediction only	Peptidase family M48	CAAX prenyl protease 1 homolog OS=Arabidopsis thaliana (Mouse-ear cress) PE=1 SV=1	O	Posttranslational modification, protein turnover, chaperones	PREDICTED: CAAX prenyl protease 1 homolog [Nicotiana tomentosiformis]
F02_cb7697_c17/f1p0/1711	[IM]	--	Cellular Component: chloroplast stroma (GO:0009570);; Biological Process: isopentenyl diphosphate biosynthetic process, methylerythritol 4-phosphate pathway (GO:0019288);; Molecular Function: 4-hydroxy-3-methylbut-2-en-1-yl diphosphate synthase activity (GO:0046429);; Biological Process: response to antibiotic (GO:0046677);; Molecular Function: 4-hydroxy-3-methylbut-2-en-1-yl diphosphate reductas…	K03527|4.96257e-59|vvi:100267479|4-hydroxy-3-methylbut-2-enyl diphosphate reductase, chloroplastic; K03527 4-hydroxy-3-methylbut-2-enyl diphosphate reductase [EC:1.17.1.2] (A)	ko00900:Terpenoid backbone biosynthesis	--	--	LytB protein;; LytB protein	4-hydroxy-3-methylbut-2-enyl diphosphate reductase, chloroplastic (Precursor) GN=F10M10.120 OS=Arabidopsis thaliana (Mouse-ear cress) PE=2 SV=1	I	Lipid transport and metabolism	PREDICTED: 4-hydroxy-3-methylbut-2-enyl diphosphate reductase, chloroplastic [Sesamum indicum]
F01_cb8417_c31/f64p2/1699	[I]	Lipid transport and metabolism	Molecular Function: diphosphomevalonate decarboxylase activity (GO:0004163);; Molecular Function: ATP binding (GO:0005524);; Biological Process: isoprenoid biosynthetic process (GO:0008299);; Molecular Function: protein homodimerization activity (GO:0042803);;	K01597|0|vvi:100251686|diphosphomevalonate decarboxylase; K01597 diphosphomevalonate decarboxylase [EC:4.1.1.33] (A)	ko00900:Terpenoid backbone biosynthesis	[I]	Lipid transport and metabolism	GHMP kinases N terminal domain	--	I	Lipid transport and metabolism	mevalonate diphosphate decarboxylase [Salvia miltiorrhiza]
F01_cb16438_c14800/f1p0/2156	[I]	Lipid transport and metabolism	Molecular Function: hydroxymethylglutaryl-CoA reductase (NADPH) activity (GO:0004420);; Cellular Component: endoplasmic reticulum membrane (GO:0005789);; Biological Process: isoprenoid biosynthetic process (GO:0008299);; Biological Process: coenzyme A metabolic process (GO:0015936);; Cellular Component: integral component of membrane (GO:0016021);; Molecular Function: NADP binding (GO:0050661);; …	K00021|0|sot:102577899|3-hydroxy-3-methylglutaryl coenzyme A reductase; K00021 hydroxymethylglutaryl-CoA reductase (NADPH) [EC:1.1.1.34] (A)	ko00900:Terpenoid backbone biosynthesis	[I]	Lipid transport and metabolism	Hydroxymethylglutaryl-coenzyme A reductase	3-hydroxy-3-methylglutaryl-coenzyme A reductase GN=HMGR OS=Nicotiana sylvestris (Wood tobacco) PE=2 SV=1	I	Lipid transport and metabolism	PREDICTED: 3-hydroxy-3-methylglutaryl-coenzyme A reductase [Sesamum indicum]
F01_cb16438_c20095/f1p0/2386	[I]	Lipid transport and metabolism	Molecular Function: hydroxymethylglutaryl-CoA reductase (NADPH) activity (GO:0004420);; Cellular Component: endoplasmic reticulum membrane (GO:0005789);; Biological Process: isoprenoid biosynthetic process (GO:0008299);; Biological Process: coenzyme A metabolic process (GO:0015936);; Cellular Component: integral component of membrane (GO:0016021);; Molecular Function: NADP binding (GO:0050661);; …	K00021|0|sot:102599791|hmg1; 3-hydroxy-3-methylglutaryl-coenzyme A reductase 1-like; K00021 hydroxymethylglutaryl-CoA reductase (NADPH) [EC:1.1.1.34] (A)	ko00900:Terpenoid backbone biosynthesis	[I]	Lipid transport and metabolism	Hydroxymethylglutaryl-coenzyme A reductase	3-hydroxy-3-methylglutaryl-coenzyme A reductase OS=Camptotheca acuminata (Happy tree) PE=3 SV=1	I	Lipid transport and metabolism	PREDICTED: 3-hydroxy-3-methylglutaryl-coenzyme A reductase [Sesamum indicum]
F01_cb16438_c44121/f1p0/2836	[I]	Lipid transport and metabolism	Molecular Function: hydroxymethylglutaryl-CoA reductase (NADPH) activity (GO:0004420);; Cellular Component: endoplasmic reticulum membrane (GO:0005789);; Biological Process: isoprenoid biosynthetic process (GO:0008299);; Biological Process: coenzyme A metabolic process (GO:0015936);; Cellular Component: integral component of membrane (GO:0016021);; Molecular Function: NADP binding (GO:0050661);; …	K00021|0|sot:102577899|3-hydroxy-3-methylglutaryl coenzyme A reductase; K00021 hydroxymethylglutaryl-CoA reductase (NADPH) [EC:1.1.1.34] (A)	ko00900:Terpenoid backbone biosynthesis	[I]	Lipid transport and metabolism	Hydroxymethylglutaryl-coenzyme A reductase	3-hydroxy-3-methylglutaryl-coenzyme A reductase OS=Camptotheca acuminata (Happy tree) PE=3 SV=1	I	Lipid transport and metabolism	PREDICTED: 3-hydroxy-3-methylglutaryl-coenzyme A reductase [Sesamum indicum]
F01_cb9137_c5/f1p0/1318	--	--	Biological Process: protein metabolic process (GO:0019538);;	K08658|2.12877e-118|vvi:100247667|CAAX prenyl protease 2; K08658 prenyl protein peptidase [EC:3.4.22.-] (A)	ko00900:Terpenoid backbone biosynthesis	[O]	Posttranslational modification, protein turnover, chaperones	CAAX protease self-immunity	CAAX prenyl protease 2 GN=F2H17 OS=Arabidopsis thaliana (Mouse-ear cress) PE=2 SV=2	O	Posttranslational modification, protein turnover, chaperones	PREDICTED: CAAX prenyl protease 2 [Sesamum indicum]
F01_cb14174_c2/f1p0/464	[I]	Lipid transport and metabolism	Cellular Component: mitochondrion (GO:0005739);; Molecular Function: 2-C-methyl-D-erythritol 2,4-cyclodiphosphate synthase activity (GO:0008685);; Cellular Component: chloroplast stroma (GO:0009570);; Biological Process: chlorophyll biosynthetic process (GO:0015995);; Biological Process: carotenoid biosynthetic process (GO:0016117);;	K01770|2.47022e-51|sly:101246365|2-C-methyl-D-erythritol 2,4-cyclodiphosphate synthase, chloroplastic; K01770 2-C-methyl-D-erythritol 2,4-cyclodiphosphate synthase [EC:4.6.1.12] (A)	ko00900:Terpenoid backbone biosynthesis	--	--	YgbB family;; YgbB family	2-C-methyl-D-erythritol 2,4-cyclodiphosphate synthase, chloroplastic (Precursor) GN=ISPF OS=Catharanthus roseus (Madagascar periwinkle) PE=2 SV=1	I	Lipid transport and metabolism	2C-methyl-D-erythritol 2,4-cyclodiphosphate synthase [Tripterygium wilfordii]
F01_cb12158_c1/f1p0/1768	[H]	Coenzyme transport and metabolism	Molecular Function: prenyltransferase activity (GO:0004659);; Biological Process: phospholipid biosynthetic process (GO:0008654);; Cellular Component: plastid (GO:0009536);; Biological Process: terpenoid biosynthetic process (GO:0016114);;	K13789|9.54595e-144|mdm:103418313|geranylgeranyl pyrophosphate synthase, chloroplastic-like; K13789 geranylgeranyl diphosphate synthase, type II [EC:2.5.1.1 2.5.1.10 2.5.1.29] (A)	ko00900:Terpenoid backbone biosynthesis	[H]	Coenzyme transport and metabolism	Polyprenyl synthetase	Geranylgeranyl pyrophosphate synthase, chloroplastic (Precursor) GN=GGPS OS=Hevea brasiliensis (Para rubber tree) PE=1 SV=1	H	Coenzyme transport and metabolism	Geranylgeranyl pyrophosphate synthase [Morus notabilis]
F01_cb16438_c40633/f2p0/2196	[I]	Lipid transport and metabolism	Biological Process: sulfur amino acid metabolic process (GO:0000096);; Biological Process: MAPK cascade (GO:0000165);; Molecular Function: iron ion binding (GO:0005506);; Biological Process: pentose-phosphate shunt (GO:0006098);; Biological Process: regulation of translation (GO:0006417);; Biological Process: glycine catabolic process (GO:0006546);; Biological Process: protein targeting to membra…	K03526|0|mdm:103413028|4-hydroxy-3-methylbut-2-en-1-yl diphosphate synthase, chloroplastic; K03526 (E)-4-hydroxy-3-methylbut-2-enyl-diphosphate synthase [EC:1.17.7.1 1.17.7.3] (A)	ko00900:Terpenoid backbone biosynthesis	--	--	GcpE protein	4-hydroxy-3-methylbut-2-en-1-yl diphosphate synthase, chloroplastic (Precursor) GN=MUP24.2 OS=Arabidopsis thaliana (Mouse-ear cress) PE=1 SV=1	I	Lipid transport and metabolism	4-hydroxy-3-methylbut-2-en-1-yl diphosphate synthase [Morus notabilis]
F01_cb16438_c16889/f1p1/2254	[I]	Lipid transport and metabolism	Molecular Function: hydroxymethylglutaryl-CoA reductase (NADPH) activity (GO:0004420);; Cellular Component: mitochondrion (GO:0005739);; Cellular Component: endoplasmic reticulum membrane (GO:0005789);; Biological Process: coenzyme A metabolic process (GO:0015936);; Cellular Component: integral component of membrane (GO:0016021);; Biological Process: triterpenoid biosynthetic process (GO:0016104)…	K00021|0|sly:543702|3-hydroxy-3-methylglutaryl-coenzyme A reductase 1; K00021 hydroxymethylglutaryl-CoA reductase (NADPH) [EC:1.1.1.34] (A)	ko00900:Terpenoid backbone biosynthesis	[I]	Lipid transport and metabolism	Hydroxymethylglutaryl-coenzyme A reductase;; Hydroxymethylglutaryl-coenzyme A reductase	3-hydroxy-3-methylglutaryl-coenzyme A reductase 3 OS=Oryza sativa subsp. japonica (Rice) PE=2 SV=2	I	Lipid transport and metabolism	hypothetical protein JCGZ_10761 [Jatropha curcas]
F02_cb8613_c0/f3p0/1668	[H]	Coenzyme transport and metabolism	Molecular Function: trans-hexaprenyltranstransferase activity (GO:0000010);; Molecular Function: dimethylallyltranstransferase activity (GO:0004161);; Biological Process: ubiquinone biosynthetic process (GO:0006744);; Biological Process: isoprenoid biosynthetic process (GO:0008299);; Cellular Component: chloroplast (GO:0009507);; Biological Process: embryo development (GO:0009790);; Molecular Fun…	K14066|0|rcu:RCOM_0747390|geranylgeranyl pyrophosphate synthase, putative (EC:2.5.1.30); K14066 geranyl diphosphate synthase [EC:2.5.1.1] (A)	ko00900:Terpenoid backbone biosynthesis	[H]	Coenzyme transport and metabolism	Polyprenyl synthetase	Solanesyl-diphosphate synthase 1, mitochondrial (Precursor) GN=SPS1 OS=Oryza sativa subsp. japonica (Rice) PE=1 SV=1	H	Coenzyme transport and metabolism	PREDICTED: solanesyl diphosphate synthase 3, chloroplastic/mitochondrial isoform X1 [Sesamum indicum]
F01_cb16438_c33463/f1p0/2545	[I]	Lipid transport and metabolism	Molecular Function: hydroxymethylglutaryl-CoA reductase (NADPH) activity (GO:0004420);; Cellular Component: endoplasmic reticulum membrane (GO:0005789);; Biological Process: isoprenoid biosynthetic process (GO:0008299);; Biological Process: coenzyme A metabolic process (GO:0015936);; Cellular Component: integral component of membrane (GO:0016021);; Molecular Function: NADP binding (GO:0050661);; …	K00021|0|sot:102599791|hmg1; 3-hydroxy-3-methylglutaryl-coenzyme A reductase 1-like; K00021 hydroxymethylglutaryl-CoA reductase (NADPH) [EC:1.1.1.34] (A)	ko00900:Terpenoid backbone biosynthesis	[I]	Lipid transport and metabolism	Hydroxymethylglutaryl-coenzyme A reductase	3-hydroxy-3-methylglutaryl-coenzyme A reductase OS=Camptotheca acuminata (Happy tree) PE=3 SV=1	I	Lipid transport and metabolism	hypothetical protein MIMGU_mgv1a003590mg [Erythranthe guttata]
F01_cb16438_c30469/f9p0/2292	[I]	Lipid transport and metabolism	Molecular Function: hydroxymethylglutaryl-CoA reductase (NADPH) activity (GO:0004420);; Cellular Component: endoplasmic reticulum membrane (GO:0005789);; Biological Process: isoprenoid biosynthetic process (GO:0008299);; Biological Process: coenzyme A metabolic process (GO:0015936);; Cellular Component: integral component of membrane (GO:0016021);; Molecular Function: NADP binding (GO:0050661);; …	K00021|0|sot:102577899|3-hydroxy-3-methylglutaryl coenzyme A reductase; K00021 hydroxymethylglutaryl-CoA reductase (NADPH) [EC:1.1.1.34] (A)	ko00900:Terpenoid backbone biosynthesis	[I]	Lipid transport and metabolism	Hydroxymethylglutaryl-coenzyme A reductase	3-hydroxy-3-methylglutaryl-coenzyme A reductase OS=Camptotheca acuminata (Happy tree) PE=3 SV=1	I	Lipid transport and metabolism	hypothetical protein MIMGU_mgv1a003590mg [Erythranthe guttata]
F02_cb9159_c10/f1p0/669	[I]	Lipid transport and metabolism	Molecular Function: hydroxymethylglutaryl-CoA reductase (NADPH) activity (GO:0004420);; Biological Process: isoprenoid biosynthetic process (GO:0008299);; Biological Process: coenzyme A metabolic process (GO:0015936);; Cellular Component: integral component of membrane (GO:0016021);; Molecular Function: NADP binding (GO:0050661);; Biological Process: oxidation-reduction process (GO:0055114);;	K00021|2.12105e-33|cam:101506157|3-hydroxy-3-methylglutaryl-coenzyme A reductase 1-like; K00021 hydroxymethylglutaryl-CoA reductase (NADPH) [EC:1.1.1.34] (A)	ko00900:Terpenoid backbone biosynthesis	[I]	Lipid transport and metabolism	--	3-hydroxy-3-methylglutaryl-coenzyme A reductase GN=HMGR OS=Catharanthus roseus (Madagascar periwinkle) PE=2 SV=1	I	Lipid transport and metabolism	3-hydroxy-3-methylglutaryl CoA reductase 2 [Solanum cheesmaniae]
F02_cb11041_c48309/f1p0/2324	[I]	Lipid transport and metabolism	Molecular Function: hydroxymethylglutaryl-CoA reductase (NADPH) activity (GO:0004420);; Cellular Component: endoplasmic reticulum membrane (GO:0005789);; Biological Process: isoprenoid biosynthetic process (GO:0008299);; Biological Process: coenzyme A metabolic process (GO:0015936);; Cellular Component: integral component of membrane (GO:0016021);; Molecular Function: NADP binding (GO:0050661);; …	K00021|0|sot:102599791|hmg1; 3-hydroxy-3-methylglutaryl-coenzyme A reductase 1-like; K00021 hydroxymethylglutaryl-CoA reductase (NADPH) [EC:1.1.1.34] (A)	ko00900:Terpenoid backbone biosynthesis	[I]	Lipid transport and metabolism	Hydroxymethylglutaryl-coenzyme A reductase;; Hydroxymethylglutaryl-coenzyme A reductase;; Hydroxymethylglutaryl-coenzyme A reductase	3-hydroxy-3-methylglutaryl-coenzyme A reductase OS=Camptotheca acuminata (Happy tree) PE=3 SV=1	I	Lipid transport and metabolism	hypothetical protein MIMGU_mgv1a003590mg [Erythranthe guttata]
F01_cb8041_c25/f3p1/2059	[I]	Lipid transport and metabolism	Biological Process: maltose metabolic process (GO:0000023);; Biological Process: sulfur amino acid metabolic process (GO:0000096);; Biological Process: pentose-phosphate shunt (GO:0006098);; Biological Process: glycine catabolic process (GO:0006546);; Biological Process: unsaturated fatty acid biosynthetic process (GO:0006636);; Biological Process: phosphatidylglycerol biosynthetic process (GO:00…	K00099|0|sly:543682|DXR; 1-deoxy-D-xylulose-5-phosphate reductoisomerase; K00099 1-deoxy-D-xylulose-5-phosphate reductoisomerase [EC:1.1.1.267] (A)	ko00900:Terpenoid backbone biosynthesis	--	--	1-deoxy-D-xylulose 5-phosphate reductoisomerase;; DXP reductoisomerase C-terminal domain;; 1-deoxy-D-xylulose 5-phosphate reductoisomerase C-terminal	1-deoxy-D-xylulose 5-phosphate reductoisomerase, chloroplastic (Precursor) GN=DXR OS=Mentha piperita (Peppermint) PE=2 SV=2	I	Lipid transport and metabolism	PREDICTED: 1-deoxy-D-xylulose 5-phosphate reductoisomerase, chloroplastic [Sesamum indicum]
F02_cb3574_c15/f5p0/1650	[O]	Posttranslational modification, protein turnover, chaperones	Molecular Function: metalloendopeptidase activity (GO:0004222);; Cellular Component: vacuole (GO:0005773);; Cellular Component: endoplasmic reticulum (GO:0005783);; Biological Process: proteolysis (GO:0006508);; Cellular Component: membrane (GO:0016020);; Biological Process: CAAX-box protein processing (GO:0071586);;	K06013|3.35004e-160|pop:POPTR_0014s08490g|POPTRDRAFT_664019; CAAX protease family protein; K06013 STE24 endopeptidase [EC:3.4.24.84] (A)	ko00900:Terpenoid backbone biosynthesis	[R]	General function prediction only	Peptidase family M48	CAAX prenyl protease 1 homolog OS=Oryza sativa subsp. japonica (Rice) PE=2 SV=1	O	Posttranslational modification, protein turnover, chaperones	PREDICTED: CAAX prenyl protease 1 homolog [Nicotiana tomentosiformis]
F01_cb1421_c2/f1p0/3801	[I]	Lipid transport and metabolism	Molecular Function: nucleotide binding (GO:0000166);; Biological Process: phosphate-containing compound metabolic process (GO:0006796);; Biological Process: isoprenoid biosynthetic process (GO:0008299);; Cellular Component: plastid (GO:0009536);; Molecular Function: kinase activity (GO:0016301);;	K00919|1.3722e-94|tcc:TCM_040959|4-(cytidine 5'-phospho)-2-C-methyl-D-erithritol kinase; K00919 4-diphosphocytidyl-2-C-methyl-D-erythritol kinase [EC:2.7.1.148] (A)	ko00900:Terpenoid backbone biosynthesis	--	--	--	4-diphosphocytidyl-2-C-methyl-D-erythritol kinase, chloroplastic (Precursor) GN=ISPE OS=Mentha piperita (Peppermint) PE=1 SV=1	I	Lipid transport and metabolism	RecName: Full=4-diphosphocytidyl-2-C-methyl-D-erythritol kinase, chloroplastic; AltName: Full=4-(cytidine-5&apos;-diphospho)-2-C-methyl-D-erythritol kinase; Short=CMK; Flags: Precursor [Mentha x piperita]
F01_cb16438_c11039/f1p1/2207	[I]	Lipid transport and metabolism	Molecular Function: hydroxymethylglutaryl-CoA reductase (NADPH) activity (GO:0004420);; Cellular Component: endoplasmic reticulum membrane (GO:0005789);; Biological Process: isoprenoid biosynthetic process (GO:0008299);; Biological Process: coenzyme A metabolic process (GO:0015936);; Cellular Component: integral component of membrane (GO:0016021);; Molecular Function: NADP binding (GO:0050661);; …	K00021|0|sot:102577899|3-hydroxy-3-methylglutaryl coenzyme A reductase; K00021 hydroxymethylglutaryl-CoA reductase (NADPH) [EC:1.1.1.34] (A)	ko00900:Terpenoid backbone biosynthesis	[I]	Lipid transport and metabolism	Hydroxymethylglutaryl-coenzyme A reductase	3-hydroxy-3-methylglutaryl-coenzyme A reductase OS=Camptotheca acuminata (Happy tree) PE=3 SV=1	I	Lipid transport and metabolism	hypothetical protein MIMGU_mgv1a003590mg [Erythranthe guttata]
F01_cb17542_c0/f2p0/1171	[I]	Lipid transport and metabolism	Biological Process: sulfur amino acid metabolic process (GO:0000096);; Biological Process: MAPK cascade (GO:0000165);; Molecular Function: iron ion binding (GO:0005506);; Biological Process: pentose-phosphate shunt (GO:0006098);; Biological Process: regulation of translation (GO:0006417);; Biological Process: glycine catabolic process (GO:0006546);; Biological Process: protein targeting to membra…	K03526|1.02003e-172|pmum:103344199|4-hydroxy-3-methylbut-2-en-1-yl diphosphate synthase, chloroplastic-like; K03526 (E)-4-hydroxy-3-methylbut-2-enyl-diphosphate synthase [EC:1.17.7.1 1.17.7.3] (A)	ko00900:Terpenoid backbone biosynthesis	--	--	GcpE protein	4-hydroxy-3-methylbut-2-en-1-yl diphosphate synthase, chloroplastic (Precursor) GN=MUP24.2 OS=Arabidopsis thaliana (Mouse-ear cress) PE=1 SV=1	I	Lipid transport and metabolism	(E)-4-hydroxy-3-methylbut-2-enyl diphosphate synthase [Salvia miltiorrhiza f. alba]
F02_cb4839_c4/f1p1/2842	--	--	Biological Process: isoprenoid biosynthetic process (GO:0008299);; Molecular Function: transferase activity (GO:0016740);;	K00787|3.49923e-20|mus:103979965|farnesyl pyrophosphate synthase 1-like; K00787 farnesyl diphosphate synthase [EC:2.5.1.1 2.5.1.10] (A)	ko00900:Terpenoid backbone biosynthesis	[H]	Coenzyme transport and metabolism	Polyprenyl synthetase	Farnesyl pyrophosphate synthase 2 GN=FPS2 OS=Lupinus albus (White lupin) PE=2 SV=1	H	Coenzyme transport and metabolism	farnesyl diphosphate synthase [Lavandula angustifolia]
F02_cb1130_c6/f1p0/1153	--	--	Biological Process: protein metabolic process (GO:0019538);;	K08658|3.05094e-84|sly:101259663|CAAX prenyl protease 2; K08658 prenyl protein peptidase [EC:3.4.22.-] (A)	ko00900:Terpenoid backbone biosynthesis	[O]	Posttranslational modification, protein turnover, chaperones	CAAX protease self-immunity	CAAX prenyl protease 2 GN=F2H17 OS=Arabidopsis thaliana (Mouse-ear cress) PE=2 SV=2	O	Posttranslational modification, protein turnover, chaperones	PREDICTED: CAAX prenyl protease 2 [Sesamum indicum]
F01_cb17470_c2/f2p0/481	[I]	Lipid transport and metabolism	Molecular Function: hydroxymethylglutaryl-CoA reductase (NADPH) activity (GO:0004420);; Cellular Component: endoplasmic reticulum membrane (GO:0005789);; Biological Process: isoprenoid biosynthetic process (GO:0008299);; Biological Process: coenzyme A metabolic process (GO:0015936);; Cellular Component: integral component of membrane (GO:0016021);; Cellular Component: mitochondrial membrane (GO:0…	K00021|1.48968e-17|vvi:100245191|3-hydroxy-3-methylglutaryl-coenzyme A reductase; K00021 hydroxymethylglutaryl-CoA reductase (NADPH) [EC:1.1.1.34] (A)	ko00900:Terpenoid backbone biosynthesis	[I]	Lipid transport and metabolism	--	3-hydroxy-3-methylglutaryl-coenzyme A reductase 2 (Fragment) GN=HMGR2 OS=Hevea brasiliensis (Para rubber tree) PE=2 SV=1	I	Lipid transport and metabolism	RecName: Full=3-hydroxy-3-methylglutaryl-coenzyme A reductase 2; Short=HMG-CoA reductase 2, partial [Hevea brasiliensis]
F01_cb16438_c4582/f1p0/2126	[I]	Lipid transport and metabolism	Molecular Function: iron ion binding (GO:0005506);; Biological Process: terpenoid biosynthetic process (GO:0016114);; Molecular Function: 4-hydroxy-3-methylbut-2-en-1-yl diphosphate synthase activity (GO:0046429);; Biological Process: oxidation-reduction process (GO:0055114);;	K03526|0|gmx:100801743|4-hydroxy-3-methylbut-2-en-1-yl diphosphate synthase, chloroplastic-like; K03526 (E)-4-hydroxy-3-methylbut-2-enyl-diphosphate synthase [EC:1.17.7.1 1.17.7.3] (A)	ko00900:Terpenoid backbone biosynthesis	--	--	GcpE protein	4-hydroxy-3-methylbut-2-en-1-yl diphosphate synthase, chloroplastic (Precursor) GN=MUP24.2 OS=Arabidopsis thaliana (Mouse-ear cress) PE=1 SV=1	I	Lipid transport and metabolism	hypothetical protein POPTR_0009s01900g [Populus trichocarpa]
F02_cb11041_c50444/f2p0/2273	[I]	Lipid transport and metabolism	Molecular Function: hydroxymethylglutaryl-CoA reductase (NADPH) activity (GO:0004420);; Cellular Component: endoplasmic reticulum membrane (GO:0005789);; Biological Process: isoprenoid biosynthetic process (GO:0008299);; Biological Process: coenzyme A metabolic process (GO:0015936);; Cellular Component: integral component of membrane (GO:0016021);; Molecular Function: NADP binding (GO:0050661);; …	K00021|4.7901e-180|tcc:TCM_034814|Hydroxy methylglutaryl CoA reductase 1; K00021 hydroxymethylglutaryl-CoA reductase (NADPH) [EC:1.1.1.34] (A)	ko00900:Terpenoid backbone biosynthesis	[I]	Lipid transport and metabolism	Hydroxymethylglutaryl-coenzyme A reductase;; Hydroxymethylglutaryl-coenzyme A reductase;; Hydroxymethylglutaryl-coenzyme A reductase	3-hydroxy-3-methylglutaryl-coenzyme A reductase OS=Camptotheca acuminata (Happy tree) PE=3 SV=1	I	Lipid transport and metabolism	3-hydroxy-3-methylglutaryl coenzyme A reductase 1 [Pyrus pyrifolia]
F01_cb4189_c23/f1p0/959	[H]	Coenzyme transport and metabolism	Molecular Function: dimethylallyltranstransferase activity (GO:0004161);; Molecular Function: geranyltranstransferase activity (GO:0004337);; Biological Process: isoprenoid biosynthetic process (GO:0008299);;	K00787|6.40948e-133|vvi:100232975|farnesyl diphosphate synthase; K00787 farnesyl diphosphate synthase [EC:2.5.1.1 2.5.1.10] (A)	ko00900:Terpenoid backbone biosynthesis	[H]	Coenzyme transport and metabolism	Polyprenyl synthetase	Farnesyl pyrophosphate synthase 1 GN=FPS1 OS=Lupinus albus (White lupin) PE=2 SV=1	H	Coenzyme transport and metabolism	farnesyl diphosphate synthetase [Salvia miltiorrhiza]
F02_cb4839_c15/f8p2/1412	[H]	Coenzyme transport and metabolism	Molecular Function: dimethylallyltranstransferase activity (GO:0004161);; Molecular Function: geranyltranstransferase activity (GO:0004337);; Biological Process: isoprenoid biosynthetic process (GO:0008299);;	K00787|0|cmo:103501295|farnesyl pyrophosphate synthase 1; K00787 farnesyl diphosphate synthase [EC:2.5.1.1 2.5.1.10] (A)	ko00900:Terpenoid backbone biosynthesis	[H]	Coenzyme transport and metabolism	Polyprenyl synthetase	Farnesyl pyrophosphate synthase 1 GN=FPS1 OS=Lupinus albus (White lupin) PE=2 SV=1	H	Coenzyme transport and metabolism	farnesyl diphosphate synthetase [Salvia miltiorrhiza]
F01_cb16438_c44387/f1p0/2723	[I]	Lipid transport and metabolism	Molecular Function: transferase activity, transferring alkyl or aryl (other than methyl) groups (GO:0016765);;	K11778|1.01811e-86|pmum:103334495|dehydrodolichyl diphosphate synthase 6-like; K11778 ditrans,polycis-polyprenyl diphosphate synthase [EC:2.5.1.87] (A)	ko00900:Terpenoid backbone biosynthesis	[I]	Lipid transport and metabolism	Putative undecaprenyl diphosphate synthase	Dehydrodolichyl diphosphate synthase 6 GN=At2g17570 OS=Arabidopsis thaliana (Mouse-ear cress) PE=2 SV=2	I	Lipid transport and metabolism	hypothetical protein MIMGU_mgv1a011616mg [Erythranthe guttata]
F01_cb12873_c3/f1p0/1267	[I]	Lipid transport and metabolism	Molecular Function: transferase activity, transferring alkyl or aryl (other than methyl) groups (GO:0016765);;	K11778|1.1119e-136|pmum:103334495|dehydrodolichyl diphosphate synthase 6-like; K11778 ditrans,polycis-polyprenyl diphosphate synthase [EC:2.5.1.87] (A)	ko00900:Terpenoid backbone biosynthesis	[I]	Lipid transport and metabolism	Putative undecaprenyl diphosphate synthase	Dehydrodolichyl diphosphate synthase 6 GN=At2g17570 OS=Arabidopsis thaliana (Mouse-ear cress) PE=2 SV=2	I	Lipid transport and metabolism	PREDICTED: dehydrodolichyl diphosphate synthase 6 [Sesamum indicum]
F02_cb11946_c11/f1p0/1890	[H]	Coenzyme transport and metabolism	Molecular Function: dimethylallyltranstransferase activity (GO:0004161);; Molecular Function: farnesyltranstransferase activity (GO:0004311);; Molecular Function: geranyltranstransferase activity (GO:0004337);; Biological Process: phospholipid biosynthetic process (GO:0008654);; Cellular Component: plastid (GO:0009536);; Biological Process: terpenoid biosynthetic process (GO:0016114);;	K13789|5.46021e-136|pxb:103967631|geranylgeranyl pyrophosphate synthase, chloroplastic-like; K13789 geranylgeranyl diphosphate synthase, type II [EC:2.5.1.1 2.5.1.10 2.5.1.29] (A)	ko00900:Terpenoid backbone biosynthesis	[H]	Coenzyme transport and metabolism	Polyprenyl synthetase	Geranylgeranyl pyrophosphate synthase, chloroplastic (Precursor) GN=GGPS1 OS=Capsicum annuum (Bell pepper) PE=3 SV=1	H	Coenzyme transport and metabolism	PREDICTED: geranylgeranyl pyrophosphate synthase, chloroplastic-like [Sesamum indicum]
F01_cb3740_c7/f1p1/2141	[I]	Lipid transport and metabolism	Molecular Function: phosphomevalonate kinase activity (GO:0004631);; Molecular Function: ATP binding (GO:0005524);; Biological Process: sterol biosynthetic process (GO:0016126);; Biological Process: phosphorylation (GO:0016310);; Biological Process: pentacyclic triterpenoid biosynthetic process (GO:0019745);;	K00938|0|sly:101256682|probable phosphomevalonate kinase; K00938 phosphomevalonate kinase [EC:2.7.4.2] (A)	ko00900:Terpenoid backbone biosynthesis	[I]	Lipid transport and metabolism	GHMP kinases N terminal domain;; GHMP kinases C terminal	--	I	Lipid transport and metabolism	5-phosphomevalonate kinase [Salvia miltiorrhiza]
F02_cb13678_c1/f1p0/1324	[I]	Lipid transport and metabolism	Biological Process: sulfur amino acid metabolic process (GO:0000096);; Biological Process: glycine catabolic process (GO:0006546);; Biological Process: unsaturated fatty acid biosynthetic process (GO:0006636);; Biological Process: oxidoreduction coenzyme metabolic process (GO:0006733);; Biological Process: vitamin metabolic process (GO:0006766);; Biological Process: cellular amino acid biosynthet…	K00991|1.13675e-139|sot:102588399|2-C-methyl-D-erythritol 4-phosphate cytidylyltransferase, chloroplastic-like; K00991 2-C-methyl-D-erythritol 4-phosphate cytidylyltransferase [EC:2.7.7.60] (A)	ko00900:Terpenoid backbone biosynthesis	--	--	2-C-methyl-D-erythritol 4-phosphate cytidylyltransferase;; MobA-like NTP transferase domain	2-C-methyl-D-erythritol 4-phosphate cytidylyltransferase, chloroplastic (Precursor) GN=T8K22.20 OS=Arabidopsis thaliana (Mouse-ear cress) PE=1 SV=1	I	Lipid transport and metabolism	hypothetical protein MIMGU_mgv1a010477mg [Erythranthe guttata]
F02_cb3805_c1/f1p1/1637	[O]	Posttranslational modification, protein turnover, chaperones	Molecular Function: prenyltransferase activity (GO:0004659);; Biological Process: response to abscisic acid (GO:0009737);; Biological Process: protein prenylation (GO:0018342);; Biological Process: single-organism cellular process (GO:0044763);; Biological Process: regulation of cellular process (GO:0050794);;	K05954|1.68088e-176|vvi:100266301|protein farnesyltransferase subunit beta; K05954 protein farnesyltransferase subunit beta [EC:2.5.1.58] (A)	ko00900:Terpenoid backbone biosynthesis	[O]	Posttranslational modification, protein turnover, chaperones	Prenyltransferase and squalene oxidase repeat;; Prenyltransferase-like;; Prenyltransferase-like	Protein farnesyltransferase subunit beta GN=FTB OS=Pisum sativum (Garden pea) PE=1 SV=1	O	Posttranslational modification, protein turnover, chaperones	PREDICTED: protein farnesyltransferase subunit beta [Sesamum indicum]
F01_cb8147_c0/f1p0/2328	[H]	Coenzyme transport and metabolism	Molecular Function: dimethylallyltranstransferase activity (GO:0004161);; Biological Process: isoprenoid biosynthetic process (GO:0008299);; Molecular Function: 2-alkenal reductase [NAD(P)] activity (GO:0032440);; Biological Process: oxidation-reduction process (GO:0055114);;	K13789|1.43038e-145|sly:778310|GGPS1; geranylgeranyl pyrophosphate synthase 1; K13789 geranylgeranyl diphosphate synthase, type II [EC:2.5.1.1 2.5.1.10 2.5.1.29] (A)	ko00900:Terpenoid backbone biosynthesis	[H]	Coenzyme transport and metabolism	Glutathione S-transferase, N-terminal domain;; Glutathione S-transferase, N-terminal domain;; Glutathione S-transferase, C-terminal domain;; Glutathione S-transferase, N-terminal domain	Geranylgeranyl pyrophosphate synthase, chloroplastic (Precursor) GN=GGPS OS=Hevea brasiliensis (Para rubber tree) PE=1 SV=1	H	Coenzyme transport and metabolism	hypothetical protein MIMGU_mgv1a018377mg [Erythranthe guttata]
F01_cb13703_c6/f1p0/2768	--	--	--	K11778|3.66684e-56|sot:102596985|nogo-B receptor-like; K11778 ditrans,polycis-polyprenyl diphosphate synthase [EC:2.5.1.87] (A)	ko00900:Terpenoid backbone biosynthesis	--	--	--	--	S	Function unknown	PREDICTED: dehydrodolichyl diphosphate syntase complex subunit nus1-like [Sesamum indicum]
F01_cb9082_c0/f1p0/2194	[I]	Lipid transport and metabolism	Molecular Function: hydroxymethylglutaryl-CoA reductase (NADPH) activity (GO:0004420);; Biological Process: isoprenoid biosynthetic process (GO:0008299);; Biological Process: coenzyme A metabolic process (GO:0015936);; Cellular Component: integral component of membrane (GO:0016021);; Molecular Function: NADP binding (GO:0050661);; Biological Process: oxidation-reduction process (GO:0055114);;	K00021|0|fve:101308723|3-hydroxy-3-methylglutaryl-coenzyme A reductase 2-like; K00021 hydroxymethylglutaryl-CoA reductase (NADPH) [EC:1.1.1.34] (A)	ko00900:Terpenoid backbone biosynthesis	[I]	Lipid transport and metabolism	Hydroxymethylglutaryl-coenzyme A reductase	3-hydroxy-3-methylglutaryl-coenzyme A reductase OS=Camptotheca acuminata (Happy tree) PE=3 SV=1	I	Lipid transport and metabolism	3-hydroxy-3-methylglutaryl coenzyme A [Taraxacum kok-saghyz]
F02_cb11041_c4928/f3p3/2763	[I]	Lipid transport and metabolism	Biological Process: sulfur amino acid metabolic process (GO:0000096);; Biological Process: MAPK cascade (GO:0000165);; Molecular Function: iron ion binding (GO:0005506);; Biological Process: pentose-phosphate shunt (GO:0006098);; Biological Process: regulation of translation (GO:0006417);; Biological Process: glycine catabolic process (GO:0006546);; Biological Process: protein targeting to membra…	K03526|0|mdm:103413028|4-hydroxy-3-methylbut-2-en-1-yl diphosphate synthase, chloroplastic; K03526 (E)-4-hydroxy-3-methylbut-2-enyl-diphosphate synthase [EC:1.17.7.1 1.17.7.3] (A)	ko00900:Terpenoid backbone biosynthesis	--	--	GcpE protein	4-hydroxy-3-methylbut-2-en-1-yl diphosphate synthase, chloroplastic (Precursor) GN=MUP24.2 OS=Arabidopsis thaliana (Mouse-ear cress) PE=1 SV=1	I	Lipid transport and metabolism	(E)-4-hydroxy-3-methylbut-2-enyl diphosphate synthase [Salvia miltiorrhiza f. alba]
F01_cb16438_c45811/f3p2/1790	[IM]	--	Biological Process: isopentenyl diphosphate biosynthetic process, methylerythritol 4-phosphate pathway (GO:0019288);; Biological Process: oxidation-reduction process (GO:0055114);;	K03527|0|vvi:100267479|4-hydroxy-3-methylbut-2-enyl diphosphate reductase, chloroplastic; K03527 4-hydroxy-3-methylbut-2-enyl diphosphate reductase [EC:1.17.1.2] (A)	ko00900:Terpenoid backbone biosynthesis	--	--	LytB protein	4-hydroxy-3-methylbut-2-enyl diphosphate reductase, chloroplastic (Precursor) GN=F10M10.120 OS=Arabidopsis thaliana (Mouse-ear cress) PE=2 SV=1	I	Lipid transport and metabolism	PREDICTED: 4-hydroxy-3-methylbut-2-enyl diphosphate reductase, chloroplastic [Sesamum indicum]
F01_cb3740_c3/f1p2/3124	[I]	Lipid transport and metabolism	Molecular Function: phosphomevalonate kinase activity (GO:0004631);; Molecular Function: ATP binding (GO:0005524);; Biological Process: sterol biosynthetic process (GO:0016126);; Biological Process: phosphorylation (GO:0016310);; Biological Process: pentacyclic triterpenoid biosynthetic process (GO:0019745);;	K00938|5.95052e-134|sot:102593814|phosphomevalonate kinase-like; K00938 phosphomevalonate kinase [EC:2.7.4.2] (A)	ko00900:Terpenoid backbone biosynthesis	[I]	Lipid transport and metabolism	GHMP kinases N terminal domain;; GHMP kinases C terminal	--	I	Lipid transport and metabolism	5-phosphomevalonate kinase [Salvia miltiorrhiza]
F01_cb8041_c15/f1p0/1910	[I]	Lipid transport and metabolism	Cellular Component: chloroplast (GO:0009507);; Molecular Function: isomerase activity (GO:0016853);; Biological Process: isopentenyl diphosphate biosynthetic process, methylerythritol 4-phosphate pathway (GO:0019288);; Molecular Function: 1-deoxy-D-xylulose-5-phosphate reductoisomerase activity (GO:0030604);; Molecular Function: metal ion binding (GO:0046872);; Biological Process: oxidation-reduc…	K00099|0|sot:102596520|1-deoxy-D-xylulose 5-phosphate reductoisomerase, chloroplastic-like; K00099 1-deoxy-D-xylulose-5-phosphate reductoisomerase [EC:1.1.1.267] (A)	ko00900:Terpenoid backbone biosynthesis	--	--	1-deoxy-D-xylulose 5-phosphate reductoisomerase;; DXP reductoisomerase C-terminal domain;; 1-deoxy-D-xylulose 5-phosphate reductoisomerase C-terminal	1-deoxy-D-xylulose 5-phosphate reductoisomerase, chloroplastic (Precursor) GN=DXR OS=Mentha piperita (Peppermint) PE=2 SV=2	I	Lipid transport and metabolism	PREDICTED: 1-deoxy-D-xylulose 5-phosphate reductoisomerase, chloroplastic [Sesamum indicum]
F02_cb9382_c7/f1p0/1971	[I]	Lipid transport and metabolism	Molecular Function: phosphomevalonate kinase activity (GO:0004631);; Molecular Function: ATP binding (GO:0005524);; Biological Process: sterol biosynthetic process (GO:0016126);; Biological Process: phosphorylation (GO:0016310);; Biological Process: pentacyclic triterpenoid biosynthetic process (GO:0019745);;	K00938|0|sly:101256682|probable phosphomevalonate kinase; K00938 phosphomevalonate kinase [EC:2.7.4.2] (A)	ko00900:Terpenoid backbone biosynthesis	[I]	Lipid transport and metabolism	GHMP kinases N terminal domain;; GHMP kinases C terminal	--	I	Lipid transport and metabolism	5-phosphomevalonate kinase [Salvia miltiorrhiza]
F01_cb16438_c33871/f1p0/1741	[IM]	--	Biological Process: isopentenyl diphosphate biosynthetic process, methylerythritol 4-phosphate pathway (GO:0019288);; Biological Process: oxidation-reduction process (GO:0055114);;	K03527|0|vvi:100267479|4-hydroxy-3-methylbut-2-enyl diphosphate reductase, chloroplastic; K03527 4-hydroxy-3-methylbut-2-enyl diphosphate reductase [EC:1.17.1.2] (A)	ko00900:Terpenoid backbone biosynthesis	--	--	LytB protein	4-hydroxy-3-methylbut-2-enyl diphosphate reductase, chloroplastic (Precursor) GN=OSJNBa0079G12.18 OS=Oryza sativa subsp. japonica (Rice) PE=2 SV=1	I	Lipid transport and metabolism	PREDICTED: 4-hydroxy-3-methylbut-2-enyl diphosphate reductase, chloroplastic [Sesamum indicum]
F02_cb11041_c81338/f4p0/2053	[I]	Lipid transport and metabolism	Biological Process: maltose metabolic process (GO:0000023);; Biological Process: sulfur amino acid metabolic process (GO:0000096);; Biological Process: pentose-phosphate shunt (GO:0006098);; Biological Process: glycine catabolic process (GO:0006546);; Biological Process: unsaturated fatty acid biosynthetic process (GO:0006636);; Biological Process: phosphatidylglycerol biosynthetic process (GO:00…	K00099|0|sly:543682|DXR; 1-deoxy-D-xylulose-5-phosphate reductoisomerase; K00099 1-deoxy-D-xylulose-5-phosphate reductoisomerase [EC:1.1.1.267] (A)	ko00900:Terpenoid backbone biosynthesis	--	--	1-deoxy-D-xylulose 5-phosphate reductoisomerase;; DXP reductoisomerase C-terminal domain;; 1-deoxy-D-xylulose 5-phosphate reductoisomerase C-terminal	1-deoxy-D-xylulose 5-phosphate reductoisomerase, chloroplastic (Precursor) GN=DXR OS=Mentha piperita (Peppermint) PE=2 SV=2	I	Lipid transport and metabolism	PREDICTED: 1-deoxy-D-xylulose 5-phosphate reductoisomerase, chloroplastic [Sesamum indicum]
F01_cb12076_c19/f1p0/488	--	--	Molecular Function: metalloendopeptidase activity (GO:0004222);; Cellular Component: vacuole (GO:0005773);; Cellular Component: endoplasmic reticulum (GO:0005783);; Biological Process: proteolysis (GO:0006508);; Cellular Component: membrane (GO:0016020);; Biological Process: CAAX-box protein processing (GO:0071586);;	K06013|1.38594e-12|ppp:PHYPADRAFT_172674|hypothetical protein; K06013 STE24 endopeptidase [EC:3.4.24.84] (A)	ko00900:Terpenoid backbone biosynthesis	[R]	General function prediction only	--	CAAX prenyl protease 1 homolog OS=Oryza sativa subsp. japonica (Rice) PE=2 SV=1	O	Posttranslational modification, protein turnover, chaperones	putative CAAX prenyl protease [Gossypium herbaceum]
F01_cb16438_c38509/f2p7/2568	[I]	Lipid transport and metabolism	Molecular Function: iron ion binding (GO:0005506);; Biological Process: terpenoid biosynthetic process (GO:0016114);; Molecular Function: 4-hydroxy-3-methylbut-2-en-1-yl diphosphate synthase activity (GO:0046429);; Biological Process: oxidation-reduction process (GO:0055114);;	K03526|0|rcu:RCOM_0154370|4-hydroxy-3-methylbut-2-en-1-yl diphosphate synthase, putative (EC:1.17.4.3); K03526 (E)-4-hydroxy-3-methylbut-2-enyl-diphosphate synthase [EC:1.17.7.1 1.17.7.3] (A)	ko00900:Terpenoid backbone biosynthesis	--	--	GcpE protein;; GcpE protein	4-hydroxy-3-methylbut-2-en-1-yl diphosphate synthase, chloroplastic (Precursor) GN=MUP24.2 OS=Arabidopsis thaliana (Mouse-ear cress) PE=1 SV=1	I	Lipid transport and metabolism	(E)-4-hydroxy-3-methylbut-2-enyl diphosphate synthase [Salvia miltiorrhiza f. alba]
F01_cb16438_c38899/f1p1/2274	[I]	Lipid transport and metabolism	Molecular Function: hydroxymethylglutaryl-CoA reductase (NADPH) activity (GO:0004420);; Cellular Component: endoplasmic reticulum membrane (GO:0005789);; Biological Process: isoprenoid biosynthetic process (GO:0008299);; Biological Process: coenzyme A metabolic process (GO:0015936);; Cellular Component: integral component of membrane (GO:0016021);; Molecular Function: NADP binding (GO:0050661);; …	K00021|0|sot:102577467|HMG3, HMG3.3; HMG-CoA reductase (EC:1.1.1.34); K00021 hydroxymethylglutaryl-CoA reductase (NADPH) [EC:1.1.1.34] (A)	ko00900:Terpenoid backbone biosynthesis	[I]	Lipid transport and metabolism	Hydroxymethylglutaryl-coenzyme A reductase	3-hydroxy-3-methylglutaryl-coenzyme A reductase GN=HMGR OS=Nicotiana sylvestris (Wood tobacco) PE=2 SV=1	I	Lipid transport and metabolism	hypothetical protein MIMGU_mgv1a003590mg [Erythranthe guttata]
F02_cb3574_c5/f1p0/1705	[O]	Posttranslational modification, protein turnover, chaperones	Molecular Function: metalloendopeptidase activity (GO:0004222);; Cellular Component: vacuole (GO:0005773);; Cellular Component: endoplasmic reticulum (GO:0005783);; Biological Process: proteolysis (GO:0006508);; Biological Process: ER to Golgi vesicle-mediated transport (GO:0006888);; Cellular Component: membrane (GO:0016020);; Biological Process: CAAX-box protein processing (GO:0071586);;	K06013|0|pop:POPTR_0014s08490g|POPTRDRAFT_664019; CAAX protease family protein; K06013 STE24 endopeptidase [EC:3.4.24.84] (A)	ko00900:Terpenoid backbone biosynthesis	[R]	General function prediction only	Peptidase family M48	CAAX prenyl protease 1 homolog OS=Arabidopsis thaliana (Mouse-ear cress) PE=1 SV=1	O	Posttranslational modification, protein turnover, chaperones	PREDICTED: CAAX prenyl protease 1 homolog [Nicotiana tomentosiformis]
F01_cb16438_c34196/f2p2/2188	[I]	Lipid transport and metabolism	Molecular Function: hydroxymethylglutaryl-CoA reductase (NADPH) activity (GO:0004420);; Cellular Component: endoplasmic reticulum membrane (GO:0005789);; Biological Process: isoprenoid biosynthetic process (GO:0008299);; Biological Process: coenzyme A metabolic process (GO:0015936);; Cellular Component: integral component of membrane (GO:0016021);; Molecular Function: NADP binding (GO:0050661);; …	K00021|0|sot:102577889|HMG2, HMG2.2; HMG-CoA reductase (EC:1.1.1.34); K00021 hydroxymethylglutaryl-CoA reductase (NADPH) [EC:1.1.1.34] (A)	ko00900:Terpenoid backbone biosynthesis	[I]	Lipid transport and metabolism	Hydroxymethylglutaryl-coenzyme A reductase;; Hydroxymethylglutaryl-coenzyme A reductase;; Hydroxymethylglutaryl-coenzyme A reductase;; Hydroxymethylglutaryl-coenzyme A reductase	3-hydroxy-3-methylglutaryl-coenzyme A reductase OS=Camptotheca acuminata (Happy tree) PE=3 SV=1	I	Lipid transport and metabolism	hypothetical protein MIMGU_mgv1a003590mg [Erythranthe guttata]
F01_cb5952_c2/f1p0/2676	[I]	Lipid transport and metabolism	Molecular Function: oxidoreductase activity (GO:0016491);; Cellular Component: organelle membrane (GO:0031090);; Cellular Component: intracellular membrane-bounded organelle (GO:0043231);; Cellular Component: cytoplasmic part (GO:0044444);; Cellular Component: intracellular organelle part (GO:0044446);; Biological Process: single-organism metabolic process (GO:0044710);;	K00021|0|pper:PRUPE_ppa002715mg|hypothetical protein; K00021 hydroxymethylglutaryl-CoA reductase (NADPH) [EC:1.1.1.34] (A)	ko00900:Terpenoid backbone biosynthesis	[I]	Lipid transport and metabolism	Hydroxymethylglutaryl-coenzyme A reductase;; Hydroxymethylglutaryl-coenzyme A reductase;; Hydroxymethylglutaryl-coenzyme A reductase	3-hydroxy-3-methylglutaryl-coenzyme A reductase OS=Camptotheca acuminata (Happy tree) PE=3 SV=1	I	Lipid transport and metabolism	hypothetical protein PRUPE_ppa002715mg [Prunus persica]
F02_cb11041_c57533/f1p0/1445	[I]	Lipid transport and metabolism	Molecular Function: hydroxymethylglutaryl-CoA reductase (NADPH) activity (GO:0004420);; Cellular Component: endoplasmic reticulum membrane (GO:0005789);; Biological Process: isoprenoid biosynthetic process (GO:0008299);; Biological Process: coenzyme A metabolic process (GO:0015936);; Cellular Component: integral component of membrane (GO:0016021);; Molecular Function: NADP binding (GO:0050661);; …	K00021|4.74738e-148|sot:102577899|3-hydroxy-3-methylglutaryl coenzyme A reductase; K00021 hydroxymethylglutaryl-CoA reductase (NADPH) [EC:1.1.1.34] (A)	ko00900:Terpenoid backbone biosynthesis	[I]	Lipid transport and metabolism	Hydroxymethylglutaryl-coenzyme A reductase	3-hydroxy-3-methylglutaryl-coenzyme A reductase OS=Camptotheca acuminata (Happy tree) PE=3 SV=1	I	Lipid transport and metabolism	hypothetical protein MIMGU_mgv1a003590mg [Erythranthe guttata]
F01_cb1421_c3/f1p0/1748	[I]	Lipid transport and metabolism	Molecular Function: ATP binding (GO:0005524);; Biological Process: heme biosynthetic process (GO:0006783);; Cellular Component: chloroplast (GO:0009507);; Cellular Component: chromoplast (GO:0009509);; Biological Process: response to blue light (GO:0009637);; Biological Process: response to high light intensity (GO:0009644);; Biological Process: response to sucrose (GO:0009744);; Biological Proce…	K00919|3.43831e-172|sot:102601451|4-diphosphocytidyl-2-C-methyl-D-erythritol kinase, chloroplastic/chromoplastic-like; K00919 4-diphosphocytidyl-2-C-methyl-D-erythritol kinase [EC:2.7.1.148] (A)	ko00900:Terpenoid backbone biosynthesis	--	--	GHMP kinases N terminal domain	4-diphosphocytidyl-2-C-methyl-D-erythritol kinase, chloroplastic (Precursor) GN=ISPE OS=Mentha piperita (Peppermint) PE=1 SV=1	I	Lipid transport and metabolism	4-diphosphocytidyl-2-C-methyl-D-erythritol kinase [Salvia miltiorrhiza]
F01_cb9129_c6/f1p0/1195	[I]	Lipid transport and metabolism	Molecular Function: isopentenyl-diphosphate delta-isomerase activity (GO:0004452);; Biological Process: isoprenoid biosynthetic process (GO:0008299);; Biological Process: photosynthesis (GO:0015979);; Biological Process: chlorophyll biosynthetic process (GO:0015995);; Molecular Function: hydrolase activity (GO:0016787);; Molecular Function: metal ion binding (GO:0046872);; Biological Process: dim…	K01823|6.63385e-163|mdm:103414031|isopentenyl-diphosphate Delta-isomerase I-like; K01823 isopentenyl-diphosphate delta-isomerase [EC:5.3.3.2] (A)	ko00900:Terpenoid backbone biosynthesis	[Q]	Secondary metabolites biosynthesis, transport and catabolism	NUDIX domain	Isopentenyl-diphosphate Delta-isomerase II GN=IPI2 OS=Camptotheca acuminata (Happy tree) PE=2 SV=1	I	Lipid transport and metabolism	isopentenyl diphosphate isomerase 2 [Panax notoginseng]
F02_cb11607_c8/f1p0/1269	[I]	Lipid transport and metabolism	Molecular Function: isopentenyl-diphosphate delta-isomerase activity (GO:0004452);; Biological Process: isoprenoid biosynthetic process (GO:0008299);; Biological Process: photosynthesis (GO:0015979);; Biological Process: chlorophyll biosynthetic process (GO:0015995);; Molecular Function: hydrolase activity (GO:0016787);; Molecular Function: metal ion binding (GO:0046872);; Biological Process: dim…	K01823|5.38084e-116|gmx:100783078|isopentenyl-diphosphate Delta-isomerase II-like; K01823 isopentenyl-diphosphate delta-isomerase [EC:5.3.3.2] (A)	ko00900:Terpenoid backbone biosynthesis	[Q]	Secondary metabolites biosynthesis, transport and catabolism	NUDIX domain	Isopentenyl-diphosphate Delta-isomerase II GN=IPI2 OS=Camptotheca acuminata (Happy tree) PE=2 SV=1	I	Lipid transport and metabolism	PREDICTED: isopentenyl-diphosphate Delta-isomerase I [Sesamum indicum]
F02_cb11946_c25/f1p0/1801	[H]	Coenzyme transport and metabolism	Molecular Function: dimethylallyltranstransferase activity (GO:0004161);; Molecular Function: farnesyltranstransferase activity (GO:0004311);; Molecular Function: geranyltranstransferase activity (GO:0004337);; Biological Process: phospholipid biosynthetic process (GO:0008654);; Cellular Component: plastid (GO:0009536);; Biological Process: terpenoid biosynthetic process (GO:0016114);;	K13789|2.60294e-136|pxb:103967631|geranylgeranyl pyrophosphate synthase, chloroplastic-like; K13789 geranylgeranyl diphosphate synthase, type II [EC:2.5.1.1 2.5.1.10 2.5.1.29] (A)	ko00900:Terpenoid backbone biosynthesis	[H]	Coenzyme transport and metabolism	Polyprenyl synthetase	Geranylgeranyl pyrophosphate synthase, chloroplastic (Precursor) GN=GGPS1 OS=Capsicum annuum (Bell pepper) PE=3 SV=1	H	Coenzyme transport and metabolism	PREDICTED: geranylgeranyl pyrophosphate synthase, chloroplastic-like [Sesamum indicum]
F02_cb10218_c1/f3p0/1804	[H]	Coenzyme transport and metabolism	Molecular Function: dimethylallyltranstransferase activity (GO:0004161);; Biological Process: ubiquinone biosynthetic process (GO:0006744);; Biological Process: isoprenoid biosynthetic process (GO:0008299);; Cellular Component: chloroplast (GO:0009507);; Biological Process: embryo development (GO:0009790);; Molecular Function: trans-octaprenyltranstransferase activity (GO:0050347);;	K14066|2.55e-167|sot:102588989|solanesyl diphosphate synthase 3, chloroplastic/mitochondrial-like; K14066 geranyl diphosphate synthase [EC:2.5.1.1] (A)	ko00900:Terpenoid backbone biosynthesis	[H]	Coenzyme transport and metabolism	Polyprenyl synthetase	Solanesyl diphosphate synthase 3, chloroplastic/mitochondrial (Precursor) GN=T31E10.3 OS=Arabidopsis thaliana (Mouse-ear cress) PE=1 SV=1	H	Coenzyme transport and metabolism	PREDICTED: solanesyl diphosphate synthase 3, chloroplastic/mitochondrial isoform X1 [Sesamum indicum]
F01_cb16438_c58226/f1p1/2266	[IM]	--	Biological Process: isopentenyl diphosphate biosynthetic process, methylerythritol 4-phosphate pathway (GO:0019288);; Biological Process: oxidation-reduction process (GO:0055114);;	K03527|2.12999e-151|vvi:100267479|4-hydroxy-3-methylbut-2-enyl diphosphate reductase, chloroplastic; K03527 4-hydroxy-3-methylbut-2-enyl diphosphate reductase [EC:1.17.1.2] (A)	ko00900:Terpenoid backbone biosynthesis	--	--	LytB protein;; LytB protein;; LytB protein	4-hydroxy-3-methylbut-2-enyl diphosphate reductase, chloroplastic (Precursor) GN=F10M10.120 OS=Arabidopsis thaliana (Mouse-ear cress) PE=2 SV=1	I	Lipid transport and metabolism	hypothetical protein MIMGU_mgv1a005937mg [Erythranthe guttata]
F01_cb9129_c3/f1p0/1987	[I]	Lipid transport and metabolism	Molecular Function: isopentenyl-diphosphate delta-isomerase activity (GO:0004452);; Biological Process: isoprenoid biosynthetic process (GO:0008299);; Molecular Function: hydrolase activity (GO:0016787);;	K01823|3.05427e-79|sly:100134905|IPI; isopentenyl diphosphate isomerase (EC:5.3.3.2); K01823 isopentenyl-diphosphate delta-isomerase [EC:5.3.3.2] (A)	ko00900:Terpenoid backbone biosynthesis	[Q]	Secondary metabolites biosynthesis, transport and catabolism	--	Isopentenyl-diphosphate Delta-isomerase II GN=IPI2 OS=Camptotheca acuminata (Happy tree) PE=2 SV=1	I	Lipid transport and metabolism	isopentenyl diphosphate isomerase [Solanum lycopersicum]
F02_cb7697_c26/f1p0/1684	[IM]	--	Cellular Component: chloroplast stroma (GO:0009570);; Biological Process: isopentenyl diphosphate biosynthetic process, methylerythritol 4-phosphate pathway (GO:0019288);; Molecular Function: 4-hydroxy-3-methylbut-2-en-1-yl diphosphate synthase activity (GO:0046429);; Biological Process: response to antibiotic (GO:0046677);; Molecular Function: 4-hydroxy-3-methylbut-2-en-1-yl diphosphate reductas…	K03527|0|sly:100316901|ISPH protein; K03527 4-hydroxy-3-methylbut-2-enyl diphosphate reductase [EC:1.17.1.2] (A)	ko00900:Terpenoid backbone biosynthesis	--	--	LytB protein	4-hydroxy-3-methylbut-2-enyl diphosphate reductase, chloroplastic (Precursor) GN=F10M10.120 OS=Arabidopsis thaliana (Mouse-ear cress) PE=2 SV=1	I	Lipid transport and metabolism	PREDICTED: 4-hydroxy-3-methylbut-2-enyl diphosphate reductase, chloroplastic-like [Sesamum indicum]
F02_cb8500_c5/f1p0/2123	[I]	Lipid transport and metabolism	Cellular Component: Golgi membrane (GO:0000139);; Molecular Function: carboxylic ester hydrolase activity (GO:0004091);; Cellular Component: extracellular region (GO:0005576);; Cellular Component: endoplasmic reticulum membrane (GO:0005789);; Biological Process: metabolic process (GO:0008152);; Biological Process: response to abscisic acid (GO:0009737);; Molecular Function: prenylcysteine methyle…	K15889|3.23394e-92|pop:POPTR_0010s14220g|POPTRDRAFT_822162; hypothetical protein; K15889 prenylcysteine alpha-carboxyl methylesterase [EC:3.1.1.-] (A)	ko00900:Terpenoid backbone biosynthesis	[R]	General function prediction only	Carboxylesterase family;; alpha/beta hydrolase fold	Probable isoprenylcysteine alpha-carbonyl methylesterase ICMEL2 GN=ICMEL2 OS=Arabidopsis thaliana (Mouse-ear cress) PE=2 SV=1	I	Lipid transport and metabolism	PREDICTED: probable isoprenylcysteine alpha-carbonyl methylesterase ICMEL1 isoform X1 [Populus euphratica]
F01_cb3740_c2/f3p1/1995	[I]	Lipid transport and metabolism	Molecular Function: ATP binding (GO:0005524);; Biological Process: sterol biosynthetic process (GO:0016126);; Molecular Function: kinase activity (GO:0016301);; Biological Process: phosphorylation (GO:0016310);; Biological Process: pentacyclic triterpenoid biosynthetic process (GO:0019745);;	K00938|0|pxb:103934000|phosphomevalonate kinase-like; K00938 phosphomevalonate kinase [EC:2.7.4.2] (A)	ko00900:Terpenoid backbone biosynthesis	[I]	Lipid transport and metabolism	GHMP kinases N terminal domain;; GHMP kinases C terminal	--	I	Lipid transport and metabolism	5-phosphomevalonate kinase [Salvia miltiorrhiza]
F01_cb15137_c1/f1p0/1577	[I]	Lipid transport and metabolism	--	K11778|2.29412e-128|sly:101244138|dehydrodolichyl diphosphate synthase 2-like; K11778 ditrans,polycis-polyprenyl diphosphate synthase [EC:2.5.1.87] (A)	ko00900:Terpenoid backbone biosynthesis	[I]	Lipid transport and metabolism	Putative undecaprenyl diphosphate synthase	Dehydrodolichyl diphosphate synthase 2 GN=At5g58770 OS=Arabidopsis thaliana (Mouse-ear cress) PE=2 SV=2	I	Lipid transport and metabolism	PREDICTED: dehydrodolichyl diphosphate synthase 2-like [Sesamum indicum]
F01_cb16438_c12352/f1p0/2166	[I]	Lipid transport and metabolism	Molecular Function: hydroxymethylglutaryl-CoA reductase (NADPH) activity (GO:0004420);; Cellular Component: endoplasmic reticulum membrane (GO:0005789);; Biological Process: isoprenoid biosynthetic process (GO:0008299);; Biological Process: coenzyme A metabolic process (GO:0015936);; Cellular Component: integral component of membrane (GO:0016021);; Molecular Function: NADP binding (GO:0050661);; …	K00021|0|sot:102577467|HMG3, HMG3.3; HMG-CoA reductase (EC:1.1.1.34); K00021 hydroxymethylglutaryl-CoA reductase (NADPH) [EC:1.1.1.34] (A)	ko00900:Terpenoid backbone biosynthesis	[I]	Lipid transport and metabolism	Hydroxymethylglutaryl-coenzyme A reductase	3-hydroxy-3-methylglutaryl-coenzyme A reductase GN=HMGR OS=Nicotiana sylvestris (Wood tobacco) PE=2 SV=1	I	Lipid transport and metabolism	hypothetical protein MIMGU_mgv1a003590mg [Erythranthe guttata]
F01_cb16438_c44119/f1p0/2732	[I]	Lipid transport and metabolism	Molecular Function: iron ion binding (GO:0005506);; Biological Process: terpenoid biosynthetic process (GO:0016114);; Molecular Function: 4-hydroxy-3-methylbut-2-en-1-yl diphosphate synthase activity (GO:0046429);; Biological Process: oxidation-reduction process (GO:0055114);;	K03526|0|mdm:103413028|4-hydroxy-3-methylbut-2-en-1-yl diphosphate synthase, chloroplastic; K03526 (E)-4-hydroxy-3-methylbut-2-enyl-diphosphate synthase [EC:1.17.7.1 1.17.7.3] (A)	ko00900:Terpenoid backbone biosynthesis	--	--	GcpE protein	4-hydroxy-3-methylbut-2-en-1-yl diphosphate synthase, chloroplastic (Precursor) GN=MUP24.2 OS=Arabidopsis thaliana (Mouse-ear cress) PE=1 SV=1	I	Lipid transport and metabolism	(E)-4-hydroxy-3-methylbut-2-enyl diphosphate synthase [Salvia miltiorrhiza f. alba]
F02_cb11041_c54062/f1p0/2703	[I]	Lipid transport and metabolism	Biological Process: sulfur amino acid metabolic process (GO:0000096);; Biological Process: MAPK cascade (GO:0000165);; Molecular Function: iron ion binding (GO:0005506);; Biological Process: pentose-phosphate shunt (GO:0006098);; Biological Process: regulation of translation (GO:0006417);; Biological Process: glycine catabolic process (GO:0006546);; Biological Process: protein targeting to membra…	K03526|0|mdm:103413028|4-hydroxy-3-methylbut-2-en-1-yl diphosphate synthase, chloroplastic; K03526 (E)-4-hydroxy-3-methylbut-2-enyl-diphosphate synthase [EC:1.17.7.1 1.17.7.3] (A)	ko00900:Terpenoid backbone biosynthesis	--	--	GcpE protein	4-hydroxy-3-methylbut-2-en-1-yl diphosphate synthase, chloroplastic (Precursor) GN=MUP24.2 OS=Arabidopsis thaliana (Mouse-ear cress) PE=1 SV=1	I	Lipid transport and metabolism	(E)-4-hydroxy-3-methylbut-2-enyl diphosphate synthase [Salvia miltiorrhiza f. alba]
F02_cb11041_c86099/f6p6/2671	[I]	Lipid transport and metabolism	Biological Process: sulfur amino acid metabolic process (GO:0000096);; Biological Process: MAPK cascade (GO:0000165);; Molecular Function: iron ion binding (GO:0005506);; Biological Process: pentose-phosphate shunt (GO:0006098);; Biological Process: regulation of translation (GO:0006417);; Biological Process: glycine catabolic process (GO:0006546);; Biological Process: protein targeting to membra…	K03526|0|mdm:103413028|4-hydroxy-3-methylbut-2-en-1-yl diphosphate synthase, chloroplastic; K03526 (E)-4-hydroxy-3-methylbut-2-enyl-diphosphate synthase [EC:1.17.7.1 1.17.7.3] (A)	ko00900:Terpenoid backbone biosynthesis	--	--	GcpE protein	4-hydroxy-3-methylbut-2-en-1-yl diphosphate synthase, chloroplastic (Precursor) GN=MUP24.2 OS=Arabidopsis thaliana (Mouse-ear cress) PE=1 SV=1	I	Lipid transport and metabolism	(E)-4-hydroxy-3-methylbut-2-enyl diphosphate synthase [Salvia miltiorrhiza f. alba]
F02_cb3805_c0/f1p0/3036	[O]	Posttranslational modification, protein turnover, chaperones	Molecular Function: prenyltransferase activity (GO:0004659);; Biological Process: protein prenylation (GO:0018342);; Biological Process: single-organism process (GO:0044699);; Biological Process: regulation of cellular process (GO:0050794);; Biological Process: response to oxygen-containing compound (GO:1901700);;	K05954|2.16413e-135|gmx:100814543|protein farnesyltransferase subunit beta-like; K05954 protein farnesyltransferase subunit beta [EC:2.5.1.58] (A)	ko00900:Terpenoid backbone biosynthesis	[O]	Posttranslational modification, protein turnover, chaperones	Prenyltransferase and squalene oxidase repeat;; Prenyltransferase and squalene oxidase repeat;; Prenyltransferase-like	Protein farnesyltransferase subunit beta GN=FTB OS=Pisum sativum (Garden pea) PE=1 SV=1	O	Posttranslational modification, protein turnover, chaperones	PREDICTED: protein farnesyltransferase subunit beta [Sesamum indicum]
F02_cb11041_c51198/f1p0/1875	[I]	Lipid transport and metabolism	Molecular Function: ATP binding (GO:0005524);; Biological Process: heme biosynthetic process (GO:0006783);; Cellular Component: chloroplast (GO:0009507);; Cellular Component: chromoplast (GO:0009509);; Biological Process: response to blue light (GO:0009637);; Biological Process: response to high light intensity (GO:0009644);; Biological Process: response to sucrose (GO:0009744);; Biological Proce…	K00919|0|sot:102601451|4-diphosphocytidyl-2-C-methyl-D-erythritol kinase, chloroplastic/chromoplastic-like; K00919 4-diphosphocytidyl-2-C-methyl-D-erythritol kinase [EC:2.7.1.148] (A)	ko00900:Terpenoid backbone biosynthesis	--	--	GHMP kinases N terminal domain	4-diphosphocytidyl-2-C-methyl-D-erythritol kinase, chloroplastic (Precursor) GN=ISPE OS=Mentha piperita (Peppermint) PE=1 SV=1	I	Lipid transport and metabolism	4-diphosphocytidyl-2-C-methyl-D-erythritol kinase [Salvia miltiorrhiza]
F02_cb11041_c37693/f2p1/1500	[I]	Lipid transport and metabolism	Molecular Function: ATP binding (GO:0005524);; Biological Process: heme biosynthetic process (GO:0006783);; Cellular Component: chloroplast (GO:0009507);; Cellular Component: chromoplast (GO:0009509);; Biological Process: response to blue light (GO:0009637);; Biological Process: response to high light intensity (GO:0009644);; Biological Process: response to sucrose (GO:0009744);; Biological Proce…	K00919|5.40583e-108|sot:102601451|4-diphosphocytidyl-2-C-methyl-D-erythritol kinase, chloroplastic/chromoplastic-like; K00919 4-diphosphocytidyl-2-C-methyl-D-erythritol kinase [EC:2.7.1.148] (A)	ko00900:Terpenoid backbone biosynthesis	--	--	GHMP kinases C terminal	4-diphosphocytidyl-2-C-methyl-D-erythritol kinase, chloroplastic (Precursor) GN=ISPE OS=Mentha piperita (Peppermint) PE=1 SV=1	I	Lipid transport and metabolism	type 1 4-diphosphocytidyl-2C-methyl-D-erythritol kinase [Ginkgo biloba]
F01_cb11122_c63/f6p0/1896	[H]	Coenzyme transport and metabolism	Molecular Function: transferase activity, transferring alkyl or aryl (other than methyl) groups (GO:0016765);;	K14066|9.02186e-137|sot:102588989|solanesyl diphosphate synthase 3, chloroplastic/mitochondrial-like; K14066 geranyl diphosphate synthase [EC:2.5.1.1] (A)	ko00900:Terpenoid backbone biosynthesis	[H]	Coenzyme transport and metabolism	Polyprenyl synthetase	Solanesyl diphosphate synthase 3, chloroplastic/mitochondrial (Precursor) GN=T31E10.3 OS=Arabidopsis thaliana (Mouse-ear cress) PE=1 SV=1	H	Coenzyme transport and metabolism	PREDICTED: solanesyl diphosphate synthase 3, chloroplastic/mitochondrial isoform X1 [Sesamum indicum]
F01_cb8278_c3/f1p0/2046	[I]	Lipid transport and metabolism	Molecular Function: transferase activity, transferring phosphorus-containing groups (GO:0016772);;	K15892|1.32159e-97|pvu:PHAVU_006G071000g|hypothetical protein; K15892 farnesol kinase [EC:2.7.1.-] (A)	ko00900:Terpenoid backbone biosynthesis	[S]	Function unknown	Cytidylyltransferase family	Probable phytol kinase 3, chloroplastic (Precursor) OS=Glycine max (Soybean) PE=2 SV=1	I	Lipid transport and metabolism	hypothetical protein MIMGU_mgv1a010789mg [Erythranthe guttata]
F01_cb16438_c4585/f1p0/2381	[I]	Lipid transport and metabolism	Biological Process: sulfur amino acid metabolic process (GO:0000096);; Biological Process: MAPK cascade (GO:0000165);; Molecular Function: iron ion binding (GO:0005506);; Biological Process: pentose-phosphate shunt (GO:0006098);; Biological Process: regulation of translation (GO:0006417);; Biological Process: glycine catabolic process (GO:0006546);; Biological Process: protein targeting to membra…	K03526|0|vvi:100257071|4-hydroxy-3-methylbut-2-en-1-yl diphosphate synthase, chloroplastic; K03526 (E)-4-hydroxy-3-methylbut-2-enyl-diphosphate synthase [EC:1.17.7.1 1.17.7.3] (A)	ko00900:Terpenoid backbone biosynthesis	--	--	GcpE protein;; GcpE protein	4-hydroxy-3-methylbut-2-en-1-yl diphosphate synthase, chloroplastic (Precursor) GN=MUP24.2 OS=Arabidopsis thaliana (Mouse-ear cress) PE=1 SV=1	I	Lipid transport and metabolism	(E)-4-hydroxy-3-methylbut-2-enyl diphosphate synthase [Salvia miltiorrhiza f. alba]
F01_cb9071_c5/f1p0/1740	[I]	Lipid transport and metabolism	Molecular Function: isopentenyl-diphosphate delta-isomerase activity (GO:0004452);; Biological Process: isoprenoid biosynthetic process (GO:0008299);; Cellular Component: chloroplast (GO:0009507);; Molecular Function: hydrolase activity (GO:0016787);;	K01823|6.08973e-154|sot:102580973|isopentenyl-diphosphate Delta-isomerase II-like; K01823 isopentenyl-diphosphate delta-isomerase [EC:5.3.3.2] (A)	ko00900:Terpenoid backbone biosynthesis	[Q]	Secondary metabolites biosynthesis, transport and catabolism	NUDIX domain	Isopentenyl-diphosphate Delta-isomerase II GN=IPI2 OS=Camptotheca acuminata (Happy tree) PE=2 SV=1	I	Lipid transport and metabolism	PREDICTED: isopentenyl-diphosphate Delta-isomerase I [Sesamum indicum]
F02_cb11212_c1/f1p0/1754	--	--	--	K11778|4.33717e-87|sot:102596985|nogo-B receptor-like; K11778 ditrans,polycis-polyprenyl diphosphate synthase [EC:2.5.1.87] (A)	ko00900:Terpenoid backbone biosynthesis	--	--	--	--	S	Function unknown	PREDICTED: dehydrodolichyl diphosphate syntase complex subunit nus1-like [Sesamum indicum]
F01_cb16438_c13677/f1p0/2323	[I]	Lipid transport and metabolism	Molecular Function: hydroxymethylglutaryl-CoA reductase (NADPH) activity (GO:0004420);; Cellular Component: endoplasmic reticulum membrane (GO:0005789);; Biological Process: isoprenoid biosynthetic process (GO:0008299);; Biological Process: coenzyme A metabolic process (GO:0015936);; Cellular Component: integral component of membrane (GO:0016021);; Molecular Function: NADP binding (GO:0050661);; …	K00021|0|sot:102577899|3-hydroxy-3-methylglutaryl coenzyme A reductase; K00021 hydroxymethylglutaryl-CoA reductase (NADPH) [EC:1.1.1.34] (A)	ko00900:Terpenoid backbone biosynthesis	[I]	Lipid transport and metabolism	Hydroxymethylglutaryl-coenzyme A reductase	3-hydroxy-3-methylglutaryl-coenzyme A reductase OS=Camptotheca acuminata (Happy tree) PE=3 SV=1	I	Lipid transport and metabolism	PREDICTED: 3-hydroxy-3-methylglutaryl-coenzyme A reductase [Sesamum indicum]
F01_cb16438_c55332/f4p1/2268	[IM]	--	Biological Process: isopentenyl diphosphate biosynthetic process, methylerythritol 4-phosphate pathway (GO:0019288);; Molecular Function: 4-hydroxy-3-methylbut-2-en-1-yl diphosphate reductase activity (GO:0051745);; Biological Process: oxidation-reduction process (GO:0055114);;	K03527|0|vvi:100267479|4-hydroxy-3-methylbut-2-enyl diphosphate reductase, chloroplastic; K03527 4-hydroxy-3-methylbut-2-enyl diphosphate reductase [EC:1.17.1.2] (A)	ko00900:Terpenoid backbone biosynthesis	--	--	LytB protein;; LytB protein	4-hydroxy-3-methylbut-2-enyl diphosphate reductase, chloroplastic (Precursor) GN=F10M10.120 OS=Arabidopsis thaliana (Mouse-ear cress) PE=2 SV=1	I	Lipid transport and metabolism	PREDICTED: 4-hydroxy-3-methylbut-2-enyl diphosphate reductase, chloroplastic [Sesamum indicum]
F01_cb14174_c3/f1p0/932	[I]	Lipid transport and metabolism	Cellular Component: mitochondrion (GO:0005739);; Molecular Function: 2-C-methyl-D-erythritol 2,4-cyclodiphosphate synthase activity (GO:0008685);; Cellular Component: chloroplast stroma (GO:0009570);; Biological Process: chlorophyll biosynthetic process (GO:0015995);; Biological Process: carotenoid biosynthetic process (GO:0016117);;	K01770|3.92099e-111|sly:101246365|2-C-methyl-D-erythritol 2,4-cyclodiphosphate synthase, chloroplastic; K01770 2-C-methyl-D-erythritol 2,4-cyclodiphosphate synthase [EC:4.6.1.12] (A)	ko00900:Terpenoid backbone biosynthesis	--	--	YgbB family	2-C-methyl-D-erythritol 2,4-cyclodiphosphate synthase, chloroplastic (Precursor) GN=ISPF OS=Catharanthus roseus (Madagascar periwinkle) PE=2 SV=1	I	Lipid transport and metabolism	2-C-methyl-D-erythritol 2,4-cyclodiphosphate synthase [Salvia miltiorrhiza]
F01_cb16232_c2/f1p0/1488	[I]	Lipid transport and metabolism	Molecular Function: transferase activity, transferring alkyl or aryl (other than methyl) groups (GO:0016765);;	K11778|2.07787e-128|vvi:100251570|dehydrodolichyl diphosphate synthase 6-like; K11778 ditrans,polycis-polyprenyl diphosphate synthase [EC:2.5.1.87] (A)	ko00900:Terpenoid backbone biosynthesis	[I]	Lipid transport and metabolism	Putative undecaprenyl diphosphate synthase	Dehydrodolichyl diphosphate synthase 6 GN=At2g17570 OS=Arabidopsis thaliana (Mouse-ear cress) PE=2 SV=2	I	Lipid transport and metabolism	PREDICTED: dehydrodolichyl diphosphate synthase 6-like [Sesamum indicum]
F01_cb13079_c9/f1p0/1380	[H]	Coenzyme transport and metabolism	Molecular Function: dimethylallyltranstransferase activity (GO:0004161);; Biological Process: phospholipid biosynthetic process (GO:0008654);; Cellular Component: plastid (GO:0009536);; Biological Process: terpenoid biosynthetic process (GO:0016114);;	K13789|9.72924e-153|mdm:103418313|geranylgeranyl pyrophosphate synthase, chloroplastic-like; K13789 geranylgeranyl diphosphate synthase, type II [EC:2.5.1.1 2.5.1.10 2.5.1.29] (A)	ko00900:Terpenoid backbone biosynthesis	[H]	Coenzyme transport and metabolism	Polyprenyl synthetase	Geranylgeranyl pyrophosphate synthase, chloroplastic (Precursor) GN=GGPS1 OS=Catharanthus roseus (Madagascar periwinkle) PE=3 SV=1	H	Coenzyme transport and metabolism	PREDICTED: geranylgeranyl pyrophosphate synthase, chloroplastic-like [Sesamum indicum]
F01_cb8041_c6/f2p0/2061	[I]	Lipid transport and metabolism	Biological Process: maltose metabolic process (GO:0000023);; Biological Process: sulfur amino acid metabolic process (GO:0000096);; Biological Process: pentose-phosphate shunt (GO:0006098);; Biological Process: glycine catabolic process (GO:0006546);; Biological Process: unsaturated fatty acid biosynthetic process (GO:0006636);; Biological Process: phosphatidylglycerol biosynthetic process (GO:00…	K00099|0|sly:543682|DXR; 1-deoxy-D-xylulose-5-phosphate reductoisomerase; K00099 1-deoxy-D-xylulose-5-phosphate reductoisomerase [EC:1.1.1.267] (A)	ko00900:Terpenoid backbone biosynthesis	--	--	1-deoxy-D-xylulose 5-phosphate reductoisomerase;; DXP reductoisomerase C-terminal domain;; 1-deoxy-D-xylulose 5-phosphate reductoisomerase C-terminal	1-deoxy-D-xylulose 5-phosphate reductoisomerase, chloroplastic (Precursor) GN=DXR OS=Mentha piperita (Peppermint) PE=2 SV=2	I	Lipid transport and metabolism	PREDICTED: 1-deoxy-D-xylulose 5-phosphate reductoisomerase, chloroplastic [Sesamum indicum]
F02_cb3805_c5/f1p0/2627	[O]	Posttranslational modification, protein turnover, chaperones	Molecular Function: prenyltransferase activity (GO:0004659);; Biological Process: cellular process (GO:0009987);;	K05954|4.38382e-76|pvu:PHAVU_004G014500g|hypothetical protein; K05954 protein farnesyltransferase subunit beta [EC:2.5.1.58] (A)	ko00900:Terpenoid backbone biosynthesis	[O]	Posttranslational modification, protein turnover, chaperones	Prenyltransferase and squalene oxidase repeat;; Prenyltransferase and squalene oxidase repeat;; Prenyltransferase-like	Protein farnesyltransferase subunit beta GN=FTB OS=Pisum sativum (Garden pea) PE=1 SV=1	O	Posttranslational modification, protein turnover, chaperones	PREDICTED: protein farnesyltransferase subunit beta [Sesamum indicum]
F01_cb9742_c3/f1p0/2102	[H]	Coenzyme transport and metabolism	Molecular Function: trans-hexaprenyltranstransferase activity (GO:0000010);; Biological Process: isoprenoid biosynthetic process (GO:0008299);;	K14066|6.1037e-111|gmx:100780374|solanesyl diphosphate synthase 3, chloroplastic/mitochondrial-like; K14066 geranyl diphosphate synthase [EC:2.5.1.1] (A)	ko00900:Terpenoid backbone biosynthesis	[H]	Coenzyme transport and metabolism	Polyprenyl synthetase;; Polyprenyl synthetase	Solanesyl-diphosphate synthase 1, mitochondrial (Precursor) GN=SPS1 OS=Oryza sativa subsp. japonica (Rice) PE=1 SV=1	H	Coenzyme transport and metabolism	PREDICTED: solanesyl diphosphate synthase 3, chloroplastic/mitochondrial-like isoform X3 [Glycine max]
F01_cb11122_c17/f1p0/1811	[H]	Coenzyme transport and metabolism	Molecular Function: dimethylallyltranstransferase activity (GO:0004161);; Biological Process: ubiquinone biosynthetic process (GO:0006744);; Biological Process: isoprenoid biosynthetic process (GO:0008299);; Cellular Component: chloroplast (GO:0009507);; Biological Process: embryo development (GO:0009790);; Molecular Function: trans-octaprenyltranstransferase activity (GO:0050347);;	K14066|0|sot:102588989|solanesyl diphosphate synthase 3, chloroplastic/mitochondrial-like; K14066 geranyl diphosphate synthase [EC:2.5.1.1] (A)	ko00900:Terpenoid backbone biosynthesis	[H]	Coenzyme transport and metabolism	Polyprenyl synthetase	Solanesyl diphosphate synthase 3, chloroplastic/mitochondrial (Precursor) GN=T31E10.3 OS=Arabidopsis thaliana (Mouse-ear cress) PE=1 SV=1	H	Coenzyme transport and metabolism	PREDICTED: solanesyl diphosphate synthase 3, chloroplastic/mitochondrial isoform X1 [Sesamum indicum]
F02_cb12161_c1/f2p0/1657	[I]	Lipid transport and metabolism	Molecular Function: transferase activity, transferring alkyl or aryl (other than methyl) groups (GO:0016765);;	K11778|3.40159e-123|pmum:103334495|dehydrodolichyl diphosphate synthase 6-like; K11778 ditrans,polycis-polyprenyl diphosphate synthase [EC:2.5.1.87] (A)	ko00900:Terpenoid backbone biosynthesis	[I]	Lipid transport and metabolism	Putative undecaprenyl diphosphate synthase	Dehydrodolichyl diphosphate synthase 6 GN=At2g17570 OS=Arabidopsis thaliana (Mouse-ear cress) PE=2 SV=2	I	Lipid transport and metabolism	PREDICTED: dehydrodolichyl diphosphate synthase 6 [Sesamum indicum]
F01_cb9137_c4/f1p0/2541	--	--	--	K08658|4.42247e-36|vvi:100247667|CAAX prenyl protease 2; K08658 prenyl protein peptidase [EC:3.4.22.-] (A)	ko00900:Terpenoid backbone biosynthesis	[O]	Posttranslational modification, protein turnover, chaperones	--	CAAX prenyl protease 2 GN=F2H17 OS=Arabidopsis thaliana (Mouse-ear cress) PE=2 SV=2	O	Posttranslational modification, protein turnover, chaperones	PREDICTED: CAAX prenyl protease 2 [Sesamum indicum]
F01_cb16438_c46024/f1p0/2086	[IM]	--	Cellular Component: chloroplast stroma (GO:0009570);; Biological Process: isopentenyl diphosphate biosynthetic process, methylerythritol 4-phosphate pathway (GO:0019288);; Molecular Function: 4-hydroxy-3-methylbut-2-en-1-yl diphosphate synthase activity (GO:0046429);; Molecular Function: 4-hydroxy-3-methylbut-2-en-1-yl diphosphate reductase activity (GO:0051745);; Biological Process: oxidation-re…	K03527|2.47437e-86|vvi:100267479|4-hydroxy-3-methylbut-2-enyl diphosphate reductase, chloroplastic; K03527 4-hydroxy-3-methylbut-2-enyl diphosphate reductase [EC:1.17.1.2] (A)	ko00900:Terpenoid backbone biosynthesis	--	--	LytB protein;; LytB protein	4-hydroxy-3-methylbut-2-enyl diphosphate reductase, chloroplastic (Precursor) GN=OSJNBa0079G12.18 OS=Oryza sativa subsp. japonica (Rice) PE=2 SV=1	I	Lipid transport and metabolism	PREDICTED: 4-hydroxy-3-methylbut-2-enyl diphosphate reductase, chloroplastic [Sesamum indicum]
F01_cb16438_c12553/f1p0/2411	[I]	Lipid transport and metabolism	Molecular Function: hydroxymethylglutaryl-CoA reductase (NADPH) activity (GO:0004420);; Cellular Component: endoplasmic reticulum membrane (GO:0005789);; Biological Process: isoprenoid biosynthetic process (GO:0008299);; Biological Process: coenzyme A metabolic process (GO:0015936);; Cellular Component: integral component of membrane (GO:0016021);; Molecular Function: NADP binding (GO:0050661);; …	K00021|0|sot:102577899|3-hydroxy-3-methylglutaryl coenzyme A reductase; K00021 hydroxymethylglutaryl-CoA reductase (NADPH) [EC:1.1.1.34] (A)	ko00900:Terpenoid backbone biosynthesis	[I]	Lipid transport and metabolism	Hydroxymethylglutaryl-coenzyme A reductase	3-hydroxy-3-methylglutaryl-coenzyme A reductase OS=Camptotheca acuminata (Happy tree) PE=3 SV=1	I	Lipid transport and metabolism	hypothetical protein MIMGU_mgv1a003590mg [Erythranthe guttata]
F02_cb7697_c2/f6p0/1568	[IM]	--	Biological Process: isopentenyl diphosphate biosynthetic process, methylerythritol 4-phosphate pathway (GO:0019288);; Biological Process: oxidation-reduction process (GO:0055114);;	K03527|0|vvi:100267479|4-hydroxy-3-methylbut-2-enyl diphosphate reductase, chloroplastic; K03527 4-hydroxy-3-methylbut-2-enyl diphosphate reductase [EC:1.17.1.2] (A)	ko00900:Terpenoid backbone biosynthesis	--	--	LytB protein	4-hydroxy-3-methylbut-2-enyl diphosphate reductase, chloroplastic (Precursor) GN=F10M10.120 OS=Arabidopsis thaliana (Mouse-ear cress) PE=2 SV=1	I	Lipid transport and metabolism	PREDICTED: 4-hydroxy-3-methylbut-2-enyl diphosphate reductase, chloroplastic [Sesamum indicum]
F02_cb7697_c32/f5p1/2231	[IM]	--	Biological Process: isopentenyl diphosphate biosynthetic process, methylerythritol 4-phosphate pathway (GO:0019288);; Biological Process: oxidation-reduction process (GO:0055114);;	K03527|1.93906e-141|tcc:TCM_007277|4-hydroxy-3-methylbut-2-enyl diphosphate reductase isoform 1; K03527 4-hydroxy-3-methylbut-2-enyl diphosphate reductase [EC:1.17.1.2] (A)	ko00900:Terpenoid backbone biosynthesis	--	--	LytB protein;; LytB protein;; LytB protein	4-hydroxy-3-methylbut-2-enyl diphosphate reductase, chloroplastic (Precursor) GN=OSJNBa0079G12.18 OS=Oryza sativa subsp. japonica (Rice) PE=2 SV=1	I	Lipid transport and metabolism	PREDICTED: 4-hydroxy-3-methylbut-2-enyl diphosphate reductase, chloroplastic [Sesamum indicum]
F01_cb9135_c1/f1p0/2328	[I]	Lipid transport and metabolism	Biological Process: isoprenoid biosynthetic process (GO:0008299);; Molecular Function: 2-C-methyl-D-erythritol 4-phosphate cytidylyltransferase activity (GO:0050518);;	K00991|1.01935e-105|sot:102588399|2-C-methyl-D-erythritol 4-phosphate cytidylyltransferase, chloroplastic-like; K00991 2-C-methyl-D-erythritol 4-phosphate cytidylyltransferase [EC:2.7.7.60] (A)	ko00900:Terpenoid backbone biosynthesis	--	--	2-C-methyl-D-erythritol 4-phosphate cytidylyltransferase	2-C-methyl-D-erythritol 4-phosphate cytidylyltransferase, chloroplastic (Precursor) GN=T8K22.20 OS=Arabidopsis thaliana (Mouse-ear cress) PE=1 SV=1	I	Lipid transport and metabolism	putative 2-C-methyl-D-erythritol 2,4-cyclodiphosphate synthase, partial [Olea europaea]
F01_cb9135_c5/f1p0/1153	[I]	Lipid transport and metabolism	Biological Process: isoprenoid biosynthetic process (GO:0008299);; Molecular Function: 2-C-methyl-D-erythritol 4-phosphate cytidylyltransferase activity (GO:0050518);;	K00991|7.54234e-110|sot:102588399|2-C-methyl-D-erythritol 4-phosphate cytidylyltransferase, chloroplastic-like; K00991 2-C-methyl-D-erythritol 4-phosphate cytidylyltransferase [EC:2.7.7.60] (A)	ko00900:Terpenoid backbone biosynthesis	--	--	2-C-methyl-D-erythritol 4-phosphate cytidylyltransferase;; 2-C-methyl-D-erythritol 4-phosphate cytidylyltransferase	2-C-methyl-D-erythritol 4-phosphate cytidylyltransferase, chloroplastic (Precursor) GN=T8K22.20 OS=Arabidopsis thaliana (Mouse-ear cress) PE=1 SV=1	I	Lipid transport and metabolism	hypothetical protein MIMGU_mgv1a010477mg [Erythranthe guttata]
F01_cb12158_c4/f1p0/1513	[H]	Coenzyme transport and metabolism	Molecular Function: dimethylallyltranstransferase activity (GO:0004161);; Molecular Function: farnesyltranstransferase activity (GO:0004311);; Molecular Function: geranyltranstransferase activity (GO:0004337);; Cellular Component: chloroplast (GO:0009507);; Biological Process: carotenoid biosynthetic process (GO:0016117);; Molecular Function: 2-alkenal reductase [NAD(P)] activity (GO:0032440);; B…	K13789|0|mdm:103418313|geranylgeranyl pyrophosphate synthase, chloroplastic-like; K13789 geranylgeranyl diphosphate synthase, type II [EC:2.5.1.1 2.5.1.10 2.5.1.29] (A)	ko00900:Terpenoid backbone biosynthesis	[H]	Coenzyme transport and metabolism	Polyprenyl synthetase	Geranylgeranyl pyrophosphate synthase, chloroplastic (Precursor) GN=GGPS OS=Hevea brasiliensis (Para rubber tree) PE=1 SV=1	H	Coenzyme transport and metabolism	Geranylgeranyl pyrophosphate synthase [Morus notabilis]
F01_cb16438_c4577/f1p0/2943	[I]	Lipid transport and metabolism	Biological Process: sulfur amino acid metabolic process (GO:0000096);; Biological Process: MAPK cascade (GO:0000165);; Molecular Function: iron ion binding (GO:0005506);; Biological Process: pentose-phosphate shunt (GO:0006098);; Biological Process: regulation of translation (GO:0006417);; Biological Process: glycine catabolic process (GO:0006546);; Biological Process: protein targeting to membra…	K03526|0|mdm:103413028|4-hydroxy-3-methylbut-2-en-1-yl diphosphate synthase, chloroplastic; K03526 (E)-4-hydroxy-3-methylbut-2-enyl-diphosphate synthase [EC:1.17.7.1 1.17.7.3] (A)	ko00900:Terpenoid backbone biosynthesis	--	--	GcpE protein	4-hydroxy-3-methylbut-2-en-1-yl diphosphate synthase, chloroplastic (Precursor) GN=MUP24.2 OS=Arabidopsis thaliana (Mouse-ear cress) PE=1 SV=1	I	Lipid transport and metabolism	(E)-4-hydroxy-3-methylbut-2-enyl diphosphate synthase [Salvia miltiorrhiza f. alba]
F01_cb11562_c0/f2p0/1760	[I]	Lipid transport and metabolism	Biological Process: maltose metabolic process (GO:0000023);; Biological Process: sulfur amino acid metabolic process (GO:0000096);; Biological Process: pentose-phosphate shunt (GO:0006098);; Biological Process: glycine catabolic process (GO:0006546);; Biological Process: unsaturated fatty acid biosynthetic process (GO:0006636);; Biological Process: phosphatidylglycerol biosynthetic process (GO:00…	K00099|0|vvi:100248516|1-deoxy-D-xylulose 5-phosphate reductoisomerase, chloroplastic; K00099 1-deoxy-D-xylulose-5-phosphate reductoisomerase [EC:1.1.1.267] (A)	ko00900:Terpenoid backbone biosynthesis	--	--	1-deoxy-D-xylulose 5-phosphate reductoisomerase;; 1-deoxy-D-xylulose 5-phosphate reductoisomerase C-terminal;; DXP reductoisomerase C-terminal domain	1-deoxy-D-xylulose 5-phosphate reductoisomerase, chloroplastic (Precursor) GN=MQB2.11 OS=Arabidopsis thaliana (Mouse-ear cress) PE=2 SV=2	I	Lipid transport and metabolism	1-deoxy-D-xylulose 5-phosphate reductoisomerase [Morus notabilis]
F01_cb4189_c15/f1p0/1458	[H]	Coenzyme transport and metabolism	Molecular Function: dimethylallyltranstransferase activity (GO:0004161);; Molecular Function: geranyltranstransferase activity (GO:0004337);; Biological Process: isoprenoid biosynthetic process (GO:0008299);;	K00787|0|cmo:103501295|farnesyl pyrophosphate synthase 1; K00787 farnesyl diphosphate synthase [EC:2.5.1.1 2.5.1.10] (A)	ko00900:Terpenoid backbone biosynthesis	[H]	Coenzyme transport and metabolism	Polyprenyl synthetase;; Polyprenyl synthetase	Farnesyl pyrophosphate synthase 1 GN=FPS1 OS=Lupinus albus (White lupin) PE=2 SV=1	H	Coenzyme transport and metabolism	farnesyl diphosphate synthetase [Salvia miltiorrhiza]
F02_cb9159_c4/f1p0/2200	[I]	Lipid transport and metabolism	Molecular Function: hydroxymethylglutaryl-CoA reductase (NADPH) activity (GO:0004420);; Biological Process: isoprenoid biosynthetic process (GO:0008299);; Biological Process: coenzyme A metabolic process (GO:0015936);; Cellular Component: integral component of membrane (GO:0016021);; Molecular Function: NADP binding (GO:0050661);; Biological Process: oxidation-reduction process (GO:0055114);;	K00021|0|sot:102585007|3-hydroxy-3-methylglutaryl-coenzyme A reductase 1-like; K00021 hydroxymethylglutaryl-CoA reductase (NADPH) [EC:1.1.1.34] (A)	ko00900:Terpenoid backbone biosynthesis	[I]	Lipid transport and metabolism	Hydroxymethylglutaryl-coenzyme A reductase;; Hydroxymethylglutaryl-coenzyme A reductase	3-hydroxy-3-methylglutaryl-coenzyme A reductase 1 GN=HMGR1 OS=Hevea brasiliensis (Para rubber tree) PE=2 SV=1	I	Lipid transport and metabolism	3-hydroxy-3-methylglutaryl-coenzyme A reductase [Salvia miltiorrhiza]
F02_cb10218_c2/f1p0/1975	[H]	Coenzyme transport and metabolism	Molecular Function: dimethylallyltranstransferase activity (GO:0004161);; Biological Process: ubiquinone biosynthetic process (GO:0006744);; Biological Process: isoprenoid biosynthetic process (GO:0008299);; Cellular Component: chloroplast (GO:0009507);; Biological Process: embryo development (GO:0009790);; Molecular Function: trans-octaprenyltranstransferase activity (GO:0050347);;	K14066|0|sot:102588989|solanesyl diphosphate synthase 3, chloroplastic/mitochondrial-like; K14066 geranyl diphosphate synthase [EC:2.5.1.1] (A)	ko00900:Terpenoid backbone biosynthesis	[H]	Coenzyme transport and metabolism	Polyprenyl synthetase	Solanesyl diphosphate synthase 3, chloroplastic/mitochondrial (Precursor) GN=T31E10.3 OS=Arabidopsis thaliana (Mouse-ear cress) PE=1 SV=1	H	Coenzyme transport and metabolism	PREDICTED: solanesyl diphosphate synthase 3, chloroplastic/mitochondrial isoform X1 [Sesamum indicum]
F02_cb11041_c41290/f1p0/2613	[I]	Lipid transport and metabolism	Molecular Function: hydroxymethylglutaryl-CoA reductase (NADPH) activity (GO:0004420);; Cellular Component: endoplasmic reticulum membrane (GO:0005789);; Biological Process: isoprenoid biosynthetic process (GO:0008299);; Biological Process: coenzyme A metabolic process (GO:0015936);; Cellular Component: integral component of membrane (GO:0016021);; Molecular Function: NADP binding (GO:0050661);; …	K00021|0|sot:102577899|3-hydroxy-3-methylglutaryl coenzyme A reductase; K00021 hydroxymethylglutaryl-CoA reductase (NADPH) [EC:1.1.1.34] (A)	ko00900:Terpenoid backbone biosynthesis	[I]	Lipid transport and metabolism	Hydroxymethylglutaryl-coenzyme A reductase	3-hydroxy-3-methylglutaryl-coenzyme A reductase OS=Camptotheca acuminata (Happy tree) PE=3 SV=1	I	Lipid transport and metabolism	PREDICTED: 3-hydroxy-3-methylglutaryl-coenzyme A reductase [Sesamum indicum]
F02_cb9372_c3/f1p0/2235	[H]	Coenzyme transport and metabolism	Molecular Function: trans-hexaprenyltranstransferase activity (GO:0000010);; Biological Process: isoprenoid biosynthetic process (GO:0008299);; Biological Process: photosynthesis (GO:0015979);;	K05356|0|rcu:RCOM_1182760|solanesyl diphosphate synthase, putative (EC:2.5.1.30); K05356 all-trans-nonaprenyl-diphosphate synthase [EC:2.5.1.84 2.5.1.85] (A)	ko00900:Terpenoid backbone biosynthesis	[H]	Coenzyme transport and metabolism	Polyprenyl synthetase	Solanesyl diphosphate synthase 1 GN=T30F21.15 OS=Arabidopsis thaliana (Mouse-ear cress) PE=1 SV=1	H	Coenzyme transport and metabolism	PREDICTED: probable solanesyl-diphosphate synthase 3, chloroplastic isoform X1 [Sesamum indicum]
F01_cb4189_c11/f1p0/1555	[H]	Coenzyme transport and metabolism	Molecular Function: dimethylallyltranstransferase activity (GO:0004161);; Molecular Function: geranyltranstransferase activity (GO:0004337);; Biological Process: isoprenoid biosynthetic process (GO:0008299);;	K00787|0|cmo:103501295|farnesyl pyrophosphate synthase 1; K00787 farnesyl diphosphate synthase [EC:2.5.1.1 2.5.1.10] (A)	ko00900:Terpenoid backbone biosynthesis	[H]	Coenzyme transport and metabolism	Polyprenyl synthetase	Farnesyl pyrophosphate synthase 1 GN=FPS1 OS=Lupinus albus (White lupin) PE=2 SV=1	H	Coenzyme transport and metabolism	farnesyl diphosphate synthetase [Salvia miltiorrhiza]
F02_cb7697_c12/f1p0/2245	[IM]	--	Biological Process: isopentenyl diphosphate biosynthetic process, methylerythritol 4-phosphate pathway (GO:0019288);; Biological Process: oxidation-reduction process (GO:0055114);;	K03527|1.39049e-131|mus:103978799|4-hydroxy-3-methylbut-2-enyl diphosphate reductase, chloroplastic-like; K03527 4-hydroxy-3-methylbut-2-enyl diphosphate reductase [EC:1.17.1.2] (A)	ko00900:Terpenoid backbone biosynthesis	--	--	LytB protein;; LytB protein;; LytB protein	4-hydroxy-3-methylbut-2-enyl diphosphate reductase, chloroplastic (Precursor) GN=F10M10.120 OS=Arabidopsis thaliana (Mouse-ear cress) PE=2 SV=1	I	Lipid transport and metabolism	PREDICTED: 4-hydroxy-3-methylbut-2-enyl diphosphate reductase, chloroplastic-like [Musa acuminata subsp. malaccensis]
F01_cb13703_c4/f2p0/1113	--	--	--	K11778|7.39331e-90|sot:102596985|nogo-B receptor-like; K11778 ditrans,polycis-polyprenyl diphosphate synthase [EC:2.5.1.87] (A)	ko00900:Terpenoid backbone biosynthesis	--	--	--	--	S	Function unknown	PREDICTED: dehydrodolichyl diphosphate syntase complex subunit nus1-like [Sesamum indicum]
F02_cb9580_c1/f1p2/2009	--	--	Molecular Function: prenylcysteine oxidase activity (GO:0001735);; Cellular Component: vacuolar membrane (GO:0005774);; Biological Process: abscisic acid-activated signaling pathway (GO:0009738);; Biological Process: prenylated protein catabolic process (GO:0030327);; Biological Process: prenylcysteine catabolic process (GO:0030328);; Biological Process: hydrogen peroxide catabolic process (GO:00…	K05906|0|cit:102619140|farnesylcysteine lyase-like; K05906 prenylcysteine oxidase / farnesylcysteine lyase [EC:1.8.3.5 1.8.3.6] (A)	ko00900:Terpenoid backbone biosynthesis	--	--	Prenylcysteine lyase	Farnesylcysteine lyase (Precursor) GN=FLCY OS=Arabidopsis thaliana (Mouse-ear cress) PE=1 SV=1	O	Posttranslational modification, protein turnover, chaperones	PREDICTED: farnesylcysteine lyase [Sesamum indicum]
F02_cb11041_c41047/f1p1/2171	[I]	Lipid transport and metabolism	Molecular Function: hydroxymethylglutaryl-CoA reductase (NADPH) activity (GO:0004420);; Cellular Component: endoplasmic reticulum (GO:0005783);; Biological Process: isoprenoid biosynthetic process (GO:0008299);; Biological Process: coenzyme A metabolic process (GO:0015936);; Cellular Component: integral component of membrane (GO:0016021);; Biological Process: sterol biosynthetic process (GO:00161…	K00021|0|rcu:RCOM_1602200|hmg-CoA reductase, putative (EC:1.1.1.34); K00021 hydroxymethylglutaryl-CoA reductase (NADPH) [EC:1.1.1.34] (A)	ko00900:Terpenoid backbone biosynthesis	[I]	Lipid transport and metabolism	Hydroxymethylglutaryl-coenzyme A reductase	3-hydroxy-3-methylglutaryl-coenzyme A reductase GN=HMGR OS=Nicotiana sylvestris (Wood tobacco) PE=2 SV=1	I	Lipid transport and metabolism	HMG CoA reductase [Bacopa monnieri]
F02_cb11041_c4929/f1p2/2573	[I]	Lipid transport and metabolism	Molecular Function: iron ion binding (GO:0005506);; Biological Process: terpenoid biosynthetic process (GO:0016114);; Molecular Function: 4-hydroxy-3-methylbut-2-en-1-yl diphosphate synthase activity (GO:0046429);; Biological Process: oxidation-reduction process (GO:0055114);;	K03526|0|mdm:103422909|4-hydroxy-3-methylbut-2-en-1-yl diphosphate synthase, chloroplastic; K03526 (E)-4-hydroxy-3-methylbut-2-enyl-diphosphate synthase [EC:1.17.7.1 1.17.7.3] (A)	ko00900:Terpenoid backbone biosynthesis	--	--	GcpE protein;; GcpE protein	4-hydroxy-3-methylbut-2-en-1-yl diphosphate synthase, chloroplastic (Precursor) GN=MUP24.2 OS=Arabidopsis thaliana (Mouse-ear cress) PE=1 SV=1	I	Lipid transport and metabolism	(E)-4-hydroxy-3-methylbut-2-enyl diphosphate synthase [Salvia miltiorrhiza f. alba]
F01_cb12383_c3/f1p0/2411	[O]	Posttranslational modification, protein turnover, chaperones	Molecular Function: prenyltransferase activity (GO:0004659);; Biological Process: protein prenylation (GO:0018342);; Biological Process: single-organism process (GO:0044699);; Biological Process: regulation of cellular process (GO:0050794);; Biological Process: response to oxygen-containing compound (GO:1901700);;	K05954|9.97901e-81|pvu:PHAVU_004G014500g|hypothetical protein; K05954 protein farnesyltransferase subunit beta [EC:2.5.1.58] (A)	ko00900:Terpenoid backbone biosynthesis	[O]	Posttranslational modification, protein turnover, chaperones	Prenyltransferase and squalene oxidase repeat;; Prenyltransferase and squalene oxidase repeat;; Prenyltransferase-like	Protein farnesyltransferase subunit beta GN=FTB OS=Pisum sativum (Garden pea) PE=1 SV=1	O	Posttranslational modification, protein turnover, chaperones	PREDICTED: protein farnesyltransferase subunit beta [Sesamum indicum]
F01_cb9579_c2/f2p0/2032	--	--	Cellular Component: vacuole (GO:0005773);; Cellular Component: membrane (GO:0016020);; Molecular Function: oxidoreductase activity, acting on a sulfur group of donors, oxygen as acceptor (GO:0016670);; Biological Process: primary metabolic process (GO:0044238);; Biological Process: cellular catabolic process (GO:0044248);; Biological Process: single-organism metabolic process (GO:0044710);; Biolo…	K05906|1.5651e-149|pper:PRUPE_ppa004820mg|hypothetical protein; K05906 prenylcysteine oxidase / farnesylcysteine lyase [EC:1.8.3.5 1.8.3.6] (A)	ko00900:Terpenoid backbone biosynthesis	--	--	Prenylcysteine lyase;; NAD(P)-binding Rossmann-like domain;; Flavin containing amine oxidoreductase;; Prenylcysteine lyase	Farnesylcysteine lyase (Precursor) GN=FLCY OS=Arabidopsis thaliana (Mouse-ear cress) PE=1 SV=1	O	Posttranslational modification, protein turnover, chaperones	hypothetical protein PRUPE_ppa004820mg [Prunus persica]
F02_cb11607_c4/f1p0/1756	[I]	Lipid transport and metabolism	Molecular Function: isopentenyl-diphosphate delta-isomerase activity (GO:0004452);; Biological Process: isoprenoid biosynthetic process (GO:0008299);; Cellular Component: chloroplast (GO:0009507);; Molecular Function: hydrolase activity (GO:0016787);;	K01823|1.35535e-108|sot:102580973|isopentenyl-diphosphate Delta-isomerase II-like; K01823 isopentenyl-diphosphate delta-isomerase [EC:5.3.3.2] (A)	ko00900:Terpenoid backbone biosynthesis	[Q]	Secondary metabolites biosynthesis, transport and catabolism	NUDIX domain	Isopentenyl-diphosphate Delta-isomerase I GN=IPI1 OS=Camptotheca acuminata (Happy tree) PE=2 SV=1	I	Lipid transport and metabolism	PREDICTED: isopentenyl-diphosphate Delta-isomerase I [Sesamum indicum]
F01_cb16438_c55603/f2p0/2212	[I]	Lipid transport and metabolism	Molecular Function: hydroxymethylglutaryl-CoA reductase (NADPH) activity (GO:0004420);; Cellular Component: endoplasmic reticulum membrane (GO:0005789);; Biological Process: isoprenoid biosynthetic process (GO:0008299);; Biological Process: coenzyme A metabolic process (GO:0015936);; Cellular Component: integral component of membrane (GO:0016021);; Molecular Function: NADP binding (GO:0050661);; …	K00021|0|sot:102577899|3-hydroxy-3-methylglutaryl coenzyme A reductase; K00021 hydroxymethylglutaryl-CoA reductase (NADPH) [EC:1.1.1.34] (A)	ko00900:Terpenoid backbone biosynthesis	[I]	Lipid transport and metabolism	Hydroxymethylglutaryl-coenzyme A reductase;; Hydroxymethylglutaryl-coenzyme A reductase	3-hydroxy-3-methylglutaryl-coenzyme A reductase OS=Camptotheca acuminata (Happy tree) PE=3 SV=1	I	Lipid transport and metabolism	hypothetical protein MIMGU_mgv1a003590mg [Erythranthe guttata]
F02_cb9580_c0/f1p0/2064	--	--	Molecular Function: prenylcysteine oxidase activity (GO:0001735);; Cellular Component: vacuolar membrane (GO:0005774);; Biological Process: abscisic acid-activated signaling pathway (GO:0009738);; Biological Process: prenylated protein catabolic process (GO:0030327);; Biological Process: prenylcysteine catabolic process (GO:0030328);; Biological Process: hydrogen peroxide catabolic process (GO:00…	K05906|2.4399e-163|cit:102619140|farnesylcysteine lyase-like; K05906 prenylcysteine oxidase / farnesylcysteine lyase [EC:1.8.3.5 1.8.3.6] (A)	ko00900:Terpenoid backbone biosynthesis	--	--	Prenylcysteine lyase;; NAD(P)-binding Rossmann-like domain;; Flavin containing amine oxidoreductase;; Prenylcysteine lyase	Farnesylcysteine lyase (Precursor) GN=FLCY OS=Arabidopsis thaliana (Mouse-ear cress) PE=1 SV=1	O	Posttranslational modification, protein turnover, chaperones	PREDICTED: farnesylcysteine lyase [Sesamum indicum]
F02_cb8431_c0/f1p0/2225	[I]	Lipid transport and metabolism	Molecular Function: hydroxymethylglutaryl-CoA reductase (NADPH) activity (GO:0004420);; Cellular Component: endoplasmic reticulum membrane (GO:0005789);; Biological Process: isoprenoid biosynthetic process (GO:0008299);; Biological Process: coenzyme A metabolic process (GO:0015936);; Cellular Component: integral component of membrane (GO:0016021);; Cellular Component: mitochondrial membrane (GO:0…	K00021|0|rcu:RCOM_1602200|hmg-CoA reductase, putative (EC:1.1.1.34); K00021 hydroxymethylglutaryl-CoA reductase (NADPH) [EC:1.1.1.34] (A)	ko00900:Terpenoid backbone biosynthesis	[I]	Lipid transport and metabolism	Hydroxymethylglutaryl-coenzyme A reductase	3-hydroxy-3-methylglutaryl-coenzyme A reductase 1 GN=HMGR1 OS=Hevea brasiliensis (Para rubber tree) PE=2 SV=1	I	Lipid transport and metabolism	PREDICTED: 3-hydroxy-3-methylglutaryl-coenzyme A reductase 1-like [Beta vulgaris subsp. vulgaris]
F01_cb16438_c18400/f1p0/2312	[I]	Lipid transport and metabolism	Molecular Function: hydroxymethylglutaryl-CoA reductase (NADPH) activity (GO:0004420);; Cellular Component: endoplasmic reticulum membrane (GO:0005789);; Biological Process: isoprenoid biosynthetic process (GO:0008299);; Biological Process: coenzyme A metabolic process (GO:0015936);; Cellular Component: integral component of membrane (GO:0016021);; Molecular Function: NADP binding (GO:0050661);; …	K00021|0|sot:102577899|3-hydroxy-3-methylglutaryl coenzyme A reductase; K00021 hydroxymethylglutaryl-CoA reductase (NADPH) [EC:1.1.1.34] (A)	ko00900:Terpenoid backbone biosynthesis	[I]	Lipid transport and metabolism	Hydroxymethylglutaryl-coenzyme A reductase	3-hydroxy-3-methylglutaryl-coenzyme A reductase OS=Camptotheca acuminata (Happy tree) PE=3 SV=1	I	Lipid transport and metabolism	hypothetical protein MIMGU_mgv1a003590mg [Erythranthe guttata]
F01_cb8147_c1/f1p0/2447	[H]	Coenzyme transport and metabolism	Molecular Function: dimethylallyltranstransferase activity (GO:0004161);; Biological Process: isoprenoid biosynthetic process (GO:0008299);; Molecular Function: 2-alkenal reductase [NAD(P)] activity (GO:0032440);; Biological Process: oxidation-reduction process (GO:0055114);;	K13789|4.50001e-150|sly:778310|GGPS1; geranylgeranyl pyrophosphate synthase 1; K13789 geranylgeranyl diphosphate synthase, type II [EC:2.5.1.1 2.5.1.10 2.5.1.29] (A)	ko00900:Terpenoid backbone biosynthesis	[H]	Coenzyme transport and metabolism	Glutathione S-transferase, N-terminal domain;; Glutathione S-transferase, N-terminal domain;; Glutathione S-transferase, C-terminal domain;; Glutathione S-transferase, N-terminal domain	Geranylgeranyl pyrophosphate synthase, chloroplastic (Precursor) GN=GGPS OS=Hevea brasiliensis (Para rubber tree) PE=1 SV=1	H	Coenzyme transport and metabolism	hypothetical protein MIMGU_mgv1a018377mg [Erythranthe guttata]
F01_cb11122_c9/f4p1/1809	[H]	Coenzyme transport and metabolism	Molecular Function: dimethylallyltranstransferase activity (GO:0004161);; Biological Process: ubiquinone biosynthetic process (GO:0006744);; Biological Process: isoprenoid biosynthetic process (GO:0008299);; Cellular Component: chloroplast (GO:0009507);; Biological Process: embryo development (GO:0009790);; Molecular Function: trans-octaprenyltranstransferase activity (GO:0050347);;	K14066|0|sot:102588989|solanesyl diphosphate synthase 3, chloroplastic/mitochondrial-like; K14066 geranyl diphosphate synthase [EC:2.5.1.1] (A)	ko00900:Terpenoid backbone biosynthesis	[H]	Coenzyme transport and metabolism	Polyprenyl synthetase	Solanesyl diphosphate synthase 3, chloroplastic/mitochondrial (Precursor) GN=T31E10.3 OS=Arabidopsis thaliana (Mouse-ear cress) PE=1 SV=1	H	Coenzyme transport and metabolism	PREDICTED: solanesyl diphosphate synthase 3, chloroplastic/mitochondrial isoform X1 [Sesamum indicum]
F02_cb7697_c8/f1p1/1637	[IM]	--	Cellular Component: chloroplast stroma (GO:0009570);; Biological Process: isopentenyl diphosphate biosynthetic process, methylerythritol 4-phosphate pathway (GO:0019288);; Molecular Function: 4-hydroxy-3-methylbut-2-en-1-yl diphosphate synthase activity (GO:0046429);; Biological Process: response to antibiotic (GO:0046677);; Molecular Function: 4-hydroxy-3-methylbut-2-en-1-yl diphosphate reductas…	K03527|0|sly:100316901|ISPH protein; K03527 4-hydroxy-3-methylbut-2-enyl diphosphate reductase [EC:1.17.1.2] (A)	ko00900:Terpenoid backbone biosynthesis	--	--	LytB protein;; LytB protein	4-hydroxy-3-methylbut-2-enyl diphosphate reductase, chloroplastic (Precursor) GN=F10M10.120 OS=Arabidopsis thaliana (Mouse-ear cress) PE=2 SV=1	I	Lipid transport and metabolism	PREDICTED: 4-hydroxy-3-methylbut-2-enyl diphosphate reductase, chloroplastic [Sesamum indicum]
F01_cb9071_c9/f1p0/1125	[I]	Lipid transport and metabolism	Molecular Function: isopentenyl-diphosphate delta-isomerase activity (GO:0004452);; Biological Process: isoprenoid biosynthetic process (GO:0008299);; Cellular Component: chloroplast (GO:0009507);; Molecular Function: hydrolase activity (GO:0016787);;	K01823|6.77942e-157|sot:102580973|isopentenyl-diphosphate Delta-isomerase II-like; K01823 isopentenyl-diphosphate delta-isomerase [EC:5.3.3.2] (A)	ko00900:Terpenoid backbone biosynthesis	[Q]	Secondary metabolites biosynthesis, transport and catabolism	NUDIX domain	Isopentenyl-diphosphate Delta-isomerase II GN=IPI2 OS=Camptotheca acuminata (Happy tree) PE=2 SV=1	I	Lipid transport and metabolism	PREDICTED: isopentenyl-diphosphate Delta-isomerase I [Sesamum indicum]
F01_cb9071_c7/f1p0/1527	[I]	Lipid transport and metabolism	Molecular Function: isopentenyl-diphosphate delta-isomerase activity (GO:0004452);; Biological Process: isoprenoid biosynthetic process (GO:0008299);; Biological Process: photosynthesis (GO:0015979);; Biological Process: chlorophyll biosynthetic process (GO:0015995);; Molecular Function: hydrolase activity (GO:0016787);; Molecular Function: metal ion binding (GO:0046872);; Biological Process: dim…	K01823|4.75676e-94|sot:102580973|isopentenyl-diphosphate Delta-isomerase II-like; K01823 isopentenyl-diphosphate delta-isomerase [EC:5.3.3.2] (A)	ko00900:Terpenoid backbone biosynthesis	[Q]	Secondary metabolites biosynthesis, transport and catabolism	NUDIX domain	Isopentenyl-diphosphate Delta-isomerase I GN=IPI1 OS=Camptotheca acuminata (Happy tree) PE=2 SV=1	I	Lipid transport and metabolism	isopentenyl-diphosphate isomerase [Humulus lupulus]
F01_cb4189_c9/f1p0/1797	[H]	Coenzyme transport and metabolism	Molecular Function: dimethylallyltranstransferase activity (GO:0004161);; Biological Process: isoprenoid biosynthetic process (GO:0008299);;	K00787|9.32432e-142|cmo:103501295|farnesyl pyrophosphate synthase 1; K00787 farnesyl diphosphate synthase [EC:2.5.1.1 2.5.1.10] (A)	ko00900:Terpenoid backbone biosynthesis	[H]	Coenzyme transport and metabolism	Polyprenyl synthetase;; Polyprenyl synthetase	Farnesyl pyrophosphate synthase 1 GN=FPS1 OS=Lupinus albus (White lupin) PE=2 SV=1	H	Coenzyme transport and metabolism	farnesyl diphosphate synthase [Bacopa monnieri]
F02_cb11041_c72793/f6p1/1662	[I]	Lipid transport and metabolism	Molecular Function: ATP binding (GO:0005524);; Biological Process: heme biosynthetic process (GO:0006783);; Cellular Component: chloroplast (GO:0009507);; Cellular Component: chromoplast (GO:0009509);; Biological Process: response to blue light (GO:0009637);; Biological Process: response to high light intensity (GO:0009644);; Biological Process: response to sucrose (GO:0009744);; Biological Proce…	K00919|0|sot:102601451|4-diphosphocytidyl-2-C-methyl-D-erythritol kinase, chloroplastic/chromoplastic-like; K00919 4-diphosphocytidyl-2-C-methyl-D-erythritol kinase [EC:2.7.1.148] (A)	ko00900:Terpenoid backbone biosynthesis	--	--	GHMP kinases N terminal domain	4-diphosphocytidyl-2-C-methyl-D-erythritol kinase, chloroplastic (Precursor) GN=ISPE OS=Mentha piperita (Peppermint) PE=1 SV=1	I	Lipid transport and metabolism	4-diphosphocytidyl-2-C-methyl-D-erythritol kinase [Salvia miltiorrhiza]
F02_cb7697_c15/f8p0/1560	[IM]	--	Biological Process: isopentenyl diphosphate biosynthetic process, methylerythritol 4-phosphate pathway (GO:0019288);; Biological Process: oxidation-reduction process (GO:0055114);;	K03527|0|vvi:100267479|4-hydroxy-3-methylbut-2-enyl diphosphate reductase, chloroplastic; K03527 4-hydroxy-3-methylbut-2-enyl diphosphate reductase [EC:1.17.1.2] (A)	ko00900:Terpenoid backbone biosynthesis	--	--	LytB protein	4-hydroxy-3-methylbut-2-enyl diphosphate reductase, chloroplastic (Precursor) GN=F10M10.120 OS=Arabidopsis thaliana (Mouse-ear cress) PE=2 SV=1	I	Lipid transport and metabolism	PREDICTED: 4-hydroxy-3-methylbut-2-enyl diphosphate reductase, chloroplastic [Sesamum indicum]
F01_cb16438_c4597/f1p0/2615	[I]	Lipid transport and metabolism	Molecular Function: iron ion binding (GO:0005506);; Biological Process: terpenoid biosynthetic process (GO:0016114);; Molecular Function: 4-hydroxy-3-methylbut-2-en-1-yl diphosphate synthase activity (GO:0046429);; Biological Process: oxidation-reduction process (GO:0055114);;	K03526|0|mdm:103413028|4-hydroxy-3-methylbut-2-en-1-yl diphosphate synthase, chloroplastic; K03526 (E)-4-hydroxy-3-methylbut-2-enyl-diphosphate synthase [EC:1.17.7.1 1.17.7.3] (A)	ko00900:Terpenoid backbone biosynthesis	--	--	GcpE protein	4-hydroxy-3-methylbut-2-en-1-yl diphosphate synthase, chloroplastic (Precursor) GN=MUP24.2 OS=Arabidopsis thaliana (Mouse-ear cress) PE=1 SV=1	I	Lipid transport and metabolism	(E)-4-hydroxy-3-methylbut-2-enyl diphosphate synthase [Salvia miltiorrhiza f. alba]
F01_cb16438_c39527/f1p0/2294	[I]	Lipid transport and metabolism	Molecular Function: hydroxymethylglutaryl-CoA reductase (NADPH) activity (GO:0004420);; Cellular Component: endoplasmic reticulum membrane (GO:0005789);; Biological Process: isoprenoid biosynthetic process (GO:0008299);; Biological Process: coenzyme A metabolic process (GO:0015936);; Cellular Component: integral component of membrane (GO:0016021);; Molecular Function: NADP binding (GO:0050661);; …	K00021|0|sot:102577899|3-hydroxy-3-methylglutaryl coenzyme A reductase; K00021 hydroxymethylglutaryl-CoA reductase (NADPH) [EC:1.1.1.34] (A)	ko00900:Terpenoid backbone biosynthesis	[I]	Lipid transport and metabolism	Hydroxymethylglutaryl-coenzyme A reductase	3-hydroxy-3-methylglutaryl-coenzyme A reductase OS=Camptotheca acuminata (Happy tree) PE=3 SV=1	I	Lipid transport and metabolism	hypothetical protein MIMGU_mgv1a003590mg [Erythranthe guttata]
F02_cb7697_c21/f1p0/1866	[IM]	--	Biological Process: isopentenyl diphosphate biosynthetic process, methylerythritol 4-phosphate pathway (GO:0019288);; Biological Process: oxidation-reduction process (GO:0055114);;	K03527|0|vvi:100267479|4-hydroxy-3-methylbut-2-enyl diphosphate reductase, chloroplastic; K03527 4-hydroxy-3-methylbut-2-enyl diphosphate reductase [EC:1.17.1.2] (A)	ko00900:Terpenoid backbone biosynthesis	--	--	LytB protein	4-hydroxy-3-methylbut-2-enyl diphosphate reductase, chloroplastic (Precursor) GN=F10M10.120 OS=Arabidopsis thaliana (Mouse-ear cress) PE=2 SV=1	I	Lipid transport and metabolism	PREDICTED: 4-hydroxy-3-methylbut-2-enyl diphosphate reductase, chloroplastic [Sesamum indicum]
F01_cb16438_c35607/f1p0/2504	[I]	Lipid transport and metabolism	Molecular Function: transferase activity, transferring alkyl or aryl (other than methyl) groups (GO:0016765);;	K11778|1.73656e-125|vvi:100251570|dehydrodolichyl diphosphate synthase 6-like; K11778 ditrans,polycis-polyprenyl diphosphate synthase [EC:2.5.1.87] (A)	ko00900:Terpenoid backbone biosynthesis	[I]	Lipid transport and metabolism	Putative undecaprenyl diphosphate synthase	Dehydrodolichyl diphosphate synthase 6 GN=At2g17570 OS=Arabidopsis thaliana (Mouse-ear cress) PE=2 SV=2	I	Lipid transport and metabolism	PREDICTED: dehydrodolichyl diphosphate synthase 6-like [Sesamum indicum]
F02_cb11041_c77279/f1p0/1711	[I]	Lipid transport and metabolism	Biological Process: maltose metabolic process (GO:0000023);; Biological Process: sulfur amino acid metabolic process (GO:0000096);; Biological Process: pentose-phosphate shunt (GO:0006098);; Biological Process: glycine catabolic process (GO:0006546);; Biological Process: unsaturated fatty acid biosynthetic process (GO:0006636);; Biological Process: phosphatidylglycerol biosynthetic process (GO:00…	K00099|0|rcu:RCOM_1510580|1-deoxy-D-xylulose 5-phosphate reductoisomerase, chloroplast precursor, putative (EC:1.1.1.267); K00099 1-deoxy-D-xylulose-5-phosphate reductoisomerase [EC:1.1.1.267] (A)	ko00900:Terpenoid backbone biosynthesis	--	--	DXP reductoisomerase C-terminal domain;; 1-deoxy-D-xylulose 5-phosphate reductoisomerase C-terminal;; 1-deoxy-D-xylulose 5-phosphate reductoisomerase	1-deoxy-D-xylulose 5-phosphate reductoisomerase, chloroplastic (Precursor) GN=DXR OS=Mentha piperita (Peppermint) PE=2 SV=2	I	Lipid transport and metabolism	PREDICTED: 1-deoxy-D-xylulose 5-phosphate reductoisomerase, chloroplastic [Sesamum indicum]
F02_cb10536_c7/f1p2/1755	[I]	Lipid transport and metabolism	Molecular Function: diphosphomevalonate decarboxylase activity (GO:0004163);; Molecular Function: ATP binding (GO:0005524);; Biological Process: isoprenoid biosynthetic process (GO:0008299);; Molecular Function: protein homodimerization activity (GO:0042803);;	K01597|0|vvi:100251686|diphosphomevalonate decarboxylase; K01597 diphosphomevalonate decarboxylase [EC:4.1.1.33] (A)	ko00900:Terpenoid backbone biosynthesis	[I]	Lipid transport and metabolism	GHMP kinases N terminal domain	--	I	Lipid transport and metabolism	mevalonate diphosphate decarboxylase [Salvia miltiorrhiza]
F01_cb16438_c12648/f1p0/1996	[I]	Lipid transport and metabolism	Molecular Function: hydroxymethylglutaryl-CoA reductase (NADPH) activity (GO:0004420);; Cellular Component: endoplasmic reticulum membrane (GO:0005789);; Biological Process: isoprenoid biosynthetic process (GO:0008299);; Biological Process: coenzyme A metabolic process (GO:0015936);; Cellular Component: integral component of membrane (GO:0016021);; Molecular Function: NADP binding (GO:0050661);; …	K00021|0|sot:102577899|3-hydroxy-3-methylglutaryl coenzyme A reductase; K00021 hydroxymethylglutaryl-CoA reductase (NADPH) [EC:1.1.1.34] (A)	ko00900:Terpenoid backbone biosynthesis	[I]	Lipid transport and metabolism	Hydroxymethylglutaryl-coenzyme A reductase	3-hydroxy-3-methylglutaryl-coenzyme A reductase OS=Camptotheca acuminata (Happy tree) PE=3 SV=1	I	Lipid transport and metabolism	PREDICTED: 3-hydroxy-3-methylglutaryl-coenzyme A reductase [Sesamum indicum]
F02_cb4839_c8/f1p1/1408	[H]	Coenzyme transport and metabolism	Molecular Function: dimethylallyltranstransferase activity (GO:0004161);; Molecular Function: geranyltranstransferase activity (GO:0004337);; Biological Process: isoprenoid biosynthetic process (GO:0008299);;	K00787|0|cmo:103501295|farnesyl pyrophosphate synthase 1; K00787 farnesyl diphosphate synthase [EC:2.5.1.1 2.5.1.10] (A)	ko00900:Terpenoid backbone biosynthesis	[H]	Coenzyme transport and metabolism	Polyprenyl synthetase	Farnesyl pyrophosphate synthase 1 GN=FPS1 OS=Lupinus albus (White lupin) PE=2 SV=1	H	Coenzyme transport and metabolism	farnesyl diphosphate synthetase [Salvia miltiorrhiza]
F02_cb11041_c73894/f5p0/2057	[I]	Lipid transport and metabolism	Biological Process: maltose metabolic process (GO:0000023);; Biological Process: sulfur amino acid metabolic process (GO:0000096);; Biological Process: pentose-phosphate shunt (GO:0006098);; Biological Process: glycine catabolic process (GO:0006546);; Biological Process: unsaturated fatty acid biosynthetic process (GO:0006636);; Biological Process: phosphatidylglycerol biosynthetic process (GO:00…	K00099|0|sly:543682|DXR; 1-deoxy-D-xylulose-5-phosphate reductoisomerase; K00099 1-deoxy-D-xylulose-5-phosphate reductoisomerase [EC:1.1.1.267] (A)	ko00900:Terpenoid backbone biosynthesis	--	--	1-deoxy-D-xylulose 5-phosphate reductoisomerase;; DXP reductoisomerase C-terminal domain;; 1-deoxy-D-xylulose 5-phosphate reductoisomerase C-terminal	1-deoxy-D-xylulose 5-phosphate reductoisomerase, chloroplastic (Precursor) GN=DXR OS=Mentha piperita (Peppermint) PE=2 SV=2	I	Lipid transport and metabolism	PREDICTED: 1-deoxy-D-xylulose 5-phosphate reductoisomerase, chloroplastic [Sesamum indicum]
F01_cb16438_c21555/f2p1/2184	[I]	Lipid transport and metabolism	Molecular Function: hydroxymethylglutaryl-CoA reductase (NADPH) activity (GO:0004420);; Cellular Component: endoplasmic reticulum membrane (GO:0005789);; Biological Process: isoprenoid biosynthetic process (GO:0008299);; Biological Process: coenzyme A metabolic process (GO:0015936);; Cellular Component: integral component of membrane (GO:0016021);; Molecular Function: NADP binding (GO:0050661);; …	K00021|0|sot:102577899|3-hydroxy-3-methylglutaryl coenzyme A reductase; K00021 hydroxymethylglutaryl-CoA reductase (NADPH) [EC:1.1.1.34] (A)	ko00900:Terpenoid backbone biosynthesis	[I]	Lipid transport and metabolism	Hydroxymethylglutaryl-coenzyme A reductase;; Hydroxymethylglutaryl-coenzyme A reductase	3-hydroxy-3-methylglutaryl-coenzyme A reductase OS=Camptotheca acuminata (Happy tree) PE=3 SV=1	I	Lipid transport and metabolism	hypothetical protein MIMGU_mgv1a003590mg [Erythranthe guttata]
F02_cb11041_c50034/f1p0/2283	[I]	Lipid transport and metabolism	Cellular Component: membrane (GO:0016020);; Cellular Component: intracellular membrane-bounded organelle (GO:0043231);; Cellular Component: cytoplasmic part (GO:0044444);;	K00021|6.4087e-54|pop:POPTR_0001s46120g|POPTRDRAFT_798252; 3-hydroxy-3-methylglutaryl coenzyme A reductase family protein; K00021 hydroxymethylglutaryl-CoA reductase (NADPH) [EC:1.1.1.34] (A)	ko00900:Terpenoid backbone biosynthesis	[I]	Lipid transport and metabolism	Hydroxymethylglutaryl-coenzyme A reductase;; Hydroxymethylglutaryl-coenzyme A reductase;; Hydroxymethylglutaryl-coenzyme A reductase;; Hydroxymethylglutaryl-coenzyme A reductase	3-hydroxy-3-methylglutaryl-coenzyme A reductase 1 GN=HMGR1 OS=Hevea brasiliensis (Para rubber tree) PE=2 SV=1	I	Lipid transport and metabolism	PREDICTED: 3-hydroxy-3-methylglutaryl-coenzyme A reductase [Sesamum indicum]
F01_cb16438_c2726/f1p1/1989	[IM]	--	Biological Process: isopentenyl diphosphate biosynthetic process, methylerythritol 4-phosphate pathway (GO:0019288);; Biological Process: oxidation-reduction process (GO:0055114);;	K03527|0|vvi:100267479|4-hydroxy-3-methylbut-2-enyl diphosphate reductase, chloroplastic; K03527 4-hydroxy-3-methylbut-2-enyl diphosphate reductase [EC:1.17.1.2] (A)	ko00900:Terpenoid backbone biosynthesis	--	--	LytB protein;; LytB protein	4-hydroxy-3-methylbut-2-enyl diphosphate reductase, chloroplastic (Precursor) GN=F10M10.120 OS=Arabidopsis thaliana (Mouse-ear cress) PE=2 SV=1	I	Lipid transport and metabolism	hypothetical protein MIMGU_mgv1a005937mg [Erythranthe guttata]
F02_cb9382_c8/f1p0/1871	[I]	Lipid transport and metabolism	Molecular Function: phosphomevalonate kinase activity (GO:0004631);; Molecular Function: ATP binding (GO:0005524);; Biological Process: sterol biosynthetic process (GO:0016126);; Biological Process: phosphorylation (GO:0016310);; Biological Process: pentacyclic triterpenoid biosynthetic process (GO:0019745);;	K00938|0|sly:101256682|probable phosphomevalonate kinase; K00938 phosphomevalonate kinase [EC:2.7.4.2] (A)	ko00900:Terpenoid backbone biosynthesis	[I]	Lipid transport and metabolism	GHMP kinases N terminal domain;; GHMP kinases C terminal	--	I	Lipid transport and metabolism	5-phosphomevalonate kinase [Salvia miltiorrhiza]
F02_cb11946_c29/f1p0/1293	[H]	Coenzyme transport and metabolism	Molecular Function: dimethylallyltranstransferase activity (GO:0004161);; Molecular Function: farnesyltranstransferase activity (GO:0004311);; Molecular Function: geranyltranstransferase activity (GO:0004337);; Cellular Component: chloroplast (GO:0009507);; Biological Process: carotenoid biosynthetic process (GO:0016117);; Biological Process: geranyl diphosphate biosynthetic process (GO:0033384);…	K13789|8.77966e-134|vvi:100257359|geranylgeranyl pyrophosphate synthase, chloroplastic; K13789 geranylgeranyl diphosphate synthase, type II [EC:2.5.1.1 2.5.1.10 2.5.1.29] (A)	ko00900:Terpenoid backbone biosynthesis	[H]	Coenzyme transport and metabolism	Polyprenyl synthetase	Geranylgeranyl pyrophosphate synthase, chloroplastic (Precursor) GN=GGPS1 OS=Capsicum annuum (Bell pepper) PE=3 SV=1	H	Coenzyme transport and metabolism	PREDICTED: geranylgeranyl pyrophosphate synthase, chloroplastic-like [Sesamum indicum]
F01_cb13703_c9/f5p1/1298	--	--	Biological Process: cellular process (GO:0009987);; Biological Process: response to stimulus (GO:0050896);;	K11778|1.0653e-89|sot:102596985|nogo-B receptor-like; K11778 ditrans,polycis-polyprenyl diphosphate synthase [EC:2.5.1.87] (A)	ko00900:Terpenoid backbone biosynthesis	--	--	--	--	S	Function unknown	PREDICTED: dehydrodolichyl diphosphate syntase complex subunit nus1-like [Sesamum indicum]
F01_cb16438_c42239/f1p0/2509	[I]	Lipid transport and metabolism	Molecular Function: hydroxymethylglutaryl-CoA reductase (NADPH) activity (GO:0004420);; Cellular Component: endoplasmic reticulum membrane (GO:0005789);; Biological Process: isoprenoid biosynthetic process (GO:0008299);; Biological Process: coenzyme A metabolic process (GO:0015936);; Cellular Component: integral component of membrane (GO:0016021);; Molecular Function: NADP binding (GO:0050661);; …	K00021|0|sot:102577899|3-hydroxy-3-methylglutaryl coenzyme A reductase; K00021 hydroxymethylglutaryl-CoA reductase (NADPH) [EC:1.1.1.34] (A)	ko00900:Terpenoid backbone biosynthesis	[I]	Lipid transport and metabolism	Hydroxymethylglutaryl-coenzyme A reductase	3-hydroxy-3-methylglutaryl-coenzyme A reductase GN=HMGR OS=Nicotiana sylvestris (Wood tobacco) PE=2 SV=1	I	Lipid transport and metabolism	hypothetical protein MIMGU_mgv1a003590mg [Erythranthe guttata]
F02_cb8254_c0/f1p0/2249	--	--	--	K00919|2.11951e-10|pop:POPTR_0001s23230g|POPTRDRAFT_181114; hypothetical protein; K00919 4-diphosphocytidyl-2-C-methyl-D-erythritol kinase [EC:2.7.1.148] (A)	ko00900:Terpenoid backbone biosynthesis	--	--	--	4-diphosphocytidyl-2-C-methyl-D-erythritol kinase, chloroplastic/chromoplastic (Precursor; Fragment) GN=ISPE OS=Solanum lycopersicum (Tomato) PE=1 SV=1	I	Lipid transport and metabolism	putative chloroplast 4-(cytidine 5&apos;-diphospho)-2-C-methyl-D-erythritol kinase [Populus trichocarpa]
F02_cb2495_c3/f1p0/1594	[I]	Lipid transport and metabolism	Molecular Function: transferase activity, transferring alkyl or aryl (other than methyl) groups (GO:0016765);;	K11778|2.84396e-135|vvi:100251570|dehydrodolichyl diphosphate synthase 6-like; K11778 ditrans,polycis-polyprenyl diphosphate synthase [EC:2.5.1.87] (A)	ko00900:Terpenoid backbone biosynthesis	[I]	Lipid transport and metabolism	Putative undecaprenyl diphosphate synthase	Dehydrodolichyl diphosphate synthase 6 GN=At2g17570 OS=Arabidopsis thaliana (Mouse-ear cress) PE=2 SV=2	I	Lipid transport and metabolism	PREDICTED: dehydrodolichyl diphosphate synthase 6-like [Sesamum indicum]
F01_cb8168_c1/f1p0/2332	[I]	Lipid transport and metabolism	Molecular Function: hydroxymethylglutaryl-CoA reductase (NADPH) activity (GO:0004420);; Biological Process: isoprenoid biosynthetic process (GO:0008299);; Biological Process: coenzyme A metabolic process (GO:0015936);; Cellular Component: integral component of membrane (GO:0016021);; Molecular Function: NADP binding (GO:0050661);; Biological Process: oxidation-reduction process (GO:0055114);;	K00021|0|sot:102585007|3-hydroxy-3-methylglutaryl-coenzyme A reductase 1-like; K00021 hydroxymethylglutaryl-CoA reductase (NADPH) [EC:1.1.1.34] (A)	ko00900:Terpenoid backbone biosynthesis	[I]	Lipid transport and metabolism	Hydroxymethylglutaryl-coenzyme A reductase	3-hydroxy-3-methylglutaryl-coenzyme A reductase 1 GN=HMGR1 OS=Hevea brasiliensis (Para rubber tree) PE=2 SV=1	I	Lipid transport and metabolism	3-hydroxy-3-methylglutaryl-coenzyme A reductase [Salvia miltiorrhiza]
F01_cb16438_c16201/f1p1/1784	[I]	Lipid transport and metabolism	Molecular Function: hydroxymethylglutaryl-CoA reductase (NADPH) activity (GO:0004420);; Cellular Component: endoplasmic reticulum (GO:0005783);; Biological Process: isoprenoid biosynthetic process (GO:0008299);; Biological Process: coenzyme A metabolic process (GO:0015936);; Cellular Component: integral component of membrane (GO:0016021);; Molecular Function: NADP binding (GO:0050661);; Biologica…	K00021|1.91715e-158|sot:102599791|hmg1; 3-hydroxy-3-methylglutaryl-coenzyme A reductase 1-like; K00021 hydroxymethylglutaryl-CoA reductase (NADPH) [EC:1.1.1.34] (A)	ko00900:Terpenoid backbone biosynthesis	[I]	Lipid transport and metabolism	Hydroxymethylglutaryl-coenzyme A reductase	3-hydroxy-3-methylglutaryl-coenzyme A reductase OS=Camptotheca acuminata (Happy tree) PE=3 SV=1	I	Lipid transport and metabolism	hypothetical protein MIMGU_mgv1a003590mg [Erythranthe guttata]
F02_cb8613_c7/f1p0/2166	[H]	Coenzyme transport and metabolism	Molecular Function: dimethylallyltranstransferase activity (GO:0004161);; Biological Process: isoprenoid biosynthetic process (GO:0008299);; Cellular Component: plastid (GO:0009536);;	K14066|5.23989e-145|sot:102588989|solanesyl diphosphate synthase 3, chloroplastic/mitochondrial-like; K14066 geranyl diphosphate synthase [EC:2.5.1.1] (A)	ko00900:Terpenoid backbone biosynthesis	[H]	Coenzyme transport and metabolism	Polyprenyl synthetase	Solanesyl-diphosphate synthase 1, mitochondrial (Precursor) GN=SPS1 OS=Oryza sativa subsp. japonica (Rice) PE=1 SV=1	H	Coenzyme transport and metabolism	PREDICTED: solanesyl diphosphate synthase 3, chloroplastic/mitochondrial isoform X1 [Sesamum indicum]
F02_cb11607_c9/f1p1/1196	[I]	Lipid transport and metabolism	Molecular Function: isopentenyl-diphosphate delta-isomerase activity (GO:0004452);; Biological Process: isoprenoid biosynthetic process (GO:0008299);; Molecular Function: hydrolase activity (GO:0016787);;	K01823|1.82301e-157|sot:102580973|isopentenyl-diphosphate Delta-isomerase II-like; K01823 isopentenyl-diphosphate delta-isomerase [EC:5.3.3.2] (A)	ko00900:Terpenoid backbone biosynthesis	[Q]	Secondary metabolites biosynthesis, transport and catabolism	NUDIX domain	Isopentenyl-diphosphate Delta-isomerase II GN=IPI2 OS=Camptotheca acuminata (Happy tree) PE=2 SV=1	I	Lipid transport and metabolism	PREDICTED: isopentenyl-diphosphate Delta-isomerase II-like [Solanum tuberosum]
F01_cb4189_c4/f2p0/2869	[H]	Coenzyme transport and metabolism	Molecular Function: dimethylallyltranstransferase activity (GO:0004161);; Molecular Function: geranyltranstransferase activity (GO:0004337);; Biological Process: isoprenoid biosynthetic process (GO:0008299);;	K00787|0|pop:POPTR_0006s00530g|POPTRDRAFT_560081; farnesyl-pyrophosphate synthetase fps2 family protein; K00787 farnesyl diphosphate synthase [EC:2.5.1.1 2.5.1.10] (A)	ko00900:Terpenoid backbone biosynthesis	[H]	Coenzyme transport and metabolism	Polyprenyl synthetase	Farnesyl pyrophosphate synthase 1 GN=FPS1 OS=Lupinus albus (White lupin) PE=2 SV=1	H	Coenzyme transport and metabolism	farnesyl diphosphate synthetase [Salvia miltiorrhiza]
F02_cb2495_c18/f1p0/1477	[I]	Lipid transport and metabolism	Molecular Function: transferase activity, transferring alkyl or aryl (other than methyl) groups (GO:0016765);;	K11778|9.46013e-130|vvi:100251570|dehydrodolichyl diphosphate synthase 6-like; K11778 ditrans,polycis-polyprenyl diphosphate synthase [EC:2.5.1.87] (A)	ko00900:Terpenoid backbone biosynthesis	[I]	Lipid transport and metabolism	Putative undecaprenyl diphosphate synthase	Dehydrodolichyl diphosphate synthase 6 GN=At2g17570 OS=Arabidopsis thaliana (Mouse-ear cress) PE=2 SV=2	I	Lipid transport and metabolism	PREDICTED: dehydrodolichyl diphosphate synthase 6-like [Sesamum indicum]
F01_cb16438_c12680/f2p0/2089	[I]	Lipid transport and metabolism	Molecular Function: hydroxymethylglutaryl-CoA reductase (NADPH) activity (GO:0004420);; Cellular Component: endoplasmic reticulum membrane (GO:0005789);; Biological Process: isoprenoid biosynthetic process (GO:0008299);; Biological Process: coenzyme A metabolic process (GO:0015936);; Cellular Component: integral component of membrane (GO:0016021);; Molecular Function: NADP binding (GO:0050661);; …	K00021|0|csv:101225491|3-hydroxy-3-methylglutaryl-coenzyme A reductase 1-like; K00021 hydroxymethylglutaryl-CoA reductase (NADPH) [EC:1.1.1.34] (A)	ko00900:Terpenoid backbone biosynthesis	[I]	Lipid transport and metabolism	Hydroxymethylglutaryl-coenzyme A reductase	3-hydroxy-3-methylglutaryl-coenzyme A reductase OS=Camptotheca acuminata (Happy tree) PE=3 SV=1	I	Lipid transport and metabolism	PREDICTED: 3-hydroxy-3-methylglutaryl-coenzyme A reductase [Sesamum indicum]
F02_cb11041_c53859/f1p0/2142	[I]	Lipid transport and metabolism	Molecular Function: hydroxymethylglutaryl-CoA reductase (NADPH) activity (GO:0004420);; Cellular Component: endoplasmic reticulum membrane (GO:0005789);; Biological Process: isoprenoid biosynthetic process (GO:0008299);; Biological Process: coenzyme A metabolic process (GO:0015936);; Cellular Component: integral component of membrane (GO:0016021);; Molecular Function: NADP binding (GO:0050661);; …	K00021|0|sot:102577899|3-hydroxy-3-methylglutaryl coenzyme A reductase; K00021 hydroxymethylglutaryl-CoA reductase (NADPH) [EC:1.1.1.34] (A)	ko00900:Terpenoid backbone biosynthesis	[I]	Lipid transport and metabolism	Hydroxymethylglutaryl-coenzyme A reductase	3-hydroxy-3-methylglutaryl-coenzyme A reductase OS=Camptotheca acuminata (Happy tree) PE=3 SV=1	I	Lipid transport and metabolism	hypothetical protein MIMGU_mgv1a003590mg [Erythranthe guttata]
F01_cb4189_c5/f1p0/2941	[H]	Coenzyme transport and metabolism	Molecular Function: dimethylallyltranstransferase activity (GO:0004161);; Molecular Function: geranyltranstransferase activity (GO:0004337);; Biological Process: isoprenoid biosynthetic process (GO:0008299);;	K00787|1.33449e-146|cmo:103501295|farnesyl pyrophosphate synthase 1; K00787 farnesyl diphosphate synthase [EC:2.5.1.1 2.5.1.10] (A)	ko00900:Terpenoid backbone biosynthesis	[H]	Coenzyme transport and metabolism	Polyprenyl synthetase;; Polyprenyl synthetase	Farnesyl pyrophosphate synthase 1 GN=FPS1 OS=Lupinus albus (White lupin) PE=2 SV=1	H	Coenzyme transport and metabolism	PREDICTED: farnesyl pyrophosphate synthase 1 [Sesamum indicum]
F01_cb9071_c6/f1p0/1664	[I]	Lipid transport and metabolism	Molecular Function: isopentenyl-diphosphate delta-isomerase activity (GO:0004452);; Biological Process: isoprenoid biosynthetic process (GO:0008299);; Molecular Function: hydrolase activity (GO:0016787);;	K01823|2.20486e-154|sot:102580973|isopentenyl-diphosphate Delta-isomerase II-like; K01823 isopentenyl-diphosphate delta-isomerase [EC:5.3.3.2] (A)	ko00900:Terpenoid backbone biosynthesis	[Q]	Secondary metabolites biosynthesis, transport and catabolism	NUDIX domain	Isopentenyl-diphosphate Delta-isomerase I GN=IPI1 OS=Camptotheca acuminata (Happy tree) PE=2 SV=1	I	Lipid transport and metabolism	PREDICTED: isopentenyl-diphosphate Delta-isomerase I [Sesamum indicum]
F01_cb9887_c5/f1p1/1630	[H]	Coenzyme transport and metabolism	Molecular Function: transferase activity (GO:0016740);;	K05356|1.46798e-109|rcu:RCOM_1182760|solanesyl diphosphate synthase, putative (EC:2.5.1.30); K05356 all-trans-nonaprenyl-diphosphate synthase [EC:2.5.1.84 2.5.1.85] (A)	ko00900:Terpenoid backbone biosynthesis	[H]	Coenzyme transport and metabolism	Polyprenyl synthetase;; Polyprenyl synthetase	Solanesyl diphosphate synthase 1 GN=T30F21.15 OS=Arabidopsis thaliana (Mouse-ear cress) PE=1 SV=1	H	Coenzyme transport and metabolism	PREDICTED: probable solanesyl-diphosphate synthase 3, chloroplastic isoform X1 [Sesamum indicum]
F01_cb9742_c11/f1p0/854	--	--	Molecular Function: transferase activity, transferring alkyl or aryl (other than methyl) groups (GO:0016765);;	K14066|5.44787e-14|sot:102588989|solanesyl diphosphate synthase 3, chloroplastic/mitochondrial-like; K14066 geranyl diphosphate synthase [EC:2.5.1.1] (A)	ko00900:Terpenoid backbone biosynthesis	--	--	--	Solanesyl diphosphate synthase 3, chloroplastic/mitochondrial (Precursor) GN=T31E10.3 OS=Arabidopsis thaliana (Mouse-ear cress) PE=1 SV=1	H	Coenzyme transport and metabolism	PREDICTED: solanesyl diphosphate synthase 3, chloroplastic/mitochondrial isoform X1 [Sesamum indicum]
F02_cb11041_c38695/f1p0/2329	[I]	Lipid transport and metabolism	Molecular Function: hydroxymethylglutaryl-CoA reductase (NADPH) activity (GO:0004420);; Cellular Component: endoplasmic reticulum membrane (GO:0005789);; Biological Process: isoprenoid biosynthetic process (GO:0008299);; Biological Process: coenzyme A metabolic process (GO:0015936);; Cellular Component: integral component of membrane (GO:0016021);; Molecular Function: NADP binding (GO:0050661);; …	K00021|0|sot:102577899|3-hydroxy-3-methylglutaryl coenzyme A reductase; K00021 hydroxymethylglutaryl-CoA reductase (NADPH) [EC:1.1.1.34] (A)	ko00900:Terpenoid backbone biosynthesis	[I]	Lipid transport and metabolism	Hydroxymethylglutaryl-coenzyme A reductase	3-hydroxy-3-methylglutaryl-coenzyme A reductase OS=Camptotheca acuminata (Happy tree) PE=3 SV=1	I	Lipid transport and metabolism	hypothetical protein MIMGU_mgv1a003590mg [Erythranthe guttata]
F01_cb16438_c46220/f1p0/2137	[I]	Lipid transport and metabolism	Molecular Function: transferase activity, transferring alkyl or aryl (other than methyl) groups (GO:0016765);;	K11778|6.15249e-127|vvi:100251570|dehydrodolichyl diphosphate synthase 6-like; K11778 ditrans,polycis-polyprenyl diphosphate synthase [EC:2.5.1.87] (A)	ko00900:Terpenoid backbone biosynthesis	[I]	Lipid transport and metabolism	Putative undecaprenyl diphosphate synthase	Dehydrodolichyl diphosphate synthase 6 GN=At2g17570 OS=Arabidopsis thaliana (Mouse-ear cress) PE=2 SV=2	I	Lipid transport and metabolism	PREDICTED: dehydrodolichyl diphosphate synthase 6-like [Sesamum indicum]
F01_cb16438_c41334/f1p1/2178	[I]	Lipid transport and metabolism	Molecular Function: hydroxymethylglutaryl-CoA reductase (NADPH) activity (GO:0004420);; Cellular Component: endoplasmic reticulum membrane (GO:0005789);; Biological Process: isoprenoid biosynthetic process (GO:0008299);; Biological Process: coenzyme A metabolic process (GO:0015936);; Cellular Component: integral component of membrane (GO:0016021);; Molecular Function: NADP binding (GO:0050661);; …	K00021|0|sot:102599791|hmg1; 3-hydroxy-3-methylglutaryl-coenzyme A reductase 1-like; K00021 hydroxymethylglutaryl-CoA reductase (NADPH) [EC:1.1.1.34] (A)	ko00900:Terpenoid backbone biosynthesis	[I]	Lipid transport and metabolism	Hydroxymethylglutaryl-coenzyme A reductase	3-hydroxy-3-methylglutaryl-coenzyme A reductase OS=Camptotheca acuminata (Happy tree) PE=3 SV=1	I	Lipid transport and metabolism	PREDICTED: 3-hydroxy-3-methylglutaryl-coenzyme A reductase [Sesamum indicum]
F01_cb9071_c8/f1p0/1201	[I]	Lipid transport and metabolism	Molecular Function: isopentenyl-diphosphate delta-isomerase activity (GO:0004452);; Biological Process: isoprenoid biosynthetic process (GO:0008299);; Cellular Component: chloroplast (GO:0009507);; Biological Process: photosynthesis (GO:0015979);; Biological Process: chlorophyll biosynthetic process (GO:0015995);; Molecular Function: hydrolase activity (GO:0016787);; Molecular Function: metal ion…	K01823|2.34362e-138|sot:102580973|isopentenyl-diphosphate Delta-isomerase II-like; K01823 isopentenyl-diphosphate delta-isomerase [EC:5.3.3.2] (A)	ko00900:Terpenoid backbone biosynthesis	[Q]	Secondary metabolites biosynthesis, transport and catabolism	NUDIX domain	Isopentenyl-diphosphate Delta-isomerase I GN=IPI1 OS=Camptotheca acuminata (Happy tree) PE=2 SV=1	I	Lipid transport and metabolism	isopentenyl diphosphate isomerase [Ipomoea sp. Kenyan]
F01_cb12076_c24/f1p1/1670	[O]	Posttranslational modification, protein turnover, chaperones	Molecular Function: hydrolase activity (GO:0016787);;	K06013|2.30329e-76|ppp:PHYPADRAFT_224426|hypothetical protein; K06013 STE24 endopeptidase [EC:3.4.24.84] (A)	ko00900:Terpenoid backbone biosynthesis	[R]	General function prediction only	Peptidase family M48	CAAX prenyl protease 1 homolog OS=Arabidopsis thaliana (Mouse-ear cress) PE=1 SV=1	O	Posttranslational modification, protein turnover, chaperones	predicted protein [Physcomitrella patens]
F01_cb16232_c10/f1p0/1543	[I]	Lipid transport and metabolism	Molecular Function: transferase activity, transferring alkyl or aryl (other than methyl) groups (GO:0016765);;	K11778|2.55782e-128|vvi:100251570|dehydrodolichyl diphosphate synthase 6-like; K11778 ditrans,polycis-polyprenyl diphosphate synthase [EC:2.5.1.87] (A)	ko00900:Terpenoid backbone biosynthesis	[I]	Lipid transport and metabolism	Putative undecaprenyl diphosphate synthase	Dehydrodolichyl diphosphate synthase 6 GN=At2g17570 OS=Arabidopsis thaliana (Mouse-ear cress) PE=2 SV=2	I	Lipid transport and metabolism	PREDICTED: dehydrodolichyl diphosphate synthase 6-like [Sesamum indicum]
F02_cb11607_c5/f1p0/1805	[I]	Lipid transport and metabolism	Molecular Function: isopentenyl-diphosphate delta-isomerase activity (GO:0004452);; Biological Process: isoprenoid biosynthetic process (GO:0008299);; Cellular Component: chloroplast (GO:0009507);; Biological Process: photosynthesis (GO:0015979);; Biological Process: chlorophyll biosynthetic process (GO:0015995);; Molecular Function: hydrolase activity (GO:0016787);; Molecular Function: metal ion…	K01823|1.52473e-151|sot:102580973|isopentenyl-diphosphate Delta-isomerase II-like; K01823 isopentenyl-diphosphate delta-isomerase [EC:5.3.3.2] (A)	ko00900:Terpenoid backbone biosynthesis	[Q]	Secondary metabolites biosynthesis, transport and catabolism	NUDIX domain	Isopentenyl-diphosphate Delta-isomerase II GN=IPI2 OS=Camptotheca acuminata (Happy tree) PE=2 SV=1	I	Lipid transport and metabolism	PREDICTED: isopentenyl-diphosphate Delta-isomerase I [Sesamum indicum]
F01_cb8417_c6/f2p1/2285	[I]	Lipid transport and metabolism	Molecular Function: diphosphomevalonate decarboxylase activity (GO:0004163);; Molecular Function: ATP binding (GO:0005524);; Biological Process: isoprenoid biosynthetic process (GO:0008299);;	K01597|1.58368e-31|fve:101314409|diphosphomevalonate decarboxylase-like; K01597 diphosphomevalonate decarboxylase [EC:4.1.1.33] (A)	ko00900:Terpenoid backbone biosynthesis	[I]	Lipid transport and metabolism	--	--	I	Lipid transport and metabolism	hypothetical protein MIMGU_mgv1a007068mg [Erythranthe guttata]
F01_cb16438_c16381/f2p2/2180	[I]	Lipid transport and metabolism	Molecular Function: hydroxymethylglutaryl-CoA reductase (NADPH) activity (GO:0004420);; Cellular Component: endoplasmic reticulum membrane (GO:0005789);; Biological Process: isoprenoid biosynthetic process (GO:0008299);; Biological Process: coenzyme A metabolic process (GO:0015936);; Cellular Component: integral component of membrane (GO:0016021);; Molecular Function: NADP binding (GO:0050661);; …	K00021|0|vvi:100245191|3-hydroxy-3-methylglutaryl-coenzyme A reductase; K00021 hydroxymethylglutaryl-CoA reductase (NADPH) [EC:1.1.1.34] (A)	ko00900:Terpenoid backbone biosynthesis	[I]	Lipid transport and metabolism	Hydroxymethylglutaryl-coenzyme A reductase	3-hydroxy-3-methylglutaryl-coenzyme A reductase OS=Camptotheca acuminata (Happy tree) PE=3 SV=1	I	Lipid transport and metabolism	HMG CoA reductase [Bacopa monnieri]
F01_cb16438_c37421/f1p0/2340	[IM]	--	Biological Process: isopentenyl diphosphate biosynthetic process, methylerythritol 4-phosphate pathway (GO:0019288);; Biological Process: oxidation-reduction process (GO:0055114);;	K03527|0|vvi:100267479|4-hydroxy-3-methylbut-2-enyl diphosphate reductase, chloroplastic; K03527 4-hydroxy-3-methylbut-2-enyl diphosphate reductase [EC:1.17.1.2] (A)	ko00900:Terpenoid backbone biosynthesis	--	--	LytB protein;; LytB protein	4-hydroxy-3-methylbut-2-enyl diphosphate reductase, chloroplastic (Precursor) GN=F10M10.120 OS=Arabidopsis thaliana (Mouse-ear cress) PE=2 SV=1	I	Lipid transport and metabolism	hypothetical protein MIMGU_mgv1a005937mg [Erythranthe guttata]
F01_cb9579_c4/f1p0/1982	--	--	Molecular Function: prenylcysteine oxidase activity (GO:0001735);; Cellular Component: vacuolar membrane (GO:0005774);; Biological Process: abscisic acid-activated signaling pathway (GO:0009738);; Biological Process: prenylated protein catabolic process (GO:0030327);; Biological Process: prenylcysteine catabolic process (GO:0030328);; Biological Process: hydrogen peroxide catabolic process (GO:00…	K05906|0|cit:102619140|farnesylcysteine lyase-like; K05906 prenylcysteine oxidase / farnesylcysteine lyase [EC:1.8.3.5 1.8.3.6] (A)	ko00900:Terpenoid backbone biosynthesis	--	--	Prenylcysteine lyase;; NAD(P)-binding Rossmann-like domain;; Flavin containing amine oxidoreductase	Farnesylcysteine lyase (Precursor) GN=FLCY OS=Arabidopsis thaliana (Mouse-ear cress) PE=1 SV=1	O	Posttranslational modification, protein turnover, chaperones	PREDICTED: farnesylcysteine lyase [Sesamum indicum]
F02_cb8033_c1/f1p0/1906	[H]	Coenzyme transport and metabolism	Molecular Function: dimethylallyltranstransferase activity (GO:0004161);; Biological Process: isoprenoid biosynthetic process (GO:0008299);; Molecular Function: 2-alkenal reductase [NAD(P)] activity (GO:0032440);; Biological Process: oxidation-reduction process (GO:0055114);;	K13789|3.63888e-145|sly:778310|GGPS1; geranylgeranyl pyrophosphate synthase 1; K13789 geranylgeranyl diphosphate synthase, type II [EC:2.5.1.1 2.5.1.10 2.5.1.29] (A)	ko00900:Terpenoid backbone biosynthesis	[H]	Coenzyme transport and metabolism	Glutathione S-transferase, N-terminal domain	Geranylgeranyl pyrophosphate synthase, chloroplastic (Precursor) GN=GGPS OS=Hevea brasiliensis (Para rubber tree) PE=1 SV=1	H	Coenzyme transport and metabolism	hypothetical protein MIMGU_mgv1a018377mg [Erythranthe guttata]
F01_cb16438_c12766/f1p0/2311	[I]	Lipid transport and metabolism	Molecular Function: hydroxymethylglutaryl-CoA reductase (NADPH) activity (GO:0004420);; Cellular Component: endoplasmic reticulum membrane (GO:0005789);; Biological Process: isoprenoid biosynthetic process (GO:0008299);; Biological Process: coenzyme A metabolic process (GO:0015936);; Cellular Component: integral component of membrane (GO:0016021);; Molecular Function: NADP binding (GO:0050661);; …	K00021|0|sot:102577899|3-hydroxy-3-methylglutaryl coenzyme A reductase; K00021 hydroxymethylglutaryl-CoA reductase (NADPH) [EC:1.1.1.34] (A)	ko00900:Terpenoid backbone biosynthesis	[I]	Lipid transport and metabolism	Hydroxymethylglutaryl-coenzyme A reductase	3-hydroxy-3-methylglutaryl-coenzyme A reductase OS=Camptotheca acuminata (Happy tree) PE=3 SV=1	I	Lipid transport and metabolism	PREDICTED: 3-hydroxy-3-methylglutaryl-coenzyme A reductase [Sesamum indicum]
F01_cb9742_c0/f3p0/1882	[H]	Coenzyme transport and metabolism	Molecular Function: trans-hexaprenyltranstransferase activity (GO:0000010);; Molecular Function: dimethylallyltranstransferase activity (GO:0004161);; Biological Process: ubiquinone biosynthetic process (GO:0006744);; Biological Process: isoprenoid biosynthetic process (GO:0008299);; Cellular Component: chloroplast (GO:0009507);; Biological Process: embryo development (GO:0009790);; Molecular Fun…	K14066|0|sot:102588989|solanesyl diphosphate synthase 3, chloroplastic/mitochondrial-like; K14066 geranyl diphosphate synthase [EC:2.5.1.1] (A)	ko00900:Terpenoid backbone biosynthesis	[H]	Coenzyme transport and metabolism	Polyprenyl synthetase	Solanesyl-diphosphate synthase 1, mitochondrial (Precursor) GN=SPS1 OS=Oryza sativa subsp. japonica (Rice) PE=1 SV=1	H	Coenzyme transport and metabolism	PREDICTED: solanesyl diphosphate synthase 3, chloroplastic/mitochondrial isoform X1 [Sesamum indicum]
F02_cb11041_c37228/f3p0/1516	[I]	Lipid transport and metabolism	Molecular Function: ATP binding (GO:0005524);; Biological Process: heme biosynthetic process (GO:0006783);; Cellular Component: chloroplast (GO:0009507);; Cellular Component: chromoplast (GO:0009509);; Biological Process: response to blue light (GO:0009637);; Biological Process: response to high light intensity (GO:0009644);; Biological Process: response to sucrose (GO:0009744);; Biological Proce…	K00919|0|sot:102601451|4-diphosphocytidyl-2-C-methyl-D-erythritol kinase, chloroplastic/chromoplastic-like; K00919 4-diphosphocytidyl-2-C-methyl-D-erythritol kinase [EC:2.7.1.148] (A)	ko00900:Terpenoid backbone biosynthesis	--	--	GHMP kinases N terminal domain	4-diphosphocytidyl-2-C-methyl-D-erythritol kinase, chloroplastic (Precursor) GN=ISPE OS=Mentha piperita (Peppermint) PE=1 SV=1	I	Lipid transport and metabolism	4-diphosphocytidyl-2-C-methyl-D-erythritol kinase [Salvia miltiorrhiza]
F01_cb8041_c10/f1p0/1904	[I]	Lipid transport and metabolism	Biological Process: maltose metabolic process (GO:0000023);; Biological Process: sulfur amino acid metabolic process (GO:0000096);; Biological Process: pentose-phosphate shunt (GO:0006098);; Biological Process: glycine catabolic process (GO:0006546);; Biological Process: unsaturated fatty acid biosynthetic process (GO:0006636);; Biological Process: phosphatidylglycerol biosynthetic process (GO:00…	K00099|0|sly:543682|DXR; 1-deoxy-D-xylulose-5-phosphate reductoisomerase; K00099 1-deoxy-D-xylulose-5-phosphate reductoisomerase [EC:1.1.1.267] (A)	ko00900:Terpenoid backbone biosynthesis	--	--	1-deoxy-D-xylulose 5-phosphate reductoisomerase;; 1-deoxy-D-xylulose 5-phosphate reductoisomerase C-terminal;; DXP reductoisomerase C-terminal domain	1-deoxy-D-xylulose 5-phosphate reductoisomerase, chloroplastic (Precursor) GN=DXR OS=Mentha piperita (Peppermint) PE=2 SV=2	I	Lipid transport and metabolism	PREDICTED: 1-deoxy-D-xylulose 5-phosphate reductoisomerase, chloroplastic [Sesamum indicum]
F01_cb14174_c0/f2p0/950	[I]	Lipid transport and metabolism	Cellular Component: mitochondrion (GO:0005739);; Molecular Function: 2-C-methyl-D-erythritol 2,4-cyclodiphosphate synthase activity (GO:0008685);; Cellular Component: chloroplast stroma (GO:0009570);; Biological Process: chlorophyll biosynthetic process (GO:0015995);; Biological Process: carotenoid biosynthetic process (GO:0016117);;	K01770|2.06395e-112|sly:101246365|2-C-methyl-D-erythritol 2,4-cyclodiphosphate synthase, chloroplastic; K01770 2-C-methyl-D-erythritol 2,4-cyclodiphosphate synthase [EC:4.6.1.12] (A)	ko00900:Terpenoid backbone biosynthesis	--	--	YgbB family	2-C-methyl-D-erythritol 2,4-cyclodiphosphate synthase, chloroplastic (Precursor) GN=ISPF OS=Catharanthus roseus (Madagascar periwinkle) PE=2 SV=1	I	Lipid transport and metabolism	2-C-methyl-D-erythritol 2,4-cyclodiphosphate synthase [Salvia miltiorrhiza]
F02_cb3805_c4/f1p0/1950	--	--	Molecular Function: catalytic activity (GO:0003824);; Cellular Component: mitochondrion (GO:0005739);; Biological Process: cellular process (GO:0009987);; Biological Process: single-organism process (GO:0044699);;	K05954|5.07939e-61|pop:POPTR_0017s10970g|hypothetical protein; K05954 protein farnesyltransferase subunit beta [EC:2.5.1.58] (A)	ko00900:Terpenoid backbone biosynthesis	[O]	Posttranslational modification, protein turnover, chaperones	Prenyltransferase and squalene oxidase repeat;; Prenyltransferase and squalene oxidase repeat	Protein farnesyltransferase subunit beta GN=FTB OS=Pisum sativum (Garden pea) PE=1 SV=1	O	Posttranslational modification, protein turnover, chaperones	PREDICTED: protein farnesyltransferase subunit beta [Sesamum indicum]
F01_cb11122_c16/f1p0/1770	[H]	Coenzyme transport and metabolism	Molecular Function: dimethylallyltranstransferase activity (GO:0004161);; Biological Process: ubiquinone biosynthetic process (GO:0006744);; Biological Process: isoprenoid biosynthetic process (GO:0008299);; Cellular Component: chloroplast (GO:0009507);; Biological Process: embryo development (GO:0009790);; Molecular Function: trans-octaprenyltranstransferase activity (GO:0050347);;	K14066|0|sot:102588989|solanesyl diphosphate synthase 3, chloroplastic/mitochondrial-like; K14066 geranyl diphosphate synthase [EC:2.5.1.1] (A)	ko00900:Terpenoid backbone biosynthesis	[H]	Coenzyme transport and metabolism	Polyprenyl synthetase	Solanesyl diphosphate synthase 3, chloroplastic/mitochondrial (Precursor) GN=T31E10.3 OS=Arabidopsis thaliana (Mouse-ear cress) PE=1 SV=1	H	Coenzyme transport and metabolism	PREDICTED: solanesyl diphosphate synthase 3, chloroplastic/mitochondrial isoform X1 [Sesamum indicum]
F01_cb16438_c4503/f3p3/2647	[I]	Lipid transport and metabolism	Biological Process: sulfur amino acid metabolic process (GO:0000096);; Biological Process: MAPK cascade (GO:0000165);; Molecular Function: iron ion binding (GO:0005506);; Biological Process: pentose-phosphate shunt (GO:0006098);; Biological Process: regulation of translation (GO:0006417);; Biological Process: glycine catabolic process (GO:0006546);; Biological Process: protein targeting to membra…	K03526|0|mdm:103413028|4-hydroxy-3-methylbut-2-en-1-yl diphosphate synthase, chloroplastic; K03526 (E)-4-hydroxy-3-methylbut-2-enyl-diphosphate synthase [EC:1.17.7.1 1.17.7.3] (A)	ko00900:Terpenoid backbone biosynthesis	--	--	GcpE protein	4-hydroxy-3-methylbut-2-en-1-yl diphosphate synthase, chloroplastic (Precursor) GN=MUP24.2 OS=Arabidopsis thaliana (Mouse-ear cress) PE=1 SV=1	I	Lipid transport and metabolism	(E)-4-hydroxy-3-methylbut-2-enyl diphosphate synthase [Salvia miltiorrhiza f. alba]
F01_cb16438_c14654/f1p1/2279	[I]	Lipid transport and metabolism	Molecular Function: hydroxymethylglutaryl-CoA reductase (NADPH) activity (GO:0004420);; Cellular Component: endoplasmic reticulum membrane (GO:0005789);; Biological Process: isoprenoid biosynthetic process (GO:0008299);; Biological Process: coenzyme A metabolic process (GO:0015936);; Cellular Component: integral component of membrane (GO:0016021);; Molecular Function: NADP binding (GO:0050661);; …	K00021|0|sot:102577899|3-hydroxy-3-methylglutaryl coenzyme A reductase; K00021 hydroxymethylglutaryl-CoA reductase (NADPH) [EC:1.1.1.34] (A)	ko00900:Terpenoid backbone biosynthesis	[I]	Lipid transport and metabolism	Hydroxymethylglutaryl-coenzyme A reductase	3-hydroxy-3-methylglutaryl-coenzyme A reductase OS=Camptotheca acuminata (Happy tree) PE=3 SV=1	I	Lipid transport and metabolism	PREDICTED: 3-hydroxy-3-methylglutaryl-coenzyme A reductase [Sesamum indicum]
F02_cb16732_c1/f1p0/1262	[I]	Lipid transport and metabolism	Cellular Component: membrane (GO:0016020);; Molecular Function: kinase activity (GO:0016301);; Biological Process: phosphorylation (GO:0016310);;	K15892|1.01564e-119|sot:102606110|probable phytol kinase 3, chloroplastic-like; K15892 farnesol kinase [EC:2.7.1.-] (A)	ko00900:Terpenoid backbone biosynthesis	[S]	Function unknown	Cytidylyltransferase family	Probable phytol kinase 3, chloroplastic (Precursor) OS=Glycine max (Soybean) PE=2 SV=1	I	Lipid transport and metabolism	hypothetical protein MIMGU_mgv1a010789mg [Erythranthe guttata]
F01_cb16438_c13026/f1p1/1969	[I]	Lipid transport and metabolism	Molecular Function: hydroxymethylglutaryl-CoA reductase (NADPH) activity (GO:0004420);; Cellular Component: endoplasmic reticulum membrane (GO:0005789);; Biological Process: isoprenoid biosynthetic process (GO:0008299);; Biological Process: coenzyme A metabolic process (GO:0015936);; Cellular Component: integral component of membrane (GO:0016021);; Molecular Function: NADP binding (GO:0050661);; …	K00021|0|sot:102577899|3-hydroxy-3-methylglutaryl coenzyme A reductase; K00021 hydroxymethylglutaryl-CoA reductase (NADPH) [EC:1.1.1.34] (A)	ko00900:Terpenoid backbone biosynthesis	[I]	Lipid transport and metabolism	Hydroxymethylglutaryl-coenzyme A reductase	3-hydroxy-3-methylglutaryl-coenzyme A reductase GN=HMGR OS=Nicotiana sylvestris (Wood tobacco) PE=2 SV=1	I	Lipid transport and metabolism	PREDICTED: 3-hydroxy-3-methylglutaryl-coenzyme A reductase [Sesamum indicum]
F01_cb16438_c17000/f1p0/2253	[I]	Lipid transport and metabolism	Molecular Function: hydroxymethylglutaryl-CoA reductase (NADPH) activity (GO:0004420);; Cellular Component: endoplasmic reticulum membrane (GO:0005789);; Biological Process: isoprenoid biosynthetic process (GO:0008299);; Biological Process: coenzyme A metabolic process (GO:0015936);; Cellular Component: integral component of membrane (GO:0016021);; Molecular Function: NADP binding (GO:0050661);; …	K00021|0|sot:102577899|3-hydroxy-3-methylglutaryl coenzyme A reductase; K00021 hydroxymethylglutaryl-CoA reductase (NADPH) [EC:1.1.1.34] (A)	ko00900:Terpenoid backbone biosynthesis	[I]	Lipid transport and metabolism	Hydroxymethylglutaryl-coenzyme A reductase;; Hydroxymethylglutaryl-coenzyme A reductase	3-hydroxy-3-methylglutaryl-coenzyme A reductase GN=HMGR OS=Nicotiana sylvestris (Wood tobacco) PE=2 SV=1	I	Lipid transport and metabolism	hypothetical protein MIMGU_mgv1a003590mg [Erythranthe guttata]
F02_cb8613_c6/f1p0/2167	[H]	Coenzyme transport and metabolism	Molecular Function: dimethylallyltranstransferase activity (GO:0004161);; Biological Process: ubiquinone biosynthetic process (GO:0006744);; Biological Process: isoprenoid biosynthetic process (GO:0008299);; Cellular Component: chloroplast (GO:0009507);; Biological Process: embryo development (GO:0009790);; Molecular Function: trans-octaprenyltranstransferase activity (GO:0050347);;	K14066|3.83762e-105|pmum:103325208|solanesyl diphosphate synthase 3, chloroplastic/mitochondrial; K14066 geranyl diphosphate synthase [EC:2.5.1.1] (A)	ko00900:Terpenoid backbone biosynthesis	[H]	Coenzyme transport and metabolism	Polyprenyl synthetase;; Polyprenyl synthetase	Solanesyl-diphosphate synthase 1, mitochondrial (Precursor) GN=SPS1 OS=Oryza sativa subsp. japonica (Rice) PE=1 SV=1	H	Coenzyme transport and metabolism	predicted protein [Hordeum vulgare subsp. vulgare]
F02_cb7697_c11/f1p0/1730	[IM]	--	Biological Process: isopentenyl diphosphate biosynthetic process, methylerythritol 4-phosphate pathway (GO:0019288);; Biological Process: oxidation-reduction process (GO:0055114);;	K03527|0|vvi:100267479|4-hydroxy-3-methylbut-2-enyl diphosphate reductase, chloroplastic; K03527 4-hydroxy-3-methylbut-2-enyl diphosphate reductase [EC:1.17.1.2] (A)	ko00900:Terpenoid backbone biosynthesis	--	--	LytB protein	4-hydroxy-3-methylbut-2-enyl diphosphate reductase, chloroplastic (Precursor) GN=F10M10.120 OS=Arabidopsis thaliana (Mouse-ear cress) PE=2 SV=1	I	Lipid transport and metabolism	PREDICTED: 4-hydroxy-3-methylbut-2-enyl diphosphate reductase, chloroplastic [Sesamum indicum]
F01_cb9129_c4/f1p0/1271	[I]	Lipid transport and metabolism	Molecular Function: isopentenyl-diphosphate delta-isomerase activity (GO:0004452);; Biological Process: isoprenoid biosynthetic process (GO:0008299);; Biological Process: photosynthesis (GO:0015979);; Biological Process: chlorophyll biosynthetic process (GO:0015995);; Molecular Function: hydrolase activity (GO:0016787);; Molecular Function: metal ion binding (GO:0046872);; Biological Process: dim…	K01823|1.63866e-161|mdm:103414031|isopentenyl-diphosphate Delta-isomerase I-like; K01823 isopentenyl-diphosphate delta-isomerase [EC:5.3.3.2] (A)	ko00900:Terpenoid backbone biosynthesis	[Q]	Secondary metabolites biosynthesis, transport and catabolism	NUDIX domain	Isopentenyl-diphosphate Delta-isomerase II GN=IPI2 OS=Camptotheca acuminata (Happy tree) PE=2 SV=1	I	Lipid transport and metabolism	isopentenyl pyrophosphate isomerase [Salvia miltiorrhiza]
F01_cb16438_c31965/f3p1/1679	[IM]	--	Biological Process: isopentenyl diphosphate biosynthetic process, methylerythritol 4-phosphate pathway (GO:0019288);; Biological Process: oxidation-reduction process (GO:0055114);;	K03527|0|vvi:100267479|4-hydroxy-3-methylbut-2-enyl diphosphate reductase, chloroplastic; K03527 4-hydroxy-3-methylbut-2-enyl diphosphate reductase [EC:1.17.1.2] (A)	ko00900:Terpenoid backbone biosynthesis	--	--	LytB protein	4-hydroxy-3-methylbut-2-enyl diphosphate reductase, chloroplastic (Precursor) GN=F10M10.120 OS=Arabidopsis thaliana (Mouse-ear cress) PE=2 SV=1	I	Lipid transport and metabolism	PREDICTED: 4-hydroxy-3-methylbut-2-enyl diphosphate reductase, chloroplastic [Sesamum indicum]
F02_cb2495_c13/f1p0/2025	[I]	Lipid transport and metabolism	Molecular Function: transferase activity (GO:0016740);;	K11778|4.12419e-52|vvi:100251570|dehydrodolichyl diphosphate synthase 6-like; K11778 ditrans,polycis-polyprenyl diphosphate synthase [EC:2.5.1.87] (A)	ko00900:Terpenoid backbone biosynthesis	[I]	Lipid transport and metabolism	Putative undecaprenyl diphosphate synthase	Dehydrodolichyl diphosphate synthase 6 GN=At2g17570 OS=Arabidopsis thaliana (Mouse-ear cress) PE=2 SV=2	I	Lipid transport and metabolism	hypothetical protein MIMGU_mgv1a011616mg [Erythranthe guttata]
F01_cb9137_c1/f1p0/1689	--	--	Molecular Function: peptidase activity (GO:0008233);; Biological Process: cellular process (GO:0009987);; Biological Process: protein maturation (GO:0051604);;	K08658|6.7563e-65|vvi:100247667|CAAX prenyl protease 2; K08658 prenyl protein peptidase [EC:3.4.22.-] (A)	ko00900:Terpenoid backbone biosynthesis	[O]	Posttranslational modification, protein turnover, chaperones	CAAX protease self-immunity	CAAX prenyl protease 2 GN=F2H17 OS=Arabidopsis thaliana (Mouse-ear cress) PE=2 SV=2	O	Posttranslational modification, protein turnover, chaperones	PREDICTED: CAAX prenyl protease 2 [Sesamum indicum]
F01_cb8417_c14/f1p0/1967	[I]	Lipid transport and metabolism	Molecular Function: diphosphomevalonate decarboxylase activity (GO:0004163);; Molecular Function: ATP binding (GO:0005524);; Biological Process: isoprenoid biosynthetic process (GO:0008299);; Molecular Function: protein homodimerization activity (GO:0042803);;	K01597|5.71072e-166|vvi:100251686|diphosphomevalonate decarboxylase; K01597 diphosphomevalonate decarboxylase [EC:4.1.1.33] (A)	ko00900:Terpenoid backbone biosynthesis	[I]	Lipid transport and metabolism	GHMP kinases N terminal domain	--	I	Lipid transport and metabolism	mevalonate diphosphate decarboxylase [Salvia miltiorrhiza]
F01_cb3740_c11/f1p0/2114	[I]	Lipid transport and metabolism	Molecular Function: phosphomevalonate kinase activity (GO:0004631);; Molecular Function: ATP binding (GO:0005524);; Biological Process: sterol biosynthetic process (GO:0016126);; Biological Process: phosphorylation (GO:0016310);; Biological Process: pentacyclic triterpenoid biosynthetic process (GO:0019745);;	K00938|0|sly:101256682|probable phosphomevalonate kinase; K00938 phosphomevalonate kinase [EC:2.7.4.2] (A)	ko00900:Terpenoid backbone biosynthesis	[I]	Lipid transport and metabolism	GHMP kinases N terminal domain;; GHMP kinases C terminal	--	I	Lipid transport and metabolism	5-phosphomevalonate kinase [Salvia miltiorrhiza]
F01_cb8168_c0/f3p0/2130	[I]	Lipid transport and metabolism	Molecular Function: hydroxymethylglutaryl-CoA reductase (NADPH) activity (GO:0004420);; Biological Process: isoprenoid biosynthetic process (GO:0008299);; Biological Process: coenzyme A metabolic process (GO:0015936);; Cellular Component: integral component of membrane (GO:0016021);; Molecular Function: NADP binding (GO:0050661);; Biological Process: oxidation-reduction process (GO:0055114);;	K00021|0|pvu:PHAVU_008G208900g|hypothetical protein; K00021 hydroxymethylglutaryl-CoA reductase (NADPH) [EC:1.1.1.34] (A)	ko00900:Terpenoid backbone biosynthesis	[I]	Lipid transport and metabolism	Hydroxymethylglutaryl-coenzyme A reductase	3-hydroxy-3-methylglutaryl-coenzyme A reductase 3 GN=HMG3 OS=Solanum tuberosum (Potato) PE=2 SV=1	I	Lipid transport and metabolism	3-hydroxy-3-methylglutaryl-coenzyme A reductase [Salvia miltiorrhiza]
F02_cb13678_c3/f1p0/1280	[I]	Lipid transport and metabolism	Biological Process: isoprenoid biosynthetic process (GO:0008299);; Molecular Function: nucleotidyltransferase activity (GO:0016779);;	K00991|7.73866e-94|sot:102588399|2-C-methyl-D-erythritol 4-phosphate cytidylyltransferase, chloroplastic-like; K00991 2-C-methyl-D-erythritol 4-phosphate cytidylyltransferase [EC:2.7.7.60] (A)	ko00900:Terpenoid backbone biosynthesis	--	--	2-C-methyl-D-erythritol 4-phosphate cytidylyltransferase	2-C-methyl-D-erythritol 4-phosphate cytidylyltransferase, chloroplastic (Precursor) GN=T8K22.20 OS=Arabidopsis thaliana (Mouse-ear cress) PE=1 SV=1	I	Lipid transport and metabolism	hypothetical protein MIMGU_mgv1a010477mg [Erythranthe guttata]
F02_cb11041_c45267/f1p1/1866	[I]	Lipid transport and metabolism	Molecular Function: hydroxymethylglutaryl-CoA reductase (NADPH) activity (GO:0004420);; Cellular Component: endoplasmic reticulum membrane (GO:0005789);; Biological Process: isoprenoid biosynthetic process (GO:0008299);; Biological Process: coenzyme A metabolic process (GO:0015936);; Cellular Component: integral component of membrane (GO:0016021);; Molecular Function: NADP binding (GO:0050661);; …	K00021|0|sot:102577899|3-hydroxy-3-methylglutaryl coenzyme A reductase; K00021 hydroxymethylglutaryl-CoA reductase (NADPH) [EC:1.1.1.34] (A)	ko00900:Terpenoid backbone biosynthesis	[I]	Lipid transport and metabolism	Hydroxymethylglutaryl-coenzyme A reductase	3-hydroxy-3-methylglutaryl-coenzyme A reductase GN=HMGR OS=Nicotiana sylvestris (Wood tobacco) PE=2 SV=1	I	Lipid transport and metabolism	hypothetical protein MIMGU_mgv1a003590mg [Erythranthe guttata]
F02_cb18531_c2/f1p0/576	[I]	Lipid transport and metabolism	Cellular Component: mitochondrion (GO:0005739);; Molecular Function: 2-C-methyl-D-erythritol 2,4-cyclodiphosphate synthase activity (GO:0008685);; Cellular Component: chloroplast stroma (GO:0009570);; Biological Process: chlorophyll biosynthetic process (GO:0015995);; Biological Process: carotenoid biosynthetic process (GO:0016117);;	K01770|1.49841e-63|sly:101246365|2-C-methyl-D-erythritol 2,4-cyclodiphosphate synthase, chloroplastic; K01770 2-C-methyl-D-erythritol 2,4-cyclodiphosphate synthase [EC:4.6.1.12] (A)	ko00900:Terpenoid backbone biosynthesis	--	--	YgbB family;; YgbB family	2-C-methyl-D-erythritol 2,4-cyclodiphosphate synthase, chloroplastic (Precursor) GN=ISPF OS=Catharanthus roseus (Madagascar periwinkle) PE=2 SV=1	I	Lipid transport and metabolism	PREDICTED: 2-C-methyl-D-erythritol 2,4-cyclodiphosphate synthase, chloroplastic-like [Sesamum indicum]
F02_cb2495_c14/f1p0/2361	[I]	Lipid transport and metabolism	Molecular Function: transferase activity, transferring alkyl or aryl (other than methyl) groups (GO:0016765);;	K11778|1.76242e-46|vvi:100251570|dehydrodolichyl diphosphate synthase 6-like; K11778 ditrans,polycis-polyprenyl diphosphate synthase [EC:2.5.1.87] (A)	ko00900:Terpenoid backbone biosynthesis	[I]	Lipid transport and metabolism	Putative undecaprenyl diphosphate synthase	Dehydrodolichyl diphosphate synthase 6 GN=At2g17570 OS=Arabidopsis thaliana (Mouse-ear cress) PE=2 SV=2	I	Lipid transport and metabolism	hypothetical protein MIMGU_mgv1a011616mg [Erythranthe guttata]
F01_cb16438_c16782/f1p0/2489	[I]	Lipid transport and metabolism	Molecular Function: hydroxymethylglutaryl-CoA reductase (NADPH) activity (GO:0004420);; Cellular Component: endoplasmic reticulum membrane (GO:0005789);; Biological Process: isoprenoid biosynthetic process (GO:0008299);; Biological Process: coenzyme A metabolic process (GO:0015936);; Cellular Component: integral component of membrane (GO:0016021);; Molecular Function: NADP binding (GO:0050661);; …	K00021|0|sot:102599791|hmg1; 3-hydroxy-3-methylglutaryl-coenzyme A reductase 1-like; K00021 hydroxymethylglutaryl-CoA reductase (NADPH) [EC:1.1.1.34] (A)	ko00900:Terpenoid backbone biosynthesis	[I]	Lipid transport and metabolism	Hydroxymethylglutaryl-coenzyme A reductase	3-hydroxy-3-methylglutaryl-coenzyme A reductase OS=Camptotheca acuminata (Happy tree) PE=3 SV=1	I	Lipid transport and metabolism	PREDICTED: 3-hydroxy-3-methylglutaryl-coenzyme A reductase [Sesamum indicum]
F01_cb9071_c17/f7p1/1208	[I]	Lipid transport and metabolism	Molecular Function: isopentenyl-diphosphate delta-isomerase activity (GO:0004452);; Biological Process: isoprenoid biosynthetic process (GO:0008299);; Molecular Function: hydrolase activity (GO:0016787);;	K01823|2.38666e-158|sot:102580973|isopentenyl-diphosphate Delta-isomerase II-like; K01823 isopentenyl-diphosphate delta-isomerase [EC:5.3.3.2] (A)	ko00900:Terpenoid backbone biosynthesis	[Q]	Secondary metabolites biosynthesis, transport and catabolism	NUDIX domain	Isopentenyl-diphosphate Delta-isomerase II GN=IPI2 OS=Camptotheca acuminata (Happy tree) PE=2 SV=1	I	Lipid transport and metabolism	PREDICTED: isopentenyl-diphosphate Delta-isomerase II-like [Solanum tuberosum]
F01_cb4189_c7/f1p0/4334	[H]	Coenzyme transport and metabolism	Molecular Function: dimethylallyltranstransferase activity (GO:0004161);; Biological Process: isoprenoid biosynthetic process (GO:0008299);;	K00787|8.92684e-53|tcc:TCM_030459|Farnesyl diphosphate synthase 1 isoform 1; K00787 farnesyl diphosphate synthase [EC:2.5.1.1 2.5.1.10] (A)	ko00900:Terpenoid backbone biosynthesis	[H]	Coenzyme transport and metabolism	Polyprenyl synthetase	Farnesyl pyrophosphate synthase 1 GN=FPS1 OS=Lupinus albus (White lupin) PE=2 SV=1	H	Coenzyme transport and metabolism	farnesyl diphosphate synthase, partial [Plectranthus barbatus]
F02_cb11041_c104089/f92p8/2590	[I]	Lipid transport and metabolism	Molecular Function: iron ion binding (GO:0005506);; Biological Process: terpenoid biosynthetic process (GO:0016114);; Molecular Function: 4-hydroxy-3-methylbut-2-en-1-yl diphosphate synthase activity (GO:0046429);; Biological Process: oxidation-reduction process (GO:0055114);;	K03526|0|mdm:103422909|4-hydroxy-3-methylbut-2-en-1-yl diphosphate synthase, chloroplastic; K03526 (E)-4-hydroxy-3-methylbut-2-enyl-diphosphate synthase [EC:1.17.7.1 1.17.7.3] (A)	ko00900:Terpenoid backbone biosynthesis	--	--	GcpE protein;; GcpE protein	4-hydroxy-3-methylbut-2-en-1-yl diphosphate synthase, chloroplastic (Precursor) GN=MUP24.2 OS=Arabidopsis thaliana (Mouse-ear cress) PE=1 SV=1	I	Lipid transport and metabolism	(E)-4-hydroxy-3-methylbut-2-enyl diphosphate synthase [Salvia miltiorrhiza f. alba]
F01_cb4189_c3/f2p0/3009	[H]	Coenzyme transport and metabolism	Molecular Function: dimethylallyltranstransferase activity (GO:0004161);; Molecular Function: geranyltranstransferase activity (GO:0004337);; Biological Process: isoprenoid biosynthetic process (GO:0008299);;	K00787|2.33544e-144|pop:POPTR_0006s00530g|POPTRDRAFT_560081; farnesyl-pyrophosphate synthetase fps2 family protein; K00787 farnesyl diphosphate synthase [EC:2.5.1.1 2.5.1.10] (A)	ko00900:Terpenoid backbone biosynthesis	[H]	Coenzyme transport and metabolism	Polyprenyl synthetase;; Polyprenyl synthetase	Farnesyl pyrophosphate synthase 1 GN=FPS1 OS=Lupinus albus (White lupin) PE=2 SV=1	H	Coenzyme transport and metabolism	farnesyl diphosphate synthase [Mentha x piperita]
F01_cb16438_c35613/f1p0/2364	[I]	Lipid transport and metabolism	Molecular Function: hydroxymethylglutaryl-CoA reductase (NADPH) activity (GO:0004420);; Cellular Component: endoplasmic reticulum membrane (GO:0005789);; Biological Process: isoprenoid biosynthetic process (GO:0008299);; Biological Process: coenzyme A metabolic process (GO:0015936);; Cellular Component: integral component of membrane (GO:0016021);; Molecular Function: NADP binding (GO:0050661);; …	K00021|0|sot:102577899|3-hydroxy-3-methylglutaryl coenzyme A reductase; K00021 hydroxymethylglutaryl-CoA reductase (NADPH) [EC:1.1.1.34] (A)	ko00900:Terpenoid backbone biosynthesis	[I]	Lipid transport and metabolism	Hydroxymethylglutaryl-coenzyme A reductase	3-hydroxy-3-methylglutaryl-coenzyme A reductase OS=Camptotheca acuminata (Happy tree) PE=3 SV=1	I	Lipid transport and metabolism	PREDICTED: 3-hydroxy-3-methylglutaryl-coenzyme A reductase [Sesamum indicum]
F01_cb8041_c13/f1p0/2260	[I]	Lipid transport and metabolism	Cellular Component: chloroplast (GO:0009507);; Molecular Function: isomerase activity (GO:0016853);; Biological Process: isopentenyl diphosphate biosynthetic process, methylerythritol 4-phosphate pathway (GO:0019288);; Molecular Function: 1-deoxy-D-xylulose-5-phosphate reductoisomerase activity (GO:0030604);; Molecular Function: metal ion binding (GO:0046872);; Biological Process: oxidation-reduc…	K00099|1.85993e-153|mdm:103455221|1-deoxy-D-xylulose 5-phosphate reductoisomerase, chloroplastic-like; K00099 1-deoxy-D-xylulose-5-phosphate reductoisomerase [EC:1.1.1.267] (A)	ko00900:Terpenoid backbone biosynthesis	--	--	DXP reductoisomerase C-terminal domain;; 1-deoxy-D-xylulose 5-phosphate reductoisomerase C-terminal;; DXP reductoisomerase C-terminal domain	1-deoxy-D-xylulose 5-phosphate reductoisomerase, chloroplastic (Precursor) GN=DXR OS=Mentha piperita (Peppermint) PE=2 SV=2	I	Lipid transport and metabolism	1-deoxy-D-xylulose 5-phosphate reductoisomerase [Lavandula angustifolia]
F01_cb3740_c9/f1p1/1714	[I]	Lipid transport and metabolism	Molecular Function: phosphomevalonate kinase activity (GO:0004631);; Molecular Function: ATP binding (GO:0005524);; Biological Process: sterol biosynthetic process (GO:0016126);; Biological Process: phosphorylation (GO:0016310);; Biological Process: pentacyclic triterpenoid biosynthetic process (GO:0019745);;	K00938|1.26033e-137|sot:102593814|phosphomevalonate kinase-like; K00938 phosphomevalonate kinase [EC:2.7.4.2] (A)	ko00900:Terpenoid backbone biosynthesis	[I]	Lipid transport and metabolism	GHMP kinases N terminal domain;; GHMP kinases C terminal	--	I	Lipid transport and metabolism	hypothetical protein Csa_3G895920 [Cucumis sativus]
F01_cb17128_c3/f1p0/937	[O]	Posttranslational modification, protein turnover, chaperones	Molecular Function: protein C-terminal S-isoprenylcysteine carboxyl O-methyltransferase activity (GO:0004671);; Cellular Component: endoplasmic reticulum (GO:0005783);; Biological Process: C-terminal protein methylation (GO:0006481);; Cellular Component: integral component of membrane (GO:0016021);;	K00587|7.9808e-105|rcu:RCOM_0037200|protein-s isoprenylcysteine O-methyltransferase, putative (EC:2.1.1.100); K00587 protein-S-isoprenylcysteine O-methyltransferase [EC:2.1.1.100] (A)	ko00900:Terpenoid backbone biosynthesis	[O]	Posttranslational modification, protein turnover, chaperones	Isoprenylcysteine carboxyl methyltransferase (ICMT) family;; Phospholipid methyltransferase	Protein-S-isoprenylcysteine O-methyltransferase B GN=F8L15.70 OS=Arabidopsis thaliana (Mouse-ear cress) PE=1 SV=1	O	Posttranslational modification, protein turnover, chaperones	PREDICTED: protein-S-isoprenylcysteine O-methyltransferase A isoform X2 [Sesamum indicum]
F01_cb16438_c35949/f1p0/2137	[I]	Lipid transport and metabolism	Molecular Function: transferase activity (GO:0016740);;	K11778|3.72905e-121|vvi:100251570|dehydrodolichyl diphosphate synthase 6-like; K11778 ditrans,polycis-polyprenyl diphosphate synthase [EC:2.5.1.87] (A)	ko00900:Terpenoid backbone biosynthesis	[I]	Lipid transport and metabolism	Putative undecaprenyl diphosphate synthase	Dehydrodolichyl diphosphate synthase 6 GN=At2g17570 OS=Arabidopsis thaliana (Mouse-ear cress) PE=2 SV=2	I	Lipid transport and metabolism	PREDICTED: dehydrodolichyl diphosphate synthase 6-like [Sesamum indicum]
F01_cb4189_c6/f1p0/4278	[H]	Coenzyme transport and metabolism	Molecular Function: dimethylallyltranstransferase activity (GO:0004161);; Biological Process: isoprenoid biosynthetic process (GO:0008299);;	K00787|2.95843e-57|cmo:103501295|farnesyl pyrophosphate synthase 1; K00787 farnesyl diphosphate synthase [EC:2.5.1.1 2.5.1.10] (A)	ko00900:Terpenoid backbone biosynthesis	[H]	Coenzyme transport and metabolism	Polyprenyl synthetase;; Polyprenyl synthetase	Farnesyl pyrophosphate synthase 1 GN=FPS1 OS=Lupinus albus (White lupin) PE=2 SV=1	H	Coenzyme transport and metabolism	farnesyl diphosphate synthase, partial [Plectranthus barbatus]
F01_cb16232_c4/f1p0/1499	[I]	Lipid transport and metabolism	Molecular Function: transferase activity, transferring alkyl or aryl (other than methyl) groups (GO:0016765);;	K11778|9.90541e-136|vvi:100251570|dehydrodolichyl diphosphate synthase 6-like; K11778 ditrans,polycis-polyprenyl diphosphate synthase [EC:2.5.1.87] (A)	ko00900:Terpenoid backbone biosynthesis	[I]	Lipid transport and metabolism	Putative undecaprenyl diphosphate synthase	Dehydrodolichyl diphosphate synthase 6 GN=At2g17570 OS=Arabidopsis thaliana (Mouse-ear cress) PE=2 SV=2	I	Lipid transport and metabolism	PREDICTED: dehydrodolichyl diphosphate synthase 6-like [Sesamum indicum]
F01_cb8278_c1/f2p0/930	[I]	Lipid transport and metabolism	Cellular Component: membrane (GO:0016020);; Molecular Function: kinase activity (GO:0016301);; Biological Process: phosphorylation (GO:0016310);;	K15892|2.90582e-119|sot:102606110|probable phytol kinase 3, chloroplastic-like; K15892 farnesol kinase [EC:2.7.1.-] (A)	ko00900:Terpenoid backbone biosynthesis	[S]	Function unknown	Cytidylyltransferase family	Probable phytol kinase 3, chloroplastic (Precursor) OS=Glycine max (Soybean) PE=2 SV=1	I	Lipid transport and metabolism	hypothetical protein MIMGU_mgv1a010789mg [Erythranthe guttata]
F01_cb9742_c4/f1p0/1633	[H]	Coenzyme transport and metabolism	Molecular Function: trans-hexaprenyltranstransferase activity (GO:0000010);; Molecular Function: dimethylallyltranstransferase activity (GO:0004161);; Biological Process: isoprenoid biosynthetic process (GO:0008299);;	K14066|0|rcu:RCOM_0747390|geranylgeranyl pyrophosphate synthase, putative (EC:2.5.1.30); K14066 geranyl diphosphate synthase [EC:2.5.1.1] (A)	ko00900:Terpenoid backbone biosynthesis	[H]	Coenzyme transport and metabolism	Polyprenyl synthetase	Solanesyl-diphosphate synthase 1, mitochondrial (Precursor) GN=SPS1 OS=Oryza sativa subsp. japonica (Rice) PE=1 SV=1	H	Coenzyme transport and metabolism	PREDICTED: solanesyl diphosphate synthase 3, chloroplastic/mitochondrial isoform X1 [Sesamum indicum]
F02_cb13041_c0/f1p0/1487	[H]	Coenzyme transport and metabolism	Molecular Function: dimethylallyltranstransferase activity (GO:0004161);; Molecular Function: geranyltranstransferase activity (GO:0004337);; Biological Process: isoprenoid biosynthetic process (GO:0008299);;	K00787|3.0735e-168|cam:101497550|farnesyl pyrophosphate synthase 1-like; K00787 farnesyl diphosphate synthase [EC:2.5.1.1 2.5.1.10] (A)	ko00900:Terpenoid backbone biosynthesis	[H]	Coenzyme transport and metabolism	Polyprenyl synthetase;; Polyprenyl synthetase	Farnesyl pyrophosphate synthase 1 GN=FPS1 OS=Lupinus albus (White lupin) PE=2 SV=1	H	Coenzyme transport and metabolism	PREDICTED: farnesyl pyrophosphate synthase 1-like [Beta vulgaris subsp. vulgaris]
F02_cb11041_c72939/f4p0/2241	[I]	Lipid transport and metabolism	Molecular Function: hydroxymethylglutaryl-CoA reductase (NADPH) activity (GO:0004420);; Cellular Component: endoplasmic reticulum membrane (GO:0005789);; Biological Process: isoprenoid biosynthetic process (GO:0008299);; Biological Process: coenzyme A metabolic process (GO:0015936);; Cellular Component: integral component of membrane (GO:0016021);; Molecular Function: NADP binding (GO:0050661);; …	K00021|0|sot:102599791|hmg1; 3-hydroxy-3-methylglutaryl-coenzyme A reductase 1-like; K00021 hydroxymethylglutaryl-CoA reductase (NADPH) [EC:1.1.1.34] (A)	ko00900:Terpenoid backbone biosynthesis	[I]	Lipid transport and metabolism	Hydroxymethylglutaryl-coenzyme A reductase;; Hydroxymethylglutaryl-coenzyme A reductase	3-hydroxy-3-methylglutaryl-coenzyme A reductase OS=Camptotheca acuminata (Happy tree) PE=3 SV=1	I	Lipid transport and metabolism	hypothetical protein MIMGU_mgv1a003590mg [Erythranthe guttata]
F02_cb7697_c35/f2p1/2237	[IM]	--	Biological Process: isopentenyl diphosphate biosynthetic process, methylerythritol 4-phosphate pathway (GO:0019288);; Molecular Function: 4-hydroxy-3-methylbut-2-en-1-yl diphosphate reductase activity (GO:0051745);; Biological Process: oxidation-reduction process (GO:0055114);;	K03527|1.08272e-177|vvi:100267479|4-hydroxy-3-methylbut-2-enyl diphosphate reductase, chloroplastic; K03527 4-hydroxy-3-methylbut-2-enyl diphosphate reductase [EC:1.17.1.2] (A)	ko00900:Terpenoid backbone biosynthesis	--	--	LytB protein;; LytB protein	4-hydroxy-3-methylbut-2-enyl diphosphate reductase, chloroplastic (Precursor) GN=OSJNBa0079G12.18 OS=Oryza sativa subsp. japonica (Rice) PE=2 SV=1	I	Lipid transport and metabolism	PREDICTED: 4-hydroxy-3-methylbut-2-enyl diphosphate reductase, chloroplastic [Sesamum indicum]
F01_cb13703_c10/f5p0/1257	--	--	Biological Process: cellular process (GO:0009987);; Biological Process: response to stimulus (GO:0050896);;	K11778|3.83088e-90|sot:102596985|nogo-B receptor-like; K11778 ditrans,polycis-polyprenyl diphosphate synthase [EC:2.5.1.87] (A)	ko00900:Terpenoid backbone biosynthesis	--	--	--	--	S	Function unknown	PREDICTED: dehydrodolichyl diphosphate syntase complex subunit nus1-like [Sesamum indicum]
F01_cb14174_c4/f1p0/879	[I]	Lipid transport and metabolism	Cellular Component: mitochondrion (GO:0005739);; Molecular Function: 2-C-methyl-D-erythritol 2,4-cyclodiphosphate synthase activity (GO:0008685);; Cellular Component: chloroplast stroma (GO:0009570);; Biological Process: chlorophyll biosynthetic process (GO:0015995);; Biological Process: carotenoid biosynthetic process (GO:0016117);;	K01770|3.75459e-113|sly:101246365|2-C-methyl-D-erythritol 2,4-cyclodiphosphate synthase, chloroplastic; K01770 2-C-methyl-D-erythritol 2,4-cyclodiphosphate synthase [EC:4.6.1.12] (A)	ko00900:Terpenoid backbone biosynthesis	--	--	YgbB family	2-C-methyl-D-erythritol 2,4-cyclodiphosphate synthase, chloroplastic (Precursor) GN=ISPF OS=Catharanthus roseus (Madagascar periwinkle) PE=2 SV=1	I	Lipid transport and metabolism	2-C-methyl-D-erythritol 2,4-cyclodiphosphate synthase [Salvia miltiorrhiza]
F02_cb13678_c2/f1p0/1317	[I]	Lipid transport and metabolism	Biological Process: sulfur amino acid metabolic process (GO:0000096);; Biological Process: glycine catabolic process (GO:0006546);; Biological Process: unsaturated fatty acid biosynthetic process (GO:0006636);; Biological Process: oxidoreduction coenzyme metabolic process (GO:0006733);; Biological Process: vitamin metabolic process (GO:0006766);; Biological Process: cellular amino acid biosynthet…	K00991|1.4343e-140|cit:102612633|2-C-methyl-D-erythritol 4-phosphate cytidylyltransferase, chloroplastic-like; K00991 2-C-methyl-D-erythritol 4-phosphate cytidylyltransferase [EC:2.7.7.60] (A)	ko00900:Terpenoid backbone biosynthesis	--	--	2-C-methyl-D-erythritol 4-phosphate cytidylyltransferase;; MobA-like NTP transferase domain	2-C-methyl-D-erythritol 4-phosphate cytidylyltransferase, chloroplastic (Precursor) GN=T8K22.20 OS=Arabidopsis thaliana (Mouse-ear cress) PE=1 SV=1	I	Lipid transport and metabolism	PREDICTED: 2-C-methyl-D-erythritol 4-phosphate cytidylyltransferase, chloroplastic isoform X2 [Sesamum indicum]
F01_cb16438_c8149/f3p0/2168	[I]	Lipid transport and metabolism	Molecular Function: hydroxymethylglutaryl-CoA reductase (NADPH) activity (GO:0004420);; Cellular Component: endoplasmic reticulum membrane (GO:0005789);; Biological Process: isoprenoid biosynthetic process (GO:0008299);; Biological Process: coenzyme A metabolic process (GO:0015936);; Cellular Component: integral component of membrane (GO:0016021);; Molecular Function: NADP binding (GO:0050661);; …	K00021|0|sot:102577899|3-hydroxy-3-methylglutaryl coenzyme A reductase; K00021 hydroxymethylglutaryl-CoA reductase (NADPH) [EC:1.1.1.34] (A)	ko00900:Terpenoid backbone biosynthesis	[I]	Lipid transport and metabolism	Hydroxymethylglutaryl-coenzyme A reductase;; Hydroxymethylglutaryl-coenzyme A reductase;; Hydroxymethylglutaryl-coenzyme A reductase	3-hydroxy-3-methylglutaryl-coenzyme A reductase OS=Camptotheca acuminata (Happy tree) PE=3 SV=1	I	Lipid transport and metabolism	hypothetical protein MIMGU_mgv1a003590mg [Erythranthe guttata]
F01_cb16438_c15179/f1p0/2166	[I]	Lipid transport and metabolism	Molecular Function: hydroxymethylglutaryl-CoA reductase (NADPH) activity (GO:0004420);; Cellular Component: endoplasmic reticulum membrane (GO:0005789);; Biological Process: isoprenoid biosynthetic process (GO:0008299);; Biological Process: coenzyme A metabolic process (GO:0015936);; Cellular Component: integral component of membrane (GO:0016021);; Molecular Function: NADP binding (GO:0050661);; …	K00021|0|sot:102577899|3-hydroxy-3-methylglutaryl coenzyme A reductase; K00021 hydroxymethylglutaryl-CoA reductase (NADPH) [EC:1.1.1.34] (A)	ko00900:Terpenoid backbone biosynthesis	[I]	Lipid transport and metabolism	Hydroxymethylglutaryl-coenzyme A reductase	3-hydroxy-3-methylglutaryl-coenzyme A reductase OS=Camptotheca acuminata (Happy tree) PE=3 SV=1	I	Lipid transport and metabolism	hypothetical protein MIMGU_mgv1a003590mg [Erythranthe guttata]
F01_cb16438_c17368/f1p0/2167	[I]	Lipid transport and metabolism	Molecular Function: hydroxymethylglutaryl-CoA reductase (NADPH) activity (GO:0004420);; Cellular Component: endoplasmic reticulum membrane (GO:0005789);; Biological Process: isoprenoid biosynthetic process (GO:0008299);; Biological Process: coenzyme A metabolic process (GO:0015936);; Cellular Component: integral component of membrane (GO:0016021);; Molecular Function: NADP binding (GO:0050661);; …	K00021|0|sot:102577899|3-hydroxy-3-methylglutaryl coenzyme A reductase; K00021 hydroxymethylglutaryl-CoA reductase (NADPH) [EC:1.1.1.34] (A)	ko00900:Terpenoid backbone biosynthesis	[I]	Lipid transport and metabolism	Hydroxymethylglutaryl-coenzyme A reductase	3-hydroxy-3-methylglutaryl-coenzyme A reductase OS=Camptotheca acuminata (Happy tree) PE=3 SV=1	I	Lipid transport and metabolism	hypothetical protein MIMGU_mgv1a003590mg [Erythranthe guttata]
F01_cb16438_c4586/f1p1/2174	[I]	Lipid transport and metabolism	Biological Process: sulfur amino acid metabolic process (GO:0000096);; Biological Process: MAPK cascade (GO:0000165);; Molecular Function: iron ion binding (GO:0005506);; Biological Process: pentose-phosphate shunt (GO:0006098);; Biological Process: regulation of translation (GO:0006417);; Biological Process: glycine catabolic process (GO:0006546);; Biological Process: protein targeting to membra…	K03526|2.06709e-136|gmx:100801743|4-hydroxy-3-methylbut-2-en-1-yl diphosphate synthase, chloroplastic-like; K03526 (E)-4-hydroxy-3-methylbut-2-enyl-diphosphate synthase [EC:1.17.7.1 1.17.7.3] (A)	ko00900:Terpenoid backbone biosynthesis	--	--	GcpE protein;; GcpE protein	4-hydroxy-3-methylbut-2-en-1-yl diphosphate synthase, chloroplastic (Precursor) OS=Oryza sativa subsp. japonica (Rice) PE=2 SV=1	I	Lipid transport and metabolism	PREDICTED: 4-hydroxy-3-methylbut-2-en-1-yl diphosphate synthase, chloroplastic [Sesamum indicum]
F01_cb9071_c16/f1p0/1449	[I]	Lipid transport and metabolism	Molecular Function: isopentenyl-diphosphate delta-isomerase activity (GO:0004452);; Biological Process: isoprenoid biosynthetic process (GO:0008299);; Molecular Function: hydrolase activity (GO:0016787);;	K01823|1.14528e-157|sot:102580973|isopentenyl-diphosphate Delta-isomerase II-like; K01823 isopentenyl-diphosphate delta-isomerase [EC:5.3.3.2] (A)	ko00900:Terpenoid backbone biosynthesis	[Q]	Secondary metabolites biosynthesis, transport and catabolism	NUDIX domain	Isopentenyl-diphosphate Delta-isomerase II GN=IPI2 OS=Camptotheca acuminata (Happy tree) PE=2 SV=1	I	Lipid transport and metabolism	PREDICTED: isopentenyl-diphosphate Delta-isomerase II-like [Solanum tuberosum]
F02_cb8613_c11/f1p0/1777	[H]	Coenzyme transport and metabolism	Molecular Function: trans-hexaprenyltranstransferase activity (GO:0000010);; Molecular Function: dimethylallyltranstransferase activity (GO:0004161);; Biological Process: isoprenoid biosynthetic process (GO:0008299);;	K14066|2.36462e-149|pper:PRUPE_ppa006211mg|hypothetical protein; K14066 geranyl diphosphate synthase [EC:2.5.1.1] (A)	ko00900:Terpenoid backbone biosynthesis	[H]	Coenzyme transport and metabolism	Polyprenyl synthetase	Solanesyl-diphosphate synthase 1, mitochondrial (Precursor) GN=SPS1 OS=Oryza sativa subsp. japonica (Rice) PE=1 SV=1	H	Coenzyme transport and metabolism	PREDICTED: solanesyl diphosphate synthase 3, chloroplastic/mitochondrial isoform X1 [Sesamum indicum]
F02_cb9372_c2/f1p0/2097	[H]	Coenzyme transport and metabolism	Molecular Function: trans-hexaprenyltranstransferase activity (GO:0000010);; Biological Process: isoprenoid biosynthetic process (GO:0008299);; Biological Process: photosynthesis (GO:0015979);;	K05356|0|rcu:RCOM_1182760|solanesyl diphosphate synthase, putative (EC:2.5.1.30); K05356 all-trans-nonaprenyl-diphosphate synthase [EC:2.5.1.84 2.5.1.85] (A)	ko00900:Terpenoid backbone biosynthesis	[H]	Coenzyme transport and metabolism	Polyprenyl synthetase	Solanesyl diphosphate synthase 1 GN=T30F21.15 OS=Arabidopsis thaliana (Mouse-ear cress) PE=1 SV=1	H	Coenzyme transport and metabolism	PREDICTED: probable solanesyl-diphosphate synthase 3, chloroplastic isoform X2 [Sesamum indicum]
F02_cb2495_c22/f1p0/1729	[I]	Lipid transport and metabolism	Molecular Function: transferase activity, transferring alkyl or aryl (other than methyl) groups (GO:0016765);;	K11778|5.43202e-135|vvi:100251570|dehydrodolichyl diphosphate synthase 6-like; K11778 ditrans,polycis-polyprenyl diphosphate synthase [EC:2.5.1.87] (A)	ko00900:Terpenoid backbone biosynthesis	[I]	Lipid transport and metabolism	Putative undecaprenyl diphosphate synthase	Dehydrodolichyl diphosphate synthase 6 GN=At2g17570 OS=Arabidopsis thaliana (Mouse-ear cress) PE=2 SV=2	I	Lipid transport and metabolism	PREDICTED: dehydrodolichyl diphosphate synthase 6-like [Sesamum indicum]
F01_cb17128_c2/f1p0/1073	[O]	Posttranslational modification, protein turnover, chaperones	Molecular Function: protein C-terminal S-isoprenylcysteine carboxyl O-methyltransferase activity (GO:0004671);; Cellular Component: endoplasmic reticulum (GO:0005783);; Biological Process: C-terminal protein methylation (GO:0006481);; Cellular Component: integral component of membrane (GO:0016021);;	K00587|3.62056e-103|rcu:RCOM_0037200|protein-s isoprenylcysteine O-methyltransferase, putative (EC:2.1.1.100); K00587 protein-S-isoprenylcysteine O-methyltransferase [EC:2.1.1.100] (A)	ko00900:Terpenoid backbone biosynthesis	[O]	Posttranslational modification, protein turnover, chaperones	Isoprenylcysteine carboxyl methyltransferase (ICMT) family;; Phospholipid methyltransferase	Protein-S-isoprenylcysteine O-methyltransferase B GN=F8L15.70 OS=Arabidopsis thaliana (Mouse-ear cress) PE=1 SV=1	O	Posttranslational modification, protein turnover, chaperones	PREDICTED: protein-S-isoprenylcysteine O-methyltransferase A isoform X2 [Sesamum indicum]
F01_cb9887_c4/f1p1/1833	[H]	Coenzyme transport and metabolism	Molecular Function: trans-hexaprenyltranstransferase activity (GO:0000010);; Biological Process: isoprenoid biosynthetic process (GO:0008299);; Biological Process: photosynthesis (GO:0015979);;	K05356|1.69863e-139|sot:102593674|solanesyl diphosphate synthase 1-like; K05356 all-trans-nonaprenyl-diphosphate synthase [EC:2.5.1.84 2.5.1.85] (A)	ko00900:Terpenoid backbone biosynthesis	[H]	Coenzyme transport and metabolism	Polyprenyl synthetase;; Polyprenyl synthetase	Solanesyl diphosphate synthase 2, chloroplastic (Precursor) GN=F20D23.25 OS=Arabidopsis thaliana (Mouse-ear cress) PE=1 SV=1	H	Coenzyme transport and metabolism	PREDICTED: probable solanesyl-diphosphate synthase 3, chloroplastic isoform X2 [Sesamum indicum]
F01_cb16438_c39188/f1p0/4252	[IM]	--	Biological Process: isopentenyl diphosphate biosynthetic process, methylerythritol 4-phosphate pathway (GO:0019288);; Biological Process: oxidation-reduction process (GO:0055114);;	K03527|0|vvi:100267479|4-hydroxy-3-methylbut-2-enyl diphosphate reductase, chloroplastic; K03527 4-hydroxy-3-methylbut-2-enyl diphosphate reductase [EC:1.17.1.2] (A)	ko00900:Terpenoid backbone biosynthesis	--	--	LytB protein;; LytB protein	4-hydroxy-3-methylbut-2-enyl diphosphate reductase, chloroplastic (Precursor) GN=OSJNBa0079G12.18 OS=Oryza sativa subsp. japonica (Rice) PE=2 SV=1	I	Lipid transport and metabolism	PREDICTED: 4-hydroxy-3-methylbut-2-enyl diphosphate reductase, chloroplastic [Sesamum indicum]
F02_cb7697_c31/f12p2/1727	[IM]	--	Biological Process: isopentenyl diphosphate biosynthetic process, methylerythritol 4-phosphate pathway (GO:0019288);; Biological Process: oxidation-reduction process (GO:0055114);;	K03527|3.66268e-129|mpp:MICPUCDRAFT_26764|hypothetical protein; K03527 4-hydroxy-3-methylbut-2-enyl diphosphate reductase [EC:1.17.1.2] (A)	ko00900:Terpenoid backbone biosynthesis	--	--	LytB protein;; LytB protein	4-hydroxy-3-methylbut-2-enyl diphosphate reductase, chloroplastic (Precursor) GN=OSJNBa0079G12.18 OS=Oryza sativa subsp. japonica (Rice) PE=2 SV=1	I	Lipid transport and metabolism	4-hydroxy-3-methylbut-2-enyl diphosphate reductase [Triticum urartu]
F01_cb13079_c2/f2p1/1571	[H]	Coenzyme transport and metabolism	Molecular Function: dimethylallyltranstransferase activity (GO:0004161);; Molecular Function: farnesyltranstransferase activity (GO:0004311);; Molecular Function: geranyltranstransferase activity (GO:0004337);; Cellular Component: chloroplast (GO:0009507);; Biological Process: carotenoid biosynthetic process (GO:0016117);; Biological Process: geranyl diphosphate biosynthetic process (GO:0033384);…	K13789|2.76405e-176|mdm:103418313|geranylgeranyl pyrophosphate synthase, chloroplastic-like; K13789 geranylgeranyl diphosphate synthase, type II [EC:2.5.1.1 2.5.1.10 2.5.1.29] (A)	ko00900:Terpenoid backbone biosynthesis	[H]	Coenzyme transport and metabolism	Polyprenyl synthetase	Geranylgeranyl pyrophosphate synthase, chloroplastic (Precursor) GN=GGPS1 OS=Catharanthus roseus (Madagascar periwinkle) PE=3 SV=1	H	Coenzyme transport and metabolism	PREDICTED: geranylgeranyl pyrophosphate synthase, chloroplastic-like [Sesamum indicum]
F02_cb9382_c1/f2p0/2008	[I]	Lipid transport and metabolism	Molecular Function: phosphomevalonate kinase activity (GO:0004631);; Molecular Function: ATP binding (GO:0005524);; Biological Process: sterol biosynthetic process (GO:0016126);; Biological Process: phosphorylation (GO:0016310);; Biological Process: pentacyclic triterpenoid biosynthetic process (GO:0019745);;	K00938|0|sly:101256682|probable phosphomevalonate kinase; K00938 phosphomevalonate kinase [EC:2.7.4.2] (A)	ko00900:Terpenoid backbone biosynthesis	[I]	Lipid transport and metabolism	GHMP kinases N terminal domain;; GHMP kinases C terminal	--	I	Lipid transport and metabolism	5-phosphomevalonate kinase [Salvia miltiorrhiza]
F02_cb10536_c8/f1p0/1570	[I]	Lipid transport and metabolism	Molecular Function: diphosphomevalonate decarboxylase activity (GO:0004163);; Molecular Function: ATP binding (GO:0005524);; Biological Process: isoprenoid biosynthetic process (GO:0008299);; Molecular Function: protein homodimerization activity (GO:0042803);;	K01597|0|vvi:100251686|diphosphomevalonate decarboxylase; K01597 diphosphomevalonate decarboxylase [EC:4.1.1.33] (A)	ko00900:Terpenoid backbone biosynthesis	[I]	Lipid transport and metabolism	GHMP kinases N terminal domain	--	I	Lipid transport and metabolism	mevalonate diphosphate decarboxylase [Salvia miltiorrhiza]
F01_cb4189_c14/f1p2/1509	[H]	Coenzyme transport and metabolism	Molecular Function: dimethylallyltranstransferase activity (GO:0004161);; Molecular Function: geranyltranstransferase activity (GO:0004337);; Biological Process: isoprenoid biosynthetic process (GO:0008299);;	K00787|0|cmo:103501295|farnesyl pyrophosphate synthase 1; K00787 farnesyl diphosphate synthase [EC:2.5.1.1 2.5.1.10] (A)	ko00900:Terpenoid backbone biosynthesis	[H]	Coenzyme transport and metabolism	Polyprenyl synthetase	Farnesyl pyrophosphate synthase 1 GN=FPS1 OS=Lupinus albus (White lupin) PE=2 SV=1	H	Coenzyme transport and metabolism	farnesyl diphosphate synthetase [Salvia miltiorrhiza]
F02_cb11041_c54178/f1p0/2421	[I]	Lipid transport and metabolism	Molecular Function: hydroxymethylglutaryl-CoA reductase (NADPH) activity (GO:0004420);; Cellular Component: endoplasmic reticulum membrane (GO:0005789);; Biological Process: isoprenoid biosynthetic process (GO:0008299);; Biological Process: coenzyme A metabolic process (GO:0015936);; Cellular Component: integral component of membrane (GO:0016021);; Molecular Function: NADP binding (GO:0050661);; …	K00021|0|sot:102577899|3-hydroxy-3-methylglutaryl coenzyme A reductase; K00021 hydroxymethylglutaryl-CoA reductase (NADPH) [EC:1.1.1.34] (A)	ko00900:Terpenoid backbone biosynthesis	[I]	Lipid transport and metabolism	Hydroxymethylglutaryl-coenzyme A reductase	3-hydroxy-3-methylglutaryl-coenzyme A reductase OS=Camptotheca acuminata (Happy tree) PE=3 SV=1	I	Lipid transport and metabolism	hypothetical protein MIMGU_mgv1a003590mg [Erythranthe guttata]
F01_cb9887_c10/f1p0/1853	[H]	Coenzyme transport and metabolism	Molecular Function: trans-hexaprenyltranstransferase activity (GO:0000010);; Biological Process: isoprenoid biosynthetic process (GO:0008299);; Biological Process: photosynthesis (GO:0015979);;	K05356|1.6951e-139|sot:102593674|solanesyl diphosphate synthase 1-like; K05356 all-trans-nonaprenyl-diphosphate synthase [EC:2.5.1.84 2.5.1.85] (A)	ko00900:Terpenoid backbone biosynthesis	[H]	Coenzyme transport and metabolism	Polyprenyl synthetase;; Polyprenyl synthetase	Solanesyl diphosphate synthase 2, chloroplastic (Precursor) GN=F20D23.25 OS=Arabidopsis thaliana (Mouse-ear cress) PE=1 SV=1	H	Coenzyme transport and metabolism	PREDICTED: probable solanesyl-diphosphate synthase 3, chloroplastic isoform X2 [Sesamum indicum]
F01_cb16438_c41122/f1p0/2722	[I]	Lipid transport and metabolism	Molecular Function: iron ion binding (GO:0005506);; Biological Process: terpenoid biosynthetic process (GO:0016114);; Molecular Function: 4-hydroxy-3-methylbut-2-en-1-yl diphosphate synthase activity (GO:0046429);; Biological Process: oxidation-reduction process (GO:0055114);;	K03526|0|mdm:103422909|4-hydroxy-3-methylbut-2-en-1-yl diphosphate synthase, chloroplastic; K03526 (E)-4-hydroxy-3-methylbut-2-enyl-diphosphate synthase [EC:1.17.7.1 1.17.7.3] (A)	ko00900:Terpenoid backbone biosynthesis	--	--	GcpE protein;; GcpE protein	4-hydroxy-3-methylbut-2-en-1-yl diphosphate synthase, chloroplastic (Precursor) GN=MUP24.2 OS=Arabidopsis thaliana (Mouse-ear cress) PE=1 SV=1	I	Lipid transport and metabolism	(E)-4-hydroxy-3-methylbut-2-enyl diphosphate synthase [Salvia miltiorrhiza f. alba]
F01_cb16438_c15949/f1p0/2104	[I]	Lipid transport and metabolism	Molecular Function: hydroxymethylglutaryl-CoA reductase (NADPH) activity (GO:0004420);; Cellular Component: endoplasmic reticulum membrane (GO:0005789);; Biological Process: isoprenoid biosynthetic process (GO:0008299);; Biological Process: coenzyme A metabolic process (GO:0015936);; Cellular Component: integral component of membrane (GO:0016021);; Molecular Function: NADP binding (GO:0050661);; …	K00021|0|sot:102599791|hmg1; 3-hydroxy-3-methylglutaryl-coenzyme A reductase 1-like; K00021 hydroxymethylglutaryl-CoA reductase (NADPH) [EC:1.1.1.34] (A)	ko00900:Terpenoid backbone biosynthesis	[I]	Lipid transport and metabolism	Hydroxymethylglutaryl-coenzyme A reductase	3-hydroxy-3-methylglutaryl-coenzyme A reductase OS=Camptotheca acuminata (Happy tree) PE=3 SV=1	I	Lipid transport and metabolism	hypothetical protein MIMGU_mgv1a003590mg [Erythranthe guttata]
F01_cb10172_c20/f1p0/1374	[H]	Coenzyme transport and metabolism	Molecular Function: dimethylallyltranstransferase activity (GO:0004161);; Molecular Function: farnesyltranstransferase activity (GO:0004311);; Molecular Function: geranyltranstransferase activity (GO:0004337);; Cellular Component: chloroplast (GO:0009507);; Biological Process: carotenoid biosynthetic process (GO:0016117);; Biological Process: geranyl diphosphate biosynthetic process (GO:0033384);…	K13789|4.6062e-139|pxb:103967631|geranylgeranyl pyrophosphate synthase, chloroplastic-like; K13789 geranylgeranyl diphosphate synthase, type II [EC:2.5.1.1 2.5.1.10 2.5.1.29] (A)	ko00900:Terpenoid backbone biosynthesis	[H]	Coenzyme transport and metabolism	Polyprenyl synthetase	Geranylgeranyl pyrophosphate synthase, chloroplastic (Precursor) GN=GGPS1 OS=Capsicum annuum (Bell pepper) PE=3 SV=1	H	Coenzyme transport and metabolism	PREDICTED: geranylgeranyl pyrophosphate synthase, chloroplastic-like [Sesamum indicum]
F01_cb3740_c14/f1p0/449	--	--	Molecular Function: phosphomevalonate kinase activity (GO:0004631);; Molecular Function: ATP binding (GO:0005524);; Biological Process: phosphorylation (GO:0016310);;	K00938|4.74565e-26|pop:POPTR_0003s09680g|POPTRDRAFT_712033; GHMP kinase family protein; K00938 phosphomevalonate kinase [EC:2.7.4.2] (A)	ko00900:Terpenoid backbone biosynthesis	[I]	Lipid transport and metabolism	--	--	I	Lipid transport and metabolism	PREDICTED: phosphomevalonate kinase [Sesamum indicum]
F01_cb17402_c0/f2p2/1206	[H]	Coenzyme transport and metabolism	Biological Process: isoprenoid biosynthetic process (GO:0008299);; Molecular Function: transferase activity (GO:0016740);; Molecular Function: 2-alkenal reductase [NAD(P)] activity (GO:0032440);; Biological Process: oxidation-reduction process (GO:0055114);;	K13789|5.88646e-123|sly:101246371|heterodimeric geranylgeranyl pyrophosphate synthase small subunit, chloroplastic-like; K13789 geranylgeranyl diphosphate synthase, type II [EC:2.5.1.1 2.5.1.10 2.5.1.29] (A)	ko00900:Terpenoid backbone biosynthesis	[H]	Coenzyme transport and metabolism	Polyprenyl synthetase	Heterodimeric geranylgeranyl pyrophosphate synthase small subunit, chloroplastic (Precursor) GN=GGR OS=Arabidopsis thaliana (Mouse-ear cress) PE=1 SV=2	H	Coenzyme transport and metabolism	geranyl diphosphate synthase small subunit type II.2 [Salvia miltiorrhiza]
F01_cb16438_c64132/f1p0/2220	[I]	Lipid transport and metabolism	Molecular Function: hydroxymethylglutaryl-CoA reductase (NADPH) activity (GO:0004420);; Cellular Component: endoplasmic reticulum membrane (GO:0005789);; Biological Process: isoprenoid biosynthetic process (GO:0008299);; Biological Process: coenzyme A metabolic process (GO:0015936);; Cellular Component: integral component of membrane (GO:0016021);; Molecular Function: NADP binding (GO:0050661);; …	K00021|0|sot:102577899|3-hydroxy-3-methylglutaryl coenzyme A reductase; K00021 hydroxymethylglutaryl-CoA reductase (NADPH) [EC:1.1.1.34] (A)	ko00900:Terpenoid backbone biosynthesis	[I]	Lipid transport and metabolism	Hydroxymethylglutaryl-coenzyme A reductase	3-hydroxy-3-methylglutaryl-coenzyme A reductase OS=Camptotheca acuminata (Happy tree) PE=3 SV=1	I	Lipid transport and metabolism	hypothetical protein MIMGU_mgv1a003590mg [Erythranthe guttata]
F01_cb16438_c44482/f1p0/1667	[I]	Lipid transport and metabolism	Molecular Function: transferase activity, transferring alkyl or aryl (other than methyl) groups (GO:0016765);;	K11778|6.37663e-135|vvi:100251570|dehydrodolichyl diphosphate synthase 6-like; K11778 ditrans,polycis-polyprenyl diphosphate synthase [EC:2.5.1.87] (A)	ko00900:Terpenoid backbone biosynthesis	[I]	Lipid transport and metabolism	Putative undecaprenyl diphosphate synthase	Dehydrodolichyl diphosphate synthase 6 GN=At2g17570 OS=Arabidopsis thaliana (Mouse-ear cress) PE=2 SV=2	I	Lipid transport and metabolism	PREDICTED: dehydrodolichyl diphosphate synthase 6-like [Sesamum indicum]
F01_cb8041_c18/f1p0/1933	[I]	Lipid transport and metabolism	Biological Process: maltose metabolic process (GO:0000023);; Biological Process: sulfur amino acid metabolic process (GO:0000096);; Biological Process: pentose-phosphate shunt (GO:0006098);; Biological Process: glycine catabolic process (GO:0006546);; Biological Process: unsaturated fatty acid biosynthetic process (GO:0006636);; Biological Process: phosphatidylglycerol biosynthetic process (GO:00…	K00099|0|rcu:RCOM_1510580|1-deoxy-D-xylulose 5-phosphate reductoisomerase, chloroplast precursor, putative (EC:1.1.1.267); K00099 1-deoxy-D-xylulose-5-phosphate reductoisomerase [EC:1.1.1.267] (A)	ko00900:Terpenoid backbone biosynthesis	--	--	DXP reductoisomerase C-terminal domain;; 1-deoxy-D-xylulose 5-phosphate reductoisomerase C-terminal;; 1-deoxy-D-xylulose 5-phosphate reductoisomerase	1-deoxy-D-xylulose 5-phosphate reductoisomerase, chloroplastic (Precursor) GN=DXR OS=Mentha piperita (Peppermint) PE=2 SV=2	I	Lipid transport and metabolism	PREDICTED: 1-deoxy-D-xylulose 5-phosphate reductoisomerase, chloroplastic [Sesamum indicum]
F02_cb7697_c28/f1p0/1703	[IM]	--	Cellular Component: chloroplast stroma (GO:0009570);; Biological Process: isopentenyl diphosphate biosynthetic process, methylerythritol 4-phosphate pathway (GO:0019288);; Molecular Function: 4-hydroxy-3-methylbut-2-en-1-yl diphosphate synthase activity (GO:0046429);; Biological Process: response to antibiotic (GO:0046677);; Molecular Function: 4-hydroxy-3-methylbut-2-en-1-yl diphosphate reductas…	K03527|0|sly:100316901|ISPH protein; K03527 4-hydroxy-3-methylbut-2-enyl diphosphate reductase [EC:1.17.1.2] (A)	ko00900:Terpenoid backbone biosynthesis	--	--	LytB protein	4-hydroxy-3-methylbut-2-enyl diphosphate reductase, chloroplastic (Precursor) GN=F10M10.120 OS=Arabidopsis thaliana (Mouse-ear cress) PE=2 SV=1	I	Lipid transport and metabolism	PREDICTED: 4-hydroxy-3-methylbut-2-enyl diphosphate reductase, chloroplastic-like [Sesamum indicum]
F01_cb16438_c8270/f5p0/2249	[I]	Lipid transport and metabolism	Molecular Function: hydroxymethylglutaryl-CoA reductase (NADPH) activity (GO:0004420);; Cellular Component: endoplasmic reticulum membrane (GO:0005789);; Biological Process: isoprenoid biosynthetic process (GO:0008299);; Biological Process: coenzyme A metabolic process (GO:0015936);; Cellular Component: integral component of membrane (GO:0016021);; Molecular Function: NADP binding (GO:0050661);; …	K00021|0|sot:102577899|3-hydroxy-3-methylglutaryl coenzyme A reductase; K00021 hydroxymethylglutaryl-CoA reductase (NADPH) [EC:1.1.1.34] (A)	ko00900:Terpenoid backbone biosynthesis	[I]	Lipid transport and metabolism	Hydroxymethylglutaryl-coenzyme A reductase;; Hydroxymethylglutaryl-coenzyme A reductase	3-hydroxy-3-methylglutaryl-coenzyme A reductase OS=Camptotheca acuminata (Happy tree) PE=3 SV=1	I	Lipid transport and metabolism	PREDICTED: 3-hydroxy-3-methylglutaryl-coenzyme A reductase [Sesamum indicum]
F01_cb16438_c72371/f1p0/2182	[I]	Lipid transport and metabolism	Molecular Function: hydroxymethylglutaryl-CoA reductase (NADPH) activity (GO:0004420);; Cellular Component: endoplasmic reticulum membrane (GO:0005789);; Biological Process: isoprenoid biosynthetic process (GO:0008299);; Biological Process: coenzyme A metabolic process (GO:0015936);; Cellular Component: integral component of membrane (GO:0016021);; Molecular Function: NADP binding (GO:0050661);; …	K00021|0|sot:102599791|hmg1; 3-hydroxy-3-methylglutaryl-coenzyme A reductase 1-like; K00021 hydroxymethylglutaryl-CoA reductase (NADPH) [EC:1.1.1.34] (A)	ko00900:Terpenoid backbone biosynthesis	[I]	Lipid transport and metabolism	Hydroxymethylglutaryl-coenzyme A reductase;; Hydroxymethylglutaryl-coenzyme A reductase	3-hydroxy-3-methylglutaryl-coenzyme A reductase OS=Camptotheca acuminata (Happy tree) PE=3 SV=1	I	Lipid transport and metabolism	hypothetical protein MIMGU_mgv1a003590mg [Erythranthe guttata]
F02_cb11212_c0/f1p0/1824	--	--	--	K11778|6.76503e-86|sot:102596985|nogo-B receptor-like; K11778 ditrans,polycis-polyprenyl diphosphate synthase [EC:2.5.1.87] (A)	ko00900:Terpenoid backbone biosynthesis	--	--	--	--	S	Function unknown	PREDICTED: dehydrodolichyl diphosphate syntase complex subunit nus1-like [Sesamum indicum]
F01_cb16438_c44132/f1p3/2741	[I]	Lipid transport and metabolism	Biological Process: sulfur amino acid metabolic process (GO:0000096);; Biological Process: MAPK cascade (GO:0000165);; Molecular Function: iron ion binding (GO:0005506);; Biological Process: pentose-phosphate shunt (GO:0006098);; Biological Process: regulation of translation (GO:0006417);; Biological Process: glycine catabolic process (GO:0006546);; Biological Process: protein targeting to membra…	K03526|0|gmx:100801743|4-hydroxy-3-methylbut-2-en-1-yl diphosphate synthase, chloroplastic-like; K03526 (E)-4-hydroxy-3-methylbut-2-enyl-diphosphate synthase [EC:1.17.7.1 1.17.7.3] (A)	ko00900:Terpenoid backbone biosynthesis	--	--	GcpE protein	4-hydroxy-3-methylbut-2-en-1-yl diphosphate synthase, chloroplastic (Precursor) GN=MUP24.2 OS=Arabidopsis thaliana (Mouse-ear cress) PE=1 SV=1	I	Lipid transport and metabolism	(E)-4-hydroxy-3-methylbut-2-enyl diphosphate synthase [Salvia miltiorrhiza f. alba]
F02_cb9372_c0/f3p0/1807	[H]	Coenzyme transport and metabolism	Molecular Function: trans-hexaprenyltranstransferase activity (GO:0000010);; Biological Process: isoprenoid biosynthetic process (GO:0008299);; Biological Process: photosynthesis (GO:0015979);;	K05356|0|rcu:RCOM_1182760|solanesyl diphosphate synthase, putative (EC:2.5.1.30); K05356 all-trans-nonaprenyl-diphosphate synthase [EC:2.5.1.84 2.5.1.85] (A)	ko00900:Terpenoid backbone biosynthesis	[H]	Coenzyme transport and metabolism	Polyprenyl synthetase	Solanesyl diphosphate synthase 1 GN=T30F21.15 OS=Arabidopsis thaliana (Mouse-ear cress) PE=1 SV=1	H	Coenzyme transport and metabolism	PREDICTED: probable solanesyl-diphosphate synthase 3, chloroplastic isoform X2 [Sesamum indicum]
F01_cb21442_c1/f1p0/1240	[O]	Posttranslational modification, protein turnover, chaperones	Molecular Function: farnesyltranstransferase activity (GO:0004311);; Molecular Function: protein farnesyltransferase activity (GO:0004660);; Molecular Function: CAAX-protein geranylgeranyltransferase activity (GO:0004662);; Cellular Component: CAAX-protein geranylgeranyltransferase complex (GO:0005953);; Cellular Component: protein farnesyltransferase complex (GO:0005965);; Biological Process: re…	K05955|1.3439e-164|sly:544036|FTA, LeFTA; farnesyl protein transferase subunit A (EC:2.5.1.59 2.5.1.58); K05955 protein farnesyltransferase/geranylgeranyltransferase type-1 subunit alpha [EC:2.5.1.58 2.5.1.59] (A)	ko00900:Terpenoid backbone biosynthesis	[O]	Posttranslational modification, protein turnover, chaperones	Protein prenyltransferase alpha subunit repeat	Protein farnesyltransferase/geranylgeranyltransferase type-1 subunit alpha GN=FTA OS=Solanum lycopersicum (Tomato) PE=1 SV=1	O	Posttranslational modification, protein turnover, chaperones	PREDICTED: protein farnesyltransferase/geranylgeranyltransferase type-1 subunit alpha-like [Sesamum indicum]
F02_cb2495_c1/f1p0/3383	[I]	Lipid transport and metabolism	Molecular Function: transferase activity (GO:0016740);;	K11778|7.36994e-52|vvi:100251570|dehydrodolichyl diphosphate synthase 6-like; K11778 ditrans,polycis-polyprenyl diphosphate synthase [EC:2.5.1.87] (A)	ko00900:Terpenoid backbone biosynthesis	[I]	Lipid transport and metabolism	Putative undecaprenyl diphosphate synthase	Dehydrodolichyl diphosphate synthase 6 GN=At2g17570 OS=Arabidopsis thaliana (Mouse-ear cress) PE=2 SV=2	I	Lipid transport and metabolism	hypothetical protein MIMGU_mgv1a011616mg [Erythranthe guttata]
F01_cb15591_c5/f1p0/1561	[IM]	--	Cellular Component: chloroplast stroma (GO:0009570);; Biological Process: isopentenyl diphosphate biosynthetic process, methylerythritol 4-phosphate pathway (GO:0019288);; Molecular Function: 4-hydroxy-3-methylbut-2-en-1-yl diphosphate synthase activity (GO:0046429);; Biological Process: response to antibiotic (GO:0046677);; Molecular Function: 4-hydroxy-3-methylbut-2-en-1-yl diphosphate reductas…	K03527|2.13572e-169|sot:102592556|4-hydroxy-3-methylbut-2-enyl diphosphate reductase, chloroplastic-like; K03527 4-hydroxy-3-methylbut-2-enyl diphosphate reductase [EC:1.17.1.2] (A)	ko00900:Terpenoid backbone biosynthesis	--	--	LytB protein;; LytB protein	4-hydroxy-3-methylbut-2-enyl diphosphate reductase, chloroplastic (Precursor) GN=F10M10.120 OS=Arabidopsis thaliana (Mouse-ear cress) PE=2 SV=1	I	Lipid transport and metabolism	PREDICTED: 4-hydroxy-3-methylbut-2-enyl diphosphate reductase, chloroplastic-like [Sesamum indicum]
F02_cb8613_c4/f1p0/2203	[H]	Coenzyme transport and metabolism	Molecular Function: trans-hexaprenyltranstransferase activity (GO:0000010);; Molecular Function: dimethylallyltranstransferase activity (GO:0004161);; Biological Process: ubiquinone biosynthetic process (GO:0006744);; Biological Process: isoprenoid biosynthetic process (GO:0008299);; Cellular Component: chloroplast (GO:0009507);; Biological Process: embryo development (GO:0009790);; Molecular Fun…	K14066|1.08475e-103|sot:102588989|solanesyl diphosphate synthase 3, chloroplastic/mitochondrial-like; K14066 geranyl diphosphate synthase [EC:2.5.1.1] (A)	ko00900:Terpenoid backbone biosynthesis	[H]	Coenzyme transport and metabolism	Polyprenyl synthetase;; Polyprenyl synthetase	Solanesyl-diphosphate synthase 1, mitochondrial (Precursor) GN=SPS1 OS=Oryza sativa subsp. japonica (Rice) PE=1 SV=1	H	Coenzyme transport and metabolism	PREDICTED: solanesyl diphosphate synthase 3, chloroplastic/mitochondrial isoform X1 [Sesamum indicum]
F01_cb16438_c38596/f1p0/2906	[I]	Lipid transport and metabolism	Molecular Function: transferase activity, transferring alkyl or aryl (other than methyl) groups (GO:0016765);;	K11778|4.48525e-126|vvi:100251570|dehydrodolichyl diphosphate synthase 6-like; K11778 ditrans,polycis-polyprenyl diphosphate synthase [EC:2.5.1.87] (A)	ko00900:Terpenoid backbone biosynthesis	[I]	Lipid transport and metabolism	Putative undecaprenyl diphosphate synthase	Dehydrodolichyl diphosphate synthase 6 GN=At2g17570 OS=Arabidopsis thaliana (Mouse-ear cress) PE=2 SV=2	I	Lipid transport and metabolism	PREDICTED: dehydrodolichyl diphosphate synthase 6-like [Sesamum indicum]
F01_cb8168_c6/f1p0/2417	[I]	Lipid transport and metabolism	Molecular Function: hydroxymethylglutaryl-CoA reductase (NADPH) activity (GO:0004420);; Biological Process: isoprenoid biosynthetic process (GO:0008299);; Biological Process: coenzyme A metabolic process (GO:0015936);; Cellular Component: integral component of membrane (GO:0016021);; Molecular Function: NADP binding (GO:0050661);; Biological Process: oxidation-reduction process (GO:0055114);;	K00021|0|rcu:RCOM_1602200|hmg-CoA reductase, putative (EC:1.1.1.34); K00021 hydroxymethylglutaryl-CoA reductase (NADPH) [EC:1.1.1.34] (A)	ko00900:Terpenoid backbone biosynthesis	[I]	Lipid transport and metabolism	Hydroxymethylglutaryl-coenzyme A reductase	3-hydroxy-3-methylglutaryl-coenzyme A reductase 1 GN=HMGR1 OS=Hevea brasiliensis (Para rubber tree) PE=2 SV=1	I	Lipid transport and metabolism	3-hydroxy-3-methylglutaryl-coenzyme A reductase [Salvia miltiorrhiza]
F02_cb7697_c14/f1p0/2190	[IM]	--	Biological Process: isopentenyl diphosphate biosynthetic process, methylerythritol 4-phosphate pathway (GO:0019288);; Biological Process: oxidation-reduction process (GO:0055114);;	K03527|4.55884e-92|atr:s00059p00159100|AMTR_s00059p00159100; hypothetical protein; K03527 4-hydroxy-3-methylbut-2-enyl diphosphate reductase [EC:1.17.1.2] (A)	ko00900:Terpenoid backbone biosynthesis	--	--	LytB protein;; LytB protein;; LytB protein;; LytB protein	4-hydroxy-3-methylbut-2-enyl diphosphate reductase, chloroplastic (Precursor) GN=OSJNBa0079G12.18 OS=Oryza sativa subsp. japonica (Rice) PE=2 SV=1	I	Lipid transport and metabolism	PREDICTED: 4-hydroxy-3-methylbut-2-enyl diphosphate reductase, chloroplastic [Sesamum indicum]
F01_cb11122_c61/f1p0/1810	[H]	Coenzyme transport and metabolism	Molecular Function: trans-hexaprenyltranstransferase activity (GO:0000010);; Molecular Function: dimethylallyltranstransferase activity (GO:0004161);; Biological Process: ubiquinone biosynthetic process (GO:0006744);; Biological Process: isoprenoid biosynthetic process (GO:0008299);; Cellular Component: chloroplast (GO:0009507);; Biological Process: embryo development (GO:0009790);; Molecular Fun…	K14066|1.24682e-175|sot:102588989|solanesyl diphosphate synthase 3, chloroplastic/mitochondrial-like; K14066 geranyl diphosphate synthase [EC:2.5.1.1] (A)	ko00900:Terpenoid backbone biosynthesis	[H]	Coenzyme transport and metabolism	Polyprenyl synthetase;; Polyprenyl synthetase	Solanesyl diphosphate synthase 3, chloroplastic/mitochondrial (Precursor) GN=T31E10.3 OS=Arabidopsis thaliana (Mouse-ear cress) PE=1 SV=1	H	Coenzyme transport and metabolism	PREDICTED: solanesyl diphosphate synthase 3, chloroplastic/mitochondrial isoform X1 [Sesamum indicum]
F01_cb16438_c34687/f1p0/2591	[IM]	--	Biological Process: isopentenyl diphosphate biosynthetic process, methylerythritol 4-phosphate pathway (GO:0019288);; Molecular Function: 4-hydroxy-3-methylbut-2-en-1-yl diphosphate reductase activity (GO:0051745);; Biological Process: oxidation-reduction process (GO:0055114);;	K03527|2.81801e-159|vvi:100267479|4-hydroxy-3-methylbut-2-enyl diphosphate reductase, chloroplastic; K03527 4-hydroxy-3-methylbut-2-enyl diphosphate reductase [EC:1.17.1.2] (A)	ko00900:Terpenoid backbone biosynthesis	--	--	LytB protein;; LytB protein	4-hydroxy-3-methylbut-2-enyl diphosphate reductase, chloroplastic (Precursor) GN=F10M10.120 OS=Arabidopsis thaliana (Mouse-ear cress) PE=2 SV=1	I	Lipid transport and metabolism	PREDICTED: 4-hydroxy-3-methylbut-2-enyl diphosphate reductase, chloroplastic [Sesamum indicum]
F02_cb13834_c1/f1p0/1857	[I]	Lipid transport and metabolism	Molecular Function: isopentenyl-diphosphate delta-isomerase activity (GO:0004452);; Biological Process: isoprenoid biosynthetic process (GO:0008299);; Biological Process: photosynthesis (GO:0015979);; Biological Process: chlorophyll biosynthetic process (GO:0015995);; Molecular Function: hydrolase activity (GO:0016787);; Molecular Function: metal ion binding (GO:0046872);; Biological Process: dim…	K01823|1.53278e-78|mdm:103419532|isopentenyl-diphosphate Delta-isomerase I; K01823 isopentenyl-diphosphate delta-isomerase [EC:5.3.3.2] (A)	ko00900:Terpenoid backbone biosynthesis	[Q]	Secondary metabolites biosynthesis, transport and catabolism	--	Isopentenyl-diphosphate Delta-isomerase I GN=IPI1 OS=Camptotheca acuminata (Happy tree) PE=2 SV=1	I	Lipid transport and metabolism	isopentenyl diphosphate isomerase [Bupleurum chinense]
F01_cb9742_c10/f1p0/1783	[H]	Coenzyme transport and metabolism	Molecular Function: trans-hexaprenyltranstransferase activity (GO:0000010);; Molecular Function: dimethylallyltranstransferase activity (GO:0004161);; Biological Process: ubiquinone biosynthetic process (GO:0006744);; Biological Process: isoprenoid biosynthetic process (GO:0008299);; Cellular Component: chloroplast (GO:0009507);; Biological Process: embryo development (GO:0009790);; Molecular Fun…	K14066|1.54743e-169|gmx:100792725|solanesyl diphosphate synthase 3, chloroplastic/mitochondrial-like; K14066 geranyl diphosphate synthase [EC:2.5.1.1] (A)	ko00900:Terpenoid backbone biosynthesis	[H]	Coenzyme transport and metabolism	Polyprenyl synthetase	Solanesyl-diphosphate synthase 1, mitochondrial (Precursor) GN=SPS1 OS=Oryza sativa subsp. japonica (Rice) PE=1 SV=1	H	Coenzyme transport and metabolism	PREDICTED: solanesyl diphosphate synthase 3, chloroplastic/mitochondrial isoform X1 [Sesamum indicum]
F01_cb16232_c3/f1p0/1536	[I]	Lipid transport and metabolism	Molecular Function: transferase activity (GO:0016740);;	K11778|2.59002e-130|vvi:100251570|dehydrodolichyl diphosphate synthase 6-like; K11778 ditrans,polycis-polyprenyl diphosphate synthase [EC:2.5.1.87] (A)	ko00900:Terpenoid backbone biosynthesis	[I]	Lipid transport and metabolism	Putative undecaprenyl diphosphate synthase	Dehydrodolichyl diphosphate synthase 6 GN=At2g17570 OS=Arabidopsis thaliana (Mouse-ear cress) PE=2 SV=2	I	Lipid transport and metabolism	PREDICTED: dehydrodolichyl diphosphate synthase 6-like [Sesamum indicum]
F02_cb11041_c55425/f1p0/1972	[I]	Lipid transport and metabolism	Molecular Function: hydroxymethylglutaryl-CoA reductase (NADPH) activity (GO:0004420);; Cellular Component: endoplasmic reticulum membrane (GO:0005789);; Biological Process: isoprenoid biosynthetic process (GO:0008299);; Biological Process: coenzyme A metabolic process (GO:0015936);; Cellular Component: integral component of membrane (GO:0016021);; Molecular Function: NADP binding (GO:0050661);; …	K00021|0|sot:102599791|hmg1; 3-hydroxy-3-methylglutaryl-coenzyme A reductase 1-like; K00021 hydroxymethylglutaryl-CoA reductase (NADPH) [EC:1.1.1.34] (A)	ko00900:Terpenoid backbone biosynthesis	[I]	Lipid transport and metabolism	Hydroxymethylglutaryl-coenzyme A reductase	3-hydroxy-3-methylglutaryl-coenzyme A reductase OS=Camptotheca acuminata (Happy tree) PE=3 SV=1	I	Lipid transport and metabolism	PREDICTED: 3-hydroxy-3-methylglutaryl-coenzyme A reductase [Sesamum indicum]
F02_cb11041_c47165/f1p0/1479	[I]	Lipid transport and metabolism	Molecular Function: ATP binding (GO:0005524);; Biological Process: heme biosynthetic process (GO:0006783);; Cellular Component: chloroplast (GO:0009507);; Cellular Component: chromoplast (GO:0009509);; Biological Process: response to blue light (GO:0009637);; Biological Process: response to high light intensity (GO:0009644);; Biological Process: response to sucrose (GO:0009744);; Biological Proce…	K00919|2.53269e-142|sot:102601451|4-diphosphocytidyl-2-C-methyl-D-erythritol kinase, chloroplastic/chromoplastic-like; K00919 4-diphosphocytidyl-2-C-methyl-D-erythritol kinase [EC:2.7.1.148] (A)	ko00900:Terpenoid backbone biosynthesis	--	--	GHMP kinases N terminal domain	4-diphosphocytidyl-2-C-methyl-D-erythritol kinase, chloroplastic (Precursor) GN=ISPE OS=Mentha piperita (Peppermint) PE=1 SV=1	I	Lipid transport and metabolism	4-diphosphocytidyl-2-C-methyl-D-erythritol kinase [Salvia miltiorrhiza]
F02_cb9382_c6/f1p0/1912	[I]	Lipid transport and metabolism	Molecular Function: phosphomevalonate kinase activity (GO:0004631);; Molecular Function: ATP binding (GO:0005524);; Biological Process: sterol biosynthetic process (GO:0016126);; Biological Process: phosphorylation (GO:0016310);; Biological Process: pentacyclic triterpenoid biosynthetic process (GO:0019745);;	K00938|0|sly:101256682|probable phosphomevalonate kinase; K00938 phosphomevalonate kinase [EC:2.7.4.2] (A)	ko00900:Terpenoid backbone biosynthesis	[I]	Lipid transport and metabolism	GHMP kinases N terminal domain;; GHMP kinases C terminal	--	I	Lipid transport and metabolism	5-phosphomevalonate kinase [Salvia miltiorrhiza]
F02_cb11041_c38041/f1p0/2083	[I]	Lipid transport and metabolism	Molecular Function: hydroxymethylglutaryl-CoA reductase (NADPH) activity (GO:0004420);; Cellular Component: endoplasmic reticulum membrane (GO:0005789);; Biological Process: isoprenoid biosynthetic process (GO:0008299);; Biological Process: coenzyme A metabolic process (GO:0015936);; Cellular Component: integral component of membrane (GO:0016021);; Molecular Function: NADP binding (GO:0050661);; …	K00021|0|sly:101265292|HMG2; 3-hydroxy-3-methylglutaryl-coenzyme A reductase 2-like; K00021 hydroxymethylglutaryl-CoA reductase (NADPH) [EC:1.1.1.34] (A)	ko00900:Terpenoid backbone biosynthesis	[I]	Lipid transport and metabolism	Hydroxymethylglutaryl-coenzyme A reductase	3-hydroxy-3-methylglutaryl-coenzyme A reductase OS=Camptotheca acuminata (Happy tree) PE=3 SV=1	I	Lipid transport and metabolism	hypothetical protein MIMGU_mgv1a003590mg [Erythranthe guttata]
F02_cb8613_c5/f1p0/1721	[H]	Coenzyme transport and metabolism	Molecular Function: trans-hexaprenyltranstransferase activity (GO:0000010);; Molecular Function: dimethylallyltranstransferase activity (GO:0004161);; Biological Process: ubiquinone biosynthetic process (GO:0006744);; Biological Process: isoprenoid biosynthetic process (GO:0008299);; Cellular Component: chloroplast (GO:0009507);; Biological Process: embryo development (GO:0009790);; Molecular Fun…	K14066|9.82537e-148|gmx:100792725|solanesyl diphosphate synthase 3, chloroplastic/mitochondrial-like; K14066 geranyl diphosphate synthase [EC:2.5.1.1] (A)	ko00900:Terpenoid backbone biosynthesis	[H]	Coenzyme transport and metabolism	Polyprenyl synthetase	Solanesyl-diphosphate synthase 1, mitochondrial (Precursor) GN=SPS1 OS=Oryza sativa subsp. japonica (Rice) PE=1 SV=1	H	Coenzyme transport and metabolism	PREDICTED: solanesyl diphosphate synthase 3, chloroplastic/mitochondrial isoform X1 [Sesamum indicum]
F02_cb3805_c6/f1p0/2871	[O]	Posttranslational modification, protein turnover, chaperones	Molecular Function: prenyltransferase activity (GO:0004659);; Biological Process: protein prenylation (GO:0018342);; Biological Process: single-organism process (GO:0044699);; Biological Process: regulation of cellular process (GO:0050794);; Biological Process: response to oxygen-containing compound (GO:1901700);;	K05954|6.73698e-133|vvi:100266301|protein farnesyltransferase subunit beta; K05954 protein farnesyltransferase subunit beta [EC:2.5.1.58] (A)	ko00900:Terpenoid backbone biosynthesis	[O]	Posttranslational modification, protein turnover, chaperones	Prenyltransferase and squalene oxidase repeat;; Prenyltransferase and squalene oxidase repeat;; Prenyltransferase-like	Protein farnesyltransferase subunit beta GN=FTB OS=Pisum sativum (Garden pea) PE=1 SV=1	O	Posttranslational modification, protein turnover, chaperones	PREDICTED: protein farnesyltransferase subunit beta [Sesamum indicum]
F01_cb9742_c6/f1p0/2298	[H]	Coenzyme transport and metabolism	Molecular Function: dimethylallyltranstransferase activity (GO:0004161);; Biological Process: ubiquinone biosynthetic process (GO:0006744);; Biological Process: isoprenoid biosynthetic process (GO:0008299);; Cellular Component: chloroplast (GO:0009507);; Biological Process: embryo development (GO:0009790);; Molecular Function: trans-octaprenyltranstransferase activity (GO:0050347);;	K14066|1.33974e-136|sot:102588989|solanesyl diphosphate synthase 3, chloroplastic/mitochondrial-like; K14066 geranyl diphosphate synthase [EC:2.5.1.1] (A)	ko00900:Terpenoid backbone biosynthesis	[H]	Coenzyme transport and metabolism	Polyprenyl synthetase	Solanesyl-diphosphate synthase 1, mitochondrial (Precursor) GN=SPS1 OS=Oryza sativa subsp. japonica (Rice) PE=1 SV=1	H	Coenzyme transport and metabolism	PREDICTED: solanesyl diphosphate synthase 3, chloroplastic/mitochondrial isoform X1 [Sesamum indicum]
F01_cb3740_c4/f1p0/2603	[I]	Lipid transport and metabolism	Molecular Function: ATP binding (GO:0005524);; Molecular Function: kinase activity (GO:0016301);; Biological Process: phosphorylation (GO:0016310);;	K00938|1.24869e-76|pop:POPTR_0003s09680g|POPTRDRAFT_712033; GHMP kinase family protein; K00938 phosphomevalonate kinase [EC:2.7.4.2] (A)	ko00900:Terpenoid backbone biosynthesis	[I]	Lipid transport and metabolism	GHMP kinases N terminal domain	--	I	Lipid transport and metabolism	hypothetical protein MIMGU_mgv1a004811mg [Erythranthe guttata]
F02_cb7697_c36/f1p2/1721	[IM]	--	Biological Process: isopentenyl diphosphate biosynthetic process, methylerythritol 4-phosphate pathway (GO:0019288);; Biological Process: oxidation-reduction process (GO:0055114);;	K03527|0|vvi:100267479|4-hydroxy-3-methylbut-2-enyl diphosphate reductase, chloroplastic; K03527 4-hydroxy-3-methylbut-2-enyl diphosphate reductase [EC:1.17.1.2] (A)	ko00900:Terpenoid backbone biosynthesis	--	--	LytB protein	4-hydroxy-3-methylbut-2-enyl diphosphate reductase, chloroplastic (Precursor) GN=OSJNBa0079G12.18 OS=Oryza sativa subsp. japonica (Rice) PE=2 SV=1	I	Lipid transport and metabolism	PREDICTED: 4-hydroxy-3-methylbut-2-enyl diphosphate reductase, chloroplastic [Sesamum indicum]
F02_cb11041_c55576/f1p0/1457	[I]	Lipid transport and metabolism	Molecular Function: ATP binding (GO:0005524);; Biological Process: heme biosynthetic process (GO:0006783);; Cellular Component: chloroplast (GO:0009507);; Cellular Component: chromoplast (GO:0009509);; Biological Process: response to blue light (GO:0009637);; Biological Process: response to high light intensity (GO:0009644);; Biological Process: response to sucrose (GO:0009744);; Biological Proce…	K00919|7.14114e-131|sot:102601451|4-diphosphocytidyl-2-C-methyl-D-erythritol kinase, chloroplastic/chromoplastic-like; K00919 4-diphosphocytidyl-2-C-methyl-D-erythritol kinase [EC:2.7.1.148] (A)	ko00900:Terpenoid backbone biosynthesis	--	--	--	4-diphosphocytidyl-2-C-methyl-D-erythritol kinase, chloroplastic/chromoplastic (Precursor; Fragment) GN=ISPE OS=Solanum lycopersicum (Tomato) PE=1 SV=1	I	Lipid transport and metabolism	4-diphosphocytidyl-2-C-methyl-D-erythritol kinase [Salvia miltiorrhiza]
F01_cb9129_c8/f1p0/1089	[I]	Lipid transport and metabolism	Molecular Function: isopentenyl-diphosphate delta-isomerase activity (GO:0004452);; Biological Process: isoprenoid biosynthetic process (GO:0008299);; Biological Process: photosynthesis (GO:0015979);; Biological Process: chlorophyll biosynthetic process (GO:0015995);; Molecular Function: hydrolase activity (GO:0016787);; Molecular Function: metal ion binding (GO:0046872);; Biological Process: dim…	K01823|1.74451e-160|mdm:103414031|isopentenyl-diphosphate Delta-isomerase I-like; K01823 isopentenyl-diphosphate delta-isomerase [EC:5.3.3.2] (A)	ko00900:Terpenoid backbone biosynthesis	[Q]	Secondary metabolites biosynthesis, transport and catabolism	NUDIX domain	Isopentenyl-diphosphate Delta-isomerase II GN=IPI2 OS=Camptotheca acuminata (Happy tree) PE=2 SV=1	I	Lipid transport and metabolism	PREDICTED: isopentenyl-diphosphate Delta-isomerase I [Sesamum indicum]
F01_cb4189_c25/f40p2/1463	[H]	Coenzyme transport and metabolism	Molecular Function: dimethylallyltranstransferase activity (GO:0004161);; Molecular Function: geranyltranstransferase activity (GO:0004337);; Biological Process: isoprenoid biosynthetic process (GO:0008299);;	K00787|0|pop:POPTR_0006s00530g|POPTRDRAFT_560081; farnesyl-pyrophosphate synthetase fps2 family protein; K00787 farnesyl diphosphate synthase [EC:2.5.1.1 2.5.1.10] (A)	ko00900:Terpenoid backbone biosynthesis	[H]	Coenzyme transport and metabolism	Polyprenyl synthetase	Farnesyl pyrophosphate synthase 1 GN=FPS1 OS=Lupinus albus (White lupin) PE=2 SV=1	H	Coenzyme transport and metabolism	farnesyl diphosphate synthetase [Salvia miltiorrhiza]
F02_cb11607_c1/f2p0/1183	[I]	Lipid transport and metabolism	Molecular Function: isopentenyl-diphosphate delta-isomerase activity (GO:0004452);; Biological Process: isoprenoid biosynthetic process (GO:0008299);; Biological Process: photosynthesis (GO:0015979);; Biological Process: chlorophyll biosynthetic process (GO:0015995);; Molecular Function: hydrolase activity (GO:0016787);; Molecular Function: metal ion binding (GO:0046872);; Biological Process: dim…	K01823|1.60419e-139|sot:102580973|isopentenyl-diphosphate Delta-isomerase II-like; K01823 isopentenyl-diphosphate delta-isomerase [EC:5.3.3.2] (A)	ko00900:Terpenoid backbone biosynthesis	[Q]	Secondary metabolites biosynthesis, transport and catabolism	NUDIX domain	Isopentenyl-diphosphate Delta-isomerase I GN=IPI1 OS=Camptotheca acuminata (Happy tree) PE=2 SV=1	I	Lipid transport and metabolism	isopentenyl diphosphate isomerase [Ipomoea sp. Kenyan]
F02_cb15794_c1/f2p0/1239	[O]	Posttranslational modification, protein turnover, chaperones	Molecular Function: farnesyltranstransferase activity (GO:0004311);; Molecular Function: protein farnesyltransferase activity (GO:0004660);; Molecular Function: CAAX-protein geranylgeranyltransferase activity (GO:0004662);; Cellular Component: CAAX-protein geranylgeranyltransferase complex (GO:0005953);; Cellular Component: protein farnesyltransferase complex (GO:0005965);; Biological Process: re…	K05955|4.19129e-127|sly:544036|FTA, LeFTA; farnesyl protein transferase subunit A (EC:2.5.1.59 2.5.1.58); K05955 protein farnesyltransferase/geranylgeranyltransferase type-1 subunit alpha [EC:2.5.1.58 2.5.1.59] (A)	ko00900:Terpenoid backbone biosynthesis	[O]	Posttranslational modification, protein turnover, chaperones	Protein prenyltransferase alpha subunit repeat	Protein farnesyltransferase/geranylgeranyltransferase type-1 subunit alpha GN=FTA OS=Solanum lycopersicum (Tomato) PE=1 SV=1	O	Posttranslational modification, protein turnover, chaperones	PREDICTED: protein farnesyltransferase/geranylgeranyltransferase type-1 subunit alpha-like [Sesamum indicum]
F01_cb4189_c8/f1p0/2081	[H]	Coenzyme transport and metabolism	--	K00787|3.52116e-73|cmo:103501295|farnesyl pyrophosphate synthase 1; K00787 farnesyl diphosphate synthase [EC:2.5.1.1 2.5.1.10] (A)	ko00900:Terpenoid backbone biosynthesis	[H]	Coenzyme transport and metabolism	Polyprenyl synthetase	Farnesyl pyrophosphate synthase GN=FPS1 OS=Artemisia annua (Sweet wormwood) PE=2 SV=1	H	Coenzyme transport and metabolism	farnesyl diphosphate synthetase [Salvia miltiorrhiza]
F02_cb11946_c26/f1p0/1646	[H]	Coenzyme transport and metabolism	Molecular Function: dimethylallyltranstransferase activity (GO:0004161);; Molecular Function: farnesyltranstransferase activity (GO:0004311);; Molecular Function: geranyltranstransferase activity (GO:0004337);; Cellular Component: chloroplast (GO:0009507);; Biological Process: carotenoid biosynthetic process (GO:0016117);; Biological Process: geranyl diphosphate biosynthetic process (GO:0033384);…	K13789|1.79069e-137|pxb:103967631|geranylgeranyl pyrophosphate synthase, chloroplastic-like; K13789 geranylgeranyl diphosphate synthase, type II [EC:2.5.1.1 2.5.1.10 2.5.1.29] (A)	ko00900:Terpenoid backbone biosynthesis	[H]	Coenzyme transport and metabolism	Polyprenyl synthetase	Geranylgeranyl pyrophosphate synthase, chloroplastic (Precursor) GN=GGPS1 OS=Capsicum annuum (Bell pepper) PE=3 SV=1	H	Coenzyme transport and metabolism	PREDICTED: geranylgeranyl pyrophosphate synthase, chloroplastic-like [Sesamum indicum]

## Sheet: ko00902
File S3 The genes related to terpenoid biosynthesis
#GeneID	COG_class	COG_class_annotation	GO_annotation	KEGG_annotation	KEGG_pathway	KOG_class	KOG_class_annotation	Pfam_annotation	Swissprot_annotation	eggNOG_class	eggNOG_class_annotation	nr_annotation
F02_cb12151_c1/f1p0/1624	[IQR]	--	Biological Process: metabolic process (GO:0008152);; Molecular Function: oxidoreductase activity, acting on the CH-OH group of donors, NAD or NADP as acceptor (GO:0016616);; Biological Process: response to stimulus (GO:0050896);; Cellular Component: cell periphery (GO:0071944);;	K15095|3.80972e-43|pop:POPTR_0002s15770g|POPTRDRAFT_552142; hypothetical protein; K15095 (+)-neomenthol dehydrogenase [EC:1.1.1.208] (A)	ko00902:Monoterpenoid biosynthesis	[Q]	Secondary metabolites biosynthesis, transport and catabolism	short chain dehydrogenase;; Enoyl-(Acyl carrier protein) reductase;; KR domain	(+)-neomenthol dehydrogenase GN=MNR1 OS=Capsicum annuum (Bell pepper) PE=1 SV=1	S	Function unknown	PREDICTED: (+)-neomenthol dehydrogenase-like isoform X2 [Sesamum indicum]
F01_cb20048_c3/f1p0/1059	[IQR]	--	Cellular Component: cytosol (GO:0005829);; Cellular Component: plasma membrane (GO:0005886);; Biological Process: defense response (GO:0006952);; Molecular Function: alcohol dehydrogenase (NADP+) activity (GO:0008106);; Biological Process: response to sucrose (GO:0009744);; Biological Process: flavonoid biosynthetic process (GO:0009813);; Biological Process: response to UV-B (GO:0010224);; Molecu…	K15095|3.55213e-84|pvu:PHAVU_010G095300g|hypothetical protein; K15095 (+)-neomenthol dehydrogenase [EC:1.1.1.208] (A)	ko00902:Monoterpenoid biosynthesis	[Q]	Secondary metabolites biosynthesis, transport and catabolism	short chain dehydrogenase;; short chain dehydrogenase;; Enoyl-(Acyl carrier protein) reductase	(+)-neomenthol dehydrogenase GN=SDR1 OS=Arabidopsis thaliana (Mouse-ear cress) PE=1 SV=1	S	Function unknown	unnamed protein product [Coffea canephora]
F02_cb11041_c37321/f4p1/1930	--	--	Molecular Function: sesquiterpene synthase activity (GO:0010334);; Biological Process: farnesyl diphosphate catabolic process (GO:0045339);; Molecular Function: metal ion binding (GO:0046872);; Biological Process: (-)-exo-alpha-bergamotene biosynthetic process (GO:1901940);;	K18108|0|vvi:100232956|(-)-a-terpineol synthase (EC:4.2.3.111); K18108 (-)-alpha-terpineol synthase [EC:4.2.3.111] (A)	ko00902:Monoterpenoid biosynthesis	--	--	Terpene synthase family, metal binding domain;; Terpene synthase, N-terminal domain	Trans-alpha-bergamotene synthase OS=Phyla dulcis (Aztec sweet herb) PE=1 SV=1	O	Posttranslational modification, protein turnover, chaperones	PREDICTED: trans-alpha-bergamotene synthase-like [Sesamum indicum]
F02_cb19242_c0/f1p0/1219	[IQR]	--	Biological Process: metabolic process (GO:0008152);; Molecular Function: oxidoreductase activity (GO:0016491);;	K15095|3.43052e-85|sot:102582129|(+)-neomenthol dehydrogenase-like; K15095 (+)-neomenthol dehydrogenase [EC:1.1.1.208] (A)	ko00902:Monoterpenoid biosynthesis	[Q]	Secondary metabolites biosynthesis, transport and catabolism	short chain dehydrogenase;; KR domain;; Enoyl-(Acyl carrier protein) reductase	(+)-neomenthol dehydrogenase GN=MNR1 OS=Capsicum annuum (Bell pepper) PE=1 SV=1	S	Function unknown	PREDICTED: uncharacterized protein LOC105174344 [Sesamum indicum]
F01_cb16438_c45650/f1p0/1889	--	--	Molecular Function: magnesium ion binding (GO:0000287);; Cellular Component: plastid (GO:0009536);; Molecular Function: sesquiterpene synthase activity (GO:0010334);; Biological Process: terpenoid biosynthetic process (GO:0016114);; Biological Process: farnesyl diphosphate catabolic process (GO:0045339);; Biological Process: (-)-exo-alpha-bergamotene biosynthetic process (GO:1901940);;	K18108|4.5835e-149|vvi:100232956|(-)-a-terpineol synthase (EC:4.2.3.111); K18108 (-)-alpha-terpineol synthase [EC:4.2.3.111] (A)	ko00902:Monoterpenoid biosynthesis	--	--	Terpene synthase, N-terminal domain;; Terpene synthase family, metal binding domain	Trans-alpha-bergamotene synthase OS=Phyla dulcis (Aztec sweet herb) PE=1 SV=1	O	Posttranslational modification, protein turnover, chaperones	PREDICTED: trans-alpha-bergamotene synthase-like [Sesamum indicum]
F02_cb12472_c3/f1p0/533	--	--	Molecular Function: lyase activity (GO:0016829);; Molecular Function: metal ion binding (GO:0046872);;	K15086|1.77703e-42|rcu:RCOM_1574410|1,8-cineole synthase, chloroplast precursor, putative (EC:4.2.3.13); K15086 (3S)-linalool synthase [EC:4.2.3.25] (A)	ko00902:Monoterpenoid biosynthesis	--	--	Terpene synthase family, metal binding domain	Probable terpene synthase 4 GN=TPS4 OS=Ricinus communis (Castor bean) PE=3 SV=1	S	Function unknown	linalool synthase [Actinidia polygama]
F02_cb12472_c2/f1p0/1429	--	--	Biological Process: metabolic process (GO:0008152);; Molecular Function: lyase activity (GO:0016829);; Molecular Function: metal ion binding (GO:0046872);;	K15086|1.58249e-113|vvi:100853639|(3S,6E)-nerolidol synthase 1-like; K15086 (3S)-linalool synthase [EC:4.2.3.25] (A)	ko00902:Monoterpenoid biosynthesis	--	--	Terpene synthase family, metal binding domain;; Terpene synthase, N-terminal domain	(3S,6E)-nerolidol synthase 1 OS=Fragaria ananassa (Strawberry) PE=1 SV=1	S	Function unknown	linalool synthase [Actinidia polygama]
F02_cb16238_c3/f1p0/1000	[IQR]	--	Cellular Component: cytosol (GO:0005829);; Cellular Component: plasma membrane (GO:0005886);; Biological Process: defense response (GO:0006952);; Molecular Function: alcohol dehydrogenase (NADP+) activity (GO:0008106);; Biological Process: response to sucrose (GO:0009744);; Biological Process: flavonoid biosynthetic process (GO:0009813);; Biological Process: response to UV-B (GO:0010224);; Molecu…	K15095|4.16458e-83|cit:102610350|(+)-neomenthol dehydrogenase-like; K15095 (+)-neomenthol dehydrogenase [EC:1.1.1.208] (A)	ko00902:Monoterpenoid biosynthesis	[Q]	Secondary metabolites biosynthesis, transport and catabolism	short chain dehydrogenase;; Enoyl-(Acyl carrier protein) reductase;; KR domain	(+)-neomenthol dehydrogenase GN=SDR1 OS=Arabidopsis thaliana (Mouse-ear cress) PE=1 SV=1	S	Function unknown	unnamed protein product [Coffea canephora]
F02_cb12994_c2/f1p0/1404	[IQR]	--	Molecular Function: oxidoreductase activity (GO:0016491);;	K15095|6.77845e-69|sly:101251042|(+)-neomenthol dehydrogenase; K15095 (+)-neomenthol dehydrogenase [EC:1.1.1.208] (A)	ko00902:Monoterpenoid biosynthesis	[Q]	Secondary metabolites biosynthesis, transport and catabolism	short chain dehydrogenase;; Enoyl-(Acyl carrier protein) reductase;; KR domain;; NAD dependent epimerase/dehydratase family;; NADH(P)-binding	(+)-neomenthol dehydrogenase GN=MNR1 OS=Capsicum annuum (Bell pepper) PE=1 SV=1	S	Function unknown	PREDICTED: uncharacterized protein LOC105174344 [Sesamum indicum]
F02_cb19242_c1/f1p0/697	[IQR]	--	Biological Process: menthol biosynthetic process (GO:0031525);; Biological Process: terpene metabolic process (GO:0042214);; Molecular Function: (-)-isopiperitenone reductase activity (GO:0052581);; Molecular Function: NADPH binding (GO:0070402);;	K15095|6.59518e-37|sly:101263847|(+)-neomenthol dehydrogenase; K15095 (+)-neomenthol dehydrogenase [EC:1.1.1.208] (A)	ko00902:Monoterpenoid biosynthesis	[Q]	Secondary metabolites biosynthesis, transport and catabolism	short chain dehydrogenase;; Enoyl-(Acyl carrier protein) reductase;; KR domain;; NAD dependent epimerase/dehydratase family	(-)-isopiperitenone reductase OS=Mentha piperita (Peppermint) PE=1 SV=1	S	Function unknown	hypothetical protein MIMGU_mgv1a010340mg [Erythranthe guttata]
F01_cb10949_c0/f2p0/1919	--	--	Molecular Function: lyase activity (GO:0016829);; Molecular Function: metal ion binding (GO:0046872);;	K18108|1.35948e-174|vvi:100254181|	ko00902:Monoterpenoid biosynthesis	--	--	Terpene synthase family, metal binding domain;; Terpene synthase, N-terminal domain;; Terpene synthase, N-terminal domain	(-)-alpha-terpineol synthase OS=Vitis vinifera (Grape) PE=1 SV=1	O	Posttranslational modification, protein turnover, chaperones	hypothetical protein MIMGU_mgv1a003023mg [Erythranthe guttata]
F02_cb11041_c59132/f1p0/1984	--	--	Molecular Function: sesquiterpene synthase activity (GO:0010334);; Biological Process: farnesyl diphosphate catabolic process (GO:0045339);; Molecular Function: metal ion binding (GO:0046872);; Biological Process: (-)-exo-alpha-bergamotene biosynthetic process (GO:1901940);;	K18108|2.51647e-147|vvi:100232956|(-)-a-terpineol synthase (EC:4.2.3.111); K18108 (-)-alpha-terpineol synthase [EC:4.2.3.111] (A)	ko00902:Monoterpenoid biosynthesis	--	--	Terpene synthase family, metal binding domain;; Terpene synthase, N-terminal domain	Trans-alpha-bergamotene synthase OS=Phyla dulcis (Aztec sweet herb) PE=1 SV=1	O	Posttranslational modification, protein turnover, chaperones	PREDICTED: trans-alpha-bergamotene synthase-like [Sesamum indicum]
F02_cb11041_c41275/f1p0/2105	--	--	Molecular Function: magnesium ion binding (GO:0000287);; Molecular Function: sesquiterpene synthase activity (GO:0010334);; Biological Process: terpenoid biosynthetic process (GO:0016114);; Biological Process: farnesyl diphosphate catabolic process (GO:0045339);; Biological Process: (-)-exo-alpha-bergamotene biosynthetic process (GO:1901940);;	K18108|6.17855e-142|vvi:100232956|(-)-a-terpineol synthase (EC:4.2.3.111); K18108 (-)-alpha-terpineol synthase [EC:4.2.3.111] (A)	ko00902:Monoterpenoid biosynthesis	--	--	Terpene synthase family, metal binding domain;; Terpene synthase family, metal binding domain;; Terpene synthase, N-terminal domain	Trans-alpha-bergamotene synthase OS=Phyla dulcis (Aztec sweet herb) PE=1 SV=1	O	Posttranslational modification, protein turnover, chaperones	PREDICTED: trans-alpha-bergamotene synthase-like [Sesamum indicum]
F02_cb11041_c48265/f1p0/1938	--	--	Molecular Function: sesquiterpene synthase activity (GO:0010334);; Biological Process: farnesyl diphosphate catabolic process (GO:0045339);; Molecular Function: metal ion binding (GO:0046872);; Biological Process: (-)-exo-alpha-bergamotene biosynthetic process (GO:1901940);;	K18108|9.6891e-163|vvi:100232956|(-)-a-terpineol synthase (EC:4.2.3.111); K18108 (-)-alpha-terpineol synthase [EC:4.2.3.111] (A)	ko00902:Monoterpenoid biosynthesis	--	--	Terpene synthase family, metal binding domain;; Terpene synthase, N-terminal domain	Exo-alpha-bergamotene synthase OS=Lavandula angustifolia (Lavender) PE=1 SV=1	O	Posttranslational modification, protein turnover, chaperones	PREDICTED: trans-alpha-bergamotene synthase-like [Sesamum indicum]
F01_cb13640_c3/f1p0/1191	[IQR]	--	Biological Process: menthol biosynthetic process (GO:0031525);; Biological Process: terpene metabolic process (GO:0042214);; Cellular Component: cell part (GO:0044464);; Molecular Function: (-)-isopiperitenone reductase activity (GO:0052581);; Molecular Function: NADPH binding (GO:0070402);;	K15095|1.00655e-109|sot:102582129|(+)-neomenthol dehydrogenase-like; K15095 (+)-neomenthol dehydrogenase [EC:1.1.1.208] (A)	ko00902:Monoterpenoid biosynthesis	[Q]	Secondary metabolites biosynthesis, transport and catabolism	short chain dehydrogenase;; Enoyl-(Acyl carrier protein) reductase;; KR domain	(-)-isopiperitenone reductase OS=Mentha piperita (Peppermint) PE=1 SV=1	S	Function unknown	hypothetical protein MIMGU_mgv1a010340mg [Erythranthe guttata]
F02_cb11041_c37871/f2p1/3365	[RTKL]	--	Molecular Function: sesquiterpene synthase activity (GO:0010334);; Biological Process: farnesyl diphosphate catabolic process (GO:0045339);; Molecular Function: metal ion binding (GO:0046872);; Biological Process: (-)-exo-alpha-bergamotene biosynthetic process (GO:1901940);;	K18108|1.14758e-165|vvi:100232956|(-)-a-terpineol synthase (EC:4.2.3.111); K18108 (-)-alpha-terpineol synthase [EC:4.2.3.111] (A)	ko00902:Monoterpenoid biosynthesis	--	--	Protein kinase domain;; Protein tyrosine kinase;; Terpene synthase, N-terminal domain;; Terpene synthase family, metal binding domain	Trans-alpha-bergamotene synthase OS=Phyla dulcis (Aztec sweet herb) PE=1 SV=1	O	Posttranslational modification, protein turnover, chaperones	PREDICTED: trans-alpha-bergamotene synthase-like [Sesamum indicum]
F01_cb13640_c1/f1p0/1644	[IQR]	--	--	K15095|5.54885e-67|sly:101251042|(+)-neomenthol dehydrogenase; K15095 (+)-neomenthol dehydrogenase [EC:1.1.1.208] (A)	ko00902:Monoterpenoid biosynthesis	[Q]	Secondary metabolites biosynthesis, transport and catabolism	short chain dehydrogenase;; Enoyl-(Acyl carrier protein) reductase;; KR domain;; NAD dependent epimerase/dehydratase family	(-)-isopiperitenone reductase OS=Mentha piperita (Peppermint) PE=1 SV=1	S	Function unknown	PREDICTED: uncharacterized protein LOC105174344 [Sesamum indicum]
F01_cb16438_c33137/f1p1/1911	--	--	Biological Process: terpenoid metabolic process (GO:0006721);; Biological Process: isoprenoid biosynthetic process (GO:0008299);; Molecular Function: terpene synthase activity (GO:0010333);;	K18108|3.33952e-66|vvi:100232956|(-)-a-terpineol synthase (EC:4.2.3.111); K18108 (-)-alpha-terpineol synthase [EC:4.2.3.111] (A)	ko00902:Monoterpenoid biosynthesis	--	--	Terpene synthase family, metal binding domain	Trans-alpha-bergamotene synthase OS=Phyla dulcis (Aztec sweet herb) PE=1 SV=1	O	Posttranslational modification, protein turnover, chaperones	PREDICTED: trans-alpha-bergamotene synthase-like [Sesamum indicum]
F02_cb11003_c0/f3p0/1870	--	--	Molecular Function: magnesium ion binding (GO:0000287);; Cellular Component: plastid (GO:0009536);; Molecular Function: terpene synthase activity (GO:0010333);; Molecular Function: hydrolase activity (GO:0016787);; Molecular Function: manganese ion binding (GO:0030145);; Biological Process: geranyl diphosphate metabolic process (GO:0033383);; Molecular Function: protein homodimerization activity …	K15086|0|rcu:RCOM_1764780|1,8-cineole synthase, chloroplast precursor, putative (EC:4.2.3.20); K15086 (3S)-linalool synthase [EC:4.2.3.25] (A)	ko00902:Monoterpenoid biosynthesis	--	--	Terpene synthase family, metal binding domain;; Terpene synthase, N-terminal domain	Geraniol synthase, chloroplastic (Precursor) GN=GES OS=Ocimum basilicum (Sweet basil) PE=1 SV=1	O	Posttranslational modification, protein turnover, chaperones	PREDICTED: geraniol synthase, chloroplastic-like [Sesamum indicum]
F02_cb12472_c0/f1p0/1601	--	--	Molecular Function: lyase activity (GO:0016829);; Molecular Function: metal ion binding (GO:0046872);;	K15086|1.6332e-78|vvi:100853679|(3S,6E)-nerolidol synthase 1-like; K15086 (3S)-linalool synthase [EC:4.2.3.25] (A)	ko00902:Monoterpenoid biosynthesis	--	--	Terpene synthase family, metal binding domain;; Terpene synthase, N-terminal domain	Probable terpene synthase 4 GN=TPS4 OS=Ricinus communis (Castor bean) PE=3 SV=1	S	Function unknown	linalool synthase [Actinidia polygama]
F02_cb11041_c53709/f1p1/1970	--	--	Biological Process: metabolic process (GO:0008152);; Molecular Function: lyase activity (GO:0016829);; Molecular Function: metal ion binding (GO:0046872);;	K18108|4.26904e-131|vvi:100254181|	ko00902:Monoterpenoid biosynthesis	--	--	Terpene synthase family, metal binding domain;; Terpene synthase, N-terminal domain;; Terpene synthase family, metal binding domain	Trans-alpha-bergamotene synthase OS=Phyla dulcis (Aztec sweet herb) PE=1 SV=1	O	Posttranslational modification, protein turnover, chaperones	9-epi-caryophyllene synthase [Lavandula x intermedia]
F01_cb16438_c33233/f1p0/2020	--	--	Molecular Function: sesquiterpene synthase activity (GO:0010334);; Biological Process: farnesyl diphosphate catabolic process (GO:0045339);; Molecular Function: metal ion binding (GO:0046872);; Biological Process: (-)-exo-alpha-bergamotene biosynthetic process (GO:1901940);;	K18108|1.71408e-155|vvi:100232956|(-)-a-terpineol synthase (EC:4.2.3.111); K18108 (-)-alpha-terpineol synthase [EC:4.2.3.111] (A)	ko00902:Monoterpenoid biosynthesis	--	--	Terpene synthase, N-terminal domain;; Terpene synthase family, metal binding domain;; Terpene synthase family, metal binding domain;; Terpene synthase family, metal binding domain	Exo-alpha-bergamotene synthase OS=Lavandula angustifolia (Lavender) PE=1 SV=1	O	Posttranslational modification, protein turnover, chaperones	PREDICTED: trans-alpha-bergamotene synthase-like [Sesamum indicum]
F01_cb14444_c0/f1p0/1504	--	--	Molecular Function: carbon-oxygen lyase activity, acting on phosphates (GO:0016838);; Molecular Function: metal ion binding (GO:0046872);;	K15086|2.11891e-90|vvi:100853639|(3S,6E)-nerolidol synthase 1-like; K15086 (3S)-linalool synthase [EC:4.2.3.25] (A)	ko00902:Monoterpenoid biosynthesis	--	--	Terpene synthase family, metal binding domain;; Terpene synthase, N-terminal domain	(3S,6E)-nerolidol synthase 1 OS=Fragaria ananassa (Strawberry) PE=1 SV=1	S	Function unknown	linalool synthase [Actinidia polygama]
F01_cb21023_c0/f1p0/1049	[IQR]	--	Biological Process: metabolic process (GO:0008152);; Molecular Function: oxidoreductase activity, acting on the CH-OH group of donors, NAD or NADP as acceptor (GO:0016616);; Biological Process: response to stimulus (GO:0050896);; Cellular Component: cell periphery (GO:0071944);;	K15095|1.42718e-111|pop:POPTR_0002s15840g|POPTRDRAFT_644424; short-chain dehydrogenase/reductase family protein; K15095 (+)-neomenthol dehydrogenase [EC:1.1.1.208] (A)	ko00902:Monoterpenoid biosynthesis	[Q]	Secondary metabolites biosynthesis, transport and catabolism	short chain dehydrogenase;; Enoyl-(Acyl carrier protein) reductase;; KR domain;; NAD dependent epimerase/dehydratase family;; NADH(P)-binding	(+)-neomenthol dehydrogenase GN=SDR1 OS=Arabidopsis thaliana (Mouse-ear cress) PE=1 SV=1	S	Function unknown	PREDICTED: (+)-neomenthol dehydrogenase-like isoform X1 [Sesamum indicum]
F02_cb16238_c1/f2p1/1089	[IQR]	--	Biological Process: metabolic process (GO:0008152);;	K15095|4.92629e-131|sot:102582452|short-chain dehydrogenase/reductase 2b-like; K15095 (+)-neomenthol dehydrogenase [EC:1.1.1.208] (A)	ko00902:Monoterpenoid biosynthesis	[Q]	Secondary metabolites biosynthesis, transport and catabolism	short chain dehydrogenase;; Enoyl-(Acyl carrier protein) reductase;; KR domain	(+)-neomenthol dehydrogenase GN=SDR1 OS=Arabidopsis thaliana (Mouse-ear cress) PE=1 SV=1	S	Function unknown	hypothetical protein MIMGU_mgv1a010747mg [Erythranthe guttata]
F01_cb16438_c35713/f1p0/2051	--	--	Molecular Function: sesquiterpene synthase activity (GO:0010334);; Biological Process: farnesyl diphosphate catabolic process (GO:0045339);; Biological Process: (-)-exo-alpha-bergamotene biosynthetic process (GO:1901940);; Biological Process: (+)-epi-alpha-bisabolol biosynthetic process (GO:1901943);;	K18108|1.2155e-104|vvi:100232956|(-)-a-terpineol synthase (EC:4.2.3.111); K18108 (-)-alpha-terpineol synthase [EC:4.2.3.111] (A)	ko00902:Monoterpenoid biosynthesis	--	--	Terpene synthase, N-terminal domain;; Terpene synthase family, metal binding domain	Trans-alpha-bergamotene synthase OS=Phyla dulcis (Aztec sweet herb) PE=1 SV=1	O	Posttranslational modification, protein turnover, chaperones	RecName: Full=Trans-alpha-bergamotene synthase; AltName: Full=Terpene synthase 7; Short=LdTPS7 [Phyla dulcis]
F01_cb16438_c45530/f1p0/2068	--	--	Molecular Function: sesquiterpene synthase activity (GO:0010334);; Biological Process: farnesyl diphosphate catabolic process (GO:0045339);; Molecular Function: metal ion binding (GO:0046872);; Biological Process: (-)-exo-alpha-bergamotene biosynthetic process (GO:1901940);;	K18108|1.71592e-135|vvi:100232956|(-)-a-terpineol synthase (EC:4.2.3.111); K18108 (-)-alpha-terpineol synthase [EC:4.2.3.111] (A)	ko00902:Monoterpenoid biosynthesis	--	--	Terpene synthase family, metal binding domain;; Terpene synthase family, metal binding domain;; Terpene synthase, N-terminal domain	Trans-alpha-bergamotene synthase OS=Phyla dulcis (Aztec sweet herb) PE=1 SV=1	O	Posttranslational modification, protein turnover, chaperones	hypothetical protein MIMGU_mgv1a020580mg, partial [Erythranthe guttata]
F01_cb8678_c0/f1p0/2252	--	--	Molecular Function: lyase activity (GO:0016829);; Molecular Function: metal ion binding (GO:0046872);;	K18108|0|vvi:100232956|(-)-a-terpineol synthase (EC:4.2.3.111); K18108 (-)-alpha-terpineol synthase [EC:4.2.3.111] (A)	ko00902:Monoterpenoid biosynthesis	--	--	Terpene synthase family, metal binding domain;; Terpene synthase, N-terminal domain	1,8-cineole synthase, chloroplastic (Precursor) OS=Salvia officinalis (Sage) PE=1 SV=1	O	Posttranslational modification, protein turnover, chaperones	limonene-myrcene synthase [Erythranthe lewisii]
F01_cb16438_c46097/f1p0/1893	--	--	Molecular Function: sesquiterpene synthase activity (GO:0010334);; Biological Process: farnesyl diphosphate catabolic process (GO:0045339);; Molecular Function: metal ion binding (GO:0046872);; Biological Process: (-)-exo-alpha-bergamotene biosynthetic process (GO:1901940);;	K18108|1.40615e-162|vvi:100232956|(-)-a-terpineol synthase (EC:4.2.3.111); K18108 (-)-alpha-terpineol synthase [EC:4.2.3.111] (A)	ko00902:Monoterpenoid biosynthesis	--	--	Terpene synthase family, metal binding domain;; Terpene synthase, N-terminal domain;; Terpene synthase family, metal binding domain	Exo-alpha-bergamotene synthase OS=Lavandula angustifolia (Lavender) PE=1 SV=1	O	Posttranslational modification, protein turnover, chaperones	PREDICTED: trans-alpha-bergamotene synthase-like [Sesamum indicum]
F02_cb12151_c0/f1p0/1647	[IQR]	--	Biological Process: metabolic process (GO:0008152);; Molecular Function: oxidoreductase activity, acting on the CH-OH group of donors, NAD or NADP as acceptor (GO:0016616);; Biological Process: response to stimulus (GO:0050896);; Cellular Component: cell periphery (GO:0071944);;	K15095|2.96216e-43|pop:POPTR_0002s15770g|POPTRDRAFT_552142; hypothetical protein; K15095 (+)-neomenthol dehydrogenase [EC:1.1.1.208] (A)	ko00902:Monoterpenoid biosynthesis	[Q]	Secondary metabolites biosynthesis, transport and catabolism	short chain dehydrogenase;; Enoyl-(Acyl carrier protein) reductase;; KR domain;; NAD dependent epimerase/dehydratase family	(+)-neomenthol dehydrogenase GN=MNR1 OS=Capsicum annuum (Bell pepper) PE=1 SV=1	S	Function unknown	PREDICTED: (+)-neomenthol dehydrogenase-like isoform X2 [Sesamum indicum]
F02_cb16238_c2/f1p0/1178	[IQR]	--	--	K15095|4.79375e-93|pper:PRUPE_ppa018330mg|hypothetical protein; K15095 (+)-neomenthol dehydrogenase [EC:1.1.1.208] (A)	ko00902:Monoterpenoid biosynthesis	[Q]	Secondary metabolites biosynthesis, transport and catabolism	short chain dehydrogenase;; Enoyl-(Acyl carrier protein) reductase;; KR domain	Short-chain dehydrogenase/reductase 2b GN=F27D4.10 OS=Arabidopsis thaliana (Mouse-ear cress) PE=2 SV=1	S	Function unknown	hypothetical protein MIMGU_mgv1a010703mg [Erythranthe guttata]
F01_cb21023_c1/f1p0/1032	[IQR]	--	Biological Process: metabolic process (GO:0008152);; Molecular Function: oxidoreductase activity, acting on the CH-OH group of donors, NAD or NADP as acceptor (GO:0016616);; Biological Process: response to stimulus (GO:0050896);; Cellular Component: cell periphery (GO:0071944);;	K15095|3.26105e-112|pop:POPTR_0002s15840g|POPTRDRAFT_644424; short-chain dehydrogenase/reductase family protein; K15095 (+)-neomenthol dehydrogenase [EC:1.1.1.208] (A)	ko00902:Monoterpenoid biosynthesis	[Q]	Secondary metabolites biosynthesis, transport and catabolism	short chain dehydrogenase;; Enoyl-(Acyl carrier protein) reductase;; KR domain;; NAD dependent epimerase/dehydratase family;; NADH(P)-binding	(+)-neomenthol dehydrogenase GN=SDR1 OS=Arabidopsis thaliana (Mouse-ear cress) PE=1 SV=1	S	Function unknown	PREDICTED: (+)-neomenthol dehydrogenase-like isoform X1 [Sesamum indicum]
F02_cb12994_c1/f1p0/1419	[IQR]	--	Biological Process: menthol biosynthetic process (GO:0031525);; Biological Process: terpene metabolic process (GO:0042214);; Cellular Component: cell part (GO:0044464);; Molecular Function: (-)-isopiperitenone reductase activity (GO:0052581);; Molecular Function: NADPH binding (GO:0070402);;	K15095|2.82188e-96|pop:POPTR_0002s15840g|POPTRDRAFT_644424; short-chain dehydrogenase/reductase family protein; K15095 (+)-neomenthol dehydrogenase [EC:1.1.1.208] (A)	ko00902:Monoterpenoid biosynthesis	[Q]	Secondary metabolites biosynthesis, transport and catabolism	short chain dehydrogenase;; Enoyl-(Acyl carrier protein) reductase;; KR domain;; NAD dependent epimerase/dehydratase family	(-)-isopiperitenone reductase OS=Mentha piperita (Peppermint) PE=1 SV=1	S	Function unknown	PREDICTED: uncharacterized protein LOC105174344 [Sesamum indicum]
F01_cb16438_c34414/f1p0/1811	--	--	Molecular Function: sesquiterpene synthase activity (GO:0010334);; Biological Process: farnesyl diphosphate catabolic process (GO:0045339);; Molecular Function: metal ion binding (GO:0046872);; Biological Process: (-)-exo-alpha-bergamotene biosynthetic process (GO:1901940);;	K18108|1.07599e-171|vvi:100232956|(-)-a-terpineol synthase (EC:4.2.3.111); K18108 (-)-alpha-terpineol synthase [EC:4.2.3.111] (A)	ko00902:Monoterpenoid biosynthesis	--	--	Terpene synthase family, metal binding domain;; Terpene synthase, N-terminal domain	Trans-alpha-bergamotene synthase OS=Phyla dulcis (Aztec sweet herb) PE=1 SV=1	O	Posttranslational modification, protein turnover, chaperones	PREDICTED: trans-alpha-bergamotene synthase-like [Sesamum indicum]
F02_cb11041_c55852/f2p0/3155	[RTKL]	--	Molecular Function: sesquiterpene synthase activity (GO:0010334);; Biological Process: farnesyl diphosphate catabolic process (GO:0045339);; Biological Process: (-)-exo-alpha-bergamotene biosynthetic process (GO:1901940);;	K18108|1.04058e-130|vvi:100232956|(-)-a-terpineol synthase (EC:4.2.3.111); K18108 (-)-alpha-terpineol synthase [EC:4.2.3.111] (A)	ko00902:Monoterpenoid biosynthesis	--	--	Protein tyrosine kinase;; Protein kinase domain;; Terpene synthase family, metal binding domain;; Terpene synthase, N-terminal domain;; Terpene synthase family, metal binding domain	Trans-alpha-bergamotene synthase OS=Phyla dulcis (Aztec sweet herb) PE=1 SV=1	O	Posttranslational modification, protein turnover, chaperones	PREDICTED: trans-alpha-bergamotene synthase-like [Sesamum indicum]
F01_cb20048_c2/f1p0/1152	[IQR]	--	--	K15095|4.11621e-102|pper:PRUPE_ppa009290mg|hypothetical protein; K15095 (+)-neomenthol dehydrogenase [EC:1.1.1.208] (A)	ko00902:Monoterpenoid biosynthesis	[Q]	Secondary metabolites biosynthesis, transport and catabolism	short chain dehydrogenase;; Enoyl-(Acyl carrier protein) reductase;; KR domain	(+)-neomenthol dehydrogenase GN=SDR1 OS=Arabidopsis thaliana (Mouse-ear cress) PE=1 SV=1	S	Function unknown	hypothetical protein MIMGU_mgv1a010747mg [Erythranthe guttata]
F01_cb13640_c2/f1p0/1152	[IQR]	--	Biological Process: menthol biosynthetic process (GO:0031525);; Biological Process: terpene metabolic process (GO:0042214);; Cellular Component: cell part (GO:0044464);; Molecular Function: (-)-isopiperitenone reductase activity (GO:0052581);; Molecular Function: NADPH binding (GO:0070402);;	K15095|4.62516e-110|sot:102582129|(+)-neomenthol dehydrogenase-like; K15095 (+)-neomenthol dehydrogenase [EC:1.1.1.208] (A)	ko00902:Monoterpenoid biosynthesis	[Q]	Secondary metabolites biosynthesis, transport and catabolism	short chain dehydrogenase;; Enoyl-(Acyl carrier protein) reductase;; KR domain	(-)-isopiperitenone reductase OS=Mentha piperita (Peppermint) PE=1 SV=1	S	Function unknown	hypothetical protein MIMGU_mgv1a010340mg [Erythranthe guttata]
F02_cb16238_c0/f7p0/1156	[IQR]	--	Molecular Function: oxidoreductase activity (GO:0016491);; Biological Process: oxidation-reduction process (GO:0055114);;	K15095|3.12235e-131|vvi:100248214|(+)-neomenthol dehydrogenase; K15095 (+)-neomenthol dehydrogenase [EC:1.1.1.208] (A)	ko00902:Monoterpenoid biosynthesis	[Q]	Secondary metabolites biosynthesis, transport and catabolism	short chain dehydrogenase;; Enoyl-(Acyl carrier protein) reductase;; KR domain	(+)-neomenthol dehydrogenase GN=SDR1 OS=Arabidopsis thaliana (Mouse-ear cress) PE=1 SV=1	S	Function unknown	hypothetical protein MIMGU_mgv1a010747mg [Erythranthe guttata]
F02_cb11041_c58470/f1p1/1843	--	--	Molecular Function: sesquiterpene synthase activity (GO:0010334);; Biological Process: farnesyl diphosphate catabolic process (GO:0045339);; Biological Process: (-)-exo-alpha-bergamotene biosynthetic process (GO:1901940);;	K18108|8.15381e-153|vvi:100254181|	ko00902:Monoterpenoid biosynthesis	--	--	Terpene synthase family, metal binding domain;; Terpene synthase, N-terminal domain;; Terpene synthase, N-terminal domain	Trans-alpha-bergamotene synthase OS=Phyla dulcis (Aztec sweet herb) PE=1 SV=1	O	Posttranslational modification, protein turnover, chaperones	RecName: Full=Trans-alpha-bergamotene synthase; AltName: Full=Terpene synthase 7; Short=LdTPS7 [Phyla dulcis]
F02_cb12994_c3/f1p0/1214	[IQR]	--	Biological Process: menthol biosynthetic process (GO:0031525);; Biological Process: terpene metabolic process (GO:0042214);; Cellular Component: cell part (GO:0044464);; Molecular Function: (-)-isopiperitenone reductase activity (GO:0052581);; Molecular Function: NADPH binding (GO:0070402);;	K15095|4.61615e-97|pop:POPTR_0002s15840g|POPTRDRAFT_644424; short-chain dehydrogenase/reductase family protein; K15095 (+)-neomenthol dehydrogenase [EC:1.1.1.208] (A)	ko00902:Monoterpenoid biosynthesis	[Q]	Secondary metabolites biosynthesis, transport and catabolism	short chain dehydrogenase;; Enoyl-(Acyl carrier protein) reductase;; KR domain;; NAD dependent epimerase/dehydratase family	(-)-isopiperitenone reductase OS=Mentha piperita (Peppermint) PE=1 SV=1	S	Function unknown	PREDICTED: uncharacterized protein LOC105174344 [Sesamum indicum]
F01_cb13640_c4/f1p0/1211	[IQR]	--	Biological Process: menthol biosynthetic process (GO:0031525);; Biological Process: terpene metabolic process (GO:0042214);; Cellular Component: cell part (GO:0044464);; Molecular Function: (-)-isopiperitenone reductase activity (GO:0052581);; Molecular Function: NADPH binding (GO:0070402);;	K15095|4.18986e-97|pop:POPTR_0002s15840g|POPTRDRAFT_644424; short-chain dehydrogenase/reductase family protein; K15095 (+)-neomenthol dehydrogenase [EC:1.1.1.208] (A)	ko00902:Monoterpenoid biosynthesis	[Q]	Secondary metabolites biosynthesis, transport and catabolism	short chain dehydrogenase;; Enoyl-(Acyl carrier protein) reductase;; KR domain;; NAD dependent epimerase/dehydratase family	(-)-isopiperitenone reductase OS=Mentha piperita (Peppermint) PE=1 SV=1	S	Function unknown	PREDICTED: uncharacterized protein LOC105174344 [Sesamum indicum]
F01_cb14271_c0/f2p0/1133	[IQR]	--	Biological Process: metabolic process (GO:0008152);;	K15095|9.90694e-130|pper:PRUPE_ppa009290mg|hypothetical protein; K15095 (+)-neomenthol dehydrogenase [EC:1.1.1.208] (A)	ko00902:Monoterpenoid biosynthesis	[Q]	Secondary metabolites biosynthesis, transport and catabolism	short chain dehydrogenase;; Enoyl-(Acyl carrier protein) reductase;; KR domain;; NAD dependent epimerase/dehydratase family	(+)-neomenthol dehydrogenase GN=SDR1 OS=Arabidopsis thaliana (Mouse-ear cress) PE=1 SV=1	S	Function unknown	hypothetical protein MIMGU_mgv1a010747mg [Erythranthe guttata]
F01_cb13640_c0/f1p0/1432	[IQR]	--	Biological Process: menthol biosynthetic process (GO:0031525);; Biological Process: terpene metabolic process (GO:0042214);; Cellular Component: cell part (GO:0044464);; Molecular Function: (-)-isopiperitenone reductase activity (GO:0052581);; Molecular Function: NADPH binding (GO:0070402);;	K15095|1.6472e-74|pop:POPTR_0002s15840g|POPTRDRAFT_644424; short-chain dehydrogenase/reductase family protein; K15095 (+)-neomenthol dehydrogenase [EC:1.1.1.208] (A)	ko00902:Monoterpenoid biosynthesis	[Q]	Secondary metabolites biosynthesis, transport and catabolism	short chain dehydrogenase;; Enoyl-(Acyl carrier protein) reductase;; KR domain;; NAD dependent epimerase/dehydratase family	(-)-isopiperitenone reductase OS=Mentha piperita (Peppermint) PE=1 SV=1	S	Function unknown	PREDICTED: uncharacterized protein LOC105174344 [Sesamum indicum]
F01_cb20048_c1/f1p0/990	[IQR]	--	--	K15095|3.13428e-83|pxb:103939491|(+)-neomenthol dehydrogenase-like; K15095 (+)-neomenthol dehydrogenase [EC:1.1.1.208] (A)	ko00902:Monoterpenoid biosynthesis	[Q]	Secondary metabolites biosynthesis, transport and catabolism	short chain dehydrogenase	(+)-neomenthol dehydrogenase GN=SDR1 OS=Arabidopsis thaliana (Mouse-ear cress) PE=1 SV=1	S	Function unknown	hypothetical protein MIMGU_mgv1a010747mg [Erythranthe guttata]

## Sheet: ko00904
File S3 The genes related to terpenoid biosynthesis
#GeneID	COG_class	COG_class_annotation	GO_annotation	KEGG_annotation	KEGG_pathway	KOG_class	KOG_class_annotation	Pfam_annotation	Swissprot_annotation	eggNOG_class	eggNOG_class_annotation	nr_annotation
F02_cb8824_c2/f1p0/1808	[Q]	Secondary metabolites biosynthesis, transport and catabolism	--	K04123|1.90609e-180|fve:101291058|ent-kaurenoic acid oxidase 1-like; K04123 ent-kaurenoic acid hydroxylase [EC:1.14.13.79] (A)	ko00904:Diterpenoid biosynthesis	[QI]	--	Cytochrome P450;; Cytochrome P450	Ent-kaurenoic acid oxidase 2 GN=T32F6.4 OS=Arabidopsis thaliana (Mouse-ear cress) PE=2 SV=2	Q	Secondary metabolites biosynthesis, transport and catabolism	PREDICTED: ent-kaurenoic acid oxidase 2-like [Sesamum indicum]
F02_cb13134_c1/f1p0/1473	--	--	Molecular Function: oxidoreductase activity (GO:0016491);;	K05282|1.55202e-132|sot:102584697|ga20ox1; gibberellin 20 oxidase 1-like; K05282 gibberellin 20-oxidase [EC:1.14.11.12] (A)	ko00904:Diterpenoid biosynthesis	[QR]	--	2OG-Fe(II) oxygenase superfamily;; non-haem dioxygenase in morphine synthesis N-terminal	Gibberellin 20 oxidase 1 GN=At4g25420 OS=Arabidopsis thaliana (Mouse-ear cress) PE=2 SV=2	S	Function unknown	PREDICTED: gibberellin 20 oxidase 1-D-like [Sesamum indicum]
F02_cb13134_c4/f1p0/952	--	--	Molecular Function: iron ion binding (GO:0005506);; Molecular Function: oxidoreductase activity, acting on paired donors, with incorporation or reduction of molecular oxygen, 2-oxoglutarate as one donor, and incorporation of one atom each of oxygen into both donors (GO:0016706);; Biological Process: oxidation-reduction process (GO:0055114);;	K05282|3.56543e-109|sot:102597267|ga20ox3; gibberellin 20 oxidase 1-like; K05282 gibberellin 20-oxidase [EC:1.14.11.12] (A)	ko00904:Diterpenoid biosynthesis	[QR]	--	2OG-Fe(II) oxygenase superfamily	Gibberellin 20 oxidase 1-D GN=GA20ox1D OS=Triticum aestivum (Wheat) PE=1 SV=1	S	Function unknown	Ntc12 [Nicotiana tabacum]
F01_cb16438_c41134/f1p2/1975	[Q]	Secondary metabolites biosynthesis, transport and catabolism	Molecular Function: monooxygenase activity (GO:0004497);; Molecular Function: oxidoreductase activity, acting on paired donors, with incorporation or reduction of molecular oxygen (GO:0016705);; Molecular Function: metal ion binding (GO:0046872);;	K17961|9.47876e-177|sot:102585194|cytochrome P450 82C4-like; K17961 cytochrome P450, family 82, subfamily G, polypeptide 1 [EC:1.14.-.-] (A)	ko00904:Diterpenoid biosynthesis	[Q]	Secondary metabolites biosynthesis, transport and catabolism	Cytochrome P450	Cytochrome P450 82G1 GN=CYP82G1 OS=Arabidopsis thaliana (Mouse-ear cress) PE=1 SV=1	Q	Secondary metabolites biosynthesis, transport and catabolism	cytochrome P450 CYP82U4 [Salvia miltiorrhiza]
F02_cb8824_c7/f1p0/2112	[Q]	Secondary metabolites biosynthesis, transport and catabolism	--	K04123|3.90165e-98|fve:101291343|ent-kaurenoic acid oxidase 2-like; K04123 ent-kaurenoic acid hydroxylase [EC:1.14.13.79] (A)	ko00904:Diterpenoid biosynthesis	[QI]	--	Cytochrome P450	Beta-amyrin 11-oxidase GN=CYP88D6 OS=Glycyrrhiza uralensis (Chinese licorice) PE=1 SV=1	Q	Secondary metabolites biosynthesis, transport and catabolism	PREDICTED: ent-kaurenoic acid oxidase 2-like [Sesamum indicum]
F01_cb17064_c0/f2p0/1474	[R]	General function prediction only	Molecular Function: iron ion binding (GO:0005506);; Molecular Function: oxidoreductase activity, acting on paired donors, with incorporation or reduction of molecular oxygen, 2-oxoglutarate as one donor, and incorporation of one atom each of oxygen into both donors (GO:0016706);; Biological Process: oxidation-reduction process (GO:0055114);;	K05282|6.72474e-151|sot:102584697|ga20ox1; gibberellin 20 oxidase 1-like; K05282 gibberellin 20-oxidase [EC:1.14.11.12] (A)	ko00904:Diterpenoid biosynthesis	[QR]	--	2OG-Fe(II) oxygenase superfamily;; non-haem dioxygenase in morphine synthesis N-terminal	Gibberellin 20 oxidase 1 GN=At4g25420 OS=Arabidopsis thaliana (Mouse-ear cress) PE=2 SV=2	S	Function unknown	gibberellin 20-oxidase [Torenia fournieri]
F01_cb10490_c3/f1p1/1973	[Q]	Secondary metabolites biosynthesis, transport and catabolism	Molecular Function: monooxygenase activity (GO:0004497);; Molecular Function: iron ion binding (GO:0005506);; Molecular Function: electron carrier activity (GO:0009055);; Molecular Function: oxidoreductase activity, acting on paired donors, with incorporation or reduction of molecular oxygen (GO:0016705);; Molecular Function: heme binding (GO:0020037);; Biological Process: oxidation-reduction pro…	K04123|0|sot:102603753|ent-kaurenoic acid oxidase 2-like; K04123 ent-kaurenoic acid hydroxylase [EC:1.14.13.79] (A)	ko00904:Diterpenoid biosynthesis	[QI]	--	Cytochrome P450	Ent-kaurenoic acid oxidase 1 GN=YUP8H12.23 OS=Arabidopsis thaliana (Mouse-ear cress) PE=2 SV=1	Q	Secondary metabolites biosynthesis, transport and catabolism	PREDICTED: ent-kaurenoic acid oxidase 1-like [Sesamum indicum]
F01_cb9347_c10/f1p0/1887	[Q]	Secondary metabolites biosynthesis, transport and catabolism	--	K04123|8.30725e-165|fve:101291058|ent-kaurenoic acid oxidase 1-like; K04123 ent-kaurenoic acid hydroxylase [EC:1.14.13.79] (A)	ko00904:Diterpenoid biosynthesis	[QI]	--	Cytochrome P450;; Cytochrome P450	Ent-kaurenoic acid oxidase 1 GN=YUP8H12.23 OS=Arabidopsis thaliana (Mouse-ear cress) PE=2 SV=1	Q	Secondary metabolites biosynthesis, transport and catabolism	PREDICTED: ent-kaurenoic acid oxidase 2-like [Sesamum indicum]
F01_cb10490_c12/f6p1/2001	[Q]	Secondary metabolites biosynthesis, transport and catabolism	Molecular Function: monooxygenase activity (GO:0004497);; Molecular Function: iron ion binding (GO:0005506);; Molecular Function: electron carrier activity (GO:0009055);; Molecular Function: oxidoreductase activity, acting on paired donors, with incorporation or reduction of molecular oxygen (GO:0016705);; Molecular Function: heme binding (GO:0020037);; Biological Process: oxidation-reduction pro…	K04123|0|sot:102603753|ent-kaurenoic acid oxidase 2-like; K04123 ent-kaurenoic acid hydroxylase [EC:1.14.13.79] (A)	ko00904:Diterpenoid biosynthesis	[QI]	--	Cytochrome P450	Ent-kaurenoic acid oxidase 1 GN=YUP8H12.23 OS=Arabidopsis thaliana (Mouse-ear cress) PE=2 SV=1	Q	Secondary metabolites biosynthesis, transport and catabolism	PREDICTED: ent-kaurenoic acid oxidase 1-like [Sesamum indicum]
F01_cb10490_c6/f1p0/1579	[Q]	Secondary metabolites biosynthesis, transport and catabolism	Molecular Function: monooxygenase activity (GO:0004497);; Molecular Function: iron ion binding (GO:0005506);; Molecular Function: electron carrier activity (GO:0009055);; Molecular Function: oxidoreductase activity, acting on paired donors, with incorporation or reduction of molecular oxygen (GO:0016705);; Molecular Function: heme binding (GO:0020037);; Biological Process: oxidation-reduction pro…	K04123|0|sot:102603753|ent-kaurenoic acid oxidase 2-like; K04123 ent-kaurenoic acid hydroxylase [EC:1.14.13.79] (A)	ko00904:Diterpenoid biosynthesis	[QI]	--	Cytochrome P450	Ent-kaurenoic acid oxidase 1 GN=YUP8H12.23 OS=Arabidopsis thaliana (Mouse-ear cress) PE=2 SV=1	Q	Secondary metabolites biosynthesis, transport and catabolism	PREDICTED: ent-kaurenoic acid oxidase 1-like [Sesamum indicum]
F01_cb12252_c2/f3p0/2134	--	--	--	K17982|0|tcc:TCM_029935|P(E)-nerolidol/(E,E)-geranyl linalool synthase, putative; K17982 geranyllinalool synthase [EC:4.2.3.144] (A)	ko00904:Diterpenoid biosynthesis	--	--	Terpene synthase family, metal binding domain;; Terpene synthase, N-terminal domain;; Terpene synthase family, metal binding domain	(E,E)-geranyllinalool synthase GN=F11P17.15 OS=Arabidopsis thaliana (Mouse-ear cress) PE=1 SV=1	S	Function unknown	unnamed protein product [Coffea canephora]
F02_cb5432_c5/f1p0/1626	--	--	Molecular Function: magnesium ion binding (GO:0000287);; Biological Process: metabolic process (GO:0008152);; Cellular Component: plastid (GO:0009536);; Molecular Function: terpene synthase activity (GO:0010333);; Biological Process: single-organism cellular process (GO:0044763);;	K04121|7.75793e-138|sot:102602928|ent-kaur-16-ene synthase, chloroplastic-like; K04121 ent-kaurene synthase [EC:4.2.3.19] (A)	ko00904:Diterpenoid biosynthesis	--	--	Terpene synthase family, metal binding domain;; Terpene synthase, N-terminal domain	Ent-kaur-16-ene synthase, chloroplastic (Precursor) GN=T8K14.12 OS=Arabidopsis thaliana (Mouse-ear cress) PE=1 SV=1	I	Lipid transport and metabolism	ent-kaurene synthase, partial [Marrubium vulgare]
F02_cb8824_c3/f1p1/1950	[Q]	Secondary metabolites biosynthesis, transport and catabolism	--	K04123|3.34367e-125|fve:101291343|ent-kaurenoic acid oxidase 2-like; K04123 ent-kaurenoic acid hydroxylase [EC:1.14.13.79] (A)	ko00904:Diterpenoid biosynthesis	[QI]	--	Cytochrome P450	Beta-amyrin 11-oxidase GN=CYP88D6 OS=Glycyrrhiza uralensis (Chinese licorice) PE=1 SV=1	Q	Secondary metabolites biosynthesis, transport and catabolism	PREDICTED: ent-kaurenoic acid oxidase 2-like [Sesamum indicum]
F01_cb7890_c5/f1p0/1786	[Q]	Secondary metabolites biosynthesis, transport and catabolism	Molecular Function: iron ion binding (GO:0005506);; Cellular Component: endoplasmic reticulum (GO:0005783);; Molecular Function: electron carrier activity (GO:0009055);; Biological Process: gibberellin biosynthetic process (GO:0009686);; Molecular Function: oxygen binding (GO:0019825);; Molecular Function: heme binding (GO:0020037);; Molecular Function: ent-kaurenoate oxidase activity (GO:0051777…	K04123|0|cic:CICLE_v10019986mg|hypothetical protein; K04123 ent-kaurenoic acid hydroxylase [EC:1.14.13.79] (A)	ko00904:Diterpenoid biosynthesis	[QI]	--	Cytochrome P450	Ent-kaurenoic acid oxidase 1 GN=YUP8H12.23 OS=Arabidopsis thaliana (Mouse-ear cress) PE=2 SV=1	Q	Secondary metabolites biosynthesis, transport and catabolism	PREDICTED: ent-kaurenoic acid oxidase 1-like [Sesamum indicum]
F01_cb4368_c1/f1p0/2986	--	--	Molecular Function: magnesium ion binding (GO:0000287);; Biological Process: metabolic process (GO:0008152);; Molecular Function: terpene synthase activity (GO:0010333);;	K04121|0|pxb:103937596|ent-kaur-16-ene synthase, chloroplastic-like; K04121 ent-kaurene synthase [EC:4.2.3.19] (A)	ko00904:Diterpenoid biosynthesis	--	--	Terpene synthase family, metal binding domain;; Terpene synthase, N-terminal domain;; Prenyltransferase-like	Ent-kaurene synthase-like 3 GN=OSJNBa0070C17.6 OS=Oryza sativa subsp. japonica (Rice) PE=2 SV=1	I	Lipid transport and metabolism	ent-kaurene synthase, partial [Marrubium vulgare]
F01_cb12252_c10/f1p0/2737	--	--	--	K17982|3.4404e-149|vvi:100264943|(E,E)-geranyllinalool synthase-like; K17982 geranyllinalool synthase [EC:4.2.3.144] (A)	ko00904:Diterpenoid biosynthesis	--	--	Terpene synthase family, metal binding domain;; Terpene synthase, N-terminal domain;; Terpene synthase, N-terminal domain	(E,E)-geranyllinalool synthase GN=F11P17.15 OS=Arabidopsis thaliana (Mouse-ear cress) PE=1 SV=1	S	Function unknown	unnamed protein product [Coffea canephora]
F02_cb11653_c3/f1p0/1780	[Q]	Secondary metabolites biosynthesis, transport and catabolism	Molecular Function: monooxygenase activity (GO:0004497);; Molecular Function: iron ion binding (GO:0005506);; Molecular Function: electron carrier activity (GO:0009055);; Molecular Function: oxidoreductase activity, acting on paired donors, with incorporation or reduction of molecular oxygen (GO:0016705);; Molecular Function: heme binding (GO:0020037);; Biological Process: oxidation-reduction pro…	K04122|0|sly:101267112|ent-kaurene oxidase, chloroplastic; K04122 ent-kaurene oxidase [EC:1.14.13.78] (A)	ko00904:Diterpenoid biosynthesis	[Q]	Secondary metabolites biosynthesis, transport and catabolism	Cytochrome P450;; MatE	Ent-kaurene oxidase, chloroplastic GN=T1N24.23 OS=Arabidopsis thaliana (Mouse-ear cress) PE=1 SV=2	Q	Secondary metabolites biosynthesis, transport and catabolism	PREDICTED: ent-kaurene oxidase, chloroplastic-like [Sesamum indicum]
[truncated: 86 more rows]

## Sheet: ko00909
File S3 The genes related to terpenoid biosynthesis
[truncated: 93 more rows]

[truncated: 3 more sheets: ko00130, ko00860, ko00100]
