# Supplementary material for: SMRT sequencing of full-length transcriptome and gene expression analysis in two chemical types of Pogostemon cablin (Blanco) Benth
Source: PeerJ. 2022 Feb 22;10:e12940. doi: 10.7717/peerj.12940 (PMC8877398; doi:10.7717/peerj.12940)
Supplement: Supplemental Information 4 [file peerj-10-12940-s004.xlsx]

## Sheet: IncRNA predict combine
File S4 IncRNA predict combine
#ID	cnci	cpat	cpc	pfam
F02_cb122_c1/f6p0/1630	NA	F02_cb122_c1/f6p0/1630	F02_cb122_c1/f6p0/1630	F02_cb122_c1/f6p0/1630
F01_cb16438_c3268/f1p0/3610	NA	F01_cb16438_c3268/f1p0/3610	NA	NA
F02_cb286_c15/f1p0/884	F02_cb286_c15/f1p0/884	F02_cb286_c15/f1p0/884	NA	NA
F02_cb15290_c437/f1p1/821	NA	F02_cb15290_c437/f1p1/821	NA	NA
F01_cb5185_c6/f1p0/2288	NA	NA	NA	F01_cb5185_c6/f1p0/2288
F01_cb2625_c1/f1p0/3614	NA	NA	NA	F01_cb2625_c1/f1p0/3614
F02_cb9194_c1/f3p0/1972	NA	F02_cb9194_c1/f3p0/1972	NA	NA
F01_cb1639_c53/f1p0/3346	NA	NA	NA	F01_cb1639_c53/f1p0/3346
F02_cb16713_c106/f2p0/1052	F02_cb16713_c106/f2p0/1052	F02_cb16713_c106/f2p0/1052	NA	F02_cb16713_c106/f2p0/1052
F01_cb933_c2/f1p0/3632	NA	NA	NA	F01_cb933_c2/f1p0/3632
F01_cb15067_c1/f1p0/1524	F01_cb15067_c1/f1p0/1524	F01_cb15067_c1/f1p0/1524	F01_cb15067_c1/f1p0/1524	F01_cb15067_c1/f1p0/1524
F02_cb15204_c3/f1p0/712	NA	F02_cb15204_c3/f1p0/712	NA	F02_cb15204_c3/f1p0/712
F01_cb21054_c1/f1p0/1143	NA	F01_cb21054_c1/f1p0/1143	NA	NA
F02_cb13568_c0/f1p0/1354	F02_cb13568_c0/f1p0/1354	F02_cb13568_c0/f1p0/1354	F02_cb13568_c0/f1p0/1354	F02_cb13568_c0/f1p0/1354
F01_cb16438_c35684/f1p0/2075	NA	NA	NA	F01_cb16438_c35684/f1p0/2075
F01_cb11271_c6/f1p1/3225	NA	F01_cb11271_c6/f1p1/3225	NA	NA
F01_cb16473_c2/f1p0/628	NA	NA	NA	F01_cb16473_c2/f1p0/628
F01_cb7363_c0/f1p0/2445	NA	NA	NA	F01_cb7363_c0/f1p0/2445
F01_cb18718_c1/f1p0/398	F01_cb18718_c1/f1p0/398	F01_cb18718_c1/f1p0/398	F01_cb18718_c1/f1p0/398	F01_cb18718_c1/f1p0/398
F01_cb14200_c3/f1p0/1086	NA	F01_cb14200_c3/f1p0/1086	NA	NA
F01_cb393_c6/f1p0/3991	NA	NA	NA	F01_cb393_c6/f1p0/3991
F02_cb1782_c0/f1p0/3647	NA	F02_cb1782_c0/f1p0/3647	NA	NA
F01_cb12224_c111/f1p0/2160	NA	F01_cb12224_c111/f1p0/2160	NA	F01_cb12224_c111/f1p0/2160
F01_cb16438_c43320/f1p0/1855	F01_cb16438_c43320/f1p0/1855	F01_cb16438_c43320/f1p0/1855	F01_cb16438_c43320/f1p0/1855	F01_cb16438_c43320/f1p0/1855
F01_cb19382_c5/f1p0/718	F01_cb19382_c5/f1p0/718	F01_cb19382_c5/f1p0/718	F01_cb19382_c5/f1p0/718	F01_cb19382_c5/f1p0/718
F01_cb14433_c0/f1p0/1347	NA	F01_cb14433_c0/f1p0/1347	NA	F01_cb14433_c0/f1p0/1347
F01_cb7986_c4/f2p0/2238	NA	F01_cb7986_c4/f2p0/2238	F01_cb7986_c4/f2p0/2238	F01_cb7986_c4/f2p0/2238
F01_cb7529_c3/f1p0/2288	NA	F01_cb7529_c3/f1p0/2288	NA	F01_cb7529_c3/f1p0/2288
F01_cb19996_c0/f1p0/798	F01_cb19996_c0/f1p0/798	F01_cb19996_c0/f1p0/798	F01_cb19996_c0/f1p0/798	F01_cb19996_c0/f1p0/798
F02_cb4620_c7/f1p0/3003	NA	F02_cb4620_c7/f1p0/3003	NA	NA
F02_cb16479_c0/f1p0/428	NA	F02_cb16479_c0/f1p0/428	NA	F02_cb16479_c0/f1p0/428
F01_cb7166_c8/f1p0/410	F01_cb7166_c8/f1p0/410	F01_cb7166_c8/f1p0/410	F01_cb7166_c8/f1p0/410	F01_cb7166_c8/f1p0/410
F02_cb11041_c53171/f2p6/2918	NA	NA	NA	F02_cb11041_c53171/f2p6/2918
F02_cb5910_c10/f1p2/1174	NA	NA	NA	F02_cb5910_c10/f1p2/1174
F02_cb1945_c13/f1p0/4710	NA	F02_cb1945_c13/f1p0/4710	NA	F02_cb1945_c13/f1p0/4710
F01_cb15086_c4/f1p0/765	NA	F01_cb15086_c4/f1p0/765	NA	NA
F02_cb10105_c3/f1p2/1947	NA	NA	NA	F02_cb10105_c3/f1p2/1947
F01_cb3206_c42/f1p0/2985	NA	F01_cb3206_c42/f1p0/2985	NA	NA
F01_cb17649_c4/f1p0/594	NA	NA	NA	F01_cb17649_c4/f1p0/594
F01_cb17437_c2/f1p0/574	NA	NA	NA	F01_cb17437_c2/f1p0/574
F02_cb19096_c0/f1p0/675	F02_cb19096_c0/f1p0/675	NA	NA	NA
F01_cb19411_c7/f1p0/1512	NA	F01_cb19411_c7/f1p0/1512	NA	F01_cb19411_c7/f1p0/1512
F02_cb16067_c2/f1p0/1221	F02_cb16067_c2/f1p0/1221	F02_cb16067_c2/f1p0/1221	F02_cb16067_c2/f1p0/1221	F02_cb16067_c2/f1p0/1221
F02_cb6422_c16/f1p0/2245	NA	F02_cb6422_c16/f1p0/2245	F02_cb6422_c16/f1p0/2245	F02_cb6422_c16/f1p0/2245
F01_cb16438_c19210/f1p0/2109	NA	NA	NA	F01_cb16438_c19210/f1p0/2109
F01_cb9575_c6/f1p0/2105	NA	NA	NA	F01_cb9575_c6/f1p0/2105
F01_cb12369_c2/f1p0/1727	NA	NA	NA	F01_cb12369_c2/f1p0/1727
F01_cb9638_c8/f1p0/2064	F01_cb9638_c8/f1p0/2064	F01_cb9638_c8/f1p0/2064	NA	NA
F01_cb10966_c10/f1p0/1686	NA	NA	NA	F01_cb10966_c10/f1p0/1686
F01_cb21954_c0/f1p0/1085	NA	NA	NA	F01_cb21954_c0/f1p0/1085
F02_cb7108_c0/f1p0/2340	NA	F02_cb7108_c0/f1p0/2340	NA	NA
F02_cb7323_c5/f1p0/1901	NA	F02_cb7323_c5/f1p0/1901	NA	NA
F01_cb4009_c4/f1p0/2632	NA	F01_cb4009_c4/f1p0/2632	NA	NA
F01_cb4577_c2/f2p0/3143	NA	NA	NA	F01_cb4577_c2/f2p0/3143
F01_cb11263_c0/f1p0/1895	NA	NA	NA	F01_cb11263_c0/f1p0/1895
F02_cb11041_c2429/f1p0/1701	NA	F02_cb11041_c2429/f1p0/1701	F02_cb11041_c2429/f1p0/1701	F02_cb11041_c2429/f1p0/1701
F02_cb5964_c10/f1p1/2334	NA	F02_cb5964_c10/f1p1/2334	NA	NA
F02_cb17804_c2/f1p0/520	NA	F02_cb17804_c2/f1p0/520	NA	NA
F02_cb11149_c0/f2p0/1862	F02_cb11149_c0/f2p0/1862	F02_cb11149_c0/f2p0/1862	F02_cb11149_c0/f2p0/1862	F02_cb11149_c0/f2p0/1862
F01_cb21688_c161/f1p0/526	F01_cb21688_c161/f1p0/526	F01_cb21688_c161/f1p0/526	F01_cb21688_c161/f1p0/526	F01_cb21688_c161/f1p0/526
F01_cb22253_c1/f1p0/869	NA	F01_cb22253_c1/f1p0/869	NA	F01_cb22253_c1/f1p0/869
F02_cb4084_c6/f1p0/2610	NA	NA	NA	F02_cb4084_c6/f1p0/2610
F01_cb20924_c20/f1p0/2243	NA	F01_cb20924_c20/f1p0/2243	NA	NA
F02_cb11041_c78246/f1p0/2893	F02_cb11041_c78246/f1p0/2893	F02_cb11041_c78246/f1p0/2893	NA	F02_cb11041_c78246/f1p0/2893
F01_cb8122_c4/f1p0/2227	NA	NA	NA	F01_cb8122_c4/f1p0/2227
F01_cb15685_c1/f1p0/988	NA	F01_cb15685_c1/f1p0/988	NA	F01_cb15685_c1/f1p0/988
F01_cb15499_c0/f1p0/1036	NA	F01_cb15499_c0/f1p0/1036	NA	NA
F01_cb6204_c9/f1p0/2820	NA	F01_cb6204_c9/f1p0/2820	NA	NA
F02_cb850_c70/f1p0/4727	NA	NA	NA	F02_cb850_c70/f1p0/4727
F02_cb11041_c4137/f1p0/4704	NA	NA	NA	F02_cb11041_c4137/f1p0/4704
F01_cb10022_c0/f1p0/2090	NA	F01_cb10022_c0/f1p0/2090	F01_cb10022_c0/f1p0/2090	F01_cb10022_c0/f1p0/2090
F01_cb16541_c0/f3p0/1393	NA	NA	NA	F01_cb16541_c0/f3p0/1393
F02_cb11746_c2/f1p0/1294	F02_cb11746_c2/f1p0/1294	F02_cb11746_c2/f1p0/1294	NA	NA
F02_cb11041_c62018/f1p1/1678	NA	F02_cb11041_c62018/f1p1/1678	F02_cb11041_c62018/f1p1/1678	NA
F01_cb11695_c7/f1p0/1747	NA	NA	NA	F01_cb11695_c7/f1p0/1747
F01_cb10578_c20/f1p0/351	F01_cb10578_c20/f1p0/351	F01_cb10578_c20/f1p0/351	NA	F01_cb10578_c20/f1p0/351
F01_cb20069_c2/f1p0/616	NA	F01_cb20069_c2/f1p0/616	NA	NA
F02_cb11041_c83402/f1p0/2382	NA	NA	NA	F02_cb11041_c83402/f1p0/2382
F02_cb13928_c5/f1p0/487	F02_cb13928_c5/f1p0/487	F02_cb13928_c5/f1p0/487	F02_cb13928_c5/f1p0/487	F02_cb13928_c5/f1p0/487
F01_cb18816_c2/f1p0/338	F01_cb18816_c2/f1p0/338	F01_cb18816_c2/f1p0/338	F01_cb18816_c2/f1p0/338	NA
F01_cb12443_c26/f1p0/790	NA	NA	NA	F01_cb12443_c26/f1p0/790
F01_cb13634_c11/f1p0/1291	NA	F01_cb13634_c11/f1p0/1291	NA	NA
F01_cb19160_c28/f1p0/1029	F01_cb19160_c28/f1p0/1029	F01_cb19160_c28/f1p0/1029	F01_cb19160_c28/f1p0/1029	F01_cb19160_c28/f1p0/1029
F01_cb21838_c1/f1p0/999	NA	F01_cb21838_c1/f1p0/999	F01_cb21838_c1/f1p0/999	F01_cb21838_c1/f1p0/999
F01_cb15678_c2/f2p0/1053	NA	NA	F01_cb15678_c2/f2p0/1053	F01_cb15678_c2/f2p0/1053
F01_cb17114_c34/f1p0/1157	NA	NA	F01_cb17114_c34/f1p0/1157	F01_cb17114_c34/f1p0/1157
F01_cb16438_c3923/f1p0/2153	F01_cb16438_c3923/f1p0/2153	F01_cb16438_c3923/f1p0/2153	NA	NA
F01_cb3431_c0/f1p0/3189	NA	F01_cb3431_c0/f1p0/3189	NA	NA
F02_cb16454_c0/f2p0/726	F02_cb16454_c0/f2p0/726	F02_cb16454_c0/f2p0/726	NA	NA
F02_cb16980_c4/f1p0/530	F02_cb16980_c4/f1p0/530	F02_cb16980_c4/f1p0/530	NA	NA
F01_cb5489_c0/f1p0/2757	NA	NA	NA	F01_cb5489_c0/f1p0/2757
F02_cb13410_c19/f1p0/1608	NA	NA	F02_cb13410_c19/f1p0/1608	F02_cb13410_c19/f1p0/1608
F02_cb3511_c9/f1p0/2162	F02_cb3511_c9/f1p0/2162	F02_cb3511_c9/f1p0/2162	F02_cb3511_c9/f1p0/2162	F02_cb3511_c9/f1p0/2162
F01_cb16438_c39242/f1p0/2127	NA	F01_cb16438_c39242/f1p0/2127	NA	F01_cb16438_c39242/f1p0/2127
F01_cb11033_c0/f1p0/1927	NA	F01_cb11033_c0/f1p0/1927	F01_cb11033_c0/f1p0/1927	NA
F02_cb7623_c0/f1p0/2343	NA	F02_cb7623_c0/f1p0/2343	NA	F02_cb7623_c0/f1p0/2343
F01_cb10160_c1/f1p0/2563	NA	NA	NA	F01_cb10160_c1/f1p0/2563
F01_cb20562_c3/f1p0/582	NA	F01_cb20562_c3/f1p0/582	NA	NA
F01_cb19496_c101/f12p2/832	NA	NA	NA	F01_cb19496_c101/f12p2/832
F01_cb19515_c0/f1p0/728	F01_cb19515_c0/f1p0/728	NA	F01_cb19515_c0/f1p0/728	NA
F02_cb18589_c0/f3p0/552	F02_cb18589_c0/f3p0/552	F02_cb18589_c0/f3p0/552	F02_cb18589_c0/f3p0/552	F02_cb18589_c0/f3p0/552
F01_cb9809_c1/f2p0/1956	NA	F01_cb9809_c1/f2p0/1956	NA	NA
F01_cb13775_c1/f1p0/1760	NA	F01_cb13775_c1/f1p0/1760	NA	NA
F02_cb4432_c1/f1p1/2792	NA	F02_cb4432_c1/f1p1/2792	NA	NA
F02_cb17466_c0/f3p0/440	F02_cb17466_c0/f3p0/440	F02_cb17466_c0/f3p0/440	F02_cb17466_c0/f3p0/440	F02_cb17466_c0/f3p0/440
F02_cb11317_c34/f1p0/2366	NA	NA	NA	F02_cb11317_c34/f1p0/2366
F01_cb3407_c16/f1p0/2885	NA	F01_cb3407_c16/f1p0/2885	NA	NA
F01_cb11449_c12/f1p0/847	NA	F01_cb11449_c12/f1p0/847	NA	NA
F02_cb11041_c616/f4p1/2213	NA	F02_cb11041_c616/f4p1/2213	F02_cb11041_c616/f4p1/2213	F02_cb11041_c616/f4p1/2213
F01_cb8989_c5/f1p0/2298	NA	NA	NA	F01_cb8989_c5/f1p0/2298
F02_cb12262_c1/f1p0/1647	NA	NA	NA	F02_cb12262_c1/f1p0/1647
F01_cb19275_c0/f11p0/396	F01_cb19275_c0/f11p0/396	F01_cb19275_c0/f11p0/396	F01_cb19275_c0/f11p0/396	F01_cb19275_c0/f11p0/396
F02_cb12343_c0/f2p0/1648	NA	NA	NA	F02_cb12343_c0/f2p0/1648
F01_cb18757_c0/f1p0/718	F01_cb18757_c0/f1p0/718	F01_cb18757_c0/f1p0/718	F01_cb18757_c0/f1p0/718	F01_cb18757_c0/f1p0/718
F01_cb15764_c0/f2p0/1186	F01_cb15764_c0/f2p0/1186	NA	F01_cb15764_c0/f2p0/1186	F01_cb15764_c0/f2p0/1186
F02_cb15999_c0/f3p0/378	F02_cb15999_c0/f3p0/378	F02_cb15999_c0/f3p0/378	F02_cb15999_c0/f3p0/378	NA
F01_cb18516_c4/f1p1/449	F01_cb18516_c4/f1p1/449	F01_cb18516_c4/f1p1/449	F01_cb18516_c4/f1p1/449	F01_cb18516_c4/f1p1/449
F01_cb18979_c14/f1p0/1023	F01_cb18979_c14/f1p0/1023	F01_cb18979_c14/f1p0/1023	NA	NA
F02_cb19183_c1/f1p0/944	NA	NA	NA	F02_cb19183_c1/f1p0/944
F02_cb2967_c7/f1p1/3355	NA	NA	NA	F02_cb2967_c7/f1p1/3355
F01_cb19777_c4/f1p0/666	F01_cb19777_c4/f1p0/666	F01_cb19777_c4/f1p0/666	F01_cb19777_c4/f1p0/666	F01_cb19777_c4/f1p0/666
F01_cb12536_c0/f1p0/1703	F01_cb12536_c0/f1p0/1703	F01_cb12536_c0/f1p0/1703	NA	F01_cb12536_c0/f1p0/1703
F01_cb14074_c0/f2p0/731	NA	NA	NA	F01_cb14074_c0/f2p0/731
F02_cb18740_c3/f1p0/769	NA	F02_cb18740_c3/f1p0/769	NA	NA
F01_cb10372_c28/f1p1/1846	F01_cb10372_c28/f1p1/1846	F01_cb10372_c28/f1p1/1846	F01_cb10372_c28/f1p1/1846	F01_cb10372_c28/f1p1/1846
F02_cb7037_c1/f1p0/2052	NA	F02_cb7037_c1/f1p0/2052	NA	NA
F01_cb16009_c0/f7p0/590	NA	NA	NA	F01_cb16009_c0/f7p0/590
F01_cb22225_c0/f1p0/4755	F01_cb22225_c0/f1p0/4755	F01_cb22225_c0/f1p0/4755	F01_cb22225_c0/f1p0/4755	NA
F01_cb16438_c43862/f1p0/3714	F01_cb16438_c43862/f1p0/3714	F01_cb16438_c43862/f1p0/3714	NA	F01_cb16438_c43862/f1p0/3714
F01_cb7880_c17/f1p0/2260	NA	NA	NA	F01_cb7880_c17/f1p0/2260
F01_cb1769_c14/f1p0/2512	NA	F01_cb1769_c14/f1p0/2512	F01_cb1769_c14/f1p0/2512	F01_cb1769_c14/f1p0/2512
F02_cb15290_c639/f1p0/469	F02_cb15290_c639/f1p0/469	F02_cb15290_c639/f1p0/469	NA	F02_cb15290_c639/f1p0/469
F01_cb9152_c0/f3p0/2170	NA	NA	NA	F01_cb9152_c0/f3p0/2170
F02_cb4607_c1/f1p0/2830	NA	NA	NA	F02_cb4607_c1/f1p0/2830
F02_cb14631_c1/f1p0/2409	NA	NA	NA	F02_cb14631_c1/f1p0/2409
F01_cb11787_c12/f2p0/1726	NA	NA	NA	F01_cb11787_c12/f2p0/1726
F01_cb14677_c2/f1p0/930	F01_cb14677_c2/f1p0/930	F01_cb14677_c2/f1p0/930	F01_cb14677_c2/f1p0/930	F01_cb14677_c2/f1p0/930
F02_cb14711_c1/f1p0/1592	NA	NA	NA	F02_cb14711_c1/f1p0/1592
F01_cb17934_c0/f3p0/682	NA	NA	F01_cb17934_c0/f3p0/682	NA
F02_cb11041_c51568/f1p0/2577	F02_cb11041_c51568/f1p0/2577	F02_cb11041_c51568/f1p0/2577	F02_cb11041_c51568/f1p0/2577	F02_cb11041_c51568/f1p0/2577
F02_cb9999_c2/f1p1/1967	NA	NA	NA	F02_cb9999_c2/f1p1/1967
F02_cb9026_c0/f1p0/2145	NA	NA	NA	F02_cb9026_c0/f1p0/2145
F01_cb6233_c28/f1p0/2514	NA	NA	NA	F01_cb6233_c28/f1p0/2514
F01_cb3592_c4/f1p0/3152	NA	NA	NA	F01_cb3592_c4/f1p0/3152
F02_cb5822_c15/f1p0/2895	NA	F02_cb5822_c15/f1p0/2895	NA	F02_cb5822_c15/f1p0/2895
F02_cb11041_c74081/f3p0/2104	F02_cb11041_c74081/f3p0/2104	F02_cb11041_c74081/f3p0/2104	F02_cb11041_c74081/f3p0/2104	NA
F01_cb7699_c28/f1p0/3175	NA	NA	NA	F01_cb7699_c28/f1p0/3175
F01_cb19546_c8/f1p0/1321	NA	F01_cb19546_c8/f1p0/1321	NA	NA
F01_cb16490_c3/f1p0/1037	F01_cb16490_c3/f1p0/1037	F01_cb16490_c3/f1p0/1037	NA	NA
F02_cb14622_c1/f1p0/1438	F02_cb14622_c1/f1p0/1438	F02_cb14622_c1/f1p0/1438	F02_cb14622_c1/f1p0/1438	F02_cb14622_c1/f1p0/1438
F02_cb19061_c1/f1p0/329	F02_cb19061_c1/f1p0/329	F02_cb19061_c1/f1p0/329	F02_cb19061_c1/f1p0/329	F02_cb19061_c1/f1p0/329
F02_cb11041_c41540/f1p0/2973	NA	F02_cb11041_c41540/f1p0/2973	NA	NA
F01_cb16438_c38042/f1p0/2409	NA	F01_cb16438_c38042/f1p0/2409	NA	F01_cb16438_c38042/f1p0/2409
F02_cb19333_c0/f2p0/1032	NA	F02_cb19333_c0/f2p0/1032	F02_cb19333_c0/f2p0/1032	F02_cb19333_c0/f2p0/1032
F02_cb19633_c1/f1p0/788	NA	F02_cb19633_c1/f1p0/788	NA	F02_cb19633_c1/f1p0/788
F01_cb10699_c3/f1p0/1459	NA	NA	F01_cb10699_c3/f1p0/1459	F01_cb10699_c3/f1p0/1459
F01_cb17674_c2/f1p0/821	NA	F01_cb17674_c2/f1p0/821	F01_cb17674_c2/f1p0/821	F01_cb17674_c2/f1p0/821
F01_cb18388_c3/f1p1/725	NA	NA	F01_cb18388_c3/f1p1/725	F01_cb18388_c3/f1p1/725
F01_cb13460_c4/f1p0/1451	F01_cb13460_c4/f1p0/1451	F01_cb13460_c4/f1p0/1451	NA	F01_cb13460_c4/f1p0/1451
F02_cb10007_c2/f1p0/1235	NA	F02_cb10007_c2/f1p0/1235	NA	NA
F01_cb16438_c40574/f1p0/1808	NA	NA	NA	F01_cb16438_c40574/f1p0/1808
F01_cb9410_c11/f1p0/2150	NA	F01_cb9410_c11/f1p0/2150	NA	NA
F01_cb4061_c16/f1p0/1888	NA	F01_cb4061_c16/f1p0/1888	NA	NA
F02_cb5575_c4/f1p0/959	NA	NA	NA	F02_cb5575_c4/f1p0/959
F02_cb11041_c40892/f1p1/1840	NA	F02_cb11041_c40892/f1p1/1840	NA	NA
F02_cb17661_c3/f1p0/639	NA	F02_cb17661_c3/f1p0/639	NA	NA
F02_cb16346_c4/f1p0/510	NA	F02_cb16346_c4/f1p0/510	NA	F02_cb16346_c4/f1p0/510
F02_cb9723_c2/f1p0/1035	F02_cb9723_c2/f1p0/1035	F02_cb9723_c2/f1p0/1035	F02_cb9723_c2/f1p0/1035	F02_cb9723_c2/f1p0/1035
F01_cb13683_c0/f1p0/1460	NA	F01_cb13683_c0/f1p0/1460	NA	NA
F02_cb10421_c3/f1p0/1756	NA	NA	NA	F02_cb10421_c3/f1p0/1756
F01_cb19652_c0/f2p1/941	NA	NA	F01_cb19652_c0/f2p1/941	NA
F01_cb8069_c6/f1p0/1770	NA	NA	NA	F01_cb8069_c6/f1p0/1770
F01_cb4476_c12/f1p0/504	F01_cb4476_c12/f1p0/504	F01_cb4476_c12/f1p0/504	NA	F01_cb4476_c12/f1p0/504
F01_cb19675_c0/f8p2/1203	NA	NA	NA	F01_cb19675_c0/f8p2/1203
F02_cb18788_c1/f1p0/729	NA	NA	NA	F02_cb18788_c1/f1p0/729
F01_cb2443_c4/f1p0/3452	NA	F01_cb2443_c4/f1p0/3452	NA	NA
F01_cb19808_c42/f1p0/395	F01_cb19808_c42/f1p0/395	F01_cb19808_c42/f1p0/395	NA	F01_cb19808_c42/f1p0/395
F02_cb12706_c2/f1p0/1935	NA	NA	NA	F02_cb12706_c2/f1p0/1935
F01_cb14028_c3/f1p0/453	F01_cb14028_c3/f1p0/453	F01_cb14028_c3/f1p0/453	F01_cb14028_c3/f1p0/453	F01_cb14028_c3/f1p0/453
F02_cb18547_c2/f1p0/620	NA	NA	NA	F02_cb18547_c2/f1p0/620
F01_cb16438_c22695/f1p0/1676	NA	NA	NA	F01_cb16438_c22695/f1p0/1676
F01_cb11326_c1/f1p0/1667	F01_cb11326_c1/f1p0/1667	F01_cb11326_c1/f1p0/1667	NA	NA
F01_cb3234_c20/f1p0/1752	NA	NA	NA	F01_cb3234_c20/f1p0/1752
F02_cb4549_c8/f1p0/590	NA	F02_cb4549_c8/f1p0/590	F02_cb4549_c8/f1p0/590	F02_cb4549_c8/f1p0/590
F02_cb10508_c0/f2p1/1055	NA	F02_cb10508_c0/f2p1/1055	NA	NA
F01_cb16438_c44541/f1p0/1967	NA	F01_cb16438_c44541/f1p0/1967	NA	NA
F02_cb11367_c1/f1p0/2363	NA	NA	F02_cb11367_c1/f1p0/2363	F02_cb11367_c1/f1p0/2363
F01_cb12188_c0/f1p0/1763	NA	NA	NA	F01_cb12188_c0/f1p0/1763
F01_cb3101_c62/f1p0/1619	F01_cb3101_c62/f1p0/1619	F01_cb3101_c62/f1p0/1619	NA	F01_cb3101_c62/f1p0/1619
F01_cb9969_c5/f1p1/1541	NA	F01_cb9969_c5/f1p1/1541	NA	NA
F01_cb5475_c5/f1p0/1398	NA	NA	NA	F01_cb5475_c5/f1p0/1398
F01_cb18547_c0/f1p0/442	F01_cb18547_c0/f1p0/442	F01_cb18547_c0/f1p0/442	NA	NA
F01_cb4406_c1/f1p0/3054	NA	NA	F01_cb4406_c1/f1p0/3054	NA
F02_cb10478_c38/f1p0/3138	F02_cb10478_c38/f1p0/3138	F02_cb10478_c38/f1p0/3138	F02_cb10478_c38/f1p0/3138	NA
F02_cb6317_c1/f1p0/2402	NA	NA	NA	F02_cb6317_c1/f1p0/2402
F01_cb14968_c14/f1p1/876	F01_cb14968_c14/f1p1/876	F01_cb14968_c14/f1p1/876	F01_cb14968_c14/f1p1/876	F01_cb14968_c14/f1p1/876
F02_cb13112_c2/f1p0/1159	NA	F02_cb13112_c2/f1p0/1159	NA	NA
F01_cb20114_c1/f1p0/1034	NA	F01_cb20114_c1/f1p0/1034	F01_cb20114_c1/f1p0/1034	F01_cb20114_c1/f1p0/1034
F01_cb18344_c0/f2p0/951	NA	NA	NA	F01_cb18344_c0/f2p0/951
F02_cb11041_c78956/f1p0/1940	NA	NA	NA	F02_cb11041_c78956/f1p0/1940
F01_cb13101_c0/f2p0/1055	F01_cb13101_c0/f2p0/1055	F01_cb13101_c0/f2p0/1055	F01_cb13101_c0/f2p0/1055	F01_cb13101_c0/f2p0/1055
F02_cb19266_c179/f1p0/1224	F02_cb19266_c179/f1p0/1224	F02_cb19266_c179/f1p0/1224	F02_cb19266_c179/f1p0/1224	F02_cb19266_c179/f1p0/1224
F02_cb5174_c9/f1p0/2210	NA	NA	NA	F02_cb5174_c9/f1p0/2210
F01_cb676_c7/f1p0/3153	NA	F01_cb676_c7/f1p0/3153	NA	F01_cb676_c7/f1p0/3153
F01_cb4271_c8/f1p0/2754	F01_cb4271_c8/f1p0/2754	F01_cb4271_c8/f1p0/2754	F01_cb4271_c8/f1p0/2754	F01_cb4271_c8/f1p0/2754
F02_cb5492_c10/f1p0/2164	NA	F02_cb5492_c10/f1p0/2164	NA	NA
F01_cb20411_c0/f1p0/673	F01_cb20411_c0/f1p0/673	F01_cb20411_c0/f1p0/673	F01_cb20411_c0/f1p0/673	F01_cb20411_c0/f1p0/673
F02_cb6244_c18/f1p0/2589	NA	F02_cb6244_c18/f1p0/2589	NA	F02_cb6244_c18/f1p0/2589
F02_cb11041_c12258/f1p2/2564	NA	F02_cb11041_c12258/f1p2/2564	F02_cb11041_c12258/f1p2/2564	NA
F01_cb8021_c0/f11p1/803	NA	NA	NA	F01_cb8021_c0/f11p1/803
F01_cb20321_c0/f1p0/880	F01_cb20321_c0/f1p0/880	F01_cb20321_c0/f1p0/880	F01_cb20321_c0/f1p0/880	F01_cb20321_c0/f1p0/880
F02_cb2897_c2/f1p0/3153	NA	NA	NA	F02_cb2897_c2/f1p0/3153
F02_cb11521_c2/f2p0/1393	NA	NA	NA	F02_cb11521_c2/f2p0/1393
F02_cb19422_c0/f1p0/416	NA	F02_cb19422_c0/f1p0/416	F02_cb19422_c0/f1p0/416	F02_cb19422_c0/f1p0/416
F02_cb6924_c0/f1p0/2454	NA	F02_cb6924_c0/f1p0/2454	NA	F02_cb6924_c0/f1p0/2454
F01_cb5164_c3/f1p0/2282	F01_cb5164_c3/f1p0/2282	F01_cb5164_c3/f1p0/2282	NA	NA
F02_cb9480_c0/f2p0/1801	F02_cb9480_c0/f2p0/1801	F02_cb9480_c0/f2p0/1801	F02_cb9480_c0/f2p0/1801	F02_cb9480_c0/f2p0/1801
F02_cb11041_c3877/f1p0/2435	F02_cb11041_c3877/f1p0/2435	F02_cb11041_c3877/f1p0/2435	F02_cb11041_c3877/f1p0/2435	F02_cb11041_c3877/f1p0/2435
F01_cb12890_c8/f1p0/1690	NA	F01_cb12890_c8/f1p0/1690	NA	NA
F01_cb4825_c7/f1p0/1921	F01_cb4825_c7/f1p0/1921	F01_cb4825_c7/f1p0/1921	F01_cb4825_c7/f1p0/1921	NA
F02_cb7658_c46/f1p0/2104	NA	NA	NA	F02_cb7658_c46/f1p0/2104
F02_cb11041_c49923/f1p1/2357	NA	F02_cb11041_c49923/f1p1/2357	F02_cb11041_c49923/f1p1/2357	F02_cb11041_c49923/f1p1/2357
F02_cb13376_c3/f1p0/311	F02_cb13376_c3/f1p0/311	F02_cb13376_c3/f1p0/311	F02_cb13376_c3/f1p0/311	F02_cb13376_c3/f1p0/311
F01_cb16438_c2413/f1p0/2062	NA	F01_cb16438_c2413/f1p0/2062	F01_cb16438_c2413/f1p0/2062	NA
F01_cb13562_c2/f1p0/1714	NA	F01_cb13562_c2/f1p0/1714	NA	NA
F02_cb14954_c1/f1p0/1697	NA	NA	NA	F02_cb14954_c1/f1p0/1697
F01_cb3523_c4/f1p0/867	NA	F01_cb3523_c4/f1p0/867	F01_cb3523_c4/f1p0/867	NA
F01_cb19510_c0/f2p0/578	NA	NA	NA	F01_cb19510_c0/f2p0/578
F01_cb16505_c4/f1p1/709	NA	F01_cb16505_c4/f1p1/709	NA	NA
F02_cb11041_c86497/f1p0/3245	NA	F02_cb11041_c86497/f1p0/3245	NA	NA
F01_cb12586_c0/f3p0/1605	NA	F01_cb12586_c0/f3p0/1605	NA	NA
F02_cb9835_c2/f1p0/1032	F02_cb9835_c2/f1p0/1032	F02_cb9835_c2/f1p0/1032	F02_cb9835_c2/f1p0/1032	F02_cb9835_c2/f1p0/1032
F01_cb3231_c5/f1p0/2189	NA	NA	NA	F01_cb3231_c5/f1p0/2189
F02_cb11105_c3/f1p0/1641	NA	NA	NA	F02_cb11105_c3/f1p0/1641
F01_cb4350_c2/f1p0/1844	NA	F01_cb4350_c2/f1p0/1844	NA	NA
F02_cb15304_c4/f1p0/1210	F02_cb15304_c4/f1p0/1210	NA	NA	NA
F02_cb18792_c0/f3p0/1240	NA	NA	NA	F02_cb18792_c0/f3p0/1240
F01_cb1831_c6/f1p1/1876	NA	NA	NA	F01_cb1831_c6/f1p1/1876
F01_cb17986_c2/f1p0/506	F01_cb17986_c2/f1p0/506	F01_cb17986_c2/f1p0/506	NA	F01_cb17986_c2/f1p0/506
F02_cb14456_c1/f1p0/1444	NA	F02_cb14456_c1/f1p0/1444	F02_cb14456_c1/f1p0/1444	F02_cb14456_c1/f1p0/1444
F01_cb7531_c3/f1p0/546	NA	F01_cb7531_c3/f1p0/546	NA	F01_cb7531_c3/f1p0/546
F01_cb19496_c366/f1p0/1002	NA	F01_cb19496_c366/f1p0/1002	NA	NA
F02_cb17903_c0/f2p0/700	NA	F02_cb17903_c0/f2p0/700	NA	NA
F02_cb5938_c3/f1p0/1463	NA	NA	NA	F02_cb5938_c3/f1p0/1463
F01_cb5553_c0/f2p0/1709	NA	NA	NA	F01_cb5553_c0/f2p0/1709
F01_cb12268_c6/f1p0/854	NA	NA	NA	F01_cb12268_c6/f1p0/854
F01_cb13288_c7/f1p0/1004	F01_cb13288_c7/f1p0/1004	NA	NA	F01_cb13288_c7/f1p0/1004
F02_cb16187_c2/f1p0/749	NA	F02_cb16187_c2/f1p0/749	F02_cb16187_c2/f1p0/749	F02_cb16187_c2/f1p0/749
F02_cb16713_c246/f1p0/979	NA	F02_cb16713_c246/f1p0/979	F02_cb16713_c246/f1p0/979	F02_cb16713_c246/f1p0/979
F01_cb1841_c13/f1p0/694	NA	NA	F01_cb1841_c13/f1p0/694	NA
F01_cb19015_c5/f1p0/687	NA	NA	F01_cb19015_c5/f1p0/687	F01_cb19015_c5/f1p0/687
F01_cb9339_c15/f1p0/2166	NA	F01_cb9339_c15/f1p0/2166	NA	F01_cb9339_c15/f1p0/2166
F01_cb19563_c0/f1p0/1000	F01_cb19563_c0/f1p0/1000	F01_cb19563_c0/f1p0/1000	F01_cb19563_c0/f1p0/1000	F01_cb19563_c0/f1p0/1000
F01_cb19682_c1497/f1p0/1534	NA	NA	NA	F01_cb19682_c1497/f1p0/1534
F01_cb19929_c0/f1p0/641	NA	F01_cb19929_c0/f1p0/641	F01_cb19929_c0/f1p0/641	F01_cb19929_c0/f1p0/641
F02_cb10968_c4/f1p0/1751	NA	NA	NA	F02_cb10968_c4/f1p0/1751
F02_cb2752_c3/f1p0/2305	NA	NA	NA	F02_cb2752_c3/f1p0/2305
F02_cb11041_c2969/f1p0/2033	NA	F02_cb11041_c2969/f1p0/2033	F02_cb11041_c2969/f1p0/2033	F02_cb11041_c2969/f1p0/2033
F01_cb14049_c5/f1p0/910	NA	F01_cb14049_c5/f1p0/910	NA	NA
F01_cb19682_c1726/f1p0/852	NA	F01_cb19682_c1726/f1p0/852	NA	F01_cb19682_c1726/f1p0/852
F01_cb5695_c5/f1p0/2212	NA	F01_cb5695_c5/f1p0/2212	NA	NA
F01_cb18218_c1/f1p0/359	NA	F01_cb18218_c1/f1p0/359	F01_cb18218_c1/f1p0/359	F01_cb18218_c1/f1p0/359
F02_cb16844_c3/f1p0/1017	NA	NA	F02_cb16844_c3/f1p0/1017	NA
F02_cb1098_c13/f1p0/2292	F02_cb1098_c13/f1p0/2292	F02_cb1098_c13/f1p0/2292	NA	NA
F01_cb13116_c16/f1p0/948	NA	NA	NA	F01_cb13116_c16/f1p0/948
F01_cb12894_c7/f1p0/1761	NA	F01_cb12894_c7/f1p0/1761	NA	NA
F01_cb15568_c9/f1p1/1379	NA	F01_cb15568_c9/f1p1/1379	NA	NA
F01_cb4730_c18/f1p0/1183	NA	NA	NA	F01_cb4730_c18/f1p0/1183
F01_cb17594_c1/f2p0/618	F01_cb17594_c1/f2p0/618	F01_cb17594_c1/f2p0/618	NA	NA
F01_cb13285_c2/f1p0/912	NA	F01_cb13285_c2/f1p0/912	F01_cb13285_c2/f1p0/912	F01_cb13285_c2/f1p0/912
F02_cb11041_c2943/f1p0/2606	NA	NA	NA	F02_cb11041_c2943/f1p0/2606
F01_cb16438_c10623/f1p0/2578	NA	F01_cb16438_c10623/f1p0/2578	NA	F01_cb16438_c10623/f1p0/2578
F02_cb18391_c0/f1p0/779	NA	F02_cb18391_c0/f1p0/779	F02_cb18391_c0/f1p0/779	NA
F01_cb1764_c16/f1p0/2615	NA	F01_cb1764_c16/f1p0/2615	NA	F01_cb1764_c16/f1p0/2615
F02_cb18964_c0/f2p0/876	NA	NA	NA	F02_cb18964_c0/f2p0/876
F01_cb15723_c4/f1p0/547	NA	NA	F01_cb15723_c4/f1p0/547	F01_cb15723_c4/f1p0/547
F01_cb2317_c7/f1p0/3726	NA	NA	NA	F01_cb2317_c7/f1p0/3726
F01_cb12876_c2/f1p0/867	NA	F01_cb12876_c2/f1p0/867	NA	NA
F01_cb9223_c0/f2p0/2619	NA	F01_cb9223_c0/f2p0/2619	NA	NA
F01_cb7234_c5/f1p0/2676	F01_cb7234_c5/f1p0/2676	F01_cb7234_c5/f1p0/2676	F01_cb7234_c5/f1p0/2676	F01_cb7234_c5/f1p0/2676
F01_cb11522_c3/f1p0/1484	F01_cb11522_c3/f1p0/1484	F01_cb11522_c3/f1p0/1484	F01_cb11522_c3/f1p0/1484	F01_cb11522_c3/f1p0/1484
F01_cb12262_c2/f1p0/1738	NA	F01_cb12262_c2/f1p0/1738	F01_cb12262_c2/f1p0/1738	F01_cb12262_c2/f1p0/1738
F02_cb11041_c82028/f1p0/2135	F02_cb11041_c82028/f1p0/2135	F02_cb11041_c82028/f1p0/2135	F02_cb11041_c82028/f1p0/2135	F02_cb11041_c82028/f1p0/2135
F01_cb16438_c2708/f1p0/2428	NA	NA	NA	F01_cb16438_c2708/f1p0/2428
F02_cb8158_c4/f1p0/1949	NA	F02_cb8158_c4/f1p0/1949	NA	NA
F01_cb16353_c0/f2p0/1456	NA	NA	NA	F01_cb16353_c0/f2p0/1456
F01_cb9439_c1/f1p0/2152	NA	NA	NA	F01_cb9439_c1/f1p0/2152
F01_cb16597_c3/f1p1/1469	NA	NA	NA	F01_cb16597_c3/f1p1/1469
F02_cb15638_c1/f3p0/395	NA	F02_cb15638_c1/f3p0/395	F02_cb15638_c1/f3p0/395	NA
F01_cb16731_c2/f1p1/430	F01_cb16731_c2/f1p1/430	F01_cb16731_c2/f1p1/430	NA	F01_cb16731_c2/f1p1/430
F01_cb19892_c0/f2p0/462	F01_cb19892_c0/f2p0/462	F01_cb19892_c0/f2p0/462	F01_cb19892_c0/f2p0/462	F01_cb19892_c0/f2p0/462
F01_cb9715_c2/f1p0/2108	F01_cb9715_c2/f1p0/2108	F01_cb9715_c2/f1p0/2108	NA	NA
F02_cb4533_c4/f1p1/2780	NA	NA	NA	F02_cb4533_c4/f1p1/2780
F02_cb2498_c8/f1p0/3261	NA	F02_cb2498_c8/f1p0/3261	NA	NA
F01_cb6116_c6/f1p0/1720	NA	F01_cb6116_c6/f1p0/1720	NA	F01_cb6116_c6/f1p0/1720
F01_cb2111_c20/f1p0/1603	NA	F01_cb2111_c20/f1p0/1603	NA	F01_cb2111_c20/f1p0/1603
F02_cb2195_c6/f1p0/2281	F02_cb2195_c6/f1p0/2281	F02_cb2195_c6/f1p0/2281	NA	F02_cb2195_c6/f1p0/2281
F02_cb11041_c57101/f1p1/1766	NA	F02_cb11041_c57101/f1p1/1766	F02_cb11041_c57101/f1p1/1766	NA
F02_cb16857_c1/f1p0/876	F02_cb16857_c1/f1p0/876	F02_cb16857_c1/f1p0/876	F02_cb16857_c1/f1p0/876	F02_cb16857_c1/f1p0/876
F02_cb13094_c5/f1p0/2384	NA	F02_cb13094_c5/f1p0/2384	NA	F02_cb13094_c5/f1p0/2384
F01_cb19273_c2/f1p0/1030	NA	F01_cb19273_c2/f1p0/1030	NA	NA
F01_cb1483_c2/f2p0/3309	NA	NA	NA	F01_cb1483_c2/f2p0/3309
F01_cb14074_c2/f1p0/2021	F01_cb14074_c2/f1p0/2021	F01_cb14074_c2/f1p0/2021	NA	F01_cb14074_c2/f1p0/2021
F02_cb11041_c81517/f1p0/1863	F02_cb11041_c81517/f1p0/1863	F02_cb11041_c81517/f1p0/1863	NA	F02_cb11041_c81517/f1p0/1863
F01_cb6345_c0/f1p0/2614	NA	F01_cb6345_c0/f1p0/2614	F01_cb6345_c0/f1p0/2614	F01_cb6345_c0/f1p0/2614
F02_cb11011_c0/f1p0/1859	NA	NA	NA	F02_cb11011_c0/f1p0/1859
F02_cb8674_c6/f1p0/3751	NA	NA	NA	F02_cb8674_c6/f1p0/3751
F01_cb19888_c4/f1p1/505	F01_cb19888_c4/f1p1/505	F01_cb19888_c4/f1p1/505	F01_cb19888_c4/f1p1/505	F01_cb19888_c4/f1p1/505
F01_cb15368_c23/f1p0/586	NA	F01_cb15368_c23/f1p0/586	NA	F01_cb15368_c23/f1p0/586
F01_cb20697_c0/f6p0/1419	NA	F01_cb20697_c0/f6p0/1419	NA	F01_cb20697_c0/f6p0/1419
F01_cb1477_c4/f1p0/2037	NA	NA	NA	F01_cb1477_c4/f1p0/2037
F01_cb10110_c2/f1p0/1829	NA	F01_cb10110_c2/f1p0/1829	NA	F01_cb10110_c2/f1p0/1829
F02_cb3730_c10/f1p0/1668	NA	NA	NA	F02_cb3730_c10/f1p0/1668
F01_cb21557_c0/f2p0/431	F01_cb21557_c0/f2p0/431	F01_cb21557_c0/f2p0/431	F01_cb21557_c0/f2p0/431	F01_cb21557_c0/f2p0/431
F02_cb11041_c87268/f1p0/1802	NA	F02_cb11041_c87268/f1p0/1802	NA	NA
F01_cb14879_c0/f2p0/1271	NA	NA	NA	F01_cb14879_c0/f2p0/1271
F01_cb19480_c8/f1p0/677	NA	F01_cb19480_c8/f1p0/677	NA	NA
F01_cb7642_c7/f1p0/2237	NA	NA	NA	F01_cb7642_c7/f1p0/2237
F02_cb1026_c13/f1p0/3772	NA	NA	NA	F02_cb1026_c13/f1p0/3772
F01_cb11068_c1/f1p0/2596	NA	F01_cb11068_c1/f1p0/2596	F01_cb11068_c1/f1p0/2596	F01_cb11068_c1/f1p0/2596
F02_cb11041_c43327/f1p0/2674	NA	F02_cb11041_c43327/f1p0/2674	NA	F02_cb11041_c43327/f1p0/2674
F02_cb13591_c5/f1p0/341	F02_cb13591_c5/f1p0/341	F02_cb13591_c5/f1p0/341	F02_cb13591_c5/f1p0/341	F02_cb13591_c5/f1p0/341
F01_cb16567_c1/f1p0/648	NA	NA	NA	F01_cb16567_c1/f1p0/648
F02_cb4433_c25/f1p0/2698	NA	NA	NA	F02_cb4433_c25/f1p0/2698
F02_cb14189_c3/f1p0/570	F02_cb14189_c3/f1p0/570	F02_cb14189_c3/f1p0/570	F02_cb14189_c3/f1p0/570	F02_cb14189_c3/f1p0/570
F02_cb9149_c11/f1p0/858	NA	F02_cb9149_c11/f1p0/858	NA	F02_cb9149_c11/f1p0/858
F02_cb11041_c42263/f1p0/2334	F02_cb11041_c42263/f1p0/2334	F02_cb11041_c42263/f1p0/2334	F02_cb11041_c42263/f1p0/2334	F02_cb11041_c42263/f1p0/2334
F01_cb15459_c3/f2p0/1254	NA	NA	NA	F01_cb15459_c3/f2p0/1254
F02_cb3417_c16/f1p0/2028	NA	NA	NA	F02_cb3417_c16/f1p0/2028
F02_cb3271_c3/f1p0/1003	NA	F02_cb3271_c3/f1p0/1003	F02_cb3271_c3/f1p0/1003	F02_cb3271_c3/f1p0/1003
F01_cb15759_c2/f2p0/438	F01_cb15759_c2/f2p0/438	NA	NA	NA
F02_cb17838_c2/f1p0/996	NA	F02_cb17838_c2/f1p0/996	F02_cb17838_c2/f1p0/996	F02_cb17838_c2/f1p0/996
F01_cb10105_c2/f1p0/2038	F01_cb10105_c2/f1p0/2038	F01_cb10105_c2/f1p0/2038	F01_cb10105_c2/f1p0/2038	F01_cb10105_c2/f1p0/2038
F02_cb11093_c45/f1p0/2831	F02_cb11093_c45/f1p0/2831	F02_cb11093_c45/f1p0/2831	NA	F02_cb11093_c45/f1p0/2831
F01_cb12796_c1/f1p0/3467	NA	F01_cb12796_c1/f1p0/3467	NA	NA
F01_cb16438_c17584/f1p0/2273	NA	F01_cb16438_c17584/f1p0/2273	NA	F01_cb16438_c17584/f1p0/2273
F01_cb5936_c18/f1p0/1643	NA	F01_cb5936_c18/f1p0/1643	NA	NA
F01_cb21769_c3/f1p0/720	F01_cb21769_c3/f1p0/720	F01_cb21769_c3/f1p0/720	F01_cb21769_c3/f1p0/720	F01_cb21769_c3/f1p0/720
F02_cb16298_c0/f1p0/831	F02_cb16298_c0/f1p0/831	F02_cb16298_c0/f1p0/831	F02_cb16298_c0/f1p0/831	F02_cb16298_c0/f1p0/831
F01_cb9788_c149/f1p0/2654	NA	NA	NA	F01_cb9788_c149/f1p0/2654
F02_cb15771_c1/f1p0/862	F02_cb15771_c1/f1p0/862	F02_cb15771_c1/f1p0/862	NA	NA
F02_cb16571_c0/f3p0/514	NA	NA	F02_cb16571_c0/f3p0/514	F02_cb16571_c0/f3p0/514
F01_cb14295_c1/f1p0/1893	NA	F01_cb14295_c1/f1p0/1893	NA	NA
F01_cb2547_c4/f1p1/3273	NA	NA	F01_cb2547_c4/f1p1/3273	F01_cb2547_c4/f1p1/3273
F01_cb7234_c30/f1p0/1610	NA	F01_cb7234_c30/f1p0/1610	F01_cb7234_c30/f1p0/1610	F01_cb7234_c30/f1p0/1610
F02_cb1448_c6/f1p0/3808	F02_cb1448_c6/f1p0/3808	F02_cb1448_c6/f1p0/3808	NA	F02_cb1448_c6/f1p0/3808
F02_cb3529_c5/f1p0/2810	NA	F02_cb3529_c5/f1p0/2810	F02_cb3529_c5/f1p0/2810	NA
F02_cb5294_c1/f1p0/2676	NA	F02_cb5294_c1/f1p0/2676	F02_cb5294_c1/f1p0/2676	NA
F01_cb19682_c666/f1p0/1161	NA	F01_cb19682_c666/f1p0/1161	NA	NA
F02_cb9070_c10/f1p2/712	NA	F02_cb9070_c10/f1p2/712	NA	NA
F02_cb4448_c10/f1p0/2046	NA	F02_cb4448_c10/f1p0/2046	NA	NA
F01_cb10212_c6/f1p0/1833	NA	NA	NA	F01_cb10212_c6/f1p0/1833
F02_cb18428_c4/f1p0/1004	NA	NA	F02_cb18428_c4/f1p0/1004	F02_cb18428_c4/f1p0/1004
F01_cb2417_c9/f1p0/3484	NA	NA	NA	F01_cb2417_c9/f1p0/3484
F02_cb7340_c4/f1p0/1486	NA	NA	F02_cb7340_c4/f1p0/1486	F02_cb7340_c4/f1p0/1486
F02_cb11041_c3392/f5p0/2573	NA	F02_cb11041_c3392/f5p0/2573	F02_cb11041_c3392/f5p0/2573	F02_cb11041_c3392/f5p0/2573
F01_cb19254_c17/f2p0/734	NA	NA	F01_cb19254_c17/f2p0/734	F01_cb19254_c17/f2p0/734
F01_cb630_c21/f1p0/3909	NA	F01_cb630_c21/f1p0/3909	NA	NA
F02_cb12180_c1/f1p0/1656	NA	NA	F02_cb12180_c1/f1p0/1656	F02_cb12180_c1/f1p0/1656
F01_cb9698_c1/f1p0/1998	NA	NA	NA	F01_cb9698_c1/f1p0/1998
F01_cb12368_c1/f2p0/1697	NA	NA	NA	F01_cb12368_c1/f2p0/1697
F02_cb7909_c0/f1p0/2303	NA	NA	NA	F02_cb7909_c0/f1p0/2303
F02_cb19266_c87/f3p0/374	F02_cb19266_c87/f3p0/374	F02_cb19266_c87/f3p0/374	F02_cb19266_c87/f3p0/374	F02_cb19266_c87/f3p0/374
F01_cb6390_c2/f1p0/1920	F01_cb6390_c2/f1p0/1920	F01_cb6390_c2/f1p0/1920	F01_cb6390_c2/f1p0/1920	F01_cb6390_c2/f1p0/1920
F01_cb5525_c2/f1p0/870	NA	F01_cb5525_c2/f1p0/870	NA	F01_cb5525_c2/f1p0/870
F02_cb14975_c0/f1p0/764	F02_cb14975_c0/f1p0/764	F02_cb14975_c0/f1p0/764	F02_cb14975_c0/f1p0/764	F02_cb14975_c0/f1p0/764
F02_cb3996_c10/f1p0/2702	NA	F02_cb3996_c10/f1p0/2702	NA	F02_cb3996_c10/f1p0/2702
F02_cb7803_c6/f3p0/1267	NA	NA	NA	F02_cb7803_c6/f3p0/1267
F01_cb3880_c6/f1p0/1766	NA	F01_cb3880_c6/f1p0/1766	NA	NA
F01_cb15263_c0/f1p0/1483	NA	F01_cb15263_c0/f1p0/1483	F01_cb15263_c0/f1p0/1483	F01_cb15263_c0/f1p0/1483
F02_cb14024_c6/f1p0/702	F02_cb14024_c6/f1p0/702	F02_cb14024_c6/f1p0/702	NA	F02_cb14024_c6/f1p0/702
F02_cb11041_c52883/f1p6/2409	NA	NA	NA	F02_cb11041_c52883/f1p6/2409
F02_cb12687_c1/f1p0/1565	NA	NA	NA	F02_cb12687_c1/f1p0/1565
F02_cb9008_c88/f1p0/2421	F02_cb9008_c88/f1p0/2421	F02_cb9008_c88/f1p0/2421	F02_cb9008_c88/f1p0/2421	F02_cb9008_c88/f1p0/2421
F01_cb8868_c4/f1p1/2039	NA	NA	NA	F01_cb8868_c4/f1p1/2039
F02_cb18906_c1/f1p0/960	NA	F02_cb18906_c1/f1p0/960	NA	NA
F01_cb5185_c5/f1p0/2063	NA	NA	NA	F01_cb5185_c5/f1p0/2063
F01_cb12354_c3/f1p0/1587	F01_cb12354_c3/f1p0/1587	F01_cb12354_c3/f1p0/1587	F01_cb12354_c3/f1p0/1587	NA
F02_cb2162_c19/f1p0/1310	F02_cb2162_c19/f1p0/1310	NA	NA	NA
F01_cb4958_c47/f1p0/2319	NA	F01_cb4958_c47/f1p0/2319	NA	F01_cb4958_c47/f1p0/2319
F02_cb13877_c0/f1p0/860	NA	F02_cb13877_c0/f1p0/860	NA	NA
F02_cb12443_c2/f1p0/2795	F02_cb12443_c2/f1p0/2795	F02_cb12443_c2/f1p0/2795	NA	NA
F01_cb16438_c9844/f1p0/3152	NA	F01_cb16438_c9844/f1p0/3152	NA	NA
F01_cb6785_c0/f1p0/2535	NA	F01_cb6785_c0/f1p0/2535	NA	F01_cb6785_c0/f1p0/2535
F01_cb1557_c29/f1p0/1298	F01_cb1557_c29/f1p0/1298	F01_cb1557_c29/f1p0/1298	F01_cb1557_c29/f1p0/1298	F01_cb1557_c29/f1p0/1298
F01_cb12443_c21/f1p1/895	NA	F01_cb12443_c21/f1p1/895	NA	F01_cb12443_c21/f1p1/895
F02_cb9416_c9/f4p0/794	NA	F02_cb9416_c9/f4p0/794	NA	F02_cb9416_c9/f4p0/794
F01_cb3887_c7/f1p0/1816	NA	F01_cb3887_c7/f1p0/1816	NA	NA
F01_cb18752_c1/f1p0/658	NA	F01_cb18752_c1/f1p0/658	NA	NA
F02_cb16997_c0/f4p1/545	NA	F02_cb16997_c0/f4p1/545	NA	F02_cb16997_c0/f4p1/545
F01_cb13861_c0/f2p0/1230	NA	NA	NA	F01_cb13861_c0/f2p0/1230
F02_cb11041_c78735/f1p0/2206	NA	NA	NA	F02_cb11041_c78735/f1p0/2206
F01_cb14903_c1/f2p1/876	F01_cb14903_c1/f2p1/876	F01_cb14903_c1/f2p1/876	F01_cb14903_c1/f2p1/876	F01_cb14903_c1/f2p1/876
F01_cb263_c22/f1p0/1019	F01_cb263_c22/f1p0/1019	F01_cb263_c22/f1p0/1019	NA	F01_cb263_c22/f1p0/1019
F02_cb11041_c85592/f1p0/1303	NA	F02_cb11041_c85592/f1p0/1303	F02_cb11041_c85592/f1p0/1303	F02_cb11041_c85592/f1p0/1303
F02_cb2678_c17/f10p5/2598	NA	NA	NA	F02_cb2678_c17/f10p5/2598
F01_cb13459_c2/f1p0/1575	NA	F01_cb13459_c2/f1p0/1575	F01_cb13459_c2/f1p0/1575	F01_cb13459_c2/f1p0/1575
F01_cb9491_c1/f1p0/2079	F01_cb9491_c1/f1p0/2079	F01_cb9491_c1/f1p0/2079	F01_cb9491_c1/f1p0/2079	F01_cb9491_c1/f1p0/2079
F01_cb6504_c0/f1p0/2593	NA	NA	NA	F01_cb6504_c0/f1p0/2593
F02_cb5254_c3/f1p0/2447	NA	F02_cb5254_c3/f1p0/2447	NA	NA
F02_cb17149_c0/f2p0/489	F02_cb17149_c0/f2p0/489	F02_cb17149_c0/f2p0/489	NA	F02_cb17149_c0/f2p0/489
F01_cb8605_c0/f2p0/1563	NA	F01_cb8605_c0/f2p0/1563	NA	NA
F01_cb16438_c40073/f1p0/2765	NA	F01_cb16438_c40073/f1p0/2765	F01_cb16438_c40073/f1p0/2765	F01_cb16438_c40073/f1p0/2765
F01_cb19428_c1/f1p1/484	NA	F01_cb19428_c1/f1p1/484	NA	F01_cb19428_c1/f1p1/484
F01_cb17073_c0/f3p0/1108	NA	NA	NA	F01_cb17073_c0/f3p0/1108
F02_cb1517_c8/f1p0/2749	NA	F02_cb1517_c8/f1p0/2749	NA	NA
F01_cb6068_c35/f1p0/1924	NA	F01_cb6068_c35/f1p0/1924	F01_cb6068_c35/f1p0/1924	F01_cb6068_c35/f1p0/1924
F01_cb11847_c0/f4p0/1768	F01_cb11847_c0/f4p0/1768	F01_cb11847_c0/f4p0/1768	NA	F01_cb11847_c0/f4p0/1768
F02_cb11041_c1586/f2p0/2048	NA	NA	F02_cb11041_c1586/f2p0/2048	NA
F01_cb17934_c1/f2p1/808	NA	NA	F01_cb17934_c1/f2p1/808	NA
F01_cb20649_c3/f1p0/569	NA	F01_cb20649_c3/f1p0/569	NA	NA
F01_cb11770_c6/f1p0/1039	F01_cb11770_c6/f1p0/1039	F01_cb11770_c6/f1p0/1039	F01_cb11770_c6/f1p0/1039	F01_cb11770_c6/f1p0/1039
F02_cb149_c1/f1p0/4682	NA	NA	NA	F02_cb149_c1/f1p0/4682
F01_cb9141_c1/f1p1/1918	NA	F01_cb9141_c1/f1p1/1918	F01_cb9141_c1/f1p1/1918	F01_cb9141_c1/f1p1/1918
F01_cb294_c13/f1p0/838	F01_cb294_c13/f1p0/838	F01_cb294_c13/f1p0/838	NA	NA
F02_cb19037_c0/f1p0/499	NA	NA	NA	F02_cb19037_c0/f1p0/499
F02_cb10528_c1/f2p1/1885	NA	NA	NA	F02_cb10528_c1/f2p1/1885
F01_cb1067_c0/f1p0/3952	NA	F01_cb1067_c0/f1p0/3952	F01_cb1067_c0/f1p0/3952	NA
F01_cb16438_c8963/f2p0/1972	NA	NA	NA	F01_cb16438_c8963/f2p0/1972
F01_cb7599_c22/f1p1/2142	NA	NA	NA	F01_cb7599_c22/f1p1/2142
F01_cb8968_c3/f1p0/788	F01_cb8968_c3/f1p0/788	F01_cb8968_c3/f1p0/788	F01_cb8968_c3/f1p0/788	F01_cb8968_c3/f1p0/788
F02_cb6972_c10/f1p0/2087	NA	NA	NA	F02_cb6972_c10/f1p0/2087
F01_cb16871_c1/f8p0/519	F01_cb16871_c1/f8p0/519	NA	F01_cb16871_c1/f8p0/519	F01_cb16871_c1/f8p0/519
F02_cb1661_c5/f1p0/2007	NA	NA	NA	F02_cb1661_c5/f1p0/2007
F02_cb19017_c1/f1p0/1059	NA	F02_cb19017_c1/f1p0/1059	F02_cb19017_c1/f1p0/1059	NA
F01_cb16056_c2/f1p0/421	NA	F01_cb16056_c2/f1p0/421	NA	NA
F01_cb16438_c1246/f1p0/1948	NA	F01_cb16438_c1246/f1p0/1948	NA	NA
F01_cb7136_c8/f1p0/833	NA	F01_cb7136_c8/f1p0/833	NA	NA
F01_cb10254_c3/f1p0/976	F01_cb10254_c3/f1p0/976	F01_cb10254_c3/f1p0/976	F01_cb10254_c3/f1p0/976	F01_cb10254_c3/f1p0/976
F02_cb17744_c5/f3p1/598	NA	F02_cb17744_c5/f3p1/598	NA	NA
F01_cb16438_c63319/f1p0/2894	NA	NA	NA	F01_cb16438_c63319/f1p0/2894
F01_cb15723_c3/f1p0/621	NA	NA	F01_cb15723_c3/f1p0/621	F01_cb15723_c3/f1p0/621
F02_cb11041_c2942/f1p0/4403	NA	NA	NA	F02_cb11041_c2942/f1p0/4403
F02_cb9613_c14/f1p1/1800	NA	NA	F02_cb9613_c14/f1p1/1800	F02_cb9613_c14/f1p1/1800
F02_cb14485_c1/f1p0/2246	F02_cb14485_c1/f1p0/2246	F02_cb14485_c1/f1p0/2246	NA	F02_cb14485_c1/f1p0/2246
F01_cb3575_c1/f1p0/2556	F01_cb3575_c1/f1p0/2556	F01_cb3575_c1/f1p0/2556	F01_cb3575_c1/f1p0/2556	F01_cb3575_c1/f1p0/2556
F01_cb22251_c2/f1p0/5536	F01_cb22251_c2/f1p0/5536	F01_cb22251_c2/f1p0/5536	NA	F01_cb22251_c2/f1p0/5536
F01_cb16385_c5/f1p0/757	F01_cb16385_c5/f1p0/757	F01_cb16385_c5/f1p0/757	F01_cb16385_c5/f1p0/757	NA
F01_cb16438_c10141/f1p0/2414	F01_cb16438_c10141/f1p0/2414	F01_cb16438_c10141/f1p0/2414	F01_cb16438_c10141/f1p0/2414	NA
F01_cb13704_c4/f1p0/1508	NA	F01_cb13704_c4/f1p0/1508	NA	NA
F02_cb6816_c6/f1p0/855	NA	NA	NA	F02_cb6816_c6/f1p0/855
F02_cb14538_c1/f1p0/1112	NA	F02_cb14538_c1/f1p0/1112	NA	F02_cb14538_c1/f1p0/1112
F01_cb838_c13/f1p0/2960	NA	NA	NA	F01_cb838_c13/f1p0/2960
F02_cb17484_c5/f6p0/659	NA	F02_cb17484_c5/f6p0/659	NA	F02_cb17484_c5/f6p0/659
F01_cb14898_c17/f1p0/659	NA	NA	F01_cb14898_c17/f1p0/659	NA
F01_cb19117_c0/f1p0/748	NA	F01_cb19117_c0/f1p0/748	NA	NA
F02_cb8204_c4/f1p0/2233	NA	NA	NA	F02_cb8204_c4/f1p0/2233
F02_cb11041_c16322/f1p0/1554	NA	NA	F02_cb11041_c16322/f1p0/1554	NA
F01_cb15126_c72/f1p0/978	NA	F01_cb15126_c72/f1p0/978	NA	NA
F01_cb6837_c9/f1p0/1234	NA	NA	NA	F01_cb6837_c9/f1p0/1234
F02_cb3107_c139/f1p0/1623	NA	F02_cb3107_c139/f1p0/1623	F02_cb3107_c139/f1p0/1623	F02_cb3107_c139/f1p0/1623
F01_cb9822_c3/f1p0/833	F01_cb9822_c3/f1p0/833	F01_cb9822_c3/f1p0/833	F01_cb9822_c3/f1p0/833	F01_cb9822_c3/f1p0/833
F02_cb5874_c20/f1p0/521	F02_cb5874_c20/f1p0/521	F02_cb5874_c20/f1p0/521	F02_cb5874_c20/f1p0/521	NA
F01_cb10249_c8/f1p0/1831	NA	NA	NA	F01_cb10249_c8/f1p0/1831
F01_cb12727_c7/f1p2/1318	NA	F01_cb12727_c7/f1p2/1318	NA	NA
F01_cb19431_c3/f1p0/915	NA	NA	NA	F01_cb19431_c3/f1p0/915
F01_cb8893_c1/f1p0/2168	F01_cb8893_c1/f1p0/2168	F01_cb8893_c1/f1p0/2168	NA	NA
F01_cb6604_c11/f1p0/4487	NA	NA	NA	F01_cb6604_c11/f1p0/4487
F01_cb17457_c8/f1p0/1290	NA	NA	NA	F01_cb17457_c8/f1p0/1290
F02_cb18210_c47/f1p0/629	NA	NA	F02_cb18210_c47/f1p0/629	F02_cb18210_c47/f1p0/629
F01_cb8387_c3/f1p0/2227	F01_cb8387_c3/f1p0/2227	F01_cb8387_c3/f1p0/2227	NA	NA
F01_cb16818_c6/f1p0/589	F01_cb16818_c6/f1p0/589	F01_cb16818_c6/f1p0/589	F01_cb16818_c6/f1p0/589	F01_cb16818_c6/f1p0/589
F02_cb14939_c2/f1p0/1540	NA	F02_cb14939_c2/f1p0/1540	NA	NA
F01_cb21033_c1/f1p0/717	NA	F01_cb21033_c1/f1p0/717	NA	F01_cb21033_c1/f1p0/717
F02_cb9045_c0/f2p0/2066	NA	NA	NA	F02_cb9045_c0/f2p0/2066
F02_cb11041_c84656/f1p0/1766	NA	F02_cb11041_c84656/f1p0/1766	NA	NA
F01_cb6068_c17/f1p0/1926	NA	F01_cb6068_c17/f1p0/1926	NA	NA
F01_cb18399_c3/f1p0/1095	NA	NA	NA	F01_cb18399_c3/f1p0/1095
F01_cb13317_c6/f1p0/980	NA	F01_cb13317_c6/f1p0/980	NA	NA
F01_cb13372_c0/f1p0/682	NA	F01_cb13372_c0/f1p0/682	NA	NA
F01_cb14632_c2/f1p0/4968	NA	F01_cb14632_c2/f1p0/4968	NA	NA
F02_cb11104_c1/f1p0/1843	F02_cb11104_c1/f1p0/1843	F02_cb11104_c1/f1p0/1843	NA	NA
F01_cb16438_c23481/f1p1/3897	NA	NA	NA	F01_cb16438_c23481/f1p1/3897
F01_cb12607_c3/f1p0/1487	NA	F01_cb12607_c3/f1p0/1487	NA	NA
F01_cb16438_c41710/f1p0/2708	F01_cb16438_c41710/f1p0/2708	F01_cb16438_c41710/f1p0/2708	F01_cb16438_c41710/f1p0/2708	F01_cb16438_c41710/f1p0/2708
F01_cb16438_c33125/f1p0/2146	F01_cb16438_c33125/f1p0/2146	F01_cb16438_c33125/f1p0/2146	NA	F01_cb16438_c33125/f1p0/2146
F01_cb16438_c19000/f1p0/3952	NA	NA	NA	F01_cb16438_c19000/f1p0/3952
F02_cb6861_c0/f2p0/2267	NA	F02_cb6861_c0/f2p0/2267	NA	NA
F02_cb5647_c18/f1p0/2310	NA	F02_cb5647_c18/f1p0/2310	NA	F02_cb5647_c18/f1p0/2310
F02_cb17964_c111/f1p0/825	NA	NA	F02_cb17964_c111/f1p0/825	NA
F02_cb11041_c2656/f1p0/3339	F02_cb11041_c2656/f1p0/3339	F02_cb11041_c2656/f1p0/3339	NA	F02_cb11041_c2656/f1p0/3339
F02_cb14899_c0/f2p0/946	F02_cb14899_c0/f2p0/946	NA	NA	NA
F01_cb4738_c12/f1p2/2784	NA	NA	NA	F01_cb4738_c12/f1p2/2784
F02_cb11041_c9591/f1p0/1966	NA	NA	F02_cb11041_c9591/f1p0/1966	NA
F02_cb11041_c2954/f1p0/3208	NA	NA	NA	F02_cb11041_c2954/f1p0/3208
F01_cb134_c3/f1p0/4329	NA	NA	NA	F01_cb134_c3/f1p0/4329
F01_cb18664_c4/f1p0/1298	NA	F01_cb18664_c4/f1p0/1298	NA	NA
F01_cb13840_c1/f1p0/2524	F01_cb13840_c1/f1p0/2524	F01_cb13840_c1/f1p0/2524	NA	NA
F02_cb16188_c1/f1p0/1003	F02_cb16188_c1/f1p0/1003	F02_cb16188_c1/f1p0/1003	F02_cb16188_c1/f1p0/1003	F02_cb16188_c1/f1p0/1003
F01_cb9158_c9/f1p0/918	NA	F01_cb9158_c9/f1p0/918	NA	NA
F01_cb7997_c9/f1p0/1453	NA	NA	NA	F01_cb7997_c9/f1p0/1453
F01_cb21766_c1/f1p0/884	F01_cb21766_c1/f1p0/884	F01_cb21766_c1/f1p0/884	NA	F01_cb21766_c1/f1p0/884
F01_cb16438_c22672/f1p0/2588	NA	F01_cb16438_c22672/f1p0/2588	NA	NA
F02_cb11041_c3024/f2p0/2196	NA	NA	NA	F02_cb11041_c3024/f2p0/2196
F01_cb1814_c50/f1p0/1754	NA	F01_cb1814_c50/f1p0/1754	F01_cb1814_c50/f1p0/1754	F01_cb1814_c50/f1p0/1754
F01_cb7917_c16/f1p0/1432	NA	F01_cb7917_c16/f1p0/1432	F01_cb7917_c16/f1p0/1432	F01_cb7917_c16/f1p0/1432
F01_cb16127_c3/f1p0/659	F01_cb16127_c3/f1p0/659	F01_cb16127_c3/f1p0/659	F01_cb16127_c3/f1p0/659	NA
F02_cb15489_c15/f1p0/338	NA	NA	F02_cb15489_c15/f1p0/338	NA
F01_cb14731_c1/f1p0/2114	F01_cb14731_c1/f1p0/2114	F01_cb14731_c1/f1p0/2114	NA	NA
F01_cb15922_c11/f1p0/352	F01_cb15922_c11/f1p0/352	F01_cb15922_c11/f1p0/352	F01_cb15922_c11/f1p0/352	F01_cb15922_c11/f1p0/352
F02_cb16521_c0/f6p0/559	F02_cb16521_c0/f6p0/559	F02_cb16521_c0/f6p0/559	NA	NA
F01_cb6945_c4/f1p0/1197	NA	F01_cb6945_c4/f1p0/1197	NA	F01_cb6945_c4/f1p0/1197
F01_cb11796_c4/f1p0/1804	NA	NA	NA	F01_cb11796_c4/f1p0/1804
F01_cb1815_c5/f1p0/1644	NA	NA	NA	F01_cb1815_c5/f1p0/1644
F01_cb2507_c4/f3p0/1418	NA	NA	NA	F01_cb2507_c4/f3p0/1418
F01_cb19154_c1/f1p0/562	F01_cb19154_c1/f1p0/562	F01_cb19154_c1/f1p0/562	F01_cb19154_c1/f1p0/562	F01_cb19154_c1/f1p0/562
F01_cb15134_c4/f1p0/1204	NA	NA	NA	F01_cb15134_c4/f1p0/1204
F01_cb16438_c38731/f1p0/1708	NA	F01_cb16438_c38731/f1p0/1708	NA	F01_cb16438_c38731/f1p0/1708
F01_cb13375_c538/f1p6/605	NA	F01_cb13375_c538/f1p6/605	F01_cb13375_c538/f1p6/605	NA
F01_cb16438_c19823/f1p0/3311	F01_cb16438_c19823/f1p0/3311	F01_cb16438_c19823/f1p0/3311	F01_cb16438_c19823/f1p0/3311	F01_cb16438_c19823/f1p0/3311
F02_cb16822_c0/f2p0/702	NA	F02_cb16822_c0/f2p0/702	F02_cb16822_c0/f2p0/702	F02_cb16822_c0/f2p0/702
F01_cb13313_c2/f1p0/646	F01_cb13313_c2/f1p0/646	F01_cb13313_c2/f1p0/646	F01_cb13313_c2/f1p0/646	F01_cb13313_c2/f1p0/646
F01_cb21139_c1/f1p0/573	NA	F01_cb21139_c1/f1p0/573	NA	NA
F02_cb14489_c0/f1p0/1252	NA	F02_cb14489_c0/f1p0/1252	NA	F02_cb14489_c0/f1p0/1252
F01_cb18399_c2/f1p1/985	NA	F01_cb18399_c2/f1p1/985	NA	F01_cb18399_c2/f1p1/985
F02_cb3337_c17/f1p0/1335	NA	F02_cb3337_c17/f1p0/1335	NA	NA
F01_cb21104_c5/f1p0/909	F01_cb21104_c5/f1p0/909	F01_cb21104_c5/f1p0/909	NA	NA
F01_cb1406_c4/f1p0/3806	NA	NA	NA	F01_cb1406_c4/f1p0/3806
F01_cb16438_c38665/f1p0/2289	F01_cb16438_c38665/f1p0/2289	F01_cb16438_c38665/f1p0/2289	NA	NA
F01_cb16440_c0/f1p0/565	NA	F01_cb16440_c0/f1p0/565	F01_cb16440_c0/f1p0/565	F01_cb16440_c0/f1p0/565
F01_cb1104_c9/f1p0/2910	NA	NA	NA	F01_cb1104_c9/f1p0/2910
F01_cb21027_c1/f1p1/517	NA	F01_cb21027_c1/f1p1/517	NA	NA
F01_cb10660_c2/f1p0/1159	NA	NA	NA	F01_cb10660_c2/f1p0/1159
F02_cb19007_c0/f2p0/691	NA	F02_cb19007_c0/f2p0/691	F02_cb19007_c0/f2p0/691	NA
F01_cb17323_c10/f1p0/1283	NA	NA	NA	F01_cb17323_c10/f1p0/1283
F01_cb20842_c0/f1p0/662	F01_cb20842_c0/f1p0/662	F01_cb20842_c0/f1p0/662	F01_cb20842_c0/f1p0/662	F01_cb20842_c0/f1p0/662
F01_cb1559_c7/f1p0/2605	NA	NA	NA	F01_cb1559_c7/f1p0/2605
F01_cb14082_c1/f1p0/2627	NA	F01_cb14082_c1/f1p0/2627	NA	NA
F02_cb19534_c1/f1p0/1250	NA	NA	NA	F02_cb19534_c1/f1p0/1250
F01_cb4750_c21/f1p0/2680	NA	F01_cb4750_c21/f1p0/2680	NA	NA
F02_cb7402_c1/f1p0/2367	NA	NA	NA	F02_cb7402_c1/f1p0/2367
F01_cb12337_c2/f1p0/1733	NA	NA	NA	F01_cb12337_c2/f1p0/1733
F02_cb11041_c117791/f1p0/2002	NA	NA	NA	F02_cb11041_c117791/f1p0/2002
F02_cb4792_c7/f1p0/1500	NA	F02_cb4792_c7/f1p0/1500	NA	NA
F01_cb16493_c2/f1p0/567	NA	F01_cb16493_c2/f1p0/567	NA	NA
F01_cb12704_c5/f1p0/1289	NA	F01_cb12704_c5/f1p0/1289	F01_cb12704_c5/f1p0/1289	F01_cb12704_c5/f1p0/1289
F01_cb16438_c43175/f1p0/2229	F01_cb16438_c43175/f1p0/2229	F01_cb16438_c43175/f1p0/2229	F01_cb16438_c43175/f1p0/2229	F01_cb16438_c43175/f1p0/2229
F02_cb3394_c6/f1p0/2937	NA	F02_cb3394_c6/f1p0/2937	NA	NA
F01_cb14925_c5/f3p1/653	NA	F01_cb14925_c5/f3p1/653	F01_cb14925_c5/f3p1/653	F01_cb14925_c5/f3p1/653
F02_cb18254_c0/f1p0/671	NA	F02_cb18254_c0/f1p0/671	F02_cb18254_c0/f1p0/671	F02_cb18254_c0/f1p0/671
F01_cb3192_c7/f1p0/468	F01_cb3192_c7/f1p0/468	F01_cb3192_c7/f1p0/468	NA	NA
F01_cb13440_c7/f1p0/799	NA	F01_cb13440_c7/f1p0/799	NA	NA
F02_cb11041_c1113/f1p0/1978	NA	F02_cb11041_c1113/f1p0/1978	F02_cb11041_c1113/f1p0/1978	F02_cb11041_c1113/f1p0/1978
F01_cb16438_c1254/f1p0/2926	NA	F01_cb16438_c1254/f1p0/2926	NA	F01_cb16438_c1254/f1p0/2926
F01_cb3518_c14/f1p0/580	NA	F01_cb3518_c14/f1p0/580	NA	F01_cb3518_c14/f1p0/580
F01_cb1810_c10/f1p0/2200	NA	F01_cb1810_c10/f1p0/2200	NA	F01_cb1810_c10/f1p0/2200
F02_cb14334_c2/f1p0/1121	NA	NA	NA	F02_cb14334_c2/f1p0/1121
F01_cb9340_c1/f3p1/1993	NA	NA	NA	F01_cb9340_c1/f3p1/1993
F02_cb17436_c1/f1p0/842	NA	NA	NA	F02_cb17436_c1/f1p0/842
F01_cb21195_c1/f1p0/485	F01_cb21195_c1/f1p0/485	F01_cb21195_c1/f1p0/485	NA	NA
F01_cb16498_c8/f1p0/1133	NA	F01_cb16498_c8/f1p0/1133	NA	NA
F02_cb1058_c6/f1p0/1449	NA	NA	NA	F02_cb1058_c6/f1p0/1449
F02_cb7990_c0/f2p0/1270	NA	NA	NA	F02_cb7990_c0/f2p0/1270
F01_cb16438_c4018/f1p0/1907	NA	F01_cb16438_c4018/f1p0/1907	NA	F01_cb16438_c4018/f1p0/1907
F02_cb14490_c1/f1p0/1698	NA	F02_cb14490_c1/f1p0/1698	NA	NA
F01_cb6414_c7/f1p0/1472	NA	NA	NA	F01_cb6414_c7/f1p0/1472
F02_cb17860_c0/f2p1/612	NA	F02_cb17860_c0/f2p1/612	NA	F02_cb17860_c0/f2p1/612
F01_cb1016_c8/f1p0/2557	NA	NA	NA	F01_cb1016_c8/f1p0/2557
F01_cb18634_c7/f1p0/1442	NA	F01_cb18634_c7/f1p0/1442	NA	NA
F02_cb9982_c6/f1p0/1809	F02_cb9982_c6/f1p0/1809	NA	NA	F02_cb9982_c6/f1p0/1809
F01_cb17195_c6/f6p1/601	NA	NA	NA	F01_cb17195_c6/f6p1/601
F01_cb7067_c27/f1p0/1571	NA	NA	NA	F01_cb7067_c27/f1p0/1571
F01_cb19642_c0/f2p0/1143	F01_cb19642_c0/f2p0/1143	F01_cb19642_c0/f2p0/1143	F01_cb19642_c0/f2p0/1143	F01_cb19642_c0/f2p0/1143
F01_cb20900_c5/f1p0/995	NA	F01_cb20900_c5/f1p0/995	NA	NA
F01_cb8079_c36/f1p0/1774	NA	NA	NA	F01_cb8079_c36/f1p0/1774
F01_cb20279_c0/f1p0/1004	NA	NA	NA	F01_cb20279_c0/f1p0/1004
F01_cb22062_c1/f1p0/622	F01_cb22062_c1/f1p0/622	F01_cb22062_c1/f1p0/622	F01_cb22062_c1/f1p0/622	F01_cb22062_c1/f1p0/622
F02_cb11041_c48386/f2p0/2229	NA	F02_cb11041_c48386/f2p0/2229	F02_cb11041_c48386/f2p0/2229	F02_cb11041_c48386/f2p0/2229
F02_cb5376_c7/f1p0/1759	F02_cb5376_c7/f1p0/1759	F02_cb5376_c7/f1p0/1759	NA	F02_cb5376_c7/f1p0/1759
F02_cb16117_c3/f1p0/519	NA	F02_cb16117_c3/f1p0/519	NA	NA
F01_cb16438_c7270/f3p1/1926	NA	F01_cb16438_c7270/f3p1/1926	NA	NA
F01_cb20186_c0/f4p0/689	NA	F01_cb20186_c0/f4p0/689	F01_cb20186_c0/f4p0/689	NA
F02_cb5948_c3/f1p1/2485	NA	NA	NA	F02_cb5948_c3/f1p1/2485
F02_cb9657_c3/f1p0/941	F02_cb9657_c3/f1p0/941	F02_cb9657_c3/f1p0/941	NA	NA
F02_cb10308_c36/f1p0/1388	NA	NA	NA	F02_cb10308_c36/f1p0/1388
F01_cb2998_c14/f1p0/1683	NA	NA	NA	F01_cb2998_c14/f1p0/1683
F01_cb3953_c5/f1p0/2355	NA	F01_cb3953_c5/f1p0/2355	NA	F01_cb3953_c5/f1p0/2355
F01_cb18014_c3/f1p0/557	F01_cb18014_c3/f1p0/557	F01_cb18014_c3/f1p0/557	NA	NA
F01_cb21552_c1/f1p0/672	NA	F01_cb21552_c1/f1p0/672	F01_cb21552_c1/f1p0/672	F01_cb21552_c1/f1p0/672
F01_cb4961_c67/f1p0/2701	NA	F01_cb4961_c67/f1p0/2701	NA	NA
F01_cb16241_c19/f12p0/505	NA	F01_cb16241_c19/f12p0/505	NA	F01_cb16241_c19/f12p0/505
F01_cb6376_c5/f1p0/2920	NA	NA	NA	F01_cb6376_c5/f1p0/2920
F01_cb4436_c3/f1p0/2005	NA	F01_cb4436_c3/f1p0/2005	NA	NA
F02_cb2023_c1/f1p0/1485	NA	F02_cb2023_c1/f1p0/1485	NA	NA
F01_cb15513_c2/f1p1/791	NA	F01_cb15513_c2/f1p1/791	NA	NA
F01_cb14274_c0/f1p0/927	NA	NA	F01_cb14274_c0/f1p0/927	NA
F01_cb2728_c8/f1p0/2601	NA	NA	NA	F01_cb2728_c8/f1p0/2601
F01_cb14731_c0/f1p0/829	NA	F01_cb14731_c0/f1p0/829	NA	NA
F01_cb3032_c2/f1p0/3587	NA	F01_cb3032_c2/f1p0/3587	NA	F01_cb3032_c2/f1p0/3587
F02_cb4079_c0/f1p0/2973	NA	F02_cb4079_c0/f1p0/2973	NA	NA
F02_cb11041_c44389/f1p0/3570	NA	F02_cb11041_c44389/f1p0/3570	NA	F02_cb11041_c44389/f1p0/3570
F02_cb19728_c0/f1p0/4854	NA	F02_cb19728_c0/f1p0/4854	NA	F02_cb19728_c0/f1p0/4854
F02_cb8516_c5/f1p0/3402	NA	F02_cb8516_c5/f1p0/3402	F02_cb8516_c5/f1p0/3402	F02_cb8516_c5/f1p0/3402
F02_cb11041_c44429/f1p0/2157	NA	F02_cb11041_c44429/f1p0/2157	F02_cb11041_c44429/f1p0/2157	F02_cb11041_c44429/f1p0/2157
F02_cb16952_c3/f1p0/823	NA	F02_cb16952_c3/f1p0/823	NA	F02_cb16952_c3/f1p0/823
F02_cb11041_c3986/f1p0/2041	NA	F02_cb11041_c3986/f1p0/2041	NA	NA
F02_cb3840_c47/f1p1/2957	NA	NA	NA	F02_cb3840_c47/f1p1/2957
F02_cb11041_c78015/f1p0/2458	NA	NA	NA	F02_cb11041_c78015/f1p0/2458
F01_cb20849_c2/f1p0/652	NA	F01_cb20849_c2/f1p0/652	NA	NA
F01_cb1841_c5/f1p0/4101	NA	NA	F01_cb1841_c5/f1p0/4101	F01_cb1841_c5/f1p0/4101
F02_cb18404_c2/f1p0/1216	NA	F02_cb18404_c2/f1p0/1216	NA	NA
F01_cb8180_c3/f1p0/887	F01_cb8180_c3/f1p0/887	F01_cb8180_c3/f1p0/887	F01_cb8180_c3/f1p0/887	F01_cb8180_c3/f1p0/887
F01_cb1701_c4/f1p0/1773	NA	NA	NA	F01_cb1701_c4/f1p0/1773
F01_cb12612_c2/f1p0/677	F01_cb12612_c2/f1p0/677	F01_cb12612_c2/f1p0/677	F01_cb12612_c2/f1p0/677	F01_cb12612_c2/f1p0/677
F02_cb11041_c45976/f1p1/1449	NA	NA	F02_cb11041_c45976/f1p1/1449	NA
F01_cb3700_c16/f1p0/1858	NA	F01_cb3700_c16/f1p0/1858	NA	NA
F02_cb6457_c4/f1p0/1601	NA	F02_cb6457_c4/f1p0/1601	NA	NA
F01_cb5719_c5/f1p0/1032	NA	NA	NA	F01_cb5719_c5/f1p0/1032
F01_cb14148_c4/f1p0/1091	NA	NA	NA	F01_cb14148_c4/f1p0/1091
F02_cb13661_c3/f1p0/1191	NA	NA	NA	F02_cb13661_c3/f1p0/1191
F02_cb11041_c90521/f1p7/2639	NA	NA	NA	F02_cb11041_c90521/f1p7/2639
F01_cb16438_c2068/f1p0/2776	F01_cb16438_c2068/f1p0/2776	F01_cb16438_c2068/f1p0/2776	NA	NA
F01_cb15983_c1/f1p0/674	NA	F01_cb15983_c1/f1p0/674	NA	NA
F01_cb14348_c2/f1p0/949	NA	F01_cb14348_c2/f1p0/949	F01_cb14348_c2/f1p0/949	F01_cb14348_c2/f1p0/949
F01_cb12870_c3/f1p0/406	F01_cb12870_c3/f1p0/406	F01_cb12870_c3/f1p0/406	F01_cb12870_c3/f1p0/406	F01_cb12870_c3/f1p0/406
F01_cb7627_c8/f1p0/1271	NA	NA	NA	F01_cb7627_c8/f1p0/1271
F01_cb20702_c1/f1p0/448	F01_cb20702_c1/f1p0/448	F01_cb20702_c1/f1p0/448	NA	F01_cb20702_c1/f1p0/448
F02_cb5006_c0/f3p0/1774	NA	NA	NA	F02_cb5006_c0/f3p0/1774
F01_cb2947_c1/f1p0/3307	F01_cb2947_c1/f1p0/3307	F01_cb2947_c1/f1p0/3307	NA	NA
F01_cb4059_c7/f1p0/2343	NA	F01_cb4059_c7/f1p0/2343	NA	NA
F02_cb2760_c2/f1p0/3309	NA	F02_cb2760_c2/f1p0/3309	NA	NA
F01_cb18538_c5/f6p1/518	NA	F01_cb18538_c5/f6p1/518	F01_cb18538_c5/f6p1/518	NA
F01_cb16186_c1/f2p0/544	NA	F01_cb16186_c1/f2p0/544	NA	NA
F02_cb18846_c0/f2p0/795	F02_cb18846_c0/f2p0/795	F02_cb18846_c0/f2p0/795	F02_cb18846_c0/f2p0/795	F02_cb18846_c0/f2p0/795
F02_cb11041_c2393/f1p0/1860	NA	NA	NA	F02_cb11041_c2393/f1p0/1860
F01_cb18996_c2/f1p0/1451	NA	F01_cb18996_c2/f1p0/1451	F01_cb18996_c2/f1p0/1451	F01_cb18996_c2/f1p0/1451
F01_cb16550_c5/f1p0/852	NA	F01_cb16550_c5/f1p0/852	NA	NA
F01_cb16438_c2890/f1p0/2339	F01_cb16438_c2890/f1p0/2339	F01_cb16438_c2890/f1p0/2339	F01_cb16438_c2890/f1p0/2339	F01_cb16438_c2890/f1p0/2339
F02_cb16761_c2/f5p0/487	NA	F02_cb16761_c2/f5p0/487	NA	NA
F01_cb16202_c5/f1p0/1536	NA	NA	NA	F01_cb16202_c5/f1p0/1536
F01_cb1202_c1/f1p0/3872	NA	NA	NA	F01_cb1202_c1/f1p0/3872
F02_cb11041_c86284/f1p0/1549	NA	NA	F02_cb11041_c86284/f1p0/1549	F02_cb11041_c86284/f1p0/1549
F02_cb6891_c2/f1p0/2335	NA	NA	NA	F02_cb6891_c2/f1p0/2335
F02_cb6221_c9/f1p0/2113	NA	F02_cb6221_c9/f1p0/2113	NA	NA
F02_cb2988_c3/f1p0/2982	NA	F02_cb2988_c3/f1p0/2982	NA	NA
F02_cb4004_c9/f1p0/2788	NA	NA	NA	F02_cb4004_c9/f1p0/2788
F01_cb10212_c7/f1p0/1768	NA	NA	NA	F01_cb10212_c7/f1p0/1768
F02_cb11041_c2678/f1p0/2368	F02_cb11041_c2678/f1p0/2368	F02_cb11041_c2678/f1p0/2368	F02_cb11041_c2678/f1p0/2368	F02_cb11041_c2678/f1p0/2368
F01_cb3030_c4/f1p0/2846	NA	NA	NA	F01_cb3030_c4/f1p0/2846
F01_cb5526_c1/f1p0/2021	NA	NA	NA	F01_cb5526_c1/f1p0/2021
F01_cb20989_c0/f2p0/717	NA	F01_cb20989_c0/f2p0/717	F01_cb20989_c0/f2p0/717	F01_cb20989_c0/f2p0/717
F01_cb16438_c3492/f1p0/2491	NA	F01_cb16438_c3492/f1p0/2491	NA	F01_cb16438_c3492/f1p0/2491
F01_cb11147_c2/f1p0/1910	NA	F01_cb11147_c2/f1p0/1910	NA	NA
F01_cb18377_c0/f2p0/1548	NA	NA	NA	F01_cb18377_c0/f2p0/1548
F01_cb13645_c3/f1p0/377	F01_cb13645_c3/f1p0/377	F01_cb13645_c3/f1p0/377	NA	NA
F01_cb6051_c11/f1p0/2509	NA	F01_cb6051_c11/f1p0/2509	NA	F01_cb6051_c11/f1p0/2509
F02_cb5988_c2/f1p0/1432	F02_cb5988_c2/f1p0/1432	NA	NA	NA
F02_cb9613_c15/f1p0/1649	NA	NA	F02_cb9613_c15/f1p0/1649	F02_cb9613_c15/f1p0/1649
F01_cb17974_c3/f1p0/1404	NA	F01_cb17974_c3/f1p0/1404	NA	NA
F01_cb13481_c7/f1p0/1015	NA	F01_cb13481_c7/f1p0/1015	NA	NA
F01_cb9796_c59/f1p0/3275	NA	F01_cb9796_c59/f1p0/3275	NA	NA
F01_cb16438_c10837/f1p0/2271	NA	NA	NA	F01_cb16438_c10837/f1p0/2271
F02_cb2964_c10/f1p0/2032	NA	F02_cb2964_c10/f1p0/2032	NA	NA
F01_cb15754_c11/f1p0/669	NA	F01_cb15754_c11/f1p0/669	NA	NA
F01_cb3326_c32/f9p1/2324	NA	NA	NA	F01_cb3326_c32/f9p1/2324
F02_cb15996_c0/f1p0/808	NA	NA	NA	F02_cb15996_c0/f1p0/808
F02_cb1202_c0/f1p0/3917	NA	NA	NA	F02_cb1202_c0/f1p0/3917
F02_cb4148_c1/f1p0/2776	NA	F02_cb4148_c1/f1p0/2776	NA	NA
F02_cb18171_c2/f1p0/441	NA	F02_cb18171_c2/f1p0/441	F02_cb18171_c2/f1p0/441	NA
F02_cb14670_c1/f1p0/1613	F02_cb14670_c1/f1p0/1613	F02_cb14670_c1/f1p0/1613	NA	F02_cb14670_c1/f1p0/1613
F01_cb16438_c4004/f1p0/2604	NA	F01_cb16438_c4004/f1p0/2604	NA	NA
F01_cb2774_c2/f1p0/2961	NA	NA	NA	F01_cb2774_c2/f1p0/2961
F01_cb9037_c0/f1p0/2201	NA	F01_cb9037_c0/f1p0/2201	NA	F01_cb9037_c0/f1p0/2201
F02_cb12129_c2/f1p0/3127	NA	F02_cb12129_c2/f1p0/3127	NA	NA
F01_cb16438_c22534/f1p0/1891	NA	NA	NA	F01_cb16438_c22534/f1p0/1891
F01_cb17853_c4/f1p0/1590	NA	F01_cb17853_c4/f1p0/1590	NA	NA
F01_cb93_c5/f1p0/2701	NA	NA	NA	F01_cb93_c5/f1p0/2701
F01_cb9407_c19/f11p0/1397	NA	NA	NA	F01_cb9407_c19/f11p0/1397
F01_cb9135_c0/f1p0/2189	NA	F01_cb9135_c0/f1p0/2189	NA	NA
F02_cb11041_c54162/f1p0/1356	NA	F02_cb11041_c54162/f1p0/1356	F02_cb11041_c54162/f1p0/1356	F02_cb11041_c54162/f1p0/1356
F01_cb302_c9/f1p0/904	F01_cb302_c9/f1p0/904	F01_cb302_c9/f1p0/904	NA	F01_cb302_c9/f1p0/904
F01_cb13612_c3/f1p0/515	NA	F01_cb13612_c3/f1p0/515	F01_cb13612_c3/f1p0/515	F01_cb13612_c3/f1p0/515
F02_cb4232_c3/f1p0/1572	NA	NA	NA	F02_cb4232_c3/f1p0/1572
F01_cb1814_c27/f1p0/2940	NA	NA	NA	F01_cb1814_c27/f1p0/2940
F01_cb7371_c1/f1p0/2440	NA	NA	F01_cb7371_c1/f1p0/2440	F01_cb7371_c1/f1p0/2440
F02_cb16866_c0/f1p0/685	F02_cb16866_c0/f1p0/685	F02_cb16866_c0/f1p0/685	NA	F02_cb16866_c0/f1p0/685
F01_cb16438_c46254/f1p0/2306	NA	F01_cb16438_c46254/f1p0/2306	NA	F01_cb16438_c46254/f1p0/2306
F02_cb16269_c0/f1p0/447	NA	F02_cb16269_c0/f1p0/447	NA	F02_cb16269_c0/f1p0/447
F01_cb9959_c5/f1p0/1220	NA	NA	NA	F01_cb9959_c5/f1p0/1220
F02_cb11041_c57106/f1p0/2206	NA	F02_cb11041_c57106/f1p0/2206	NA	F02_cb11041_c57106/f1p0/2206
F01_cb1814_c39/f1p0/3128	NA	NA	NA	F01_cb1814_c39/f1p0/3128
F01_cb15040_c7/f2p0/1337	NA	NA	NA	F01_cb15040_c7/f2p0/1337
F02_cb12446_c6/f1p0/537	NA	F02_cb12446_c6/f1p0/537	NA	NA
F01_cb16438_c37042/f1p0/2122	NA	NA	NA	F01_cb16438_c37042/f1p0/2122
F01_cb8980_c22/f1p0/1990	F01_cb8980_c22/f1p0/1990	F01_cb8980_c22/f1p0/1990	NA	F01_cb8980_c22/f1p0/1990
F01_cb8961_c2/f1p0/1439	NA	F01_cb8961_c2/f1p0/1439	NA	NA
F02_cb15072_c0/f25p1/1168	NA	F02_cb15072_c0/f25p1/1168	NA	NA
F02_cb6731_c1/f1p0/2138	NA	F02_cb6731_c1/f1p0/2138	F02_cb6731_c1/f1p0/2138	F02_cb6731_c1/f1p0/2138
F02_cb5916_c0/f2p0/2560	NA	NA	NA	F02_cb5916_c0/f2p0/2560
F01_cb5750_c2/f1p0/2714	NA	NA	NA	F01_cb5750_c2/f1p0/2714
F02_cb10455_c3/f1p0/816	F02_cb10455_c3/f1p0/816	F02_cb10455_c3/f1p0/816	F02_cb10455_c3/f1p0/816	F02_cb10455_c3/f1p0/816
F01_cb3999_c5/f1p0/1669	NA	NA	NA	F01_cb3999_c5/f1p0/1669
F02_cb7207_c2/f1p0/1519	F02_cb7207_c2/f1p0/1519	F02_cb7207_c2/f1p0/1519	NA	F02_cb7207_c2/f1p0/1519
F01_cb256_c3/f1p0/4325	NA	NA	NA	F01_cb256_c3/f1p0/4325
F02_cb14698_c1/f1p0/1872	F02_cb14698_c1/f1p0/1872	F02_cb14698_c1/f1p0/1872	NA	F02_cb14698_c1/f1p0/1872
F02_cb12453_c0/f1p0/1607	NA	NA	NA	F02_cb12453_c0/f1p0/1607
F01_cb16438_c2545/f1p0/1922	NA	NA	NA	F01_cb16438_c2545/f1p0/1922
F02_cb11041_c82859/f1p1/1962	NA	NA	NA	F02_cb11041_c82859/f1p1/1962
F02_cb16956_c5/f1p0/705	NA	F02_cb16956_c5/f1p0/705	NA	NA
F02_cb9679_c1/f1p0/1486	F02_cb9679_c1/f1p0/1486	F02_cb9679_c1/f1p0/1486	F02_cb9679_c1/f1p0/1486	F02_cb9679_c1/f1p0/1486
F01_cb686_c13/f1p1/3660	NA	NA	NA	F01_cb686_c13/f1p1/3660
F01_cb6026_c23/f1p1/1938	NA	F01_cb6026_c23/f1p1/1938	NA	NA
F01_cb21203_c1/f1p0/676	NA	F01_cb21203_c1/f1p0/676	F01_cb21203_c1/f1p0/676	F01_cb21203_c1/f1p0/676
F01_cb8079_c61/f1p2/1911	NA	NA	NA	F01_cb8079_c61/f1p2/1911
F02_cb11919_c4/f1p0/1699	NA	NA	NA	F02_cb11919_c4/f1p0/1699
F02_cb14960_c1/f1p0/1813	NA	F02_cb14960_c1/f1p0/1813	F02_cb14960_c1/f1p0/1813	F02_cb14960_c1/f1p0/1813
F02_cb139_c32/f1p0/4690	NA	NA	NA	F02_cb139_c32/f1p0/4690
F02_cb19266_c84/f1p0/1170	F02_cb19266_c84/f1p0/1170	F02_cb19266_c84/f1p0/1170	F02_cb19266_c84/f1p0/1170	F02_cb19266_c84/f1p0/1170
F02_cb11041_c116974/f1p2/4431	NA	NA	F02_cb11041_c116974/f1p2/4431	NA
F02_cb14703_c1/f1p0/1964	NA	F02_cb14703_c1/f1p0/1964	NA	NA
F02_cb11041_c2821/f1p0/2338	NA	F02_cb11041_c2821/f1p0/2338	F02_cb11041_c2821/f1p0/2338	F02_cb11041_c2821/f1p0/2338
F02_cb4677_c23/f1p1/2745	NA	NA	NA	F02_cb4677_c23/f1p1/2745
F02_cb2878_c17/f1p0/1156	F02_cb2878_c17/f1p0/1156	F02_cb2878_c17/f1p0/1156	F02_cb2878_c17/f1p0/1156	F02_cb2878_c17/f1p0/1156
F01_cb16438_c17511/f1p1/2000	NA	F01_cb16438_c17511/f1p1/2000	NA	NA
F01_cb16438_c40614/f1p0/2540	NA	F01_cb16438_c40614/f1p0/2540	NA	NA
F01_cb21760_c1/f1p0/536	F01_cb21760_c1/f1p0/536	F01_cb21760_c1/f1p0/536	F01_cb21760_c1/f1p0/536	F01_cb21760_c1/f1p0/536
F02_cb19707_c1/f1p0/1032	NA	F02_cb19707_c1/f1p0/1032	F02_cb19707_c1/f1p0/1032	F02_cb19707_c1/f1p0/1032
F01_cb13519_c0/f1p0/1007	NA	F01_cb13519_c0/f1p0/1007	NA	NA
F02_cb15878_c0/f3p0/449	F02_cb15878_c0/f3p0/449	F02_cb15878_c0/f3p0/449	NA	F02_cb15878_c0/f3p0/449
F02_cb11041_c1207/f2p0/1702	NA	NA	NA	F02_cb11041_c1207/f2p0/1702
F01_cb15309_c17/f1p0/826	NA	NA	NA	F01_cb15309_c17/f1p0/826
F01_cb16438_c13891/f1p0/1926	F01_cb16438_c13891/f1p0/1926	F01_cb16438_c13891/f1p0/1926	F01_cb16438_c13891/f1p0/1926	F01_cb16438_c13891/f1p0/1926
F02_cb699_c6/f1p0/1842	NA	NA	NA	F02_cb699_c6/f1p0/1842
F02_cb7170_c3/f2p0/498	F02_cb7170_c3/f2p0/498	F02_cb7170_c3/f2p0/498	NA	F02_cb7170_c3/f2p0/498
F02_cb9850_c5/f1p1/1984	NA	NA	NA	F02_cb9850_c5/f1p1/1984
F01_cb16438_c71716/f1p1/2325	NA	F01_cb16438_c71716/f1p1/2325	F01_cb16438_c71716/f1p1/2325	F01_cb16438_c71716/f1p1/2325
F02_cb6331_c14/f1p0/2454	NA	F02_cb6331_c14/f1p0/2454	F02_cb6331_c14/f1p0/2454	F02_cb6331_c14/f1p0/2454
F01_cb3956_c24/f1p0/2988	NA	F01_cb3956_c24/f1p0/2988	NA	NA
F01_cb18552_c1/f1p0/733	F01_cb18552_c1/f1p0/733	F01_cb18552_c1/f1p0/733	F01_cb18552_c1/f1p0/733	F01_cb18552_c1/f1p0/733
F01_cb9886_c4/f1p0/1609	NA	F01_cb9886_c4/f1p0/1609	NA	NA
F02_cb7064_c3/f1p0/473	NA	F02_cb7064_c3/f1p0/473	F02_cb7064_c3/f1p0/473	F02_cb7064_c3/f1p0/473
F02_cb17659_c4/f1p0/483	F02_cb17659_c4/f1p0/483	F02_cb17659_c4/f1p0/483	F02_cb17659_c4/f1p0/483	F02_cb17659_c4/f1p0/483
F01_cb11810_c2/f1p0/1595	NA	F01_cb11810_c2/f1p0/1595	NA	NA
F01_cb16438_c1155/f1p0/3407	NA	F01_cb16438_c1155/f1p0/3407	F01_cb16438_c1155/f1p0/3407	NA
F01_cb5694_c0/f1p0/2724	NA	F01_cb5694_c0/f1p0/2724	F01_cb5694_c0/f1p0/2724	NA
F02_cb8921_c12/f1p0/1705	F02_cb8921_c12/f1p0/1705	F02_cb8921_c12/f1p0/1705	F02_cb8921_c12/f1p0/1705	F02_cb8921_c12/f1p0/1705
F01_cb17433_c0/f1p0/997	NA	NA	F01_cb17433_c0/f1p0/997	F01_cb17433_c0/f1p0/997
F02_cb7742_c12/f1p0/951	NA	F02_cb7742_c12/f1p0/951	NA	NA
F02_cb16422_c0/f1p0/712	F02_cb16422_c0/f1p0/712	F02_cb16422_c0/f1p0/712	NA	F02_cb16422_c0/f1p0/712
F02_cb7175_c5/f1p0/4916	NA	F02_cb7175_c5/f1p0/4916	NA	NA
F02_cb11702_c1/f1p0/2998	NA	NA	NA	F02_cb11702_c1/f1p0/2998
F02_cb2779_c2/f1p0/952	NA	F02_cb2779_c2/f1p0/952	NA	F02_cb2779_c2/f1p0/952
F01_cb17178_c0/f1p0/1057	NA	F01_cb17178_c0/f1p0/1057	F01_cb17178_c0/f1p0/1057	NA
F01_cb13167_c3/f1p0/671	F01_cb13167_c3/f1p0/671	F01_cb13167_c3/f1p0/671	F01_cb13167_c3/f1p0/671	F01_cb13167_c3/f1p0/671
F01_cb2001_c0/f4p0/3462	NA	NA	NA	F01_cb2001_c0/f4p0/3462
F02_cb11041_c16700/f1p3/2776	NA	NA	F02_cb11041_c16700/f1p3/2776	NA
F02_cb14622_c0/f1p0/552	NA	F02_cb14622_c0/f1p0/552	F02_cb14622_c0/f1p0/552	F02_cb14622_c0/f1p0/552
F02_cb8163_c18/f1p0/1744	NA	F02_cb8163_c18/f1p0/1744	F02_cb8163_c18/f1p0/1744	NA
F01_cb13600_c2/f1p0/852	NA	F01_cb13600_c2/f1p0/852	F01_cb13600_c2/f1p0/852	F01_cb13600_c2/f1p0/852
F02_cb11041_c75289/f1p0/2303	NA	NA	NA	F02_cb11041_c75289/f1p0/2303
F02_cb18541_c1/f1p0/891	NA	F02_cb18541_c1/f1p0/891	NA	NA
F01_cb4628_c18/f1p0/1772	NA	NA	NA	F01_cb4628_c18/f1p0/1772
F01_cb11273_c11/f1p0/1813	NA	F01_cb11273_c11/f1p0/1813	F01_cb11273_c11/f1p0/1813	F01_cb11273_c11/f1p0/1813
F02_cb9109_c3/f1p0/1542	NA	NA	F02_cb9109_c3/f1p0/1542	NA
F01_cb16473_c1/f4p1/546	NA	F01_cb16473_c1/f4p1/546	NA	NA
F01_cb10299_c2/f1p0/2025	NA	F01_cb10299_c2/f1p0/2025	NA	NA
F02_cb1026_c22/f1p0/2509	NA	NA	NA	F02_cb1026_c22/f1p0/2509
F02_cb16222_c3/f1p0/895	NA	NA	NA	F02_cb16222_c3/f1p0/895
F02_cb7609_c9/f1p0/1908	F02_cb7609_c9/f1p0/1908	F02_cb7609_c9/f1p0/1908	F02_cb7609_c9/f1p0/1908	NA
F02_cb16104_c0/f3p0/740	NA	NA	NA	F02_cb16104_c0/f3p0/740
F02_cb12550_c53/f1p0/1352	NA	NA	NA	F02_cb12550_c53/f1p0/1352
F01_cb16438_c24082/f2p0/1680	NA	F01_cb16438_c24082/f2p0/1680	F01_cb16438_c24082/f2p0/1680	F01_cb16438_c24082/f2p0/1680
F01_cb9755_c2/f1p0/2104	NA	F01_cb9755_c2/f1p0/2104	NA	F01_cb9755_c2/f1p0/2104
F01_cb12073_c7/f1p0/1692	NA	F01_cb12073_c7/f1p0/1692	NA	NA
F01_cb17000_c0/f3p0/942	NA	NA	NA	F01_cb17000_c0/f3p0/942
F01_cb8336_c0/f1p0/2305	F01_cb8336_c0/f1p0/2305	F01_cb8336_c0/f1p0/2305	NA	NA
F01_cb19490_c2/f1p0/1101	NA	NA	NA	F01_cb19490_c2/f1p0/1101
F01_cb19312_c2/f2p0/958	NA	NA	NA	F01_cb19312_c2/f2p0/958
F02_cb14820_c0/f1p0/864	F02_cb14820_c0/f1p0/864	F02_cb14820_c0/f1p0/864	F02_cb14820_c0/f1p0/864	F02_cb14820_c0/f1p0/864
F02_cb11041_c77085/f2p1/1924	NA	NA	F02_cb11041_c77085/f2p1/1924	NA
F02_cb19214_c0/f3p0/819	NA	NA	NA	F02_cb19214_c0/f3p0/819
F02_cb11041_c109507/f1p0/1667	NA	F02_cb11041_c109507/f1p0/1667	NA	NA
F01_cb7067_c38/f1p1/1596	NA	NA	NA	F01_cb7067_c38/f1p1/1596
F01_cb5976_c5/f1p0/2468	NA	NA	NA	F01_cb5976_c5/f1p0/2468
F01_cb15947_c11/f1p0/1537	NA	NA	NA	F01_cb15947_c11/f1p0/1537
F01_cb12951_c3/f2p1/1445	NA	NA	NA	F01_cb12951_c3/f2p1/1445
F02_cb5601_c1/f1p0/2020	F02_cb5601_c1/f1p0/2020	F02_cb5601_c1/f1p0/2020	F02_cb5601_c1/f1p0/2020	F02_cb5601_c1/f1p0/2020
F02_cb6036_c3/f1p0/2094	NA	F02_cb6036_c3/f1p0/2094	NA	NA
F01_cb4090_c5/f1p0/1910	NA	F01_cb4090_c5/f1p0/1910	F01_cb4090_c5/f1p0/1910	F01_cb4090_c5/f1p0/1910
F01_cb6689_c2/f1p0/1572	NA	NA	NA	F01_cb6689_c2/f1p0/1572
F01_cb15069_c25/f18p2/574	F01_cb15069_c25/f18p2/574	F01_cb15069_c25/f18p2/574	F01_cb15069_c25/f18p2/574	NA
F02_cb19093_c2/f1p0/946	NA	NA	NA	F02_cb19093_c2/f1p0/946
F02_cb519_c2/f1p0/2987	NA	NA	NA	F02_cb519_c2/f1p0/2987
F02_cb11041_c42841/f1p0/1411	NA	NA	NA	F02_cb11041_c42841/f1p0/1411
F01_cb13316_c4/f1p0/697	NA	NA	NA	F01_cb13316_c4/f1p0/697
F01_cb46_c4/f1p0/3769	NA	NA	NA	F01_cb46_c4/f1p0/3769
F02_cb10788_c10/f1p0/1657	NA	F02_cb10788_c10/f1p0/1657	F02_cb10788_c10/f1p0/1657	F02_cb10788_c10/f1p0/1657
F01_cb17311_c2/f2p0/688	NA	F01_cb17311_c2/f2p0/688	NA	NA
F02_cb19266_c90/f1p1/1160	F02_cb19266_c90/f1p1/1160	F02_cb19266_c90/f1p1/1160	F02_cb19266_c90/f1p1/1160	F02_cb19266_c90/f1p1/1160
F01_cb10628_c11/f1p1/807	NA	F01_cb10628_c11/f1p1/807	NA	F01_cb10628_c11/f1p1/807
F02_cb11899_c1/f1p0/1519	NA	NA	NA	F02_cb11899_c1/f1p0/1519
F02_cb11963_c1/f1p0/1400	F02_cb11963_c1/f1p0/1400	F02_cb11963_c1/f1p0/1400	F02_cb11963_c1/f1p0/1400	F02_cb11963_c1/f1p0/1400
F01_cb20743_c0/f1p0/1029	NA	NA	NA	F01_cb20743_c0/f1p0/1029
F02_cb11041_c2312/f1p0/1732	NA	NA	NA	F02_cb11041_c2312/f1p0/1732
F02_cb12823_c0/f2p1/1552	NA	F02_cb12823_c0/f2p1/1552	NA	NA
F02_cb11041_c79872/f1p0/2342	NA	NA	NA	F02_cb11041_c79872/f1p0/2342
F01_cb16_c11/f1p1/4282	NA	NA	NA	F01_cb16_c11/f1p1/4282
F02_cb10999_c8/f1p0/1304	NA	F02_cb10999_c8/f1p0/1304	NA	NA
F01_cb5915_c2/f1p0/2686	NA	F01_cb5915_c2/f1p0/2686	NA	F01_cb5915_c2/f1p0/2686
F01_cb16438_c36698/f1p0/1998	NA	NA	NA	F01_cb16438_c36698/f1p0/1998
F02_cb11959_c9/f1p0/649	F02_cb11959_c9/f1p0/649	F02_cb11959_c9/f1p0/649	F02_cb11959_c9/f1p0/649	F02_cb11959_c9/f1p0/649
F01_cb11695_c3/f2p0/1803	NA	NA	NA	F01_cb11695_c3/f2p0/1803
F01_cb20574_c6/f1p0/426	F01_cb20574_c6/f1p0/426	F01_cb20574_c6/f1p0/426	NA	F01_cb20574_c6/f1p0/426
F02_cb5081_c20/f1p0/1560	NA	NA	NA	F02_cb5081_c20/f1p0/1560
F01_cb19179_c0/f2p0/1306	NA	NA	NA	F01_cb19179_c0/f2p0/1306
F01_cb18233_c2/f1p0/1020	NA	F01_cb18233_c2/f1p0/1020	NA	NA
F01_cb6709_c2/f1p0/2390	NA	NA	NA	F01_cb6709_c2/f1p0/2390
F02_cb1827_c22/f1p0/1238	NA	NA	NA	F02_cb1827_c22/f1p0/1238
F02_cb16260_c3/f1p0/857	F02_cb16260_c3/f1p0/857	F02_cb16260_c3/f1p0/857	F02_cb16260_c3/f1p0/857	F02_cb16260_c3/f1p0/857
F01_cb8753_c4/f1p0/1425	NA	F01_cb8753_c4/f1p0/1425	NA	NA
F01_cb5719_c4/f1p0/2649	NA	NA	NA	F01_cb5719_c4/f1p0/2649
F01_cb9196_c21/f1p0/1867	NA	F01_cb9196_c21/f1p0/1867	NA	NA
F01_cb2753_c1/f1p0/3355	NA	F01_cb2753_c1/f1p0/3355	NA	NA
F02_cb764_c6/f1p0/361	F02_cb764_c6/f1p0/361	F02_cb764_c6/f1p0/361	F02_cb764_c6/f1p0/361	F02_cb764_c6/f1p0/361
F02_cb8036_c1/f1p0/2130	NA	F02_cb8036_c1/f1p0/2130	NA	NA
F02_cb8193_c0/f1p0/2261	NA	F02_cb8193_c0/f1p0/2261	NA	NA
F01_cb14462_c1/f1p0/1700	NA	F01_cb14462_c1/f1p0/1700	NA	F01_cb14462_c1/f1p0/1700
F01_cb16909_c5/f1p0/556	NA	F01_cb16909_c5/f1p0/556	F01_cb16909_c5/f1p0/556	F01_cb16909_c5/f1p0/556
F02_cb6813_c14/f1p0/3674	F02_cb6813_c14/f1p0/3674	NA	F02_cb6813_c14/f1p0/3674	NA
F01_cb16438_c33538/f1p0/2408	NA	F01_cb16438_c33538/f1p0/2408	NA	F01_cb16438_c33538/f1p0/2408
F01_cb20868_c0/f10p1/478	F01_cb20868_c0/f10p1/478	F01_cb20868_c0/f10p1/478	NA	NA
F02_cb6768_c2/f1p0/1747	NA	NA	NA	F02_cb6768_c2/f1p0/1747
F02_cb9538_c11/f1p0/1186	NA	F02_cb9538_c11/f1p0/1186	NA	F02_cb9538_c11/f1p0/1186
F01_cb19888_c2/f1p1/1574	NA	NA	NA	F01_cb19888_c2/f1p1/1574
F02_cb6422_c12/f1p0/1979	NA	F02_cb6422_c12/f1p0/1979	NA	NA
F02_cb14999_c0/f1p0/629	F02_cb14999_c0/f1p0/629	F02_cb14999_c0/f1p0/629	F02_cb14999_c0/f1p0/629	F02_cb14999_c0/f1p0/629
F02_cb17818_c1/f1p1/644	NA	F02_cb17818_c1/f1p1/644	F02_cb17818_c1/f1p1/644	NA
F02_cb9564_c6/f1p0/2085	NA	F02_cb9564_c6/f1p0/2085	NA	F02_cb9564_c6/f1p0/2085
F02_cb1569_c10/f1p0/1941	F02_cb1569_c10/f1p0/1941	F02_cb1569_c10/f1p0/1941	NA	NA
F01_cb11300_c4/f1p1/1888	NA	F01_cb11300_c4/f1p1/1888	NA	F01_cb11300_c4/f1p1/1888
F01_cb16438_c44961/f1p0/1662	NA	NA	NA	F01_cb16438_c44961/f1p0/1662
F01_cb11062_c4/f1p0/1459	NA	NA	NA	F01_cb11062_c4/f1p0/1459
F01_cb1710_c2/f1p0/2519	NA	NA	NA	F01_cb1710_c2/f1p0/2519
F01_cb19510_c2/f1p0/651	NA	NA	NA	F01_cb19510_c2/f1p0/651
F02_cb16079_c0/f2p0/1118	NA	F02_cb16079_c0/f2p0/1118	NA	NA
F01_cb8819_c2/f1p0/2399	NA	NA	NA	F01_cb8819_c2/f1p0/2399
F02_cb15584_c8/f1p0/368	F02_cb15584_c8/f1p0/368	F02_cb15584_c8/f1p0/368	F02_cb15584_c8/f1p0/368	F02_cb15584_c8/f1p0/368
F01_cb13697_c4/f1p0/1065	NA	F01_cb13697_c4/f1p0/1065	NA	NA
F02_cb134_c5/f1p0/728	F02_cb134_c5/f1p0/728	F02_cb134_c5/f1p0/728	NA	F02_cb134_c5/f1p0/728
F02_cb1506_c39/f1p0/2364	NA	F02_cb1506_c39/f1p0/2364	NA	NA
F02_cb14565_c4/f1p0/806	NA	F02_cb14565_c4/f1p0/806	F02_cb14565_c4/f1p0/806	F02_cb14565_c4/f1p0/806
F02_cb17947_c1/f1p0/1137	NA	NA	NA	F02_cb17947_c1/f1p0/1137
F02_cb15429_c9/f7p0/1112	NA	F02_cb15429_c9/f7p0/1112	NA	NA
F02_cb19505_c1/f1p0/1021	F02_cb19505_c1/f1p0/1021	F02_cb19505_c1/f1p0/1021	F02_cb19505_c1/f1p0/1021	F02_cb19505_c1/f1p0/1021
F01_cb14299_c1/f1p0/2143	F01_cb14299_c1/f1p0/2143	F01_cb14299_c1/f1p0/2143	F01_cb14299_c1/f1p0/2143	F01_cb14299_c1/f1p0/2143
F02_cb977_c22/f1p2/4045	NA	NA	NA	F02_cb977_c22/f1p2/4045
F02_cb11399_c8/f1p0/2046	NA	F02_cb11399_c8/f1p0/2046	NA	NA
F01_cb13371_c2/f1p0/1631	NA	NA	NA	F01_cb13371_c2/f1p0/1631
F02_cb3389_c26/f1p0/3859	F02_cb3389_c26/f1p0/3859	F02_cb3389_c26/f1p0/3859	F02_cb3389_c26/f1p0/3859	NA
F01_cb3611_c24/f1p0/1608	NA	NA	NA	F01_cb3611_c24/f1p0/1608
F01_cb3_c20/f1p0/4230	NA	NA	NA	F01_cb3_c20/f1p0/4230
F01_cb13543_c1/f1p0/3680	NA	F01_cb13543_c1/f1p0/3680	NA	F01_cb13543_c1/f1p0/3680
F01_cb4927_c5/f1p0/1886	NA	F01_cb4927_c5/f1p0/1886	F01_cb4927_c5/f1p0/1886	F01_cb4927_c5/f1p0/1886
F01_cb16438_c4493/f1p0/2874	NA	NA	NA	F01_cb16438_c4493/f1p0/2874
F01_cb13286_c0/f1p0/1538	F01_cb13286_c0/f1p0/1538	F01_cb13286_c0/f1p0/1538	NA	NA
F01_cb297_c1/f1p0/4331	NA	F01_cb297_c1/f1p0/4331	NA	NA
F02_cb17521_c1/f1p0/638	NA	NA	NA	F02_cb17521_c1/f1p0/638
F01_cb1665_c24/f1p0/1356	NA	NA	NA	F01_cb1665_c24/f1p0/1356
F02_cb4179_c25/f1p2/2333	NA	NA	NA	F02_cb4179_c25/f1p2/2333
F02_cb2284_c4/f1p0/3224	NA	F02_cb2284_c4/f1p0/3224	NA	NA
F01_cb22190_c0/f1p0/588	NA	NA	F01_cb22190_c0/f1p0/588	F01_cb22190_c0/f1p0/588
F01_cb17565_c5/f1p0/319	F01_cb17565_c5/f1p0/319	F01_cb17565_c5/f1p0/319	F01_cb17565_c5/f1p0/319	F01_cb17565_c5/f1p0/319
F01_cb10644_c3/f1p0/1514	NA	F01_cb10644_c3/f1p0/1514	NA	NA
F01_cb12224_c538/f1p0/2392	NA	NA	NA	F01_cb12224_c538/f1p0/2392
F01_cb2609_c2/f1p0/3220	NA	F01_cb2609_c2/f1p0/3220	NA	NA
F02_cb11041_c87158/f1p0/1745	NA	NA	NA	F02_cb11041_c87158/f1p0/1745
F02_cb13629_c1/f1p0/3049	NA	F02_cb13629_c1/f1p0/3049	NA	NA
F02_cb18255_c2/f2p0/1202	NA	NA	NA	F02_cb18255_c2/f2p0/1202
F01_cb2980_c7/f1p0/1117	NA	NA	NA	F01_cb2980_c7/f1p0/1117
F01_cb13830_c3/f1p0/1236	NA	NA	NA	F01_cb13830_c3/f1p0/1236
F01_cb13210_c1/f1p0/2194	NA	F01_cb13210_c1/f1p0/2194	NA	NA
F01_cb14179_c1/f1p0/933	NA	NA	F01_cb14179_c1/f1p0/933	F01_cb14179_c1/f1p0/933
F01_cb7183_c13/f1p0/1643	NA	F01_cb7183_c13/f1p0/1643	NA	NA
F02_cb14701_c0/f1p0/997	NA	F02_cb14701_c0/f1p0/997	NA	F02_cb14701_c0/f1p0/997
F01_cb16438_c24722/f1p0/1750	F01_cb16438_c24722/f1p0/1750	F01_cb16438_c24722/f1p0/1750	NA	NA
F01_cb4831_c11/f1p0/1639	NA	F01_cb4831_c11/f1p0/1639	NA	NA
F01_cb16731_c9/f1p1/993	NA	NA	NA	F01_cb16731_c9/f1p1/993
F02_cb7466_c17/f1p0/1032	NA	F02_cb7466_c17/f1p0/1032	NA	F02_cb7466_c17/f1p0/1032
F01_cb14722_c1/f1p0/2163	F01_cb14722_c1/f1p0/2163	F01_cb14722_c1/f1p0/2163	F01_cb14722_c1/f1p0/2163	F01_cb14722_c1/f1p0/2163
F01_cb13412_c2/f1p0/2456	NA	F01_cb13412_c2/f1p0/2456	NA	NA
F01_cb644_c32/f1p0/2138	NA	F01_cb644_c32/f1p0/2138	NA	NA
F01_cb21548_c0/f2p0/943	NA	F01_cb21548_c0/f2p0/943	F01_cb21548_c0/f2p0/943	NA
F02_cb3126_c0/f1p0/3210	F02_cb3126_c0/f1p0/3210	F02_cb3126_c0/f1p0/3210	NA	NA
F02_cb6746_c8/f4p0/598	NA	F02_cb6746_c8/f4p0/598	F02_cb6746_c8/f4p0/598	NA
F01_cb3920_c11/f1p0/1958	NA	F01_cb3920_c11/f1p0/1958	NA	NA
F02_cb11041_c3815/f1p0/3331	NA	F02_cb11041_c3815/f1p0/3331	NA	NA
F02_cb11041_c89470/f1p0/3686	NA	NA	NA	F02_cb11041_c89470/f1p0/3686
F01_cb7771_c6/f1p0/2052	NA	NA	NA	F01_cb7771_c6/f1p0/2052
F01_cb12375_c4/f1p0/1705	NA	NA	NA	F01_cb12375_c4/f1p0/1705
F01_cb6500_c8/f1p0/1011	NA	NA	NA	F01_cb6500_c8/f1p0/1011
F02_cb11041_c55577/f7p2/2029	NA	F02_cb11041_c55577/f7p2/2029	F02_cb11041_c55577/f7p2/2029	F02_cb11041_c55577/f7p2/2029
F01_cb12196_c2/f1p0/1422	F01_cb12196_c2/f1p0/1422	F01_cb12196_c2/f1p0/1422	F01_cb12196_c2/f1p0/1422	NA
F01_cb21136_c0/f1p0/372	NA	F01_cb21136_c0/f1p0/372	NA	F01_cb21136_c0/f1p0/372
F02_cb11474_c1/f1p0/1744	NA	NA	NA	F02_cb11474_c1/f1p0/1744
F02_cb8459_c6/f1p0/1742	NA	F02_cb8459_c6/f1p0/1742	NA	NA
F02_cb480_c85/f1p0/851	NA	NA	NA	F02_cb480_c85/f1p0/851
F01_cb2542_c1/f1p0/2860	NA	F01_cb2542_c1/f1p0/2860	NA	NA
F01_cb895_c3/f1p0/4031	NA	F01_cb895_c3/f1p0/4031	NA	NA
F01_cb20364_c0/f3p0/1166	NA	NA	NA	F01_cb20364_c0/f3p0/1166
F02_cb96_c6/f1p0/2944	NA	F02_cb96_c6/f1p0/2944	NA	NA
F01_cb13860_c11/f1p0/636	NA	F01_cb13860_c11/f1p0/636	NA	F01_cb13860_c11/f1p0/636
F02_cb5248_c2/f1p0/2759	NA	NA	NA	F02_cb5248_c2/f1p0/2759
F02_cb12729_c0/f1p0/1551	NA	F02_cb12729_c0/f1p0/1551	NA	NA
F01_cb5547_c18/f1p0/2495	NA	NA	NA	F01_cb5547_c18/f1p0/2495
F02_cb12616_c15/f1p0/915	NA	NA	NA	F02_cb12616_c15/f1p0/915
F01_cb16438_c44969/f1p0/2432	NA	F01_cb16438_c44969/f1p0/2432	NA	F01_cb16438_c44969/f1p0/2432
F01_cb14439_c1/f1p0/2051	NA	NA	NA	F01_cb14439_c1/f1p0/2051
F01_cb19682_c478/f2p0/590	F01_cb19682_c478/f2p0/590	F01_cb19682_c478/f2p0/590	F01_cb19682_c478/f2p0/590	F01_cb19682_c478/f2p0/590
F01_cb18723_c0/f1p0/390	F01_cb18723_c0/f1p0/390	F01_cb18723_c0/f1p0/390	F01_cb18723_c0/f1p0/390	F01_cb18723_c0/f1p0/390
F02_cb2344_c7/f1p2/1804	NA	F02_cb2344_c7/f1p2/1804	NA	NA
F02_cb11041_c78286/f1p0/2257	NA	F02_cb11041_c78286/f1p0/2257	F02_cb11041_c78286/f1p0/2257	NA
F01_cb13375_c206/f1p0/1801	NA	F01_cb13375_c206/f1p0/1801	NA	NA
F02_cb1661_c9/f1p0/745	F02_cb1661_c9/f1p0/745	F02_cb1661_c9/f1p0/745	F02_cb1661_c9/f1p0/745	F02_cb1661_c9/f1p0/745
F01_cb20522_c0/f1p0/1191	NA	NA	NA	F01_cb20522_c0/f1p0/1191
F01_cb9543_c3/f1p1/1695	NA	NA	NA	F01_cb9543_c3/f1p1/1695
F02_cb3732_c10/f1p0/598	F02_cb3732_c10/f1p0/598	F02_cb3732_c10/f1p0/598	NA	NA
F01_cb19585_c3/f1p0/734	NA	F01_cb19585_c3/f1p0/734	F01_cb19585_c3/f1p0/734	F01_cb19585_c3/f1p0/734
F01_cb13891_c2/f1p0/1432	F01_cb13891_c2/f1p0/1432	F01_cb13891_c2/f1p0/1432	NA	NA
F01_cb17556_c4/f1p0/1473	NA	F01_cb17556_c4/f1p0/1473	NA	NA
F02_cb16281_c1/f1p0/888	NA	F02_cb16281_c1/f1p0/888	NA	F02_cb16281_c1/f1p0/888
F01_cb11284_c5/f1p0/1696	NA	NA	NA	F01_cb11284_c5/f1p0/1696
F01_cb15705_c14/f1p0/824	F01_cb15705_c14/f1p0/824	F01_cb15705_c14/f1p0/824	F01_cb15705_c14/f1p0/824	F01_cb15705_c14/f1p0/824
F01_cb18848_c5/f7p0/1099	NA	NA	NA	F01_cb18848_c5/f7p0/1099
F02_cb16831_c1/f2p0/854	NA	F02_cb16831_c1/f2p0/854	NA	NA
F02_cb9542_c0/f1p0/2070	NA	NA	NA	F02_cb9542_c0/f1p0/2070
F01_cb2946_c4/f2p0/2240	NA	NA	NA	F01_cb2946_c4/f2p0/2240
F01_cb6355_c42/f1p0/1467	NA	NA	NA	F01_cb6355_c42/f1p0/1467
F01_cb2507_c15/f1p0/451	F01_cb2507_c15/f1p0/451	F01_cb2507_c15/f1p0/451	NA	F01_cb2507_c15/f1p0/451
F01_cb16438_c44836/f1p0/1790	NA	F01_cb16438_c44836/f1p0/1790	NA	NA
F02_cb14573_c1/f1p0/2227	F02_cb14573_c1/f1p0/2227	F02_cb14573_c1/f1p0/2227	NA	NA
F02_cb17414_c3/f2p0/652	NA	F02_cb17414_c3/f2p0/652	F02_cb17414_c3/f2p0/652	NA
F01_cb2217_c15/f1p0/1357	NA	F01_cb2217_c15/f1p0/1357	NA	NA
F02_cb16040_c3/f16p1/453	NA	F02_cb16040_c3/f16p1/453	NA	NA
F02_cb10726_c6/f1p0/1341	NA	F02_cb10726_c6/f1p0/1341	NA	F02_cb10726_c6/f1p0/1341
F02_cb18648_c0/f1p0/754	F02_cb18648_c0/f1p0/754	F02_cb18648_c0/f1p0/754	F02_cb18648_c0/f1p0/754	F02_cb18648_c0/f1p0/754
F01_cb3032_c5/f1p0/1744	NA	F01_cb3032_c5/f1p0/1744	NA	F01_cb3032_c5/f1p0/1744
F01_cb15518_c2/f1p0/562	NA	F01_cb15518_c2/f1p0/562	NA	NA
F01_cb6823_c2/f1p0/2440	F01_cb6823_c2/f1p0/2440	F01_cb6823_c2/f1p0/2440	NA	NA
F02_cb4535_c12/f2p1/2520	NA	NA	NA	F02_cb4535_c12/f2p1/2520
F01_cb8373_c14/f1p0/1490	F01_cb8373_c14/f1p0/1490	F01_cb8373_c14/f1p0/1490	NA	F01_cb8373_c14/f1p0/1490
F01_cb16100_c0/f1p0/1086	NA	F01_cb16100_c0/f1p0/1086	NA	NA
F01_cb19496_c180/f2p0/905	NA	F01_cb19496_c180/f2p0/905	F01_cb19496_c180/f2p0/905	F01_cb19496_c180/f2p0/905
F02_cb850_c84/f1p0/1693	F02_cb850_c84/f1p0/1693	F02_cb850_c84/f1p0/1693	NA	F02_cb850_c84/f1p0/1693
F01_cb21688_c99/f1p0/601	F01_cb21688_c99/f1p0/601	F01_cb21688_c99/f1p0/601	F01_cb21688_c99/f1p0/601	F01_cb21688_c99/f1p0/601
F02_cb18627_c3/f1p0/414	NA	F02_cb18627_c3/f1p0/414	NA	F02_cb18627_c3/f1p0/414
F01_cb8603_c2/f1p0/2050	NA	NA	NA	F01_cb8603_c2/f1p0/2050
F01_cb16115_c10/f8p0/459	F01_cb16115_c10/f8p0/459	NA	NA	NA
F01_cb13786_c0/f3p0/1283	NA	NA	NA	F01_cb13786_c0/f3p0/1283
F02_cb5839_c1/f1p0/2612	NA	F02_cb5839_c1/f1p0/2612	F02_cb5839_c1/f1p0/2612	NA
F01_cb21450_c2/f1p0/538	NA	F01_cb21450_c2/f1p0/538	NA	F01_cb21450_c2/f1p0/538
F01_cb19712_c0/f1p0/1293	NA	NA	F01_cb19712_c0/f1p0/1293	NA
F02_cb3911_c1/f2p0/568	F02_cb3911_c1/f2p0/568	F02_cb3911_c1/f2p0/568	F02_cb3911_c1/f2p0/568	F02_cb3911_c1/f2p0/568
F01_cb209_c1/f1p0/4332	NA	F01_cb209_c1/f1p0/4332	NA	NA
F02_cb12408_c3/f1p0/1535	NA	NA	NA	F02_cb12408_c3/f1p0/1535
F01_cb5569_c11/f1p0/2743	NA	NA	NA	F01_cb5569_c11/f1p0/2743
F02_cb4636_c1/f1p0/3089	NA	NA	F02_cb4636_c1/f1p0/3089	NA
F02_cb18445_c2/f1p0/544	NA	NA	F02_cb18445_c2/f1p0/544	F02_cb18445_c2/f1p0/544
F01_cb7252_c3/f1p0/943	NA	F01_cb7252_c3/f1p0/943	NA	F01_cb7252_c3/f1p0/943
F02_cb10251_c2/f1p0/383	F02_cb10251_c2/f1p0/383	F02_cb10251_c2/f1p0/383	F02_cb10251_c2/f1p0/383	F02_cb10251_c2/f1p0/383
F02_cb19699_c0/f1p0/5811	NA	NA	NA	F02_cb19699_c0/f1p0/5811
F01_cb17284_c1/f2p0/756	NA	NA	NA	F01_cb17284_c1/f2p0/756
F01_cb20435_c91/f1p0/1586	F01_cb20435_c91/f1p0/1586	F01_cb20435_c91/f1p0/1586	F01_cb20435_c91/f1p0/1586	F01_cb20435_c91/f1p0/1586
F02_cb11041_c4866/f1p0/2639	F02_cb11041_c4866/f1p0/2639	F02_cb11041_c4866/f1p0/2639	F02_cb11041_c4866/f1p0/2639	F02_cb11041_c4866/f1p0/2639
F01_cb122_c17/f1p0/4951	NA	NA	NA	F01_cb122_c17/f1p0/4951
F01_cb21688_c11/f7p0/412	F01_cb21688_c11/f7p0/412	F01_cb21688_c11/f7p0/412	F01_cb21688_c11/f7p0/412	F01_cb21688_c11/f7p0/412
F01_cb3396_c6/f1p0/3147	NA	NA	NA	F01_cb3396_c6/f1p0/3147
F02_cb4349_c22/f1p0/2330	NA	NA	NA	F02_cb4349_c22/f1p0/2330
F01_cb16438_c919/f2p1/2585	NA	F01_cb16438_c919/f2p1/2585	NA	F01_cb16438_c919/f2p1/2585
F01_cb20748_c1/f1p1/755	NA	NA	NA	F01_cb20748_c1/f1p1/755
F01_cb18142_c4/f3p1/484	NA	NA	NA	F01_cb18142_c4/f3p1/484
F02_cb13355_c3/f1p0/425	F02_cb13355_c3/f1p0/425	F02_cb13355_c3/f1p0/425	F02_cb13355_c3/f1p0/425	F02_cb13355_c3/f1p0/425
F01_cb22074_c0/f2p0/463	NA	F01_cb22074_c0/f2p0/463	NA	NA
F01_cb16438_c20437/f1p0/1945	NA	NA	F01_cb16438_c20437/f1p0/1945	NA
F02_cb9176_c3/f1p0/1973	NA	NA	NA	F02_cb9176_c3/f1p0/1973
F01_cb1814_c14/f1p1/2067	NA	NA	NA	F01_cb1814_c14/f1p1/2067
F01_cb16438_c2469/f1p0/1953	NA	F01_cb16438_c2469/f1p0/1953	NA	F01_cb16438_c2469/f1p0/1953
F01_cb6881_c34/f1p0/662	NA	F01_cb6881_c34/f1p0/662	NA	NA
F01_cb17913_c4/f1p0/1479	NA	F01_cb17913_c4/f1p0/1479	NA	NA
F02_cb13573_c1/f1p0/1422	NA	NA	NA	F02_cb13573_c1/f1p0/1422
F01_cb8192_c15/f1p0/1163	NA	F01_cb8192_c15/f1p0/1163	NA	F01_cb8192_c15/f1p0/1163
F01_cb9348_c8/f1p0/2064	NA	NA	NA	F01_cb9348_c8/f1p0/2064
F01_cb14548_c0/f1p0/1562	NA	NA	NA	F01_cb14548_c0/f1p0/1562
F02_cb11041_c3258/f1p1/1753	NA	F02_cb11041_c3258/f1p1/1753	NA	NA
F02_cb624_c2/f1p0/3894	NA	NA	NA	F02_cb624_c2/f1p0/3894
F01_cb6333_c1/f1p0/3154	NA	F01_cb6333_c1/f1p0/3154	NA	F01_cb6333_c1/f1p0/3154
F01_cb12582_c3/f1p0/1691	NA	NA	NA	F01_cb12582_c3/f1p0/1691
F02_cb2343_c14/f1p0/1870	NA	F02_cb2343_c14/f1p0/1870	NA	NA
F02_cb8970_c8/f1p0/1998	NA	NA	NA	F02_cb8970_c8/f1p0/1998
F02_cb9404_c1/f1p1/2090	F02_cb9404_c1/f1p1/2090	F02_cb9404_c1/f1p1/2090	NA	NA
F01_cb21688_c241/f1p0/541	F01_cb21688_c241/f1p0/541	F01_cb21688_c241/f1p0/541	F01_cb21688_c241/f1p0/541	F01_cb21688_c241/f1p0/541
F01_cb9344_c5/f1p0/811	NA	F01_cb9344_c5/f1p0/811	F01_cb9344_c5/f1p0/811	F01_cb9344_c5/f1p0/811
F01_cb20483_c2/f1p0/310	F01_cb20483_c2/f1p0/310	F01_cb20483_c2/f1p0/310	F01_cb20483_c2/f1p0/310	F01_cb20483_c2/f1p0/310
F01_cb1290_c23/f1p0/734	NA	F01_cb1290_c23/f1p0/734	NA	NA
F01_cb14123_c1/f3p0/1334	NA	NA	NA	F01_cb14123_c1/f3p0/1334
F02_cb11041_c18091/f1p0/2813	NA	F02_cb11041_c18091/f1p0/2813	F02_cb11041_c18091/f1p0/2813	NA
F01_cb7917_c9/f1p0/2078	F01_cb7917_c9/f1p0/2078	F01_cb7917_c9/f1p0/2078	F01_cb7917_c9/f1p0/2078	F01_cb7917_c9/f1p0/2078
F01_cb16438_c36523/f1p0/1678	NA	F01_cb16438_c36523/f1p0/1678	NA	NA
F02_cb2173_c9/f1p0/2852	NA	NA	NA	F02_cb2173_c9/f1p0/2852
F01_cb12195_c11/f1p0/2074	F01_cb12195_c11/f1p0/2074	F01_cb12195_c11/f1p0/2074	NA	F01_cb12195_c11/f1p0/2074
F01_cb13173_c5/f1p0/2360	NA	F01_cb13173_c5/f1p0/2360	NA	NA
F02_cb15196_c7/f6p0/585	NA	F02_cb15196_c7/f6p0/585	NA	NA
F01_cb17765_c2/f1p0/344	F01_cb17765_c2/f1p0/344	F01_cb17765_c2/f1p0/344	F01_cb17765_c2/f1p0/344	F01_cb17765_c2/f1p0/344
F02_cb8217_c27/f1p0/994	NA	F02_cb8217_c27/f1p0/994	NA	NA
F02_cb11041_c43152/f1p0/2407	NA	F02_cb11041_c43152/f1p0/2407	F02_cb11041_c43152/f1p0/2407	F02_cb11041_c43152/f1p0/2407
F02_cb14719_c0/f1p0/360	F02_cb14719_c0/f1p0/360	F02_cb14719_c0/f1p0/360	F02_cb14719_c0/f1p0/360	F02_cb14719_c0/f1p0/360
F02_cb19263_c1/f1p0/388	F02_cb19263_c1/f1p0/388	F02_cb19263_c1/f1p0/388	NA	NA
F02_cb11740_c175/f1p0/2305	NA	F02_cb11740_c175/f1p0/2305	F02_cb11740_c175/f1p0/2305	F02_cb11740_c175/f1p0/2305
F01_cb13570_c5/f1p0/813	NA	F01_cb13570_c5/f1p0/813	NA	NA
F01_cb713_c6/f1p0/4110	NA	F01_cb713_c6/f1p0/4110	NA	NA
F01_cb13898_c1/f1p0/2988	NA	F01_cb13898_c1/f1p0/2988	NA	NA
F01_cb13994_c1/f1p0/4295	NA	F01_cb13994_c1/f1p0/4295	NA	NA
F02_cb9471_c5/f1p0/1914	NA	F02_cb9471_c5/f1p0/1914	NA	F02_cb9471_c5/f1p0/1914
F02_cb13240_c54/f1p0/960	F02_cb13240_c54/f1p0/960	F02_cb13240_c54/f1p0/960	F02_cb13240_c54/f1p0/960	F02_cb13240_c54/f1p0/960
F02_cb11041_c81754/f1p0/1465	F02_cb11041_c81754/f1p0/1465	F02_cb11041_c81754/f1p0/1465	NA	F02_cb11041_c81754/f1p0/1465
F01_cb4201_c19/f1p0/1994	NA	NA	NA	F01_cb4201_c19/f1p0/1994
F02_cb2897_c5/f1p0/1248	F02_cb2897_c5/f1p0/1248	F02_cb2897_c5/f1p0/1248	F02_cb2897_c5/f1p0/1248	F02_cb2897_c5/f1p0/1248
F02_cb11041_c2995/f1p0/2936	NA	F02_cb11041_c2995/f1p0/2936	NA	NA
F01_cb12274_c34/f1p0/2008	F01_cb12274_c34/f1p0/2008	F01_cb12274_c34/f1p0/2008	F01_cb12274_c34/f1p0/2008	F01_cb12274_c34/f1p0/2008
F02_cb17885_c0/f1p0/794	NA	F02_cb17885_c0/f1p0/794	F02_cb17885_c0/f1p0/794	F02_cb17885_c0/f1p0/794
F01_cb14786_c2/f1p0/1591	NA	F01_cb14786_c2/f1p0/1591	NA	NA
F02_cb11041_c83391/f1p0/2417	NA	NA	NA	F02_cb11041_c83391/f1p0/2417
F02_cb1236_c7/f1p0/2505	NA	NA	NA	F02_cb1236_c7/f1p0/2505
F02_cb19266_c213/f7p1/493	F02_cb19266_c213/f7p1/493	F02_cb19266_c213/f7p1/493	F02_cb19266_c213/f7p1/493	F02_cb19266_c213/f7p1/493
F01_cb15609_c3/f1p0/1440	NA	F01_cb15609_c3/f1p0/1440	NA	NA
F02_cb17257_c1/f2p0/669	NA	F02_cb17257_c1/f2p0/669	NA	NA
F02_cb11041_c42132/f1p0/2538	NA	F02_cb11041_c42132/f1p0/2538	F02_cb11041_c42132/f1p0/2538	NA
F01_cb15812_c16/f6p0/476	NA	F01_cb15812_c16/f6p0/476	NA	NA
F02_cb11041_c1318/f1p0/1738	NA	F02_cb11041_c1318/f1p0/1738	NA	NA
F01_cb21688_c246/f1p0/561	F01_cb21688_c246/f1p0/561	F01_cb21688_c246/f1p0/561	F01_cb21688_c246/f1p0/561	F01_cb21688_c246/f1p0/561
F02_cb16769_c1/f2p0/548	F02_cb16769_c1/f2p0/548	F02_cb16769_c1/f2p0/548	NA	F02_cb16769_c1/f2p0/548
F02_cb8254_c3/f1p0/1892	NA	F02_cb8254_c3/f1p0/1892	NA	F02_cb8254_c3/f1p0/1892
F01_cb12645_c3/f1p0/1685	NA	F01_cb12645_c3/f1p0/1685	NA	NA
F02_cb3719_c6/f2p1/2253	NA	NA	NA	F02_cb3719_c6/f2p1/2253
F01_cb16036_c4/f1p0/706	NA	NA	NA	F01_cb16036_c4/f1p0/706
F02_cb8864_c32/f1p0/1995	F02_cb8864_c32/f1p0/1995	F02_cb8864_c32/f1p0/1995	F02_cb8864_c32/f1p0/1995	F02_cb8864_c32/f1p0/1995
F02_cb13787_c15/f1p2/1058	NA	NA	NA	F02_cb13787_c15/f1p2/1058
F01_cb7478_c5/f1p0/3318	NA	F01_cb7478_c5/f1p0/3318	NA	NA
F01_cb19496_c169/f2p0/1081	NA	F01_cb19496_c169/f2p0/1081	F01_cb19496_c169/f2p0/1081	F01_cb19496_c169/f2p0/1081
F01_cb18505_c0/f2p0/1383	NA	F01_cb18505_c0/f2p0/1383	F01_cb18505_c0/f2p0/1383	F01_cb18505_c0/f2p0/1383
F02_cb16162_c4/f1p0/652	F02_cb16162_c4/f1p0/652	F02_cb16162_c4/f1p0/652	NA	F02_cb16162_c4/f1p0/652
F01_cb16438_c34498/f1p0/3742	NA	F01_cb16438_c34498/f1p0/3742	NA	F01_cb16438_c34498/f1p0/3742
F02_cb19646_c0/f1p0/375	F02_cb19646_c0/f1p0/375	F02_cb19646_c0/f1p0/375	F02_cb19646_c0/f1p0/375	F02_cb19646_c0/f1p0/375
F01_cb2064_c0/f2p0/3559	NA	F01_cb2064_c0/f2p0/3559	NA	F01_cb2064_c0/f2p0/3559
F02_cb18596_c0/f1p0/409	NA	F02_cb18596_c0/f1p0/409	F02_cb18596_c0/f1p0/409	F02_cb18596_c0/f1p0/409
F02_cb11041_c3828/f1p0/1937	NA	F02_cb11041_c3828/f1p0/1937	NA	NA
F02_cb363_c19/f1p0/4253	NA	NA	NA	F02_cb363_c19/f1p0/4253
F01_cb8657_c24/f1p0/1294	NA	NA	NA	F01_cb8657_c24/f1p0/1294
F01_cb16514_c1/f1p0/419	NA	NA	F01_cb16514_c1/f1p0/419	F01_cb16514_c1/f1p0/419
F01_cb16438_c3307/f1p0/3037	NA	F01_cb16438_c3307/f1p0/3037	NA	F01_cb16438_c3307/f1p0/3037
F02_cb12799_c5/f1p0/1325	NA	NA	NA	F02_cb12799_c5/f1p0/1325
F02_cb5911_c2/f1p0/1453	NA	NA	NA	F02_cb5911_c2/f1p0/1453
F02_cb18390_c5/f1p0/8971	F02_cb18390_c5/f1p0/8971	NA	NA	NA
F01_cb990_c9/f1p0/3847	NA	NA	NA	F01_cb990_c9/f1p0/3847
F01_cb15373_c6/f1p0/559	F01_cb15373_c6/f1p0/559	F01_cb15373_c6/f1p0/559	NA	F01_cb15373_c6/f1p0/559
F01_cb13978_c2/f1p0/1649	NA	F01_cb13978_c2/f1p0/1649	NA	F01_cb13978_c2/f1p0/1649
F01_cb13845_c3/f1p0/1068	NA	NA	NA	F01_cb13845_c3/f1p0/1068
F02_cb9386_c8/f1p0/1938	NA	F02_cb9386_c8/f1p0/1938	NA	NA
F02_cb13583_c20/f1p0/2621	NA	NA	NA	F02_cb13583_c20/f1p0/2621
F02_cb17782_c4/f1p0/533	F02_cb17782_c4/f1p0/533	F02_cb17782_c4/f1p0/533	NA	F02_cb17782_c4/f1p0/533
F01_cb5164_c2/f1p0/2444	F01_cb5164_c2/f1p0/2444	F01_cb5164_c2/f1p0/2444	NA	NA
F01_cb9788_c38/f1p0/4012	NA	F01_cb9788_c38/f1p0/4012	NA	NA
F01_cb12242_c2/f1p0/1809	NA	F01_cb12242_c2/f1p0/1809	NA	NA
F02_cb12207_c1/f1p0/2262	NA	NA	NA	F02_cb12207_c1/f1p0/2262
F02_cb11041_c84030/f1p0/2624	NA	NA	NA	F02_cb11041_c84030/f1p0/2624
F02_cb3546_c22/f1p0/2344	NA	F02_cb3546_c22/f1p0/2344	NA	F02_cb3546_c22/f1p0/2344
F01_cb13069_c39/f1p0/942	NA	F01_cb13069_c39/f1p0/942	NA	NA
F01_cb9123_c13/f1p0/2009	NA	NA	NA	F01_cb9123_c13/f1p0/2009
F02_cb12687_c4/f1p1/1529	NA	NA	NA	F02_cb12687_c4/f1p1/1529
F01_cb2629_c3/f1p0/2268	NA	F01_cb2629_c3/f1p0/2268	NA	F01_cb2629_c3/f1p0/2268
F01_cb19496_c151/f3p0/833	F01_cb19496_c151/f3p0/833	F01_cb19496_c151/f3p0/833	F01_cb19496_c151/f3p0/833	F01_cb19496_c151/f3p0/833
F02_cb14858_c0/f1p0/615	NA	F02_cb14858_c0/f1p0/615	NA	NA
F02_cb8138_c8/f1p0/1514	NA	F02_cb8138_c8/f1p0/1514	F02_cb8138_c8/f1p0/1514	F02_cb8138_c8/f1p0/1514
F02_cb17241_c1/f1p0/530	F02_cb17241_c1/f1p0/530	F02_cb17241_c1/f1p0/530	F02_cb17241_c1/f1p0/530	NA
F02_cb8972_c4/f1p0/402	F02_cb8972_c4/f1p0/402	F02_cb8972_c4/f1p0/402	F02_cb8972_c4/f1p0/402	F02_cb8972_c4/f1p0/402
F02_cb1624_c11/f1p0/3674	NA	NA	NA	F02_cb1624_c11/f1p0/3674
F01_cb9358_c0/f6p1/2180	NA	NA	NA	F01_cb9358_c0/f6p1/2180
F01_cb17460_c0/f5p0/457	NA	NA	F01_cb17460_c0/f5p0/457	F01_cb17460_c0/f5p0/457
F01_cb1529_c6/f1p0/3102	NA	F01_cb1529_c6/f1p0/3102	NA	NA
F01_cb16241_c4/f4p0/693	NA	F01_cb16241_c4/f4p0/693	NA	F01_cb16241_c4/f4p0/693
F01_cb10971_c7/f1p0/601	NA	F01_cb10971_c7/f1p0/601	NA	F01_cb10971_c7/f1p0/601
F01_cb20144_c0/f7p0/750	NA	NA	F01_cb20144_c0/f7p0/750	F01_cb20144_c0/f7p0/750
F02_cb12151_c1/f1p0/1624	NA	F02_cb12151_c1/f1p0/1624	NA	NA
F02_cb10784_c2/f1p0/1870	NA	F02_cb10784_c2/f1p0/1870	NA	NA
F01_cb16438_c2121/f1p0/3215	NA	F01_cb16438_c2121/f1p0/3215	NA	F01_cb16438_c2121/f1p0/3215
F01_cb12383_c1/f1p0/1690	NA	F01_cb12383_c1/f1p0/1690	NA	NA
F02_cb1153_c9/f1p0/2907	NA	F02_cb1153_c9/f1p0/2907	NA	NA
F01_cb19498_c1/f1p0/445	NA	F01_cb19498_c1/f1p0/445	NA	F01_cb19498_c1/f1p0/445
F01_cb16438_c40187/f1p0/2129	F01_cb16438_c40187/f1p0/2129	F01_cb16438_c40187/f1p0/2129	F01_cb16438_c40187/f1p0/2129	F01_cb16438_c40187/f1p0/2129
F01_cb4367_c8/f1p0/2371	F01_cb4367_c8/f1p0/2371	F01_cb4367_c8/f1p0/2371	F01_cb4367_c8/f1p0/2371	NA
F01_cb19410_c1/f1p0/508	F01_cb19410_c1/f1p0/508	F01_cb19410_c1/f1p0/508	NA	NA
F01_cb6493_c0/f1p0/2581	NA	NA	F01_cb6493_c0/f1p0/2581	NA
F02_cb11041_c4303/f1p0/1367	F02_cb11041_c4303/f1p0/1367	F02_cb11041_c4303/f1p0/1367	NA	NA
F01_cb5986_c5/f1p0/1903	NA	NA	NA	F01_cb5986_c5/f1p0/1903
F01_cb14106_c0/f2p0/448	F01_cb14106_c0/f2p0/448	NA	NA	F01_cb14106_c0/f2p0/448
F01_cb16438_c2860/f1p0/2329	NA	F01_cb16438_c2860/f1p0/2329	F01_cb16438_c2860/f1p0/2329	NA
F01_cb11139_c2/f1p0/1912	NA	F01_cb11139_c2/f1p0/1912	NA	NA
F02_cb18318_c0/f1p0/346	F02_cb18318_c0/f1p0/346	F02_cb18318_c0/f1p0/346	F02_cb18318_c0/f1p0/346	F02_cb18318_c0/f1p0/346
F01_cb22014_c1/f1p0/455	NA	F01_cb22014_c1/f1p0/455	NA	NA
F01_cb16438_c45563/f1p0/2526	NA	NA	NA	F01_cb16438_c45563/f1p0/2526
F01_cb16438_c10679/f1p0/3455	NA	F01_cb16438_c10679/f1p0/3455	NA	NA
F01_cb1652_c0/f1p1/3716	NA	NA	NA	F01_cb1652_c0/f1p1/3716
F01_cb17745_c1/f1p0/1334	NA	F01_cb17745_c1/f1p0/1334	NA	NA
F02_cb8204_c6/f1p0/2074	NA	NA	NA	F02_cb8204_c6/f1p0/2074
F02_cb6494_c6/f1p1/2347	NA	NA	NA	F02_cb6494_c6/f1p1/2347
F01_cb21552_c0/f1p0/584	NA	F01_cb21552_c0/f1p0/584	F01_cb21552_c0/f1p0/584	F01_cb21552_c0/f1p0/584
F01_cb19980_c1/f1p0/604	NA	NA	NA	F01_cb19980_c1/f1p0/604
F01_cb12224_c91/f1p0/1955	NA	F01_cb12224_c91/f1p0/1955	NA	NA
F01_cb19682_c561/f1p0/1272	NA	NA	NA	F01_cb19682_c561/f1p0/1272
F02_cb12137_c1/f1p0/2952	NA	NA	F02_cb12137_c1/f1p0/2952	F02_cb12137_c1/f1p0/2952
F01_cb15776_c0/f5p1/845	NA	F01_cb15776_c0/f5p1/845	NA	F01_cb15776_c0/f5p1/845
F01_cb19264_c1/f2p0/871	NA	F01_cb19264_c1/f2p0/871	NA	F01_cb19264_c1/f2p0/871
F02_cb15042_c0/f1p0/1270	NA	F02_cb15042_c0/f1p0/1270	F02_cb15042_c0/f1p0/1270	NA
F02_cb3941_c3/f1p0/1855	NA	NA	NA	F02_cb3941_c3/f1p0/1855
F02_cb18411_c3/f1p0/1016	F02_cb18411_c3/f1p0/1016	F02_cb18411_c3/f1p0/1016	F02_cb18411_c3/f1p0/1016	F02_cb18411_c3/f1p0/1016
F01_cb21735_c0/f1p0/952	F01_cb21735_c0/f1p0/952	F01_cb21735_c0/f1p0/952	NA	F01_cb21735_c0/f1p0/952
F02_cb13335_c6/f1p0/1466	NA	F02_cb13335_c6/f1p0/1466	F02_cb13335_c6/f1p0/1466	NA
F01_cb18240_c7/f1p0/1239	NA	NA	NA	F01_cb18240_c7/f1p0/1239
F01_cb14510_c1/f1p0/1639	NA	F01_cb14510_c1/f1p0/1639	NA	NA
F01_cb10739_c0/f2p0/1597	NA	NA	NA	F01_cb10739_c0/f2p0/1597
F01_cb19078_c1/f1p0/843	NA	NA	NA	F01_cb19078_c1/f1p0/843
F02_cb11041_c41932/f1p0/1878	NA	NA	F02_cb11041_c41932/f1p0/1878	F02_cb11041_c41932/f1p0/1878
F02_cb2782_c7/f1p0/2860	NA	NA	NA	F02_cb2782_c7/f1p0/2860
F01_cb17114_c50/f1p0/1100	NA	NA	F01_cb17114_c50/f1p0/1100	F01_cb17114_c50/f1p0/1100
F01_cb20907_c2/f1p0/1445	F01_cb20907_c2/f1p0/1445	F01_cb20907_c2/f1p0/1445	F01_cb20907_c2/f1p0/1445	F01_cb20907_c2/f1p0/1445
F01_cb7203_c1/f1p0/2394	NA	NA	NA	F01_cb7203_c1/f1p0/2394
F02_cb11041_c74364/f2p0/1407	F02_cb11041_c74364/f2p0/1407	F02_cb11041_c74364/f2p0/1407	F02_cb11041_c74364/f2p0/1407	F02_cb11041_c74364/f2p0/1407
F01_cb17816_c1/f1p0/662	F01_cb17816_c1/f1p0/662	F01_cb17816_c1/f1p0/662	F01_cb17816_c1/f1p0/662	F01_cb17816_c1/f1p0/662
F01_cb17512_c2/f1p0/715	NA	NA	NA	F01_cb17512_c2/f1p0/715
F01_cb1166_c23/f1p0/4084	NA	NA	NA	F01_cb1166_c23/f1p0/4084
F02_cb7192_c5/f1p0/2426	NA	F02_cb7192_c5/f1p0/2426	NA	NA
F01_cb16438_c18529/f1p0/2042	F01_cb16438_c18529/f1p0/2042	F01_cb16438_c18529/f1p0/2042	F01_cb16438_c18529/f1p0/2042	F01_cb16438_c18529/f1p0/2042
F01_cb16363_c3/f1p0/976	F01_cb16363_c3/f1p0/976	F01_cb16363_c3/f1p0/976	F01_cb16363_c3/f1p0/976	F01_cb16363_c3/f1p0/976
F01_cb22138_c0/f2p0/480	NA	F01_cb22138_c0/f2p0/480	F01_cb22138_c0/f2p0/480	F01_cb22138_c0/f2p0/480
F01_cb7587_c4/f1p0/1480	NA	F01_cb7587_c4/f1p0/1480	NA	NA
F01_cb19253_c7/f1p0/606	F01_cb19253_c7/f1p0/606	F01_cb19253_c7/f1p0/606	NA	F01_cb19253_c7/f1p0/606
F01_cb16438_c24870/f1p3/4168	NA	NA	NA	F01_cb16438_c24870/f1p3/4168
F02_cb11041_c4522/f1p0/2091	NA	NA	NA	F02_cb11041_c4522/f1p0/2091
F02_cb11041_c76685/f1p0/1776	F02_cb11041_c76685/f1p0/1776	F02_cb11041_c76685/f1p0/1776	F02_cb11041_c76685/f1p0/1776	F02_cb11041_c76685/f1p0/1776
F02_cb7841_c5/f1p0/2070	NA	F02_cb7841_c5/f1p0/2070	NA	F02_cb7841_c5/f1p0/2070
F01_cb18053_c0/f2p0/349	F01_cb18053_c0/f2p0/349	F01_cb18053_c0/f2p0/349	F01_cb18053_c0/f2p0/349	F01_cb18053_c0/f2p0/349
F02_cb6693_c0/f1p0/2490	F02_cb6693_c0/f1p0/2490	F02_cb6693_c0/f1p0/2490	F02_cb6693_c0/f1p0/2490	F02_cb6693_c0/f1p0/2490
F02_cb11041_c83243/f1p0/1698	NA	F02_cb11041_c83243/f1p0/1698	F02_cb11041_c83243/f1p0/1698	NA
F01_cb7642_c2/f1p0/3781	NA	NA	NA	F01_cb7642_c2/f1p0/3781
F01_cb9960_c2/f1p0/2073	F01_cb9960_c2/f1p0/2073	F01_cb9960_c2/f1p0/2073	NA	NA
F01_cb16907_c3/f1p0/1384	NA	F01_cb16907_c3/f1p0/1384	NA	F01_cb16907_c3/f1p0/1384
F01_cb12268_c7/f1p0/834	NA	NA	NA	F01_cb12268_c7/f1p0/834
F02_cb8532_c1/f1p0/2234	NA	NA	NA	F02_cb8532_c1/f1p0/2234
F02_cb14598_c1/f1p0/2023	NA	F02_cb14598_c1/f1p0/2023	NA	NA
F01_cb7926_c7/f1p1/1198	NA	F01_cb7926_c7/f1p1/1198	NA	F01_cb7926_c7/f1p1/1198
F02_cb11345_c8/f1p0/731	NA	F02_cb11345_c8/f1p0/731	NA	NA
F01_cb18705_c2/f1p0/1491	NA	F01_cb18705_c2/f1p0/1491	NA	F01_cb18705_c2/f1p0/1491
F01_cb2427_c3/f1p0/686	F01_cb2427_c3/f1p0/686	F01_cb2427_c3/f1p0/686	NA	F01_cb2427_c3/f1p0/686
F01_cb1166_c21/f1p1/3485	NA	NA	NA	F01_cb1166_c21/f1p1/3485
F01_cb6100_c4/f1p0/1502	NA	NA	NA	F01_cb6100_c4/f1p0/1502
F01_cb13694_c1/f1p0/2361	NA	F01_cb13694_c1/f1p0/2361	NA	NA
F01_cb16438_c15995/f1p0/1951	F01_cb16438_c15995/f1p0/1951	F01_cb16438_c15995/f1p0/1951	NA	NA
F01_cb20286_c0/f3p0/422	NA	F01_cb20286_c0/f3p0/422	NA	F01_cb20286_c0/f3p0/422
F02_cb6610_c6/f1p0/828	F02_cb6610_c6/f1p0/828	F02_cb6610_c6/f1p0/828	F02_cb6610_c6/f1p0/828	F02_cb6610_c6/f1p0/828
F01_cb15856_c12/f1p0/1474	NA	F01_cb15856_c12/f1p0/1474	NA	F01_cb15856_c12/f1p0/1474
F01_cb19496_c398/f1p0/576	F01_cb19496_c398/f1p0/576	F01_cb19496_c398/f1p0/576	NA	F01_cb19496_c398/f1p0/576
F01_cb15235_c5/f10p0/652	NA	NA	F01_cb15235_c5/f10p0/652	F01_cb15235_c5/f10p0/652
F01_cb14569_c1/f1p0/2304	NA	NA	NA	F01_cb14569_c1/f1p0/2304
F01_cb4184_c8/f1p0/2879	NA	F01_cb4184_c8/f1p0/2879	NA	F01_cb4184_c8/f1p0/2879
F01_cb12951_c28/f3p3/1486	NA	NA	NA	F01_cb12951_c28/f3p3/1486
F02_cb11041_c37778/f2p0/2945	F02_cb11041_c37778/f2p0/2945	F02_cb11041_c37778/f2p0/2945	NA	F02_cb11041_c37778/f2p0/2945
F02_cb15584_c3/f2p0/402	NA	F02_cb15584_c3/f2p0/402	NA	F02_cb15584_c3/f2p0/402
F02_cb19672_c1/f1p0/786	NA	F02_cb19672_c1/f1p0/786	NA	NA
F01_cb21509_c0/f1p0/1101	NA	F01_cb21509_c0/f1p0/1101	NA	NA
F02_cb2813_c5/f1p0/3293	NA	NA	NA	F02_cb2813_c5/f1p0/3293
F01_cb2732_c0/f3p0/2516	NA	F01_cb2732_c0/f3p0/2516	NA	NA
F02_cb5772_c2/f1p0/2649	NA	NA	NA	F02_cb5772_c2/f1p0/2649
F01_cb13652_c9/f1p0/791	NA	NA	NA	F01_cb13652_c9/f1p0/791
F02_cb16110_c4/f1p0/918	F02_cb16110_c4/f1p0/918	F02_cb16110_c4/f1p0/918	NA	NA
F01_cb8395_c7/f1p0/1489	NA	NA	NA	F01_cb8395_c7/f1p0/1489
F02_cb11041_c83611/f1p0/1304	NA	F02_cb11041_c83611/f1p0/1304	NA	NA
F01_cb3440_c1/f1p0/3187	NA	NA	NA	F01_cb3440_c1/f1p0/3187
F01_cb13690_c6/f1p0/851	NA	F01_cb13690_c6/f1p0/851	NA	NA
F02_cb8541_c2/f1p0/2233	NA	F02_cb8541_c2/f1p0/2233	NA	NA
F02_cb19537_c1/f1p0/816	NA	F02_cb19537_c1/f1p0/816	NA	NA
F01_cb18863_c2/f1p0/556	NA	F01_cb18863_c2/f1p0/556	NA	F01_cb18863_c2/f1p0/556
F01_cb18636_c1/f1p0/361	F01_cb18636_c1/f1p0/361	F01_cb18636_c1/f1p0/361	F01_cb18636_c1/f1p0/361	F01_cb18636_c1/f1p0/361
F01_cb15907_c1/f5p0/645	F01_cb15907_c1/f5p0/645	F01_cb15907_c1/f5p0/645	F01_cb15907_c1/f5p0/645	F01_cb15907_c1/f5p0/645
F01_cb3673_c0/f1p0/3124	NA	F01_cb3673_c0/f1p0/3124	F01_cb3673_c0/f1p0/3124	NA
F02_cb16481_c3/f1p0/1064	NA	NA	NA	F02_cb16481_c3/f1p0/1064
F02_cb11041_c1773/f2p0/3763	NA	F02_cb11041_c1773/f2p0/3763	F02_cb11041_c1773/f2p0/3763	NA
F01_cb12439_c1/f1p0/1700	NA	F01_cb12439_c1/f1p0/1700	NA	NA
F01_cb5755_c1/f1p0/1972	F01_cb5755_c1/f1p0/1972	F01_cb5755_c1/f1p0/1972	NA	F01_cb5755_c1/f1p0/1972
F01_cb16438_c42454/f1p0/2124	NA	F01_cb16438_c42454/f1p0/2124	F01_cb16438_c42454/f1p0/2124	NA
F01_cb6124_c3/f1p0/2647	F01_cb6124_c3/f1p0/2647	F01_cb6124_c3/f1p0/2647	NA	F01_cb6124_c3/f1p0/2647
F02_cb11368_c11/f1p0/2350	NA	NA	NA	F02_cb11368_c11/f1p0/2350
F02_cb19266_c88/f1p0/1193	F02_cb19266_c88/f1p0/1193	F02_cb19266_c88/f1p0/1193	F02_cb19266_c88/f1p0/1193	F02_cb19266_c88/f1p0/1193
F01_cb8486_c1/f1p0/2211	NA	NA	NA	F01_cb8486_c1/f1p0/2211
F02_cb11041_c3813/f1p0/2259	F02_cb11041_c3813/f1p0/2259	F02_cb11041_c3813/f1p0/2259	NA	NA
F01_cb4790_c12/f1p0/544	NA	F01_cb4790_c12/f1p0/544	NA	F01_cb4790_c12/f1p0/544
F01_cb19546_c3/f1p0/1188	NA	F01_cb19546_c3/f1p0/1188	NA	NA
F01_cb3661_c3/f1p0/1260	NA	F01_cb3661_c3/f1p0/1260	NA	F01_cb3661_c3/f1p0/1260
F01_cb8205_c0/f1p0/2321	F01_cb8205_c0/f1p0/2321	F01_cb8205_c0/f1p0/2321	F01_cb8205_c0/f1p0/2321	NA
F02_cb11041_c4976/f1p1/3096	NA	NA	NA	F02_cb11041_c4976/f1p1/3096
F02_cb4049_c15/f1p0/2988	NA	F02_cb4049_c15/f1p0/2988	NA	NA
F01_cb19777_c6/f1p0/593	F01_cb19777_c6/f1p0/593	F01_cb19777_c6/f1p0/593	F01_cb19777_c6/f1p0/593	F01_cb19777_c6/f1p0/593
F02_cb7500_c3/f1p0/622	F02_cb7500_c3/f1p0/622	F02_cb7500_c3/f1p0/622	NA	NA
F01_cb16438_c1287/f1p0/3054	NA	F01_cb16438_c1287/f1p0/3054	F01_cb16438_c1287/f1p0/3054	NA
F02_cb11041_c87729/f1p2/1725	F02_cb11041_c87729/f1p2/1725	F02_cb11041_c87729/f1p2/1725	NA	NA
F01_cb21043_c0/f2p0/640	NA	F01_cb21043_c0/f2p0/640	NA	NA
F01_cb18104_c2/f1p0/831	NA	NA	NA	F01_cb18104_c2/f1p0/831
F01_cb19297_c1/f1p0/546	F01_cb19297_c1/f1p0/546	F01_cb19297_c1/f1p0/546	F01_cb19297_c1/f1p0/546	F01_cb19297_c1/f1p0/546
F02_cb17337_c11/f6p0/453	F02_cb17337_c11/f6p0/453	NA	NA	NA
F01_cb16438_c33006/f1p0/1869	NA	NA	NA	F01_cb16438_c33006/f1p0/1869
F02_cb11919_c3/f1p0/3206	F02_cb11919_c3/f1p0/3206	F02_cb11919_c3/f1p0/3206	NA	F02_cb11919_c3/f1p0/3206
F01_cb11588_c6/f1p0/1784	NA	NA	NA	F01_cb11588_c6/f1p0/1784
F01_cb16438_c3429/f1p0/1724	NA	F01_cb16438_c3429/f1p0/1724	F01_cb16438_c3429/f1p0/1724	F01_cb16438_c3429/f1p0/1724
F01_cb1002_c7/f1p0/2069	NA	NA	NA	F01_cb1002_c7/f1p0/2069
F02_cb17379_c0/f3p0/1264	NA	NA	NA	F02_cb17379_c0/f3p0/1264
F02_cb19474_c1/f1p0/721	F02_cb19474_c1/f1p0/721	F02_cb19474_c1/f1p0/721	F02_cb19474_c1/f1p0/721	F02_cb19474_c1/f1p0/721
F01_cb16438_c40124/f1p0/2383	NA	F01_cb16438_c40124/f1p0/2383	NA	F01_cb16438_c40124/f1p0/2383
F01_cb13595_c5/f1p0/412	F01_cb13595_c5/f1p0/412	F01_cb13595_c5/f1p0/412	NA	NA
F02_cb16796_c1/f2p0/597	F02_cb16796_c1/f2p0/597	F02_cb16796_c1/f2p0/597	NA	NA
F01_cb19683_c2/f1p0/655	NA	NA	NA	F01_cb19683_c2/f1p0/655
F01_cb21976_c1/f1p0/1148	NA	NA	NA	F01_cb21976_c1/f1p0/1148
F02_cb16500_c3/f2p0/471	NA	F02_cb16500_c3/f2p0/471	NA	NA
F01_cb9172_c30/f1p1/1221	NA	NA	NA	F01_cb9172_c30/f1p1/1221
F02_cb13970_c4/f1p0/1050	NA	F02_cb13970_c4/f1p0/1050	NA	NA
F02_cb17634_c0/f2p0/434	F02_cb17634_c0/f2p0/434	F02_cb17634_c0/f2p0/434	F02_cb17634_c0/f2p0/434	F02_cb17634_c0/f2p0/434
F01_cb3101_c132/f1p0/1996	NA	F01_cb3101_c132/f1p0/1996	NA	NA
F02_cb17370_c0/f7p0/548	NA	F02_cb17370_c0/f7p0/548	NA	NA
F01_cb13044_c387/f1p0/1445	NA	NA	F01_cb13044_c387/f1p0/1445	NA
F01_cb12982_c6/f1p0/400	F01_cb12982_c6/f1p0/400	F01_cb12982_c6/f1p0/400	F01_cb12982_c6/f1p0/400	F01_cb12982_c6/f1p0/400
F02_cb1675_c9/f1p0/503	F02_cb1675_c9/f1p0/503	F02_cb1675_c9/f1p0/503	F02_cb1675_c9/f1p0/503	F02_cb1675_c9/f1p0/503
F02_cb11041_c82016/f1p0/2106	NA	F02_cb11041_c82016/f1p0/2106	NA	NA
F02_cb3793_c2/f1p0/2985	NA	NA	NA	F02_cb3793_c2/f1p0/2985
F02_cb16125_c1/f1p0/1273	F02_cb16125_c1/f1p0/1273	F02_cb16125_c1/f1p0/1273	F02_cb16125_c1/f1p0/1273	F02_cb16125_c1/f1p0/1273
F02_cb11041_c74300/f2p0/1761	NA	NA	F02_cb11041_c74300/f2p0/1761	F02_cb11041_c74300/f2p0/1761
F01_cb3101_c59/f1p0/2495	NA	F01_cb3101_c59/f1p0/2495	NA	F01_cb3101_c59/f1p0/2495
F02_cb869_c18/f1p0/1828	NA	NA	NA	F02_cb869_c18/f1p0/1828
F02_cb11840_c4/f1p0/787	NA	F02_cb11840_c4/f1p0/787	NA	F02_cb11840_c4/f1p0/787
F01_cb16510_c7/f1p0/1580	NA	F01_cb16510_c7/f1p0/1580	NA	F01_cb16510_c7/f1p0/1580
F01_cb16438_c4319/f1p0/2777	NA	F01_cb16438_c4319/f1p0/2777	F01_cb16438_c4319/f1p0/2777	F01_cb16438_c4319/f1p0/2777
F01_cb16991_c27/f1p0/878	NA	NA	NA	F01_cb16991_c27/f1p0/878
F02_cb865_c7/f1p0/3254	NA	NA	NA	F02_cb865_c7/f1p0/3254
F01_cb17567_c5/f5p0/465	F01_cb17567_c5/f5p0/465	F01_cb17567_c5/f5p0/465	F01_cb17567_c5/f5p0/465	F01_cb17567_c5/f5p0/465
F01_cb13452_c5/f1p0/978	F01_cb13452_c5/f1p0/978	NA	NA	NA
F01_cb12224_c532/f1p0/2731	NA	NA	NA	F01_cb12224_c532/f1p0/2731
F01_cb2157_c2/f1p0/3546	F01_cb2157_c2/f1p0/3546	F01_cb2157_c2/f1p0/3546	NA	F01_cb2157_c2/f1p0/3546
F02_cb15345_c6/f1p0/790	NA	F02_cb15345_c6/f1p0/790	NA	NA
F02_cb9354_c0/f2p0/2077	NA	F02_cb9354_c0/f2p0/2077	NA	NA
F02_cb148_c8/f1p0/2040	NA	NA	NA	F02_cb148_c8/f1p0/2040
F01_cb16567_c0/f1p0/758	NA	NA	NA	F01_cb16567_c0/f1p0/758
F02_cb11018_c34/f2p0/2948	NA	NA	NA	F02_cb11018_c34/f2p0/2948
F02_cb14304_c6/f1p0/1311	NA	NA	NA	F02_cb14304_c6/f1p0/1311
F01_cb16438_c3336/f1p0/2465	NA	NA	NA	F01_cb16438_c3336/f1p0/2465
F01_cb3675_c2/f1p0/2370	F01_cb3675_c2/f1p0/2370	NA	F01_cb3675_c2/f1p0/2370	F01_cb3675_c2/f1p0/2370
F01_cb7246_c2/f1p0/1763	NA	F01_cb7246_c2/f1p0/1763	NA	NA
F01_cb16438_c1455/f1p0/1890	NA	NA	NA	F01_cb16438_c1455/f1p0/1890
F02_cb14714_c1/f1p0/1239	NA	NA	NA	F02_cb14714_c1/f1p0/1239
F02_cb7254_c3/f1p0/1673	F02_cb7254_c3/f1p0/1673	F02_cb7254_c3/f1p0/1673	NA	F02_cb7254_c3/f1p0/1673
F01_cb19165_c0/f1p0/315	F01_cb19165_c0/f1p0/315	F01_cb19165_c0/f1p0/315	F01_cb19165_c0/f1p0/315	F01_cb19165_c0/f1p0/315
F01_cb2888_c4/f1p0/3152	NA	NA	NA	F01_cb2888_c4/f1p0/3152
F01_cb16438_c44544/f1p0/3037	NA	F01_cb16438_c44544/f1p0/3037	NA	NA
F01_cb8931_c0/f1p0/2216	NA	NA	NA	F01_cb8931_c0/f1p0/2216
F02_cb7925_c0/f1p0/2297	NA	F02_cb7925_c0/f1p0/2297	NA	NA
F02_cb9868_c1/f1p0/1361	NA	NA	NA	F02_cb9868_c1/f1p0/1361
F02_cb14550_c1/f1p0/2118	NA	NA	NA	F02_cb14550_c1/f1p0/2118
F01_cb7430_c18/f1p1/2184	NA	NA	NA	F01_cb7430_c18/f1p1/2184
F01_cb16438_c18684/f1p0/2672	NA	F01_cb16438_c18684/f1p0/2672	F01_cb16438_c18684/f1p0/2672	F01_cb16438_c18684/f1p0/2672
F01_cb20836_c0/f2p0/752	NA	F01_cb20836_c0/f2p0/752	NA	F01_cb20836_c0/f2p0/752
F01_cb19496_c266/f1p0/929	NA	F01_cb19496_c266/f1p0/929	NA	NA
F02_cb5282_c4/f1p0/1024	NA	F02_cb5282_c4/f1p0/1024	NA	F02_cb5282_c4/f1p0/1024
F02_cb7124_c9/f1p0/1147	NA	F02_cb7124_c9/f1p0/1147	NA	F02_cb7124_c9/f1p0/1147
F02_cb14670_c2/f1p0/571	NA	F02_cb14670_c2/f1p0/571	NA	F02_cb14670_c2/f1p0/571
F01_cb13394_c0/f1p0/1098	F01_cb13394_c0/f1p0/1098	F01_cb13394_c0/f1p0/1098	NA	F01_cb13394_c0/f1p0/1098
F02_cb11521_c4/f1p0/1526	NA	F02_cb11521_c4/f1p0/1526	NA	F02_cb11521_c4/f1p0/1526
F01_cb214_c6/f1p0/2848	NA	NA	NA	F01_cb214_c6/f1p0/2848
F01_cb16438_c18956/f1p0/1947	NA	F01_cb16438_c18956/f1p0/1947	NA	NA
F01_cb15016_c0/f4p0/713	NA	F01_cb15016_c0/f4p0/713	NA	F01_cb15016_c0/f4p0/713
F01_cb16438_c37981/f1p0/1774	F01_cb16438_c37981/f1p0/1774	F01_cb16438_c37981/f1p0/1774	NA	F01_cb16438_c37981/f1p0/1774
F01_cb16438_c2868/f1p0/2308	NA	F01_cb16438_c2868/f1p0/2308	NA	NA
F01_cb15535_c3/f1p0/1262	NA	NA	F01_cb15535_c3/f1p0/1262	F01_cb15535_c3/f1p0/1262
F02_cb8056_c0/f1p0/2282	NA	F02_cb8056_c0/f1p0/2282	F02_cb8056_c0/f1p0/2282	F02_cb8056_c0/f1p0/2282
F01_cb271_c3/f1p1/3203	NA	NA	NA	F01_cb271_c3/f1p1/3203
F01_cb19682_c544/f1p0/522	F01_cb19682_c544/f1p0/522	F01_cb19682_c544/f1p0/522	NA	F01_cb19682_c544/f1p0/522
F02_cb11041_c87775/f1p0/1742	F02_cb11041_c87775/f1p0/1742	F02_cb11041_c87775/f1p0/1742	F02_cb11041_c87775/f1p0/1742	NA
F02_cb13941_c8/f1p0/848	NA	NA	F02_cb13941_c8/f1p0/848	F02_cb13941_c8/f1p0/848
F01_cb16869_c3/f1p0/912	NA	F01_cb16869_c3/f1p0/912	F01_cb16869_c3/f1p0/912	F01_cb16869_c3/f1p0/912
F02_cb6188_c8/f1p0/1335	F02_cb6188_c8/f1p0/1335	F02_cb6188_c8/f1p0/1335	F02_cb6188_c8/f1p0/1335	F02_cb6188_c8/f1p0/1335
F01_cb19452_c0/f1p0/797	NA	F01_cb19452_c0/f1p0/797	F01_cb19452_c0/f1p0/797	F01_cb19452_c0/f1p0/797
F02_cb11041_c1766/f1p0/2619	NA	NA	NA	F02_cb11041_c1766/f1p0/2619
F01_cb16438_c23101/f3p0/2153	NA	F01_cb16438_c23101/f3p0/2153	F01_cb16438_c23101/f3p0/2153	F01_cb16438_c23101/f3p0/2153
F01_cb17872_c6/f1p0/978	NA	F01_cb17872_c6/f1p0/978	NA	NA
F02_cb15290_c493/f1p2/592	NA	NA	F02_cb15290_c493/f1p2/592	NA
F01_cb18305_c4/f1p0/765	F01_cb18305_c4/f1p0/765	NA	NA	NA
F01_cb4368_c9/f1p0/1825	NA	F01_cb4368_c9/f1p0/1825	NA	NA
F02_cb14696_c1/f1p0/2685	NA	NA	F02_cb14696_c1/f1p0/2685	F02_cb14696_c1/f1p0/2685
F02_cb2445_c1/f1p0/3651	NA	F02_cb2445_c1/f1p0/3651	NA	NA
F02_cb11041_c89257/f1p0/2066	NA	F02_cb11041_c89257/f1p0/2066	NA	NA
F01_cb15810_c8/f1p0/656	NA	NA	F01_cb15810_c8/f1p0/656	F01_cb15810_c8/f1p0/656
F02_cb11041_c57666/f1p0/1743	NA	F02_cb11041_c57666/f1p0/1743	F02_cb11041_c57666/f1p0/1743	F02_cb11041_c57666/f1p0/1743
F01_cb21018_c31/f1p0/660	F01_cb21018_c31/f1p0/660	F01_cb21018_c31/f1p0/660	NA	F01_cb21018_c31/f1p0/660
F01_cb7185_c3/f1p0/1681	NA	F01_cb7185_c3/f1p0/1681	F01_cb7185_c3/f1p0/1681	F01_cb7185_c3/f1p0/1681
F01_cb15331_c2/f2p0/570	NA	F01_cb15331_c2/f2p0/570	NA	NA
F02_cb7710_c1/f1p0/1856	NA	NA	NA	F02_cb7710_c1/f1p0/1856
F01_cb12150_c0/f2p0/1693	NA	F01_cb12150_c0/f2p0/1693	F01_cb12150_c0/f2p0/1693	F01_cb12150_c0/f2p0/1693
F01_cb7678_c16/f1p0/1901	NA	F01_cb7678_c16/f1p0/1901	NA	NA
F01_cb6597_c3/f1p0/2571	NA	NA	NA	F01_cb6597_c3/f1p0/2571
F02_cb19545_c1/f1p0/400	F02_cb19545_c1/f1p0/400	NA	NA	F02_cb19545_c1/f1p0/400
F02_cb16008_c0/f1p0/638	NA	NA	F02_cb16008_c0/f1p0/638	F02_cb16008_c0/f1p0/638
F02_cb5247_c2/f1p0/2287	NA	NA	NA	F02_cb5247_c2/f1p0/2287
F01_cb21123_c1/f2p0/518	NA	F01_cb21123_c1/f2p0/518	NA	NA
F01_cb2344_c8/f1p0/3359	NA	NA	NA	F01_cb2344_c8/f1p0/3359
F01_cb15658_c2/f1p2/902	NA	F01_cb15658_c2/f1p2/902	NA	NA
F01_cb4295_c1/f1p0/2992	NA	F01_cb4295_c1/f1p0/2992	NA	NA
F01_cb7759_c4/f1p0/1862	NA	NA	NA	F01_cb7759_c4/f1p0/1862
F01_cb8077_c5/f1p0/2730	NA	F01_cb8077_c5/f1p0/2730	NA	NA
F02_cb1320_c4/f1p0/9175	F02_cb1320_c4/f1p0/9175	NA	NA	F02_cb1320_c4/f1p0/9175
F01_cb7631_c6/f1p0/1770	NA	NA	NA	F01_cb7631_c6/f1p0/1770
F02_cb17888_c1/f2p0/875	NA	F02_cb17888_c1/f2p0/875	NA	F02_cb17888_c1/f2p0/875
F01_cb10764_c2/f1p0/3295	NA	NA	NA	F01_cb10764_c2/f1p0/3295
F02_cb3259_c3/f1p0/1805	NA	F02_cb3259_c3/f1p0/1805	F02_cb3259_c3/f1p0/1805	NA
F01_cb16438_c34938/f1p1/1748	NA	NA	NA	F01_cb16438_c34938/f1p1/1748
F01_cb16438_c44909/f1p1/2001	NA	NA	NA	F01_cb16438_c44909/f1p1/2001
F02_cb19576_c0/f1p0/1096	NA	F02_cb19576_c0/f1p0/1096	NA	F02_cb19576_c0/f1p0/1096
F02_cb14212_c3/f1p0/2015	NA	F02_cb14212_c3/f1p0/2015	NA	F02_cb14212_c3/f1p0/2015
F01_cb17373_c19/f1p0/762	NA	F01_cb17373_c19/f1p0/762	F01_cb17373_c19/f1p0/762	F01_cb17373_c19/f1p0/762
F02_cb11041_c5079/f2p2/3501	NA	NA	NA	F02_cb11041_c5079/f2p2/3501
F02_cb4350_c2/f1p0/1858	NA	NA	F02_cb4350_c2/f1p0/1858	F02_cb4350_c2/f1p0/1858
F02_cb1687_c11/f1p0/3113	NA	NA	NA	F02_cb1687_c11/f1p0/3113
F02_cb15575_c3/f1p0/323	F02_cb15575_c3/f1p0/323	F02_cb15575_c3/f1p0/323	NA	NA
F02_cb15290_c761/f1p0/505	F02_cb15290_c761/f1p0/505	F02_cb15290_c761/f1p0/505	F02_cb15290_c761/f1p0/505	F02_cb15290_c761/f1p0/505
F02_cb1272_c5/f1p0/2591	NA	F02_cb1272_c5/f1p0/2591	NA	NA
F01_cb21688_c105/f1p0/1049	F01_cb21688_c105/f1p0/1049	F01_cb21688_c105/f1p0/1049	F01_cb21688_c105/f1p0/1049	F01_cb21688_c105/f1p0/1049
F01_cb10489_c14/f1p0/1846	NA	NA	NA	F01_cb10489_c14/f1p0/1846
F01_cb11380_c1/f1p0/1815	NA	NA	NA	F01_cb11380_c1/f1p0/1815
F01_cb13154_c1/f1p0/3361	F01_cb13154_c1/f1p0/3361	F01_cb13154_c1/f1p0/3361	F01_cb13154_c1/f1p0/3361	F01_cb13154_c1/f1p0/3361
F01_cb20951_c5/f1p0/601	NA	NA	F01_cb20951_c5/f1p0/601	F01_cb20951_c5/f1p0/601
F02_cb15661_c2/f7p1/798	NA	NA	NA	F02_cb15661_c2/f7p1/798
F02_cb14763_c0/f1p0/463	F02_cb14763_c0/f1p0/463	F02_cb14763_c0/f1p0/463	NA	NA
F01_cb11551_c5/f1p0/1448	NA	NA	F01_cb11551_c5/f1p0/1448	F01_cb11551_c5/f1p0/1448
F02_cb969_c9/f1p2/3597	NA	F02_cb969_c9/f1p2/3597	NA	NA
F01_cb19509_c3/f7p0/378	F01_cb19509_c3/f7p0/378	F01_cb19509_c3/f7p0/378	F01_cb19509_c3/f7p0/378	NA
F01_cb13561_c0/f3p0/1193	NA	NA	NA	F01_cb13561_c0/f3p0/1193
F01_cb8335_c18/f1p0/1120	NA	NA	NA	F01_cb8335_c18/f1p0/1120
F02_cb2897_c8/f1p0/1025	NA	NA	NA	F02_cb2897_c8/f1p0/1025
F01_cb6572_c8/f1p0/2480	NA	F01_cb6572_c8/f1p0/2480	NA	NA
F01_cb1578_c5/f1p0/2096	NA	F01_cb1578_c5/f1p0/2096	NA	NA
F01_cb7857_c0/f1p0/2368	NA	NA	NA	F01_cb7857_c0/f1p0/2368
F01_cb13505_c4/f1p1/1645	F01_cb13505_c4/f1p1/1645	F01_cb13505_c4/f1p1/1645	NA	NA
F02_cb2925_c17/f1p0/2630	NA	NA	NA	F02_cb2925_c17/f1p0/2630
F02_cb17855_c2/f1p0/531	F02_cb17855_c2/f1p0/531	F02_cb17855_c2/f1p0/531	NA	NA
F02_cb911_c304/f1p2/1168	NA	NA	F02_cb911_c304/f1p2/1168	NA
F01_cb21920_c1/f1p0/1485	NA	NA	NA	F01_cb21920_c1/f1p0/1485
F01_cb16438_c42008/f1p0/1736	NA	F01_cb16438_c42008/f1p0/1736	F01_cb16438_c42008/f1p0/1736	F01_cb16438_c42008/f1p0/1736
F02_cb326_c4/f1p0/4594	NA	NA	NA	F02_cb326_c4/f1p0/4594
F02_cb17747_c0/f3p0/526	NA	F02_cb17747_c0/f3p0/526	NA	NA
F02_cb4365_c3/f1p0/2905	NA	NA	NA	F02_cb4365_c3/f1p0/2905
F01_cb14730_c0/f1p0/1669	F01_cb14730_c0/f1p0/1669	F01_cb14730_c0/f1p0/1669	NA	F01_cb14730_c0/f1p0/1669
F01_cb7528_c1/f1p1/861	NA	F01_cb7528_c1/f1p1/861	NA	NA
F02_cb5853_c3/f1p0/2427	F02_cb5853_c3/f1p0/2427	F02_cb5853_c3/f1p0/2427	F02_cb5853_c3/f1p0/2427	F02_cb5853_c3/f1p0/2427
F01_cb19808_c67/f1p0/1585	NA	F01_cb19808_c67/f1p0/1585	NA	F01_cb19808_c67/f1p0/1585
F01_cb16438_c22293/f1p3/4128	NA	NA	NA	F01_cb16438_c22293/f1p3/4128
F02_cb16838_c3/f1p0/443	F02_cb16838_c3/f1p0/443	F02_cb16838_c3/f1p0/443	NA	F02_cb16838_c3/f1p0/443
F01_cb9199_c2/f1p0/2180	NA	F01_cb9199_c2/f1p0/2180	NA	NA
F02_cb9330_c10/f2p0/1498	NA	F02_cb9330_c10/f2p0/1498	F02_cb9330_c10/f2p0/1498	F02_cb9330_c10/f2p0/1498
F01_cb15226_c1/f1p0/1345	NA	F01_cb15226_c1/f1p0/1345	F01_cb15226_c1/f1p0/1345	F01_cb15226_c1/f1p0/1345
F01_cb2927_c2/f1p0/2718	NA	F01_cb2927_c2/f1p0/2718	NA	F01_cb2927_c2/f1p0/2718
F02_cb15910_c2/f1p0/973	F02_cb15910_c2/f1p0/973	F02_cb15910_c2/f1p0/973	NA	NA
F02_cb4020_c5/f2p0/621	NA	F02_cb4020_c5/f2p0/621	NA	NA
F01_cb7599_c19/f1p0/2124	NA	NA	NA	F01_cb7599_c19/f1p0/2124
F02_cb11041_c4732/f1p0/1448	NA	F02_cb11041_c4732/f1p0/1448	F02_cb11041_c4732/f1p0/1448	F02_cb11041_c4732/f1p0/1448
F01_cb16438_c40189/f1p0/2753	NA	F01_cb16438_c40189/f1p0/2753	NA	NA
F01_cb16438_c24533/f1p0/4328	NA	F01_cb16438_c24533/f1p0/4328	NA	F01_cb16438_c24533/f1p0/4328
F01_cb13599_c0/f1p0/825	F01_cb13599_c0/f1p0/825	F01_cb13599_c0/f1p0/825	F01_cb13599_c0/f1p0/825	F01_cb13599_c0/f1p0/825
F02_cb15073_c473/f1p0/918	NA	NA	NA	F02_cb15073_c473/f1p0/918
F01_cb14393_c1/f1p0/1316	NA	F01_cb14393_c1/f1p0/1316	NA	NA
F02_cb8543_c1/f1p0/2212	NA	F02_cb8543_c1/f1p0/2212	NA	NA
F01_cb5187_c11/f1p0/2623	NA	F01_cb5187_c11/f1p0/2623	NA	NA
F01_cb14426_c0/f3p1/1495	NA	NA	NA	F01_cb14426_c0/f3p1/1495
F01_cb4313_c143/f1p0/1691	NA	F01_cb4313_c143/f1p0/1691	NA	F01_cb4313_c143/f1p0/1691
F02_cb3463_c11/f1p0/2837	NA	NA	NA	F02_cb3463_c11/f1p0/2837
F01_cb10958_c4/f1p0/1211	NA	NA	NA	F01_cb10958_c4/f1p0/1211
F01_cb19056_c1/f1p0/758	NA	NA	NA	F01_cb19056_c1/f1p0/758
F01_cb13526_c3/f1p0/2547	NA	F01_cb13526_c3/f1p0/2547	NA	F01_cb13526_c3/f1p0/2547
F02_cb7033_c15/f1p0/934	F02_cb7033_c15/f1p0/934	F02_cb7033_c15/f1p0/934	F02_cb7033_c15/f1p0/934	F02_cb7033_c15/f1p0/934
F01_cb11764_c2/f1p0/1336	NA	F01_cb11764_c2/f1p0/1336	F01_cb11764_c2/f1p0/1336	F01_cb11764_c2/f1p0/1336
F01_cb2300_c6/f1p0/2883	NA	NA	NA	F01_cb2300_c6/f1p0/2883
F02_cb2707_c26/f1p0/4071	NA	F02_cb2707_c26/f1p0/4071	F02_cb2707_c26/f1p0/4071	NA
F02_cb12812_c1/f1p0/2192	NA	F02_cb12812_c1/f1p0/2192	F02_cb12812_c1/f1p0/2192	F02_cb12812_c1/f1p0/2192
F01_cb19567_c0/f1p0/330	F01_cb19567_c0/f1p0/330	F01_cb19567_c0/f1p0/330	F01_cb19567_c0/f1p0/330	F01_cb19567_c0/f1p0/330
F01_cb16438_c37644/f1p0/2119	NA	F01_cb16438_c37644/f1p0/2119	NA	NA
F02_cb15557_c3/f1p0/322	F02_cb15557_c3/f1p0/322	F02_cb15557_c3/f1p0/322	F02_cb15557_c3/f1p0/322	F02_cb15557_c3/f1p0/322
F02_cb1094_c6/f1p0/3626	NA	NA	NA	F02_cb1094_c6/f1p0/3626
F01_cb5221_c8/f1p0/841	NA	NA	NA	F01_cb5221_c8/f1p0/841
F02_cb6819_c12/f1p0/2241	NA	F02_cb6819_c12/f1p0/2241	NA	NA
F02_cb16713_c315/f1p0/1026	NA	NA	NA	F02_cb16713_c315/f1p0/1026
F01_cb16438_c39056/f1p0/1752	NA	NA	NA	F01_cb16438_c39056/f1p0/1752
F02_cb8515_c6/f1p0/1905	NA	F02_cb8515_c6/f1p0/1905	NA	F02_cb8515_c6/f1p0/1905
F02_cb8188_c18/f1p0/1870	NA	F02_cb8188_c18/f1p0/1870	NA	NA
F01_cb18815_c0/f2p0/1069	NA	NA	NA	F01_cb18815_c0/f2p0/1069
F02_cb8280_c7/f1p0/835	NA	F02_cb8280_c7/f1p0/835	NA	NA
F01_cb12257_c1/f1p0/2049	F01_cb12257_c1/f1p0/2049	F01_cb12257_c1/f1p0/2049	F01_cb12257_c1/f1p0/2049	NA
F01_cb16438_c44727/f1p0/2088	NA	F01_cb16438_c44727/f1p0/2088	NA	NA
F02_cb10452_c3/f1p0/445	F02_cb10452_c3/f1p0/445	F02_cb10452_c3/f1p0/445	F02_cb10452_c3/f1p0/445	F02_cb10452_c3/f1p0/445
F02_cb16713_c272/f1p0/437	F02_cb16713_c272/f1p0/437	F02_cb16713_c272/f1p0/437	F02_cb16713_c272/f1p0/437	F02_cb16713_c272/f1p0/437
F02_cb8340_c0/f1p0/2237	NA	F02_cb8340_c0/f1p0/2237	NA	NA
F02_cb14943_c1/f1p0/1792	NA	F02_cb14943_c1/f1p0/1792	NA	F02_cb14943_c1/f1p0/1792
F02_cb907_c18/f1p0/2216	NA	NA	NA	F02_cb907_c18/f1p0/2216
F02_cb16833_c2/f1p0/611	NA	F02_cb16833_c2/f1p0/611	NA	F02_cb16833_c2/f1p0/611
F01_cb18025_c0/f2p1/656	NA	F01_cb18025_c0/f2p1/656	F01_cb18025_c0/f2p1/656	F01_cb18025_c0/f2p1/656
F02_cb6729_c0/f4p0/2409	NA	NA	NA	F02_cb6729_c0/f4p0/2409
F01_cb6036_c3/f1p0/2876	NA	NA	NA	F01_cb6036_c3/f1p0/2876
F01_cb21688_c205/f2p0/456	F01_cb21688_c205/f2p0/456	F01_cb21688_c205/f2p0/456	F01_cb21688_c205/f2p0/456	F01_cb21688_c205/f2p0/456
F02_cb11041_c3111/f1p0/1863	NA	NA	F02_cb11041_c3111/f1p0/1863	NA
F02_cb11041_c84647/f1p0/1336	NA	F02_cb11041_c84647/f1p0/1336	NA	NA
F01_cb17470_c2/f2p0/481	NA	F01_cb17470_c2/f2p0/481	NA	NA
F01_cb1406_c5/f1p0/2342	NA	NA	NA	F01_cb1406_c5/f1p0/2342
F01_cb16438_c17899/f1p0/4271	NA	NA	NA	F01_cb16438_c17899/f1p0/4271
F01_cb21102_c1/f1p0/987	NA	F01_cb21102_c1/f1p0/987	NA	NA
F02_cb15439_c7/f1p0/382	F02_cb15439_c7/f1p0/382	F02_cb15439_c7/f1p0/382	F02_cb15439_c7/f1p0/382	F02_cb15439_c7/f1p0/382
F02_cb16713_c302/f1p0/559	F02_cb16713_c302/f1p0/559	F02_cb16713_c302/f1p0/559	F02_cb16713_c302/f1p0/559	F02_cb16713_c302/f1p0/559
F02_cb2037_c11/f1p1/2267	NA	NA	NA	F02_cb2037_c11/f1p1/2267
F02_cb11041_c42969/f1p0/2376	NA	NA	NA	F02_cb11041_c42969/f1p0/2376
F02_cb18986_c0/f2p0/956	NA	NA	NA	F02_cb18986_c0/f2p0/956
F01_cb4456_c1/f1p0/1803	NA	NA	NA	F01_cb4456_c1/f1p0/1803
F02_cb8500_c3/f1p0/1958	NA	F02_cb8500_c3/f1p0/1958	NA	NA
F01_cb13_c42/f1p0/1453	NA	F01_cb13_c42/f1p0/1453	NA	NA
F01_cb110_c8/f1p0/1210	NA	F01_cb110_c8/f1p0/1210	NA	F01_cb110_c8/f1p0/1210
F01_cb20793_c0/f1p0/326	NA	F01_cb20793_c0/f1p0/326	NA	NA
F02_cb5926_c0/f1p0/2613	F02_cb5926_c0/f1p0/2613	F02_cb5926_c0/f1p0/2613	F02_cb5926_c0/f1p0/2613	F02_cb5926_c0/f1p0/2613
F01_cb13901_c5/f2p0/579	NA	F01_cb13901_c5/f2p0/579	F01_cb13901_c5/f2p0/579	NA
F01_cb14908_c60/f1p0/462	F01_cb14908_c60/f1p0/462	F01_cb14908_c60/f1p0/462	F01_cb14908_c60/f1p0/462	F01_cb14908_c60/f1p0/462
F01_cb12820_c10/f1p0/1419	NA	NA	NA	F01_cb12820_c10/f1p0/1419
F01_cb21212_c10/f1p0/872	NA	NA	F01_cb21212_c10/f1p0/872	F01_cb21212_c10/f1p0/872
F01_cb13101_c5/f1p0/576	F01_cb13101_c5/f1p0/576	F01_cb13101_c5/f1p0/576	NA	NA
F02_cb2964_c11/f1p0/2225	NA	F02_cb2964_c11/f1p0/2225	NA	NA
F01_cb16438_c46148/f1p0/4162	NA	F01_cb16438_c46148/f1p0/4162	NA	NA
F02_cb11138_c4/f1p0/516	F02_cb11138_c4/f1p0/516	NA	F02_cb11138_c4/f1p0/516	NA
F02_cb5791_c7/f1p0/2611	NA	F02_cb5791_c7/f1p0/2611	NA	NA
F02_cb9501_c15/f1p0/587	NA	F02_cb9501_c15/f1p0/587	NA	NA
F01_cb14959_c31/f1p0/397	F01_cb14959_c31/f1p0/397	F01_cb14959_c31/f1p0/397	NA	NA
F01_cb10143_c19/f1p0/1970	NA	F01_cb10143_c19/f1p0/1970	NA	NA
F01_cb12408_c4/f1p1/1725	NA	NA	NA	F01_cb12408_c4/f1p1/1725
F02_cb15311_c5/f13p2/896	NA	F02_cb15311_c5/f13p2/896	NA	NA
F02_cb4821_c10/f1p0/2820	F02_cb4821_c10/f1p0/2820	F02_cb4821_c10/f1p0/2820	NA	NA
F02_cb15462_c19/f1p0/354	F02_cb15462_c19/f1p0/354	NA	F02_cb15462_c19/f1p0/354	NA
F01_cb18977_c2/f1p0/332	F01_cb18977_c2/f1p0/332	F01_cb18977_c2/f1p0/332	F01_cb18977_c2/f1p0/332	F01_cb18977_c2/f1p0/332
F01_cb15028_c1/f1p0/1210	NA	F01_cb15028_c1/f1p0/1210	NA	NA
F01_cb7713_c7/f1p0/2392	NA	F01_cb7713_c7/f1p0/2392	NA	NA
F01_cb16438_c13590/f1p0/2576	NA	F01_cb16438_c13590/f1p0/2576	NA	F01_cb16438_c13590/f1p0/2576
F01_cb1769_c5/f1p1/1926	NA	F01_cb1769_c5/f1p1/1926	F01_cb1769_c5/f1p1/1926	F01_cb1769_c5/f1p1/1926
F01_cb17934_c2/f1p0/676	NA	NA	F01_cb17934_c2/f1p0/676	NA
F02_cb17885_c1/f1p0/771	NA	F02_cb17885_c1/f1p0/771	F02_cb17885_c1/f1p0/771	F02_cb17885_c1/f1p0/771
F02_cb13761_c5/f1p0/486	NA	F02_cb13761_c5/f1p0/486	NA	NA
F01_cb6904_c35/f1p0/1336	NA	F01_cb6904_c35/f1p0/1336	F01_cb6904_c35/f1p0/1336	F01_cb6904_c35/f1p0/1336
F01_cb16293_c12/f1p0/394	F01_cb16293_c12/f1p0/394	F01_cb16293_c12/f1p0/394	F01_cb16293_c12/f1p0/394	F01_cb16293_c12/f1p0/394
F01_cb20101_c3/f1p0/571	NA	F01_cb20101_c3/f1p0/571	NA	NA
F01_cb13298_c17/f1p0/1330	NA	F01_cb13298_c17/f1p0/1330	NA	NA
F02_cb3145_c5/f1p0/2762	NA	F02_cb3145_c5/f1p0/2762	NA	NA
F01_cb9969_c11/f1p0/1296	NA	F01_cb9969_c11/f1p0/1296	F01_cb9969_c11/f1p0/1296	NA
F02_cb5754_c30/f1p0/1308	F02_cb5754_c30/f1p0/1308	F02_cb5754_c30/f1p0/1308	NA	NA
F02_cb7138_c2/f1p0/2424	NA	F02_cb7138_c2/f1p0/2424	NA	NA
F01_cb22373_c0/f1p0/8941	F01_cb22373_c0/f1p0/8941	F01_cb22373_c0/f1p0/8941	F01_cb22373_c0/f1p0/8941	F01_cb22373_c0/f1p0/8941
F02_cb10971_c0/f3p0/1762	NA	NA	NA	F02_cb10971_c0/f3p0/1762
F01_cb16438_c39975/f2p0/2913	NA	NA	NA	F01_cb16438_c39975/f2p0/2913
F01_cb16438_c23599/f1p0/3798	NA	NA	NA	F01_cb16438_c23599/f1p0/3798
F01_cb9042_c8/f1p0/2076	NA	NA	NA	F01_cb9042_c8/f1p0/2076
F01_cb12274_c118/f1p0/1942	NA	F01_cb12274_c118/f1p0/1942	NA	F01_cb12274_c118/f1p0/1942
F02_cb11041_c56958/f1p1/1903	NA	NA	NA	F02_cb11041_c56958/f1p1/1903
F01_cb3924_c0/f1p0/3071	NA	NA	NA	F01_cb3924_c0/f1p0/3071
F01_cb6144_c14/f1p0/636	F01_cb6144_c14/f1p0/636	F01_cb6144_c14/f1p0/636	NA	F01_cb6144_c14/f1p0/636
F02_cb15089_c1/f1p0/927	NA	F02_cb15089_c1/f1p0/927	NA	NA
F02_cb10251_c1/f1p0/3053	F02_cb10251_c1/f1p0/3053	F02_cb10251_c1/f1p0/3053	F02_cb10251_c1/f1p0/3053	F02_cb10251_c1/f1p0/3053
F01_cb16589_c0/f2p0/1316	NA	NA	NA	F01_cb16589_c0/f2p0/1316
F02_cb9681_c28/f1p0/1433	F02_cb9681_c28/f1p0/1433	F02_cb9681_c28/f1p0/1433	F02_cb9681_c28/f1p0/1433	F02_cb9681_c28/f1p0/1433
F01_cb16438_c34130/f1p0/3274	NA	NA	NA	F01_cb16438_c34130/f1p0/3274
F01_cb282_c26/f1p0/2677	NA	NA	NA	F01_cb282_c26/f1p0/2677
F02_cb11041_c45287/f1p0/2894	NA	F02_cb11041_c45287/f1p0/2894	NA	F02_cb11041_c45287/f1p0/2894
F02_cb19266_c67/f1p1/876	NA	NA	NA	F02_cb19266_c67/f1p1/876
F02_cb19494_c1/f1p0/798	NA	F02_cb19494_c1/f1p0/798	F02_cb19494_c1/f1p0/798	F02_cb19494_c1/f1p0/798
F02_cb7434_c2/f1p0/2262	NA	NA	NA	F02_cb7434_c2/f1p0/2262
F01_cb7120_c5/f1p0/2205	NA	NA	NA	F01_cb7120_c5/f1p0/2205
F01_cb13740_c4/f1p0/822	NA	F01_cb13740_c4/f1p0/822	NA	F01_cb13740_c4/f1p0/822
F01_cb3797_c1/f1p0/3096	NA	NA	NA	F01_cb3797_c1/f1p0/3096
F02_cb376_c4/f1p0/1236	F02_cb376_c4/f1p0/1236	F02_cb376_c4/f1p0/1236	F02_cb376_c4/f1p0/1236	F02_cb376_c4/f1p0/1236
F01_cb17465_c1/f1p0/686	NA	F01_cb17465_c1/f1p0/686	NA	NA
F01_cb7563_c13/f1p0/2304	NA	F01_cb7563_c13/f1p0/2304	NA	NA
F02_cb11041_c4566/f1p0/3767	NA	NA	F02_cb11041_c4566/f1p0/3767	F02_cb11041_c4566/f1p0/3767
F01_cb16438_c38702/f1p1/1881	NA	F01_cb16438_c38702/f1p1/1881	NA	NA
F01_cb19355_c1/f1p0/640	NA	NA	F01_cb19355_c1/f1p0/640	F01_cb19355_c1/f1p0/640
F01_cb21054_c3/f1p0/1482	NA	F01_cb21054_c3/f1p0/1482	NA	NA
F01_cb9331_c3/f1p0/957	NA	F01_cb9331_c3/f1p0/957	F01_cb9331_c3/f1p0/957	NA
F01_cb5414_c0/f1p0/2775	NA	F01_cb5414_c0/f1p0/2775	NA	NA
F01_cb14190_c4/f1p0/948	NA	NA	NA	F01_cb14190_c4/f1p0/948
F02_cb977_c21/f1p2/4028	NA	NA	NA	F02_cb977_c21/f1p2/4028
F02_cb14438_c1/f1p0/1464	NA	F02_cb14438_c1/f1p0/1464	NA	NA
F01_cb7170_c9/f1p0/894	NA	F01_cb7170_c9/f1p0/894	NA	NA
F01_cb7612_c2/f1p0/1561	NA	NA	NA	F01_cb7612_c2/f1p0/1561
F02_cb6084_c9/f1p0/376	F02_cb6084_c9/f1p0/376	F02_cb6084_c9/f1p0/376	F02_cb6084_c9/f1p0/376	F02_cb6084_c9/f1p0/376
F02_cb1032_c9/f1p0/3186	NA	NA	NA	F02_cb1032_c9/f1p0/3186
F01_cb8687_c2/f1p0/2251	F01_cb8687_c2/f1p0/2251	F01_cb8687_c2/f1p0/2251	F01_cb8687_c2/f1p0/2251	NA
F02_cb11041_c45286/f1p0/1467	NA	NA	NA	F02_cb11041_c45286/f1p0/1467
F01_cb19160_c0/f7p1/569	F01_cb19160_c0/f7p1/569	F01_cb19160_c0/f7p1/569	F01_cb19160_c0/f7p1/569	F01_cb19160_c0/f7p1/569
F02_cb15290_c313/f1p0/452	F02_cb15290_c313/f1p0/452	F02_cb15290_c313/f1p0/452	F02_cb15290_c313/f1p0/452	F02_cb15290_c313/f1p0/452
F02_cb16300_c1/f1p0/1038	NA	F02_cb16300_c1/f1p0/1038	F02_cb16300_c1/f1p0/1038	F02_cb16300_c1/f1p0/1038
F01_cb21241_c1/f1p0/456	NA	F01_cb21241_c1/f1p0/456	NA	NA
F01_cb14573_c3/f1p0/587	NA	F01_cb14573_c3/f1p0/587	NA	NA
F02_cb17134_c2/f1p0/851	NA	F02_cb17134_c2/f1p0/851	NA	NA
F01_cb16393_c1/f2p0/1351	NA	F01_cb16393_c1/f2p0/1351	NA	NA
F01_cb19893_c0/f3p0/1549	NA	NA	NA	F01_cb19893_c0/f3p0/1549
F01_cb5231_c11/f1p0/3359	NA	F01_cb5231_c11/f1p0/3359	NA	F01_cb5231_c11/f1p0/3359
F01_cb1033_c5/f1p0/1829	NA	NA	NA	F01_cb1033_c5/f1p0/1829
F01_cb3705_c5/f1p0/4674	NA	NA	NA	F01_cb3705_c5/f1p0/4674
F01_cb16438_c36166/f1p0/3918	F01_cb16438_c36166/f1p0/3918	F01_cb16438_c36166/f1p0/3918	F01_cb16438_c36166/f1p0/3918	NA
F01_cb10524_c11/f1p0/3210	F01_cb10524_c11/f1p0/3210	F01_cb10524_c11/f1p0/3210	NA	F01_cb10524_c11/f1p0/3210
F02_cb16630_c0/f1p0/539	NA	F02_cb16630_c0/f1p0/539	F02_cb16630_c0/f1p0/539	F02_cb16630_c0/f1p0/539
F01_cb12224_c520/f1p0/2361	NA	F01_cb12224_c520/f1p0/2361	NA	NA
F01_cb7167_c0/f1p0/2452	F01_cb7167_c0/f1p0/2452	F01_cb7167_c0/f1p0/2452	F01_cb7167_c0/f1p0/2452	F01_cb7167_c0/f1p0/2452
F01_cb18439_c1/f1p0/870	NA	NA	NA	F01_cb18439_c1/f1p0/870
F01_cb999_c4/f1p0/3292	NA	NA	NA	F01_cb999_c4/f1p0/3292
F01_cb16438_c18444/f1p0/1781	NA	F01_cb16438_c18444/f1p0/1781	F01_cb16438_c18444/f1p0/1781	F01_cb16438_c18444/f1p0/1781
F02_cb13669_c24/f1p0/1749	NA	F02_cb13669_c24/f1p0/1749	NA	NA
F02_cb3901_c3/f1p0/1367	F02_cb3901_c3/f1p0/1367	F02_cb3901_c3/f1p0/1367	F02_cb3901_c3/f1p0/1367	F02_cb3901_c3/f1p0/1367
F02_cb10096_c0/f1p0/1996	NA	F02_cb10096_c0/f1p0/1996	NA	NA
F01_cb11019_c0/f1p0/1926	NA	NA	NA	F01_cb11019_c0/f1p0/1926
F01_cb11020_c15/f1p0/1812	NA	F01_cb11020_c15/f1p0/1812	NA	NA
F01_cb16438_c1904/f1p0/2698	F01_cb16438_c1904/f1p0/2698	F01_cb16438_c1904/f1p0/2698	F01_cb16438_c1904/f1p0/2698	F01_cb16438_c1904/f1p0/2698
F01_cb18118_c0/f1p0/1181	NA	NA	F01_cb18118_c0/f1p0/1181	NA
F01_cb6647_c37/f1p0/2210	NA	F01_cb6647_c37/f1p0/2210	NA	F01_cb6647_c37/f1p0/2210
F01_cb15881_c26/f1p0/571	F01_cb15881_c26/f1p0/571	F01_cb15881_c26/f1p0/571	NA	NA
F01_cb20706_c0/f7p0/543	F01_cb20706_c0/f7p0/543	F01_cb20706_c0/f7p0/543	NA	F01_cb20706_c0/f7p0/543
F01_cb16438_c11316/f2p0/1996	NA	F01_cb16438_c11316/f2p0/1996	F01_cb16438_c11316/f2p0/1996	NA
F02_cb3196_c3/f1p0/1422	F02_cb3196_c3/f1p0/1422	F02_cb3196_c3/f1p0/1422	F02_cb3196_c3/f1p0/1422	F02_cb3196_c3/f1p0/1422
F01_cb15545_c31/f1p1/1340	NA	F01_cb15545_c31/f1p1/1340	NA	NA
F01_cb17432_c0/f7p0/582	F01_cb17432_c0/f7p0/582	F01_cb17432_c0/f7p0/582	NA	NA
F01_cb18494_c1/f1p0/797	F01_cb18494_c1/f1p0/797	F01_cb18494_c1/f1p0/797	F01_cb18494_c1/f1p0/797	F01_cb18494_c1/f1p0/797
F01_cb9595_c2/f1p0/2217	NA	NA	NA	F01_cb9595_c2/f1p0/2217
F02_cb8674_c0/f1p0/2194	NA	F02_cb8674_c0/f1p0/2194	NA	F02_cb8674_c0/f1p0/2194
F01_cb16991_c24/f1p0/1165	NA	NA	NA	F01_cb16991_c24/f1p0/1165
F01_cb17160_c8/f1p0/350	F01_cb17160_c8/f1p0/350	F01_cb17160_c8/f1p0/350	NA	NA
F01_cb17392_c2/f1p0/596	NA	NA	NA	F01_cb17392_c2/f1p0/596
F02_cb15687_c8/f1p0/788	NA	NA	NA	F02_cb15687_c8/f1p0/788
F01_cb4876_c3/f1p0/2177	F01_cb4876_c3/f1p0/2177	F01_cb4876_c3/f1p0/2177	F01_cb4876_c3/f1p0/2177	NA
F02_cb13928_c2/f2p0/381	F02_cb13928_c2/f2p0/381	F02_cb13928_c2/f2p0/381	F02_cb13928_c2/f2p0/381	F02_cb13928_c2/f2p0/381
F02_cb11041_c3163/f1p0/2180	NA	F02_cb11041_c3163/f1p0/2180	NA	NA
F02_cb3543_c0/f1p0/3105	NA	F02_cb3543_c0/f1p0/3105	NA	F02_cb3543_c0/f1p0/3105
F02_cb18163_c0/f1p0/885	NA	F02_cb18163_c0/f1p0/885	F02_cb18163_c0/f1p0/885	F02_cb18163_c0/f1p0/885
F01_cb14118_c0/f1p0/1025	F01_cb14118_c0/f1p0/1025	F01_cb14118_c0/f1p0/1025	F01_cb14118_c0/f1p0/1025	F01_cb14118_c0/f1p0/1025
F01_cb21018_c19/f1p0/638	F01_cb21018_c19/f1p0/638	F01_cb21018_c19/f1p0/638	F01_cb21018_c19/f1p0/638	F01_cb21018_c19/f1p0/638
F02_cb1772_c1/f1p0/3026	NA	NA	F02_cb1772_c1/f1p0/3026	NA
F02_cb6407_c6/f1p0/1831	NA	NA	NA	F02_cb6407_c6/f1p0/1831
F01_cb2646_c1/f1p0/3462	F01_cb2646_c1/f1p0/3462	F01_cb2646_c1/f1p0/3462	F01_cb2646_c1/f1p0/3462	F01_cb2646_c1/f1p0/3462
F02_cb14470_c1/f1p0/2235	NA	NA	NA	F02_cb14470_c1/f1p0/2235
F01_cb19360_c2/f1p0/1497	NA	NA	NA	F01_cb19360_c2/f1p0/1497
F02_cb8172_c12/f1p0/1568	F02_cb8172_c12/f1p0/1568	F02_cb8172_c12/f1p0/1568	F02_cb8172_c12/f1p0/1568	F02_cb8172_c12/f1p0/1568
F02_cb14164_c0/f1p0/856	F02_cb14164_c0/f1p0/856	F02_cb14164_c0/f1p0/856	NA	F02_cb14164_c0/f1p0/856
F01_cb13940_c3/f1p0/1136	NA	F01_cb13940_c3/f1p0/1136	NA	F01_cb13940_c3/f1p0/1136
F02_cb15290_c515/f1p1/1215	NA	F02_cb15290_c515/f1p1/1215	NA	NA
F01_cb16581_c0/f1p0/900	NA	F01_cb16581_c0/f1p0/900	F01_cb16581_c0/f1p0/900	F01_cb16581_c0/f1p0/900
F01_cb19802_c2/f1p0/470	F01_cb19802_c2/f1p0/470	F01_cb19802_c2/f1p0/470	F01_cb19802_c2/f1p0/470	F01_cb19802_c2/f1p0/470
F01_cb5774_c10/f1p0/690	F01_cb5774_c10/f1p0/690	F01_cb5774_c10/f1p0/690	F01_cb5774_c10/f1p0/690	F01_cb5774_c10/f1p0/690
F02_cb15555_c9/f1p0/755	NA	F02_cb15555_c9/f1p0/755	F02_cb15555_c9/f1p0/755	NA
F02_cb13107_c0/f2p0/1305	NA	NA	NA	F02_cb13107_c0/f2p0/1305
F01_cb8131_c4/f1p0/2064	NA	NA	NA	F01_cb8131_c4/f1p0/2064
F01_cb7758_c5/f1p0/1119	NA	NA	NA	F01_cb7758_c5/f1p0/1119
F01_cb8486_c4/f1p0/2081	NA	NA	NA	F01_cb8486_c4/f1p0/2081
F01_cb21027_c3/f2p0/438	NA	F01_cb21027_c3/f2p0/438	NA	NA
F01_cb13411_c1/f1p0/1635	NA	F01_cb13411_c1/f1p0/1635	F01_cb13411_c1/f1p0/1635	NA
F02_cb18564_c1/f1p0/1145	F02_cb18564_c1/f1p0/1145	F02_cb18564_c1/f1p0/1145	NA	F02_cb18564_c1/f1p0/1145
F01_cb15292_c5/f1p0/1347	NA	NA	NA	F01_cb15292_c5/f1p0/1347
F02_cb4568_c12/f1p0/1483	NA	NA	NA	F02_cb4568_c12/f1p0/1483
F01_cb21954_c1/f1p0/885	NA	F01_cb21954_c1/f1p0/885	NA	F01_cb21954_c1/f1p0/885
F02_cb11236_c9/f3p0/1775	NA	NA	NA	F02_cb11236_c9/f3p0/1775
F01_cb18382_c10/f1p0/725	NA	NA	NA	F01_cb18382_c10/f1p0/725
F02_cb17539_c1/f1p0/594	NA	F02_cb17539_c1/f1p0/594	F02_cb17539_c1/f1p0/594	F02_cb17539_c1/f1p0/594
F01_cb8311_c18/f1p0/478	NA	F01_cb8311_c18/f1p0/478	NA	F01_cb8311_c18/f1p0/478
F02_cb12965_c3/f1p0/1255	NA	NA	NA	F02_cb12965_c3/f1p0/1255
F01_cb12894_c12/f9p1/620	NA	F01_cb12894_c12/f9p1/620	NA	NA
F02_cb17461_c1/f1p0/352	F02_cb17461_c1/f1p0/352	F02_cb17461_c1/f1p0/352	F02_cb17461_c1/f1p0/352	F02_cb17461_c1/f1p0/352
F01_cb14968_c11/f1p1/1574	NA	F01_cb14968_c11/f1p1/1574	F01_cb14968_c11/f1p1/1574	F01_cb14968_c11/f1p1/1574
F02_cb15556_c3/f1p0/504	F02_cb15556_c3/f1p0/504	F02_cb15556_c3/f1p0/504	F02_cb15556_c3/f1p0/504	F02_cb15556_c3/f1p0/504
F01_cb22019_c1/f1p0/1442	NA	F01_cb22019_c1/f1p0/1442	NA	NA
F02_cb11041_c46933/f1p0/3179	NA	NA	NA	F02_cb11041_c46933/f1p0/3179
F01_cb19808_c56/f1p1/1485	NA	F01_cb19808_c56/f1p1/1485	NA	F01_cb19808_c56/f1p1/1485
F02_cb6738_c21/f1p0/5032	NA	F02_cb6738_c21/f1p0/5032	NA	F02_cb6738_c21/f1p0/5032
F01_cb4567_c6/f1p0/2335	NA	F01_cb4567_c6/f1p0/2335	NA	F01_cb4567_c6/f1p0/2335
F01_cb8122_c3/f1p0/2352	NA	NA	NA	F01_cb8122_c3/f1p0/2352
F02_cb18091_c1/f1p0/1144	F02_cb18091_c1/f1p0/1144	F02_cb18091_c1/f1p0/1144	NA	F02_cb18091_c1/f1p0/1144
F01_cb9865_c6/f1p0/1015	NA	F01_cb9865_c6/f1p0/1015	NA	NA
F01_cb10400_c10/f1p0/1656	NA	F01_cb10400_c10/f1p0/1656	NA	NA
F02_cb2813_c7/f1p0/2757	NA	NA	NA	F02_cb2813_c7/f1p0/2757
F02_cb13208_c13/f1p0/690	NA	F02_cb13208_c13/f1p0/690	NA	NA
F02_cb18682_c0/f2p0/708	NA	NA	NA	F02_cb18682_c0/f2p0/708
F02_cb16569_c1/f3p0/601	F02_cb16569_c1/f3p0/601	NA	F02_cb16569_c1/f3p0/601	F02_cb16569_c1/f3p0/601
F01_cb21578_c0/f2p0/924	NA	F01_cb21578_c0/f2p0/924	NA	NA
F02_cb9020_c1/f1p0/1902	NA	NA	NA	F02_cb9020_c1/f1p0/1902
F01_cb18482_c1/f3p0/1001	NA	NA	NA	F01_cb18482_c1/f3p0/1001
F01_cb9061_c1/f2p0/1618	F01_cb9061_c1/f2p0/1618	F01_cb9061_c1/f2p0/1618	NA	F01_cb9061_c1/f2p0/1618
F01_cb3926_c10/f1p0/1863	F01_cb3926_c10/f1p0/1863	F01_cb3926_c10/f1p0/1863	NA	F01_cb3926_c10/f1p0/1863
F02_cb18297_c1/f1p0/524	NA	F02_cb18297_c1/f1p0/524	NA	F02_cb18297_c1/f1p0/524
F02_cb18378_c0/f2p0/730	NA	NA	F02_cb18378_c0/f2p0/730	NA
F02_cb10656_c1/f1p0/2723	NA	NA	NA	F02_cb10656_c1/f1p0/2723
F02_cb17964_c85/f1p0/842	NA	NA	F02_cb17964_c85/f1p0/842	NA
F02_cb2927_c3/f1p0/3289	NA	NA	NA	F02_cb2927_c3/f1p0/3289
F02_cb11041_c77861/f2p0/2351	NA	NA	NA	F02_cb11041_c77861/f2p0/2351
F02_cb7912_c3/f1p0/2305	NA	F02_cb7912_c3/f1p0/2305	NA	NA
F02_cb11809_c2/f1p0/1832	NA	NA	NA	F02_cb11809_c2/f1p0/1832
F01_cb8181_c22/f1p0/1895	NA	NA	NA	F01_cb8181_c22/f1p0/1895
F01_cb8172_c13/f1p0/2503	NA	F01_cb8172_c13/f1p0/2503	NA	NA
F01_cb21213_c0/f2p0/692	NA	NA	NA	F01_cb21213_c0/f2p0/692
F01_cb13816_c2/f1p0/1387	NA	NA	NA	F01_cb13816_c2/f1p0/1387
F02_cb16447_c2/f2p0/529	F02_cb16447_c2/f2p0/529	NA	F02_cb16447_c2/f2p0/529	F02_cb16447_c2/f2p0/529
F01_cb3101_c101/f1p0/2712	NA	F01_cb3101_c101/f1p0/2712	NA	F01_cb3101_c101/f1p0/2712
F01_cb2187_c1/f1p0/2611	F01_cb2187_c1/f1p0/2611	F01_cb2187_c1/f1p0/2611	NA	F01_cb2187_c1/f1p0/2611
F01_cb3351_c2/f1p0/906	F01_cb3351_c2/f1p0/906	F01_cb3351_c2/f1p0/906	F01_cb3351_c2/f1p0/906	F01_cb3351_c2/f1p0/906
F02_cb323_c6/f1p0/3115	NA	NA	NA	F02_cb323_c6/f1p0/3115
F01_cb16674_c3/f1p0/880	NA	NA	NA	F01_cb16674_c3/f1p0/880
F01_cb22129_c0/f2p0/580	F01_cb22129_c0/f2p0/580	F01_cb22129_c0/f2p0/580	F01_cb22129_c0/f2p0/580	F01_cb22129_c0/f2p0/580
F01_cb12944_c2/f1p0/1622	NA	NA	NA	F01_cb12944_c2/f1p0/1622
F02_cb11041_c87454/f1p0/2290	F02_cb11041_c87454/f1p0/2290	F02_cb11041_c87454/f1p0/2290	F02_cb11041_c87454/f1p0/2290	F02_cb11041_c87454/f1p0/2290
F02_cb14079_c3/f1p0/2835	F02_cb14079_c3/f1p0/2835	F02_cb14079_c3/f1p0/2835	NA	NA
F02_cb7056_c1/f1p0/2432	F02_cb7056_c1/f1p0/2432	F02_cb7056_c1/f1p0/2432	F02_cb7056_c1/f1p0/2432	F02_cb7056_c1/f1p0/2432
F01_cb3647_c5/f1p0/2762	NA	NA	NA	F01_cb3647_c5/f1p0/2762
F02_cb12361_c1/f2p0/670	F02_cb12361_c1/f2p0/670	NA	F02_cb12361_c1/f2p0/670	F02_cb12361_c1/f2p0/670
F01_cb2648_c0/f4p2/5787	NA	NA	NA	F01_cb2648_c0/f4p2/5787
F02_cb11133_c3/f1p1/1687	NA	F02_cb11133_c3/f1p1/1687	NA	NA
F01_cb17152_c1/f1p0/1064	F01_cb17152_c1/f1p0/1064	F01_cb17152_c1/f1p0/1064	F01_cb17152_c1/f1p0/1064	F01_cb17152_c1/f1p0/1064
F02_cb14927_c1/f1p0/3483	F02_cb14927_c1/f1p0/3483	F02_cb14927_c1/f1p0/3483	F02_cb14927_c1/f1p0/3483	NA
F02_cb18640_c4/f1p0/1029	NA	F02_cb18640_c4/f1p0/1029	NA	NA
F01_cb15634_c14/f1p0/837	F01_cb15634_c14/f1p0/837	F01_cb15634_c14/f1p0/837	F01_cb15634_c14/f1p0/837	F01_cb15634_c14/f1p0/837
F01_cb21340_c1/f1p0/792	NA	F01_cb21340_c1/f1p0/792	NA	NA
F01_cb1818_c4/f1p0/3573	NA	NA	NA	F01_cb1818_c4/f1p0/3573
F02_cb15486_c4/f1p0/330	F02_cb15486_c4/f1p0/330	F02_cb15486_c4/f1p0/330	F02_cb15486_c4/f1p0/330	F02_cb15486_c4/f1p0/330
F01_cb6436_c0/f1p0/2593	NA	NA	NA	F01_cb6436_c0/f1p0/2593
F01_cb4908_c46/f1p0/1430	NA	NA	NA	F01_cb4908_c46/f1p0/1430
F01_cb10066_c19/f1p0/1874	NA	NA	NA	F01_cb10066_c19/f1p0/1874
F02_cb9878_c0/f1p0/2024	NA	F02_cb9878_c0/f1p0/2024	NA	NA
F01_cb5260_c11/f1p0/2064	NA	NA	NA	F01_cb5260_c11/f1p0/2064
F01_cb16438_c3575/f1p0/2089	NA	F01_cb16438_c3575/f1p0/2089	NA	NA
F01_cb9816_c0/f2p0/2152	NA	F01_cb9816_c0/f2p0/2152	NA	NA
F01_cb10337_c0/f1p0/2022	NA	F01_cb10337_c0/f1p0/2022	NA	NA
F01_cb16838_c4/f1p0/480	F01_cb16838_c4/f1p0/480	F01_cb16838_c4/f1p0/480	F01_cb16838_c4/f1p0/480	F01_cb16838_c4/f1p0/480
F02_cb5336_c6/f1p0/1259	NA	F02_cb5336_c6/f1p0/1259	NA	F02_cb5336_c6/f1p0/1259
F01_cb16438_c2495/f1p1/3162	NA	F01_cb16438_c2495/f1p1/3162	NA	NA
F02_cb4103_c1/f1p0/2679	NA	NA	NA	F02_cb4103_c1/f1p0/2679
F01_cb1904_c5/f1p0/5034	NA	NA	NA	F01_cb1904_c5/f1p0/5034
F01_cb6842_c2/f1p0/2710	NA	NA	NA	F01_cb6842_c2/f1p0/2710
F01_cb15154_c10/f1p0/566	NA	F01_cb15154_c10/f1p0/566	F01_cb15154_c10/f1p0/566	F01_cb15154_c10/f1p0/566
F01_cb12622_c0/f1p0/1685	NA	F01_cb12622_c0/f1p0/1685	NA	NA
F01_cb16438_c15123/f1p3/1596	NA	NA	F01_cb16438_c15123/f1p3/1596	NA
F01_cb20479_c3/f1p0/1609	F01_cb20479_c3/f1p0/1609	F01_cb20479_c3/f1p0/1609	NA	F01_cb20479_c3/f1p0/1609
F02_cb3840_c133/f1p0/862	NA	F02_cb3840_c133/f1p0/862	F02_cb3840_c133/f1p0/862	NA
F01_cb16438_c14678/f1p0/3154	NA	F01_cb16438_c14678/f1p0/3154	F01_cb16438_c14678/f1p0/3154	F01_cb16438_c14678/f1p0/3154
F01_cb2890_c91/f1p0/1060	NA	F01_cb2890_c91/f1p0/1060	F01_cb2890_c91/f1p0/1060	F01_cb2890_c91/f1p0/1060
F02_cb13215_c0/f1p0/1427	NA	F02_cb13215_c0/f1p0/1427	NA	NA
F02_cb11041_c2956/f1p0/2421	NA	F02_cb11041_c2956/f1p0/2421	F02_cb11041_c2956/f1p0/2421	F02_cb11041_c2956/f1p0/2421
F02_cb8172_c13/f1p0/1635	F02_cb8172_c13/f1p0/1635	F02_cb8172_c13/f1p0/1635	F02_cb8172_c13/f1p0/1635	F02_cb8172_c13/f1p0/1635
F01_cb9639_c3/f1p0/572	F01_cb9639_c3/f1p0/572	F01_cb9639_c3/f1p0/572	F01_cb9639_c3/f1p0/572	F01_cb9639_c3/f1p0/572
F02_cb4530_c15/f1p0/2487	NA	NA	NA	F02_cb4530_c15/f1p0/2487
F02_cb2024_c7/f1p0/1873	NA	NA	NA	F02_cb2024_c7/f1p0/1873
F01_cb7084_c5/f1p0/1661	NA	NA	NA	F01_cb7084_c5/f1p0/1661
F02_cb11041_c2888/f1p0/2311	F02_cb11041_c2888/f1p0/2311	F02_cb11041_c2888/f1p0/2311	F02_cb11041_c2888/f1p0/2311	NA
F02_cb11041_c2898/f1p0/2095	NA	NA	NA	F02_cb11041_c2898/f1p0/2095
F02_cb11041_c3794/f1p0/1455	NA	F02_cb11041_c3794/f1p0/1455	F02_cb11041_c3794/f1p0/1455	F02_cb11041_c3794/f1p0/1455
F01_cb15283_c25/f1p0/580	F01_cb15283_c25/f1p0/580	F01_cb15283_c25/f1p0/580	F01_cb15283_c25/f1p0/580	F01_cb15283_c25/f1p0/580
F02_cb11041_c80885/f2p1/1955	NA	F02_cb11041_c80885/f2p1/1955	F02_cb11041_c80885/f2p1/1955	F02_cb11041_c80885/f2p1/1955
F02_cb8396_c29/f1p0/2445	NA	F02_cb8396_c29/f1p0/2445	NA	F02_cb8396_c29/f1p0/2445
F02_cb9299_c2/f1p0/658	NA	F02_cb9299_c2/f1p0/658	NA	NA
F02_cb965_c6/f1p0/4070	NA	F02_cb965_c6/f1p0/4070	NA	NA
F02_cb4536_c19/f1p0/1274	NA	NA	NA	F02_cb4536_c19/f1p0/1274
F01_cb21688_c132/f1p0/491	F01_cb21688_c132/f1p0/491	F01_cb21688_c132/f1p0/491	F01_cb21688_c132/f1p0/491	F01_cb21688_c132/f1p0/491
F01_cb16779_c5/f1p0/711	NA	NA	NA	F01_cb16779_c5/f1p0/711
F01_cb12727_c1/f5p0/718	NA	F01_cb12727_c1/f5p0/718	NA	NA
F02_cb12544_c5/f1p0/1539	NA	F02_cb12544_c5/f1p0/1539	NA	NA
F01_cb16169_c2/f2p0/832	NA	F01_cb16169_c2/f2p0/832	NA	NA
F02_cb16683_c4/f1p0/1210	NA	F02_cb16683_c4/f1p0/1210	NA	NA
F01_cb15283_c36/f1p1/710	NA	NA	F01_cb15283_c36/f1p1/710	F01_cb15283_c36/f1p1/710
F01_cb16101_c0/f15p2/558	F01_cb16101_c0/f15p2/558	F01_cb16101_c0/f15p2/558	F01_cb16101_c0/f15p2/558	F01_cb16101_c0/f15p2/558
F02_cb11041_c4234/f1p0/2209	F02_cb11041_c4234/f1p0/2209	F02_cb11041_c4234/f1p0/2209	F02_cb11041_c4234/f1p0/2209	F02_cb11041_c4234/f1p0/2209
F01_cb14019_c4/f1p1/2817	NA	F01_cb14019_c4/f1p1/2817	NA	NA
F01_cb1204_c16/f1p0/1891	NA	F01_cb1204_c16/f1p0/1891	NA	NA
F02_cb14800_c0/f1p0/1196	NA	F02_cb14800_c0/f1p0/1196	NA	NA
F01_cb10885_c4/f1p0/1905	NA	NA	NA	F01_cb10885_c4/f1p0/1905
F02_cb10961_c3/f2p1/1871	NA	F02_cb10961_c3/f2p1/1871	F02_cb10961_c3/f2p1/1871	NA
F01_cb15069_c72/f1p0/677	NA	F01_cb15069_c72/f1p0/677	NA	NA
F02_cb12349_c2/f1p0/1352	NA	F02_cb12349_c2/f1p0/1352	NA	NA
F01_cb16438_c14108/f2p0/3676	NA	F01_cb16438_c14108/f2p0/3676	NA	NA
F01_cb19496_c212/f1p2/903	NA	F01_cb19496_c212/f1p2/903	F01_cb19496_c212/f1p2/903	F01_cb19496_c212/f1p2/903
F01_cb16438_c41113/f2p2/2503	NA	NA	F01_cb16438_c41113/f2p2/2503	NA
F01_cb15374_c7/f2p0/1275	NA	NA	NA	F01_cb15374_c7/f2p0/1275
F01_cb10115_c2/f1p0/2059	NA	F01_cb10115_c2/f1p0/2059	NA	NA
F01_cb17627_c3/f1p0/1432	F01_cb17627_c3/f1p0/1432	F01_cb17627_c3/f1p0/1432	F01_cb17627_c3/f1p0/1432	F01_cb17627_c3/f1p0/1432
F01_cb15080_c7/f1p0/334	F01_cb15080_c7/f1p0/334	F01_cb15080_c7/f1p0/334	F01_cb15080_c7/f1p0/334	F01_cb15080_c7/f1p0/334
F01_cb18542_c1/f1p0/1583	F01_cb18542_c1/f1p0/1583	F01_cb18542_c1/f1p0/1583	NA	F01_cb18542_c1/f1p0/1583
F02_cb7054_c6/f1p1/2237	NA	F02_cb7054_c6/f1p1/2237	NA	NA
F01_cb16438_c46244/f1p0/1636	NA	F01_cb16438_c46244/f1p0/1636	F01_cb16438_c46244/f1p0/1636	F01_cb16438_c46244/f1p0/1636
F02_cb12373_c0/f2p0/1631	NA	NA	NA	F02_cb12373_c0/f2p0/1631
F02_cb7911_c16/f1p0/1951	NA	F02_cb7911_c16/f1p0/1951	NA	F02_cb7911_c16/f1p0/1951
F01_cb8421_c18/f1p0/1174	NA	F01_cb8421_c18/f1p0/1174	NA	NA
F01_cb9354_c8/f1p0/809	NA	F01_cb9354_c8/f1p0/809	NA	NA
F01_cb16007_c6/f1p0/1254	NA	NA	NA	F01_cb16007_c6/f1p0/1254
F01_cb19496_c205/f1p1/532	NA	F01_cb19496_c205/f1p1/532	F01_cb19496_c205/f1p1/532	F01_cb19496_c205/f1p1/532
F02_cb17999_c2/f1p0/402	F02_cb17999_c2/f1p0/402	F02_cb17999_c2/f1p0/402	F02_cb17999_c2/f1p0/402	F02_cb17999_c2/f1p0/402
F01_cb7035_c17/f1p0/978	NA	NA	NA	F01_cb7035_c17/f1p0/978
F01_cb4379_c5/f2p0/485	F01_cb4379_c5/f2p0/485	F01_cb4379_c5/f2p0/485	F01_cb4379_c5/f2p0/485	F01_cb4379_c5/f2p0/485
F01_cb9127_c3/f1p0/1079	NA	F01_cb9127_c3/f1p0/1079	NA	NA
F01_cb16438_c44756/f1p0/1613	NA	F01_cb16438_c44756/f1p0/1613	F01_cb16438_c44756/f1p0/1613	F01_cb16438_c44756/f1p0/1613
F02_cb17460_c3/f1p1/615	F02_cb17460_c3/f1p1/615	F02_cb17460_c3/f1p1/615	F02_cb17460_c3/f1p1/615	F02_cb17460_c3/f1p1/615
F02_cb4235_c12/f1p0/2584	NA	F02_cb4235_c12/f1p0/2584	NA	NA
F01_cb14993_c303/f1p0/547	NA	NA	F01_cb14993_c303/f1p0/547	NA
F02_cb17809_c1/f1p0/718	F02_cb17809_c1/f1p0/718	NA	NA	NA
F01_cb13515_c15/f2p0/301	F01_cb13515_c15/f2p0/301	F01_cb13515_c15/f2p0/301	F01_cb13515_c15/f2p0/301	F01_cb13515_c15/f2p0/301
F01_cb1709_c2/f11p4/1776	NA	NA	NA	F01_cb1709_c2/f11p4/1776
F02_cb13297_c1/f4p0/1248	NA	NA	NA	F02_cb13297_c1/f4p0/1248
F01_cb19496_c262/f1p0/600	F01_cb19496_c262/f1p0/600	F01_cb19496_c262/f1p0/600	F01_cb19496_c262/f1p0/600	F01_cb19496_c262/f1p0/600
F02_cb11041_c89253/f1p0/1608	NA	NA	NA	F02_cb11041_c89253/f1p0/1608
F02_cb11041_c41476/f2p0/4415	NA	F02_cb11041_c41476/f2p0/4415	F02_cb11041_c41476/f2p0/4415	F02_cb11041_c41476/f2p0/4415
F02_cb13790_c0/f1p0/697	F02_cb13790_c0/f1p0/697	F02_cb13790_c0/f1p0/697	F02_cb13790_c0/f1p0/697	F02_cb13790_c0/f1p0/697
F02_cb92_c2/f1p0/4616	NA	NA	NA	F02_cb92_c2/f1p0/4616
F01_cb15845_c1/f1p0/557	NA	F01_cb15845_c1/f1p0/557	NA	F01_cb15845_c1/f1p0/557
F01_cb19507_c5/f1p0/1126	NA	NA	NA	F01_cb19507_c5/f1p0/1126
F01_cb20644_c1/f1p0/816	NA	F01_cb20644_c1/f1p0/816	NA	F01_cb20644_c1/f1p0/816
F01_cb13686_c1/f1p0/861	F01_cb13686_c1/f1p0/861	F01_cb13686_c1/f1p0/861	NA	NA
F02_cb11064_c0/f1p0/1851	NA	NA	NA	F02_cb11064_c0/f1p0/1851
F01_cb19646_c2/f1p0/1348	F01_cb19646_c2/f1p0/1348	F01_cb19646_c2/f1p0/1348	NA	NA
F01_cb8296_c8/f1p0/2047	NA	NA	NA	F01_cb8296_c8/f1p0/2047
F01_cb11735_c2/f1p0/519	NA	F01_cb11735_c2/f1p0/519	NA	NA
F01_cb6525_c16/f1p0/2072	NA	F01_cb6525_c16/f1p0/2072	NA	NA
F02_cb10940_c3/f1p0/1581	NA	F02_cb10940_c3/f1p0/1581	NA	NA
F02_cb2730_c7/f1p0/1968	NA	F02_cb2730_c7/f1p0/1968	NA	NA
F02_cb15887_c0/f1p0/870	NA	F02_cb15887_c0/f1p0/870	F02_cb15887_c0/f1p0/870	F02_cb15887_c0/f1p0/870
F01_cb4045_c3/f1p0/3077	NA	NA	NA	F01_cb4045_c3/f1p0/3077
F01_cb4063_c27/f1p0/2116	NA	F01_cb4063_c27/f1p0/2116	NA	NA
F01_cb9739_c1/f1p0/1450	F01_cb9739_c1/f1p0/1450	F01_cb9739_c1/f1p0/1450	F01_cb9739_c1/f1p0/1450	F01_cb9739_c1/f1p0/1450
F01_cb9644_c4/f1p0/2113	NA	F01_cb9644_c4/f1p0/2113	NA	F01_cb9644_c4/f1p0/2113
F02_cb12790_c119/f1p0/617	F02_cb12790_c119/f1p0/617	F02_cb12790_c119/f1p0/617	F02_cb12790_c119/f1p0/617	F02_cb12790_c119/f1p0/617
F01_cb16438_c11660/f1p0/2116	F01_cb16438_c11660/f1p0/2116	F01_cb16438_c11660/f1p0/2116	NA	NA
F01_cb16438_c9843/f1p1/2085	NA	NA	F01_cb16438_c9843/f1p1/2085	F01_cb16438_c9843/f1p1/2085
F01_cb20584_c1/f1p0/399	NA	NA	NA	F01_cb20584_c1/f1p0/399
F02_cb17831_c1/f1p0/620	NA	F02_cb17831_c1/f1p0/620	NA	NA
F02_cb14064_c3/f1p0/1760	NA	F02_cb14064_c3/f1p0/1760	NA	NA
F01_cb9601_c0/f1p0/2122	F01_cb9601_c0/f1p0/2122	F01_cb9601_c0/f1p0/2122	F01_cb9601_c0/f1p0/2122	F01_cb9601_c0/f1p0/2122
F02_cb2485_c147/f1p0/3282	NA	F02_cb2485_c147/f1p0/3282	NA	NA
F01_cb5872_c6/f1p3/2692	NA	NA	NA	F01_cb5872_c6/f1p3/2692
F01_cb16438_c3318/f1p0/2261	NA	F01_cb16438_c3318/f1p0/2261	NA	NA
F02_cb2247_c4/f1p0/3415	NA	NA	NA	F02_cb2247_c4/f1p0/3415
F01_cb20546_c1/f1p0/682	NA	F01_cb20546_c1/f1p0/682	NA	NA
F01_cb101_c10/f1p0/4456	NA	NA	NA	F01_cb101_c10/f1p0/4456
F01_cb1355_c17/f1p0/2388	NA	F01_cb1355_c17/f1p0/2388	NA	NA
F01_cb9964_c3/f1p0/1779	F01_cb9964_c3/f1p0/1779	F01_cb9964_c3/f1p0/1779	F01_cb9964_c3/f1p0/1779	F01_cb9964_c3/f1p0/1779
F01_cb1895_c7/f1p0/972	F01_cb1895_c7/f1p0/972	F01_cb1895_c7/f1p0/972	NA	NA
F02_cb5235_c24/f8p1/2400	NA	NA	NA	F02_cb5235_c24/f8p1/2400
F01_cb18813_c0/f1p0/564	NA	F01_cb18813_c0/f1p0/564	F01_cb18813_c0/f1p0/564	F01_cb18813_c0/f1p0/564
F02_cb11041_c87368/f2p0/2347	NA	NA	NA	F02_cb11041_c87368/f2p0/2347
F02_cb1547_c14/f1p0/2020	NA	NA	NA	F02_cb1547_c14/f1p0/2020
F02_cb9875_c1/f3p0/2026	NA	NA	NA	F02_cb9875_c1/f3p0/2026
F01_cb21467_c1/f1p0/607	NA	NA	NA	F01_cb21467_c1/f1p0/607
F02_cb13789_c1/f1p0/1577	NA	F02_cb13789_c1/f1p0/1577	NA	F02_cb13789_c1/f1p0/1577
F01_cb16618_c4/f1p0/1234	NA	NA	NA	F01_cb16618_c4/f1p0/1234
F02_cb17347_c1/f1p0/1111	NA	F02_cb17347_c1/f1p0/1111	NA	NA
F01_cb4924_c4/f1p0/1506	NA	NA	NA	F01_cb4924_c4/f1p0/1506
F02_cb10237_c7/f1p0/1877	NA	NA	NA	F02_cb10237_c7/f1p0/1877
F02_cb18157_c0/f1p0/710	NA	F02_cb18157_c0/f1p0/710	NA	NA
F01_cb3847_c6/f1p0/1646	NA	NA	F01_cb3847_c6/f1p0/1646	F01_cb3847_c6/f1p0/1646
F01_cb15594_c3/f2p0/388	F01_cb15594_c3/f2p0/388	NA	F01_cb15594_c3/f2p0/388	F01_cb15594_c3/f2p0/388
F02_cb15691_c6/f1p1/512	NA	F02_cb15691_c6/f1p1/512	F02_cb15691_c6/f1p1/512	NA
F01_cb15412_c3/f2p0/1125	NA	F01_cb15412_c3/f2p0/1125	NA	NA
F02_cb3545_c0/f1p0/3070	NA	NA	NA	F02_cb3545_c0/f1p0/3070
F01_cb18205_c1/f1p0/941	NA	F01_cb18205_c1/f1p0/941	NA	NA
F02_cb18819_c4/f1p0/932	NA	F02_cb18819_c4/f1p0/932	NA	F02_cb18819_c4/f1p0/932
F01_cb22174_c0/f2p0/386	F01_cb22174_c0/f2p0/386	F01_cb22174_c0/f2p0/386	F01_cb22174_c0/f2p0/386	F01_cb22174_c0/f2p0/386
F01_cb18564_c0/f2p0/661	NA	NA	NA	F01_cb18564_c0/f2p0/661
F01_cb21891_c0/f2p0/442	NA	F01_cb21891_c0/f2p0/442	NA	NA
F01_cb12029_c2/f1p0/306	F01_cb12029_c2/f1p0/306	F01_cb12029_c2/f1p0/306	F01_cb12029_c2/f1p0/306	F01_cb12029_c2/f1p0/306
F01_cb17372_c1/f1p0/835	F01_cb17372_c1/f1p0/835	F01_cb17372_c1/f1p0/835	NA	NA
F01_cb2639_c6/f1p0/2461	NA	F01_cb2639_c6/f1p0/2461	NA	NA
F01_cb1436_c14/f1p0/2086	NA	F01_cb1436_c14/f1p0/2086	NA	NA
F02_cb17486_c0/f1p0/1062	F02_cb17486_c0/f1p0/1062	F02_cb17486_c0/f1p0/1062	F02_cb17486_c0/f1p0/1062	F02_cb17486_c0/f1p0/1062
F01_cb17436_c7/f1p0/551	F01_cb17436_c7/f1p0/551	F01_cb17436_c7/f1p0/551	NA	NA
F01_cb12592_c4/f1p0/3239	NA	F01_cb12592_c4/f1p0/3239	NA	NA
F01_cb10202_c4/f1p0/1346	NA	NA	NA	F01_cb10202_c4/f1p0/1346
F02_cb14847_c1/f1p0/1289	F02_cb14847_c1/f1p0/1289	F02_cb14847_c1/f1p0/1289	NA	F02_cb14847_c1/f1p0/1289
F01_cb17312_c2/f1p0/539	NA	NA	NA	F01_cb17312_c2/f1p0/539
F01_cb3101_c118/f1p0/2546	NA	F01_cb3101_c118/f1p0/2546	NA	F01_cb3101_c118/f1p0/2546
F02_cb6466_c1/f1p0/2074	NA	NA	NA	F02_cb6466_c1/f1p0/2074
F02_cb4701_c5/f1p0/2648	NA	F02_cb4701_c5/f1p0/2648	NA	NA
F01_cb3252_c9/f1p0/1442	NA	F01_cb3252_c9/f1p0/1442	NA	NA
F02_cb18348_c0/f1p0/486	F02_cb18348_c0/f1p0/486	F02_cb18348_c0/f1p0/486	F02_cb18348_c0/f1p0/486	F02_cb18348_c0/f1p0/486
F01_cb9339_c45/f1p0/3746	F01_cb9339_c45/f1p0/3746	F01_cb9339_c45/f1p0/3746	NA	F01_cb9339_c45/f1p0/3746
F01_cb13_c33/f1p0/2863	NA	F01_cb13_c33/f1p0/2863	NA	NA
F02_cb15051_c2/f1p1/524	NA	F02_cb15051_c2/f1p1/524	F02_cb15051_c2/f1p1/524	F02_cb15051_c2/f1p1/524
F02_cb2143_c1/f1p0/3256	NA	NA	NA	F02_cb2143_c1/f1p0/3256
F01_cb10202_c5/f1p0/603	NA	F01_cb10202_c5/f1p0/603	NA	F01_cb10202_c5/f1p0/603
F02_cb6051_c2/f1p0/1238	NA	NA	NA	F02_cb6051_c2/f1p0/1238
F01_cb9604_c418/f1p0/2505	NA	F01_cb9604_c418/f1p0/2505	NA	F01_cb9604_c418/f1p0/2505
F02_cb18530_c1/f1p0/752	F02_cb18530_c1/f1p0/752	F02_cb18530_c1/f1p0/752	F02_cb18530_c1/f1p0/752	F02_cb18530_c1/f1p0/752
F01_cb19160_c18/f1p0/786	F01_cb19160_c18/f1p0/786	F01_cb19160_c18/f1p0/786	F01_cb19160_c18/f1p0/786	NA
F02_cb2352_c51/f1p0/2254	NA	F02_cb2352_c51/f1p0/2254	NA	NA
F01_cb7431_c7/f1p1/2290	NA	NA	NA	F01_cb7431_c7/f1p1/2290
F01_cb20647_c3/f1p0/816	NA	NA	NA	F01_cb20647_c3/f1p0/816
F02_cb20_c11/f1p1/4904	NA	NA	NA	F02_cb20_c11/f1p1/4904
F02_cb13407_c4/f1p0/1485	NA	NA	NA	F02_cb13407_c4/f1p0/1485
F01_cb21655_c0/f1p0/1168	NA	F01_cb21655_c0/f1p0/1168	NA	F01_cb21655_c0/f1p0/1168
F01_cb13123_c5/f1p0/1060	F01_cb13123_c5/f1p0/1060	F01_cb13123_c5/f1p0/1060	F01_cb13123_c5/f1p0/1060	F01_cb13123_c5/f1p0/1060
F02_cb18090_c1/f1p0/750	NA	NA	NA	F02_cb18090_c1/f1p0/750
F01_cb17997_c3/f1p0/943	NA	F01_cb17997_c3/f1p0/943	F01_cb17997_c3/f1p0/943	F01_cb17997_c3/f1p0/943
F02_cb9215_c4/f1p0/1177	NA	F02_cb9215_c4/f1p0/1177	NA	NA
F01_cb16438_c37405/f2p1/2088	NA	F01_cb16438_c37405/f2p1/2088	F01_cb16438_c37405/f2p1/2088	F01_cb16438_c37405/f2p1/2088
F02_cb9548_c4/f2p0/1484	NA	NA	NA	F02_cb9548_c4/f2p0/1484
F01_cb16072_c4/f1p0/667	NA	F01_cb16072_c4/f1p0/667	NA	F01_cb16072_c4/f1p0/667
F01_cb14465_c1/f1p0/2190	NA	NA	NA	F01_cb14465_c1/f1p0/2190
F02_cb11041_c1981/f2p0/1836	NA	NA	NA	F02_cb11041_c1981/f2p0/1836
F02_cb15805_c0/f5p0/452	NA	F02_cb15805_c0/f5p0/452	NA	F02_cb15805_c0/f5p0/452
F02_cb17421_c1/f1p0/426	NA	F02_cb17421_c1/f1p0/426	F02_cb17421_c1/f1p0/426	F02_cb17421_c1/f1p0/426
F02_cb4875_c11/f1p0/1306	NA	NA	NA	F02_cb4875_c11/f1p0/1306
F02_cb19416_c0/f1p0/379	F02_cb19416_c0/f1p0/379	F02_cb19416_c0/f1p0/379	F02_cb19416_c0/f1p0/379	F02_cb19416_c0/f1p0/379
F02_cb2550_c6/f1p0/2580	NA	NA	NA	F02_cb2550_c6/f1p0/2580
F02_cb14478_c0/f1p0/330	F02_cb14478_c0/f1p0/330	F02_cb14478_c0/f1p0/330	F02_cb14478_c0/f1p0/330	NA
F02_cb694_c6/f1p0/973	NA	F02_cb694_c6/f1p0/973	NA	F02_cb694_c6/f1p0/973
F02_cb13787_c28/f1p0/823	NA	F02_cb13787_c28/f1p0/823	NA	F02_cb13787_c28/f1p0/823
F01_cb16438_c42945/f1p1/2534	NA	F01_cb16438_c42945/f1p1/2534	F01_cb16438_c42945/f1p1/2534	F01_cb16438_c42945/f1p1/2534
F02_cb7069_c8/f1p0/1947	NA	F02_cb7069_c8/f1p0/1947	NA	F02_cb7069_c8/f1p0/1947
F02_cb7911_c14/f1p0/2757	NA	F02_cb7911_c14/f1p0/2757	NA	F02_cb7911_c14/f1p0/2757
F01_cb21688_c178/f1p0/965	NA	NA	NA	F01_cb21688_c178/f1p0/965
F01_cb11988_c2/f2p1/1610	NA	NA	NA	F01_cb11988_c2/f2p1/1610
F02_cb353_c6/f1p0/1920	NA	F02_cb353_c6/f1p0/1920	NA	NA
F02_cb16167_c0/f1p0/959	F02_cb16167_c0/f1p0/959	F02_cb16167_c0/f1p0/959	NA	NA
F01_cb8954_c22/f1p0/1421	NA	F01_cb8954_c22/f1p0/1421	F01_cb8954_c22/f1p0/1421	F01_cb8954_c22/f1p0/1421
F02_cb17219_c0/f2p0/817	NA	NA	NA	F02_cb17219_c0/f2p0/817
F01_cb16438_c57202/f1p0/2926	NA	NA	NA	F01_cb16438_c57202/f1p0/2926
F02_cb10205_c1/f1p0/2341	NA	F02_cb10205_c1/f1p0/2341	NA	NA
F01_cb16274_c1/f1p0/652	NA	F01_cb16274_c1/f1p0/652	F01_cb16274_c1/f1p0/652	NA
F02_cb3580_c22/f1p0/839	NA	F02_cb3580_c22/f1p0/839	NA	F02_cb3580_c22/f1p0/839
F02_cb11041_c43561/f1p0/3751	NA	NA	NA	F02_cb11041_c43561/f1p0/3751
F01_cb14350_c1/f1p0/1976	F01_cb14350_c1/f1p0/1976	F01_cb14350_c1/f1p0/1976	NA	F01_cb14350_c1/f1p0/1976
F01_cb4876_c6/f1p0/2621	F01_cb4876_c6/f1p0/2621	F01_cb4876_c6/f1p0/2621	F01_cb4876_c6/f1p0/2621	NA
F02_cb11837_c3/f1p0/1586	NA	F02_cb11837_c3/f1p0/1586	NA	F02_cb11837_c3/f1p0/1586
F02_cb17912_c3/f1p0/746	NA	F02_cb17912_c3/f1p0/746	NA	NA
F01_cb16438_c23601/f1p0/1929	NA	F01_cb16438_c23601/f1p0/1929	F01_cb16438_c23601/f1p0/1929	NA
F01_cb686_c30/f1p2/3552	NA	NA	NA	F01_cb686_c30/f1p2/3552
F01_cb16388_c1/f1p0/632	F01_cb16388_c1/f1p0/632	F01_cb16388_c1/f1p0/632	NA	F01_cb16388_c1/f1p0/632
F02_cb15928_c1/f3p7/360	F02_cb15928_c1/f3p7/360	F02_cb15928_c1/f3p7/360	F02_cb15928_c1/f3p7/360	F02_cb15928_c1/f3p7/360
F02_cb9047_c4/f1p0/2105	NA	F02_cb9047_c4/f1p0/2105	NA	NA
F02_cb17810_c0/f2p0/1038	NA	NA	NA	F02_cb17810_c0/f2p0/1038
F02_cb8615_c1/f1p0/2202	NA	F02_cb8615_c1/f1p0/2202	NA	NA
F02_cb8346_c10/f1p0/1792	NA	NA	NA	F02_cb8346_c10/f1p0/1792
F02_cb16701_c2/f1p0/529	NA	F02_cb16701_c2/f1p0/529	NA	F02_cb16701_c2/f1p0/529
F01_cb3101_c122/f1p0/2520	NA	F01_cb3101_c122/f1p0/2520	NA	NA
F01_cb8945_c1/f1p0/2213	NA	F01_cb8945_c1/f1p0/2213	NA	F01_cb8945_c1/f1p0/2213
F02_cb18805_c0/f2p1/454	NA	F02_cb18805_c0/f2p1/454	NA	NA
F01_cb1841_c14/f1p0/618	NA	NA	NA	F01_cb1841_c14/f1p0/618
F02_cb7740_c1/f1p0/2087	F02_cb7740_c1/f1p0/2087	F02_cb7740_c1/f1p0/2087	F02_cb7740_c1/f1p0/2087	NA
F01_cb7069_c6/f1p0/2074	NA	F01_cb7069_c6/f1p0/2074	F01_cb7069_c6/f1p0/2074	NA
F01_cb21398_c0/f1p0/596	F01_cb21398_c0/f1p0/596	F01_cb21398_c0/f1p0/596	F01_cb21398_c0/f1p0/596	F01_cb21398_c0/f1p0/596
F02_cb2741_c1/f1p0/3759	NA	NA	F02_cb2741_c1/f1p0/3759	NA
F02_cb11041_c2910/f1p0/2532	NA	F02_cb11041_c2910/f1p0/2532	NA	NA
F02_cb14642_c2/f1p0/2577	NA	F02_cb14642_c2/f1p0/2577	NA	NA
F01_cb17393_c2/f1p0/818	NA	F01_cb17393_c2/f1p0/818	NA	F01_cb17393_c2/f1p0/818
F01_cb14972_c6/f1p0/485	NA	NA	NA	F01_cb14972_c6/f1p0/485
F01_cb10524_c0/f8p1/813	NA	F01_cb10524_c0/f8p1/813	NA	NA
F01_cb5540_c11/f1p0/1690	NA	NA	NA	F01_cb5540_c11/f1p0/1690
F02_cb4045_c20/f1p0/2317	NA	NA	NA	F02_cb4045_c20/f1p0/2317
F02_cb1222_c39/f1p0/2326	NA	NA	NA	F02_cb1222_c39/f1p0/2326
F01_cb4958_c19/f1p0/3203	NA	NA	NA	F01_cb4958_c19/f1p0/3203
F02_cb16635_c4/f1p0/630	NA	NA	NA	F02_cb16635_c4/f1p0/630
F02_cb4677_c44/f1p0/2483	NA	NA	NA	F02_cb4677_c44/f1p0/2483
F02_cb9240_c1/f1p0/2144	NA	NA	NA	F02_cb9240_c1/f1p0/2144
F01_cb1650_c5/f1p0/1924	NA	F01_cb1650_c5/f1p0/1924	NA	NA
F01_cb19541_c0/f2p0/1427	NA	F01_cb19541_c0/f2p0/1427	F01_cb19541_c0/f2p0/1427	F01_cb19541_c0/f2p0/1427
F01_cb15475_c2/f1p0/834	NA	NA	NA	F01_cb15475_c2/f1p0/834
F02_cb2265_c3/f3p1/2257	NA	NA	NA	F02_cb2265_c3/f3p1/2257
F02_cb3389_c34/f1p0/4608	F02_cb3389_c34/f1p0/4608	F02_cb3389_c34/f1p0/4608	F02_cb3389_c34/f1p0/4608	NA
F02_cb1881_c7/f1p0/3028	NA	NA	NA	F02_cb1881_c7/f1p0/3028
F02_cb14433_c0/f4p0/637	NA	NA	NA	F02_cb14433_c0/f4p0/637
F02_cb124_c3/f1p0/1228	NA	F02_cb124_c3/f1p0/1228	NA	NA
F01_cb12450_c5/f1p0/740	NA	NA	NA	F01_cb12450_c5/f1p0/740
F01_cb22109_c2/f1p0/725	NA	NA	F01_cb22109_c2/f1p0/725	F01_cb22109_c2/f1p0/725
F01_cb19861_c0/f1p0/1404	NA	F01_cb19861_c0/f1p0/1404	F01_cb19861_c0/f1p0/1404	F01_cb19861_c0/f1p0/1404
F01_cb12131_c1/f1p0/1843	NA	F01_cb12131_c1/f1p0/1843	NA	NA
F01_cb16629_c2/f1p0/1212	NA	F01_cb16629_c2/f1p0/1212	NA	NA
F02_cb5549_c9/f1p0/2537	NA	F02_cb5549_c9/f1p0/2537	NA	NA
F02_cb15267_c3/f1p0/675	F02_cb15267_c3/f1p0/675	NA	F02_cb15267_c3/f1p0/675	F02_cb15267_c3/f1p0/675
F02_cb12751_c5/f1p0/1214	NA	F02_cb12751_c5/f1p0/1214	NA	F02_cb12751_c5/f1p0/1214
F02_cb18148_c1/f1p1/389	F02_cb18148_c1/f1p1/389	F02_cb18148_c1/f1p1/389	F02_cb18148_c1/f1p1/389	F02_cb18148_c1/f1p1/389
F02_cb6389_c9/f1p0/1647	NA	F02_cb6389_c9/f1p0/1647	NA	NA
F02_cb10214_c8/f1p0/782	F02_cb10214_c8/f1p0/782	F02_cb10214_c8/f1p0/782	F02_cb10214_c8/f1p0/782	F02_cb10214_c8/f1p0/782
F01_cb12626_c10/f1p0/1319	NA	NA	NA	F01_cb12626_c10/f1p0/1319
F01_cb17737_c1/f1p0/539	F01_cb17737_c1/f1p0/539	F01_cb17737_c1/f1p0/539	F01_cb17737_c1/f1p0/539	F01_cb17737_c1/f1p0/539
F01_cb16438_c4920/f1p0/3279	NA	F01_cb16438_c4920/f1p0/3279	NA	NA
F01_cb13561_c5/f1p0/1396	NA	NA	NA	F01_cb13561_c5/f1p0/1396
F01_cb8806_c7/f1p1/2292	NA	NA	NA	F01_cb8806_c7/f1p1/2292
F02_cb19446_c1/f1p0/1209	NA	F02_cb19446_c1/f1p0/1209	F02_cb19446_c1/f1p0/1209	F02_cb19446_c1/f1p0/1209
F02_cb2445_c0/f1p0/3403	NA	F02_cb2445_c0/f1p0/3403	NA	NA
F01_cb5722_c2/f1p0/2719	F01_cb5722_c2/f1p0/2719	F01_cb5722_c2/f1p0/2719	NA	F01_cb5722_c2/f1p0/2719
F02_cb18252_c4/f1p0/318	F02_cb18252_c4/f1p0/318	F02_cb18252_c4/f1p0/318	NA	NA
F01_cb8333_c6/f1p0/2268	F01_cb8333_c6/f1p0/2268	F01_cb8333_c6/f1p0/2268	NA	NA
F02_cb8088_c8/f1p0/1787	NA	F02_cb8088_c8/f1p0/1787	NA	NA
F01_cb21299_c0/f1p0/705	F01_cb21299_c0/f1p0/705	F01_cb21299_c0/f1p0/705	F01_cb21299_c0/f1p0/705	F01_cb21299_c0/f1p0/705
F01_cb16438_c9156/f2p0/2647	NA	F01_cb16438_c9156/f2p0/2647	NA	NA
F01_cb18722_c2/f1p0/379	F01_cb18722_c2/f1p0/379	F01_cb18722_c2/f1p0/379	F01_cb18722_c2/f1p0/379	F01_cb18722_c2/f1p0/379
F01_cb21688_c239/f1p0/310	F01_cb21688_c239/f1p0/310	F01_cb21688_c239/f1p0/310	F01_cb21688_c239/f1p0/310	F01_cb21688_c239/f1p0/310
F01_cb570_c0/f6p0/4090	NA	NA	NA	F01_cb570_c0/f6p0/4090
F01_cb3819_c23/f7p0/1933	NA	NA	NA	F01_cb3819_c23/f7p0/1933
F01_cb3822_c0/f1p0/3093	NA	F01_cb3822_c0/f1p0/3093	F01_cb3822_c0/f1p0/3093	NA
F02_cb10206_c0/f2p0/1976	NA	NA	NA	F02_cb10206_c0/f2p0/1976
F01_cb21138_c0/f1p0/412	F01_cb21138_c0/f1p0/412	F01_cb21138_c0/f1p0/412	F01_cb21138_c0/f1p0/412	F01_cb21138_c0/f1p0/412
F02_cb1024_c16/f1p0/1624	NA	F02_cb1024_c16/f1p0/1624	NA	NA
F01_cb11844_c4/f1p0/1283	NA	NA	NA	F01_cb11844_c4/f1p0/1283
F01_cb14764_c1/f1p0/2160	F01_cb14764_c1/f1p0/2160	F01_cb14764_c1/f1p0/2160	NA	NA
F01_cb2834_c10/f2p0/2342	NA	NA	NA	F01_cb2834_c10/f2p0/2342
F01_cb5832_c3/f1p0/4684	NA	NA	NA	F01_cb5832_c3/f1p0/4684
F01_cb16438_c39021/f1p0/2043	NA	NA	NA	F01_cb16438_c39021/f1p0/2043
F02_cb2628_c7/f1p1/2229	NA	F02_cb2628_c7/f1p1/2229	NA	F02_cb2628_c7/f1p1/2229
F01_cb4368_c13/f1p0/2218	NA	F01_cb4368_c13/f1p0/2218	NA	NA
F01_cb2245_c2/f2p0/2003	NA	NA	NA	F01_cb2245_c2/f2p0/2003
F01_cb5957_c17/f1p0/1728	NA	NA	NA	F01_cb5957_c17/f1p0/1728
F02_cb1606_c61/f1p0/2773	NA	F02_cb1606_c61/f1p0/2773	NA	NA
F01_cb13140_c8/f1p0/687	NA	F01_cb13140_c8/f1p0/687	NA	NA
F02_cb4055_c2/f1p1/2985	NA	NA	NA	F02_cb4055_c2/f1p1/2985
F02_cb16713_c321/f1p0/918	NA	NA	NA	F02_cb16713_c321/f1p0/918
F02_cb19196_c5/f1p0/450	F02_cb19196_c5/f1p0/450	F02_cb19196_c5/f1p0/450	F02_cb19196_c5/f1p0/450	F02_cb19196_c5/f1p0/450
F02_cb1032_c34/f1p0/2900	NA	NA	NA	F02_cb1032_c34/f1p0/2900
F01_cb4090_c1/f1p0/2171	NA	F01_cb4090_c1/f1p0/2171	NA	NA
F02_cb6346_c2/f1p0/2535	NA	F02_cb6346_c2/f1p0/2535	NA	NA
F01_cb4565_c14/f1p0/1191	NA	NA	NA	F01_cb4565_c14/f1p0/1191
F02_cb9115_c4/f1p0/1834	NA	NA	NA	F02_cb9115_c4/f1p0/1834
F01_cb2132_c19/f1p1/2459	NA	NA	NA	F01_cb2132_c19/f1p1/2459
F01_cb15549_c3/f1p1/1226	NA	NA	NA	F01_cb15549_c3/f1p1/1226
F01_cb17177_c5/f2p1/994	NA	NA	NA	F01_cb17177_c5/f2p1/994
F01_cb20954_c2/f1p0/1355	NA	NA	NA	F01_cb20954_c2/f1p0/1355
F02_cb11041_c1590/f1p0/2401	NA	F02_cb11041_c1590/f1p0/2401	F02_cb11041_c1590/f1p0/2401	NA
F02_cb4331_c0/f1p0/2920	NA	F02_cb4331_c0/f1p0/2920	NA	NA
F02_cb7332_c3/f1p0/1853	NA	NA	NA	F02_cb7332_c3/f1p0/1853
F02_cb4781_c0/f1p0/2834	NA	NA	NA	F02_cb4781_c0/f1p0/2834
F01_cb733_c0/f1p0/4092	NA	F01_cb733_c0/f1p0/4092	F01_cb733_c0/f1p0/4092	NA
F01_cb11088_c7/f1p0/1815	NA	NA	NA	F01_cb11088_c7/f1p0/1815
F01_cb740_c11/f1p0/572	F01_cb740_c11/f1p0/572	F01_cb740_c11/f1p0/572	NA	NA
F01_cb16438_c23369/f1p0/1897	NA	F01_cb16438_c23369/f1p0/1897	NA	F01_cb16438_c23369/f1p0/1897
F01_cb16438_c36434/f1p0/1955	NA	F01_cb16438_c36434/f1p0/1955	NA	NA
F01_cb16438_c46392/f1p0/1616	F01_cb16438_c46392/f1p0/1616	F01_cb16438_c46392/f1p0/1616	NA	NA
F02_cb12681_c5/f1p1/1544	NA	F02_cb12681_c5/f1p1/1544	NA	NA
F01_cb8318_c2/f3p0/2280	NA	F01_cb8318_c2/f3p0/2280	F01_cb8318_c2/f3p0/2280	F01_cb8318_c2/f3p0/2280
F02_cb17156_c5/f1p0/732	F02_cb17156_c5/f1p0/732	F02_cb17156_c5/f1p0/732	F02_cb17156_c5/f1p0/732	F02_cb17156_c5/f1p0/732
F01_cb21688_c206/f1p0/567	F01_cb21688_c206/f1p0/567	F01_cb21688_c206/f1p0/567	F01_cb21688_c206/f1p0/567	F01_cb21688_c206/f1p0/567
F02_cb8713_c8/f1p0/2176	NA	F02_cb8713_c8/f1p0/2176	NA	NA
F02_cb5432_c16/f1p0/1910	NA	F02_cb5432_c16/f1p0/1910	NA	NA
F01_cb17899_c7/f1p0/490	F01_cb17899_c7/f1p0/490	F01_cb17899_c7/f1p0/490	F01_cb17899_c7/f1p0/490	F01_cb17899_c7/f1p0/490
F02_cb5702_c5/f1p0/1982	NA	NA	NA	F02_cb5702_c5/f1p0/1982
F02_cb14491_c1/f1p0/3534	NA	NA	NA	F02_cb14491_c1/f1p0/3534
F02_cb10986_c22/f1p0/1622	F02_cb10986_c22/f1p0/1622	F02_cb10986_c22/f1p0/1622	F02_cb10986_c22/f1p0/1622	F02_cb10986_c22/f1p0/1622
F02_cb11041_c44733/f1p0/2142	NA	NA	NA	F02_cb11041_c44733/f1p0/2142
F01_cb16031_c12/f1p0/604	F01_cb16031_c12/f1p0/604	F01_cb16031_c12/f1p0/604	NA	NA
F02_cb2887_c6/f1p0/2965	NA	NA	NA	F02_cb2887_c6/f1p0/2965
F02_cb13471_c3/f1p0/803	NA	F02_cb13471_c3/f1p0/803	F02_cb13471_c3/f1p0/803	F02_cb13471_c3/f1p0/803
F01_cb16438_c2622/f1p0/2431	NA	F01_cb16438_c2622/f1p0/2431	NA	NA
F02_cb6712_c2/f1p0/2461	NA	NA	NA	F02_cb6712_c2/f1p0/2461
F02_cb916_c16/f1p0/504	NA	NA	NA	F02_cb916_c16/f1p0/504
F01_cb7337_c1/f1p0/2407	NA	F01_cb7337_c1/f1p0/2407	NA	F01_cb7337_c1/f1p0/2407
F01_cb1104_c15/f1p1/2362	NA	NA	NA	F01_cb1104_c15/f1p1/2362
F01_cb16438_c2663/f1p0/2580	F01_cb16438_c2663/f1p0/2580	F01_cb16438_c2663/f1p0/2580	F01_cb16438_c2663/f1p0/2580	F01_cb16438_c2663/f1p0/2580
F02_cb11085_c10/f1p0/1176	NA	NA	NA	F02_cb11085_c10/f1p0/1176
F02_cb14187_c1/f1p0/2814	NA	F02_cb14187_c1/f1p0/2814	F02_cb14187_c1/f1p0/2814	F02_cb14187_c1/f1p0/2814
F01_cb4574_c3/f1p0/2029	F01_cb4574_c3/f1p0/2029	F01_cb4574_c3/f1p0/2029	NA	F01_cb4574_c3/f1p0/2029
F01_cb14891_c11/f3p0/903	NA	NA	NA	F01_cb14891_c11/f3p0/903
F02_cb5820_c1/f1p0/2560	NA	NA	NA	F02_cb5820_c1/f1p0/2560
F02_cb11041_c82704/f1p0/3090	NA	F02_cb11041_c82704/f1p0/3090	NA	F02_cb11041_c82704/f1p0/3090
F01_cb20672_c0/f1p0/817	NA	F01_cb20672_c0/f1p0/817	F01_cb20672_c0/f1p0/817	F01_cb20672_c0/f1p0/817
F01_cb5464_c2/f1p0/1739	NA	NA	F01_cb5464_c2/f1p0/1739	F01_cb5464_c2/f1p0/1739
F01_cb16438_c24116/f1p0/1812	NA	F01_cb16438_c24116/f1p0/1812	F01_cb16438_c24116/f1p0/1812	F01_cb16438_c24116/f1p0/1812
F01_cb13246_c2/f3p1/771	NA	F01_cb13246_c2/f3p1/771	NA	NA
F02_cb18426_c0/f11p0/666	NA	F02_cb18426_c0/f11p0/666	NA	NA
F01_cb3647_c11/f1p0/2875	NA	NA	NA	F01_cb3647_c11/f1p0/2875
F02_cb15774_c9/f1p0/635	NA	NA	F02_cb15774_c9/f1p0/635	F02_cb15774_c9/f1p0/635
F02_cb14424_c0/f1p0/920	NA	NA	NA	F02_cb14424_c0/f1p0/920
F01_cb16438_c45159/f1p0/1937	NA	F01_cb16438_c45159/f1p0/1937	NA	NA
F02_cb10109_c2/f1p0/1982	NA	NA	NA	F02_cb10109_c2/f1p0/1982
F01_cb10331_c19/f1p0/1785	F01_cb10331_c19/f1p0/1785	F01_cb10331_c19/f1p0/1785	NA	NA
F02_cb16257_c9/f1p2/1024	NA	NA	NA	F02_cb16257_c9/f1p2/1024
F01_cb3063_c13/f1p0/1677	F01_cb3063_c13/f1p0/1677	F01_cb3063_c13/f1p0/1677	NA	NA
F01_cb20072_c2/f1p0/1208	NA	F01_cb20072_c2/f1p0/1208	NA	NA
F01_cb6820_c4/f1p1/2257	NA	NA	NA	F01_cb6820_c4/f1p1/2257
F01_cb1194_c1/f1p0/2617	NA	NA	NA	F01_cb1194_c1/f1p0/2617
F01_cb9011_c23/f1p0/2714	NA	NA	NA	F01_cb9011_c23/f1p0/2714
F01_cb111_c9/f1p0/2078	NA	NA	NA	F01_cb111_c9/f1p0/2078
F02_cb16600_c5/f2p0/683	NA	NA	NA	F02_cb16600_c5/f2p0/683
F01_cb13341_c5/f1p0/440	F01_cb13341_c5/f1p0/440	F01_cb13341_c5/f1p0/440	F01_cb13341_c5/f1p0/440	F01_cb13341_c5/f1p0/440
F01_cb16438_c1715/f1p0/1968	NA	F01_cb16438_c1715/f1p0/1968	NA	NA
F02_cb18313_c0/f2p0/1031	NA	NA	NA	F02_cb18313_c0/f2p0/1031
F02_cb11041_c1248/f1p0/2727	NA	F02_cb11041_c1248/f1p0/2727	F02_cb11041_c1248/f1p0/2727	F02_cb11041_c1248/f1p0/2727
F02_cb19355_c0/f2p0/581	NA	F02_cb19355_c0/f2p0/581	NA	NA
F01_cb16438_c2086/f1p0/2109	NA	NA	NA	F01_cb16438_c2086/f1p0/2109
F02_cb4783_c7/f2p0/2714	NA	NA	NA	F02_cb4783_c7/f2p0/2714
F01_cb4313_c59/f1p1/2888	NA	F01_cb4313_c59/f1p1/2888	NA	NA
F02_cb4440_c7/f1p0/2622	NA	NA	NA	F02_cb4440_c7/f1p0/2622
F01_cb17432_c2/f1p0/1215	F01_cb17432_c2/f1p0/1215	F01_cb17432_c2/f1p0/1215	NA	NA
F01_cb18087_c4/f2p4/661	NA	F01_cb18087_c4/f2p4/661	NA	NA
F01_cb16056_c3/f1p0/651	NA	F01_cb16056_c3/f1p0/651	NA	NA
F01_cb19301_c0/f4p0/491	F01_cb19301_c0/f4p0/491	F01_cb19301_c0/f4p0/491	NA	F01_cb19301_c0/f4p0/491
F02_cb13752_c0/f2p0/1300	NA	NA	NA	F02_cb13752_c0/f2p0/1300
F02_cb5923_c4/f1p0/2568	NA	F02_cb5923_c4/f1p0/2568	NA	NA
F01_cb16620_c0/f3p0/760	NA	NA	NA	F01_cb16620_c0/f3p0/760
F01_cb19796_c3/f1p0/934	NA	NA	NA	F01_cb19796_c3/f1p0/934
[truncated: 34,358 more rows]
