# Supplementary material for: SMRT sequencing of full-length transcriptome and gene expression analysis in two chemical types of Pogostemon cablin (Blanco) Benth
Source: PeerJ. 2022 Feb 22;10:e12940. doi: 10.7717/peerj.12940 (PMC8877398; doi:10.7717/peerj.12940)
Supplement: Supplemental Information 5 [file peerj-10-12940-s005.xlsx]

## Sheet: TF_classification
File S6 TF calssification
#ID	Family	Type
F01_cb13399_c0/f1p0/1199-1F	Alfin-like	TF
F01_cb13399_c1/f1p0/1886-2F	Alfin-like	TF
F01_cb13399_c2/f1p0/1273-2F	Alfin-like	TF
F01_cb13399_c3/f1p0/1167-0F	Alfin-like	TF
F01_cb20079_c0/f2p0/1098-2F	Alfin-like	TF
F01_cb20079_c1/f1p0/1105-2F	Alfin-like	TF
F01_cb20079_c2/f1p0/1176-2F	Alfin-like	TF
F01_cb20109_c0/f4p0/1168-1F	Alfin-like	TF
F01_cb20109_c1/f2p0/1177-2F	Alfin-like	TF
F01_cb20109_c4/f1p0/1171-2F	Alfin-like	TF
F01_cb20109_c7/f1p0/1216-2F	Alfin-like	TF
F01_cb21316_c1/f1p0/974-0F	Alfin-like	TF
F01_cb4951_c0/f1p1/2849-2F	Alfin-like	TF
F01_cb4951_c1/f1p1/2768-0F	Alfin-like	TF
F01_cb4951_c2/f1p0/1496-2F	Alfin-like	TF
F01_cb8141_c0/f5p2/1361-2F	Alfin-like	TF
F01_cb8141_c1/f2p1/2350-1F	Alfin-like	TF
F01_cb8141_c4/f1p1/1339-1F	Alfin-like	TF
F02_cb1545_c18/f1p0/3160-0F	Alfin-like	TF
F02_cb15732_c0/f5p0/1141-0F	Alfin-like	TF
F02_cb15732_c1/f3p1/1152-0F	Alfin-like	TF
F02_cb16824_c2/f1p0/730-1F	Alfin-like	TF
F02_cb16824_c5/f5p0/1061-0F	Alfin-like	TF
F02_cb18294_c0/f2p0/1013-0F	Alfin-like	TF
F02_cb18294_c1/f1p0/1108-1F	Alfin-like	TF
F02_cb4747_c2/f1p0/2794-0F	Alfin-like	TF
F02_cb4747_c3/f1p0/1417-2F	Alfin-like	TF
F02_cb6589_c1/f1p0/2481-0F	Alfin-like	TF
F02_cb6589_c2/f1p0/2339-2F	Alfin-like	TF
F02_cb6589_c3/f1p0/2245-1F	Alfin-like	TF
F02_cb6589_c5/f1p0/1219-0F	Alfin-like	TF
F02_cb6589_c8/f11p1/1359-0F	Alfin-like	TF
F01_cb10279_c0/f2p0/1545-0F	AP2/ERF-AP2	TF
F01_cb10279_c4/f1p0/1638-0F	AP2/ERF-AP2	TF
F01_cb16438_c1966/f1p0/2274-0F	AP2/ERF-AP2	TF
F01_cb16438_c1968/f1p0/1945-2F	AP2/ERF-AP2	TF
F01_cb16438_c1972/f1p0/2308-1F	AP2/ERF-AP2	TF
F01_cb16438_c1975/f3p0/2678-0F	AP2/ERF-AP2	TF
F01_cb16438_c1982/f2p1/2590-2F	AP2/ERF-AP2	TF
F01_cb19496_c274/f1p0/1450-2F	AP2/ERF-AP2	TF
F01_cb19496_c590/f1p0/1143-2F	AP2/ERF-AP2	TF
F01_cb8863_c14/f1p0/2322-0F	AP2/ERF-AP2	TF
F01_cb8863_c19/f1p0/2465-2F	AP2/ERF-AP2	TF
F01_cb8863_c21/f3p0/2215-0F	AP2/ERF-AP2	TF
F02_cb10485_c0/f1p0/1933-2F	AP2/ERF-AP2	TF
F02_cb10485_c1/f1p0/1656-1F	AP2/ERF-AP2	TF
F02_cb10485_c2/f1p0/1861-0F	AP2/ERF-AP2	TF
F02_cb10485_c3/f1p0/1801-2F	AP2/ERF-AP2	TF
F02_cb10485_c4/f1p0/1629-1F	AP2/ERF-AP2	TF
F02_cb11041_c104626/f4p1/2630-2F	AP2/ERF-AP2	TF
F02_cb11041_c74077/f5p1/2610-1F	AP2/ERF-AP2	TF
F02_cb11041_c77484/f1p0/2476-1F	AP2/ERF-AP2	TF
F02_cb14414_c3/f1p0/1229-1F	AP2/ERF-AP2	TF
F02_cb19397_c0/f2p0/1244-1F	AP2/ERF-AP2	TF
F02_cb7902_c0/f3p0/2330-1F	AP2/ERF-AP2	TF
F02_cb7902_c1/f2p0/2221-2F	AP2/ERF-AP2	TF
F02_cb7902_c5/f1p0/2162-2F	AP2/ERF-AP2	TF
F02_cb7902_c7/f1p0/2064-2F	AP2/ERF-AP2	TF
F02_cb8186_c0/f1p0/2260-1F	AP2/ERF-AP2	TF
F01_cb10227_c0/f2p0/1855-2F	AP2/ERF-ERF	TF
F01_cb10227_c1/f1p0/2044-2F	AP2/ERF-ERF	TF
F01_cb10227_c2/f1p0/2193-1F	AP2/ERF-ERF	TF
F01_cb10227_c4/f1p0/2191-2F	AP2/ERF-ERF	TF
F01_cb10227_c7/f1p0/1824-2F	AP2/ERF-ERF	TF
F01_cb10279_c1/f1p0/2030-1F	AP2/ERF-ERF	TF
F01_cb10279_c2/f1p0/1722-0F	AP2/ERF-ERF	TF
F01_cb10279_c3/f1p0/2207-2F	AP2/ERF-ERF	TF
F01_cb10279_c5/f1p0/1860-2F	AP2/ERF-ERF	TF
F01_cb10279_c6/f1p0/1594-1F	AP2/ERF-ERF	TF
F01_cb1049_c0/f1p0/3961-2F	AP2/ERF-ERF	TF
F01_cb1049_c2/f1p0/3722-0F	AP2/ERF-ERF	TF
F01_cb1049_c3/f1p0/4048-2F	AP2/ERF-ERF	TF
F01_cb10864_c1/f1p0/1951-0F	AP2/ERF-ERF	TF
F01_cb10864_c3/f1p0/1937-0F	AP2/ERF-ERF	TF
F01_cb10864_c4/f1p0/1857-2F	AP2/ERF-ERF	TF
F01_cb10864_c6/f1p0/1865-0F	AP2/ERF-ERF	TF
F01_cb10977_c0/f2p0/1894-0F	AP2/ERF-ERF	TF
F01_cb11397_c0/f2p1/1849-2F	AP2/ERF-ERF	TF
F01_cb11397_c1/f2p1/1871-0F	AP2/ERF-ERF	TF
F01_cb11397_c2/f1p0/1789-2F	AP2/ERF-ERF	TF
F01_cb11584_c10/f1p0/1609-1F	AP2/ERF-ERF	TF
F01_cb11584_c12/f1p1/1702-2F	AP2/ERF-ERF	TF
F01_cb11584_c13/f1p1/1597-0F	AP2/ERF-ERF	TF
F01_cb11584_c14/f1p0/1569-1F	AP2/ERF-ERF	TF
F01_cb11584_c15/f3p0/1482-0F	AP2/ERF-ERF	TF
F01_cb11584_c16/f1p0/1429-0F	AP2/ERF-ERF	TF
F01_cb11584_c17/f1p0/1186-1F	AP2/ERF-ERF	TF
F01_cb11584_c4/f2p1/1684-1F	AP2/ERF-ERF	TF
F01_cb11584_c5/f2p0/1851-1F	AP2/ERF-ERF	TF
F01_cb11584_c7/f1p0/1853-1F	AP2/ERF-ERF	TF
F01_cb11584_c9/f1p2/1600-0F	AP2/ERF-ERF	TF
F01_cb1183_c5/f1p0/2432-0F	AP2/ERF-ERF	TF
F01_cb1183_c6/f1p0/2627-1F	AP2/ERF-ERF	TF
F01_cb1183_c7/f1p0/2542-2F	AP2/ERF-ERF	TF
F01_cb1183_c8/f1p0/1841-0R	AP2/ERF-ERF	TF
F01_cb1183_c8/f1p0/1841-2F	AP2/ERF-ERF	TF
F01_cb12235_c1/f1p0/3252-2F	AP2/ERF-ERF	TF
F01_cb12235_c2/f1p0/1630-2F	AP2/ERF-ERF	TF
F01_cb12804_c2/f1p2/1599-1F	AP2/ERF-ERF	TF
F01_cb12804_c3/f3p2/1656-0F	AP2/ERF-ERF	TF
F01_cb13152_c11/f1p0/1036-1F	AP2/ERF-ERF	TF
F01_cb13581_c2/f1p1/982-0F	AP2/ERF-ERF	TF
F01_cb13581_c5/f1p0/979-0F	AP2/ERF-ERF	TF
F01_cb13959_c0/f1p0/1587-2F	AP2/ERF-ERF	TF
F01_cb13959_c1/f1p0/2040-0F	AP2/ERF-ERF	TF
F01_cb14165_c0/f4p0/1179-2F	AP2/ERF-ERF	TF
F01_cb14165_c2/f1p0/1129-1F	AP2/ERF-ERF	TF
F01_cb14481_c0/f1p0/969-0F	AP2/ERF-ERF	TF
F01_cb14520_c0/f1p0/1585-0F	AP2/ERF-ERF	TF
F01_cb14520_c0/f1p0/1585-1F	AP2/ERF-ERF	TF
F01_cb14660_c0/f1p0/1531-0F	AP2/ERF-ERF	TF
F01_cb14660_c1/f1p0/1752-0F	AP2/ERF-ERF	TF
F01_cb15445_c1/f4p0/1227-1F	AP2/ERF-ERF	TF
F01_cb15445_c10/f1p0/1000-0F	AP2/ERF-ERF	TF
F01_cb15445_c14/f6p1/1363-2F	AP2/ERF-ERF	TF
F01_cb15445_c4/f4p0/1257-2F	AP2/ERF-ERF	TF
F01_cb15445_c6/f3p0/1332-0F	AP2/ERF-ERF	TF
F01_cb15445_c7/f2p0/1105-0F	AP2/ERF-ERF	TF
F01_cb15445_c8/f1p0/963-2F	AP2/ERF-ERF	TF
F01_cb15458_c1/f2p0/1149-2F	AP2/ERF-ERF	TF
F01_cb15458_c2/f1p0/1061-0F	AP2/ERF-ERF	TF
F01_cb15458_c5/f2p0/1108-0F	AP2/ERF-ERF	TF
F01_cb15458_c6/f1p0/1116-2F	AP2/ERF-ERF	TF
F01_cb15458_c7/f2p0/1068-0F	AP2/ERF-ERF	TF
F01_cb15507_c3/f2p0/780-1F	AP2/ERF-ERF	TF
F01_cb15507_c4/f6p0/877-1F	AP2/ERF-ERF	TF
F01_cb15507_c5/f2p0/779-2F	AP2/ERF-ERF	TF
F01_cb15693_c11/f1p0/1403-0F	AP2/ERF-ERF	TF
F01_cb15693_c21/f1p1/1376-0F	AP2/ERF-ERF	TF
F01_cb15693_c24/f33p3/1385-1F	AP2/ERF-ERF	TF
F01_cb15711_c0/f1p0/804-2F	AP2/ERF-ERF	TF
F01_cb15711_c1/f1p0/1520-1F	AP2/ERF-ERF	TF
F01_cb15711_c2/f1p0/958-0F	AP2/ERF-ERF	TF
F01_cb15863_c3/f1p0/738-0F	AP2/ERF-ERF	TF
F01_cb15863_c6/f1p0/853-1F	AP2/ERF-ERF	TF
F01_cb15863_c8/f1p3/1444-0F	AP2/ERF-ERF	TF
F01_cb16409_c1/f9p1/1203-0F	AP2/ERF-ERF	TF
F01_cb16409_c23/f1p0/1307-0F	AP2/ERF-ERF	TF
F01_cb16409_c8/f1p0/779-1F	AP2/ERF-ERF	TF
F01_cb16438_c1965/f1p0/2758-2F	AP2/ERF-ERF	TF
F01_cb16438_c1973/f1p0/2141-1F	AP2/ERF-ERF	TF
F01_cb16438_c2724/f1p0/1615-1F	AP2/ERF-ERF	TF
F01_cb16438_c38642/f1p0/1605-0F	AP2/ERF-ERF	TF
F01_cb16448_c11/f1p0/1165-1F	AP2/ERF-ERF	TF
F01_cb16448_c12/f1p1/1140-2F	AP2/ERF-ERF	TF
F01_cb16448_c13/f1p0/1162-1F	AP2/ERF-ERF	TF
F01_cb16448_c2/f4p2/1045-2F	AP2/ERF-ERF	TF
F01_cb16448_c3/f2p1/787-2F	AP2/ERF-ERF	TF
F01_cb16448_c4/f1p2/1023-2F	AP2/ERF-ERF	TF
F01_cb16448_c5/f1p3/1084-2F	AP2/ERF-ERF	TF
F01_cb16448_c8/f1p0/1027-1F	AP2/ERF-ERF	TF
F01_cb16585_c0/f2p0/940-1F	AP2/ERF-ERF	TF
F01_cb16585_c1/f1p0/1058-2F	AP2/ERF-ERF	TF
F01_cb16585_c3/f1p0/1076-0F	AP2/ERF-ERF	TF
F01_cb16585_c5/f1p0/1092-2F	AP2/ERF-ERF	TF
F01_cb16994_c0/f1p0/678-2F	AP2/ERF-ERF	TF
F01_cb16994_c1/f1p0/449-1F	AP2/ERF-ERF	TF
F01_cb17069_c2/f3p1/790-1F	AP2/ERF-ERF	TF
F01_cb17069_c3/f2p1/829-2F	AP2/ERF-ERF	TF
F01_cb17069_c5/f2p1/1052-2F	AP2/ERF-ERF	TF
F01_cb17425_c4/f1p0/1257-0F	AP2/ERF-ERF	TF
F01_cb17425_c5/f1p0/1493-0F	AP2/ERF-ERF	TF
F01_cb17679_c0/f2p0/1433-2F	AP2/ERF-ERF	TF
F01_cb17679_c1/f1p0/1347-0F	AP2/ERF-ERF	TF
F01_cb17767_c0/f6p0/774-2F	AP2/ERF-ERF	TF
F01_cb17809_c0/f2p0/963-1F	AP2/ERF-ERF	TF
F01_cb17809_c1/f2p0/929-1F	AP2/ERF-ERF	TF
F01_cb17809_c10/f1p0/922-1F	AP2/ERF-ERF	TF
F01_cb17809_c2/f1p0/1047-1F	AP2/ERF-ERF	TF
F01_cb17809_c3/f1p0/930-0F	AP2/ERF-ERF	TF
F01_cb17809_c6/f1p0/934-0F	AP2/ERF-ERF	TF
F01_cb17809_c7/f1p0/1167-0F	AP2/ERF-ERF	TF
F01_cb17809_c9/f1p0/909-2F	AP2/ERF-ERF	TF
F01_cb18063_c3/f2p0/1141-1F	AP2/ERF-ERF	TF
F01_cb18436_c1/f1p0/1176-1F	AP2/ERF-ERF	TF
F01_cb18681_c0/f2p0/925-2F	AP2/ERF-ERF	TF
F01_cb18846_c0/f2p0/798-0R	AP2/ERF-ERF	TF
F01_cb18846_c1/f2p0/783-0R	AP2/ERF-ERF	TF
F01_cb19339_c0/f1p0/1150-1F	AP2/ERF-ERF	TF
F01_cb19339_c1/f1p1/1170-1F	AP2/ERF-ERF	TF
F01_cb19339_c6/f1p0/1197-1F	AP2/ERF-ERF	TF
F01_cb19339_c7/f1p1/1096-1F	AP2/ERF-ERF	TF
F01_cb19633_c5/f1p0/900-1F	AP2/ERF-ERF	TF
F01_cb19633_c6/f2p0/1048-2F	AP2/ERF-ERF	TF
F01_cb19641_c1/f1p0/885-1F	AP2/ERF-ERF	TF
F01_cb19714_c10/f1p0/993-0F	AP2/ERF-ERF	TF
F01_cb19714_c12/f5p0/940-2F	AP2/ERF-ERF	TF
F01_cb19714_c5/f1p0/1021-2F	AP2/ERF-ERF	TF
F01_cb19714_c6/f1p0/967-2F	AP2/ERF-ERF	TF
F01_cb19714_c8/f1p1/1036-2F	AP2/ERF-ERF	TF
F01_cb19714_c9/f1p0/990-0F	AP2/ERF-ERF	TF
F01_cb19714_c9/f1p0/990-1R	AP2/ERF-ERF	TF
F01_cb20021_c0/f1p0/1110-2F	AP2/ERF-ERF	TF
F01_cb20021_c1/f1p0/1146-1F	AP2/ERF-ERF	TF
F01_cb20028_c0/f1p0/1472-1F	AP2/ERF-ERF	TF
F01_cb20028_c2/f1p0/818-1F	AP2/ERF-ERF	TF
F01_cb20105_c10/f3p0/1275-2F	AP2/ERF-ERF	TF
F01_cb20105_c11/f1p1/1228-0F	AP2/ERF-ERF	TF
F01_cb20105_c3/f2p0/1187-0F	AP2/ERF-ERF	TF
F01_cb20105_c5/f1p1/1341-0F	AP2/ERF-ERF	TF
F01_cb20105_c7/f1p0/1093-1F	AP2/ERF-ERF	TF
F01_cb20132_c0/f1p0/703-1F	AP2/ERF-ERF	TF
F01_cb20138_c0/f3p1/1185-2F	AP2/ERF-ERF	TF
F01_cb20138_c2/f2p0/1167-0F	AP2/ERF-ERF	TF
F01_cb20138_c3/f2p0/1256-0F	AP2/ERF-ERF	TF
F01_cb20334_c0/f1p0/1089-1F	AP2/ERF-ERF	TF
F01_cb20388_c0/f2p0/804-0F	AP2/ERF-ERF	TF
F01_cb20388_c1/f2p0/769-1F	AP2/ERF-ERF	TF
F01_cb20388_c2/f1p0/819-1F	AP2/ERF-ERF	TF
F01_cb20415_c0/f2p0/596-0F	AP2/ERF-ERF	TF
F01_cb20498_c0/f3p0/884-1F	AP2/ERF-ERF	TF
F01_cb21020_c1/f1p0/1138-1F	AP2/ERF-ERF	TF
F01_cb21143_c0/f3p0/1104-2F	AP2/ERF-ERF	TF
F01_cb21538_c0/f1p0/1330-0F	AP2/ERF-ERF	TF
F01_cb21538_c1/f1p0/1376-2F	AP2/ERF-ERF	TF
F01_cb21575_c0/f1p0/1074-2F	AP2/ERF-ERF	TF
F01_cb21652_c1/f1p0/969-1F	AP2/ERF-ERF	TF
F01_cb21657_c0/f1p0/1331-0F	AP2/ERF-ERF	TF
F01_cb21757_c1/f1p0/1002-1F	AP2/ERF-ERF	TF
F01_cb21757_c2/f1p0/830-0F	AP2/ERF-ERF	TF
F01_cb22030_c0/f2p0/1333-1F	AP2/ERF-ERF	TF
F01_cb22156_c1/f1p0/779-1F	AP2/ERF-ERF	TF
F01_cb4004_c42/f1p1/2014-1F	AP2/ERF-ERF	TF
F01_cb4895_c10/f1p0/2509-0F	AP2/ERF-ERF	TF
F01_cb4895_c11/f1p2/2804-2F	AP2/ERF-ERF	TF
F01_cb4895_c12/f1p1/2552-1F	AP2/ERF-ERF	TF
F01_cb4895_c13/f1p1/2522-2F	AP2/ERF-ERF	TF
F01_cb4895_c15/f1p0/1328-2F	AP2/ERF-ERF	TF
F01_cb4895_c21/f1p1/1162-0F	AP2/ERF-ERF	TF
F01_cb4895_c3/f3p1/1276-0F	AP2/ERF-ERF	TF
F01_cb5546_c0/f1p0/2746-0F	AP2/ERF-ERF	TF
F01_cb5546_c1/f1p0/2141-0F	AP2/ERF-ERF	TF
F01_cb5546_c4/f1p0/2161-1F	AP2/ERF-ERF	TF
F01_cb7196_c5/f1p0/2471-1R	AP2/ERF-ERF	TF
F01_cb7196_c7/f1p0/1929-0R	AP2/ERF-ERF	TF
F01_cb8494_c10/f1p1/2111-2F	AP2/ERF-ERF	TF
F01_cb8494_c11/f1p5/1944-0F	AP2/ERF-ERF	TF
F01_cb8494_c14/f2p5/1897-2F	AP2/ERF-ERF	TF
F01_cb8494_c15/f1p3/1985-1F	AP2/ERF-ERF	TF
F01_cb8494_c18/f1p0/2006-1F	AP2/ERF-ERF	TF
F01_cb8494_c23/f91p5/1882-2F	AP2/ERF-ERF	TF
F01_cb8494_c6/f2p0/1140-0F	AP2/ERF-ERF	TF
F01_cb8494_c9/f1p0/2233-2F	AP2/ERF-ERF	TF
F01_cb8863_c4/f1p0/2232-2F	AP2/ERF-ERF	TF
F01_cb8863_c8/f1p1/2158-2F	AP2/ERF-ERF	TF
F01_cb8863_c9/f1p0/2040-0F	AP2/ERF-ERF	TF
F01_cb9676_c12/f1p1/1834-2F	AP2/ERF-ERF	TF
F01_cb9676_c14/f1p0/2017-0F	AP2/ERF-ERF	TF
F01_cb9676_c18/f10p2/1916-0F	AP2/ERF-ERF	TF
F01_cb9676_c8/f1p0/2022-2F	AP2/ERF-ERF	TF
F01_cb9676_c9/f1p0/1755-1F	AP2/ERF-ERF	TF
F01_cb9797_c1/f1p0/2076-1F	AP2/ERF-ERF	TF
F01_cb9858_c1/f2p0/1968-1F	AP2/ERF-ERF	TF
F01_cb9862_c11/f2p0/2654-0F	AP2/ERF-ERF	TF
F01_cb9862_c14/f1p0/2095-2F	AP2/ERF-ERF	TF
F01_cb9862_c15/f1p0/2114-1F	AP2/ERF-ERF	TF
F01_cb9862_c19/f1p0/3154-2F	AP2/ERF-ERF	TF
F01_cb9862_c20/f1p0/1861-1F	AP2/ERF-ERF	TF
F01_cb9862_c23/f1p2/2058-2F	AP2/ERF-ERF	TF
F01_cb9862_c24/f1p0/2778-1F	AP2/ERF-ERF	TF
F01_cb9862_c25/f1p1/2470-0F	AP2/ERF-ERF	TF
F01_cb9862_c27/f1p0/2457-1F	AP2/ERF-ERF	TF
F01_cb9862_c31/f1p0/1783-2F	AP2/ERF-ERF	TF
F01_cb9862_c38/f1p0/1945-0F	AP2/ERF-ERF	TF
F01_cb9862_c39/f1p0/1871-2F	AP2/ERF-ERF	TF
F01_cb9862_c42/f9p2/2004-2F	AP2/ERF-ERF	TF
F01_cb9862_c6/f3p1/2110-1F	AP2/ERF-ERF	TF
F01_cb9862_c8/f2p0/1981-0F	AP2/ERF-ERF	TF
F01_cb9900_c0/f4p0/1498-2F	AP2/ERF-ERF	TF
F01_cb9900_c11/f1p0/1946-2F	AP2/ERF-ERF	TF
F01_cb9900_c12/f2p0/1363-1F	AP2/ERF-ERF	TF
F01_cb9900_c2/f4p0/864-2F	AP2/ERF-ERF	TF
F01_cb9900_c4/f3p0/2084-0F	AP2/ERF-ERF	TF
F01_cb9900_c6/f2p0/1342-1F	AP2/ERF-ERF	TF
F01_cb9900_c8/f1p0/1833-1F	AP2/ERF-ERF	TF
F02_cb10005_c10/f1p0/1440-1F	AP2/ERF-ERF	TF
F02_cb10005_c3/f8p1/1909-2F	AP2/ERF-ERF	TF
F02_cb10005_c7/f1p0/2024-1F	AP2/ERF-ERF	TF
F02_cb10005_c8/f1p0/1946-0F	AP2/ERF-ERF	TF
F02_cb10040_c1/f2p0/2008-1F	AP2/ERF-ERF	TF
F02_cb10040_c2/f1p0/1963-0F	AP2/ERF-ERF	TF
F02_cb10040_c3/f1p0/1084-2F	AP2/ERF-ERF	TF
F02_cb10263_c0/f2p0/1850-1F	AP2/ERF-ERF	TF
F02_cb10263_c1/f1p0/1969-1F	AP2/ERF-ERF	TF
F02_cb10263_c2/f1p0/1855-1F	AP2/ERF-ERF	TF
F02_cb11041_c103577/f1p3/1962-0F	AP2/ERF-ERF	TF
F02_cb11041_c104561/f45p2/1870-0F	AP2/ERF-ERF	TF
F02_cb11041_c132044/f7p1/1764-1F	AP2/ERF-ERF	TF
F02_cb11041_c15463/f1p1/3611-1F	AP2/ERF-ERF	TF
F02_cb11041_c59015/f4p3/1955-2F	AP2/ERF-ERF	TF
F02_cb11041_c74837/f1p0/1498-0F	AP2/ERF-ERF	TF
F02_cb11041_c74837/f1p0/1498-1F	AP2/ERF-ERF	TF
F02_cb11041_c78459/f1p3/1922-2F	AP2/ERF-ERF	TF
F02_cb11041_c83798/f1p0/2039-0R	AP2/ERF-ERF	TF
F02_cb11041_c88365/f1p0/2010-0F	AP2/ERF-ERF	TF
F02_cb11041_c88365/f1p0/2010-2F	AP2/ERF-ERF	TF
F02_cb12913_c12/f1p0/1443-0F	AP2/ERF-ERF	TF
F02_cb12967_c1/f1p0/1518-2F	AP2/ERF-ERF	TF
F02_cb13135_c0/f3p0/1345-2F	AP2/ERF-ERF	TF
F02_cb13135_c1/f3p0/1460-0F	AP2/ERF-ERF	TF
F02_cb13175_c0/f1p0/1458-2F	AP2/ERF-ERF	TF
F02_cb13175_c1/f1p0/1591-0F	AP2/ERF-ERF	TF
F02_cb13453_c0/f6p0/1361-1F	AP2/ERF-ERF	TF
F02_cb13453_c5/f1p0/1377-0F	AP2/ERF-ERF	TF
F02_cb13453_c7/f1p0/1189-0F	AP2/ERF-ERF	TF
F02_cb13619_c0/f2p0/1233-1F	AP2/ERF-ERF	TF
F02_cb13619_c1/f2p0/1328-2F	AP2/ERF-ERF	TF
F02_cb13619_c2/f1p0/1348-1F	AP2/ERF-ERF	TF
F02_cb14082_c0/f1p0/950-0F	AP2/ERF-ERF	TF
F02_cb14082_c1/f1p0/1949-0F	AP2/ERF-ERF	TF
F02_cb14414_c2/f1p0/1209-2F	AP2/ERF-ERF	TF
F02_cb14865_c1/f1p0/1306-0F	AP2/ERF-ERF	TF
F02_cb15275_c1/f1p0/869-1F	AP2/ERF-ERF	TF
F02_cb16703_c1/f1p0/1182-0F	AP2/ERF-ERF	TF
F02_cb16703_c4/f1p0/1283-0F	AP2/ERF-ERF	TF
F02_cb16705_c0/f3p0/831-0F	AP2/ERF-ERF	TF
F02_cb16705_c3/f1p0/865-1F	AP2/ERF-ERF	TF
F02_cb16712_c1/f1p0/1050-2F	AP2/ERF-ERF	TF
F02_cb16713_c100/f2p1/966-2F	AP2/ERF-ERF	TF
F02_cb16713_c113/f2p0/1201-2F	AP2/ERF-ERF	TF
F02_cb16839_c12/f1p1/953-0F	AP2/ERF-ERF	TF
F02_cb16839_c2/f5p1/1032-0F	AP2/ERF-ERF	TF
F02_cb16839_c3/f1p1/799-1F	AP2/ERF-ERF	TF
F02_cb16839_c6/f1p0/990-1F	AP2/ERF-ERF	TF
F02_cb16839_c9/f7p1/943-1F	AP2/ERF-ERF	TF
F02_cb16894_c0/f1p0/956-2F	AP2/ERF-ERF	TF
F02_cb16894_c1/f1p0/1229-2F	AP2/ERF-ERF	TF
F02_cb17024_c0/f4p0/979-2F	AP2/ERF-ERF	TF
F02_cb17411_c1/f1p0/1200-0F	AP2/ERF-ERF	TF
F02_cb17411_c4/f1p1/1318-0F	AP2/ERF-ERF	TF
F02_cb17757_c0/f5p0/768-0F	AP2/ERF-ERF	TF
F02_cb17757_c1/f1p0/777-1F	AP2/ERF-ERF	TF
F02_cb17827_c2/f1p0/715-1F	AP2/ERF-ERF	TF
F02_cb1782_c0/f1p0/3647-0F	AP2/ERF-ERF	TF
F02_cb1782_c5/f1p0/3503-2F	AP2/ERF-ERF	TF
F02_cb17868_c0/f3p0/552-0F	AP2/ERF-ERF	TF
F02_cb17868_c1/f1p0/617-1F	AP2/ERF-ERF	TF
F02_cb17868_c2/f1p0/567-0F	AP2/ERF-ERF	TF
F02_cb17925_c0/f3p0/986-0F	AP2/ERF-ERF	TF
F02_cb18020_c0/f2p0/820-1F	AP2/ERF-ERF	TF
F02_cb18026_c2/f1p0/625-1F	AP2/ERF-ERF	TF
F02_cb18199_c1/f1p0/1133-0F	AP2/ERF-ERF	TF
F02_cb18199_c3/f1p0/1067-1F	AP2/ERF-ERF	TF
F02_cb18234_c0/f2p0/633-2F	AP2/ERF-ERF	TF
F02_cb18620_c1/f1p0/922-0F	AP2/ERF-ERF	TF
F02_cb18620_c2/f1p0/1238-2F	AP2/ERF-ERF	TF
F02_cb18942_c1/f1p0/798-0R	AP2/ERF-ERF	TF
F02_cb18942_c2/f1p0/801-2R	AP2/ERF-ERF	TF
F02_cb19140_c0/f1p0/957-2F	AP2/ERF-ERF	TF
F02_cb19140_c1/f1p0/977-1F	AP2/ERF-ERF	TF
F02_cb19315_c0/f1p0/1112-1F	AP2/ERF-ERF	TF
F02_cb19315_c1/f1p0/973-2F	AP2/ERF-ERF	TF
F02_cb19490_c0/f2p0/1054-1F	AP2/ERF-ERF	TF
F02_cb5885_c5/f1p1/1698-0F	AP2/ERF-ERF	TF
F02_cb6188_c0/f6p1/1264-2F	AP2/ERF-ERF	TF
F02_cb6188_c12/f1p1/1286-0F	AP2/ERF-ERF	TF
F02_cb6188_c13/f1p1/1231-0F	AP2/ERF-ERF	TF
F02_cb6188_c17/f1p0/1076-1F	AP2/ERF-ERF	TF
F02_cb6188_c4/f2p0/1187-2F	AP2/ERF-ERF	TF
F02_cb6188_c5/f2p1/2497-0F	AP2/ERF-ERF	TF
F02_cb6188_c6/f1p1/2574-2F	AP2/ERF-ERF	TF
F02_cb6188_c9/f1p1/1316-2F	AP2/ERF-ERF	TF
F02_cb6510_c2/f1p1/2517-2F	AP2/ERF-ERF	TF
F02_cb6510_c3/f1p0/1891-2F	AP2/ERF-ERF	TF
F02_cb7489_c0/f2p0/2300-1F	AP2/ERF-ERF	TF
F02_cb7489_c1/f1p0/2361-2F	AP2/ERF-ERF	TF
F02_cb7489_c3/f1p0/2331-0F	AP2/ERF-ERF	TF
F02_cb7489_c5/f1p0/2347-0F	AP2/ERF-ERF	TF
F02_cb7489_c6/f1p0/2059-0F	AP2/ERF-ERF	TF
F02_cb7902_c13/f1p0/2158-2F	AP2/ERF-ERF	TF
F02_cb7902_c2/f1p0/2301-1F	AP2/ERF-ERF	TF
F02_cb7902_c2/f1p0/2301-2F	AP2/ERF-ERF	TF
F02_cb7902_c9/f1p0/2321-2F	AP2/ERF-ERF	TF
F02_cb8186_c1/f1p0/2091-0F	AP2/ERF-ERF	TF
F02_cb8186_c1/f1p0/2091-2F	AP2/ERF-ERF	TF
F02_cb8225_c10/f2p0/2005-0F	AP2/ERF-ERF	TF
F02_cb8225_c15/f1p0/2095-2F	AP2/ERF-ERF	TF
F02_cb8225_c2/f1p1/1772-0F	AP2/ERF-ERF	TF
F02_cb8443_c0/f1p0/2219-2F	AP2/ERF-ERF	TF
F02_cb8443_c1/f1p0/2196-0F	AP2/ERF-ERF	TF
F02_cb8443_c2/f1p0/1526-2F	AP2/ERF-ERF	TF
F02_cb8928_c10/f1p0/1032-0F	AP2/ERF-ERF	TF
F02_cb8928_c15/f10p1/1269-1F	AP2/ERF-ERF	TF
F02_cb8928_c3/f2p0/1308-1F	AP2/ERF-ERF	TF
F02_cb8928_c5/f1p0/1310-0F	AP2/ERF-ERF	TF
F02_cb8928_c7/f1p1/1261-0F	AP2/ERF-ERF	TF
F02_cb9185_c1/f1p0/2116-2R	AP2/ERF-ERF	TF
F02_cb9185_c2/f1p0/1401-0R	AP2/ERF-ERF	TF
F02_cb9455_c0/f2p0/1865-1F	AP2/ERF-ERF	TF
F02_cb9455_c2/f1p0/1798-0F	AP2/ERF-ERF	TF
F02_cb9953_c1/f4p0/1594-2F	AP2/ERF-ERF	TF
F02_cb9953_c2/f1p0/2012-2F	AP2/ERF-ERF	TF
F02_cb9953_c3/f1p0/1706-2F	AP2/ERF-ERF	TF
F02_cb9953_c4/f1p0/1588-2F	AP2/ERF-ERF	TF
F02_cb9953_c7/f1p0/1758-2F	AP2/ERF-ERF	TF
F02_cb9953_c8/f1p0/1753-2F	AP2/ERF-ERF	TF
F01_cb13152_c1/f4p2/1405-0F	AP2/ERF-RAV	TF
F01_cb13152_c10/f1p0/1375-2F	AP2/ERF-RAV	TF
F01_cb13152_c12/f1p1/1510-1F	AP2/ERF-RAV	TF
F01_cb13152_c13/f1p1/1407-2F	AP2/ERF-RAV	TF
F01_cb13152_c7/f1p0/1586-2F	AP2/ERF-RAV	TF
F01_cb13152_c8/f1p1/1496-1F	AP2/ERF-RAV	TF
F01_cb15693_c12/f1p2/1418-2F	AP2/ERF-RAV	TF
F01_cb15693_c13/f1p0/1461-2F	AP2/ERF-RAV	TF
F01_cb15693_c14/f1p0/1568-0F	AP2/ERF-RAV	TF
F01_cb15693_c16/f1p0/1437-2F	AP2/ERF-RAV	TF
F01_cb15693_c17/f1p2/1433-2F	AP2/ERF-RAV	TF
F01_cb15693_c7/f1p0/1402-2F	AP2/ERF-RAV	TF
F01_cb15693_c8/f1p3/1585-2F	AP2/ERF-RAV	TF
F01_cb15693_c9/f1p0/1393-1F	AP2/ERF-RAV	TF
F01_cb20996_c0/f2p1/1529-0F	AP2/ERF-RAV	TF
F01_cb20996_c1/f2p0/1502-0F	AP2/ERF-RAV	TF
F01_cb7237_c0/f1p0/2460-0F	AP2/ERF-RAV	TF
F01_cb7237_c1/f1p0/1611-0F	AP2/ERF-RAV	TF
F02_cb12913_c13/f1p0/1785-0F	AP2/ERF-RAV	TF
F02_cb12913_c14/f1p0/1449-1F	AP2/ERF-RAV	TF
F02_cb12913_c30/f1p0/1512-2F	AP2/ERF-RAV	TF
F02_cb12913_c6/f1p0/1376-2F	AP2/ERF-RAV	TF
F02_cb13186_c0/f1p1/1455-2F	AP2/ERF-RAV	TF
F01_cb10226_c0/f6p2/1931-2F	ARID	TR
F01_cb10226_c10/f1p1/1797-2F	ARID	TR
F01_cb10226_c12/f1p0/1966-1F	ARID	TR
F01_cb10226_c13/f1p0/1902-1F	ARID	TR
F01_cb10226_c18/f4p0/1871-2F	ARID	TR
F01_cb10226_c3/f3p0/1984-2F	ARID	TR
F01_cb10226_c4/f2p0/1930-0F	ARID	TR
F01_cb10226_c5/f1p0/2037-1F	ARID	TR
F01_cb10226_c8/f1p1/1641-0F	ARID	TR
F01_cb16438_c33842/f1p0/3162-2F	ARID	TR
F01_cb16438_c36654/f1p0/3088-1F	ARID	TR
F01_cb16438_c41656/f3p0/3198-1F	ARID	TR
F01_cb20067_c0/f1p0/1185-1F	ARID	TR
F01_cb20167_c0/f2p0/1342-1F	ARID	TR
F01_cb20167_c2/f1p0/1192-1F	ARID	TR
F01_cb3352_c10/f1p0/3225-2F	ARID	TR
F01_cb3352_c11/f1p1/3181-0F	ARID	TR
F01_cb3352_c12/f1p0/3362-0F	ARID	TR
F01_cb3352_c14/f1p0/3225-1F	ARID	TR
F01_cb3352_c16/f1p0/2956-1F	ARID	TR
F01_cb3352_c4/f1p0/3207-2F	ARID	TR
F01_cb3352_c7/f1p0/3567-1F	ARID	TR
F01_cb3352_c8/f1p0/3242-1F	ARID	TR
F01_cb4381_c24/f1p0/3250-2F	ARID	TR
F01_cb4381_c26/f1p0/3517-0F	ARID	TR
F01_cb4381_c27/f1p0/2004-0F	ARID	TR
F01_cb4381_c28/f1p0/2502-2F	ARID	TR
F01_cb4381_c30/f1p0/2430-1F	ARID	TR
F01_cb4381_c32/f2p0/2467-2F	ARID	TR
F01_cb4381_c35/f1p0/2590-1F	ARID	TR
F01_cb4381_c36/f1p0/2471-2F	ARID	TR
F01_cb4381_c38/f1p0/1984-2F	ARID	TR
F01_cb4381_c41/f1p0/2660-1F	ARID	TR
F01_cb4381_c42/f1p0/3062-0F	ARID	TR
F01_cb4381_c44/f1p0/2521-1F	ARID	TR
F01_cb4381_c45/f1p0/2819-0F	ARID	TR
F01_cb4381_c47/f1p0/2551-0F	ARID	TR
F01_cb4381_c48/f1p0/2636-0F	ARID	TR
F01_cb4381_c49/f1p0/2553-0F	ARID	TR
F01_cb4381_c5/f5p0/2524-1F	ARID	TR
F01_cb4381_c55/f1p0/2547-0F	ARID	TR
F01_cb4381_c59/f1p0/2402-1F	ARID	TR
F01_cb6024_c2/f1p0/2312-2F	ARID	TR
F01_cb6024_c3/f1p0/2207-0F	ARID	TR
F02_cb10002_c19/f1p0/3158-1F	ARID	TR
F02_cb10002_c2/f2p0/3300-1F	ARID	TR
F02_cb10002_c21/f1p0/3422-0F	ARID	TR
F02_cb10002_c24/f1p0/3013-0F	ARID	TR
F02_cb11041_c4001/f1p0/3269-1F	ARID	TR
F02_cb11041_c4002/f1p0/3172-2F	ARID	TR
F02_cb11041_c4028/f1p0/3233-2F	ARID	TR
F02_cb13593_c0/f1p0/1354-1F	ARID	TR
F02_cb13593_c1/f1p0/1319-1F	ARID	TR
F02_cb14750_c0/f1p0/1258-1F	ARID	TR
F02_cb14750_c2/f1p0/1152-1F	ARID	TR
F02_cb2757_c6/f1p0/5672-1F	ARID	TR
F02_cb5537_c10/f1p0/2484-2F	ARID	TR
F02_cb5537_c11/f1p0/2414-0F	ARID	TR
F02_cb5537_c16/f1p0/2272-2F	ARID	TR
F02_cb5537_c20/f1p0/2673-2F	ARID	TR
F02_cb5537_c21/f1p0/2322-2F	ARID	TR
F02_cb5537_c23/f3p0/2456-1F	ARID	TR
F02_cb5537_c3/f4p0/2549-2F	ARID	TR
F02_cb5537_c4/f2p1/2648-1F	ARID	TR
F02_cb5537_c7/f1p1/3394-1F	ARID	TR
F02_cb5537_c8/f1p0/2798-2F	ARID	TR
F02_cb6890_c0/f1p0/2396-1F	ARID	TR
F02_cb6890_c1/f1p0/2433-0F	ARID	TR
F02_cb6890_c2/f1p0/2359-2F	ARID	TR
F01_cb4834_c5/f1p0/2095-2F	Aur	PK
F01_cb11666_c1/f1p0/1839-1F	AUX/IAA	TR
F01_cb11666_c3/f1p0/1401-0F	AUX/IAA	TR
F01_cb11666_c4/f1p0/1185-0F	AUX/IAA	TR
F01_cb11666_c4/f1p0/1185-1F	AUX/IAA	TR
F01_cb11666_c5/f1p0/746-0F	AUX/IAA	TR
F01_cb12220_c0/f1p0/1758-2F	AUX/IAA	TR
F01_cb12323_c4/f3p0/1739-1F	AUX/IAA	TR
F01_cb12967_c10/f1p0/1508-1F	AUX/IAA	TR
F01_cb12967_c14/f1p0/1367-2F	AUX/IAA	TR
F01_cb12967_c15/f1p0/1350-0F	AUX/IAA	TR
F01_cb12967_c17/f1p0/1170-0F	AUX/IAA	TR
F01_cb12967_c22/f2p0/1329-2F	AUX/IAA	TR
F01_cb12967_c6/f1p0/1579-1F	AUX/IAA	TR
F01_cb12967_c7/f1p0/2094-0F	AUX/IAA	TR
F01_cb12967_c8/f1p0/1511-1F	AUX/IAA	TR
F01_cb14587_c0/f1p0/1580-2F	AUX/IAA	TR
F01_cb15244_c0/f2p0/1268-2F	AUX/IAA	TR
F01_cb15244_c2/f1p0/1225-1F	AUX/IAA	TR
F01_cb15244_c3/f1p0/1344-0F	AUX/IAA	TR
F01_cb15244_c3/f1p0/1344-1F	AUX/IAA	TR
F01_cb15244_c4/f1p0/1153-0F	AUX/IAA	TR
F01_cb15244_c5/f1p0/953-2F	AUX/IAA	TR
F01_cb15244_c6/f1p0/1195-1F	AUX/IAA	TR
F01_cb15395_c15/f1p0/401-0F	AUX/IAA	TR
F01_cb15395_c19/f1p0/1179-2F	AUX/IAA	TR
F01_cb15395_c21/f1p0/848-0F	AUX/IAA	TR
F01_cb15395_c22/f1p1/1086-0F	AUX/IAA	TR
F01_cb15395_c23/f10p0/1090-0F	AUX/IAA	TR
F01_cb15395_c25/f9p0/1052-1F	AUX/IAA	TR
F01_cb15395_c3/f3p0/1128-0F	AUX/IAA	TR
F01_cb15395_c4/f1p1/1101-2F	AUX/IAA	TR
F01_cb15395_c8/f1p0/502-0F	AUX/IAA	TR
F01_cb15395_c9/f1p0/1232-2F	AUX/IAA	TR
F01_cb15847_c4/f1p0/1082-2F	AUX/IAA	TR
F01_cb15847_c7/f1p0/1026-1F	AUX/IAA	TR
F01_cb15847_c9/f1p0/899-2F	AUX/IAA	TR
F01_cb16438_c33620/f1p0/3078-2F	AUX/IAA	TR
F01_cb16438_c35563/f1p0/2788-0F	AUX/IAA	TR
F01_cb16438_c36717/f2p0/2780-0F	AUX/IAA	TR
F01_cb16438_c37194/f1p0/2817-0F	AUX/IAA	TR
F01_cb16438_c41397/f1p1/2602-0F	AUX/IAA	TR
F01_cb16438_c44085/f1p0/3777-0F	AUX/IAA	TR
F01_cb16438_c44111/f1p0/2733-2F	AUX/IAA	TR
F01_cb16438_c45680/f1p0/2461-1F	AUX/IAA	TR
F01_cb16438_c46002/f1p0/2555-0F	AUX/IAA	TR
F01_cb16438_c55349/f3p2/2775-1F	AUX/IAA	TR
F01_cb16438_c55389/f2p0/2653-1F	AUX/IAA	TR
F01_cb16438_c56919/f2p1/2848-1F	AUX/IAA	TR
F01_cb16842_c1/f3p2/1079-1F	AUX/IAA	TR
F01_cb16842_c10/f1p0/1165-0F	AUX/IAA	TR
F01_cb16842_c10/f1p0/1165-2F	AUX/IAA	TR
F01_cb16842_c11/f1p0/1154-2F	AUX/IAA	TR
F01_cb16842_c12/f1p0/561-1F	AUX/IAA	TR
F01_cb16842_c17/f30p2/1063-1F	AUX/IAA	TR
F01_cb16842_c3/f3p3/1062-2F	AUX/IAA	TR
F01_cb16842_c5/f1p0/1249-0F	AUX/IAA	TR
F01_cb16842_c5/f1p0/1249-1F	AUX/IAA	TR
F01_cb16842_c6/f1p0/1016-1F	AUX/IAA	TR
F01_cb16842_c7/f1p0/967-1F	AUX/IAA	TR
F01_cb16842_c9/f1p0/1198-1F	AUX/IAA	TR
F01_cb17664_c0/f1p0/1099-2F	AUX/IAA	TR
F01_cb17664_c2/f1p0/931-2F	AUX/IAA	TR
F01_cb17664_c3/f1p0/1047-1F	AUX/IAA	TR
F01_cb18181_c1/f1p0/1471-0F	AUX/IAA	TR
F01_cb18181_c1/f1p0/1471-1F	AUX/IAA	TR
F01_cb18181_c1/f1p0/1471-2F	AUX/IAA	TR
F01_cb19682_c1771/f1p0/1573-0F	AUX/IAA	TR
F01_cb19682_c540/f1p0/597-0F	AUX/IAA	TR
F01_cb19682_c541/f2p0/1384-0F	AUX/IAA	TR
F01_cb19682_c579/f1p0/1303-2F	AUX/IAA	TR
F01_cb21051_c0/f2p0/1336-1F	AUX/IAA	TR
F01_cb2172_c14/f1p0/2283-0F	AUX/IAA	TR
F01_cb2172_c15/f1p0/1863-1F	AUX/IAA	TR
F01_cb2172_c16/f1p0/1879-1F	AUX/IAA	TR
F01_cb2172_c21/f1p0/3304-2F	AUX/IAA	TR
F01_cb2172_c22/f1p0/3235-2F	AUX/IAA	TR
F01_cb2172_c27/f1p0/3098-0F	AUX/IAA	TR
F01_cb2172_c45/f1p0/2221-1F	AUX/IAA	TR
F01_cb2631_c1/f8p0/2649-2F	AUX/IAA	TR
F01_cb2631_c15/f1p0/3112-2F	AUX/IAA	TR
F01_cb2631_c20/f1p0/2588-1F	AUX/IAA	TR
F01_cb2631_c3/f3p0/2564-2F	AUX/IAA	TR
F01_cb298_c25/f1p0/3113-1F	AUX/IAA	TR
F01_cb298_c31/f1p0/3475-2F	AUX/IAA	TR
F01_cb298_c37/f1p0/3233-0F	AUX/IAA	TR
F01_cb298_c51/f1p1/3195-2F	AUX/IAA	TR
F01_cb298_c53/f1p4/3310-1F	AUX/IAA	TR
F01_cb298_c56/f1p0/3152-2F	AUX/IAA	TR
F01_cb298_c74/f1p1/2858-2F	AUX/IAA	TR
F01_cb298_c82/f1p0/3345-0F	AUX/IAA	TR
F01_cb298_c83/f1p0/2968-1F	AUX/IAA	TR
F01_cb298_c85/f1p0/2127-0F	AUX/IAA	TR
F01_cb298_c96/f1p0/1703-0F	AUX/IAA	TR
F01_cb298_c96/f1p0/1703-2R	AUX/IAA	TR
F01_cb3297_c13/f1p0/3224-2F	AUX/IAA	TR
F01_cb3297_c16/f1p0/3522-1F	AUX/IAA	TR
F01_cb3297_c17/f1p0/2603-0F	AUX/IAA	TR
F01_cb3297_c18/f1p0/2607-0F	AUX/IAA	TR
F01_cb3297_c20/f1p0/2744-0F	AUX/IAA	TR
F01_cb3297_c27/f1p0/3115-1F	AUX/IAA	TR
F01_cb3297_c3/f3p0/2818-2F	AUX/IAA	TR
F01_cb3297_c30/f1p0/2783-1F	AUX/IAA	TR
F01_cb3297_c31/f1p0/2693-2F	AUX/IAA	TR
F01_cb3297_c35/f1p0/2890-2F	AUX/IAA	TR
F01_cb3297_c39/f1p0/2682-1F	AUX/IAA	TR
F01_cb3297_c49/f1p0/2757-1F	AUX/IAA	TR
F01_cb598_c3/f1p1/2373-1F	AUX/IAA	TR
F01_cb598_c9/f1p1/4442-1F	AUX/IAA	TR
F01_cb8968_c1/f1p0/1907-0F	AUX/IAA	TR
F01_cb8968_c1/f1p0/1907-1F	AUX/IAA	TR
F01_cb8968_c1/f1p0/1907-2F	AUX/IAA	TR
F01_cb8968_c2/f1p0/1318-1F	AUX/IAA	TR
F01_cb941_c2/f3p0/3359-0F	AUX/IAA	TR
F01_cb941_c7/f1p5/3468-0F	AUX/IAA	TR
F01_cb98_c10/f1p0/4273-1F	AUX/IAA	TR
F01_cb98_c24/f1p0/1948-0F	AUX/IAA	TR
F01_cb98_c29/f1p0/4592-1F	AUX/IAA	TR
F01_cb98_c32/f1p0/4565-1F	AUX/IAA	TR
F01_cb98_c43/f1p2/4600-1F	AUX/IAA	TR
F02_cb11041_c3648/f1p0/3117-1F	AUX/IAA	TR
F02_cb11041_c3657/f1p1/2369-0F	AUX/IAA	TR
F02_cb11041_c3667/f1p0/2362-1F	AUX/IAA	TR
F02_cb11041_c51798/f1p0/3299-2F	AUX/IAA	TR
F02_cb1189_c10/f1p0/2493-0F	AUX/IAA	TR
F02_cb1189_c36/f1p0/1942-1F	AUX/IAA	TR
F02_cb12445_c0/f1p0/1610-2F	AUX/IAA	TR
F02_cb12473_c0/f1p0/1600-0F	AUX/IAA	TR
F02_cb12473_c0/f1p0/1600-2F	AUX/IAA	TR
F02_cb12473_c1/f1p0/1487-1F	AUX/IAA	TR
F02_cb12626_c0/f1p0/1570-2F	AUX/IAA	TR
F02_cb12626_c2/f1p0/1321-0F	AUX/IAA	TR
F02_cb12750_c0/f2p0/1570-2F	AUX/IAA	TR
F02_cb1346_c21/f1p0/3184-1F	AUX/IAA	TR
F02_cb1346_c35/f1p1/2902-2F	AUX/IAA	TR
F02_cb1346_c39/f1p0/3423-1F	AUX/IAA	TR
F02_cb13785_c1/f1p1/1285-2F	AUX/IAA	TR
F02_cb14091_c0/f2p0/1239-2F	AUX/IAA	TR
F02_cb14091_c2/f1p0/873-2F	AUX/IAA	TR
F02_cb14137_c0/f6p0/1063-0F	AUX/IAA	TR
F02_cb14137_c3/f3p1/1104-2F	AUX/IAA	TR
F02_cb14137_c4/f1p0/1752-1F	AUX/IAA	TR
F02_cb14137_c4/f1p0/1752-1R	AUX/IAA	TR
F02_cb14137_c5/f1p0/1089-1F	AUX/IAA	TR
F02_cb14137_c9/f1p0/1144-1F	AUX/IAA	TR
F02_cb14623_c0/f1p0/923-1F	AUX/IAA	TR
F02_cb1581_c12/f1p0/2765-2F	AUX/IAA	TR
F02_cb1581_c20/f1p0/1656-2F	AUX/IAA	TR
F02_cb1581_c28/f1p0/1942-2F	AUX/IAA	TR
F02_cb15849_c10/f1p0/674-2F	AUX/IAA	TR
F02_cb15849_c14/f6p0/970-1F	AUX/IAA	TR
F02_cb15849_c6/f1p0/1026-0F	AUX/IAA	TR
F02_cb15849_c8/f1p0/516-1F	AUX/IAA	TR
F02_cb15884_c2/f6p3/1095-2F	AUX/IAA	TR
F02_cb15884_c4/f1p0/802-2F	AUX/IAA	TR
F02_cb15884_c5/f1p0/1172-0F	AUX/IAA	TR
F02_cb15884_c5/f1p0/1172-2F	AUX/IAA	TR
F02_cb15978_c6/f1p1/1112-0F	AUX/IAA	TR
F02_cb15978_c7/f1p0/1168-0F	AUX/IAA	TR
F02_cb15978_c7/f1p0/1168-0R	AUX/IAA	TR
F02_cb16803_c0/f2p0/765-0F	AUX/IAA	TR
F02_cb16803_c1/f1p0/917-1F	AUX/IAA	TR
F02_cb16803_c1/f1p0/917-2F	AUX/IAA	TR
F02_cb16803_c3/f1p0/997-0F	AUX/IAA	TR
F02_cb16803_c4/f1p0/1133-1F	AUX/IAA	TR
F02_cb17204_c2/f1p0/1100-2F	AUX/IAA	TR
F02_cb19444_c0/f1p0/926-0F	AUX/IAA	TR
F02_cb2005_c3/f1p0/2942-2F	AUX/IAA	TR
F02_cb239_c4/f1p0/4110-0F	AUX/IAA	TR
F02_cb252_c37/f1p1/3259-0F	AUX/IAA	TR
F02_cb3059_c18/f1p0/3435-2F	AUX/IAA	TR
F02_cb3059_c28/f1p0/3469-2F	AUX/IAA	TR
F02_cb3703_c0/f1p0/3064-0F	AUX/IAA	TR
F02_cb3929_c2/f1p0/2587-0F	AUX/IAA	TR
F02_cb4866_c13/f1p0/2683-0F	AUX/IAA	TR
F02_cb4866_c21/f1p0/2483-1F	AUX/IAA	TR
F02_cb5962_c10/f2p0/1591-0F	AUX/IAA	TR
F02_cb5962_c10/f2p0/1591-2F	AUX/IAA	TR
F02_cb5962_c11/f2p0/1596-1F	AUX/IAA	TR
F02_cb5962_c15/f1p0/2448-0F	AUX/IAA	TR
F02_cb5962_c15/f1p0/2448-1F	AUX/IAA	TR
F02_cb5962_c16/f1p0/2407-0F	AUX/IAA	TR
F02_cb5962_c17/f1p1/1690-1F	AUX/IAA	TR
F02_cb5962_c19/f1p1/1589-0F	AUX/IAA	TR
F02_cb5962_c22/f2p1/1607-1F	AUX/IAA	TR
F02_cb5962_c24/f1p0/1925-0F	AUX/IAA	TR
F02_cb5962_c30/f1p0/2319-1F	AUX/IAA	TR
F02_cb5962_c30/f1p0/2319-2F	AUX/IAA	TR
F02_cb5962_c31/f1p1/1666-1F	AUX/IAA	TR
F02_cb5962_c32/f1p0/1740-2F	AUX/IAA	TR
F02_cb5962_c37/f1p1/1749-1F	AUX/IAA	TR
F02_cb5962_c37/f1p1/1749-2F	AUX/IAA	TR
F02_cb5962_c39/f1p0/1655-1F	AUX/IAA	TR
F02_cb5962_c40/f1p0/2290-0F	AUX/IAA	TR
F02_cb5962_c40/f1p0/2290-2F	AUX/IAA	TR
F02_cb5962_c41/f1p0/2148-0F	AUX/IAA	TR
F02_cb5962_c45/f1p0/1032-0F	AUX/IAA	TR
F02_cb5962_c46/f1p0/1044-0F	AUX/IAA	TR
F02_cb5962_c52/f1p1/1597-0F	AUX/IAA	TR
F02_cb5962_c6/f5p1/1609-1F	AUX/IAA	TR
F02_cb5962_c7/f5p0/2408-1F	AUX/IAA	TR
F02_cb7118_c14/f1p0/2619-0F	AUX/IAA	TR
F02_cb7118_c17/f1p0/2604-2F	AUX/IAA	TR
F02_cb7118_c29/f1p1/2781-2F	AUX/IAA	TR
F02_cb7118_c31/f1p0/2404-0F	AUX/IAA	TR
F02_cb7118_c31/f1p0/2404-2R	AUX/IAA	TR
F02_cb7118_c4/f3p0/2678-1F	AUX/IAA	TR
F02_cb7118_c40/f1p0/2971-2R	AUX/IAA	TR
F02_cb7118_c9/f1p0/2423-0F	AUX/IAA	TR
F02_cb7301_c1/f3p1/1426-1F	AUX/IAA	TR
F02_cb7301_c11/f1p0/1466-0F	AUX/IAA	TR
F02_cb7301_c11/f1p0/1466-1F	AUX/IAA	TR
F02_cb7301_c12/f1p0/1571-0F	AUX/IAA	TR
F02_cb7301_c14/f1p0/1446-1F	AUX/IAA	TR
F02_cb7301_c18/f1p0/1201-2F	AUX/IAA	TR
F02_cb7301_c2/f3p0/1451-0F	AUX/IAA	TR
F02_cb7301_c4/f1p0/2345-1F	AUX/IAA	TR
F02_cb7301_c4/f1p0/2345-2F	AUX/IAA	TR
F02_cb7301_c5/f1p1/1632-2F	AUX/IAA	TR
F02_cb7301_c6/f1p0/1393-2F	AUX/IAA	TR
F02_cb7301_c7/f1p1/1593-2F	AUX/IAA	TR
F02_cb7301_c9/f1p0/1521-1F	AUX/IAA	TR
F02_cb8771_c1/f1p0/1642-0F	AUX/IAA	TR
F02_cb8771_c1/f1p0/1642-2F	AUX/IAA	TR
F02_cb8771_c4/f1p0/1391-1F	AUX/IAA	TR
F02_cb8771_c5/f1p0/1265-1F	AUX/IAA	TR
F02_cb8771_c6/f1p0/1261-1F	AUX/IAA	TR
F02_cb9826_c0/f1p0/2028-1F	AUX/IAA	TR
F02_cb9826_c0/f1p0/2028-2F	AUX/IAA	TR
F02_cb9826_c1/f1p0/1330-2F	AUX/IAA	TR
F01_cb10114_c0/f2p0/1840-1F	B3	TF
F01_cb10114_c0/f2p0/1840-2F	B3	TF
F01_cb10114_c1/f1p0/2054-0F	B3	TF
F01_cb10114_c4/f1p0/1550-2F	B3	TF
F01_cb10748_c3/f1p1/1807-0F	B3	TF
F01_cb10748_c4/f1p0/1572-2F	B3	TF
F01_cb12349_c0/f1p0/1735-2F	B3	TF
F01_cb12349_c1/f1p0/1709-1F	B3	TF
F01_cb12349_c2/f1p0/1727-1F	B3	TF
F01_cb13152_c9/f1p0/968-0F	B3	TF
F01_cb1451_c2/f1p0/1645-2F	B3	TF
F01_cb1451_c3/f1p0/1698-2F	B3	TF
F01_cb1451_c4/f1p0/1644-0F	B3	TF
F01_cb1451_c5/f1p0/2720-2F	B3	TF
F01_cb1451_c7/f1p0/1861-2F	B3	TF
F01_cb1451_c9/f1p0/1516-1F	B3	TF
F01_cb15693_c11/f1p0/1403-2F	B3	TF
F01_cb15693_c21/f1p1/1376-1F	B3	TF
F01_cb15693_c24/f33p3/1385-0F	B3	TF
F01_cb16438_c35044/f1p0/3710-0F	B3	TF
F01_cb16438_c37194/f1p0/2817-2F	B3	TF
F01_cb16438_c55389/f2p0/2653-0F	B3	TF
F01_cb16438_c56919/f2p1/2848-0F	B3	TF
F01_cb20435_c132/f1p0/1446-1F	B3	TF
F01_cb20996_c2/f1p1/1571-2F	B3	TF
F01_cb2172_c10/f1p1/3046-2F	B3	TF
F01_cb2172_c19/f1p0/2795-1F	B3	TF
F01_cb2172_c20/f1p0/3009-0F	B3	TF
F01_cb2172_c22/f1p0/3235-1F	B3	TF
F01_cb2631_c9/f1p0/2588-0F	B3	TF
F01_cb2714_c1/f1p0/3122-0F	B3	TF
F01_cb2714_c2/f1p0/3233-2F	B3	TF
F01_cb2714_c3/f1p0/3246-0F	B3	TF
F01_cb2714_c6/f1p0/3120-0F	B3	TF
F01_cb2812_c0/f2p0/3189-2F	B3	TF
F01_cb2812_c12/f1p0/3197-1F	B3	TF
F01_cb2812_c13/f1p0/3123-1F	B3	TF
F01_cb2812_c19/f1p0/2996-1F	B3	TF
F01_cb2812_c6/f1p0/3591-0F	B3	TF
F01_cb2812_c7/f1p0/3544-2F	B3	TF
F01_cb2812_c8/f1p0/3997-0F	B3	TF
F01_cb2812_c8/f1p0/3997-0R	B3	TF
F01_cb298_c21/f1p0/3429-1F	B3	TF
F01_cb298_c26/f1p0/3585-1F	B3	TF
F01_cb298_c82/f1p0/3345-2F	B3	TF
F01_cb3064_c10/f1p0/2165-0F	B3	TF
F01_cb3064_c12/f1p0/2847-0F	B3	TF
F01_cb3064_c13/f1p1/3268-2F	B3	TF
F01_cb3064_c15/f1p0/3191-1F	B3	TF
F01_cb3064_c2/f1p0/2763-0F	B3	TF
F01_cb3064_c3/f1p0/3686-2F	B3	TF
F01_cb3064_c4/f1p0/2986-2F	B3	TF
F01_cb3064_c5/f1p1/3020-0F	B3	TF
F01_cb3064_c6/f1p0/2853-1F	B3	TF
F01_cb3064_c7/f1p0/2898-1F	B3	TF
F01_cb3064_c8/f1p0/3215-1F	B3	TF
F01_cb3064_c9/f1p0/3085-1F	B3	TF
F01_cb3297_c26/f1p0/2499-1F	B3	TF
F01_cb3297_c39/f1p0/2682-0F	B3	TF
F01_cb3391_c0/f2p1/3176-2F	B3	TF
F01_cb3492_c0/f1p0/3174-0R	B3	TF
F01_cb3492_c1/f1p0/3716-2R	B3	TF
F01_cb3581_c10/f1p0/1612-0F	B3	TF
F01_cb3581_c11/f1p0/1714-0F	B3	TF
F01_cb3581_c13/f1p0/1984-0F	B3	TF
F01_cb3581_c14/f1p0/1752-0F	B3	TF
F01_cb3581_c2/f1p1/3163-2F	B3	TF
F01_cb3581_c3/f1p1/3094-0F	B3	TF
F01_cb3581_c5/f1p0/3160-2F	B3	TF
F01_cb3581_c6/f1p1/3116-0F	B3	TF
F01_cb3581_c7/f1p0/1787-1F	B3	TF
F01_cb3581_c8/f1p0/1703-1F	B3	TF
F01_cb3581_c9/f2p0/1687-2F	B3	TF
F01_cb5513_c1/f1p0/2727-0R	B3	TF
F01_cb598_c8/f1p0/4486-1F	B3	TF
F01_cb6945_c2/f1p0/1717-0F	B3	TF
F01_cb7044_c10/f1p0/2151-2F	B3	TF
F01_cb7044_c11/f1p0/2218-0F	B3	TF
F01_cb7044_c11/f1p0/2218-1F	B3	TF
F01_cb7044_c2/f1p0/2495-0F	B3	TF
F01_cb7044_c3/f1p1/2330-0F	B3	TF
F01_cb7044_c3/f1p1/2330-1F	B3	TF
F01_cb7044_c6/f1p0/2169-1F	B3	TF
F01_cb7044_c6/f1p0/2169-2F	B3	TF
F01_cb7044_c7/f1p0/2279-2F	B3	TF
F01_cb7303_c0/f1p0/2454-0F	B3	TF
F01_cb7303_c2/f1p0/2371-0F	B3	TF
F01_cb7303_c3/f1p0/2332-2F	B3	TF
F01_cb7303_c4/f1p0/1578-2F	B3	TF
F01_cb7303_c5/f1p0/1388-2F	B3	TF
F01_cb8906_c1/f1p0/1900-2F	B3	TF
F01_cb8906_c2/f1p0/1828-0F	B3	TF
F01_cb8993_c0/f2p0/1955-0F	B3	TF
F01_cb8993_c1/f1p0/2198-0F	B3	TF
F01_cb8993_c3/f1p0/2064-2F	B3	TF
F01_cb8993_c7/f1p0/2125-0F	B3	TF
F01_cb941_c16/f1p1/3697-1F	B3	TF
F01_cb9668_c1/f1p0/2110-1F	B3	TF
F01_cb9668_c2/f1p0/2013-0F	B3	TF
F01_cb9668_c3/f1p0/2234-2F	B3	TF
F01_cb9668_c4/f1p0/2252-0F	B3	TF
F01_cb9668_c5/f1p0/1728-2F	B3	TF
F01_cb98_c30/f1p1/4603-0F	B3	TF
F01_cb98_c38/f1p1/4412-0F	B3	TF
F02_cb10469_c1/f1p0/1931-0F	B3	TF
F02_cb10469_c2/f1p0/2238-2F	B3	TF
F02_cb10469_c3/f1p0/1995-1F	B3	TF
F02_cb10469_c4/f1p0/1992-1F	B3	TF
F02_cb10526_c0/f1p0/1927-2F	B3	TF
F02_cb10526_c1/f1p0/1871-0F	B3	TF
F02_cb10526_c1/f1p0/1871-2F	B3	TF
F02_cb10668_c1/f1p0/2025-1F	B3	TF
F02_cb11014_c3/f1p0/1770-2F	B3	TF
F02_cb11041_c3650/f1p0/2572-2F	B3	TF
F02_cb11041_c3652/f1p0/2445-1F	B3	TF
F02_cb11041_c3655/f1p0/2450-0F	B3	TF
F02_cb11041_c3672/f1p0/2461-0F	B3	TF
F02_cb11041_c3674/f1p0/2611-0F	B3	TF
F02_cb11041_c40380/f2p0/3153-1F	B3	TF
F02_cb11041_c40556/f1p0/2651-0F	B3	TF
F02_cb11041_c734/f2p1/2554-1F	B3	TF
F02_cb11638_c4/f1p0/1725-1F	B3	TF
F02_cb1186_c4/f1p0/3497-0F	B3	TF
F02_cb12133_c2/f1p0/1947-0F	B3	TF
F02_cb12133_c3/f1p0/1647-1F	B3	TF
F02_cb12913_c12/f1p0/1443-1F	B3	TF
F02_cb1346_c47/f1p0/3295-2F	B3	TF
F02_cb13650_c0/f2p0/1330-2F	B3	TF
F02_cb15018_c0/f1p0/992-1F	B3	TF
F02_cb15018_c1/f1p0/2277-2F	B3	TF
F02_cb1581_c18/f1p0/3455-2F	B3	TF
F02_cb1581_c26/f1p1/3023-0F	B3	TF
F02_cb1581_c32/f1p1/2668-1F	B3	TF
F02_cb2216_c12/f1p0/2905-2F	B3	TF
F02_cb2216_c13/f1p0/2624-2F	B3	TF
F02_cb2216_c4/f1p0/2910-0F	B3	TF
F02_cb2216_c5/f1p0/2819-0F	B3	TF
F02_cb2216_c6/f1p0/3367-2F	B3	TF
F02_cb2216_c7/f1p0/2872-2F	B3	TF
F02_cb2216_c8/f1p0/3112-0F	B3	TF
F02_cb2216_c9/f1p0/2620-2F	B3	TF
F02_cb2512_c0/f2p1/3207-1F	B3	TF
F02_cb2512_c10/f1p1/3117-2F	B3	TF
F02_cb2512_c13/f1p0/3307-2F	B3	TF
F02_cb2512_c17/f1p0/3191-1F	B3	TF
F02_cb2512_c5/f1p0/2993-1F	B3	TF
F02_cb2512_c7/f1p1/3053-0F	B3	TF
F02_cb2512_c8/f1p1/3126-2F	B3	TF
F02_cb2512_c9/f1p0/2946-1F	B3	TF
F02_cb3059_c8/f1p0/3222-1F	B3	TF
F02_cb4569_c1/f1p0/2874-1F	B3	TF
F02_cb4866_c20/f1p0/2777-0F	B3	TF
F02_cb4866_c7/f2p0/2827-2F	B3	TF
F02_cb5380_c1/f1p0/1329-0F	B3	TF
F02_cb6393_c5/f3p0/2673-0F	B3	TF
F02_cb682_c0/f2p0/3070-1F	B3	TF
F02_cb682_c2/f1p2/2953-1F	B3	TF
F02_cb682_c3/f1p0/2630-0F	B3	TF
F02_cb682_c4/f1p0/3156-2F	B3	TF
F02_cb682_c5/f1p0/2911-1F	B3	TF
F02_cb7092_c0/f1p0/2427-0F	B3	TF
F02_cb7118_c14/f1p0/2619-2F	B3	TF
F02_cb7118_c16/f1p0/2950-1F	B3	TF
F02_cb7118_c18/f1p0/2993-2F	B3	TF
F02_cb8036_c1/f1p0/2130-2F	B3	TF
F02_cb875_c63/f3p0/2180-0F	B3	TF
F02_cb875_c65/f1p0/4111-1F	B3	TF
F02_cb875_c71/f1p0/1791-1F	B3	TF
F02_cb875_c72/f1p0/2664-2F	B3	TF
F02_cb875_c73/f1p0/1624-0F	B3	TF
F02_cb875_c74/f1p0/2370-0F	B3	TF
F02_cb875_c75/f1p0/2532-1F	B3	TF
F02_cb875_c80/f1p0/2025-0F	B3	TF
F02_cb9114_c0/f2p0/1660-0F	B3	TF
F02_cb9114_c2/f1p0/2451-0F	B3	TF
F02_cb9284_c1/f1p0/1944-2F	B3	TF
F01_cb10188_c0/f2p0/1974-2F	B3-ARF	TF
F01_cb10188_c2/f1p0/2148-2F	B3-ARF	TF
F01_cb10188_c3/f1p0/2057-2F	B3-ARF	TF
F01_cb16438_c31807/f5p0/3386-1F	B3-ARF	TF
F01_cb16438_c33620/f1p0/3078-0F	B3-ARF	TF
F01_cb16438_c35563/f1p0/2788-1F	B3-ARF	TF
F01_cb16438_c36717/f2p0/2780-1F	B3-ARF	TF
F01_cb16438_c37686/f2p0/2764-1F	B3-ARF	TF
F01_cb16438_c39184/f1p0/2937-1F	B3-ARF	TF
F01_cb16438_c39904/f3p0/2865-2F	B3-ARF	TF
F01_cb16438_c40099/f1p0/2635-2F	B3-ARF	TF
F01_cb16438_c40994/f1p0/2954-1F	B3-ARF	TF
F01_cb16438_c41397/f1p1/2602-2F	B3-ARF	TF
F01_cb16438_c41450/f1p0/2400-1F	B3-ARF	TF
F01_cb16438_c44085/f1p0/3777-2F	B3-ARF	TF
F01_cb16438_c44111/f1p0/2733-0F	B3-ARF	TF
F01_cb16438_c45680/f1p0/2461-2F	B3-ARF	TF
F01_cb16438_c55349/f3p2/2775-2F	B3-ARF	TF
F01_cb2172_c11/f1p0/2973-2F	B3-ARF	TF
F01_cb2172_c13/f1p0/3110-0F	B3-ARF	TF
F01_cb2172_c2/f3p0/3484-0F	B3-ARF	TF
F01_cb2172_c21/f1p0/3304-1F	B3-ARF	TF
F01_cb2172_c27/f1p0/3098-2F	B3-ARF	TF
F01_cb2172_c28/f1p1/3914-1F	B3-ARF	TF
F01_cb2172_c31/f1p2/3790-0F	B3-ARF	TF
F01_cb2172_c33/f1p0/3533-0F	B3-ARF	TF
F01_cb2172_c39/f1p0/2968-2F	B3-ARF	TF
F01_cb2172_c41/f1p0/3330-1F	B3-ARF	TF
F01_cb2172_c44/f1p0/2762-1F	B3-ARF	TF
F01_cb2172_c49/f2p0/3441-2F	B3-ARF	TF
F01_cb2172_c8/f1p0/3775-1F	B3-ARF	TF
F01_cb2631_c1/f8p0/2649-0F	B3-ARF	TF
F01_cb2631_c10/f1p0/2582-0F	B3-ARF	TF
F01_cb2631_c11/f1p0/2583-1F	B3-ARF	TF
F01_cb2631_c12/f1p0/2671-1F	B3-ARF	TF
F01_cb2631_c14/f1p0/2469-2F	B3-ARF	TF
F01_cb2631_c15/f1p0/3112-1F	B3-ARF	TF
F01_cb2631_c18/f1p0/3007-0F	B3-ARF	TF
F01_cb2631_c20/f1p0/2588-2F	B3-ARF	TF
F01_cb2631_c25/f1p0/2543-0F	B3-ARF	TF
F01_cb2631_c27/f1p0/2511-0F	B3-ARF	TF
F01_cb2631_c3/f3p0/2564-1F	B3-ARF	TF
F01_cb2631_c34/f1p0/2538-0F	B3-ARF	TF
F01_cb2631_c4/f2p0/2686-0F	B3-ARF	TF
F01_cb2631_c5/f2p0/2763-1F	B3-ARF	TF
F01_cb2631_c6/f1p0/3407-0F	B3-ARF	TF
F01_cb2856_c2/f1p0/3324-0F	B3-ARF	TF
F01_cb2856_c4/f1p0/3809-1F	B3-ARF	TF
F01_cb2935_c0/f1p0/3311-2F	B3-ARF	TF
F01_cb2935_c1/f1p0/3183-2F	B3-ARF	TF
F01_cb2935_c3/f1p0/2633-2F	B3-ARF	TF
F01_cb298_c16/f2p0/3369-0F	B3-ARF	TF
F01_cb298_c22/f1p1/3356-2F	B3-ARF	TF
F01_cb298_c23/f1p1/3104-1F	B3-ARF	TF
F01_cb298_c25/f1p0/3113-0F	B3-ARF	TF
F01_cb298_c27/f1p2/3485-0F	B3-ARF	TF
F01_cb298_c30/f1p0/3370-1F	B3-ARF	TF
F01_cb298_c31/f1p0/3475-1F	B3-ARF	TF
F01_cb298_c33/f1p0/3101-2F	B3-ARF	TF
F01_cb298_c34/f1p0/3331-0F	B3-ARF	TF
F01_cb298_c37/f1p0/3233-2F	B3-ARF	TF
F01_cb298_c39/f1p0/3617-0F	B3-ARF	TF
F01_cb298_c43/f1p0/3273-2F	B3-ARF	TF
F01_cb298_c44/f1p1/3310-2F	B3-ARF	TF
F01_cb298_c51/f1p1/3195-0F	B3-ARF	TF
F01_cb298_c53/f1p4/3310-2F	B3-ARF	TF
F01_cb298_c60/f1p0/3065-0F	B3-ARF	TF
F01_cb298_c62/f1p1/3354-0F	B3-ARF	TF
F01_cb298_c64/f1p1/3392-0F	B3-ARF	TF
F01_cb298_c65/f1p0/3465-1F	B3-ARF	TF
F01_cb298_c7/f8p2/3280-0F	B3-ARF	TF
F01_cb298_c71/f1p0/3534-1F	B3-ARF	TF
F01_cb298_c74/f1p1/2858-0F	B3-ARF	TF
F01_cb298_c83/f1p0/2968-2F	B3-ARF	TF
F01_cb2994_c0/f1p0/3295-1F	B3-ARF	TF
F01_cb3297_c10/f2p0/2798-0F	B3-ARF	TF
F01_cb3297_c12/f2p0/2650-0F	B3-ARF	TF
F01_cb3297_c13/f1p0/3224-1F	B3-ARF	TF
F01_cb3297_c14/f1p0/2785-0F	B3-ARF	TF
F01_cb3297_c16/f1p0/3522-2F	B3-ARF	TF
F01_cb3297_c17/f1p0/2603-2F	B3-ARF	TF
F01_cb3297_c18/f1p0/2607-2F	B3-ARF	TF
F01_cb3297_c20/f1p0/2744-2F	B3-ARF	TF
F01_cb3297_c23/f1p0/2685-1F	B3-ARF	TF
F01_cb3297_c24/f1p0/2999-0F	B3-ARF	TF
F01_cb3297_c27/f1p0/3115-0F	B3-ARF	TF
F01_cb3297_c29/f1p0/2874-0F	B3-ARF	TF
F01_cb3297_c3/f3p0/2818-1F	B3-ARF	TF
F01_cb3297_c30/f1p0/2783-0F	B3-ARF	TF
F01_cb3297_c31/f1p0/2693-1F	B3-ARF	TF
F01_cb3297_c35/f1p0/2890-1F	B3-ARF	TF
F01_cb3297_c38/f1p0/2617-2F	B3-ARF	TF
F01_cb3297_c45/f1p0/2814-2F	B3-ARF	TF
F01_cb3297_c46/f1p0/2320-0F	B3-ARF	TF
F01_cb3297_c47/f1p0/2835-0F	B3-ARF	TF
F01_cb3297_c48/f1p0/2558-2F	B3-ARF	TF
F01_cb3297_c49/f1p0/2757-2F	B3-ARF	TF
F01_cb3297_c50/f1p0/2720-1F	B3-ARF	TF
F01_cb3297_c51/f1p0/2630-0F	B3-ARF	TF
F01_cb3297_c9/f2p0/2894-1F	B3-ARF	TF
F01_cb3876_c1/f1p0/3119-1F	B3-ARF	TF
F01_cb3903_c10/f1p0/2816-2F	B3-ARF	TF
F01_cb3903_c11/f1p0/2612-2F	B3-ARF	TF
F01_cb3903_c14/f1p0/3078-2F	B3-ARF	TF
F01_cb3903_c17/f1p0/2941-2F	B3-ARF	TF
F01_cb3903_c18/f1p0/2862-2F	B3-ARF	TF
F01_cb3903_c3/f2p0/2784-2F	B3-ARF	TF
F01_cb3903_c6/f1p0/2978-0F	B3-ARF	TF
F01_cb3903_c9/f1p0/3314-1F	B3-ARF	TF
F01_cb5439_c10/f1p0/2425-1F	B3-ARF	TF
F01_cb5439_c4/f1p1/2754-1F	B3-ARF	TF
F01_cb5439_c6/f1p0/2923-0F	B3-ARF	TF
F01_cb5439_c7/f1p0/2661-2F	B3-ARF	TF
F01_cb5439_c9/f1p0/2729-0F	B3-ARF	TF
F01_cb598_c4/f1p2/4190-0F	B3-ARF	TF
F01_cb598_c9/f1p1/4442-2F	B3-ARF	TF
F01_cb9300_c10/f1p1/3103-1F	B3-ARF	TF
F01_cb9300_c11/f1p0/3248-0F	B3-ARF	TF
F01_cb9300_c15/f1p0/3308-2F	B3-ARF	TF
F01_cb9300_c21/f2p0/3146-1F	B3-ARF	TF
F01_cb9300_c22/f1p0/3158-1F	B3-ARF	TF
F01_cb941_c1/f3p0/2702-2F	B3-ARF	TF
F01_cb941_c11/f1p0/3511-0F	B3-ARF	TF
F01_cb941_c13/f1p0/2987-0F	B3-ARF	TF
F01_cb941_c14/f1p0/2890-2F	B3-ARF	TF
F01_cb941_c15/f1p0/3909-1F	B3-ARF	TF
F01_cb941_c18/f1p0/3666-1F	B3-ARF	TF
F01_cb941_c19/f1p0/3407-1F	B3-ARF	TF
F01_cb941_c2/f3p0/3359-1F	B3-ARF	TF
F01_cb941_c21/f1p0/2653-0F	B3-ARF	TF
F01_cb941_c3/f2p0/3387-0F	B3-ARF	TF
F01_cb941_c4/f1p0/4010-1F	B3-ARF	TF
F01_cb941_c5/f1p2/3351-0F	B3-ARF	TF
F01_cb941_c7/f1p5/3468-1F	B3-ARF	TF
F01_cb941_c8/f1p1/3479-1F	B3-ARF	TF
F01_cb98_c10/f1p0/4273-0F	B3-ARF	TF
F01_cb98_c18/f1p0/4156-2F	B3-ARF	TF
F01_cb98_c29/f1p0/4592-0F	B3-ARF	TF
F01_cb98_c32/f1p0/4565-2F	B3-ARF	TF
F01_cb98_c43/f1p2/4600-2F	B3-ARF	TF
F02_cb11041_c104297/f4p1/2561-2F	B3-ARF	TF
F02_cb11041_c3654/f1p0/2484-0F	B3-ARF	TF
F02_cb11041_c3657/f1p1/2369-2F	B3-ARF	TF
F02_cb11041_c3662/f1p0/2540-1F	B3-ARF	TF
F02_cb11041_c3664/f1p0/2823-1F	B3-ARF	TF
F02_cb11041_c3667/f1p0/2362-2F	B3-ARF	TF
F02_cb11041_c38692/f1p0/3273-2F	B3-ARF	TF
F02_cb11041_c43160/f1p0/3634-0F	B3-ARF	TF
F02_cb11041_c43235/f2p1/2712-2F	B3-ARF	TF
F02_cb11041_c49862/f1p0/3224-0F	B3-ARF	TF
F02_cb11041_c51798/f1p0/3299-0F	B3-ARF	TF
F02_cb1186_c0/f1p0/3919-1F	B3-ARF	TF
F02_cb1186_c1/f1p0/3082-2F	B3-ARF	TF
F02_cb1186_c2/f1p0/3235-0F	B3-ARF	TF
F02_cb1186_c6/f1p0/3153-0F	B3-ARF	TF
F02_cb1189_c10/f1p0/2493-2F	B3-ARF	TF
F02_cb1189_c11/f1p0/3881-0F	B3-ARF	TF
F02_cb1189_c13/f1p1/2797-0F	B3-ARF	TF
F02_cb1189_c21/f2p2/3794-0F	B3-ARF	TF
F02_cb1189_c28/f1p0/2446-1F	B3-ARF	TF
F02_cb1189_c34/f1p0/1993-0F	B3-ARF	TF
F02_cb1346_c18/f2p3/3352-2F	B3-ARF	TF
F02_cb1346_c21/f1p0/3184-2F	B3-ARF	TF
F02_cb1346_c24/f1p0/3273-2F	B3-ARF	TF
F02_cb1346_c27/f1p2/3445-0F	B3-ARF	TF
F02_cb1346_c29/f1p0/3386-0F	B3-ARF	TF
F02_cb1346_c35/f1p1/2902-0F	B3-ARF	TF
F02_cb1346_c39/f1p0/3423-2F	B3-ARF	TF
F02_cb1346_c41/f1p1/3269-2F	B3-ARF	TF
F02_cb1346_c42/f1p0/3407-2F	B3-ARF	TF
F02_cb1346_c49/f1p0/2809-2F	B3-ARF	TF
F02_cb1346_c59/f1p0/3284-2F	B3-ARF	TF
F02_cb1346_c62/f1p2/3239-1F	B3-ARF	TF
F02_cb1346_c78/f1p1/3268-2F	B3-ARF	TF
F02_cb1346_c82/f1p0/3001-0F	B3-ARF	TF
F02_cb1581_c1/f3p1/3372-2F	B3-ARF	TF
F02_cb1581_c12/f1p0/2765-0F	B3-ARF	TF
F02_cb1581_c18/f1p0/3455-1F	B3-ARF	TF
F02_cb1581_c19/f1p0/3490-0F	B3-ARF	TF
F02_cb1581_c2/f2p3/3390-1F	B3-ARF	TF
F02_cb1581_c22/f1p0/3607-1F	B3-ARF	TF
F02_cb1581_c27/f1p2/3473-1F	B3-ARF	TF
F02_cb1581_c35/f1p0/2838-1F	B3-ARF	TF
F02_cb1581_c4/f1p1/3765-2F	B3-ARF	TF
F02_cb1581_c6/f1p0/2940-2F	B3-ARF	TF
F02_cb2005_c11/f1p0/3081-1F	B3-ARF	TF
F02_cb2005_c12/f1p0/2792-0F	B3-ARF	TF
F02_cb2005_c14/f1p0/3095-1F	B3-ARF	TF
F02_cb2005_c2/f1p0/3551-1F	B3-ARF	TF
F02_cb2005_c3/f1p0/2942-1F	B3-ARF	TF
F02_cb2005_c9/f1p0/2805-1F	B3-ARF	TF
F02_cb239_c0/f2p0/4231-0F	B3-ARF	TF
F02_cb239_c2/f1p0/4595-0F	B3-ARF	TF
F02_cb239_c3/f1p0/3641-0F	B3-ARF	TF
F02_cb239_c4/f1p0/4110-1F	B3-ARF	TF
F02_cb252_c13/f1p0/3962-1F	B3-ARF	TF
F02_cb252_c23/f1p0/4467-0F	B3-ARF	TF
F02_cb252_c29/f1p2/4563-2F	B3-ARF	TF
F02_cb252_c37/f1p1/3259-1F	B3-ARF	TF
F02_cb252_c46/f1p0/4867-0F	B3-ARF	TF
F02_cb3059_c10/f1p1/3509-1F	B3-ARF	TF
F02_cb3059_c13/f1p0/2945-1F	B3-ARF	TF
F02_cb3059_c14/f1p0/3004-2F	B3-ARF	TF
F02_cb3059_c18/f1p0/3435-0F	B3-ARF	TF
F02_cb3059_c19/f1p0/3398-1F	B3-ARF	TF
F02_cb3059_c28/f1p0/3469-0F	B3-ARF	TF
F02_cb3059_c9/f1p0/3177-0F	B3-ARF	TF
F02_cb3487_c1/f3p3/3120-0F	B3-ARF	TF
F02_cb3487_c10/f1p1/3054-1F	B3-ARF	TF
F02_cb3487_c8/f1p0/2635-2F	B3-ARF	TF
F02_cb3487_c9/f1p0/3104-2F	B3-ARF	TF
F02_cb3703_c0/f1p0/3064-2F	B3-ARF	TF
F02_cb3929_c2/f1p0/2587-1F	B3-ARF	TF
F02_cb3929_c5/f1p0/2064-1F	B3-ARF	TF
F02_cb4569_c0/f2p0/2130-0F	B3-ARF	TF
F02_cb4569_c3/f1p0/2269-0F	B3-ARF	TF
F02_cb4569_c4/f1p0/2128-1F	B3-ARF	TF
F02_cb4866_c13/f1p0/2683-1F	B3-ARF	TF
F02_cb4866_c14/f1p0/2085-2F	B3-ARF	TF
F02_cb4866_c21/f1p0/2483-0F	B3-ARF	TF
F02_cb4866_c9/f1p0/3092-2F	B3-ARF	TF
F02_cb5218_c1/f2p0/2721-2F	B3-ARF	TF
F02_cb5218_c4/f1p0/2899-1F	B3-ARF	TF
F02_cb5218_c6/f1p1/2636-0F	B3-ARF	TF
F02_cb5218_c7/f1p0/2751-2F	B3-ARF	TF
F02_cb5218_c9/f1p0/2748-0F	B3-ARF	TF
F02_cb5933_c0/f1p0/2612-2F	B3-ARF	TF
F02_cb7118_c11/f1p1/2408-0F	B3-ARF	TF
F02_cb7118_c17/f1p0/2604-0F	B3-ARF	TF
F02_cb7118_c29/f1p1/2781-1F	B3-ARF	TF
F02_cb7118_c4/f3p0/2678-0F	B3-ARF	TF
F02_cb7118_c40/f1p0/2971-1R	B3-ARF	TF
F02_cb7118_c43/f1p0/2611-0F	B3-ARF	TF
F02_cb7118_c46/f1p0/2578-1F	B3-ARF	TF
F02_cb7118_c9/f1p0/2423-2F	B3-ARF	TF
F02_cb8036_c0/f1p0/2283-2F	B3-ARF	TF
F02_cb8036_c2/f1p0/2213-1F	B3-ARF	TF
F02_cb8036_c3/f1p0/2126-1F	B3-ARF	TF
F01_cb10216_c1/f1p0/2038-2F	BBR-BPC	TF
F01_cb10216_c2/f1p0/1906-1F	BBR-BPC	TF
F01_cb10216_c3/f1p0/1897-1F	BBR-BPC	TF
F01_cb10216_c4/f1p0/1827-0F	BBR-BPC	TF
F01_cb10216_c4/f1p0/1827-2F	BBR-BPC	TF
F01_cb10216_c7/f1p0/1345-1F	BBR-BPC	TF
F01_cb10851_c1/f1p0/1972-0F	BBR-BPC	TF
F01_cb10851_c1/f1p0/1972-2F	BBR-BPC	TF
F01_cb14186_c0/f2p0/1527-0F	BBR-BPC	TF
F01_cb14186_c0/f2p0/1527-1F	BBR-BPC	TF
F01_cb14186_c1/f2p0/1432-1F	BBR-BPC	TF
F01_cb14186_c2/f1p0/1583-2F	BBR-BPC	TF
F01_cb14186_c3/f1p0/1610-0F	BBR-BPC	TF
F01_cb14186_c3/f1p0/1610-1F	BBR-BPC	TF
F01_cb14186_c4/f1p0/1524-1F	BBR-BPC	TF
F01_cb22037_c0/f2p0/1290-2F	BBR-BPC	TF
F01_cb22037_c1/f1p0/1386-1F	BBR-BPC	TF
F01_cb6180_c0/f6p0/1431-0F	BBR-BPC	TF
F01_cb6180_c1/f6p0/1453-0F	BBR-BPC	TF
F01_cb6180_c11/f1p0/1269-2F	BBR-BPC	TF
F01_cb6180_c3/f2p0/1547-2F	BBR-BPC	TF
F01_cb6180_c4/f1p0/2639-1F	BBR-BPC	TF
F01_cb6180_c5/f1p0/2017-2F	BBR-BPC	TF
F01_cb6180_c6/f1p0/2129-1F	BBR-BPC	TF
F01_cb6180_c7/f1p0/2150-1F	BBR-BPC	TF
F01_cb6180_c8/f1p0/1534-0F	BBR-BPC	TF
F01_cb6180_c9/f1p0/1532-2F	BBR-BPC	TF
F02_cb10643_c0/f1p0/1910-1F	BBR-BPC	TF
F02_cb17756_c0/f2p0/1240-1F	BBR-BPC	TF
F02_cb17756_c1/f1p0/1284-0F	BBR-BPC	TF
F02_cb3650_c0/f1p0/3084-0F	BBR-BPC	TF
F02_cb3650_c1/f1p0/2633-2F	BBR-BPC	TF
F02_cb6998_c11/f7p0/1428-0F	BBR-BPC	TF
F02_cb6998_c11/f7p0/1428-1F	BBR-BPC	TF
F02_cb6998_c3/f1p0/2441-1F	BBR-BPC	TF
F02_cb6998_c3/f1p0/2441-2F	BBR-BPC	TF
F02_cb6998_c4/f1p0/1990-2F	BBR-BPC	TF
F02_cb6998_c7/f1p0/2118-0R	BBR-BPC	TF
F02_cb6998_c7/f1p0/2118-1F	BBR-BPC	TF
F02_cb6998_c8/f1p0/1434-1F	BBR-BPC	TF
F02_cb6998_c9/f1p0/1436-0F	BBR-BPC	TF
F02_cb8864_c64/f1p0/1927-2F	BBR-BPC	TF
F01_cb10878_c12/f1p0/1646-0F	BES1	TF
F01_cb10878_c4/f2p0/1440-1F	BES1	TF
F01_cb10878_c7/f3p0/1568-0F	BES1	TF
F01_cb10878_c9/f1p0/1948-0F	BES1	TF
F01_cb10878_c9/f1p0/1948-2F	BES1	TF
F01_cb13048_c1/f2p1/1566-1F	BES1	TF
F01_cb13048_c3/f1p0/3419-0F	BES1	TF
F01_cb13048_c5/f1p1/1485-0F	BES1	TF
F01_cb13048_c5/f1p1/1485-1F	BES1	TF
F01_cb16438_c12734/f1p0/3630-2R	BES1	TF
F01_cb16438_c33742/f1p0/4329-0F	BES1	TF
F01_cb18454_c0/f1p0/1284-1F	BES1	TF
F01_cb18454_c1/f1p0/1276-2F	BES1	TF
F01_cb18454_c2/f1p0/1586-2F	BES1	TF
F01_cb20277_c0/f2p0/1359-0F	BES1	TF
F01_cb20277_c2/f1p0/1293-0F	BES1	TF
F01_cb20277_c3/f1p0/1414-1F	BES1	TF
F01_cb20277_c4/f1p0/1358-1F	BES1	TF
F01_cb4775_c1/f1p0/2855-2F	BES1	TF
F01_cb4775_c11/f1p0/2507-2F	BES1	TF
F01_cb4775_c12/f1p0/2978-1F	BES1	TF
F01_cb4775_c15/f1p0/2673-2F	BES1	TF
F01_cb4775_c2/f2p0/2895-0F	BES1	TF
F01_cb4775_c3/f1p0/2704-0F	BES1	TF
F01_cb4775_c3/f1p0/2704-1F	BES1	TF
F01_cb4775_c7/f1p0/2909-0F	BES1	TF
F01_cb4775_c8/f1p0/2763-0F	BES1	TF
F01_cb4775_c9/f1p0/2594-1F	BES1	TF
F01_cb6339_c10/f1p0/2537-0F	BES1	TF
F01_cb6339_c10/f1p0/2537-1F	BES1	TF
F01_cb6339_c11/f1p0/2766-1F	BES1	TF
F01_cb6339_c12/f1p0/2667-2F	BES1	TF
F01_cb6339_c13/f1p0/2521-0F	BES1	TF
F01_cb6339_c14/f1p0/2586-1F	BES1	TF
F01_cb6339_c16/f1p0/2571-1F	BES1	TF
F01_cb6339_c4/f1p0/2610-0F	BES1	TF
F01_cb6339_c6/f1p0/2618-0F	BES1	TF
F01_cb8536_c0/f2p0/1424-1F	BES1	TF
F01_cb8536_c3/f1p0/2035-0F	BES1	TF
F01_cb8536_c3/f1p0/2035-2F	BES1	TF
F01_cb8536_c4/f1p0/1757-1F	BES1	TF
F01_cb8536_c5/f1p0/1717-2F	BES1	TF
F01_cb8536_c6/f1p0/1657-2F	BES1	TF
F01_cb8536_c8/f1p0/1461-2F	BES1	TF
F02_cb11898_c1/f3p0/1709-2F	BES1	TF
F02_cb11898_c6/f1p0/1204-1F	BES1	TF
F02_cb12775_c2/f1p1/1503-1F	BES1	TF
F02_cb2968_c1/f2p0/2821-1F	BES1	TF
F02_cb2968_c2/f1p0/3250-0F	BES1	TF
F02_cb2968_c2/f1p0/3250-1F	BES1	TF
F02_cb2968_c3/f1p1/2657-0F	BES1	TF
F02_cb2968_c4/f1p0/2599-2F	BES1	TF
F02_cb2968_c5/f1p1/2841-1F	BES1	TF
F02_cb2968_c6/f1p1/2859-1F	BES1	TF
F02_cb2968_c7/f1p0/2697-1F	BES1	TF
F02_cb2968_c9/f1p0/2911-2F	BES1	TF
F02_cb3630_c0/f1p0/3081-1F	BES1	TF
F02_cb3630_c1/f1p0/3180-0F	BES1	TF
F02_cb3630_c1/f1p0/3180-1F	BES1	TF
F02_cb4303_c0/f1p0/2925-2R	BES1	TF
F02_cb4303_c1/f1p0/2949-1R	BES1	TF
F02_cb4943_c10/f1p0/2593-1F	BES1	TF
F02_cb4943_c14/f10p0/2583-1F	BES1	TF
F02_cb4943_c15/f2p0/2568-2F	BES1	TF
F02_cb4943_c4/f1p0/2799-1F	BES1	TF
F02_cb4943_c5/f1p0/2661-0F	BES1	TF
F02_cb4943_c6/f1p0/2769-1F	BES1	TF
F02_cb5229_c11/f1p0/1556-1F	BES1	TF
F02_cb5229_c16/f1p0/1521-2F	BES1	TF
F02_cb5229_c17/f3p0/1534-0F	BES1	TF
F02_cb5229_c18/f4p0/1482-1F	BES1	TF
F02_cb5229_c5/f1p0/1946-0F	BES1	TF
F02_cb5229_c5/f1p0/1946-1F	BES1	TF
F02_cb5229_c5/f1p0/1946-2F	BES1	TF
F02_cb5229_c6/f1p0/1488-1F	BES1	TF
F02_cb5229_c8/f1p0/1604-1F	BES1	TF
F01_cb10157_c0/f2p0/1368-0F	bHLH	TF
F01_cb10157_c1/f2p0/1478-0F	bHLH	TF
F01_cb10157_c10/f1p0/1505-0F	bHLH	TF
F01_cb10157_c11/f1p0/1434-1F	bHLH	TF
F01_cb10157_c15/f1p0/1370-0F	bHLH	TF
F01_cb10157_c16/f1p0/1310-0F	bHLH	TF
F01_cb10157_c17/f1p0/1275-0F	bHLH	TF
F01_cb10157_c2/f1p0/2048-1F	bHLH	TF
F01_cb10157_c3/f1p0/1637-1F	bHLH	TF
F01_cb10157_c4/f1p0/2028-0F	bHLH	TF
F01_cb10157_c6/f1p0/1595-0F	bHLH	TF
F01_cb10157_c8/f1p0/1535-0F	bHLH	TF
F01_cb10157_c9/f1p0/1520-0F	bHLH	TF
F01_cb1017_c1/f2p0/2282-1F	bHLH	TF
F01_cb1017_c2/f1p0/3963-2F	bHLH	TF
F01_cb1017_c2/f1p0/3963-2R	bHLH	TF
F01_cb1017_c4/f1p0/2114-0F	bHLH	TF
F01_cb1017_c6/f1p0/2223-2F	bHLH	TF
F01_cb1017_c7/f1p0/2109-2F	bHLH	TF
F01_cb10510_c1/f1p0/2152-1F	bHLH	TF
F01_cb10563_c2/f1p0/1928-1F	bHLH	TF
F01_cb10656_c0/f5p0/1655-0F	bHLH	TF
F01_cb10656_c1/f1p0/1978-1F	bHLH	TF
F01_cb10656_c3/f1p0/1737-0F	bHLH	TF
F01_cb10656_c4/f1p0/1639-0F	bHLH	TF
F01_cb10656_c6/f1p0/890-1F	bHLH	TF
F01_cb10788_c1/f1p0/1731-1F	bHLH	TF
F01_cb10865_c0/f5p0/1872-2F	bHLH	TF
F01_cb10865_c2/f1p0/1851-0F	bHLH	TF
F01_cb11163_c1/f2p0/1811-1F	bHLH	TF
F01_cb11163_c7/f1p0/1834-2F	bHLH	TF
F01_cb11207_c0/f4p0/1871-0F	bHLH	TF
F01_cb11207_c2/f1p0/2405-1F	bHLH	TF
F01_cb11207_c4/f1p0/1840-0F	bHLH	TF
F01_cb11439_c7/f3p0/1821-0F	bHLH	TF
F01_cb11593_c0/f1p0/1851-0F	bHLH	TF
F01_cb11593_c2/f1p0/1604-2F	bHLH	TF
F01_cb11593_c3/f1p0/1478-1F	bHLH	TF
F01_cb11593_c6/f1p0/1357-1F	bHLH	TF
F01_cb11941_c2/f2p0/1786-0F	bHLH	TF
F01_cb11941_c3/f1p0/3760-1F	bHLH	TF
F01_cb11941_c5/f1p0/1876-1F	bHLH	TF
F01_cb12116_c2/f1p0/1266-0F	bHLH	TF
F01_cb12125_c1/f1p1/1745-1F	bHLH	TF
F01_cb12280_c0/f2p0/1743-1F	bHLH	TF
F01_cb12803_c0/f1p0/1656-1F	bHLH	TF
F01_cb12803_c1/f1p0/1933-0F	bHLH	TF
F01_cb13021_c1/f1p0/1670-1F	bHLH	TF
F01_cb13363_c0/f10p0/1533-2F	bHLH	TF
F01_cb13363_c1/f1p0/1572-0F	bHLH	TF
F01_cb13363_c3/f1p0/1584-2F	bHLH	TF
F01_cb13363_c4/f1p0/1528-2F	bHLH	TF
F01_cb13743_c1/f1p0/2533-1F	bHLH	TF
F01_cb13743_c2/f1p0/1099-1F	bHLH	TF
F01_cb13743_c3/f1p0/1124-2F	bHLH	TF
F01_cb13975_c1/f1p0/1971-2F	bHLH	TF
F01_cb14405_c3/f1p0/1895-2F	bHLH	TF
F01_cb14405_c4/f1p0/1558-1F	bHLH	TF
F01_cb14681_c0/f1p0/1505-0F	bHLH	TF
F01_cb14681_c1/f1p0/2265-2F	bHLH	TF
F01_cb14766_c2/f1p0/1143-2F	bHLH	TF
F01_cb15461_c0/f6p0/1000-0F	bHLH	TF
F01_cb15461_c2/f1p0/932-2F	bHLH	TF
F01_cb16438_c37506/f1p0/1789-1F	bHLH	TF
F01_cb16438_c8582/f5p0/1701-0F	bHLH	TF
F01_cb16493_c2/f1p0/567-0F	bHLH	TF
F01_cb16493_c3/f1p0/1322-1F	bHLH	TF
F01_cb16589_c1/f1p0/1414-1F	bHLH	TF
F01_cb16589_c2/f1p0/1475-2F	bHLH	TF
F01_cb16589_c5/f1p0/1469-2F	bHLH	TF
F01_cb17138_c0/f2p0/1357-1F	bHLH	TF
F01_cb17138_c10/f1p0/946-0F	bHLH	TF
F01_cb17138_c11/f1p0/1894-0F	bHLH	TF
F01_cb17138_c13/f1p0/1434-2F	bHLH	TF
F01_cb17138_c14/f1p0/1338-1F	bHLH	TF
F01_cb17481_c0/f3p0/1097-1F	bHLH	TF
F01_cb19306_c1/f1p0/1522-1F	bHLH	TF
F01_cb19472_c1/f1p0/1424-1F	bHLH	TF
F01_cb20399_c0/f6p0/949-1F	bHLH	TF
F01_cb20399_c2/f1p0/1306-0F	bHLH	TF
F01_cb20399_c4/f1p0/1084-2F	bHLH	TF
F01_cb20399_c5/f1p0/1460-1F	bHLH	TF
F01_cb20399_c6/f1p0/965-1F	bHLH	TF
F01_cb20553_c0/f1p0/1147-1F	bHLH	TF
F01_cb20553_c1/f1p0/1192-0F	bHLH	TF
F01_cb21312_c0/f1p0/1012-2F	bHLH	TF
F01_cb21312_c1/f1p0/1026-2F	bHLH	TF
F01_cb21514_c0/f1p0/1417-0F	bHLH	TF
F01_cb21703_c1/f1p1/1522-0F	bHLH	TF
F01_cb21715_c0/f1p0/1416-1F	bHLH	TF
F01_cb21715_c1/f1p0/1151-1F	bHLH	TF
F01_cb22019_c0/f1p0/935-1F	bHLH	TF
F01_cb22019_c1/f1p0/1442-0R	bHLH	TF
F01_cb22019_c1/f1p0/1442-2F	bHLH	TF
F01_cb2510_c1/f1p0/2934-0R	bHLH	TF
F01_cb3117_c0/f1p0/3267-0F	bHLH	TF
F01_cb3117_c1/f1p0/2027-1F	bHLH	TF
F01_cb4567_c10/f1p0/2202-0F	bHLH	TF
F01_cb4567_c11/f1p0/2425-1F	bHLH	TF
F01_cb4567_c7/f1p0/2466-2F	bHLH	TF
F01_cb4567_c9/f1p0/2036-1F	bHLH	TF
F01_cb4590_c1/f1p0/2812-2F	bHLH	TF
F01_cb4590_c2/f1p0/2793-1F	bHLH	TF
F01_cb4590_c3/f1p0/2705-2F	bHLH	TF
F01_cb4590_c4/f1p0/2787-2F	bHLH	TF
F01_cb4590_c5/f1p0/2672-2F	bHLH	TF
F01_cb4617_c16/f1p0/2922-0F	bHLH	TF
F01_cb4617_c20/f1p0/2592-1F	bHLH	TF
F01_cb4617_c29/f1p3/2502-1F	bHLH	TF
F01_cb4617_c37/f1p0/4782-0F	bHLH	TF
F01_cb4617_c53/f12p6/2399-0F	bHLH	TF
F01_cb4716_c0/f4p1/2326-2F	bHLH	TF
F01_cb4716_c2/f1p1/2900-2F	bHLH	TF
F01_cb480_c14/f1p0/1844-0R	bHLH	TF
F01_cb676_c3/f2p1/1243-1F	bHLH	TF
F01_cb676_c4/f1p0/4124-0F	bHLH	TF
F01_cb676_c5/f1p0/2875-0F	bHLH	TF
F01_cb676_c8/f1p0/2814-2F	bHLH	TF
F01_cb676_c9/f1p1/1196-0F	bHLH	TF
F01_cb6981_c1/f1p0/3006-1F	bHLH	TF
F01_cb6983_c0/f7p0/2552-2F	bHLH	TF
F01_cb6983_c4/f1p0/2640-2F	bHLH	TF
F01_cb6983_c5/f1p0/2547-1F	bHLH	TF
F01_cb7181_c4/f1p0/1891-2F	bHLH	TF
F01_cb7181_c7/f1p0/1930-2F	bHLH	TF
F01_cb7181_c8/f1p0/1742-0F	bHLH	TF
F01_cb7200_c3/f1p0/2425-1F	bHLH	TF
F01_cb7200_c4/f1p0/2423-2F	bHLH	TF
F01_cb7200_c5/f1p0/2313-0F	bHLH	TF
F01_cb7489_c0/f3p1/2094-1F	bHLH	TF
F01_cb7489_c2/f1p0/2250-0F	bHLH	TF
F01_cb8011_c0/f1p2/2346-2F	bHLH	TF
F01_cb8011_c1/f1p1/2312-2F	bHLH	TF
F01_cb8011_c2/f1p0/2309-2F	bHLH	TF
F01_cb8011_c3/f1p0/2141-1F	bHLH	TF
F01_cb8075_c1/f1p0/2230-0F	bHLH	TF
F01_cb8075_c3/f1p0/2449-2F	bHLH	TF
F01_cb8092_c0/f2p0/2333-2F	bHLH	TF
F01_cb8182_c1/f1p0/2026-1F	bHLH	TF
F01_cb8182_c2/f1p0/1899-0F	bHLH	TF
F01_cb8254_c0/f2p1/2120-2F	bHLH	TF
F01_cb8254_c1/f1p1/2300-1F	bHLH	TF
F01_cb8254_c2/f1p1/2183-2F	bHLH	TF
F01_cb8254_c4/f1p1/2359-1F	bHLH	TF
F01_cb8335_c16/f1p0/1488-2F	bHLH	TF
F01_cb8335_c4/f2p0/1663-1F	bHLH	TF
F01_cb8335_c6/f1p0/2068-1F	bHLH	TF
F01_cb8335_c8/f1p0/1787-2F	bHLH	TF
F01_cb8394_c1/f1p0/2296-0F	bHLH	TF
F01_cb8704_c13/f1p0/1566-1F	bHLH	TF
F01_cb8704_c3/f2p0/2242-0F	bHLH	TF
F01_cb8704_c4/f1p0/1822-1F	bHLH	TF
F01_cb8704_c6/f1p0/1844-2F	bHLH	TF
F01_cb8704_c7/f1p0/1874-1F	bHLH	TF
F01_cb8705_c1/f1p0/2263-0F	bHLH	TF
F01_cb8705_c2/f1p0/1638-1F	bHLH	TF
F01_cb8705_c3/f1p0/1626-0F	bHLH	TF
F01_cb8705_c4/f1p0/1411-1F	bHLH	TF
F01_cb9005_c1/f3p0/1543-1F	bHLH	TF
F01_cb9005_c2/f3p0/1491-0F	bHLH	TF
F01_cb9207_c0/f1p0/2176-0F	bHLH	TF
F01_cb9207_c2/f1p0/2425-2F	bHLH	TF
F01_cb9207_c3/f1p0/2926-1F	bHLH	TF
F02_cb10038_c0/f1p0/2000-2F	bHLH	TF
F02_cb10038_c1/f1p0/1870-0F	bHLH	TF
F02_cb10038_c2/f1p0/1629-1F	bHLH	TF
F02_cb10038_c3/f1p0/1455-2F	bHLH	TF
F02_cb10038_c5/f1p0/1467-1F	bHLH	TF
F02_cb10322_c0/f1p0/1958-1F	bHLH	TF
F02_cb10322_c2/f1p0/1902-0F	bHLH	TF
F02_cb10322_c3/f1p0/1806-2F	bHLH	TF
F02_cb10381_c3/f1p0/1897-1F	bHLH	TF
F02_cb10381_c4/f1p0/1292-2F	bHLH	TF
F02_cb10393_c0/f1p0/1896-1F	bHLH	TF
F02_cb10393_c1/f1p0/1767-2F	bHLH	TF
F02_cb10432_c1/f1p0/1551-1F	bHLH	TF
F02_cb10432_c2/f1p0/1774-1F	bHLH	TF
F02_cb10432_c3/f1p0/1427-0F	bHLH	TF
F02_cb10432_c4/f1p0/1597-0F	bHLH	TF
F02_cb10483_c0/f2p0/1868-0F	bHLH	TF
F02_cb10483_c1/f1p0/1720-2F	bHLH	TF
F02_cb10645_c0/f1p1/1920-2F	bHLH	TF
F02_cb10645_c2/f1p0/1859-1F	bHLH	TF
F02_cb10873_c1/f3p0/1700-0F	bHLH	TF
F02_cb10873_c3/f2p0/1885-2F	bHLH	TF
F02_cb10873_c7/f1p0/1707-0F	bHLH	TF
F02_cb11041_c107982/f2p0/2296-0F	bHLH	TF
F02_cb11041_c1349/f1p0/1881-2F	bHLH	TF
F02_cb11041_c2214/f2p0/1453-1F	bHLH	TF
F02_cb11041_c38276/f1p0/2467-0F	bHLH	TF
F02_cb11041_c43466/f4p1/1869-1F	bHLH	TF
F02_cb11041_c45483/f1p0/1358-1F	bHLH	TF
F02_cb11041_c53634/f1p0/1550-0F	bHLH	TF
F02_cb11041_c57283/f1p1/2440-1F	bHLH	TF
F02_cb11041_c58844/f1p0/3419-2F	bHLH	TF
F02_cb11041_c73617/f7p0/1718-0F	bHLH	TF
F02_cb11041_c73943/f1p0/1746-2F	bHLH	TF
F02_cb11041_c74064/f7p0/1723-0F	bHLH	TF
F02_cb11041_c78154/f1p0/1606-0F	bHLH	TF
F02_cb11041_c79232/f1p0/1703-1F	bHLH	TF
F02_cb11041_c81576/f1p0/1390-1F	bHLH	TF
F02_cb11041_c83523/f1p0/2422-1F	bHLH	TF
F02_cb11041_c87821/f2p0/1764-2F	bHLH	TF
F02_cb11041_c88886/f1p0/1805-2F	bHLH	TF
F02_cb11312_c1/f1p0/1894-2F	bHLH	TF
F02_cb11475_c1/f2p0/1741-2F	bHLH	TF
F02_cb11475_c2/f1p0/1781-0F	bHLH	TF
F02_cb11475_c3/f1p0/1817-2F	bHLH	TF
F02_cb11994_c1/f2p1/1505-0F	bHLH	TF
F02_cb11994_c10/f1p0/881-1F	bHLH	TF
F02_cb11994_c3/f1p1/1691-0F	bHLH	TF
F02_cb11994_c4/f1p0/1603-0F	bHLH	TF
F02_cb11994_c5/f1p0/1574-0F	bHLH	TF
F02_cb11994_c6/f1p0/1629-0F	bHLH	TF
F02_cb11994_c7/f1p0/1642-2F	bHLH	TF
F02_cb11994_c8/f1p0/1590-1F	bHLH	TF
F02_cb12010_c0/f7p0/1485-1F	bHLH	TF
F02_cb12010_c1/f1p0/1693-0F	bHLH	TF
F02_cb12328_c1/f1p0/1922-2F	bHLH	TF
F02_cb12328_c2/f1p0/977-2F	bHLH	TF
F02_cb12968_c0/f1p0/1502-2F	bHLH	TF
F02_cb12968_c1/f1p0/1493-2F	bHLH	TF
F02_cb13071_c0/f1p0/1481-0F	bHLH	TF
F02_cb13071_c1/f1p0/1500-0F	bHLH	TF
F02_cb13071_c2/f1p0/1416-0F	bHLH	TF
F02_cb13199_c0/f2p0/1454-1F	bHLH	TF
F02_cb13355_c0/f1p0/1416-0F	bHLH	TF
F02_cb13355_c1/f1p0/1421-0F	bHLH	TF
F02_cb13656_c0/f1p0/1328-0F	bHLH	TF
F02_cb13656_c1/f1p0/1664-1F	bHLH	TF
F02_cb13691_c1/f1p0/1400-1F	bHLH	TF
F02_cb13703_c11/f1p0/1078-2F	bHLH	TF
F02_cb13703_c3/f1p0/1317-2F	bHLH	TF
F02_cb13703_c4/f1p0/1309-2F	bHLH	TF
F02_cb13703_c5/f1p0/2197-2F	bHLH	TF
F02_cb14802_c0/f1p0/1246-0F	bHLH	TF
F02_cb14802_c1/f1p0/1530-0F	bHLH	TF
F02_cb14802_c1/f1p0/1530-0R	bHLH	TF
F02_cb14802_c2/f1p0/1051-0F	bHLH	TF
F02_cb14875_c0/f1p0/1143-2F	bHLH	TF
F02_cb14998_c0/f1p0/1210-2F	bHLH	TF
F02_cb14998_c1/f1p0/1810-0F	bHLH	TF
F02_cb16805_c0/f2p0/1034-0F	bHLH	TF
F02_cb16902_c1/f1p0/1237-2F	bHLH	TF
F02_cb18599_c0/f3p0/1002-1F	bHLH	TF
F02_cb19011_c0/f1p0/1218-2F	bHLH	TF
F02_cb19011_c1/f1p0/1203-0F	bHLH	TF
F02_cb19089_c0/f1p0/998-0F	bHLH	TF
F02_cb19404_c0/f2p0/921-0F	bHLH	TF
F02_cb19404_c1/f1p0/902-2F	bHLH	TF
F02_cb3715_c2/f1p0/2397-2F	bHLH	TF
F02_cb3715_c7/f1p0/2460-2F	bHLH	TF
F02_cb3715_c8/f1p0/2291-2F	bHLH	TF
F02_cb3748_c10/f1p0/1193-1F	bHLH	TF
F02_cb3748_c11/f1p1/1179-0F	bHLH	TF
F02_cb3748_c12/f1p2/1160-2F	bHLH	TF
F02_cb3748_c16/f4p1/1175-2F	bHLH	TF
F02_cb3748_c17/f7p1/1143-2F	bHLH	TF
F02_cb3748_c3/f2p1/1145-0F	bHLH	TF
F02_cb3748_c6/f1p0/2503-2F	bHLH	TF
F02_cb3748_c7/f1p0/1481-0F	bHLH	TF
F02_cb3748_c8/f1p0/2536-2F	bHLH	TF
F02_cb4716_c1/f1p0/1434-1F	bHLH	TF
F02_cb4716_c2/f1p0/1600-1F	bHLH	TF
F02_cb5104_c0/f1p1/2777-1F	bHLH	TF
F02_cb5104_c2/f1p1/2412-0F	bHLH	TF
F02_cb5104_c5/f1p0/2102-1F	bHLH	TF
F02_cb5104_c6/f1p0/1903-1F	bHLH	TF
F02_cb5172_c0/f2p1/1586-2F	bHLH	TF
F02_cb5172_c1/f1p0/2754-0F	bHLH	TF
F02_cb5172_c2/f1p0/1089-2F	bHLH	TF
F02_cb5204_c0/f1p0/2745-0F	bHLH	TF
F02_cb5204_c1/f1p0/2194-1F	bHLH	TF
F02_cb5627_c1/f1p0/2674-2F	bHLH	TF
F02_cb5627_c10/f1p1/2211-0F	bHLH	TF
F02_cb5627_c2/f1p0/2550-0F	bHLH	TF
F02_cb5627_c5/f1p0/2199-0F	bHLH	TF
F02_cb5627_c6/f1p3/2283-2F	bHLH	TF
F02_cb5627_c9/f1p0/2397-2F	bHLH	TF
F02_cb5766_c16/f1p1/2553-1F	bHLH	TF
F02_cb5766_c21/f1p0/2568-0F	bHLH	TF
F02_cb5766_c25/f1p1/2424-2F	bHLH	TF
F02_cb5766_c32/f1p0/2205-0F	bHLH	TF
F02_cb5766_c40/f15p0/2389-1F	bHLH	TF
F02_cb5766_c7/f2p0/2335-0F	bHLH	TF
F02_cb5838_c0/f4p2/2537-1F	bHLH	TF
F02_cb5838_c2/f1p2/2635-2F	bHLH	TF
F02_cb5838_c3/f1p1/2598-2F	bHLH	TF
F02_cb6132_c0/f1p0/2585-2F	bHLH	TF
F02_cb6132_c1/f1p0/2194-2F	bHLH	TF
F02_cb6132_c10/f1p0/2495-2F	bHLH	TF
F02_cb6132_c11/f1p0/2459-0F	bHLH	TF
F02_cb6132_c12/f1p1/1978-0F	bHLH	TF
F02_cb6132_c13/f1p1/2214-2F	bHLH	TF
F02_cb6132_c15/f1p0/2061-0F	bHLH	TF
F02_cb6132_c2/f1p1/2218-0F	bHLH	TF
F02_cb6132_c3/f1p0/2585-2F	bHLH	TF
F02_cb6132_c5/f1p0/2466-1F	bHLH	TF
F02_cb6132_c6/f1p0/2228-1F	bHLH	TF
F02_cb6321_c1/f1p0/2212-1F	bHLH	TF
F02_cb6321_c2/f1p0/2555-0F	bHLH	TF
F02_cb6321_c3/f1p0/2027-0F	bHLH	TF
F02_cb6756_c1/f1p0/2256-0F	bHLH	TF
F02_cb7183_c1/f1p1/2413-0F	bHLH	TF
F02_cb7183_c3/f1p1/2373-1F	bHLH	TF
F02_cb7183_c4/f1p0/2335-2F	bHLH	TF
F02_cb7183_c5/f1p0/2313-1F	bHLH	TF
F02_cb7183_c6/f1p0/2415-0F	bHLH	TF
F02_cb7763_c1/f1p0/1597-1F	bHLH	TF
F02_cb7779_c13/f3p0/1992-0F	bHLH	TF
F02_cb7779_c8/f1p0/2154-1F	bHLH	TF
F02_cb7779_c9/f1p0/1992-0F	bHLH	TF
F02_cb8419_c0/f1p0/2232-1F	bHLH	TF
F02_cb8419_c1/f1p0/2097-1F	bHLH	TF
F02_cb8419_c5/f1p0/1338-0F	bHLH	TF
F02_cb8419_c6/f1p0/1548-0F	bHLH	TF
F02_cb8550_c0/f2p0/1939-2F	bHLH	TF
F02_cb8550_c2/f1p0/1894-1F	bHLH	TF
F02_cb8550_c3/f1p0/1957-0F	bHLH	TF
F02_cb8778_c1/f2p0/2160-0F	bHLH	TF
F02_cb8778_c2/f1p0/2180-1F	bHLH	TF
F02_cb8778_c3/f1p0/3270-1F	bHLH	TF
F02_cb8778_c4/f1p0/1622-1F	bHLH	TF
F02_cb8778_c5/f1p0/2505-2F	bHLH	TF
F02_cb8778_c6/f2p0/2143-0F	bHLH	TF
F02_cb8778_c7/f1p0/2065-1F	bHLH	TF
F02_cb8779_c0/f1p0/2180-0F	bHLH	TF
F02_cb9085_c0/f2p0/2149-2F	bHLH	TF
F02_cb9164_c1/f1p0/1917-2F	bHLH	TF
F02_cb9437_c0/f1p0/2084-0F	bHLH	TF
F02_cb9437_c2/f1p0/2070-2F	bHLH	TF
F02_cb9768_c2/f1p0/1404-2F	bHLH	TF
F01_cb7027_c3/f1p1/2411-2F	BSD	TF
F01_cb7027_c4/f1p0/2304-1F	BSD	TF
F01_cb7027_c5/f1p1/2537-2F	BSD	TF
F02_cb4232_c0/f2p0/2279-1F	BSD	TF
F02_cb4232_c2/f1p0/2354-0F	BSD	TF
F01_cb10766_c0/f1p0/1964-2F	BUB	PK
F01_cb10766_c1/f1p0/1799-2F	BUB	PK
F01_cb10553_c1/f1p0/1999-2F	bZIP	TF
F01_cb10553_c3/f1p0/1806-2F	bZIP	TF
F01_cb10817_c0/f1p0/1960-1F	bZIP	TF
F01_cb10817_c1/f1p0/1769-1F	bZIP	TF
F01_cb11168_c0/f1p0/1907-0F	bZIP	TF
F01_cb11871_c2/f1p0/1799-2F	bZIP	TF
F01_cb11871_c3/f1p0/1805-2F	bZIP	TF
F01_cb11871_c5/f1p0/1615-1F	bZIP	TF
F01_cb11943_c0/f2p0/1697-2F	bZIP	TF
F01_cb11943_c2/f1p0/1719-1F	bZIP	TF
F01_cb11943_c3/f1p0/1139-1F	bZIP	TF
F01_cb12391_c10/f4p0/1718-0F	bZIP	TF
F01_cb12391_c11/f1p0/1743-1F	bZIP	TF
F01_cb12391_c3/f1p0/1718-1F	bZIP	TF
F01_cb12391_c4/f1p1/1826-0F	bZIP	TF
F01_cb12391_c8/f1p1/1551-0F	bZIP	TF
F01_cb12452_c0/f2p0/1658-1F	bZIP	TF
F01_cb12452_c1/f1p0/1709-1F	bZIP	TF
F01_cb12452_c2/f1p0/1650-2F	bZIP	TF
F01_cb12452_c3/f1p0/1563-0F	bZIP	TF
F01_cb12537_c0/f2p1/1610-1F	bZIP	TF
F01_cb12537_c1/f1p0/1702-2F	bZIP	TF
F01_cb12537_c2/f1p0/1618-2F	bZIP	TF
F01_cb12537_c3/f1p0/1473-0F	bZIP	TF
F01_cb13193_c0/f3p0/1171-0F	bZIP	TF
F01_cb13193_c2/f1p0/3146-1F	bZIP	TF
F01_cb13193_c4/f1p0/1060-0F	bZIP	TF
F01_cb13193_c8/f2p0/1177-2F	bZIP	TF
F01_cb13203_c0/f1p0/1350-0F	bZIP	TF
F01_cb13203_c1/f1p0/2743-2F	bZIP	TF
F01_cb13203_c2/f1p0/1282-1F	bZIP	TF
F01_cb13203_c3/f1p0/929-2F	bZIP	TF
F01_cb13518_c0/f1p0/1551-2F	bZIP	TF
F01_cb13518_c1/f1p0/2335-1F	bZIP	TF
F01_cb13624_c1/f2p0/1533-1F	bZIP	TF
F01_cb13624_c2/f1p0/1160-1F	bZIP	TF
F01_cb13624_c3/f1p0/1991-2F	bZIP	TF
F01_cb13624_c4/f1p0/1511-2F	bZIP	TF
F01_cb13624_c5/f1p0/1566-2F	bZIP	TF
F01_cb13678_c4/f1p0/1577-2F	bZIP	TF
F01_cb14296_c3/f1p0/1599-0F	bZIP	TF
F01_cb15108_c0/f2p0/1200-1F	bZIP	TF
F01_cb15108_c1/f1p0/951-1F	bZIP	TF
F01_cb15108_c3/f1p0/856-0F	bZIP	TF
F01_cb15108_c4/f1p0/1051-1F	bZIP	TF
F01_cb15108_c5/f1p0/1080-1F	bZIP	TF
F01_cb15108_c6/f1p0/1497-2F	bZIP	TF
F01_cb15182_c1/f1p0/1134-1F	bZIP	TF
F01_cb15182_c2/f1p0/1067-0F	bZIP	TF
F01_cb15182_c4/f1p0/1149-0F	bZIP	TF
F01_cb15681_c1/f2p0/1282-0F	bZIP	TF
F01_cb15681_c3/f1p0/1118-1F	bZIP	TF
F01_cb16216_c1/f1p0/1569-2F	bZIP	TF
F01_cb16216_c2/f1p0/1596-0F	bZIP	TF
F01_cb16216_c4/f1p0/1507-2F	bZIP	TF
F01_cb16369_c10/f5p0/1173-2F	bZIP	TF
F01_cb16369_c11/f1p0/1168-0F	bZIP	TF
F01_cb16369_c2/f1p0/978-0F	bZIP	TF
F01_cb16369_c4/f1p0/1122-1F	bZIP	TF
F01_cb16369_c5/f1p0/1144-1F	bZIP	TF
F01_cb16369_c7/f1p0/1231-1F	bZIP	TF
F01_cb16369_c8/f1p0/1234-1F	bZIP	TF
F01_cb16438_c3187/f1p0/2440-1F	bZIP	TF
F01_cb16438_c33082/f1p0/2441-0F	bZIP	TF
F01_cb16438_c35723/f1p0/2024-2F	bZIP	TF
F01_cb16438_c38426/f1p0/2278-1F	bZIP	TF
F01_cb16438_c4010/f1p0/3038-1F	bZIP	TF
F01_cb16438_c4022/f3p0/1965-2F	bZIP	TF
F01_cb16438_c4023/f1p0/2455-2F	bZIP	TF
F01_cb16545_c1/f2p1/999-0F	bZIP	TF
F01_cb16545_c5/f1p1/1149-1F	bZIP	TF
F01_cb16545_c7/f1p1/1155-1F	bZIP	TF
F01_cb16545_c8/f1p0/1441-2F	bZIP	TF
F01_cb17039_c0/f1p0/1105-2F	bZIP	TF
F01_cb17817_c0/f4p1/1521-1F	bZIP	TF
F01_cb17817_c2/f1p0/1552-2F	bZIP	TF
F01_cb17817_c4/f1p1/1456-1F	bZIP	TF
F01_cb18168_c0/f1p0/895-0F	bZIP	TF
F01_cb18168_c1/f1p0/872-0F	bZIP	TF
F01_cb18718_c3/f1p0/1361-1F	bZIP	TF
F01_cb21085_c0/f2p0/1265-0F	bZIP	TF
F01_cb21085_c1/f1p0/1332-0F	bZIP	TF
F01_cb22069_c0/f2p0/1384-1F	bZIP	TF
F01_cb22220_c0/f1p0/883-0F	bZIP	TF
F01_cb22220_c1/f1p0/578-1F	bZIP	TF
F01_cb3734_c1/f1p0/2121-0F	bZIP	TF
F01_cb3836_c0/f14p1/2640-2F	bZIP	TF
F01_cb3836_c2/f2p1/3129-1F	bZIP	TF
F01_cb3836_c6/f1p1/2731-0F	bZIP	TF
F01_cb3836_c9/f1p1/2227-2F	bZIP	TF
F01_cb4118_c1/f3p0/1796-2F	bZIP	TF
F01_cb4118_c10/f1p0/2517-0F	bZIP	TF
F01_cb4118_c12/f1p0/1770-2F	bZIP	TF
F01_cb4118_c13/f1p0/2492-0F	bZIP	TF
F01_cb4118_c15/f1p0/1659-2F	bZIP	TF
F01_cb4118_c16/f1p0/2123-2F	bZIP	TF
F01_cb4118_c18/f1p0/1699-2F	bZIP	TF
F01_cb4118_c2/f2p0/1698-1F	bZIP	TF
F01_cb4118_c23/f8p0/1655-1F	bZIP	TF
F01_cb4118_c7/f1p0/2070-1F	bZIP	TF
F01_cb4485_c1/f4p0/2355-2F	bZIP	TF
F01_cb4485_c11/f1p0/2153-0F	bZIP	TF
F01_cb4485_c12/f1p1/2381-1F	bZIP	TF
F01_cb4485_c15/f1p0/2327-1F	bZIP	TF
F01_cb4485_c16/f1p1/2365-1F	bZIP	TF
F01_cb4485_c17/f1p0/2188-2F	bZIP	TF
F01_cb4485_c18/f1p0/3093-2F	bZIP	TF
F01_cb4485_c19/f1p0/2442-1F	bZIP	TF
F01_cb4485_c21/f1p0/2302-1F	bZIP	TF
F01_cb4485_c22/f1p0/2272-2F	bZIP	TF
F01_cb4485_c4/f2p1/2347-1F	bZIP	TF
F01_cb4485_c6/f1p0/2956-0F	bZIP	TF
F01_cb4485_c7/f1p0/2843-2F	bZIP	TF
F01_cb4485_c8/f1p0/2786-0F	bZIP	TF
F01_cb4485_c9/f1p0/2843-1F	bZIP	TF
F01_cb5951_c0/f3p0/1754-0F	bZIP	TF
F01_cb5951_c11/f1p0/1698-2F	bZIP	TF
F01_cb5951_c7/f1p0/2577-1F	bZIP	TF
F01_cb5951_c8/f1p0/1748-0F	bZIP	TF
F01_cb5963_c10/f1p0/2170-1F	bZIP	TF
F01_cb5963_c11/f1p0/2395-0F	bZIP	TF
F01_cb5963_c13/f1p0/1986-0F	bZIP	TF
F01_cb5963_c18/f1p0/2070-2F	bZIP	TF
F01_cb5963_c21/f1p0/2565-0F	bZIP	TF
F01_cb5963_c22/f1p0/1977-0F	bZIP	TF
F01_cb5963_c24/f1p1/2331-2F	bZIP	TF
F01_cb5963_c28/f1p0/2211-0F	bZIP	TF
F01_cb6029_c2/f3p0/1668-1F	bZIP	TF
F01_cb6029_c30/f1p0/1679-0F	bZIP	TF
F01_cb6029_c31/f1p0/1699-2F	bZIP	TF
F01_cb6029_c32/f1p0/2052-1F	bZIP	TF
F01_cb6029_c35/f3p0/1665-0F	bZIP	TF
F01_cb6029_c4/f2p0/1611-2F	bZIP	TF
F01_cb6029_c5/f2p0/1660-1F	bZIP	TF
F01_cb6542_c1/f1p0/2582-2F	bZIP	TF
F01_cb6542_c10/f1p0/1596-2F	bZIP	TF
F01_cb6542_c11/f1p0/1539-2F	bZIP	TF
F01_cb6542_c13/f1p0/1489-2F	bZIP	TF
F01_cb6542_c2/f1p1/2442-0F	bZIP	TF
F01_cb6542_c5/f1p0/2291-2F	bZIP	TF
F01_cb6542_c6/f1p0/1660-0F	bZIP	TF
F01_cb6542_c9/f1p0/1671-2F	bZIP	TF
F01_cb7376_c0/f3p1/2456-1F	bZIP	TF
F01_cb7376_c10/f1p0/1998-1F	bZIP	TF
F01_cb7376_c3/f2p0/2564-2F	bZIP	TF
F01_cb7376_c4/f1p0/2632-0F	bZIP	TF
F01_cb7376_c7/f1p0/2556-2F	bZIP	TF
F01_cb7801_c10/f1p0/1440-0F	bZIP	TF
F01_cb7801_c11/f1p0/1350-0F	bZIP	TF
F01_cb7801_c2/f1p0/2378-2F	bZIP	TF
F01_cb7801_c4/f1p0/2158-0F	bZIP	TF
F01_cb7801_c5/f1p0/1697-1F	bZIP	TF
F01_cb7801_c6/f1p0/1803-0F	bZIP	TF
F01_cb7801_c7/f1p0/1782-0F	bZIP	TF
F01_cb7801_c8/f1p0/1666-1F	bZIP	TF
F01_cb7801_c9/f1p0/1624-2F	bZIP	TF
F01_cb8106_c1/f2p0/1850-1F	bZIP	TF
F01_cb8106_c13/f1p0/1933-2F	bZIP	TF
F01_cb8106_c15/f1p0/1676-1F	bZIP	TF
F01_cb8106_c2/f1p0/2365-0F	bZIP	TF
F01_cb8106_c4/f1p0/2701-1F	bZIP	TF
F01_cb8106_c6/f1p0/1811-0F	bZIP	TF
F01_cb8106_c9/f1p0/1925-1F	bZIP	TF
F01_cb8290_c0/f3p0/2243-1F	bZIP	TF
F01_cb8290_c2/f1p0/2056-0F	bZIP	TF
F01_cb8583_c10/f1p0/1358-0F	bZIP	TF
F01_cb8583_c11/f1p0/1328-0F	bZIP	TF
F01_cb8583_c3/f1p0/1755-2F	bZIP	TF
F01_cb8583_c4/f1p2/1681-2F	bZIP	TF
F01_cb8583_c6/f1p0/1679-0F	bZIP	TF
F01_cb8583_c7/f1p0/1578-1F	bZIP	TF
F01_cb8583_c8/f1p1/1457-1F	bZIP	TF
F01_cb8583_c9/f1p0/1418-1F	bZIP	TF
F01_cb9208_c1/f1p0/2177-2F	bZIP	TF
F01_cb9208_c10/f1p0/1940-2F	bZIP	TF
F01_cb9208_c11/f1p0/1552-1F	bZIP	TF
F01_cb9208_c2/f1p0/1797-0F	bZIP	TF
F01_cb9208_c3/f1p0/3305-1F	bZIP	TF
F01_cb9208_c4/f1p0/1968-2F	bZIP	TF
F01_cb9208_c6/f1p0/1749-2F	bZIP	TF
F01_cb9208_c8/f1p0/1835-2F	bZIP	TF
F01_cb9208_c9/f1p0/2253-2F	bZIP	TF
F01_cb9896_c2/f1p0/2082-0F	bZIP	TF
F01_cb9896_c3/f1p0/2041-2F	bZIP	TF
F01_cb9896_c4/f3p0/1910-2F	bZIP	TF
F02_cb10095_c0/f2p0/1341-0F	bZIP	TF
F02_cb10095_c1/f1p0/1993-0F	bZIP	TF
F02_cb10095_c2/f1p0/1565-0F	bZIP	TF
F02_cb10214_c1/f1p0/1975-1F	bZIP	TF
F02_cb10214_c2/f1p0/2085-1F	bZIP	TF
F02_cb10214_c3/f1p0/1838-2F	bZIP	TF
F02_cb10444_c0/f1p0/1939-1F	bZIP	TF
F02_cb10444_c1/f1p0/1628-0F	bZIP	TF
F02_cb10444_c3/f1p0/1711-0F	bZIP	TF
F02_cb10444_c4/f1p0/1587-1F	bZIP	TF
F02_cb10752_c1/f1p1/2285-0F	bZIP	TF
F02_cb11041_c19518/f1p0/3040-1F	bZIP	TF
F02_cb11041_c38170/f1p0/2679-0F	bZIP	TF
F02_cb11041_c5171/f1p0/3276-1F	bZIP	TF
F02_cb11041_c5174/f1p0/2471-2F	bZIP	TF
F02_cb11041_c5175/f1p1/2001-0F	bZIP	TF
F02_cb11041_c72259/f6p1/2537-1F	bZIP	TF
F02_cb11041_c74395/f2p0/1965-1F	bZIP	TF
F02_cb11768_c1/f1p0/1731-0F	bZIP	TF
F02_cb11768_c3/f1p0/1766-2F	bZIP	TF
F02_cb11768_c5/f1p0/802-2F	bZIP	TF
F02_cb11768_c7/f2p0/1651-1F	bZIP	TF
F02_cb11768_c8/f2p0/1649-0F	bZIP	TF
F02_cb11974_c0/f1p0/1696-0F	bZIP	TF
F02_cb11974_c1/f1p1/1587-0F	bZIP	TF
F02_cb11974_c2/f1p0/1400-0F	bZIP	TF
F02_cb11985_c1/f1p0/1691-0F	bZIP	TF
F02_cb11985_c2/f1p0/1547-0F	bZIP	TF
F02_cb11985_c3/f1p0/789-0F	bZIP	TF
F02_cb12126_c2/f1p1/1554-1F	bZIP	TF
F02_cb12126_c3/f1p0/1582-2F	bZIP	TF
F02_cb12206_c0/f1p0/1652-0F	bZIP	TF
F02_cb12206_c1/f1p0/1619-1F	bZIP	TF
F02_cb12206_c2/f1p0/1796-0F	bZIP	TF
F02_cb12206_c3/f1p0/1663-1F	bZIP	TF
F02_cb13635_c0/f1p1/1337-0F	bZIP	TF
F02_cb13635_c1/f1p0/1309-0F	bZIP	TF
F02_cb13635_c3/f1p0/1159-2F	bZIP	TF
F02_cb13763_c3/f1p0/1377-2F	bZIP	TF
F02_cb13763_c4/f1p0/978-0F	bZIP	TF
F02_cb14498_c1/f1p0/1360-0F	bZIP	TF
F02_cb14521_c1/f1p0/2108-1F	bZIP	TF
F02_cb14619_c0/f3p1/1222-0F	bZIP	TF
F02_cb17691_c0/f2p0/1142-2F	bZIP	TF
F02_cb17691_c2/f1p0/1103-0F	bZIP	TF
F02_cb18367_c0/f3p0/759-1F	bZIP	TF
F02_cb18467_c0/f1p0/887-2F	bZIP	TF
F02_cb18467_c1/f1p0/921-0F	bZIP	TF
F02_cb18467_c2/f1p0/966-1F	bZIP	TF
F02_cb18467_c3/f1p0/1005-1F	bZIP	TF
F02_cb18925_c0/f2p0/904-2F	bZIP	TF
F02_cb19230_c1/f1p0/1132-2F	bZIP	TF
F02_cb19276_c1/f1p0/1094-0F	bZIP	TF
F02_cb2175_c1/f1p0/3416-1F	bZIP	TF
F02_cb2175_c4/f1p0/1451-0F	bZIP	TF
F02_cb2613_c0/f2p0/2436-2F	bZIP	TF
F02_cb2613_c4/f1p0/2397-1F	bZIP	TF
F02_cb2613_c5/f1p0/2131-0F	bZIP	TF
F02_cb2634_c0/f5p0/1885-1F	bZIP	TF
F02_cb2634_c1/f2p0/1813-1F	bZIP	TF
F02_cb2634_c2/f1p0/3359-1F	bZIP	TF
F02_cb2634_c4/f1p0/2103-1F	bZIP	TF
F02_cb2634_c5/f1p0/1881-2F	bZIP	TF
F02_cb2995_c1/f1p0/3243-1F	bZIP	TF
F02_cb2995_c3/f1p0/1445-1F	bZIP	TF
F02_cb3436_c0/f18p1/2649-1F	bZIP	TF
F02_cb3436_c2/f3p1/3101-1F	bZIP	TF
F02_cb3436_c4/f1p0/2745-1F	bZIP	TF
F02_cb3436_c5/f1p1/2112-0F	bZIP	TF
F02_cb3436_c6/f1p0/2736-1F	bZIP	TF
F02_cb3953_c10/f1p0/1650-0F	bZIP	TF
F02_cb3953_c11/f1p0/1552-2F	bZIP	TF
F02_cb3953_c12/f1p0/1541-1F	bZIP	TF
F02_cb3953_c13/f1p0/1614-2F	bZIP	TF
F02_cb3953_c14/f1p0/1679-2F	bZIP	TF
F02_cb3953_c7/f1p0/1774-1F	bZIP	TF
F02_cb4088_c10/f1p1/2922-1F	bZIP	TF
F02_cb4088_c15/f1p1/2403-2F	bZIP	TF
F02_cb4088_c19/f1p1/2445-2F	bZIP	TF
F02_cb4088_c23/f5p1/2348-0F	bZIP	TF
F02_cb4088_c24/f6p1/2367-1F	bZIP	TF
F02_cb4088_c4/f4p1/2330-0F	bZIP	TF
F02_cb4088_c8/f1p1/2229-2F	bZIP	TF
F02_cb4088_c9/f1p0/2303-1F	bZIP	TF
F02_cb4773_c3/f1p0/1593-0F	bZIP	TF
F02_cb4773_c5/f1p1/1599-1F	bZIP	TF
F02_cb4773_c8/f1p0/1375-0F	bZIP	TF
F02_cb4773_c9/f1p0/1491-1F	bZIP	TF
F02_cb5263_c0/f2p0/1596-0F	bZIP	TF
F02_cb5263_c1/f1p0/2734-2F	bZIP	TF
F02_cb5451_c1/f1p0/2702-1F	bZIP	TF
F02_cb5451_c12/f1p0/1561-0F	bZIP	TF
F02_cb5451_c14/f1p0/1828-1F	bZIP	TF
F02_cb5451_c16/f1p0/2526-0F	bZIP	TF
F02_cb5451_c3/f1p0/2491-2F	bZIP	TF
F02_cb5451_c4/f1p0/2718-1F	bZIP	TF
F02_cb5451_c5/f1p0/2522-1F	bZIP	TF
F02_cb5451_c9/f1p0/2390-1F	bZIP	TF
F02_cb6537_c1/f2p0/2370-2F	bZIP	TF
F02_cb6537_c2/f2p1/1731-1F	bZIP	TF
F02_cb6537_c3/f2p0/1674-1F	bZIP	TF
F02_cb6537_c5/f1p0/1907-0F	bZIP	TF
F02_cb6537_c6/f1p0/1549-1F	bZIP	TF
F02_cb7318_c10/f1p0/2425-2F	bZIP	TF
F02_cb7318_c11/f1p0/2382-2F	bZIP	TF
F02_cb7318_c12/f1p0/2342-0F	bZIP	TF
F02_cb7318_c16/f1p0/1879-0F	bZIP	TF
F02_cb7318_c4/f2p0/2337-2F	bZIP	TF
F02_cb7449_c1/f1p0/2228-0F	bZIP	TF
F02_cb7449_c2/f1p0/1827-2F	bZIP	TF
F02_cb7449_c5/f1p0/1485-2F	bZIP	TF
F02_cb8133_c0/f5p0/2107-0F	bZIP	TF
F02_cb8133_c1/f1p0/2271-2F	bZIP	TF
F02_cb8133_c2/f1p0/2306-0F	bZIP	TF
F02_cb8543_c1/f1p0/2212-1F	bZIP	TF
F02_cb8543_c2/f1p0/1542-2F	bZIP	TF
F02_cb8543_c3/f1p1/1572-1F	bZIP	TF
F02_cb8677_c2/f1p0/1651-1F	bZIP	TF
F02_cb8677_c4/f1p0/860-2F	bZIP	TF
F02_cb8839_c0/f1p0/2172-0F	bZIP	TF
F02_cb8839_c1/f1p0/1711-2F	bZIP	TF
F02_cb9520_c0/f1p0/2074-2F	bZIP	TF
F01_cb1164_c10/f1p1/2704-1F	C2C2-CO-like	TF
F01_cb1164_c16/f1p0/1836-1F	C2C2-CO-like	TF
F01_cb1164_c21/f5p3/1797-1F	C2C2-CO-like	TF
F01_cb1164_c6/f3p2/1797-0F	C2C2-CO-like	TF
F01_cb12339_c4/f1p1/1606-0F	C2C2-CO-like	TF
F01_cb12339_c5/f1p0/1569-0F	C2C2-CO-like	TF
F01_cb13424_c0/f3p1/1316-2F	C2C2-CO-like	TF
F01_cb13424_c1/f2p1/1259-2F	C2C2-CO-like	TF
F01_cb16402_c0/f3p0/1351-1F	C2C2-CO-like	TF
F01_cb16402_c1/f3p0/1253-0F	C2C2-CO-like	TF
F01_cb16402_c5/f1p0/1359-2F	C2C2-CO-like	TF
F01_cb16813_c1/f2p1/1519-1F	C2C2-CO-like	TF
F01_cb16813_c2/f1p1/1549-0F	C2C2-CO-like	TF
F01_cb19471_c1/f2p0/1291-1F	C2C2-CO-like	TF
F01_cb19471_c6/f8p0/1493-0F	C2C2-CO-like	TF
F01_cb19786_c1/f1p0/1177-0F	C2C2-CO-like	TF
F01_cb20808_c0/f1p0/1522-1F	C2C2-CO-like	TF
F01_cb7377_c0/f3p0/2205-0F	C2C2-CO-like	TF
F01_cb7377_c15/f1p0/2062-0F	C2C2-CO-like	TF
F01_cb7377_c17/f1p0/2022-0F	C2C2-CO-like	TF
F01_cb7377_c2/f2p0/2272-2F	C2C2-CO-like	TF
F01_cb7377_c3/f1p0/2441-2F	C2C2-CO-like	TF
F01_cb7377_c5/f1p0/2116-1F	C2C2-CO-like	TF
F01_cb9778_c7/f1p0/1934-1F	C2C2-CO-like	TF
F02_cb10107_c0/f2p0/1983-0F	C2C2-CO-like	TF
F02_cb10107_c3/f1p0/1973-1F	C2C2-CO-like	TF
F02_cb10216_c1/f1p0/1300-1F	C2C2-CO-like	TF
F02_cb10216_c2/f1p0/1223-0F	C2C2-CO-like	TF
F02_cb10489_c21/f1p0/1601-2F	C2C2-CO-like	TF
F02_cb10489_c7/f3p0/1530-2F	C2C2-CO-like	TF
F02_cb12676_c0/f1p0/1567-2F	C2C2-CO-like	TF
F02_cb12676_c2/f1p0/1526-1F	C2C2-CO-like	TF
F02_cb13016_c0/f2p0/1498-2F	C2C2-CO-like	TF
F02_cb14335_c1/f1p0/1347-1F	C2C2-CO-like	TF
F02_cb14335_c2/f1p0/1201-1F	C2C2-CO-like	TF
F02_cb14477_c0/f1p0/1241-1F	C2C2-CO-like	TF
F02_cb14477_c1/f1p1/1431-2F	C2C2-CO-like	TF
F02_cb5173_c10/f1p1/1823-2F	C2C2-CO-like	TF
F02_cb5173_c11/f1p3/1801-2F	C2C2-CO-like	TF
F02_cb5173_c13/f1p2/1729-0F	C2C2-CO-like	TF
F02_cb5173_c14/f1p0/1650-2F	C2C2-CO-like	TF
F02_cb5173_c17/f1p0/1831-1F	C2C2-CO-like	TF
F02_cb5173_c7/f1p0/2755-2F	C2C2-CO-like	TF
F02_cb5173_c9/f1p0/1845-1F	C2C2-CO-like	TF
F02_cb7491_c1/f1p0/2364-0F	C2C2-CO-like	TF
F02_cb7491_c10/f1p0/2254-0F	C2C2-CO-like	TF
F02_cb7491_c14/f1p1/2256-1F	C2C2-CO-like	TF
F02_cb7491_c2/f1p1/2041-2F	C2C2-CO-like	TF
F02_cb7491_c7/f1p1/2387-0F	C2C2-CO-like	TF
F01_cb10808_c1/f1p1/1955-1F	C2C2-Dof	TF
F01_cb10808_c6/f1p0/1875-2F	C2C2-Dof	TF
F01_cb10808_c7/f2p0/1847-2F	C2C2-Dof	TF
F01_cb11615_c0/f2p1/1850-0F	C2C2-Dof	TF
F01_cb12730_c0/f1p0/1668-1F	C2C2-Dof	TF
F01_cb12730_c1/f1p0/1673-0F	C2C2-Dof	TF
F01_cb12730_c2/f1p0/1655-1F	C2C2-Dof	TF
F01_cb13548_c3/f1p0/1526-0F	C2C2-Dof	TF
F01_cb13548_c5/f1p0/1474-2F	C2C2-Dof	TF
F01_cb14010_c1/f1p1/1930-2F	C2C2-Dof	TF
F01_cb14010_c2/f1p0/930-0F	C2C2-Dof	TF
F01_cb14498_c0/f1p0/1154-0F	C2C2-Dof	TF
F01_cb14498_c1/f1p0/1850-1F	C2C2-Dof	TF
F01_cb14498_c2/f1p0/1129-0F	C2C2-Dof	TF
F01_cb14498_c3/f1p0/1115-2F	C2C2-Dof	TF
F01_cb15597_c0/f1p0/1103-1F	C2C2-Dof	TF
F01_cb15597_c1/f1p0/1050-2F	C2C2-Dof	TF
F01_cb16121_c1/f1p0/842-1F	C2C2-Dof	TF
F01_cb16121_c2/f1p0/959-1F	C2C2-Dof	TF
F01_cb17136_c1/f1p0/1185-0F	C2C2-Dof	TF
F01_cb17136_c3/f1p0/1169-2F	C2C2-Dof	TF
F01_cb17136_c4/f1p0/1245-1F	C2C2-Dof	TF
F01_cb17451_c0/f1p0/1334-1F	C2C2-Dof	TF
F01_cb17451_c1/f1p0/1420-2F	C2C2-Dof	TF
F01_cb17451_c3/f1p0/1166-2F	C2C2-Dof	TF
F01_cb18882_c0/f1p0/1463-1F	C2C2-Dof	TF
F01_cb18882_c3/f1p0/983-0F	C2C2-Dof	TF
F01_cb18882_c4/f1p0/1241-2F	C2C2-Dof	TF
F01_cb19058_c0/f2p0/760-0F	C2C2-Dof	TF
F01_cb19058_c1/f1p0/496-1F	C2C2-Dof	TF
F01_cb19058_c2/f1p0/600-2F	C2C2-Dof	TF
F01_cb20508_c0/f1p0/715-1F	C2C2-Dof	TF
F01_cb21209_c0/f2p0/1415-0F	C2C2-Dof	TF
F01_cb21357_c0/f1p0/1367-2F	C2C2-Dof	TF
F01_cb21357_c3/f1p0/1231-0F	C2C2-Dof	TF
F01_cb21357_c5/f1p0/1098-2F	C2C2-Dof	TF
F01_cb21877_c0/f1p0/908-1F	C2C2-Dof	TF
F01_cb21877_c1/f1p0/856-2F	C2C2-Dof	TF
F01_cb8552_c0/f6p1/2021-2F	C2C2-Dof	TF
F01_cb8552_c1/f2p0/1987-0F	C2C2-Dof	TF
F01_cb8552_c2/f2p0/1966-1F	C2C2-Dof	TF
F01_cb9818_c2/f1p0/2095-1F	C2C2-Dof	TF
F01_cb9818_c4/f1p1/2145-2F	C2C2-Dof	TF
F02_cb11252_c0/f1p0/1816-2F	C2C2-Dof	TF
F02_cb11252_c1/f1p0/1864-0F	C2C2-Dof	TF
F02_cb11361_c0/f1p0/1800-0F	C2C2-Dof	TF
F02_cb11361_c2/f1p0/1268-0F	C2C2-Dof	TF
F02_cb11361_c3/f1p0/1144-0F	C2C2-Dof	TF
F02_cb11361_c4/f1p0/1094-1F	C2C2-Dof	TF
F02_cb11361_c5/f1p0/1086-1F	C2C2-Dof	TF
F02_cb11952_c2/f1p0/1401-1F	C2C2-Dof	TF
F02_cb12610_c0/f2p0/1368-1F	C2C2-Dof	TF
F02_cb12610_c1/f1p0/1579-0F	C2C2-Dof	TF
[truncated: 15,367 more rows]
