# Supplementary material for: SMRT sequencing of full-length transcriptome and gene expression analysis in two chemical types of Pogostemon cablin (Blanco) Benth
Source: PeerJ. 2022 Feb 22;10:e12940. doi: 10.7717/peerj.12940 (PMC8877398; doi:10.7717/peerj.12940)
Supplement: Supplemental Information 6 [file peerj-10-12940-s006.xlsx]

## Sheet: Sample type
Sample number	Sample type
T01_T02_T03	root of the pogostone-type
T04_T05_T06	stem of the pogostone-type
T07_T08_T09	leaf of the pogostone-type
T10_T11_T18	root of the patchouliol-type
T12_T13_T14	stem of the patchouliol-type
T15_T16_T17	leaf of the patchouliol-type

## Sheet: T01_T02_T03_vs_T10_T11_T18.DEG_
#ID	T01_Count	T02_Count	T03_Count	T10_Count	T11_Count	T18_Count	T01_FPKM	T02_FPKM	T03_FPKM	T10_FPKM	T11_FPKM	T18_FPKM	FDR	log2FC	regulated
F01_cb10099_c10/f1p0/1546	0	0	0	27	53	31	0	0	0	1.63	3.5	1.66	0.000119616	Inf	up
F01_cb10172_c18/f1p0/1498	113	163	96	478	312	454	6.2	9.12	6.58	29.88	21.13	24.85	0.0484835	1.88411	up
F01_cb10205_c5/f1p0/1933	173	243	151	6	7	2	7	9.93	7.63	0.31	0.39	0.11	2.48509e-10	-5.00464	down
F01_cb10254_c3/f1p0/976	100	94	81	0	0	1	9.81	9.48	9.8	0	0	0.1	2.11369e-10	-8.11591	down
F01_cb10284_c7/f1p0/2028	39	37	57	0	5	6	1.54	1.49	2.8	0	0.27	0.24	0.00218224	-3.45127	down
F01_cb10307_c6/f1p0/1642	49	33	32	2	0	0	2.45	1.69	2.01	0.14	0	0	1.30943e-05	-5.84022	down
F01_cb10529_c86/f1p1/3014	312	356	205	99	21	90	7.67	8.78	6.26	2.77	0.66	2.2	0.0348048	-1.98111	down
F01_cb10542_c11/f1p0/1831	203	189	137	1	0	0	8.79	8.27	7.4	0.06	0	0	1.28534e-15	-9.03545	down
F01_cb10567_c3/f1p0/1593	116	81	29	11	0	4	5.94	4.22	1.86	0.66	0	0.24	0.0113571	-3.85453	down
F01_cb10587_c2/f2p1/1991	290	850	254	5	4	0	11.36	33.63	12.37	0.22	0.19	0	6.96081e-06	-6.98551	down
F01_cb10587_c5/f1p0/1051	256	370	179	3	0	0	22.13	32.82	19.25	0.3	0	0	1.0508e-17	-8.02558	down
F01_cb10614_c1/f1p1/1983	60	33	52	0	0	0	2.37	1.35	2.56	0	0	0	3.46089e-08	#NAME?	down
F01_cb10683_c0/f2p0/1909	60	65	112	0	0	0	2.48	2.71	5.77	0	0	0	7.41931e-06	#NAME?	down
F01_cb10693_c27/f1p0/4396	21	36	42	0	0	6	0.37	0.65	0.94	0	0	0.11	0.00277447	-4.10033	down
F01_cb10699_c6/f1p0/1295	405	274	282	1	3	0	26.65	18.38	23.11	0.07	0.24	0	2.09932e-18	-7.58812	down
F01_cb10706_c5/f1p1/1739	227	113	185	13	42	30	10.43	5.26	10.58	0.69	2.42	1.37	0.00855496	-2.44663	down
F01_cb10718_c2/f1p0/1974	63	68	72	8	0	0	2.5	2.73	3.56	0.4	0	0	1.10798e-05	-4.69222	down
F01_cb10741_c1/f1p0/1890	23	60	45	0	0	0	1	2.59	2.4	0	0	0	1.32057e-07	#NAME?	down
F01_cb10777_c3/f1p2/1775	42	53	41	0	7	11	1.91	2.43	2.3	0	0.4	0.53	0.0233233	-2.73873	down
F01_cb10918_c7/f5p1/1956	80	102	89	3	0	8	3.21	4.14	4.45	0.18	0	0.33	2.78753e-06	-4.63976	down
F01_cb10921_c2/f1p0/1733	85	77	54	1	1	1	3.87	3.55	3.06	0.05	0.06	0.05	8.58479e-08	-6.00011	down
F01_cb1094_c12/f1p4/1988	20	35	38	0	4	0	0.82	1.4	1.86	0	0.24	0	0.000582791	-4.15002	down
F01_cb10974_c8/f1p3/1848	197	64	78	354	537	525	8.41	2.79	4.14	17.1	28.16	22.21	0.00923212	2.23246	up
F01_cb11075_c5/f1p0/5767	94	147	111	0	0	0	1.15	1.8	1.7	0	0	0	3.65976e-13	#NAME?	down
F01_cb1107_c1/f6p4/3492	42	130	36	5	0	0	0.88	2.74	0.95	0.12	0	0	0.00527175	-5.28918	down
F01_cb11085_c1/f1p0/1977	21	23	25	123	124	102	0.86	0.93	1.27	5.51	6.06	4	0.00606943	2.47374	up
F01_cb11089_c50/f1p2/1229	0	0	0	418	174	67	0	0	0	33.48	15.07	4.74	9.5825e-05	Inf	up
F01_cb11104_c15/f1p0/1171	116	133	106	465	388	434	8.72	10.24	9.92	39.74	35.74	32.54	0.0267617	1.99857	up
F01_cb11173_c4/f4p0/1867	153	194	87	46	19	31	6.45	8.3	4.58	2.21	1.01	1.34	0.0440596	-2.03513	down
F01_cb11455_c7/f1p0/2557	21	40	16	3	0	0	0.64	1.2	0.59	0.1	0	0	0.00122225	-4.62393	down
F01_cb11541_c2/f1p0/1855	28	68	24	11	0	0	1.21	2.92	1.31	0.55	0	0	0.0104398	-3.37857	down
F01_cb11551_c1/f2p0/2063	315	488	320	64	64	64	11.84	18.53	14.96	2.76	2.96	2.38	0.0017041	-2.37854	down
F01_cb11692_c1/f1p0/1836	54	44	43	0	0	2	2.49	2.05	2.46	0	0	0.11	1.76404e-06	-6.16078	down
F01_cb11761_c3/f1p1/1827	92	164	54	0	0	2	4.01	7.19	2.94	0	0	0.09	5.4137e-10	-7.21239	down
F01_cb11811_c3/f1p0/1576	370	156	148	20	18	2	19.13	8.2	9.51	1.18	1.18	0.11	0.00405221	-3.86053	down
F01_cb11908_c1/f4p1/1730	73	143	72	2	4	5	3.39	6.71	4.16	0.15	0.26	0.26	1.47929e-06	-4.50494	down
F01_cb1190_c0/f1p0/3904	338	475	1412	0	0	1	6.28	8.84	32.57	0	0	0.02	0.00527175	-11.2707	down
F01_cb1190_c2/f1p1/3889	224	371	845	0	0	0	4.18	6.93	19.57	0	0	0	0.000548681	#NAME?	down
F01_cb1190_c3/f1p0/4111	90	354	514	0	0	0	1.69	6.65	11.97	0	0	0	0.000385445	#NAME?	down
F01_cb1190_c4/f1p0/1543	84	95	233	0	0	0	4.46	5.12	15.37	0	0	0	0.00159901	#NAME?	down
F01_cb1190_c5/f1p0/5667	611	971	2754	0	0	1	7.77	12.35	43.59	0	0	0.01	0.00218257	-12.2319	down
F01_cb1194_c4/f1p1/2259	33	60	28	11	3	3	1.14	2.07	1.2	0.44	0.15	0.12	0.0409419	-2.70237	down
F01_cb12163_c5/f1p0/1883	147	220	104	1	1	2	6.14	9.29	5.4	0.05	0.05	0.08	1.5843e-12	-6.71971	down
F01_cb12263_c0/f1p0/1748	0	0	0	163	36	100	0	0	0	8.45	2.02	4.55	1.28448e-06	Inf	up
F01_cb12263_c1/f1p0/1873	0	0	0	157	26	114	0	0	0	7.52	1.38	4.76	1.30943e-05	Inf	up
F01_cb12274_c38/f1p1/3068	63	97	98	1	5	3	1.54	2.37	2.96	0.04	0.15	0.09	1.49154e-06	-4.61941	down
F01_cb12367_c2/f2p0/1731	317	303	181	33	45	52	14.62	14.19	10.43	1.73	2.55	2.39	0.00117044	-2.43571	down
F01_cb12407_c1/f1p0/1722	502	320	518	99	48	80	23.24	15.02	29.79	5.24	2.74	3.72	0.00398049	-2.51586	down
F01_cb12463_c6/f5p0/1716	66	88	56	16	11	6	3.11	4.2	3.27	0.85	0.65	0.29	0.0270602	-2.49478	down
F01_cb12472_c1/f1p1/1805	101	127	80	577	318	299	4.47	5.69	4.4	29	17.32	13.15	0.0138393	2.10046	up
F01_cb12478_c1/f2p0/1409	21	61	34	1	2	5	1.24	3.72	2.5	0.07	0.15	0.29	0.00164732	-3.71654	down
F01_cb12506_c7/f1p0/1626	114	96	42	30	6	8	5.78	4.94	2.7	1.75	0.42	0.44	0.0357649	-2.40258	down
F01_cb1256_c8/f1p0/2562	0	18	0	44	28	31	0	0.55	0	1.48	1.02	0.9	0.048017	2.87209	up
F01_cb12589_c0/f4p0/1140	333	40	634	0	0	0	25.89	3.18	61.05	0	0	0	0.0110638	#NAME?	down
F01_cb12589_c1/f4p0/1309	448	228	1027	0	0	0	29.09	15.1	82.82	0	0	0	0.000846706	#NAME?	down
F01_cb12589_c2/f2p0/1048	322	302	991	0	0	1	27.98	26.95	106.7	0	0	0.09	0.00324266	-10.8053	down
F01_cb12589_c3/f2p0/1679	685	311	1560	0	2	0	32.76	15.1	92.75	0	0.12	0	0.00292784	-10.0387	down
F01_cb12589_c4/f1p0/739	146	313	749	0	0	0	21.19	47.29	133.67	0	0	0	0.00405938	#NAME?	down
F01_cb12595_c9/f1p0/1636	46	36	44	0	0	3	2.28	1.83	2.74	0	0	0.19	1.63532e-05	-5.43375	down
F01_cb12685_c132/f1p0/3004	1326	206	492	0	7	0	35.02	5.49	16.19	0	0.25	0	0.00354512	-7.77063	down
F01_cb12685_c145/f1p4/3147	780	821	648	180	48	140	18.26	19.32	18.89	4.8	1.39	3.25	0.0030868	-2.54877	down
F01_cb12731_c2/f1p0/1931	35	62	27	3	0	0	1.42	2.57	1.36	0.17	0	0	2.16216e-05	-5.31841	down
F01_cb12905_c2/f1p0/1516	66	45	64	2	11	4	3.57	2.48	4.36	0.12	0.73	0.22	0.00242649	-3.11702	down
F01_cb13044_c306/f1p0/1248	88	44	132	0	0	0	6.09	3.13	11.3	0	0	0	0.000201378	#NAME?	down
F01_cb13044_c321/f1p0/1548	85	152	115	0	0	0	4.53	8.18	7.59	0	0	0	3.63791e-13	#NAME?	down
F01_cb13044_c614/f1p0/1078	17	20	16	0	0	0	1.48	1.71	1.71	0	0	0	0.000298823	#NAME?	down
F01_cb13050_c10/f1p0/1283	52	74	43	0	0	0	3.5	5.07	3.58	0	0	0	7.83066e-09	#NAME?	down
F01_cb13050_c8/f2p0/471	46	70	65	0	0	0	15.8	26.65	27.04	0	0	0	3.5336e-09	#NAME?	down
F01_cb13069_c21/f1p0/1236	6517	4971	3853	219	351	458	544.93	426.29	399.72	20.91	36.16	38.38	0.0291353	-3.73265	down
F01_cb13069_c59/f1p1/1061	0	7	4	958	1787	1394	0	0.67	0.43	93.29	187.56	119.15	1.83725e-11	8.77263	up
F01_cb13069_c60/f64p2/1135	44	36	18	1	2	4	3.44	2.94	1.8	0.11	0.23	0.38	0.00352826	-3.63431	down
F01_cb13090_c18/f1p0/526	24	34	0	139	138	93	8.49	13.5	0	57.93	59.77	34.91	0.000900253	2.99821	up
F01_cb13141_c2/f1p0/1970	48	28	22	0	0	0	1.92	1.15	1.12	0	0	0	1.81792e-06	#NAME?	down
F01_cb13141_c7/f4p0/640	67	99	79	2	0	0	12.35	19.28	17.86	0.42	0	0	4.94951e-09	-6.94071	down
F01_cb13169_c5/f1p1/807	104	85	102	0	2	0	13.09	11.15	15.97	0	0.31	0	4.08481e-10	-6.78827	down
F01_cb13383_c15/f1p0/904	87	24	88	0	0	0	9.45	2.72	11.91	0	0	0	0.000242651	#NAME?	down
F01_cb13515_c14/f6p1/1245	26	55	47	0	0	0	1.8	3.9	4.06	0	0	0	1.29178e-07	#NAME?	down
F01_cb13543_c5/f1p0/1049	40	51	35	2	3	0	3.47	4.55	3.79	0.21	0.37	0	0.000109563	-4.37064	down
F01_cb13594_c1/f1p1/1272	332	232	158	54	0	0	22.45	16.04	13.33	4.2	0	0	7.48314e-07	-3.72028	down
F01_cb1366_c10/f1p1/3459	561	657	301	120	119	106	11.85	13.93	7.93	2.87	3.11	2.23	0.0274039	-1.93119	down
F01_cb13704_c1/f1p0/897	114	79	57	9	7	1	12.32	8.87	7.7	1.23	1.03	0.12	0.000102635	-3.67015	down
F01_cb13784_c6/f1p1/1433	21	45	14	0	3	3	1.26	2.69	1.01	0	0.27	0.19	0.00883169	-3.43255	down
F01_cb13837_c0/f5p0/814	181	196	113	0	0	0	22.49	25.32	17.37	0	0	0	6.19608e-16	#NAME?	down
F01_cb13866_c6/f3p0/1596	101	120	85	32	21	0	5.17	6.23	5.39	1.9	1.34	0	0.0186993	-2.33363	down
F01_cb13925_c4/f1p0/1452	21	0	0	45	31	39	1.2	0	0	2.97	2.18	2.27	0.0481245	2.62877	up
F01_cb13992_c0/f1p0/1312	8	13	10	82	67	66	0.52	0.86	0.8	6.06	5.33	4.26	0.00369452	2.93772	up
F01_cb14162_c1/f1p0/2201	153	107	61	36	4	6	5.34	3.76	2.65	1.42	0.17	0.21	0.00511333	-2.72774	down
F01_cb14208_c5/f1p0/1011	36	45	19	0	0	10	3.3	4.28	2.15	0	0	0.97	0.0139099	-3.27765	down
F01_cb14257_c26/f1p0/1393	61	100	90	31	6	8	3.72	6.12	6.75	2.17	0.46	0.49	0.0385808	-2.43422	down
F01_cb1434_c10/f3p0/1848	62	70	63	24	0	8	2.66	3.06	3.35	1.17	0	0.36	0.0391689	-2.62108	down
F01_cb14586_c2/f1p0/884	65	48	52	8	1	3	7.19	5.58	7.21	1.05	0.21	0.35	0.000629588	-3.76208	down
F01_cb1460_c6/f1p1/3054	88	53	63	21	0	0	2.22	1.36	1.98	0.6	0	0	0.00241464	-3.30243	down
F01_cb14698_c1/f1p0/1790	0	0	1	23	35	79	0	0	0.06	1.17	1.92	3.53	0.00016091	6.92792	up
F01_cb147_c6/f1p1/4815	48	38	42	4	6	0	0.75	0.59	0.81	0.07	0.13	0	0.00193969	-3.42922	down
F01_cb1497_c22/f1p0/3457	41	67	52	0	0	0	0.89	1.44	1.4	0	0	0	1.31837e-08	#NAME?	down
F01_cb15042_c7/f1p0/1225	19	41	37	0	0	0	1.35	3.03	3.27	0	0	0	1.87112e-06	#NAME?	down
F01_cb15069_c105/f1p0/561	1221	491	1128	3	1	4	314.22	137.59	356.28	0.92	0.4	1.17	4.7062e-09	-8.48217	down
F01_cb15069_c123/f1p0/678	3236	3155	3462	0	0	0	729.47	765.68	959.93	0	0	0	6.594e-18	#NAME?	down
F01_cb15069_c69/f1p0/626	1856	1545	739	45	47	50	338.14	298.65	166.12	9.52	10.55	9.38	1.54842e-08	-4.66749	down
F01_cb15075_c4/f1p0/889	0	0	12	104	116	175	0	0	1.64	13.12	15.64	19.27	1.50246e-09	4.88916	up
F01_cb15118_c0/f6p1/1100	78	52	72	8	0	0	6.38	4.39	7.31	0.74	0	0	1.13458e-05	-4.69802	down
F01_cb15269_c11/f1p0/467	36	26	21	0	1	2	12.68	10.39	9.09	0	0.45	0.74	0.000633216	-4.63104	down
F01_cb15344_c0/f24p1/316	528	278	930	0	1	0	600.48	385.15	1298.95	0	1.4	0	4.51588e-05	-10.4498	down
F01_cb15344_c1/f13p0/326	266	243	400	0	0	1	268.99	297.58	493.75	0	0	1.24	3.70568e-10	-9.90466	down
F01_cb15344_c3/f2p0/315	134	46	228	0	0	0	155	64.5	323.63	0	0	0	0.00249297	#NAME?	down
F01_cb15344_c4/f1p0/328	218	57	551	0	0	0	295.96	95.94	933.2	0	0	0	0.0276366	#NAME?	down
F01_cb15430_c32/f1p1/1505	2373	1806	1436	3	2	0	138.86	107.5	104.41	0.21	0.21	0	5.81707e-19	-9.93902	down
F01_cb15511_c11/f2p0/1172	41	21	15	0	0	0	3.13	1.64	1.43	0	0	0	5.96434e-05	#NAME?	down
F01_cb15511_c5/f1p0/1092	45	62	41	1	0	0	3.86	5.48	4.34	0.14	0	0	2.4708e-07	-7.19437	down
F01_cb15536_c1/f1p0/644	30	69	800	2071	1064	3324	5.44	13.41	178.9	432.7	236.72	614.85	0.0101166	2.67692	up
F01_cb15545_c21/f1p12/1345	0	0	0	93	29	172	0	0	0	6.64	2.25	10.79	7.72568e-05	Inf	up
F01_cb15545_c23/f1p8/1416	213	243	420	0	0	3	13.11	15.2	32.07	0	0	0.21	2.99924e-06	-8.27855	down
F01_cb15634_c18/f1p0/940	474	526	339	0	2	0	55.87	64.31	49.47	0	0.29	0	1.4092e-21	-8.93847	down
F01_cb15736_c48/f10p1/1183	2622	1975	3563	21	34	8	193.76	149.14	326.78	1.77	3.15	0.66	1.25872e-08	-6.84149	down
F01_cb1575_c32/f1p0/1099	114	121	50	12	6	18	9.33	10.13	5.14	1.2	0.67	1.49	0.00349116	-2.85385	down
F01_cb15764_c0/f2p0/1186	666	203	1287	0	0	0	49.04	15.28	117.63	0	0	0	0.000664227	#NAME?	down
F01_cb15850_c7/f1p0/1654	821	1679	724	21	26	19	43.63	90.6	47.88	1.27	1.74	1.04	1.0072e-11	-5.37631	down
F01_cb16298_c0/f1p0/1027	59	61	49	3	2	9	5.29	5.57	5.47	0.3	0.22	0.8	0.00120154	-3.52836	down
F01_cb16344_c0/f1p1/1251	34	107	33	0	0	0	2.37	7.52	2.86	0	0	0	6.46408e-05	#NAME?	down
F01_cb16344_c1/f1p0/1115	117	43	86	13	8	12	9.33	3.53	8.57	1.25	0.86	1.03	0.0393902	-2.83516	down
F01_cb16428_c12/f1p0/1063	84	177	136	5	17	32	7.23	15.47	14.45	0.54	1.82	2.81	0.00149206	-2.73822	down
F01_cb16428_c5/f2p0/779	1457	2130	1142	15	63	118	212.48	325.34	205.85	2.61	11.38	17.53	2.79761e-07	-4.41157	down
F01_cb16438_c10297/f1p1/2735	179	90	79	1	3	0	4.91	2.5	2.71	0.04	0.12	0	2.00933e-07	-6.10261	down
F01_cb16438_c10372/f1p0/3079	116	120	59	205	294	475	2.93	3.05	1.85	5.86	9.11	11.85	0.0472302	1.90466	up
F01_cb16438_c10442/f1p1/2786	26	121	60	0	0	0	0.81	3.78	2.3	0	0	0	4.35103e-05	#NAME?	down
F01_cb16438_c10787/f1p1/2890	92	144	104	0	0	0	2.39	3.72	3.33	0	0	0	7.19084e-13	#NAME?	down
F01_cb16438_c10960/f1p2/2696	5877	5424	4331	2	8	6	163.09	151.47	149.61	0.07	0.27	0.16	4.4435e-10	-9.70139	down
F01_cb16438_c10968/f2p0/2527	388	608	417	26	27	15	11.59	18.28	15.49	0.88	1.01	0.45	2.54948e-09	-4.18274	down
F01_cb16438_c11114/f1p0/2160	95	23	50	0	0	0	3.6	0.89	2.35	0	0	0	0.000332703	#NAME?	down
F01_cb16438_c11202/f1p0/2358	5217	913	5336	1	17	1	168.25	29.68	214.13	0.04	0.68	0.03	4.56259e-05	-8.95356	down
F01_cb16438_c11296/f1p1/4327	419	850	245	2	6	1	6.92	14.08	5.04	0.04	0.12	0.02	5.6014e-09	-7.0127	down
F01_cb16438_c11407/f1p0/1895	0	0	0	51	48	61	0	0	0	2.42	2.45	2.53	2.36656e-09	Inf	up
F01_cb16438_c11689/f1p0/3146	2400	3281	2027	228	131	564	65.02	89.43	68.39	7.02	4.39	15.15	0.0183553	-2.9764	down
F01_cb16438_c11844/f1p0/2814	7	0	0	21	21	43	0.19	0	0	0.63	0.7	1.13	0.00281493	3.76596	up
F01_cb16438_c12239/f1p0/3628	39	80	48	0	0	0	0.81	1.67	1.26	0	0	0	8.75671e-09	#NAME?	down
F01_cb16438_c12321/f1p0/1847	104	260	15	0	0	0	4.45	11.28	0.82	0	0	0	0.0135336	#NAME?	down
F01_cb16438_c12371/f1p5/2083	32	35	21	0	0	0	1.21	1.31	0.97	0	0	0	4.95182e-06	#NAME?	down
F01_cb16438_c12938/f1p0/2553	163	239	159	1	0	0	4.79	7.06	5.82	0.03	0	0	4.06459e-16	-9.11798	down
F01_cb16438_c13243/f1p0/1681	117	187	131	0	0	0	5.59	9.08	7.78	0	0	0	5.68451e-15	#NAME?	down
F01_cb16438_c13245/f1p0/2148	212	232	211	0	0	0	7.61	8.43	9.44	0	0	0	1.15371e-18	#NAME?	down
F01_cb16438_c13387/f1p0/3648	138	58	63	0	0	0	2.81	1.19	1.6	0	0	0	2.47587e-07	#NAME?	down
F01_cb16438_c13405/f1p0/1648	4788	10573	2664	9	4	1	234.12	523.98	161.96	0.52	0.28	0.05	7.48843e-10	-10.1023	down
F01_cb16438_c14050/f1p0/1820	28	44	31	0	3	5	1.22	1.95	1.7	0	0.17	0.24	0.00405621	-3.50766	down
F01_cb16438_c14751/f1p0/1647	44	20	79	0	0	0	2.17	1	4.81	0	0	0	0.0119386	#NAME?	down
F01_cb16438_c14898/f1p0/2931	557	671	542	0	0	41	15.48	18.77	18.74	0	0	1.13	1.1962e-12	-5.44284	down
F01_cb16438_c15771/f1p0/2554	35	71	32	2	0	0	1.03	2.14	1.2	0.08	0	0	2.38465e-06	-6.06064	down
F01_cb16438_c15892/f1p3/3665	86	123	54	0	0	0	1.74	2.52	1.37	0	0	0	5.32481e-11	#NAME?	down
F01_cb16438_c15900/f1p0/3685	58	117	31	0	0	0	1.15	2.32	0.78	0	0	0	7.56905e-07	#NAME?	down
F01_cb16438_c16327/f1p0/2469	106	33	154	0	0	0	3.3	1.03	5.96	0	0	0	0.00159747	#NAME?	down
F01_cb16438_c16714/f1p0/1868	131	118	87	27	26	6	5.74	5.21	4.75	1.36	1.42	0.27	0.0155537	-2.29494	down
F01_cb16438_c17702/f1p0/3553	107	107	97	6	3	8	2.2	2.2	2.48	0.14	0.08	0.16	7.22943e-06	-4.12154	down
F01_cb16438_c1903/f1p0/3295	61	70	59	6	1	9	1.43	1.66	1.74	0.18	0.04	0.22	0.000947372	-3.54924	down
F01_cb16438_c19052/f1p0/2829	37	20	44	0	0	0	1	0.55	1.46	0	0	0	5.18707e-05	#NAME?	down
F01_cb16438_c19061/f3p0/2346	154	52	126	13	11	12	5.02	1.73	5.09	0.51	0.45	0.4	0.0424871	-3.12646	down
F01_cb16438_c19167/f1p0/3116	109	189	136	37	14	37	2.57	4.46	3.97	0.99	0.4	0.87	0.0229006	-2.22389	down
F01_cb16438_c1918/f1p0/2280	19	40	28	0	0	0	0.68	1.41	1.23	0	0	0	5.30114e-06	#NAME?	down
F01_cb16438_c1924/f1p0/1632	0	2	0	215	321	230	0	0.1	0	12.08	19.54	11.31	4.59758e-12	9.0025	up
F01_cb16438_c19446/f2p1/3955	130	141	140	23	0	0	2.39	2.61	3.22	0.48	0	0	1.20907e-06	-4.17995	down
F01_cb16438_c19572/f2p0/1964	377	456	487	1	0	0	14.99	18.32	24.08	0.05	0	0	2.36228e-22	-10.3967	down
F01_cb16438_c19823/f1p0/3311	197	283	197	17	1	15	4.56	6.56	5.68	0.46	0.05	0.35	1.39708e-08	-4.3377	down
F01_cb16438_c19930/f3p0/3479	83	34	51	0	0	0	1.8	0.75	1.38	0	0	0	2.3417e-07	#NAME?	down
F01_cb16438_c19976/f1p0/2390	63	43	40	0	0	0	2.01	1.38	1.59	0	0	0	3.47969e-08	#NAME?	down
F01_cb16438_c20734/f1p1/3701	68	129	119	0	0	0	1.38	2.64	3.01	0	0	0	2.73619e-12	#NAME?	down
F01_cb16438_c20753/f1p0/1927	51	74	34	0	0	0	2.11	3.05	1.74	0	0	0	1.54842e-08	#NAME?	down
F01_cb16438_c20907/f1p0/3228	413	501	425	0	0	0	9.54	11.64	12.23	0	0	0	1.66465e-23	#NAME?	down
F01_cb16438_c20978/f1p1/3806	24	31	20	6	0	1	0.47	0.6	0.49	0.14	0	0.03	0.0233698	-3.40469	down
F01_cb16438_c21191/f1p0/4047	0	0	0	62	29	126	0	0	0	1.33	0.67	2.33	2.16216e-05	Inf	up
F01_cb16438_c21193/f1p0/2451	66	21	46	1	0	0	2.27	0.75	1.96	0.04	0	0	0.000156674	-7.10698	down
F01_cb16438_c21225/f1p0/3208	196	178	258	5	15	37	5.15	4.72	8.43	0.17	0.5	0.98	0.00012738	-3.4047	down
F01_cb16438_c21267/f1p7/3667	53	22	40	0	0	0	1.07	0.46	1.02	0	0	0	2.0154e-06	#NAME?	down
F01_cb16438_c21463/f1p0/3831	17	32	13	6	0	0	0.33	0.61	0.32	0.15	0	0	0.0470433	-3.31262	down
F01_cb16438_c22819/f1p0/3471	29	42	24	1	0	0	0.62	0.9	0.64	0.02	0	0	1.74605e-05	-6.54186	down
F01_cb16438_c23281/f1p0/2021	41	54	42	0	0	0	1.6	2.1	2.02	0	0	0	6.8035e-08	#NAME?	down
F01_cb16438_c23479/f1p0/4135	74	93	70	0	2	0	1.3	1.63	1.53	0	0.05	0	7.53214e-09	-6.45596	down
F01_cb16438_c23649/f1p1/2077	45	37	48	0	0	0	1.68	1.39	2.23	0	0	0	1.06768e-07	#NAME?	down
F01_cb16438_c23739/f1p0/1753	1542	884	1098	29	9	23	70.07	40.7	62.07	1.54	0.55	1.05	6.63995e-12	-5.80826	down
F01_cb16438_c2390/f1p1/3468	763	519	329	100	136	57	16.68	11.41	8.97	2.48	3.67	1.25	0.00432246	-2.21922	down
F01_cb16438_c24044/f1p0/2981	43	84	38	11	0	13	1.17	2.3	1.29	0.37	0	0.36	0.0281074	-2.73848	down
F01_cb16438_c24061/f1p3/2252	27	99	19	0	1	0	0.94	3.38	0.8	0	0.04	0	0.0301601	-6.63513	down
F01_cb16438_c24100/f2p0/2269	3338	806	4843	1	6	1	112.44	27.4	203	0.04	0.27	0.03	0.000144807	-9.9302	down
F01_cb16438_c2424/f1p0/3412	257	142	134	0	0	0	5.51	3.06	3.6	0	0	0	8.37465e-15	#NAME?	down
F01_cb16438_c24668/f1p0/4007	735	931	583	1	4	0	14.76	18.77	14.58	0.03	0.12	0	4.30911e-21	-8.43961	down
F01_cb16438_c24739/f1p0/3062	185	47	44	0	0	0	4.46	1.14	1.32	0	0	0	0.00908773	#NAME?	down
F01_cb16438_c24821/f1p0/4015	52	44	57	0	1	6	0.93	0.81	1.28	0	0.03	0.11	7.83855e-05	-4.4283	down
F01_cb16438_c2576/f1p0/2912	16	15	15	0	2	1	0.41	0.4	0.5	0	0.06	0.03	0.0360718	-3.65938	down
F01_cb16438_c2577/f1p0/1846	94	130	101	1	0	0	4.18	5.82	5.59	0.05	0	0	1.47113e-11	-8.34475	down
F01_cb16438_c2767/f1p0/2085	57	75	24	0	1	0	2.15	2.85	1.11	0	0.05	0	1.59587e-07	-6.78455	down
F01_cb16438_c2804/f4p4/2707	694	516	706	25	13	29	19.17	14.37	24.3	0.8	0.45	0.8	1.81728e-10	-4.78977	down
F01_cb16438_c32357/f2p0/1861	41	55	45	10	8	3	1.75	2.37	2.38	0.49	0.45	0.13	0.0390782	-2.57477	down
F01_cb16438_c32457/f2p1/3094	277	364	179	130	0	0	6.62	8.74	5.34	3.51	0	0	0.000953093	-2.6159	down
F01_cb16438_c32901/f1p0/1903	1	12	0	40	34	71	0.07	0.6	0	2.09	1.98	3.28	0.000690103	3.80174	up
F01_cb16438_c33544/f1p1/1895	22	5	0	36	45	76	0.93	0.23	0	1.73	2.31	3.13	0.0207547	2.75341	up
F01_cb16438_c33733/f4p0/2662	248	316	135	59	52	40	6.98	8.97	4.73	1.9	1.81	1.12	0.0163648	-1.99821	down
F01_cb16438_c33787/f1p0/2690	27	46	22	2	0	1	0.78	1.31	0.77	0.06	0	0.03	0.000219407	-4.94486	down
F01_cb16438_c33926/f6p4/1762	48	28	20	0	0	0	2.2	1.31	1.13	0	0	0	2.20806e-06	#NAME?	down
F01_cb16438_c34179/f1p1/3346	792	1300	403	5	0	0	17.5	28.82	11.08	0.14	0	0	1.34308e-15	-8.88694	down
F01_cb16438_c34344/f1p0/2631	4	0	1	25	49	44	0.15	0	0.04	0.87	1.81	1.3	0.000155543	4.72715	up
F01_cb16438_c34617/f1p1/3842	25	25	15	0	0	0	0.48	0.49	0.37	0	0	0	6.49573e-05	#NAME?	down
F01_cb16438_c34724/f1p0/2379	54	84	32	9	5	5	1.74	2.72	1.27	0.34	0.23	0.19	0.00636662	-2.9767	down
F01_cb16438_c36243/f1p0/2570	56	52	47	0	0	22	1.65	1.56	1.74	0	0	0.66	0.0264641	-2.83351	down
F01_cb16438_c36501/f1p1/2992	45	45	62	4	6	3	1.12	1.13	1.92	0.12	0.19	0.07	0.00177835	-3.38744	down
F01_cb16438_c36664/f1p0/2176	40	40	55	0	0	0	1.55	1.57	2.67	0	0	0	7.15722e-08	#NAME?	down
F01_cb16438_c37466/f2p1/3048	0	0	0	54	23	24	0	0	0	1.5	0.72	0.58	3.52274e-07	Inf	up
F01_cb16438_c37619/f1p0/2836	32	45	50	0	0	0	0.95	1.33	1.82	0	0	0	1.33699e-07	#NAME?	down
F01_cb16438_c38254/f1p0/1902	89	96	127	25	23	16	3.67	4.01	6.52	1.17	1.17	0.66	0.0469986	-2.16811	down
F01_cb16438_c38668/f1p0/2005	67	104	50	0	0	0	2.6	4.09	2.43	0	0	0	4.4435e-10	#NAME?	down
F01_cb16438_c38701/f1p0/2104	52	62	36	2	1	3	1.99	2.37	1.74	0.11	0.07	0.14	5.11484e-05	-4.53908	down
F01_cb16438_c39370/f1p1/1846	59	83	99	0	15	20	2.55	3.61	5.29	0	0.83	0.85	0.0114119	-2.63386	down
F01_cb16438_c39452/f1p0/2169	76	59	46	0	0	0	2.69	2.11	2.03	0	0	0	3.70885e-09	#NAME?	down
F01_cb16438_c39594/f1p0/2987	702	1184	687	2	12	4	17.39	29.5	21.22	0.07	0.4	0.11	4.6604e-17	-6.83573	down
F01_cb16438_c40790/f1p0/1562	379	325	298	10	8	0	19.89	17.33	19.46	0.61	0.58	0	9.47767e-14	-5.60011	down
F01_cb16438_c41040/f1p0/1666	365	346	559	16	8	0	18.72	18.04	35.66	0.94	0.56	0	1.96896e-06	-5.63521	down
F01_cb16438_c41690/f1p0/2706	50	40	59	1	0	1	1.38	1.13	2.02	0.04	0	0.04	9.53317e-07	-6.27564	down
F01_cb16438_c42673/f2p1/2227	218	198	146	47	20	37	7.51	6.91	6.28	1.87	0.86	1.28	0.00633965	-2.33334	down
F01_cb16438_c43640/f1p0/1651	0	0	2	66	174	65	0	0	0.15	3.68	10.49	3.2	0.0149115	7.22334	up
F01_cb16438_c43851/f1p0/2131	60	40	27	19	0	0	2.25	1.53	1.25	0.83	0	0	0.0499226	-2.7188	down
F01_cb16438_c43876/f1p0/3053	956	434	601	0	0	0	23.03	10.52	18.03	0	0	0	3.68259e-16	#NAME?	down
F01_cb16438_c44197/f1p0/1739	18	20	10	60	58	117	0.84	0.93	0.6	3.13	3.27	5.35	0.025227	2.44626	up
F01_cb16438_c44324/f1p0/2419	137	155	103	0	1	10	4.32	4.89	4.02	0	0.04	0.34	1.1678e-08	-5.11246	down
F01_cb16438_c44581/f1p1/2226	32	31	22	0	1	0	1.13	1.11	0.96	0	0.04	0	4.47835e-05	-5.96763	down
F01_cb16438_c4461/f2p0/2721	672	754	612	37	19	20	18.48	20.85	20.95	1.16	0.64	0.55	4.29622e-10	-4.62886	down
F01_cb16438_c44655/f1p0/1859	29	46	31	2	5	6	1.23	1.98	1.63	0.1	0.26	0.25	0.0278826	-2.83888	down
F01_cb16438_c44944/f1p0/1728	50	40	0	116	164	114	2.52	2.06	0	6.56	10.02	5.63	0.0449835	2.44843	up
F01_cb16438_c45046/f3p0/3363	67	54	25	9	3	0	1.47	1.19	0.69	0.23	0.1	0	0.00181517	-3.43849	down
F01_cb16438_c45341/f2p0/1763	17	63	16	0	0	0	0.81	2.92	0.9	0	0	0	0.00639981	#NAME?	down
F01_cb16438_c45366/f1p0/3045	115	210	79	7	3	5	2.8	5.14	2.4	0.21	0.1	0.13	8.84788e-08	-4.59482	down
F01_cb16438_c45870/f1p0/2759	183	142	100	31	10	18	5.32	4.16	3.62	1.03	0.36	0.53	0.00147864	-2.75226	down
F01_cb16438_c4597/f1p0/2615	68	26	21	0	0	0	2.02	0.78	0.78	0	0	0	0.00130456	#NAME?	down
F01_cb16438_c55831/f2p5/3730	63	287	79	0	0	0	1.23	5.61	1.93	0	0	0	0.000369951	#NAME?	down
F01_cb16438_c58581/f2p6/1934	4021	5363	3063	0	0	0	162.77	219.42	154.24	0	0	0	2.82895e-16	#NAME?	down
F01_cb16438_c60202/f1p0/2108	116	137	63	28	6	0	4.47	5.31	3.02	1.22	0.33	0	0.000793937	-3.08414	down
F01_cb16438_c61876/f1p0/2300	66	65	56	0	0	24	2.33	2.29	2.47	0	0	0.83	0.0108164	-2.97542	down
F01_cb16438_c674/f3p0/2953	256	370	364	36	45	40	6.43	9.35	11.39	1.05	1.4	1.01	6.1204e-05	-2.88566	down
F01_cb16438_c69027/f1p16/3596	30	120	36	0	0	0	0.61	2.44	0.93	0	0	0	0.000627331	#NAME?	down
F01_cb16438_c72488/f1p0/2111	97	107	32	0	1	0	3.58	3.95	1.49	0	0.05	0	9.97798e-09	-7.37941	down
F01_cb16438_c824/f2p0/1625	49	160	54	0	2	0	2.45	8.07	3.34	0	0.12	0	9.39333e-05	-6.53617	down
F01_cb16438_c8807/f1p8/2539	23	91	32	0	0	0	0.7	2.74	1.21	0	0	0	0.000323703	#NAME?	down
F01_cb16438_c9251/f2p0/2080	97	81	79	0	0	0	3.61	3.05	3.67	0	0	0	5.83739e-11	#NAME?	down
F01_cb16438_c9523/f1p3/3731	109	166	111	0	0	0	2.11	3.22	2.69	0	0	0	6.44848e-14	#NAME?	down
F01_cb16438_c9708/f1p0/2625	147	161	66	17	22	18	4.2	4.63	2.38	0.55	0.77	0.51	0.00465566	-2.48068	down
F01_cb16445_c2/f1p0/870	70	55	72	10	10	0	7.94	6.45	10.13	1.31	1.39	0	0.00232233	-3.10945	down
F01_cb16458_c1/f1p0/1377	102	116	69	0	48	0	6.19	7.19	5.26	0	3.65	0	0.0170445	-2.12484	down
F01_cb16460_c2/f1p0/1288	271	246	204	41	45	54	17.97	16.66	16.78	3.12	3.71	3.6	0.00623609	-2.21517	down
F01_cb16498_c20/f1p0/1284	1097	1714	935	0	1	0	77.07	122.95	81.62	0	0.12	0	4.06969e-23	-11.4106	down
F01_cb16498_c5/f1p1/1302	157	359	142	2	4	6	10.27	23.94	11.58	0.16	0.32	0.42	9.97798e-09	-5.5641	down
F01_cb16589_c1/f1p0/1414	7	2	7	67	23	33	0.48	0.12	0.57	4.69	1.78	2.01	0.00931012	2.94198	up
F01_cb16683_c0/f2p0/1135	252	311	331	0	0	0	19.65	24.83	32.04	0	0	0	3.43907e-21	#NAME?	down
F01_cb16891_c0/f5p0/796	284	366	1101	0	0	0	36.5	48.99	175.07	0	0	0	0.00237779	#NAME?	down
F01_cb16891_c1/f2p0/869	221	431	1013	0	1	1	24.97	50.46	141.56	0	0.14	0.11	0.00629534	-9.60164	down
F01_cb16891_c2/f1p0/795	439	435	992	1	0	0	56.21	58	157.15	0.15	0	0	1.2973e-05	-10.9705	down
F01_cb16913_c1/f8p0/546	137	187	119	37	14	43	33.82	50	36.08	10.58	4.36	11.13	0.0306763	-2.1491	down
F01_cb16913_c8/f1p0/526	59	65	30	3	10	4	16.21	19.32	10.02	1.16	3.4	1.27	0.00720323	-2.86721	down
F01_cb16968_c4/f1p0/1152	35	42	77	0	0	4	2.66	3.3	7.28	0	0	0.33	0.0122673	-5.36334	down
F01_cb17051_c2/f2p0/970	18	16	26	1	0	0	1.74	1.59	3.11	0.11	0	0	0.00066497	-5.97248	down
F01_cb17059_c1/f1p0/1009	381	476	384	0	0	0	34.7	44.58	43.37	0	0	0	3.84743e-23	#NAME?	down
F01_cb17089_c0/f10p0/652	241	531	203	1	0	0	42.73	99.71	44.4	0.2	0	0	4.12047e-14	-9.86727	down
F01_cb17103_c0/f3p0/1235	465	413	304	1	2	0	32.54	29.47	26.42	0.13	0.24	0	3.00033e-20	-8.31147	down
F01_cb17103_c2/f1p0/1442	93	83	33	1	5	1	5.39	4.86	2.4	0.1	0.35	0.11	4.76021e-06	-4.52597	down
F01_cb17246_c2/f1p0/1415	137	72	180	563	510	1145	8.85	4.71	14.41	41.16	40.3	73.35	0.00126343	2.52938	up
F01_cb17251_c2/f1p0/1473	2	6	2	25	28	43	0.11	0.35	0.2	1.65	1.95	2.41	0.00512089	3.47283	up
F01_cb17255_c3/f1p0/750	63	54	53	3	1	7	8.84	7.88	9.23	0.62	0.18	1.12	0.000305059	-3.92473	down
F01_cb1727_c12/f1p0/2191	0	2	0	23	28	43	0	0.1	0	1.07	1.37	1.71	1.75187e-05	5.92072	up
F01_cb1731_c67/f1p1/3042	550	748	411	92	52	64	13.41	18.32	12.47	2.56	1.57	1.56	9.59229e-05	-2.88941	down
F01_cb1731_c93/f1p0/2001	14	0	0	27	21	41	0.56	0	0	1.21	1.05	1.59	0.0400964	2.82754	up
F01_cb17330_c1/f1p0/896	67	77	108	20	3	12	6.89	8.17	13.76	2.35	0.38	1.24	0.0153537	-2.86657	down
F01_cb17484_c18/f7p0/1228	1598	2419	2075	10	7	0	112.55	173.86	181.39	0.87	0.67	0	1.81992e-15	-8.30486	down
F01_cb17695_c4/f1p0/1104	28	84	45	0	0	0	2.26	6.94	4.5	0	0	0	1.38103e-07	#NAME?	down
F01_cb17709_c1/f1p0/1595	170	204	634	0	1	0	8.67	10.53	40.11	0	0.06	0	0.0128494	-9.69061	down
F01_cb17709_c2/f1p0/559	41	30	97	0	0	0	9.82	7.84	28.16	0	0	0	0.0156561	#NAME?	down
F01_cb17935_c6/f1p0/1578	810	19	541	0	0	0	49.98	1.22	41.5	0	0	0	0.000531372	#NAME?	down
F01_cb17998_c0/f1p0/755	29	28	56	309	185	197	4.04	4.14	9.75	49.37	31.64	27.76	0.000207736	2.64781	up
F01_cb18043_c0/f5p0/1173	124	524	597	0	0	0	9.26	40.02	55.35	0	0	0	1.20625e-05	#NAME?	down
F01_cb18043_c1/f4p0/1217	89	144	443	0	0	0	6.34	10.47	39.17	0	0	0	0.024534	#NAME?	down
F01_cb18043_c2/f1p0/1331	35	27	57	0	0	0	2.22	1.75	4.5	0	0	0	0.000224243	#NAME?	down
F01_cb1807_c2/f1p0/3455	63	83	17	0	0	8	1.34	1.76	0.47	0	0	0.17	0.00446729	-4.26119	down
F01_cb1813_c44/f1p0/2097	152	274	87	0	0	0	5.74	10.45	4.09	0	0	0	1.78014e-12	#NAME?	down
F01_cb18165_c1/f1p0/841	115	144	69	10	20	24	13.72	17.78	10.24	1.47	2.91	2.88	0.011692	-2.38867	down
F01_cb18199_c4/f1p1/1495	103	82	94	14	5	11	5.8	4.73	6.59	0.9	0.35	0.62	0.00112826	-3.16634	down
F01_cb18356_c1/f1p0/1119	733	256	1552	0	1	0	58.31	20.87	153.07	0	0.1	0	0.00202472	-11.0334	down
F01_cb18356_c4/f1p0/1106	421	346	966	0	0	0	34	28.69	96.81	0	0	0	4.14648e-05	#NAME?	down
F01_cb18580_c4/f1p0/941	24	0	0	57	67	49	2.46	0	0	6.56	8.28	4.92	0.00501434	3.07857	up
F01_cb18609_c3/f1p0/725	400	608	429	62	137	79	63.13	100.91	83.75	11.28	26.61	12.68	0.0065137	-2.13699	down
F01_cb18691_c1/f1p0/594	259	231	1110	0	1	0	54.21	51.77	286.04	0	0.26	0	0.0449758	-10.387	down
F01_cb18707_c1/f2p1/1056	266	330	274	0	2	0	22.91	29.16	29.18	0	0.26	0	5.57566e-19	-8.3414	down
F01_cb18975_c1/f1p0/871	564	753	2378	0	7	2	77.43	108.01	403.45	0	1.18	0.28	0.0289383	-8.48581	down
F01_cb19085_c0/f1p0/812	20	29	17	1	0	5	2.51	3.78	2.64	0.14	0	0.63	0.0311394	-3.44097	down
F01_cb1908_c10/f1p3/2927	0	17	5	46	55	34	0	0.46	0.16	1.34	1.73	0.87	0.0200965	2.89946	up
F01_cb19095_c5/f1p0/1514	132	42	99	0	0	0	7.48	2.42	7.01	0	0	0	2.15728e-06	#NAME?	down
F01_cb19411_c4/f1p0/1546	153	71	45	0	0	0	8.1	3.83	2.99	0	0	0	2.17911e-05	#NAME?	down
F01_cb19461_c3/f1p0/906	888	532	219	0	0	0	105.92	65.9	32.4	0	0	0	8.4666e-09	#NAME?	down
F01_cb19461_c8/f1p1/692	1047	1750	722	0	0	0	165.2	290.5	140.68	0	0	0	2.81462e-24	#NAME?	down
F01_cb19496_c141/f4p2/1150	403	501	631	39	15	64	30.92	39.3	60.09	3.48	1.49	4.92	4.38081e-05	-3.69218	down
F01_cb19496_c634/f1p4/6117	9925	2340	5170	11	0	0	117.39	27.71	76.19	0.16	0	0	6.53641e-08	-10.6681	down
F01_cb19496_c660/f1p9/4502	26	23	18	0	0	0	0.42	0.37	0.36	0	0	0	4.95833e-05	#NAME?	down
F01_cb19682_c1826/f1p0/330	80	16	126	0	0	0	77.62	18.88	148.81	0	0	0	0.0176757	#NAME?	down
F01_cb19682_c571/f1p0/926	597	181	881	0	1	0	61.46	19.27	112.42	0	0.18	0	0.000132191	-10.3904	down
F01_cb19777_c5/f1p0/399	45	59	40	15	0	0	22.84	34.27	24.2	8.91	0	0	0.00622225	-3.24974	down
F01_cb19861_c2/f1p0/1491	15	34	16	0	0	0	0.87	1.91	1.15	0	0	0	6.66704e-05	#NAME?	down
F01_cb19861_c4/f1p1/1326	119	88	103	5	1	3	7.63	5.8	8.21	0.36	0.08	0.19	1.27191e-07	-5.08148	down
F01_cb19929_c1/f1p0/562	251	311	165	5	13	9	58.44	77.99	47.34	1.48	3.79	2.21	6.83535e-10	-4.49577	down
F01_cb20006_c0/f2p0/583	25	59	52	7	7	5	5.42	13.72	13.87	1.76	1.86	1.11	0.0298741	-2.6895	down
F01_cb20078_c14/f1p0/1135	456	515	317	4	9	6	35.64	41.12	30.73	0.39	0.94	0.53	6.49293e-15	-5.84286	down
F01_cb20148_c5/f4p0/689	110	138	41	24	10	11	17.83	23.51	8.34	4.61	2.16	1.93	0.012937	-2.50201	down
F01_cb20351_c1/f1p0/1101	53	91	65	0	0	0	4.3	7.57	6.55	0	0	0	7.73073e-10	#NAME?	down
F01_cb20435_c15/f2p0/1429	38	47	26	0	0	1	2.23	2.8	1.88	0	0	0.06	4.23897e-06	-6.7713	down
F01_cb20450_c3/f2p0/347	0	0	0	21	32	30	0	0	0	20.97	31.45	28.44	1.78912e-06	Inf	up
F01_cb2046_c7/f1p0/1835	223	113	95	20	37	9	9.9	5.07	5.24	1.03	2.03	0.4	0.0270209	-2.4419	down
F01_cb20498_c0/f3p0/884	147	112	72	16	16	9	16.17	12.75	9.81	2.01	2.16	1	0.00158924	-2.80804	down
F01_cb20553_c1/f1p0/1192	0	15	7	54	36	36	0	1.18	0.65	4.65	3.38	2.72	0.0327963	2.69484	up
F01_cb20714_c2/f1p0/1331	275	402	323	39	88	73	18.38	27.34	26.79	3.01	7.29	4.9	0.00696506	-2.12478	down
F01_cb20738_c2/f1p0/1153	0	13	5	84	88	79	0	1.01	0.54	7.32	8.25	6.04	2.16216e-05	4.02984	up
F01_cb20997_c1/f1p0/797	55	87	59	4	0	8	7.12	11.54	9.39	0.7	0	1.08	0.000114382	-4.06063	down
F01_cb209_c16/f1p0/4798	93	90	117	16	9	7	1.4	1.36	2.18	0.28	0.18	0.12	0.000741062	-3.14159	down
F01_cb209_c7/f1p1/4058	101	101	83	47	0	1	1.95	1.94	2	1.04	0	0.02	0.0199186	-2.57072	down
F01_cb21018_c14/f1p0/1338	52	96	53	16	10	1	3.28	6.22	4.18	1.17	0.83	0.08	0.0121703	-2.6927	down
F01_cb21018_c29/f1p0/640	36	63	48	0	0	0	6.78	12.45	11.09	0	0	0	3.2668e-08	#NAME?	down
F01_cb21088_c1/f1p0/1362	90	146	196	0	1	0	5.56	9.21	15.05	0	0.08	0	7.99018e-07	-8.38775	down
F01_cb210_c6/f1p0/3912	21	41	24	0	0	0	0.41	0.8	0.57	0	0	0	6.10425e-06	#NAME?	down
F01_cb21121_c0/f1p0/1398	139	151	111	3	0	13	8.32	9.2	8.27	0.27	0	0.77	1.26025e-07	-4.64628	down
F01_cb2115_c12/f1p0/3345	126	80	127	13	0	0	2.86	1.82	3.57	0.35	0	0	8.83894e-07	-4.73032	down
F01_cb21322_c4/f1p0/1590	181	166	133	46	24	22	8.85	8.23	8.06	2.56	1.46	1.11	0.0117791	-2.25739	down
F01_cb21353_c0/f1p0/1062	131	167	115	12	45	15	11.16	14.6	12.15	1.17	4.71	1.28	0.00816971	-2.22686	down
F01_cb2140_c10/f1p0/2720	305	220	177	30	34	60	8.39	6.09	6.07	0.95	1.15	1.65	0.00283358	-2.36712	down
F01_cb21518_c1/f1p0/427	7	13	1	52	51	55	2.91	6.13	0.51	25.56	25.86	24.53	0.00484603	3.19968	up
F01_cb21555_c2/f1p0/1230	98	151	99	10	49	11	6.94	10.89	8.65	0.87	4.24	0.81	0.0334172	-1.98698	down
F01_cb21595_c1/f1p1/1127	94	73	48	7	10	0	7.37	5.85	4.68	0.67	1.03	0	0.000450352	-3.37134	down
F01_cb21658_c0/f1p0/1089	39	41	49	0	0	0	3.21	3.46	5	0	0	0	1.15639e-07	#NAME?	down
F01_cb21666_c0/f1p0/1045	29	45	19	0	3	0	2.53	4.07	2.1	0	0.32	0	0.000258122	-4.47216	down
F01_cb21688_c104/f1p0/523	111	69	49	3	5	9	29.8	20.35	16.14	0.98	1.65	2.6	0.000249277	-3.59684	down
F01_cb21688_c210/f1p0/1320	128	165	81	22	24	26	8.78	11.57	6.88	1.74	2.04	1.79	0.0231212	-2.18084	down
F01_cb21688_c211/f1p0/452	106	108	102	425	438	352	39.62	45.39	46.44	186.67	199.59	139.6	0.0159242	2.09612	up
F01_cb21688_c227/f1p0/587	266	211	252	3	0	1	58.46	49.93	68.12	0.95	0	0.41	2.0752e-16	-7.54283	down
F01_cb21769_c2/f1p0/599	72	70	64	1	0	5	14.68	15.42	16.15	0.44	0	1.09	2.37035e-06	-5.11893	down
F01_cb22135_c0/f1p0/1559	34	32	19	1	0	3	1.8	1.72	1.28	0.11	0	0.17	0.00133426	-4.38787	down
F01_cb22226_c2/f1p0/4522	55	53	48	0	1	0	0.87	0.84	0.95	0	0.04	0	1.37873e-07	-6.86567	down
F01_cb22237_c8/f1p15/9309	16238	17760	14432	48	4	9	123.12	134.61	136.38	0.42	0.05	0.07	0.0180495	-9.60291	down
F01_cb22265_c8/f1p2/4885	182	264	180	17	13	8	2.64	3.84	3.25	0.29	0.24	0.11	1.80033e-07	-3.87063	down
F01_cb2226_c4/f1p0/2589	21	28	27	0	5	0	0.67	0.87	1.04	0	0.21	0	0.00593543	-3.51895	down
F01_cb22314_c0/f1p0/8202	597	898	493	139	14	156	5.03	7.57	5.18	1.33	0.15	1.3	0.00143493	-2.63617	down
F01_cb22337_c0/f1p0/4537	246	237	317	17	12	23	3.89	3.76	6.23	0.32	0.24	0.37	6.495e-07	-3.88398	down
F01_cb22349_c0/f1p0/5081	71	137	63	6	6	23	1.01	1.92	1.11	0.09	0.11	0.33	0.00469228	-2.82894	down
F01_cb22351_c3/f1p0/5015	2845	1309	1933	4	4	0	40.69	18.76	34.44	0.07	0.09	0	2.14633e-16	-9.37383	down
F01_cb22358_c0/f3p0/4726	1045	1610	2140	0	1	2	15.79	24.37	40.26	0	0.02	0.03	8.1716e-12	-10.5494	down
F01_cb22358_c1/f1p0/5066	743	687	1627	1	0	0	11.19	10.37	30.51	0.02	0	0	3.68544e-06	-11.6841	down
F01_cb22392_c1/f1p0/5808	835	256	1312	0	0	1	10.15	3.12	19.87	0	0	0.01	0.000127871	-11.3679	down
F01_cb2248_c5/f2p0/3276	48	46	33	0	0	0	1.08	1.05	0.93	0	0	0	1.4592e-07	#NAME?	down
F01_cb2411_c17/f1p0/2773	43	49	53	0	22	0	1.35	1.55	2.07	0	0.86	0	0.0389935	-2.32198	down
F01_cb2535_c1/f1p0/3265	126	230	170	0	1	0	2.83	5.16	4.75	0	0.03	0	1.3295e-15	-8.60908	down
F01_cb2589_c34/f1p0/2633	340	463	562	0	0	0	10.25	14.04	21.06	0	0	0	1.20272e-15	#NAME?	down
F01_cb2611_c10/f1p0/5672	351	323	164	15	114	0	4.35	4.01	2.54	0.21	1.75	0	0.00196206	-2.27458	down
F01_cb2616_c14/f1p1/2273	0	0	0	71	68	25	0	0	0	2.74	2.82	0.84	1.1232e-05	Inf	up
F01_cb2655_c7/f2p0/2420	0	0	31	87	49	46	0	0	1.21	3.11	1.9	1.43	0.0147807	2.39237	up
F01_cb2657_c11/f1p0/3044	0	0	0	24	18	16	0	0	0	0.67	0.55	0.4	4.30233e-05	Inf	up
F01_cb2659_c6/f1p0/3368	102	154	124	17	8	30	2.23	3.37	3.38	0.44	0.23	0.65	0.00278323	-2.72744	down
F01_cb2660_c30/f1p0/2631	20	40	18	0	3	2	0.6	1.21	0.68	0	0.13	0.09	0.00536324	-3.64609	down
F01_cb2667_c8/f1p0/3554	38	28	38	13	0	0	0.88	0.64	1.08	0.35	0	0	0.0309672	-3.04114	down
F01_cb2680_c10/f1p0/1906	75	16	30	0	0	0	3.65	0.79	1.82	0	0	0	0.00671018	#NAME?	down
F01_cb2715_c7/f2p0/3020	114	92	95	10	2	20	2.81	2.27	2.91	0.28	0.07	0.48	0.000784955	-3.22549	down
F01_cb2729_c22/f1p0/2059	60	54	42	0	7	0	2.35	2.14	2.03	0	0.35	0	6.8284e-05	-4.04317	down
F01_cb2729_c3/f2p0/1890	26	18	62	0	0	0	1.08	0.76	3.21	0	0	0	0.0457586	#NAME?	down
F01_cb2779_c6/f1p1/2732	614	261	198	0	0	0	16.76	7.17	6.73	0	0	0	1.32173e-07	#NAME?	down
F01_cb2780_c30/f1p1/2422	0	0	0	50	18	43	0	0	0	1.8	0.71	1.35	1.17235e-07	Inf	up
F01_cb3016_c7/f1p0/2502	49	32	37	8	0	3	1.54	1.01	1.46	0.29	0	0.12	0.0059196	-3.44779	down
F01_cb30_c2/f1p0/4336	43	41	21	0	0	7	0.72	0.68	0.44	0	0	0.12	0.00208047	-3.87637	down
F01_cb3101_c180/f1p0/2182	51	60	48	3	0	16	1.8	2.15	2.14	0.14	0	0.58	0.0101383	-3.07313	down
F01_cb3101_c41/f1p0/2229	73	49	54	0	0	26	2.51	1.72	2.33	0	0	0.89	0.0261991	-2.7863	down
F01_cb3130_c3/f1p0/3263	73	82	89	13	9	20	1.65	1.86	2.51	0.35	0.27	0.46	0.0316356	-2.46938	down
F01_cb3211_c1/f1p0/3343	149	279	219	5	0	12	3.26	6.11	5.96	0.13	0	0.27	6.14363e-11	-5.26184	down
F01_cb3243_c0/f1p1/3232	147	182	145	12	9	13	3.36	4.17	4.12	0.31	0.27	0.3	3.94077e-06	-3.67912	down
F01_cb3243_c3/f1p1/2193	260	397	285	49	38	56	9.12	14.03	12.44	1.98	1.66	1.97	0.000548384	-2.58982	down
F01_cb3336_c50/f1p0/2853	166	148	105	19	46	12	4.33	3.89	3.44	0.58	1.49	0.32	0.011679	-2.15986	down
F01_cb3341_c0/f1p0/3211	112	512	549	1	0	0	2.58	11.77	15.66	0.03	0	0	3.72822e-05	-10.2473	down
F01_cb3341_c1/f1p0/2242	34	214	240	0	0	0	1.19	7.38	10.22	0	0	0	0.000756525	#NAME?	down
F01_cb3341_c3/f1p0/6484	39	176	163	0	0	0	0.47	2.1	2.42	0	0	0	4.03468e-05	#NAME?	down
F01_cb3341_c4/f1p0/5139	31	160	148	0	0	0	0.46	2.31	2.66	0	0	0	0.00013421	#NAME?	down
F01_cb3341_c5/f1p0/4969	65	455	470	0	0	0	0.94	6.54	8.4	0	0	0	0.000109655	#NAME?	down
F01_cb3401_c8/f1p0/1014	26	24	18	0	0	0	2.36	2.24	2.02	0	0	0	4.41302e-05	#NAME?	down
F01_cb3437_c0/f1p0/3186	23	21	19	2	1	2	0.54	0.49	0.57	0.07	0.04	0.06	0.0222862	-3.56991	down
F01_cb3513_c10/f1p1/2144	4	0	0	39	45	64	0.17	0	0	1.61	1.99	2.3	2.09823e-06	5.40001	up
F01_cb3518_c11/f1p1/1258	97	179	189	15	9	15	6.65	12.5	16.03	1.22	0.8	1.05	0.000567617	-3.50545	down
F01_cb3631_c1/f1p0/3120	37	34	27	0	6	0	0.95	0.87	0.87	0	0.21	0	0.00177476	-3.59705	down
F01_cb363_c7/f1p0/3920	218	167	241	0	0	0	4.51	3.48	6.22	0	0	0	2.83283e-16	#NAME?	down
F01_cb3666_c35/f1p0/2482	0	0	0	152	13	315	0	0	0	5.41	0.54	9.82	0.00887597	Inf	up
F01_cb3738_c83/f48p5/2620	2388	2651	1647	353	41	565	68.42	76.47	58.74	11.49	1.47	16.05	0.0312738	-2.76257	down
F01_cb3803_c3/f1p0/2913	111	146	188	44	0	14	2.83	3.75	5.94	1.29	0	0.37	0.0121522	-2.99396	down
F01_cb3847_c0/f4p0/1578	72	880	1111	0	1	0	3.75	46.01	71.18	0	0.06	0	0.0016247	-10.6594	down
F01_cb3847_c3/f1p0/2530	359	1267	2973	0	0	0	10.66	37.78	109.57	0	0	0	0.00240995	#NAME?	down
F01_cb3847_c4/f1p0/2130	49	254	413	0	0	0	1.78	9.29	18.61	0	0	0	0.00478362	#NAME?	down
F01_cb3856_c23/f1p0/2533	230	268	192	0	30	0	6.82	7.99	7.1	0	1.1	0	3.81987e-09	-4.08512	down
F01_cb3867_c4/f1p0/2687	211	184	147	20	5	18	5.89	5.17	5.13	0.64	0.18	0.5	4.74346e-06	-3.59819	down
F01_cb3879_c8/f1p1/2191	263	358	185	2	2	0	9.18	12.6	8.05	0.08	0.09	0	4.2362e-17	-7.38734	down
F01_cb3879_c9/f1p0/2206	153	158	72	0	0	6	5.32	5.54	3.12	0	0	0.21	5.95678e-10	-5.95749	down
F01_cb3883_c23/f1p1/2723	142	127	53	0	0	5	3.95	3.56	1.83	0	0	0.16	4.30063e-09	-5.96439	down
F01_cb3926_c13/f1p0/616	82	147	97	9	4	2	15.97	30.5	23.28	2.02	0.96	0.4	1.78177e-06	-4.30281	down
F01_cb3947_c42/f1p0/2209	45	37	61	0	0	0	1.68	1.39	2.83	0	0	0	3.15788e-07	#NAME?	down
F01_cb3_c43/f1p0/3124	0	0	0	27	18	44	0	0	0	0.78	0.58	1.09	1.00519e-06	Inf	up
F01_cb4050_c0/f1p1/3047	449	554	422	1	0	0	10.85	13.45	12.71	0.03	0	0	1.11876e-22	-10.4736	down
F01_cb4050_c2/f1p1/5242	21	19	32	0	0	0	0.29	0.26	0.54	0	0	0	6.48136e-05	#NAME?	down
F01_cb4081_c12/f1p0/1903	6	4	11	36	24	74	0.26	0.19	0.61	1.82	1.32	3.25	0.0303811	2.64753	up
F01_cb4091_c4/f1p0/2561	26	32	18	0	0	5	0.77	0.96	0.69	0	0	0.15	0.00647615	-3.90426	down
F01_cb4094_c6/f1p0/3133	0	0	0	25	16	37	0	0	0	0.68	0.47	0.87	3.43818e-06	Inf	up
F01_cb4105_c117/f1p0/2408	464	622	171	0	0	0	14.7	19.84	6.75	0	0	0	2.96676e-14	#NAME?	down
F01_cb4105_c123/f1p4/2691	7	9	0	157	58	150	0.21	0.28	0	4.96	2.01	4.14	6.06812e-08	4.73293	up
F01_cb4105_c59/f1p0/2643	77	125	48	0	2	7	2.34	3.85	1.82	0	0.08	0.24	2.74063e-06	-4.63458	down
F01_cb412_c56/f1p0/4211	432	564	307	30	17	48	7.3	9.57	6.48	0.58	0.36	0.8	2.48119e-07	-3.66235	down
F01_cb4242_c1/f1p0/3004	104	76	35	19	4	14	2.58	1.89	1.09	0.55	0.13	0.34	0.0450889	-2.44181	down
F01_cb4429_c6/f1p0/2951	44	43	61	0	0	0	1.13	1.1	1.91	0	0	0	2.73884e-08	#NAME?	down
F01_cb456_c17/f1p0/2660	54	60	59	0	0	19	1.6	1.8	2.2	0	0	0.57	0.00525335	-3.21545	down
F01_cb4594_c3/f2p1/2449	216	166	110	32	6	36	6.7	5.18	4.25	1.14	0.24	1.12	0.0017611	-2.67567	down
F01_cb4661_c7/f1p0/2324	0	0	44	126	86	53	0	0	1.82	4.71	3.52	1.76	0.0439871	2.45468	up
F01_cb46_c4/f1p0/3769	45	42	16	4	0	1	0.88	0.83	0.39	0.09	0	0.03	0.000661849	-4.30723	down
F01_cb4730_c2/f5p0/1673	165	140	104	2	0	0	7.95	6.86	6.26	0.12	0	0	1.26485e-12	-7.66499	down
F01_cb4770_c11/f1p1/2391	69	62	44	2	8	8	2.19	2.01	1.75	0.08	0.34	0.28	0.00359377	-3.06421	down
F01_cb4803_c5/f1p0/1874	118	122	102	13	6	14	5	5.18	5.38	0.62	0.35	0.6	0.000222829	-3.29175	down
F01_cb4866_c11/f6p0/2631	80	113	73	0	6	16	2.31	3.26	2.62	0	0.24	0.46	0.000268564	-3.45447	down
F01_cb4868_c27/f1p0/2582	0	132	0	243	110	236	0	4.03	0	8.37	4.14	7.12	0.0112495	2.473	up
F01_cb4879_c9/f1p2/2310	52	26	13	0	0	0	1.75	0.87	0.55	0	0	0	0.00165879	#NAME?	down
F01_cb4889_c9/f1p0/2305	63	100	81	0	0	0	2.11	3.37	3.34	0	0	0	1.20671e-10	#NAME?	down
F01_cb4902_c0/f1p0/2861	30	51	53	2	2	1	0.97	1.61	2.07	0.1	0.08	0.04	5.99821e-05	-4.59293	down
F01_cb4911_c24/f1p0/1491	142	142	70	2	7	0	7.88	8.01	4.86	0.17	0.51	0	2.14229e-08	-4.91192	down
F01_cb4961_c22/f1p3/2068	75	16	25	0	0	0	2.84	0.63	1.17	0	0	0	0.0179721	#NAME?	down
F01_cb4981_c10/f1p0/1633	305	400	273	0	4	0	15.07	20.05	16.79	0	0.27	0	1.68601e-18	-7.49221	down
F01_cb5030_c19/f1p0/1972	163	182	114	53	5	26	6.7	7.58	5.83	2.47	0.26	1.08	0.00982508	-2.40118	down
F01_cb5081_c4/f1p0/2727	8	0	0	52	29	18	0.22	0	0	1.64	1.02	0.51	0.00446047	3.81684	up
F01_cb5139_c13/f1p0/1962	50	69	49	0	13	14	1.96	2.76	2.39	0	0.66	0.58	0.0438486	-2.41059	down
F01_cb5272_c2/f1p0/2222	2	4	5	22	66	71	0.09	0.15	0.22	0.88	2.8	2.44	0.0177648	3.98577	up
F01_cb5342_c2/f1p0/2783	92	75	74	13	14	5	2.74	2.26	2.77	0.46	0.54	0.15	0.00694451	-2.72408	down
F01_cb5355_c25/f6p2/2483	417	452	207	29	37	42	12.7	13.87	7.85	1	1.42	1.29	7.90767e-06	-3.11089	down
F01_cb5468_c20/f1p0/1593	22	0	81	136	108	167	1.15	0	5.12	7.89	6.75	8.44	0.0228982	1.89682	up
F01_cb5499_c20/f1p0/2538	0	0	11	28	17	42	0	0	0.42	0.96	0.64	1.26	0.0160659	2.78624	up
F01_cb5606_c8/f1p0/1362	21	34	24	7	0	0	1.32	2.14	1.89	0.52	0	0	0.0162505	-3.48937	down
F01_cb5740_c10/f1p0/2456	22	33	26	2	0	1	0.69	1.05	1.01	0.07	0	0.03	0.000761716	-4.76078	down
F01_cb5740_c3/f2p0/2466	87	93	62	0	0	0	2.69	2.9	2.38	0	0	0	1.41662e-10	#NAME?	down
F01_cb5740_c7/f1p0/2440	29	39	21	0	1	1	0.9	1.25	0.82	0	0.04	0.03	0.000123659	-5.21555	down
F01_cb5741_c6/f1p1/1619	64	92	47	0	0	0	3.22	4.66	2.93	0	0	0	1.14684e-09	#NAME?	down
F01_cb5757_c25/f1p0/1954	104	29	47	0	0	0	4.17	1.19	2.36	0	0	0	0.000227165	#NAME?	down
F01_cb5765_c4/f1p0/2240	302	255	107	29	6	0	10.33	8.8	4.59	1.15	0.29	0	1.8182e-06	-4.10974	down
F01_cb588_c0/f2p0/1802	1325	1033	1904	0	1	3	58.2	45.94	104.01	0	0.05	0.13	1.84344e-11	-10.0176	down
F01_cb588_c1/f1p0/4174	3296	3612	6894	1	0	1	61.14	67.22	159.28	0.03	0	0.02	1.03733e-09	-12.8463	down
F01_cb588_c10/f1p0/2183	662	844	1414	0	0	0	23.13	29.75	61.42	0	0	0	2.31226e-09	#NAME?	down
F01_cb588_c11/f1p0/1583	369	280	461	0	0	0	19.27	14.81	29.89	0	0	0	9.01667e-14	#NAME?	down
F01_cb588_c12/f1p0/5073	145	144	381	0	0	0	2.03	2.02	6.66	0	0	0	0.000663883	#NAME?	down
F01_cb588_c2/f1p0/2116	674	594	1374	0	1	0	24.59	21.89	62.4	0	0.04	0	1.60612e-06	-11.0406	down
F01_cb588_c4/f1p0/3868	278	390	844	0	0	0	5.2	7.33	19.67	0	0	0	7.31734e-05	#NAME?	down
F01_cb588_c5/f1p0/3378	1569	1276	2332	3	2	2	34.96	28.57	64.7	0.09	0.05	0.06	8.32663e-11	-9.47145	down
F01_cb588_c6/f1p0/3572	697	748	1591	0	1	0	14.22	15.32	40.38	0	0.03	0	1.64483e-06	-11.2393	down
F01_cb588_c7/f1p0/1749	140	196	381	0	0	1	6.4	9.04	21.6	0	0	0.05	0.000207224	-9.59309	down
F01_cb588_c8/f1p0/1773	103	70	144	0	0	0	4.65	3.22	8.08	0	0	0	6.43934e-07	#NAME?	down
F01_cb597_c2/f2p1/3992	178	168	144	5	0	12	3.22	3.06	3.24	0.12	0	0.22	7.50953e-09	-4.85882	down
F01_cb6034_c35/f1p0/2600	54	56	78	6	0	17	1.67	1.75	3.01	0.24	0	0.55	0.00775543	-3.09168	down
F01_cb6171_c7/f1p0/1632	37	62	39	3	0	0	1.89	3.21	2.47	0.17	0	0	7.58028e-06	-5.50557	down
F01_cb6188_c2/f2p0/1645	0	0	1	33	44	48	0	0	0.08	1.87	2.7	2.34	2.46361e-07	6.84091	up
F01_cb6200_c6/f1p0/2449	8	0	0	28	20	19	0.25	0	0	0.99	0.79	0.59	0.026133	3.2553	up
F01_cb6233_c14/f1p1/2239	32	24	16	3	0	0	1.1	0.83	0.7	0.15	0	0	0.00192478	-4.56356	down
F01_cb6355_c39/f1p0/2114	24	25	29	0	0	0	1.06	1.12	1.55	0	0	0	1.28414e-05	#NAME?	down
F01_cb644_c44/f1p0/1391	315	485	420	0	0	0	18.91	29.65	31.31	0	0	0	4.37058e-23	#NAME?	down
F01_cb644_c48/f1p0/1015	129	197	212	0	2	0	11.75	18.53	24.05	0	0.22	0	1.14769e-12	-7.67873	down
F01_cb6551_c3/f2p0/2699	18	15	15	0	0	0	0.51	0.42	0.53	0	0	0	0.000609125	#NAME?	down
F01_cb6733_c3/f1p1/2192	80	95	102	0	0	0	2.82	3.37	4.48	0	0	0	1.8289e-11	#NAME?	down
F01_cb6787_c1/f2p1/2332	234	321	229	3	3	9	7.65	10.59	9.34	0.13	0.14	0.29	7.64167e-13	-5.60817	down
F01_cb6802_c9/f1p0/1570	3	0	18	69	71	66	0.16	0	1.2	4.11	4.54	3.43	0.000476016	3.21015	up
F01_cb688_c19/f1p0/3994	0	0	0	39	50	23	0	0	0	0.93	1.32	0.48	1.96766e-05	Inf	up
F01_cb6964_c11/f1p0/1757	30	78	29	0	0	0	1.38	3.58	1.63	0	0	0	9.63654e-07	#NAME?	down
F01_cb7067_c18/f2p0/1547	132	126	84	0	0	1	7	6.79	5.53	0	0	0.05	6.6129e-12	-8.40808	down
F01_cb7067_c27/f1p0/1571	306	421	330	2	0	0	16.29	22.7	21.8	0.12	0	0	2.56835e-20	-9.04702	down
F01_cb7142_c2/f2p0/2483	96	152	70	11	3	6	2.93	4.67	2.65	0.38	0.11	0.18	1.94878e-05	-3.87418	down
F01_cb7143_c7/f1p0/2038	15	23	15	1	1	0	0.59	0.89	0.74	0.05	0.05	0	0.00607664	-4.48231	down
F01_cb7143_c9/f1p0/578	43	59	48	0	0	0	9.5	13.94	13.06	0	0	0	2.61529e-08	#NAME?	down
F01_cb7153_c1/f1p0/2696	265	111	99	7	8	2	7.33	3.09	3.43	0.23	0.3	0.07	0.00157636	-4.57732	down
F01_cb7158_c8/f1p1/2485	33	96	86	0	14	0	1.02	2.96	3.27	0	0.55	0	0.00773563	-3.53748	down
F01_cb7206_c39/f1p0/2242	313	659	205	12	0	0	10.7	22.75	8.75	0.49	0	0	2.53503e-08	-6.53822	down
F01_cb7223_c18/f1p0/1901	264	262	188	0	0	0	10.9	10.94	9.64	0	0	0	2.48059e-19	#NAME?	down
F01_cb7246_c2/f1p0/1763	19	30	28	1	0	3	0.86	1.38	1.59	0.06	0	0.17	0.00263817	-4.29469	down
F01_cb7261_c4/f1p0/1688	0	0	0	20	29	99	0	0	0	1.13	1.74	4.71	0.00745656	Inf	up
F01_cb7403_c2/f1p1/2255	89	81	122	0	0	0	3.05	2.8	5.19	0	0	0	4.23536e-10	#NAME?	down
F01_cb7403_c3/f1p1/2290	227	602	994	0	1	0	7.9	21.1	42.97	0	0.04	0	0.000196273	-10.498	down
F01_cb7403_c5/f1p0/1789	24	33	70	0	0	0	1.06	1.48	3.86	0	0	0	0.0109471	#NAME?	down
F01_cb7409_c2/f2p0/1296	36	35	20	7	4	0	2.41	2.37	1.69	0.53	0.4	0	0.0382209	-2.84655	down
F01_cb7423_c4/f1p0/2306	62	90	106	0	0	2	2.06	3.03	4.4	0	0	0.08	1.71551e-08	-7.06472	down
F01_cb7423_c5/f1p0/2251	78	64	94	0	31	0	2.64	2.18	3.95	0	1.3	0	0.0168329	-2.55217	down
F01_cb7589_c70/f1p0/1913	16	43	25	0	0	0	0.83	2.24	1.62	0	0	0	7.44978e-06	#NAME?	down
F01_cb7598_c31/f1p1/1969	46	48	34	7	0	7	1.85	1.93	1.71	0.33	0	0.3	0.0106282	-3.18487	down
F01_cb7603_c4/f1p0/1907	0	0	0	17	28	22	0	0	0	0.8	1.42	0.93	1.2026e-05	Inf	up
F01_cb7699_c11/f1p0/2124	6	0	0	49	35	36	0.23	0	0	2.04	1.59	1.3	8.10813e-05	4.50791	up
F01_cb7782_c10/f1p0/2551	208	341	173	8	0	0	6.23	10.28	6.44	0.29	0	0	2.32472e-14	-6.45795	down
F01_cb7833_c51/f1p0/1767	755	344	408	90	78	100	35.33	16.34	23.79	4.8	4.52	4.68	0.0183012	-2.3694	down
F01_cb793_c9/f1p0/3016	136	85	87	0	0	0	3.34	2.1	2.66	0	0	0	3.61064e-12	#NAME?	down
F01_cb7950_c0/f1p0/2357	27	103	77	0	0	0	0.88	3.38	3.11	0	0	0	7.58685e-06	#NAME?	down
F01_cb7950_c3/f1p0/2193	77	93	46	0	0	0	2.74	3.36	2.05	0	0	0	5.8137e-10	#NAME?	down
F01_cb7950_c4/f1p0/2189	30	15	25	0	0	0	1.06	0.56	1.1	0	0	0	3.1899e-05	#NAME?	down
F01_cb7978_c4/f2p1/1834	245	311	216	27	30	23	10.59	13.58	11.61	1.32	1.59	0.98	1.55787e-05	-3.08525	down
F01_cb7997_c4/f1p0/1837	3	10	7	62	48	44	0.13	0.43	0.37	3.03	2.54	1.88	0.00450322	3.0918	up
F01_cb8023_c0/f1p0/2349	23	40	12	0	0	0	0.77	1.31	0.5	0	0	0	2.16216e-05	#NAME?	down
F01_cb8030_c12/f1p0/2296	28	42	41	0	3	0	1.15	1.71	2.06	0	0.18	0	5.1319e-05	-4.80591	down
F01_cb8061_c5/f1p0/1810	168	243	183	32	32	45	7.38	10.77	10.01	1.61	1.73	1.97	0.00515374	-2.30776	down
F01_cb8087_c13/f1p0/2268	57	94	32	0	0	0	2.13	3.55	1.53	0	0	0	3.70885e-09	#NAME?	down
F01_cb820_c10/f1p0/3748	67	27	87	0	0	0	1.33	0.53	2.16	0	0	0	0.000385648	#NAME?	down
F01_cb822_c107/f1p1/2184	175	728	498	0	0	0	6.38	26.66	22.52	0	0	0	3.91937e-09	#NAME?	down
F01_cb829_c13/f2p0/2688	90	51	59	0	0	0	2.51	1.45	2.07	0	0	0.02	1.20463e-09	#NAME?	down
F01_cb8347_c6/f1p0/1732	77	61	20	4	5	4	3.57	2.89	1.19	0.24	0.3	0.2	0.00827628	-3.35896	down
F01_cb8400_c2/f1p0/1719	0	8	35	119	45	75	0	0.38	2.06	6.29	2.58	3.48	0.0119563	2.35841	up
F01_cb8419_c46/f1p0/1305	7	0	10	48	13	42	0.51	0	0.85	3.57	1.1	2.77	0.0368693	2.49908	up
F01_cb8430_c0/f3p0/2165	43	64	41	0	0	0	1.54	2.3	1.84	0	0	0	3.16709e-08	#NAME?	down
F01_cb8438_c1/f1p0/2402	141	110	79	11	13	15	4.44	3.5	3.11	0.42	0.5	0.49	0.00115299	-2.91137	down
F01_cb8451_c11/f1p0/2240	0	6	0	34	23	29	0	0.26	0	1.46	1.08	1.1	0.00140094	4.19452	up
F01_cb8494_c18/f1p0/2006	1382	2849	1707	363	104	471	54.54	113.61	83.82	16.29	5.05	18.47	0.0387355	-2.59098	down
F01_cb8521_c10/f1p0/1376	9	0	4	54	24	29	0.59	0	0.36	3.79	1.8	1.79	0.00773563	3.08386	up
F01_cb8607_c2/f1p0/2263	40	31	21	4	0	6	1.54	1.21	1.02	0.18	0	0.26	0.0241672	-3.18709	down
F01_cb875_c33/f1p0/3844	20	24	14	0	0	0	0.42	0.51	0.39	0	0	0	0.000157016	#NAME?	down
F01_cb8831_c5/f1p0/1973	143	164	106	0	8	11	5.68	6.6	5.28	0	0.43	0.44	2.8523e-07	-4.23111	down
F01_cb8837_c1/f2p0/1480	102	151	94	15	29	14	5.69	8.55	6.56	0.96	2.05	0.8	0.0102229	-2.33228	down
F01_cb8837_c6/f1p0/1781	45	84	83	0	18	7	2.04	3.79	4.62	0	0.99	0.32	0.00463988	-2.79539	down
F01_cb8905_c0/f1p0/2221	359	481	204	10	20	20	12.39	16.74	8.76	0.39	0.85	0.68	2.54948e-09	-4.14731	down
F01_cb8967_c14/f1p0/1866	99	100	18	0	0	0	4.15	4.24	0.93	0	0	0	4.10957e-05	#NAME?	down
F01_cb8981_c5/f1p0/1859	18	29	28	0	0	2	0.77	1.25	1.5	0	0	0.12	0.000466037	-5.26288	down
F01_cb9071_c16/f1p0/1449	928	909	490	90	54	99	64.59	64.62	42.4	7.19	4.68	6.94	4.56259e-05	-3.12057	down
F01_cb9123_c16/f1p0/1523	308	466	309	0	0	0	16.59	25.49	20.72	0	0	0	2.04087e-22	#NAME?	down
F01_cb9143_c2/f1p0/2055	276	17	215	0	0	1	10.41	0.66	10.13	0	0	0.04	0.00360745	-9.09521	down
F01_cb9172_c7/f5p1/1413	768	462	420	0	0	9	45.3	27.77	30.84	0	0	0.55	1.58848e-18	-7.5263	down
F01_cb9180_c14/f1p1/1909	4	0	4	156	136	143	0.17	0	0.21	7.26	6.88	5.84	1.66215e-11	5.78161	up
F01_cb9193_c1/f1p0/2128	101	174	53	315	350	530	3.66	6.32	2.38	12.88	15.51	18.93	0.0235339	2.07861	up
F01_cb936_c0/f6p1/1687	615	448	224	21	50	9	29.26	21.58	13.28	1.18	2.96	0.44	8.02641e-06	-3.68421	down
F01_cb9372_c2/f1p1/2074	26	20	15	6	0	0	0.99	0.77	0.73	0.26	0	0	0.0499746	-3.33407	down
F01_cb9516_c0/f1p0/2142	187	253	208	11	8	6	6.79	9.27	9.36	0.48	0.39	0.23	1.91024e-09	-4.55207	down
F01_cb9524_c7/f1p0/1792	279	248	254	59	36	79	12.41	11.16	14.06	2.99	2.02	3.5	0.0187784	-2.08915	down
F01_cb9564_c2/f1p0/2121	66	75	50	9	3	2	2.61	2.99	2.45	0.44	0.19	0.09	0.00042881	-3.65157	down
F01_cb9565_c10/f1p0/2103	0	0	30	97	42	102	0	0	1.39	4.1	1.96	3.75	0.00103368	2.79927	up
F01_cb9565_c6/f1p0/2089	52	92	28	14	0	14	1.93	3.46	1.31	0.6	0	0.53	0.0488241	-2.54541	down
F01_cb9604_c123/f2p2/1860	0	0	11	49	64	121	0.03	0	0.62	2.38	3.36	5.1	1.27138e-05	4.24956	up
F01_cb9609_c0/f5p0/1755	214	279	145	0	4	0	9.72	12.85	8.2	0	0.24	0	3.76925e-15	-6.85188	down
F01_cb9615_c13/f1p0/1327	19	0	0	54	54	36	1.3	0	0	4.19	4.55	2.44	0.00565326	3.14573	up
F01_cb9686_c7/f1p0/1942	0	0	5	17	15	34	0	0	0.3	0.89	0.88	1.55	0.00525609	3.53981	up
F01_cb968_c7/f1p1/3572	64	89	52	0	0	0	1.32	1.82	1.35	0	0	0	1.00805e-09	#NAME?	down
F01_cb9788_c113/f1p0/3290	80	100	160	3	3	10	1.77	2.22	4.41	0.08	0.08	0.22	0.00503979	-4.39814	down
F01_cb9788_c125/f1p0/2172	77	71	72	0	0	0	2.8	2.6	3.25	0	0	0	4.08481e-10	#NAME?	down
F01_cb9873_c47/f1p0/1037	1	5	7	116	199	155	0.14	0.52	0.84	11.68	21.6	13.71	1.42274e-06	5.28682	up
F01_cb9901_c0/f2p0/2094	76	69	137	0	0	0	2.81	2.59	6.33	0	0	0	1.5699e-05	#NAME?	down
F01_cb9901_c1/f1p0/2030	87	100	277	0	1	1	3.36	3.89	13.2	0	0.05	0.04	0.0252776	-7.76091	down
F01_cb9959_c2/f1p0/1498	41	35	21	1	0	3	2.25	1.99	1.43	0.06	0	0.16	0.000462907	-4.57835	down
F01_cb9981_c9/f1p0/1266	15	35	32	0	0	3	1.04	2.47	2.72	0	0	0.21	0.00067178	-4.80634	down
F02_cb10002_c7/f1p0/2977	37	9	25	105	125	135	0.94	0.24	0.8	2.98	3.83	3.33	0.00477569	2.46198	up
F02_cb10060_c12/f2p1/1868	51	48	33	144	160	195	2.17	2.06	1.75	6.9	8.34	8.17	0.0236965	2.08333	up
F02_cb10124_c8/f1p0/1599	0	0	0	41	127	91	0	0	0	2.36	7.92	4.59	9.94253e-05	Inf	up
F02_cb1028_c1/f9p1/2583	54	35	25	223	154	202	1.59	1.03	0.91	7.38	5.52	5.84	0.00159042	2.48697	up
F02_cb1028_c11/f1p0/1761	0	0	0	186	155	151	0	0	0	9.52	8.63	6.77	2.19315e-17	Inf	up
F02_cb10292_c5/f3p0/1825	210	135	39	2489	2019	2761	9.14	5.94	2.12	122.45	107.68	118.82	3.17591e-05	4.44219	up
F02_cb10318_c15/f1p2/1729	10	52	53	152	132	130	0.5	2.51	3.13	8.1	7.61	6.05	0.0469986	1.95022	up
F02_cb10389_c3/f1p0/1831	33	59	17	0	0	9	1.47	2.64	0.94	0	0	0.41	0.00484248	-3.52536	down
F02_cb10420_c3/f1p0/1852	0	0	0	216	71	175	0	0	0	10.95	3.91	7.76	3.53272e-14	Inf	up
F02_cb10478_c0/f5p0/3545	187	157	125	859	618	919	3.86	3.25	3.22	19.99	15.65	18.68	0.00409746	2.4785	up
F02_cb10478_c42/f1p0/2625	9	16	16	55	56	83	0.26	0.46	0.57	1.78	1.97	2.35	0.0451175	2.34549	up
F02_cb10478_c45/f1p0/2630	2	0	1	30	23	61	0.08	0	0.04	1.03	0.85	1.79	9.63564e-06	5.26913	up
F02_cb10478_c46/f1p0/3200	0	0	0	112	98	115	0	0	0	2.93	2.78	2.62	1.02313e-13	Inf	up
F02_cb10478_c47/f1p0/2322	0	0	0	38	20	25	0	0	0	1.43	0.84	0.83	1.89811e-06	Inf	up
F02_cb10478_c61/f1p0/2121	0	0	0	35	25	33	0	0	0	1.47	1.16	1.22	6.4349e-07	Inf	up
F02_cb10486_c2/f1p0/1616	17	28	35	4	0	3	0.89	1.43	2.23	0.27	0	0.16	0.0193326	-3.57237	down
F02_cb10589_c13/f1p0/1793	3	5	0	150	32	139	0.13	0.24	0	7.56	1.8	6.12	0.000153055	5.53032	up
F02_cb10589_c4/f1p0/1917	11	35	20	181	104	211	0.51	1.53	1.1	8.72	5.45	8.91	8.10813e-05	3.03117	up
F02_cb10632_c10/f1p0/1749	0	0	1	47	41	41	0	0	0.06	2.43	2.3	1.86	1.81631e-07	6.87155	up
F02_cb10632_c18/f1p0/1120	0	12	3	29	27	46	0	0.98	0.3	2.62	2.64	3.65	0.0217947	2.99759	up
F02_cb10645_c1/f1p0/1754	41	50	42	0	4	2	1.87	2.32	2.38	0	0.26	0.1	0.000139905	-4.17932	down
F02_cb10690_c0/f1p0/1903	37	24	56	0	0	0	1.63	1.05	3.02	0	0	0	0.000329737	#NAME?	down
F02_cb1069_c0/f1p1/3995	0	0	0	68	29	77	0	0	0	1.39	0.65	1.37	1.00805e-09	Inf	up
F02_cb10759_c20/f2p1/2810	0	0	0	157	102	157	0	0	0	4.72	3.33	4.12	8.14756e-16	Inf	up
F02_cb10759_c76/f1p1/2685	1	0	0	79	77	76	0.03	0	0	2.53	2.69	2.14	2.56814e-10	8.06191	up
F02_cb10781_c0/f1p0/1892	65	55	48	8	1	1	2.7	2.32	2.5	0.38	0.05	0.05	0.000207266	-4.02517	down
F02_cb10785_c8/f1p1/1702	46	89	33	24	2	0	2.17	4.28	1.98	1.29	0.17	0	0.0383615	-2.58998	down
F02_cb10832_c2/f5p0/1823	0	0	0	1405	3229	2576	0	0	0	69.22	172.41	111	2.43074e-13	Inf	up
F02_cb10979_c2/f4p0/1805	78	71	112	32	9	0	3.44	3.17	6.16	1.61	0.5	0	0.0496278	-2.62798	down
F02_cb10979_c6/f1p0/1870	0	83	48	134	155	228	0	3.57	2.56	6.42	8.08	9.54	0.0159779	2.13669	up
F02_cb10981_c27/f1p0/904	35	26	21	7	3	0	3.79	2.88	2.82	0.94	0.42	0.01	0.0496278	-2.88692	down
F02_cb10992_c1/f1p0/1622	0	0	0	43	37	65	0	0	0	2.45	2.29	3.23	6.76049e-09	Inf	up
F02_cb1099_c4/f1p0/3996	0	0	0	73	120	73	0	0	0	1.52	2.71	1.32	1.343e-07	Inf	up
F02_cb11041_c100301/f5p15/2019	9	26	0	991	864	1121	0.35	1.03	0	43.3	40.97	42.85	8.37465e-15	6.72514	up
F02_cb11041_c103234/f2p3/2636	0	0	0	444	477	507	0	0	0	14.34	16.73	14.31	2.17513e-24	Inf	up
F02_cb11041_c10365/f2p8/2130	0	1	0	764	15	1616	0	0.04	0	31.42	0.69	58.06	0.00671018	11.4513	up
F02_cb11041_c103818/f3p12/2121	0	0	0	332	390	517	0	0	0	13.71	17.48	18.69	5.21318e-24	Inf	up
F02_cb11041_c103866/f3p18/3741	0	0	0	20	130	64	0	0	0	0.45	3.11	1.24	0.0344467	Inf	up
F02_cb11041_c104058/f1p28/4606	0	0	0	1269	115	599	0	0	0	22.29	2.2	9.19	0.000136643	Inf	up
F02_cb11041_c104238/f1p8/1757	8	3	3	292	110	193	0.37	0.15	0.19	15.05	6.16	8.71	4.69876e-11	5.50108	up
F02_cb11041_c104270/f2p16/3764	0	0	0	30	24	39	0	0	0	0.66	0.58	0.75	6.43934e-07	Inf	up
F02_cb11041_c10442/f1p0/3081	0	0	0	190	17	64	0	0	0	5.17	0.52	1.53	0.0294232	Inf	up
F02_cb11041_c104921/f40p6/3575	1	0	0	258	62	563	0.02	0	0	5.96	1.56	11.35	0.000900253	9.8651	up
F02_cb11041_c1057/f1p0/1550	5	12	5	718	1020	870	0.27	0.65	0.33	43.56	66.97	46.2	5.67223e-16	7.12475	up
F02_cb11041_c10762/f1p0/2422	0	0	0	22	53	23	0	0	0	0.78	2.04	0.71	0.00791275	Inf	up
F02_cb11041_c111695/f2p2/2507	161	289	86	918	691	645	4.87	8.79	3.23	31.34	25.64	19.25	0.0182458	2.29492	up
F02_cb11041_c112427/f2p1/3741	0	0	0	16	138	322	0	0	0	0.36	3.31	6.18	0.00456017	Inf	up
F02_cb11041_c115582/f1p6/2485	2	0	0	333	52	970	0.08	0	0	11.51	1.97	29.23	0.0276374	9.46657	up
F02_cb11041_c117495/f1p0/2257	0	0	0	129	76	169	0	0	0	4.96	3.19	5.67	7.87907e-15	Inf	up
F02_cb11041_c118446/f1p1/3263	0	0	4	20734	1337	13831	0	0	0.15	574.97	40.3	334.99	7.41931e-06	12.8592	up
F02_cb11041_c12038/f1p0/3894	0	0	0	169	83	43	0	0	0	3.74	2.01	0.84	6.12581e-06	Inf	up
F02_cb11041_c12077/f1p3/3068	0	0	1	438	202	2243	0	0	0.03	11.95	6	53.39	0.024641	11.2336	up
F02_cb11041_c12595/f1p0/3232	0	0	0	67	108	30	0	0	0	1.74	3.03	0.68	0.0015054	Inf	up
F02_cb11041_c12909/f1p0/2441	0	0	0	38	28	18	0	0	0	1.35	1.07	0.55	1.64483e-06	Inf	up
F02_cb11041_c13097/f1p5/2106	0	0	0	45	13	39	0	0	0	1.89	0.59	1.42	4.49556e-07	Inf	up
F02_cb11041_c132044/f7p1/1764	0	0	0	2389	1547	2424	0	0	0	122.38	85.88	108.6	3.27865e-21	Inf	up
F02_cb11041_c132132/f2p0/3735	1	0	0	35	104	349	0.02	0	0	0.77	2.5	6.71	0.0192553	9.07723	up
F02_cb11041_c13321/f1p0/2399	0	0	1	121	206	811	0	0	0.04	4.34	8.01	25.33	0.00373265	9.94637	up
F02_cb11041_c135049/f1p0/2540	0	0	0	22	56	25	0	0	0	0.74	2.06	0.75	0.00812898	Inf	up
F02_cb11041_c135770/f1p0/1835	0	0	0	40	25	105	0	0	0	2	1.36	4.52	0.000399411	Inf	up
F02_cb11041_c13745/f1p4/3000	0	0	0	88	27	35	0	0	0	2.48	0.84	0.87	3.75878e-05	Inf	up
F02_cb11041_c14253/f1p0/2590	0	5	4	25874	675	23895	0	0.15	0.16	846.35	23.99	682.87	0.00220081	12.431	up
F02_cb11041_c14369/f2p0/3099	0	0	0	87	14	111	0	0	0	2.42	0.43	2.69	0.000211963	Inf	up
F02_cb11041_c1437/f1p0/3294	1	1	0	15	15	23	0.02	0.02	0	0.38	0.41	0.51	0.00194505	4.99544	up
F02_cb11041_c143949/f1p0/1809	0	0	0	58	18	54	0	0	0	2.88	1.01	2.38	2.31654e-08	Inf	up
F02_cb11041_c14644/f1p2/4792	0	0	0	172	16	155	0	0	0	2.9	0.29	2.28	0.000233979	Inf	up
F02_cb11041_c15098/f1p0/3810	0	1	0	103	69	361	0	0.02	0	2.23	1.62	6.8	0.00324266	9.34377	up
F02_cb11041_c15237/f2p0/3031	0	0	0	25	27	21	0	0	0	0.71	0.81	0.51	5.82633e-06	Inf	up
F02_cb11041_c15321/f1p0/3821	0	0	0	26	35	18	0	0	0	0.57	0.83	0.35	3.11226e-05	Inf	up
F02_cb11041_c1571/f2p0/3944	64	119	133	1026	696	935	1.2	2.23	3.11	21.67	15.98	17.24	6.16363e-05	3.1502	up
F02_cb11041_c1572/f1p0/2594	14	41	32	278	226	235	0.42	1.21	1.18	9.13	8.09	6.77	7.17621e-06	3.21935	up
F02_cb11041_c15726/f1p0/3286	0	0	0	126	46	43	0	0	0	3.2	1.28	0.96	8.60139e-06	Inf	up
F02_cb11041_c1576/f1p0/2259	0	0	0	1287	535	1209	0	0	0	52.79	23.8	43.35	1.03196e-24	Inf	up
F02_cb11041_c1584/f1p0/1313	0	2	0	20	28	37	0	0.15	0	1.48	2.23	2.44	4.30482e-05	5.78994	up
F02_cb11041_c16382/f1p0/1289	0	0	1	28	27	29	0	0	0.08	2.11	2.2	1.91	1.14864e-05	6.25405	up
F02_cb11041_c16752/f1p6/2390	0	0	0	28	21	52	0	0	0	1.04	0.84	1.67	2.90423e-07	Inf	up
F02_cb11041_c17038/f1p1/3510	0	0	0	66	28	70	0	0	0	1.57	0.74	1.44	1.92337e-09	Inf	up
F02_cb11041_c17283/f1p1/4009	0	0	0	155	105	56	0	0	0	3.34	2.45	1.06	2.99918e-09	Inf	up
F02_cb11041_c17919/f1p1/4402	0	0	0	608	78	126	0	0	0	11.19	1.58	2.04	0.0170953	Inf	up
F02_cb11041_c18120/f1p1/2848	2	0	0	1283	278	2222	0.06	0	0	40.04	9.42	60.56	3.93482e-06	10.9662	up
F02_cb11041_c18589/f5p11/4407	1	0	2	60	3765	2761	0.02	0	0.05	1.11	75.41	44.38	0.00202472	11.1738	up
F02_cb11041_c18595/f1p0/2718	0	0	0	180	78	402	0	0	0	5.63	2.65	10.96	1.19717e-05	Inf	up
F02_cb11041_c18604/f1p0/3395	0	0	0	107	22	76	0	0	0	2.62	0.6	1.64	4.876e-06	Inf	up
F02_cb11041_c18660/f1p0/3528	0	0	0	92	29	41	0	0	0	2.17	0.76	0.84	4.28881e-06	Inf	up
F02_cb11041_c19009/f1p2/2617	0	0	0	502	85	575	0	0	0	17.09	3.16	17.08	2.43751e-07	Inf	up
F02_cb11041_c19399/f1p0/2443	0	0	0	143	361	44	0	0	0	5.03	13.77	1.36	0.0344467	Inf	up
F02_cb11041_c1950/f1p0/2324	0	0	0	53	56	136	0	0	0	2	2.29	4.44	6.71891e-08	Inf	up
F02_cb11041_c20053/f2p9/3722	0	0	0	91	13	59	0	0	0	2.02	0.32	1.15	0.000467021	Inf	up
F02_cb11041_c20337/f1p0/2759	0	3	0	89	42	227	0	0.08	0	2.76	1.43	6.1	0.00409746	7.17916	up
F02_cb11041_c20540/f1p0/2437	0	0	0	33	73	52	0	0	0	1.17	2.82	1.62	1.5699e-05	Inf	up
F02_cb11041_c20550/f1p0/3477	1	0	1	51	369	866	0.02	0	0.03	1.21	9.54	17.97	0.00314589	9.33104	up
F02_cb11041_c20788/f1p0/3738	0	0	0	411	19	1027	0	0	0	9.04	0.47	19.7	0.00982508	Inf	up
F02_cb11041_c20862/f1p1/2024	126	41	162	3	3	4	4.84	1.59	7.76	0.13	0.15	0.15	0.0331217	-5.00835	down
F02_cb11041_c20976/f1p0/4231	0	0	0	112	18	83	0	0	0	2.16	0.38	1.4	4.8287e-05	Inf	up
F02_cb11041_c21040/f1p2/2476	0	0	1	201	29	129	0	0	0.04	6.97	1.09	3.9	0.000177407	8.23683	up
F02_cb11041_c2115/f1p0/1396	0	0	0	54	58	80	0	0	0	3.67	4.26	4.76	3.15916e-10	Inf	up
F02_cb11041_c21372/f1p1/2031	0	0	0	19	17	18	0	0	0	0.82	0.8	0.68	7.64042e-05	Inf	up
F02_cb11041_c2245/f1p1/3716	2	4	2	155	67	158	0.04	0.08	0.07	3.43	1.61	3.06	2.56814e-10	5.69052	up
F02_cb11041_c2251/f1p0/4316	0	0	0	39	13	26	0	0	0	0.83	0.31	0.49	3.49522e-06	Inf	up
F02_cb11041_c23316/f1p0/3177	0	0	0	36	13	47	0	0	0	0.97	0.38	1.08	6.9422e-07	Inf	up
F02_cb11041_c23603/f1p0/2959	0	0	0	89	22	43	0	0	0	2.55	0.69	1.08	4.67171e-05	Inf	up
F02_cb11041_c24451/f1p0/2890	0	0	0	176	40	23	0	0	0	5.15	1.28	0.6	0.0424871	Inf	up
F02_cb11041_c2465/f1p2/2054	0	0	11	67	32	46	0	0	0.52	2.86	1.49	1.73	0.000277451	3.53635	up
F02_cb11041_c24789/f1p3/2253	0	0	0	24	15	46	0	0	0	0.95	0.66	1.57	3.36493e-06	Inf	up
F02_cb11041_c24874/f1p0/4637	0	0	0	137	15	166	0	0	0	2.4	0.29	2.54	0.000331896	Inf	up
F02_cb11041_c24976/f1p2/1975	0	0	0	82	74	152	0	0	0	3.69	3.6	5.98	3.4485e-13	Inf	up
F02_cb11041_c24998/f1p0/3346	0	0	0	54	18	39	0	0	0	1.35	0.5	0.85	1.17235e-07	Inf	up
F02_cb11041_c25169/f1p0/3661	0	0	0	42	78	23	0	0	0	0.95	1.91	0.47	0.00590532	Inf	up
F02_cb11041_c26140/f1p4/2420	0	0	0	53	74	50	0	0	0	1.91	2.87	1.57	3.0941e-09	Inf	up
F02_cb11041_c26173/f1p2/3589	0	0	0	179	41	77	0	0	0	4.14	1.04	1.55	4.24998e-05	Inf	up
F02_cb11041_c26236/f1p1/1785	0	0	0	94	48	90	0	0	0	4.75	2.63	3.99	3.28288e-11	Inf	up
F02_cb11041_c2631/f1p0/1533	0	0	0	347	231	336	0	0	0	21.08	15.22	17.86	1.79959e-22	Inf	up
F02_cb11041_c26404/f1p0/2161	0	0	0	32	27	59	0	0	0	1.33	1.19	2.09	6.17908e-08	Inf	up
F02_cb11041_c2647/f1p0/3094	1	0	3	14	21	48	0.03	0	0.11	0.38	0.62	1.13	0.00966102	4.28101	up
F02_cb11041_c26539/f1p3/3356	0	0	0	56	17	120	0	0	0	1.39	0.45	2.58	0.00202472	Inf	up
F02_cb11041_c2670/f1p0/1819	44	39	70	501	305	449	1.98	1.78	3.86	25.19	16.65	19.75	9.00867e-06	3.07388	up
F02_cb11041_c26710/f1p3/3883	0	0	0	18	55	31	0	0	0	0.38	1.28	0.58	0.00553377	Inf	up
F02_cb11041_c2675/f1p0/1454	1	1	0	34	59	48	0.06	0.06	0	2.27	4.19	2.74	1.41575e-06	6.46823	up
F02_cb11041_c2680/f1p0/2277	7	3	6	47	36	47	0.26	0.11	0.26	1.82	1.51	1.56	0.00498062	3.09418	up
F02_cb11041_c2681/f1p0/2496	22	18	7	128	92	119	0.67	0.55	0.26	4.41	3.45	3.58	0.000516876	3.03463	up
F02_cb11041_c2685/f1p0/3338	13	7	1	89	79	115	0.29	0.15	0.03	2.23	2.15	2.51	1.43115e-05	3.97018	up
F02_cb11041_c2845/f1p0/2343	517	214	327	55	62	50	16.8	7.02	13.24	2.03	2.5	1.63	0.0193687	-2.52289	down
F02_cb11041_c2889/f1p0/2329	7	23	8	105	46	100	0.24	0.77	0.36	3.92	1.87	3.25	0.00328596	2.8805	up
F02_cb11041_c2891/f1p0/1507	2	6	0	36	36	46	0.16	0.37	0	2.25	2.43	2.5	0.000340121	4.20582	up
F02_cb11041_c2901/f1p0/2623	3	10	12	80	36	113	0.11	0.29	0.45	2.6	1.27	3.21	0.000555157	3.20645	up
F02_cb11041_c3008/f1p0/2509	0	0	0	79	42	87	0	0	0	3.16	1.82	3.05	1.32551e-10	Inf	up
F02_cb11041_c3184/f1p0/2574	1	3	0	169	67	175	0.03	0.09	0	5.64	2.43	5.1	1.32183e-12	6.9401	up
F02_cb11041_c3204/f1p0/1982	4	7	1	207	125	198	0.18	0.32	0.09	9.77	6.42	8.17	8.64432e-12	5.69257	up
F02_cb11041_c3307/f1p1/3468	0	0	0	115	85	92	0	0	0	2.75	2.21	1.92	7.94789e-13	Inf	up
F02_cb11041_c3308/f1p1/2825	0	2	0	27	16	36	0	0.05	0	0.83	0.53	0.96	8.45851e-05	5.626	up
F02_cb11041_c3313/f1p0/1307	0	0	0	138	84	144	0	0	0	10.21	6.79	9.38	1.13173e-14	Inf	up
F02_cb11041_c3314/f1p0/1915	0	0	0	93	15	87	0	0	0	4.36	0.79	3.55	4.99678e-05	Inf	up
F02_cb11041_c3315/f1p0/1938	0	0	0	51	20	34	0	0	0	2.34	1	1.37	1.99706e-07	Inf	up
F02_cb11041_c3316/f1p0/1962	0	0	0	198	136	206	0	0	0	8.94	6.66	8.15	3.57898e-18	Inf	up
F02_cb11041_c3317/f1p1/2984	3	0	0	65	24	160	0.08	0	0	1.82	0.75	3.89	0.0206369	6.46658	up
F02_cb11041_c3393/f1p0/2734	0	0	0	842	617	840	0	0	0	26.69	21.24	23.27	1.03196e-24	Inf	up
F02_cb11041_c3517/f1p0/2698	0	1	0	82	37	69	0	0.03	0	2.57	1.26	1.89	3.60698e-09	7.87485	up
F02_cb11041_c3646/f1p0/1605	0	0	0	35	25	53	0	0	0	2.02	1.61	2.68	9.56808e-08	Inf	up
F02_cb11041_c3647/f1p0/2174	0	0	0	63	28	73	0	0	0	2.51	1.21	2.53	1.92337e-09	Inf	up
F02_cb11041_c37067/f5p0/2068	0	0	0	164	125	212	0	0	0	7	5.79	7.91	1.78235e-17	Inf	up
F02_cb11041_c37345/f2p7/2623	0	0	0	27	85	231	0	0	0	0.89	3.03	6.56	0.0030868	Inf	up
F02_cb11041_c37622/f3p5/1803	99	0	0	4959	4046	5316	4.35	0	0	247.44	218.85	232.04	7.16516e-07	7.35775	up
F02_cb11041_c37899/f4p0/1317	140	78	51	723	561	607	9.03	5.13	4.15	53.06	44.52	39.02	0.000112031	2.97839	up
F02_cb11041_c3790/f1p0/2765	15	19	21	101	142	185	0.41	0.53	0.73	3.12	4.74	4.97	0.000101533	3.0786	up
F02_cb11041_c37915/f2p1/1830	1	0	0	115	44	265	0.04	0	0	5.64	2.35	11.41	0.000679577	8.82319	up
F02_cb11041_c38411/f1p0/1729	9	12	5	393	439	740	0.42	0.56	0.29	20.61	24.95	33.96	3.2256e-15	6.10137	up
F02_cb11041_c38613/f1p0/2070	6	12	8	340	158	388	0.26	0.46	0.4	14.61	7.36	14.56	1.6667e-12	5.18426	up
F02_cb11041_c3879/f1p0/2741	25	3	0	51	69	50	0.69	0.11	0	1.58	2.33	1.37	0.0139097	2.85715	up
F02_cb11041_c39638/f1p0/4003	0	0	0	71	32	74	0	0	0	1.61	0.8	1.45	8.29357e-10	Inf	up
F02_cb11041_c3985/f1p0/1553	7	5	0	221	166	203	0.37	0.27	0	13.19	10.77	10.61	1.07347e-12	5.87229	up
F02_cb11041_c3987/f1p0/2126	27	37	29	264	190	271	0.98	1.38	1.34	10.89	8.53	9.78	1.76382e-05	3.08378	up
F02_cb11041_c3988/f1p0/1776	12	18	11	343	272	382	0.54	0.81	0.61	17.45	14.98	16.98	4.72817e-11	4.75268	up
F02_cb11041_c3996/f1p0/4388	14	6	3	69	37	52	0.23	0.1	0.06	1.26	0.74	0.83	0.00810757	2.93387	up
F02_cb11041_c4019/f1p0/3271	45	48	39	299	174	133	1.02	1.09	1.1	7.62	4.81	2.97	0.00352826	2.33301	up
F02_cb11041_c40308/f2p3/2027	0	0	0	214	196	769	0	0	0	9.31	9.25	29.23	2.39054e-05	Inf	up
F02_cb11041_c40437/f1p3/3063	0	0	0	248	215	835	0	0	0	6.79	6.4	19.97	8.60139e-06	Inf	up
F02_cb11041_c4053/f1p0/1822	0	2	0	18	16	37	0	0.11	0	0.94	0.9	1.6	0.000205513	5.48208	up
F02_cb11041_c4108/f1p0/2377	176	88	4	626	766	899	5.63	2.86	0.18	22.7	30.14	28.47	3.09e-05	3.35055	up
F02_cb11041_c4121/f1p1/2470	0	0	28	667	839	1293	0	0	1.08	23.17	31.67	39.24	1.08759e-15	6.49436	up
F02_cb11041_c4158/f1p0/2990	0	0	0	116	86	138	0	0	0	3.25	2.62	3.38	4.72715e-14	Inf	up
F02_cb11041_c41728/f1p9/2929	0	0	0	68	27	40	0	0	0	1.97	0.85	1.01	1.48436e-08	Inf	up
F02_cb11041_c43040/f1p1/2723	0	0	0	17	16	44	0	0	0	0.53	0.54	1.2	7.66496e-05	Inf	up
F02_cb11041_c43171/f1p0/1929	1	1	4	24	27	32	0.05	0.05	0.25	1.14	1.37	1.29	0.00178368	3.78117	up
F02_cb11041_c43222/f1p0/2333	13	24	6	221	108	247	0.43	0.82	0.28	8.19	4.36	7.99	1.91546e-07	3.92178	up
F02_cb11041_c43465/f1p2/3761	0	4	0	22133	1385	11081	0	0.08	0	511.77	34.82	223.7	2.34149e-05	13.3237	up
F02_cb11041_c43500/f1p0/2749	2	2	0	52	35	81	0.05	0.06	0	1.59	1.16	2.16	6.22761e-07	5.62499	up
F02_cb11041_c43561/f1p0/3751	0	0	0	204	196	96	0	0	0	4.99	5.21	2.05	1.51359e-10	Inf	up
F02_cb11041_c44045/f2p1/2309	5	2	10	34	31	43	0.18	0.09	0.42	1.3	1.29	1.44	0.02634	2.65989	up
F02_cb11041_c4408/f2p2/2117	0	1	1	48	79	80	0	0.04	0.05	1.99	3.55	2.89	5.22189e-09	6.81678	up
F02_cb11041_c44275/f1p6/3614	0	0	0	41	87	18	0	0	0	0.93	2.16	0.36	0.0368693	Inf	up
F02_cb11041_c4428/f3p1/4045	145	387	84	952	875	901	2.59	6.91	1.87	19.19	19.19	15.86	0.0186993	2.40046	up
F02_cb11041_c4436/f1p1/2442	0	286	265	3326	3968	3512	0.01	9	10.28	117.47	152.12	108.39	0.000787922	4.42077	up
F02_cb11041_c44527/f1p0/2920	2474	2121	705	237	195	0	70.03	60.41	24.84	7.62	6.81	0	0.00118566	-3.3411	down
F02_cb11041_c4466/f1p0/2141	11	93	11	211	122	168	0.4	3.41	0.53	8.64	5.44	6.01	0.00795966	2.38991	up
F02_cb11041_c447/f4p0/2449	0	0	0	67	28	88	0	0	0	2.37	1.09	2.71	5.841e-10	Inf	up
F02_cb11041_c4483/f1p0/2697	2	2	7	192	138	201	0.06	0.06	0.24	6.05	4.74	5.52	4.04212e-12	5.56678	up
F02_cb11041_c4492/f1p0/2238	0	0	0	247	946	168	0	0	0	10.64	44.18	6.35	0.0246333	Inf	up
F02_cb11041_c4532/f1p0/4583	4	7	17	768	374	1083	0.08	0.11	0.36	13.99	7.42	17.22	3.90825e-13	6.26203	up
F02_cb11041_c4544/f4p1/3645	0	0	0	364	886	821	0	0	0	8.23	21.76	16.2	3.46958e-11	Inf	up
F02_cb11041_c4550/f1p0/2114	15	24	22	227	225	213	0.57	0.9	1	9.38	10.09	7.72	7.05539e-07	3.58405	up
F02_cb11041_c4565/f1p1/2748	2	9	2	289	173	268	0.07	0.25	0.07	8.92	5.81	7.21	4.44499e-14	6.0307	up
F02_cb11041_c4567/f1p0/3751	240	75	67	2084	1499	2323	4.64	1.45	1.62	45.46	35.56	44.25	2.71417e-05	4.08518	up
F02_cb11041_c4571/f1p0/3675	0	0	0	30	30	38	0	0	0	0.71	0.78	0.8	3.74354e-07	Inf	up
F02_cb11041_c46244/f1p0/2202	0	7	0	57	57	69	0	0.28	0	2.28	2.43	2.38	3.09639e-06	5.08127	up
F02_cb11041_c4625/f1p0/3435	0	0	0	517	224	540	0	0	0	12.34	5.82	11.26	3.2929e-24	Inf	up
F02_cb11041_c4629/f2p0/1872	4	0	0	62	167	84	0.17	0	0.05	2.98	8.66	3.51	0.00773563	6.58214	up
F02_cb11041_c4633/f2p0/1862	0	0	0	115	93	34	0	0	0	5.55	4.88	1.44	2.50346e-06	Inf	up
F02_cb11041_c46488/f1p0/3030	0	2	0	49	43	71	0	0.05	0	1.35	1.29	1.71	8.03758e-08	6.69949	up
F02_cb11041_c46607/f1p0/2985	23	14	6	140	170	97	0.59	0.35	0.19	3.93	5.22	2.39	0.00095387	3.48687	up
F02_cb11041_c46673/f1p1/2666	0	0	0	57	68	55	0	0	0	1.82	2.38	1.53	6.28428e-10	Inf	up
F02_cb11041_c4672/f1p0/2814	67	137	87	0	7	25	1.79	3.63	2.86	0	0.26	0.65	0.00120154	-3.07044	down
F02_cb11041_c47317/f1p0/2274	0	0	1	94	60	110	0	0	0.04	3.7	2.56	3.78	4.58923e-11	7.86253	up
F02_cb11041_c47337/f1p0/1961	0	2	17	41	51	70	0	0.11	0.89	1.86	2.53	2.8	0.00220081	2.99639	up
F02_cb11041_c4741/f1p0/2278	0	0	0	300	24	341	0	0	0	11.41	0.99	11.34	0.000129962	Inf	up
F02_cb11041_c47448/f1p2/4445	0	5	0	20936	208	15131	0	0.1	0	405.58	4.39	255.86	4.05126e-05	13.0522	up
F02_cb11041_c4745/f1p0/2717	134	117	170	44	27	18	3.87	3.39	6.11	1.45	0.96	0.53	0.029549	-2.15291	down
F02_cb11041_c4750/f1p0/2091	0	0	0	108	48	227	0	0	0	4.67	2.25	8.57	1.24429e-05	Inf	up
F02_cb11041_c4767/f1p0/3110	0	0	0	100	96	84	0	0	0	2.68	2.8	1.97	1.45795e-12	Inf	up
F02_cb11041_c4772/f1p0/2794	1	3	1	24	15	29	0.03	0.08	0.03	0.73	0.52	0.77	0.00432119	3.94282	up
F02_cb11041_c47789/f1p0/2779	533	453	569	99	98	83	14.3	12.23	19	3.03	3.24	2.23	0.00383466	-2.34858	down
F02_cb11041_c4821/f1p1/1509	2	14	4	115	88	77	0.11	0.77	0.27	7.15	5.9	4.19	1.13458e-05	4.04595	up
F02_cb11041_c4851/f1p0/1789	6	14	3	318	272	303	0.27	0.63	0.17	16.01	14.89	13.35	4.49821e-13	5.52414	up
F02_cb11041_c48529/f1p0/2417	0	0	4	17	18	37	0	0.02	0.17	0.62	0.73	1.17	0.00129917	3.99779	up
F02_cb11041_c4865/f2p1/2166	6	11	10	94	89	78	0.24	0.41	0.46	3.8	3.93	2.76	0.000200336	3.41067	up
F02_cb11041_c4877/f3p0/2799	26	23	24	205	111	177	0.69	0.62	0.8	6.18	3.64	4.66	0.000207224	2.8403	up
F02_cb11041_c48911/f1p2/4116	0	0	0	303	73	92	0	0	0	6.14	1.61	1.63	0.000205513	Inf	up
F02_cb11041_c49090/f1p1/2417	1	2	2	178	87	194	0.03	0.06	0.08	6.22	3.33	5.93	4.73305e-13	6.57581	up
F02_cb11041_c49581/f1p1/2782	0	0	0	2657	1316	57	0	0	0	90.5	48.7	1.71	0.000138942	Inf	up
F02_cb11041_c49607/f1p6/2914	0	0	1	183	135	143	0	0	0.05	5.33	4.26	3.64	1.00356e-15	8.6977	up
F02_cb11041_c49798/f1p0/1920	0	5	11	42	28	27	0	0.23	0.56	1.95	1.43	1.09	0.0408846	2.58969	up
F02_cb11041_c49923/f1p1/2357	0	1	18	32	39	55	0	0.06	0.75	1.18	1.57	1.77	0.0152891	2.60801	up
F02_cb11041_c50328/f1p3/3113	9	3	4	46	83	77	0.23	0.08	0.14	1.23	2.41	1.8	0.000146237	3.85943	up
F02_cb11041_c50342/f1p2/3870	0	0	0	23	43	36	0	0	0.01	0.5	1.01	0.68	1.19056e-06	Inf	up
F02_cb11041_c50613/f1p0/2565	0	0	0	52	34	95	0	0	0	1.55	1.11	2.44	2.18225e-09	Inf	up
F02_cb11041_c50691/f1p0/1871	0	0	0	67	43	48	0	0	0	3.2	2.23	2.01	2.70655e-09	Inf	up
F02_cb11041_c50802/f1p0/2206	3	6	16	566	359	697	0.11	0.21	0.7	22.53	15.53	24.25	1.47344e-15	5.98246	up
F02_cb11041_c51115/f1p0/2983	0	1	0	6332	74	5290	0	0.04	0	174	2.21	126.98	2.45872e-05	13.7411	up
F02_cb11041_c51528/f1p1/1920	20	16	12	159	148	168	0.82	0.67	0.65	7.32	7.39	6.74	7.96168e-06	3.46289	up
F02_cb11041_c51622/f1p0/3919	0	0	0	339	226	78	0	0	0	7.32	5.31	1.47	4.35257e-07	Inf	up
F02_cb11041_c52907/f2p1/3704	0	3	1	17925	828	4024	0	0.07	0.03	399.64	20.08	78.33	0.0159155	12.5727	up
F02_cb11041_c52927/f1p0/2278	1	11	11	70	75	113	0.05	0.39	0.48	2.8	3.27	3.96	8.10813e-05	3.57409	up
F02_cb11041_c53091/f4p1/2001	0	2	1	154	192	153	0	0.11	0.09	6.82	9.21	5.92	4.66669e-15	7.59092	up
F02_cb11041_c53154/f1p1/3494	0	0	0	562	231	475	0	0	0	13.08	5.86	9.65	3.44348e-24	Inf	up
F02_cb11041_c53171/f2p6/2918	0	1	0	11932	736	8718	0	0.03	0	342.79	22.98	218.77	4.89451e-07	14.6261	up
F02_cb11041_c53446/f2p0/1848	0	0	0	37	35	31	0	0	0	1.79	1.86	1.31	2.25667e-07	Inf	up
F02_cb11041_c53723/f1p0/2609	1	0	1	55	24	78	0.03	0	0.04	1.79	0.85	2.22	1.24789e-07	6.23599	up
F02_cb11041_c54196/f1p0/3017	0	0	0	446	130	221	0	0	0	12.37	3.93	5.36	2.00785e-09	Inf	up
F02_cb11041_c54981/f1p0/2651	0	0	0	84	14	68	0	0	0	2.71	0.51	1.9	6.29885e-05	Inf	up
F02_cb11041_c55096/f1p3/3432	0	0	0	42824	5088	23280	0	0	0.01	1035.25	133.74	491.39	0.0256691	Inf	up
F02_cb11041_c55215/f1p2/3259	0	0	0	15540	1411	7434	0	0	0	433.65	42.79	181.19	9.05578e-07	Inf	up
F02_cb11041_c55221/f1p0/1378	45	49	50	225	82	224	2.84	3.14	3.91	16.13	6.36	14.07	0.0263497	1.93095	up
F02_cb11041_c55492/f1p0/2907	0	0	0	63	19	112	0	0	0	2	0.67	3.12	0.000181338	Inf	up
F02_cb11041_c56459/f1p0/2644	0	0	0	44	60	24	0	0	0	1.4	2.07	0.67	0.000106982	Inf	up
F02_cb11041_c56472/f1p1/2876	4	9	0	882	630	931	0.11	0.25	0	25.97	20.15	23.95	1.02965e-18	7.84514	up
F02_cb11041_c565/f3p0/2979	1	7	12	235	170	321	0.04	0.18	0.38	6.63	5.22	7.9	2.46347e-12	5.18034	up
F02_cb11041_c56539/f1p2/3591	0	0	0	49	14	93	0	0	0	1.11	0.35	1.84	0.00115448	Inf	up
F02_cb11041_c56615/f1p0/3336	0	0	0	132	81	139	0	0	0	3.24	2.16	2.98	2.52989e-14	Inf	up
F02_cb11041_c56817/f1p0/2764	0	2	5	41	22	29	0	0.08	0.17	1.3	0.75	0.8	0.00151491	3.67022	up
F02_cb11041_c57147/f1p1/1463	0	0	0	278	818	63	0	0	0	17.88	56.91	3.59	0.0461819	Inf	up
F02_cb11041_c57378/f1p1/3267	0	0	0	30	20	105	0	0	0	0.76	0.55	2.35	0.0121965	Inf	up
F02_cb11041_c58154/f1p0/3362	2	3	0	28	33	25	0.04	0.07	0	0.69	0.89	0.54	0.000670081	4.43609	up
F02_cb11041_c58167/f1p1/2464	0	0	0	59	18	49	0	0	0	2.03	0.7	1.5	3.22832e-08	Inf	up
F02_cb11041_c58338/f1p0/3735	0	0	0	137	36	216	0	0	0	3.09	0.9	4.24	1.01141e-05	Inf	up
F02_cb11041_c58344/f1p0/2533	132	161	117	39	9	35	3.93	4.84	4.34	1.34	0.35	1.05	0.0260081	-2.2471	down
F02_cb11041_c58706/f1p0/3277	0	0	0	105	134	23	0	0	0	3.08	4.26	0.58	0.00185026	Inf	up
F02_cb11041_c58907/f1p0/3238	0	0	0	306	71	46	0	0	0	8.55	2.18	1.12	0.012001	Inf	up
F02_cb11041_c59175/f1p1/2220	7	6	0	31	21	31	0.25	0.23	0	1.2	0.88	1.07	0.0458547	2.92201	up
F02_cb11041_c62599/f1p4/3102	0	0	0	1503	324	142	0	0	0	40.96	9.61	3.4	0.0068276	Inf	up
F02_cb11041_c65081/f1p9/1941	0	0	0	32	44	69	0	0	0	1.51	2.23	2.77	6.62833e-09	Inf	up
F02_cb11041_c720/f2p1/2381	0	0	0	60	13	37	0	0	0	2.17	0.54	1.19	7.20791e-05	Inf	up
F02_cb11041_c72917/f3p2/2387	0	0	0	78	37	64	0	0	0	2.84	1.48	2.04	7.26294e-10	Inf	up
F02_cb11041_c74193/f3p1/2030	0	0	0	252	214	229	0	0	0	10.96	10.12	8.71	1.77498e-20	Inf	up
F02_cb11041_c74358/f2p0/1806	0	0	0	23	41	52	0	0	0	1.16	2.24	2.28	6.87204e-08	Inf	up
F02_cb11041_c7447/f9p1/1876	0	0	8	432	168	333	0	0	0.42	20.57	8.69	13.87	1.99858e-17	6.66228	up
F02_cb11041_c74834/f1p3/1421	66	118	53	1981	1883	2551	3.89	7.06	3.87	131.87	135.59	148.75	8.43359e-07	4.94319	up
F02_cb11041_c75276/f1p0/1477	22	20	15	0	0	0	1.25	1.18	1.08	0	0	0	0.000175879	#NAME?	down
F02_cb11041_c75312/f1p0/2478	0	0	0	67	34	43	0	0	0	2.56	1.4	1.43	7.33559e-09	Inf	up
F02_cb11041_c75356/f1p0/1921	0	2	0	34	25	24	0	0.08	0	1.62	1.29	1	5.3313e-05	5.74401	up
F02_cb11041_c7555/f2p0/2096	40	86	63	439	464	552	1.48	3.21	2.93	18.39	21.07	20.2	2.39054e-05	3.09284	up
F02_cb11041_c75670/f1p0/2126	0	0	0	77	61	83	0	0	0	3.17	2.71	2.96	5.81314e-11	Inf	up
F02_cb11041_c7572/f4p0/2690	0	6	3	304	164	358	0	0.17	0.1	9.58	5.62	9.86	3.20048e-16	6.6474	up
F02_cb11041_c7578/f2p1/2093	13	0	10	123	85	126	0.48	0	0.48	5.16	3.87	4.64	2.82332e-06	3.87207	up
F02_cb11041_c75845/f1p0/1377	3	0	0	27	16	20	0.21	0	0	1.94	1.23	1.25	0.00151673	4.56093	up
F02_cb11041_c77262/f1p0/1705	2	17	8	64	93	99	0.12	0.84	0.52	3.45	5.38	4.66	0.000247031	3.45576	up
F02_cb11041_c77522/f1p0/2056	0	0	0	339	265	529	0	0	0	14.57	12.37	19.88	1.01656e-23	Inf	up
F02_cb11041_c77524/f1p0/2121	0	0	0	124	66	93	0	0	0	5.59	3.21	3.65	1.50453e-12	Inf	up
F02_cb11041_c77783/f1p0/2012	1	3	0	17	32	58	0.04	0.12	0	0.76	1.55	2.24	0.0015526	5.06072	up
F02_cb11041_c78291/f1p0/1478	2	0	1	129	107	219	0.11	0	0.07	8.18	7.35	12.17	4.20742e-14	7.28196	up
F02_cb11041_c78716/f1p1/1652	0	6	1	62	58	50	0	0.34	0.12	3.47	3.51	2.47	6.40428e-06	4.90297	up
F02_cb11041_c79636/f1p0/1689	5	7	17	99	35	130	0.24	0.34	1	5.32	2.04	6.11	0.00226692	3.12502	up
F02_cb11041_c7967/f2p21/3782	1	0	0	40	33	70	0.02	0	0	0.88	0.79	1.33	6.71891e-08	7.3164	up
F02_cb11041_c80032/f1p0/2088	0	2	0	38	28	16	0	0.13	0	1.87	1.5	0.71	5.87678e-05	5.74537	up
F02_cb11041_c806/f3p1/2561	29	36	17	176	82	114	0.86	1.09	0.65	5.89	2.99	3.34	0.0119563	2.32976	up
F02_cb11041_c80610/f1p0/1677	0	0	0	45	68	25	0	0	0	2.45	4.04	1.2	0.000415205	Inf	up
F02_cb11041_c80669/f1p0/2389	50	126	30	395	197	507	1.61	4.04	1.21	14.26	7.72	15.98	0.000635204	2.59633	up
F02_cb11041_c810/f2p1/3042	0	0	2	253	151	323	0	0	0.06	6.97	4.53	7.77	7.5987e-19	8.31461	up
F02_cb11041_c81399/f2p1/2932	27	49	50	420	213	740	0.69	1.25	1.6	12.06	6.66	18.54	0.00165075	3.48339	up
F02_cb11041_c81625/f1p0/2152	0	3	1	111	32	116	0	0.11	0.04	4.51	1.41	4.12	7.50375e-07	6.15438	up
F02_cb11041_c81824/f1p0/1869	0	92	169	624	517	611	0	4.16	9.39	31.54	28.35	27.05	0.000150941	2.7583	up
F02_cb11041_c81926/f1p0/2503	0	3	1	36	39	48	0	0.09	0.04	1.23	1.44	1.43	1.23613e-05	5.17058	up
F02_cb11041_c820/f2p0/1688	0	0	0	63	57	67	0	0	0	3.45	3.35	3.17	4.24214e-10	Inf	up
F02_cb11041_c82103/f1p0/2648	5	7	0	228	146	244	0.14	0.2	0	7.35	5.11	6.89	4.83019e-13	5.94779	up
F02_cb11041_c82512/f1p0/2524	0	1	1	15	19	29	0	0.03	0.04	0.51	0.7	0.86	0.000526348	5.06417	up
F02_cb11041_c82558/f1p0/1771	24	9	15	150	193	199	1.14	0.46	0.88	7.96	11.09	9.2	1.17069e-06	3.62689	up
F02_cb11041_c82629/f1p0/1576	0	0	0	176	172	237	0	0	0	10.32	10.92	12.17	6.54176e-19	Inf	up
F02_cb11041_c82805/f1p0/3038	0	0	0	108	140	117	0	0	0	2.97	4.19	2.81	8.03558e-15	Inf	up
F02_cb11041_c83136/f1p0/3974	11	10	4	89	45	72	0.21	0.18	0.09	1.83	1.02	1.31	0.00149684	3.20096	up
F02_cb11041_c83408/f1p0/2258	0	0	0	39	78	31	0	0	0	1.46	3.19	1.03	0.00160841	Inf	up
F02_cb11041_c83844/f1p0/1514	1	0	0	67	67	115	0.06	0	0	4.29	4.64	6.45	1.05131e-10	8.1344	up
F02_cb11041_c83857/f1p0/2470	0	2	0	124	157	230	0	0.06	0	4.3	5.93	6.97	7.41421e-16	8.36762	up
F02_cb11041_c8406/f4p1/2757	0	0	0	26	17	61	0	0	0	0.8	0.57	1.64	0.000147757	Inf	up
F02_cb11041_c84146/f1p0/1853	13	7	0	221	38	190	0.62	0.34	0	12.08	2.25	9.11	0.00487377	4.63634	up
F02_cb11041_c84456/f1p0/1406	2	4	15	255	126	197	0.12	0.25	1.12	17.25	9.2	11.7	2.03921e-10	4.71284	up
F02_cb11041_c84647/f1p0/1336	12	15	12	373	111	386	0.77	1.01	1	26.71	8.64	24.22	6.85382e-06	4.53631	up
F02_cb11041_c84887/f1p0/2092	41	58	8	195	102	152	1.52	2.17	0.4	8.18	4.66	5.56	0.0136417	2.28921	up
F02_cb11041_c85056/f1p0/2020	4	3	5	113	83	112	0.16	0.12	0.24	4.98	3.97	4.28	9.9017e-08	4.74527	up
F02_cb11041_c85361/f1p0/2349	17	44	16	73	118	115	0.56	1.44	0.66	2.71	4.71	3.72	0.0448391	2.23517	up
F02_cb11041_c85793/f1p0/2788	5	52	8	164	138	278	0.15	1.42	0.29	4.99	4.57	7.37	8.88259e-06	3.40783	up
F02_cb11041_c8648/f1p4/2262	0	0	0	57	21	30	0	0	0	2.21	0.88	1.04	1.49086e-07	Inf	up
F02_cb11041_c86547/f1p3/3530	0	17	0	105	22	109	0	0.35	0	2.43	0.57	2.21	0.012279	4.06528	up
F02_cb11041_c86708/f1p0/2436	0	0	0	52	25	38	0	0	0	1.83	0.97	1.19	8.00919e-08	Inf	up
F02_cb11041_c86781/f1p0/2473	2	9	4	209	136	254	0.08	0.28	0.15	7.25	5.12	7.71	5.46466e-12	5.47427	up
F02_cb11041_c87135/f1p0/1616	15	2	1	402	256	398	0.75	0.1	0.06	22.85	15.76	19.8	3.8583e-15	6.03484	up
F02_cb11041_c87263/f1p0/1854	0	10	0	59	56	56	0	0.45	0	3.01	3.09	2.51	3.8369e-05	4.47645	up
F02_cb11041_c87326/f1p0/2258	2	8	6	212	188	232	0.07	0.3	0.26	8.1	7.8	7.74	3.25183e-12	5.43448	up
F02_cb11041_c87683/f1p0/1324	0	0	0	201	153	168	0	0	0	14.63	12.04	10.72	6.6955e-18	Inf	up
F02_cb11041_c88322/f1p0/3206	0	0	0	190	74	214	0	0	0	4.87	2.07	4.79	1.21009e-15	Inf	up
F02_cb11041_c89084/f1p0/1633	22	0	0	36	43	51	1.1	0	0	2.07	2.64	2.54	0.0263782	2.76586	up
F02_cb11041_c89220/f1p0/2637	0	0	0	53	50	71	0	0	0	1.71	1.76	2	9.61229e-10	Inf	up
F02_cb11041_c89835/f1p0/1982	0	0	0	94	26	152	0	0	0	4.2	1.27	5.93	3.02568e-05	Inf	up
F02_cb11041_c90256/f1p9/3554	0	0	0	112	69	80	0	0	0	2.61	1.75	1.64	5.38331e-12	Inf	up
F02_cb11041_c90521/f1p7/2639	0	0	0	34	41	33	0	0	0	1.11	1.44	0.95	1.37002e-07	Inf	up
F02_cb11041_c9072/f1p0/3104	0	0	0	183	14	201	0	0	0	4.99	0.41	4.78	0.000437155	Inf	up
F02_cb11041_c922/f2p0/2728	9	28	21	150	83	172	0.25	0.78	0.72	4.65	2.79	4.67	0.000332703	2.89338	up
F02_cb11041_c99777/f1p3/3163	0	0	0	21	13	39	0	0	0	0.56	0.39	0.92	6.35484e-06	Inf	up
F02_cb11060_c4/f2p0/1848	64	55	37	170	235	339	2.73	2.37	1.96	8.24	12.36	14.4	0.00202399	2.41887	up
F02_cb11070_c6/f1p0/1449	0	0	0	52	32	66	0	0	0	3.44	2.28	3.8	4.78614e-09	Inf	up
F02_cb11070_c7/f1p0/1595	0	7	10	104	66	92	0	0.42	0.69	6.18	4.27	4.81	9.3415e-06	3.96667	up
F02_cb11070_c8/f1p0/1788	1	0	0	22	26	47	0.04	0	0	1.15	1.44	2.11	3.78982e-06	6.7461	up
F02_cb11093_c39/f1p0/3184	1	3	2	206	148	238	0.02	0.07	0.06	5.34	4.15	5.37	7.07993e-15	6.74852	up
F02_cb11093_c41/f1p0/2444	4	2	3	62	40	47	0.12	0.06	0.12	2.21	1.52	1.45	7.81929e-05	4.13782	up
F02_cb11093_c42/f1p0/2285	2	1	1	62	46	68	0.07	0.03	0.04	2.35	1.89	2.25	3.74354e-07	5.57882	up
F02_cb11140_c6/f1p0/1613	2	0	0	276	120	178	0.16	0	0	17.18	8.12	9.69	8.30438e-17	8.31278	up
F02_cb11197_c1/f1p0/1826	4	0	0	218	136	250	0.18	0	0	11.3	7.69	11.34	5.24095e-16	7.39294	up
F02_cb11288_c0/f5p1/1814	2	7	3	158	237	217	0.09	0.31	0.16	7.83	12.73	9.4	2.32205e-11	5.90374	up
F02_cb11298_c3/f1p0/725	0	0	0	67	36	50	0	0	0	11.59	6.71	7.65	3.85048e-09	Inf	up
F02_cb1129_c2/f1p0/1857	37	52	36	163	126	171	1.55	2.24	1.92	7.76	6.53	7.14	0.0336437	2.01798	up
F02_cb11375_c4/f1p0/1229	0	12	0	42	24	56	0	0.93	0	3.39	2.12	3.94	0.00190274	3.66525	up
F02_cb11516_c4/f6p0/1591	175	35	11	601	661	742	8.97	1.82	0.71	34.85	41.53	37.66	1.04449e-05	3.39114	up
F02_cb11517_c8/f1p0/1586	6	2	0	26	17	27	0.33	0.15	0	1.53	1.11	1.42	0.019613	3.33485	up
F02_cb11548_c0/f6p1/1548	9	30	3	411	368	473	0.47	1.62	0.2	24.64	23.9	24.86	4.41559e-12	5.18005	up
F02_cb11548_c18/f1p0/2692	0	2	0	44	28	26	0	0.08	0	1.41	0.98	0.72	1.19428e-05	5.97683	up
F02_cb11614_c7/f1p0/2125	7	5	6	93	24	98	0.27	0.2	0.29	3.85	1.11	3.55	0.00246566	3.60086	up
F02_cb11645_c37/f2p1/846	54	82	83	0	29	0	6.34	10.06	12.08	0.12	4.31	0	0.00819668	-2.51736	down
F02_cb11780_c8/f1p0/1760	0	0	0	111	44	87	0	0	0	5.72	2.46	3.95	1.84344e-11	Inf	up
F02_cb11891_c0/f1p0/1667	0	0	12	35	12	38	0	0	0.78	2.01	0.77	1.92	0.0277163	2.6018	up
F02_cb11978_c3/f1p0/2275	17	16	21	102	77	108	0.59	0.55	0.92	3.91	3.19	3.61	0.00816971	2.48989	up
F02_cb11989_c2/f1p0/1759	0	20	17	56	72	51	0	0.91	0.95	2.86	3.99	2.28	0.0451731	2.42835	up
F02_cb11997_c8/f1p3/1387	14	0	0	424	393	741	0.91	0	0	29.41	29.48	45.02	8.31458e-18	6.96468	up
F02_cb12101_c9/f1p0/1266	0	2	0	72	70	107	0	0.17	0	6.23	6.5	8.12	5.24053e-10	7.31873	up
F02_cb12140_c1/f1p0/1480	81	29	22	416	189	226	4.54	1.67	1.55	26.38	13	12.58	0.000127948	2.78484	up
F02_cb12140_c2/f1p0/1382	37	34	22	181	111	84	2.24	2.11	1.65	12.41	8.25	5.07	0.0259547	2.1754	up
F02_cb12199_c1/f3p1/1654	82	150	86	1305	521	719	3.99	7.4	5.2	72.18	31.21	34.8	7.68693e-05	3.12327	up
F02_cb1222_c35/f1p0/2530	23	64	22	0	6	0	0.76	2.12	0.93	0	0.27	0	0.00593543	-3.68274	down
F02_cb12259_c2/f1p0/2367	4	0	3	17	21	24	0.15	0	0.14	0.64	0.86	0.78	0.0261991	3.19904	up
F02_cb12299_c11/f1p0/483	0	0	0	112	105	91	0.03	0	0	40.73	40.07	29.69	2.68387e-13	Inf	up
F02_cb12299_c2/f1p0/1637	28	43	24	205	167	229	1.41	2.16	1.52	11.51	10.19	11.24	0.000198414	2.82057	up
F02_cb122_c17/f1p0/3671	0	0	0	806	338	755	0	0	0	18.64	8.51	15.23	1.03196e-24	Inf	up
F02_cb122_c24/f1p0/4038	0	0	2	3956	2214	4190	0	0	0.04	80.84	49.2	74.72	5.48054e-16	12.1507	up
F02_cb122_c37/f1p1/6416	0	1	0	8582	509	8489	0	0.01	0	105.52	6.82	91.06	3.98418e-07	14.3401	up
F02_cb122_c38/f1p0/6325	0	0	0	1564	96	1104	0	0	0	19.79	1.33	12.19	1.79104e-05	Inf	up
F02_cb122_c42/f1p1/5508	0	1	2	1756	366	1224	0	0.01	0.03	25.43	5.78	15.48	1.10529e-09	10.0384	up
F02_cb12352_c4/f1p1/1622	122	115	104	10	38	19	6.11	5.84	6.46	0.6	2.37	0.97	0.0296595	-2.0995	down
F02_cb12435_c3/f1p0/1612	1	0	3	160	138	129	0.05	0	0.19	9.04	8.44	6.38	4.54132e-13	6.67819	up
F02_cb12449_c1/f1p0/1791	0	3	0	39	22	31	0	0.13	0	2	1.21	1.37	6.81964e-05	5.27879	up
F02_cb12455_c2/f2p0/1539	56	172	33	0	0	0	3.01	9.28	2.2	0	0	0	0.00103368	#NAME?	down
F02_cb12456_c1/f8p0/745	0	6	2	1251	1802	1362	0	0.91	0.38	204.62	315.3	196.49	1.00168e-17	9.37738	up
F02_cb12465_c3/f1p0/982	0	1	0	31	24	32	0	0.1	0	3.34	2.79	3.03	8.60139e-06	6.79976	up
F02_cb12618_c0/f1p0/1574	0	0	0	57	14	49	0	0	0	3.35	0.92	2.56	2.05692e-06	Inf	up
F02_cb12624_c1/f1p0/1520	48	81	53	325	260	257	2.59	4.46	3.55	19.91	17.26	13.81	0.00251056	2.3681	up
F02_cb12683_c6/f1p0/1094	3	3	0	63	84	84	0.25	0.25	0	5.88	8.46	6.88	1.0206e-07	5.57114	up
F02_cb12812_c0/f2p0/1543	0	23	2	114	62	113	0	1.24	0.13	6.86	4.04	5.95	4.02695e-05	3.81063	up
F02_cb12858_c1/f1p0/2176	0	0	0	18	18	24	0	0	0	0.72	0.78	0.84	3.25018e-05	Inf	up
F02_cb12876_c3/f1p0/1411	0	0	0	2267	674	1065	0	0	0	155.78	50.09	64.11	1.83305e-12	Inf	up
F02_cb12907_c4/f1p0/1273	32	25	10	289	246	255	2.2	1.73	0.83	22.13	20.36	17.08	1.99706e-07	3.76032	up
F02_cb12954_c5/f1p0/1888	3	4	0	38	27	57	0.14	0.18	0	1.82	1.42	2.36	0.000140831	4.37502	up
F02_cb13089_c1/f1p0/1768	2	1	0	61	41	91	0.1	0.07	0	3.14	2.32	4.07	4.90874e-08	6.21274	up
F02_cb13101_c3/f1p1/1473	12	4	4	180	104	224	0.68	0.25	0.29	11.48	7.18	12.44	1.31638e-09	4.76974	up
F02_cb13101_c7/f1p0/1591	2	0	0	42	22	50	0.1	0	0	2.43	1.38	2.54	2.97939e-06	5.9722	up
F02_cb13127_c0/f1p0/1468	1	3	0	28	21	27	0.06	0.17	0	1.79	1.45	1.51	0.00085461	4.5583	up
F02_cb13170_c0/f2p0/1369	0	0	0	20	32	54	0	0	0	1.4	2.45	3.34	4.60884e-07	Inf	up
F02_cb13175_c2/f1p0/1036	2	9	2	31	55	34	0.17	0.87	0.22	3.16	5.93	3.05	0.0278036	3.52536	up
F02_cb13240_c37/f3p22/7240	0	1	3	12517	2402	9853	0	0.02	0.04	136.64	28.56	93.82	2.14229e-08	12.4657	up
F02_cb13240_c42/f2p28/7378	0	0	0	2771	798	2733	0	0	0.01	29.66	9.3	25.52	1.37738e-18	Inf	up
F02_cb13240_c43/f2p0/1417	0	0	0	4539	206	3197	0	0	0	303.39	14.9	187.22	5.38521e-06	Inf	up
F02_cb13240_c45/f2p32/6553	1	1	4	14048	2186	19851	0.01	0.02	0.05	170.15	28.83	209.74	1.65865e-05	12.4196	up
F02_cb13240_c46/f2p24/7037	0	0	1	24907	2402	17082	0	0	0.01	280.06	29.41	167.55	6.11096e-05	15.1737	up
F02_cb13240_c47/f1p0/1448	0	0	1	2128	162	1653	0	0	0.07	138.52	11.47	94.21	6.27734e-06	11.6741	up
F02_cb13240_c85/f1p15/6393	0	0	4	28129	748	24323	0	0	0.07	353.66	10.24	266.78	0.00194175	13.4144	up
F02_cb13240_c93/f1p26/5269	0	0	0	712	727	563	0	0	0	10.85	12.06	7.49	1.03196e-24	Inf	up
F02_cb13240_c94/f1p31/5199	0	1	0	8047	3306	9298	0	0.02	0	124.57	55.7	125.61	1.27088e-10	14.6362	up
F02_cb13300_c30/f5p0/1905	18	17	7	124	118	170	0.77	0.74	0.38	5.81	6	6.96	1.80373e-05	3.48153	up
F02_cb13324_c0/f14p2/1391	236	153	67	2963	7511	4342	14.21	9.41	5.01	202.71	555.71	260.19	0.00718853	5.30316	up
F02_cb13341_c14/f1p0/2870	2	6	2	31	20	38	0.07	0.17	0.07	0.91	0.67	0.98	0.00906919	3.33301	up
F02_cb13341_c9/f2p1/3327	8	8	9	66	44	105	0.18	0.18	0.27	1.66	1.2	2.3	0.00101078	3.16794	up
F02_cb13346_c16/f1p0/1237	0	19	0	62	105	131	0	1.41	0	4.95	9.04	9.19	8.7054e-06	4.36203	up
F02_cb13346_c6/f1p0/1492	0	0	0	55	34	57	0	0	0	3.45	2.31	3.13	6.35054e-09	Inf	up
F02_cb13354_c1/f1p0/3194	3	7	3	34	34	68	0.07	0.16	0.09	0.89	0.96	1.55	0.00117575	3.55509	up
F02_cb13374_c0/f2p0/1399	0	0	0	53	81	30	0	0	0	3.65	6.02	1.83	0.000253738	Inf	up
F02_cb13374_c1/f1p0/1417	0	0	0	66	30	146	0	0	0	4.4	2.16	8.5	0.000115098	Inf	up
F02_cb13419_c0/f1p0/1391	3	1	1	61	48	100	0.18	0.06	0.07	4.22	3.55	6.02	1.5293e-07	5.49972	up
F02_cb13421_c1/f2p1/1392	48	73	142	391	187	319	2.93	4.48	10.66	26.74	13.85	19.15	0.0356974	1.76682	up
F02_cb13458_c4/f1p0/1276	13	0	0	102	71	98	0.9	0	0	7.84	5.87	6.59	1.08142e-06	4.55366	up
F02_cb13490_c2/f10p0/796	0	0	1	36	969	617	0	0	0.16	5.3	153.02	80.11	0.00850589	10.6442	up
F02_cb13510_c1/f1p0/1321	0	0	0	51	13	19	0	0	0	3.73	1.05	1.25	0.00230785	Inf	up
F02_cb13572_c0/f2p0/1358	15	4	0	73	53	49	0.93	0.25	0	5.15	4.04	3.03	0.001184	3.4303	up
F02_cb13620_c4/f1p0/1322	0	22	42	116	74	164	0	1.46	3.39	8.53	5.87	10.54	0.00316741	2.43426	up
F02_cb13667_c1/f1p1/2063	5	55	26	170	113	197	0.19	2.08	1.21	7.22	5.21	7.32	0.00117431	2.63247	up
F02_cb13787_c10/f1p2/1324	6	11	27	1952	1084	972	0.4	0.76	2.16	142.12	85.34	62.02	1.39696e-13	6.50643	up
F02_cb13817_c1/f8p3/1035	0	3	0	5554	909	1691	0	0.32	0	559.17	98.68	149.51	0.000107249	11.6894	up
F02_cb13817_c8/f1p2/1077	0	0	0	2076	410	945	0	0	0	198.05	42.18	79.14	7.50575e-08	Inf	up
F02_cb13824_c1/f1p0/1258	0	0	1	19	24	28	0	0	0.08	1.48	2.02	1.91	5.06292e-05	6.01855	up
F02_cb13848_c13/f1p1/853	11	2	3	1094	1237	1570	1.33	0.31	0.54	147.08	178.45	185.75	3.26877e-17	8.07691	up
F02_cb13848_c6/f3p1/876	0	0	0	221	254	232	0	0	0	28.3	34.88	26.05	1.23445e-20	Inf	up
F02_cb1391_c43/f1p1/2688	25	32	26	398	228	312	0.73	0.92	0.94	12.85	8	8.81	2.43751e-07	3.60858	up
F02_cb13928_c2/f2p0/381	0	0	0	102	279	126	0	0	0	73.87	203.7	84.69	0.000323469	Inf	up
F02_cb14084_c0/f2p0/841	0	0	0	168	173	234	0	0	0	22.88	25.29	28.03	8.98658e-19	Inf	up
F02_cb14113_c0/f11p4/726	0	0	0	62	28	107	0	0	0	10.7	5.1	16.1	7.13612e-07	Inf	up
F02_cb14133_c4/f1p0/573	0	0	0	16	19	33	0	0	0	4.4	5.36	7.8	1.1265e-05	Inf	up
F02_cb14152_c1/f1p0/1728	0	0	0	16	14	27	0	0	0	0.84	0.83	1.27	5.06649e-05	Inf	up
F02_cb14175_c2/f1p0/1006	0	2	4	42	31	89	0	0.22	0.47	4.44	3.6	8.24	8.44071e-05	4.70753	up
F02_cb14216_c2/f1p0/797	0	12	23	100	58	69	0	1.63	3.65	14.67	9.26	9.02	0.00480865	2.68629	up
F02_cb14223_c1/f1p0/3333	7	9	18	94	35	68	0.15	0.21	0.49	2.33	0.93	1.46	0.0138815	2.51866	up
F02_cb14246_c6/f1p0/1167	0	0	0	114	146	447	0	0	0	9.82	13.54	33.62	1.56185e-05	Inf	up
F02_cb14247_c1/f1p0/1540	0	0	0	54	64	88	0	0	0	3.24	4.16	4.62	1.36746e-10	Inf	up
F02_cb14267_c2/f1p0/2229	7	1	0	21	31	25	0.24	0.03	0	0.85	1.32	0.87	0.00979485	3.52327	up
F02_cb14277_c1/f1p0/1287	25	34	53	457	166	268	1.67	2.33	4.41	34.36	13.53	17.65	0.000224127	3.0058	up
F02_cb14304_c4/f1p1/2018	0	0	0	1635	683	1111	0	0	0	71.49	32.43	42.5	2.17513e-24	Inf	up
F02_cb14304_c6/f1p0/1311	0	0	0	1309	427	643	0	0	0	98.25	34.63	42.34	2.57037e-13	Inf	up
F02_cb1433_c0/f1p0/3801	5	5	5	35	16	44	0.11	0.11	0.13	0.76	0.38	0.85	0.0356081	2.72148	up
F02_cb14410_c0/f1p0/1119	0	12	6	52	36	52	0	0.97	0.59	4.69	3.5	4.11	0.00527175	3.11436	up
F02_cb14415_c0/f1p0/1270	34	32	24	153	169	200	2.31	2.23	2.06	11.79	14.08	13.49	0.000633216	2.69485	up
F02_cb14415_c3/f1p0/1312	23	55	55	183	110	239	1.56	3.65	4.47	13.57	8.78	15.52	0.013811	2.06053	up
F02_cb14469_c0/f2p0/977	0	0	0	37	16	22	0	0	0	4.04	1.88	2.11	4.876e-06	Inf	up
F02_cb14469_c2/f1p0/1083	0	0	0	24	17	29	0	0	0	2.29	1.74	2.46	8.84901e-06	Inf	up
F02_cb14508_c1/f1p0/1357	8	17	2	592	294	609	0.5	1.08	0.16	42.05	22.58	37.9	5.74589e-15	6.0121	up
F02_cb14520_c3/f1p0/1184	24	19	24	165	80	103	1.81	1.45	2.29	13.94	7.31	7.61	0.00530139	2.44862	up
F02_cb14525_c1/f1p0/790	19	12	27	101	63	90	2.47	1.63	4.34	15.06	10.06	11.82	0.0394576	2.16069	up
F02_cb14562_c0/f1p0/906	3	0	1	29	13	29	0.32	0	0.13	3.55	1.7	3.1	0.00148939	4.19264	up
F02_cb14655_c1/f1p0/2613	0	0	0	73	48	89	0	0	0	2.41	1.7	2.55	1.16549e-10	Inf	up
F02_cb14696_c1/f1p0/2685	0	0	0	83	30	83	0	0	0	2.63	1.04	2.3	2.70755e-10	Inf	up
F02_cb14696_c2/f1p0/5673	0	0	1	88	60	98	0	0	0.02	1.25	0.93	1.21	1.27789e-10	7.76849	up
F02_cb14740_c2/f1p0/1235	0	2	1	82	62	52	0	0.15	0.09	6.55	5.37	3.66	3.89605e-08	6.21252	up
F02_cb14752_c0/f1p0/1198	5	0	4	49	34	29	0.41	0	0.42	4.14	3.12	2.14	0.000925013	3.6694	up
F02_cb14756_c0/f1p0/775	0	0	0	27	19	17	0	0	0	4.2	3.23	2.33	2.15456e-05	Inf	up
F02_cb14779_c1/f1p0/1302	29	0	17	88	67	57	1.93	0	1.43	6.55	5.39	3.71	0.0437273	2.26758	up
F02_cb14794_c0/f1p0/854	32	0	29	80	96	89	3.72	0.02	4.19	10.65	13.67	10.47	0.0356081	2.1663	up
F02_cb14826_c1/f1p0/3033	14	1	1	132	79	111	0.34	0.02	0.03	3.64	2.37	2.68	3.62755e-07	4.48215	up
F02_cb14864_c0/f1p0/923	0	0	0	29	24	24	0	0	0	3.47	3.12	2.47	3.67574e-06	Inf	up
F02_cb14932_c1/f1p0/2416	1	5	4	166	126	136	0.03	0.16	0.16	5.91	4.87	4.23	1.07384e-10	5.54013	up
F02_cb14992_c2/f1p0/4936	5	6	5	46	40	46	0.08	0.1	0.09	0.76	0.72	0.67	0.0044325	3.18042	up
F02_cb15063_c10/f1p0/1008	215	167	187	51	55	0	23.31	18.69	25.16	6.35	7.38	0	0.00596213	-2.21018	down
F02_cb15073_c131/f1p0/652	22	22	4	346	68	410	4.83	5.3	1.13	86.29	17.98	90.9	0.0111763	4.2336	up
F02_cb15073_c292/f1p1/613	15	19	15	1769	1631	1675	3.07	4.13	3.87	401.77	393.36	337.24	1.31781e-12	6.84334	up
F02_cb15073_c400/f1p0/508	0	0	0	3540	1922	3458	0	0	0	1211.11	689.46	1058.66	1.10493e-18	Inf	up
F02_cb15185_c4/f1p0/871	3	1	1	70	50	58	0.35	0.2	0.26	9.03	7.03	6.58	8.5157e-07	5.29288	up
F02_cb15245_c3/f2p0/712	2	1	0	152	120	164	0.3	0.16	0	26.7	22.52	25.39	9.01667e-14	7.41822	up
F02_cb15250_c1/f1p0/1040	1	0	4	115	104	96	0.09	0	0.43	11.54	11.19	8.42	3.81652e-10	5.90471	up
F02_cb15290_c101/f26p0/466	0	0	0	53	15	21	0	0	0	21.57	6.71	7.69	0.000514426	Inf	up
F02_cb15290_c508/f1p0/680	1	0	0	142	97	46	0.19	0	0	31.18	22.6	8.93	3.78538e-07	8.36382	up
F02_cb15290_c599/f1p0/1162	0	0	0	211	332	619	0	0	0	18.24	30.99	46.93	8.93889e-12	Inf	up
F02_cb15290_c601/f1p1/1126	18	0	0	436	337	1397	1.42	0	0	39.11	32.67	109.92	0.00137228	7.03338	up
F02_cb15290_c807/f1p0/632	0	0	0	31	25	22	0	0	0	6.7	5.74	4.38	3.25486e-06	Inf	up
F02_cb15295_c30/f1p19/7263	0	0	1	223	689	2286	0	0	0.01	2.44	8.17	21.7	0.00100614	11.4532	up
F02_cb15347_c0/f2p0/344	0	0	0	77	23	75	0	0	0	79.5	23.3	73.69	6.93986e-09	Inf	up
F02_cb15353_c2/f1p0/946	0	6	0	52	27	39	0	0.62	0	5.94	3.39	3.94	9.66432e-05	4.63315	up
F02_cb15353_c3/f1p0/834	0	0	0	34	21	42	0	0	0	4.67	3.09	5.07	4.31917e-07	Inf	up
F02_cb15458_c0/f5p0/396	0	0	2	478	835	146	0	0	1.29	303.74	539.49	85.38	0.00211283	9.48301	up
F02_cb15471_c14/f1p0/491	110	68	57	0	0	0	39.97	27.81	25.38	0	0	0	1.987e-10	#NAME?	down
F02_cb15566_c4/f1p0/538	114	572	195	2386	4027	3831	29.02	157.67	60.79	703.21	1250.47	1006.03	0.00836629	3.79542	up
F02_cb15578_c1/f1p0/942	0	0	0	57	34	31	0	0	0	6.62	4.3	3.18	4.20428e-08	Inf	up
F02_cb15592_c1/f2p1/663	17	4	0	73	44	73	3.08	0.75	0	14.56	9.47	12.83	0.00106881	3.36764	up
F02_cb15602_c0/f2p0/1005	0	0	0	321	272	227	0	0	0	33.66	30.71	20.91	9.53554e-22	Inf	up
F02_cb15627_c7/f1p1/824	0	0	0	27	33	22	0	0	0	3.79	5.04	2.73	1.9709e-06	Inf	up
F02_cb15682_c0/f2p0/477	0	0	1	178	215	46	0	0	0.4	68.49	86.33	15.9	0.000499647	8.71545	up
F02_cb15708_c118/f1p10/5824	0	0	0	991	234	947	0	0	0	13.46	3.47	11.22	3.24583e-12	Inf	up
F02_cb15708_c58/f1p0/1189	0	0	0	2831	771	8661	0	0.06	0	236.78	69.65	635.14	0.000118827	Inf	up
F02_cb15708_c72/f1p0/459	0	0	1	3773	449	4389	0	0	0.65	1639.1	202.6	1720.49	8.00919e-08	12.8057	up
F02_cb15708_c99/f1p53/5985	0	0	0	248	37	115	0	0	0	3.31	0.54	1.34	0.000328696	Inf	up
F02_cb15763_c0/f5p0/562	17	9	4	63	67	62	3.99	2.39	1.38	17.25	19.15	14.95	0.00797106	2.88939	up
F02_cb1591_c4/f3p1/2561	0	0	0	50	26	16	0	0	0	1.69	0.97	0.47	2.29124e-05	Inf	up
F02_cb16008_c0/f1p0/638	10	5	7	69	54	63	1.88	1	1.62	14.95	12.44	12.09	0.00165189	3.18432	up
F02_cb16032_c14/f10p1/1223	0	4	0	522	249	341	0	0.32	0	42.08	21.74	24.17	2.39023e-20	8.45233	up
F02_cb16032_c9/f1p0/1261	88	77	50	2152	1655	1666	6.08	5.47	4.29	168.63	140.13	114.44	3.23648e-07	4.83278	up
F02_cb16174_c0/f2p0/1091	12	6	0	216	128	245	1.01	0.5	0	20.2	12.93	20.1	3.80123e-11	5.24017	up
F02_cb16174_c1/f2p0/375	1	0	1	48	27	38	0.63	0	0.76	36.69	20.82	27.47	3.1666e-06	5.8032	up
F02_cb16174_c2/f2p0/739	1	0	0	24	39	32	0.24	0	0	4.02	6.97	4.8	3.583e-06	6.80857	up
F02_cb16219_c0/f3p0/800	5	15	72	221	69	207	0.64	1.99	11.34	32.25	10.79	26.71	0.0281074	2.29985	up
F02_cb16219_c2/f3p0/741	0	0	0	286	107	422	0	0	0	47.17	18.88	61.41	1.35054e-10	Inf	up
F02_cb16219_c4/f2p0/779	0	0	0	92	61	105	0	0	0	14.02	9.96	14.14	6.6914e-12	Inf	up
F02_cb16219_c5/f1p0/765	0	0	0	122	95	274	0	0	0	18.97	15.82	37.56	2.54948e-09	Inf	up
F02_cb16241_c1/f2p0/780	0	0	0	127	104	112	0	0	0	19.42	16.99	15.03	3.53272e-14	Inf	up
F02_cb16258_c7/f9p0/469	3	3	1	91	97	153	1.02	1.14	0.42	36.64	40.49	55.16	6.37449e-10	5.8056	up
F02_cb16307_c3/f1p0/731	4	0	0	26	53	35	0.59	0	0	4.37	9.53	5.2	0.00247842	5.09545	up
F02_cb16388_c7/f2p0/442	0	0	0	515	670	640	0	0.42	0	239.72	322.83	269.82	1.03196e-24	Inf	up
F02_cb16479_c1/f1p0/706	0	0	0	37	25	42	0	0	0	6.59	4.8	6.74	2.14788e-07	Inf	up
F02_cb16523_c8/f1p0/1200	0	0	0	27	31	19	0	0	0	2.21	2.74	1.36	3.53215e-06	Inf	up
F02_cb16530_c9/f1p0/653	368	460	177	80	146	0	65.2	86.25	38.65	16.5	31.73	0	0.0336692	-1.8021	down
F02_cb16649_c3/f5p0/463	0	0	0	617	755	720	0	0	0	255.3	324.9	268.56	1.03196e-24	Inf	up
F02_cb16649_c4/f5p0/466	0	0	1	680	443	517	0	0	0.42	277.07	188.07	189.44	6.89916e-24	10.5182	up
F02_cb16766_c1/f2p0/1263	0	0	0	406	293	508	0	0	0	31.45	24.56	34.48	5.72999e-24	Inf	up
F02_cb16766_c2/f1p0/903	0	0	0	26	24	43	0	0	0	3.38	3.29	4.86	6.43934e-07	Inf	up
F02_cb16766_c3/f1p0/1160	0	0	0	186	140	226	0	0	0	16.12	13.14	17.19	2.17256e-18	Inf	up
F02_cb16766_c5/f1p0/1001	0	0	0	55	31	38	0	0	0	5.82	3.54	3.54	3.59599e-08	Inf	up
F02_cb16766_c6/f1p0/1061	0	0	0	250	187	271	0	0	0	24.29	19.65	23.11	1.33026e-20	Inf	up
F02_cb16796_c1/f2p0/597	4	2	1	111	129	117	0.95	0.54	0.31	26.79	32.9	24.92	2.4636e-10	5.88322	up
F02_cb16887_c11/f1p8/6243	1	0	0	170	2279	1958	0.01	0	0	2.18	31.61	21.77	0.000118668	12.3895	up
F02_cb16887_c12/f1p2/4910	0	0	0	94	1392	699	0	0	0	1.55	24.87	10.01	0.00503979	Inf	up
F02_cb1704_c9/f1p0/3475	0	0	0	44	28	70	0	0.01	0	1.06	0.74	1.47	8.62783e-09	Inf	up
F02_cb17143_c0/f7p0/527	0	0	0	74	88	51	0	0	0	22.95	28.66	14.16	2.28818e-09	Inf	up
F02_cb17167_c15/f1p0/610	0	0	2	58	63	80	0	0	0.49	13.49	15.41	16.35	7.72749e-09	6.50877	up
F02_cb17297_c1/f1p0/774	0	0	1	48	42	44	0	0	0.16	7.4	6.85	5.95	1.24789e-07	6.92435	up
F02_cb17414_c1/f3p0/569	0	0	0	115	105	97	0	0	0	30.3	29.27	22.81	1.56141e-13	Inf	up
F02_cb17414_c6/f1p0/622	0	0	0	34	62	54	0	0	0	7.87	15.19	10.97	4.85387e-08	Inf	up
F02_cb17431_c3/f1p0/613	0	4	0	22	22	40	0	0.97	0	5.19	5.42	8.19	0.000375739	4.74189	up
F02_cb17486_c0/f1p0/1062	0	4	1	55	44	49	0	0.35	0.11	5.35	4.61	4.18	5.25534e-06	5.13539	up
F02_cb17619_c1/f3p1/575	0	0	0	28	15	20	0	0	0	7.46	4.29	4.75	2.19711e-05	Inf	up
F02_cb17619_c4/f1p1/647	0	5	0	47	17	43	0	1.03	0	10.59	4.05	8.67	0.000111236	4.72163	up
F02_cb17762_c0/f1p0/957	1	3	1	97	158	117	0.1	0.3	0.12	10.86	19.04	11.51	7.97659e-08	6.4873	up
F02_cb17849_c0/f4p0/962	0	0	1	38	36	46	0	0	0.12	4.32	4.35	4.52	3.8e-07	6.75864	up
F02_cb17888_c2/f1p0/1002	39	119	69	14	0	19	3.68	11.35	7.9	1.57	0	1.82	0.0268924	-2.76477	down
F02_cb17906_c3/f1p0/1278	0	0	0	41	46	46	0	0	0	3.05	3.7	3	1.61929e-08	Inf	up
F02_cb17919_c1/f1p0/1055	0	2	0	83	68	60	0	0.17	0	8.03	7.09	5.09	4.34222e-09	7.09962	up
F02_cb17955_c0/f5p0/547	3	3	2	64	44	31	0.8	0.92	0.72	18.42	13.33	7.9	8.02934e-05	4.28511	up
F02_cb17964_c120/f1p0/733	7	1	1	187	492	1056	1.02	0.15	0.18	31.25	87.92	155.73	0.000183913	7.74728	up
F02_cb17974_c2/f1p0/1139	0	0	0	92	104	92	0	0	0	8.17	9.92	7.21	8.73094e-13	Inf	up
F02_cb17991_c3/f1p0/1273	0	0	0	31	35	22	0	0	0	2.37	2.89	1.48	1.01954e-06	Inf	up
F02_cb18047_c6/f1p0/1090	65	104	109	299	311	324	5.4	8.81	11.2	28.1	31.52	26.73	0.0415957	1.8689	up
F02_cb18065_c11/f1p1/825	14	22	4	82	102	53	1.73	2.88	0.61	11.74	15.62	6.68	0.0356081	2.87048	up
F02_cb18065_c2/f3p1/915	37	52	34	933	1518	895	3.9	5.66	4.43	111.81	195.44	94.32	0.000101169	4.99007	up
F02_cb18149_c0/f1p0/525	1	0	0	57	32	30	0.27	0	0	17.98	10.46	8.43	4.21387e-07	7.0708	up
F02_cb18155_c16/f3p25/7087	0	0	0	193	3473	1864	0	0	0	2.16	42.21	18.15	0.00131296	Inf	up
F02_cb18159_c1/f1p0/1031	0	0	0	33	37	25	0	0	0	3.4	4.04	2.26	4.86836e-07	Inf	up
F02_cb18168_c3/f1p0/769	0	0	0	43	15	25	0	0	0	6.69	2.5	3.43	1.9539e-06	Inf	up
F02_cb18176_c1/f3p0/947	4	5	2	250	365	248	0.4	0.51	0.25	28.49	44.75	24.84	4.21449e-09	6.54557	up
F02_cb18176_c22/f1p0/827	0	0	0	44	63	42	0	0	0	6.07	9.33	5.1	2.45519e-08	Inf	up
F02_cb18176_c4/f2p0/654	12	0	18	64	89	65	2.26	0	4.11	13.14	19.47	11.76	0.00248467	2.88759	up
F02_cb18176_c5/f2p0/715	22	13	60	454	345	326	3.38	2.08	11.29	79.42	64.44	50.41	1.48451e-07	3.55652	up
F02_cb18266_c1/f1p0/571	118	101	81	582	467	578	26.54	24.34	22.4	151.16	128.43	133.49	0.0010004	2.57727	up
F02_cb18296_c0/f1p0/948	1	0	3	86	90	66	0.1	0	0.37	9.79	11.02	6.6	8.03784e-09	5.88093	up
F02_cb18428_c2/f1p0/775	1	16	30	84	84	95	0.17	2.26	4.75	12.44	13.32	12.26	0.00745264	2.50794	up
F02_cb18429_c1/f1p0/959	0	0	0	216	167	201	0	0	0	24.18	20.12	19.78	6.77383e-19	Inf	up
F02_cb1842_c13/f1p0/3622	0	12	8	63	45	65	0	0.24	0.22	1.42	1.1	1.28	0.00175624	3.23332	up
F02_cb1842_c20/f1p0/2800	0	0	0	116	88	181	0	0	0	3.65	3.02	4.97	4.11589e-15	Inf	up
F02_cb1842_c24/f1p1/2674	0	0	0	35	13	22	0	0	0	1.12	0.48	0.63	9.04262e-06	Inf	up
F02_cb18438_c0/f4p0/618	0	0	2	24	19	28	0	0	0.48	5.4	4.54	5.58	0.000200382	4.98665	up
F02_cb18538_c0/f2p0/553	0	0	0	21	13	20	0	0	0	5.85	3.82	4.96	7.82367e-05	Inf	up
F02_cb18577_c1/f1p0/1061	0	0	0	137	121	170	0	0	0	13.27	12.62	14.4	4.26989e-16	Inf	up
F02_cb18622_c1/f1p0/1131	0	0	0	38	36	49	0	0	0	3.39	3.47	3.92	3.84428e-08	Inf	up
F02_cb18652_c1/f1p0/1174	0	0	0	65	39	56	0	0	0	5.53	3.58	4.18	2.4181e-09	Inf	up
F02_cb18687_c1/f1p0/682	0	0	0	28	16	16	0	0	0	5.39	3.3	2.77	3.28936e-05	Inf	up
F02_cb18698_c0/f4p0/606	0	0	2	292	884	637	0	0	0.5	68.11	218.84	131.79	1.72474e-06	9.75878	up
F02_cb18721_c0/f1p0/1210	0	0	0	231	114	181	0	0	0	21.03	11.2	14.43	6.78869e-18	Inf	up
F02_cb18736_c0/f2p0/784	0	0	2	23	15	23	0	0	0.33	3.47	2.42	3.06	0.000682999	4.75781	up
F02_cb18736_c1/f1p0/720	13	4	7	116	237	205	1.95	0.63	1.3	20.05	43.77	31.28	7.96551e-05	4.70329	up
F02_cb18761_c1/f1p0/979	0	0	0	30	28	18	0	0	0	3.26	3.27	1.72	4.02549e-06	Inf	up
F02_cb18774_c1/f1p0/1164	10	2	4	74	79	134	0.77	0.23	0.42	6.43	7.42	10.12	1.85661e-06	4.26991	up
F02_cb18774_c3/f1p1/5327	0	0	0	2195	478	2176	0	0	0	33.18	7.86	28.69	1.07978e-12	Inf	up
F02_cb18824_c0/f1p0/769	45	28	16	159	109	161	6.15	3.97	2.79	24.78	18.25	22.1	0.00518931	2.4219	up
F02_cb18890_c1/f2p0/1003	0	0	0	242	167	25	0	0	0	25.44	18.91	2.31	0.000284653	Inf	up
F02_cb18896_c0/f2p0/646	1	1	0	31	15	23	0.18	0.19	0	6.44	3.32	4.23	0.000257561	5.34662	up
F02_cb18896_c11/f1p0/991	0	4	2	260	146	237	0	0.41	0.23	27.71	16.78	22.17	1.41958e-15	6.88485	up
F02_cb18896_c17/f1p0/927	12	0	2	66	72	43	1.26	0	0.25	7.77	9.13	4.53	0.000141969	3.87308	up
F02_cb18896_c21/f1p0/962	0	6	0	169	79	123	0	0.6	0	18.89	9.49	12.09	6.87159e-11	6.2784	up
F02_cb19041_c0/f1p0/943	3	0	0	53	53	75	0.3	0	0	6.04	6.54	7.61	9.51294e-08	6.10049	up
F02_cb19041_c3/f1p0/1008	18	68	3	458	377	496	1.69	6.44	0.37	47.96	42.48	45.62	1.20238e-08	4.20455	up
F02_cb19165_c1/f2p1/786	2	3	1	220	195	154	0.29	0.41	0.17	33.16	31.49	20.45	1.29426e-14	6.79732	up
F02_cb19165_c10/f1p1/880	0	0	0	23	23	23	0	0	0	2.9	3.13	2.58	9.63564e-06	Inf	up
F02_cb19165_c11/f1p1/607	0	0	0	136	187	158	0	0	0	31.66	46.34	32.72	6.79458e-17	Inf	up
F02_cb19165_c12/f1p0/907	6	11	1	307	225	191	0.68	1.3	0.16	37.13	29.25	20.33	9.59316e-13	5.60696	up
F02_cb19165_c8/f1p0/865	0	0	0	60	42	57	0	0	0	7.8	5.86	6.52	2.54948e-09	Inf	up
F02_cb19165_c9/f1p0/949	1	2	6	84	105	89	0.1	0.21	0.74	9.55	12.96	8.97	6.72063e-08	4.97208	up
F02_cb19266_c122/f1p0/380	0	0	0	53	52	191	0	0.41	0	39.02	38.68	128.85	0.00040682	Inf	up
F02_cb19266_c127/f1p0/503	12	4	0	153	227	163	3.67	1.47	0	52.63	81.77	50.23	2.46361e-07	5.36971	up
F02_cb19266_c132/f1p0/566	70	125	66	513	574	358	16.18	30.92	18.77	136.49	161.59	84.67	0.00149437	2.68693	up
F02_cb19266_c147/f1p0/496	31	24	18	134	110	113	9.48	8.02	6.92	46.83	40.17	35.47	0.00745759	2.44528	up
F02_cb19266_c164/f1p0/426	1	1	2	134	97	98	0.43	0.49	1.06	68.85	51.51	45.8	6.65194e-11	6.40845	up
F02_cb19266_c54/f2p1/569	112	73	97	371	373	337	25.62	18.07	27.15	97.77	104.03	78.9	0.0148702	2.06383	up
F02_cb19322_c0/f1p0/1116	0	0	0	98	61	92	0	0	0	8.91	5.98	7.34	1.00303e-11	Inf	up
F02_cb19355_c1/f1p0/606	165	221	151	690	944	669	33.29	47.62	37.53	161.17	233.85	138.56	0.0180686	2.30205	up
F02_cb19361_c0/f1p0/714	36	39	14	2	5	2	5.58	6.29	2.75	0.35	1.04	0.32	0.0197698	-2.99021	down
F02_cb1945_c16/f1p0/1941	0	0	0	32	24	55	0	0	0	1.49	1.2	2.23	1.14779e-07	Inf	up
F02_cb19519_c1/f1p0/552	0	0	0	36	27	35	0	0	0	10.06	7.97	8.71	3.78538e-07	Inf	up
F02_cb19524_c0/f2p0/526	2	3	2	45	52	55	0.53	0.87	0.65	13.9	16.9	15.16	1.84465e-05	4.61266	up
F02_cb19526_c0/f1p0/800	4	3	13	117	108	93	0.51	0.4	2.05	17.07	16.89	11.96	1.83395e-06	3.99226	up
F02_cb19526_c1/f1p0/933	3	3	0	58	53	69	0.31	0.32	0	6.75	6.64	7.06	1.75605e-06	5.18	up
F02_cb19623_c0/f2p0/629	0	0	0	311	344	219	0	0	0	67.76	79.69	42.27	9.94424e-17	Inf	up
F02_cb19680_c121/f1p24/6089	0	0	0	1744	195	2803	0	0	0	23.13	2.83	32.42	7.17621e-06	Inf	up
F02_cb19680_c144/f1p21/5958	0	0	0	58	38	101	0	0	0	0.78	0.56	1.18	2.51173e-10	Inf	up
F02_cb19680_c151/f1p0/5675	0	0	0	740	38	205	0	0	0	11.27	0.63	2.73	0.0319329	Inf	up
F02_cb19680_c29/f1p11/5829	0	0	1	81	63	117	0	0	0.02	1.11	0.94	1.4	5.32448e-11	7.85232	up
F02_cb19680_c59/f1p13/4864	0	0	0	119	66	96	0	0	0	1.98	1.21	1.4	1.6787e-12	Inf	up
F02_cb19697_c0/f1p0/5054	0	0	0	218	133	226	0	0	0	3.44	2.29	3.12	9.71273e-19	Inf	up
F02_cb19741_c1/f1p0/4808	0	16	0	540	123	605	0	0.25	0	9.1	2.27	8.9	8.77968e-06	6.58014	up
F02_cb19762_c0/f1p5/5957	2	0	0	309	3411	1008	0.03	0	0	4.14	49.7	11.77	0.044314	11.5767	up
F02_cb19762_c3/f1p0/5137	0	0	0	5381	3339	2660	0	0	0	95.07	64.18	41.02	3.38267e-16	Inf	up
F02_cb2025_c26/f1p0/3054	4	20	26	74	52	106	0.12	0.5	0.81	2.04	1.56	2.54	0.0352956	2.24295	up
F02_cb2028_c6/f1p0/2274	3	0	0	15	25	23	0.11	0	0	0.61	1.09	0.8	0.00146687	4.6248	up
F02_cb2058_c122/f1p0/2530	0	0	0	610	163	221	0	0	0	20.6	5.98	6.53	1.21978e-06	Inf	up
F02_cb2059_c2/f1p0/1717	0	3	3	31	24	54	0	0.17	0.17	1.61	1.4	2.46	0.000192945	4.23245	up
F02_cb2162_c46/f1p0/2513	302	332	182	59	35	38	9.07	10.06	6.82	2.02	1.33	1.15	0.00112839	-2.47039	down
F02_cb2162_c52/f1p0/2526	0	7	7	47	15	29	0	0.22	0.29	1.61	0.56	0.88	0.0347947	2.72513	up
F02_cb2162_c60/f1p0/2435	201	185	133	24	54	29	6.31	5.84	5.2	0.88	2.09	0.91	0.0168329	-2.03531	down
F02_cb2172_c9/f1p0/3462	35	35	35	0	0	0	0.78	0.79	0.97	0	0	0	8.92065e-07	#NAME?	down
F02_cb2179_c6/f1p1/1727	0	6	0	67	111	161	0	0.28	0	3.5	6.29	7.37	2.471e-08	6.19953	up
F02_cb2191_c21/f1p0/3382	13	0	6	43	44	48	0.28	0	0.19	1.08	1.19	1.04	0.00920853	2.91463	up
F02_cb2193_c29/f1p1/3237	280	227	132	0	0	72	6.34	5.16	3.73	0.01	0	1.61	6.27691e-05	-3.12756	down
F02_cb2195_c25/f1p0/1737	4	9	5	70	52	81	0.19	0.44	0.3	3.88	3.1	3.9	0.000222047	3.64295	up
F02_cb2195_c6/f1p0/2281	0	0	0	61	58	84	0	0	0	2.32	2.41	2.81	1.66047e-10	Inf	up
F02_cb2267_c0/f2p0/1256	8	16	16	92	40	66	0.58	1.16	1.38	7.2	3.4	4.57	0.0342408	2.36939	up
F02_cb2288_c23/f1p0/3206	3	0	3	66	44	57	0.09	0	0.11	1.77	1.28	1.33	3.68544e-06	4.79301	up
F02_cb2308_c38/f1p0/4997	116	220	112	742	280	703	1.75	3.31	2.11	12.62	5.18	10.44	0.0212874	2.05765	up
F02_cb2370_c5/f1p1/1956	0	0	0	31	77	35	0	0	0	1.41	3.78	1.38	0.00303519	Inf	up
F02_cb2383_c6/f1p0/7160	16	35	20	255	210	237	0.17	0.37	0.27	2.97	2.66	2.4	1.67295e-06	3.4706	up
F02_cb2485_c144/f1p0/3269	0	1	1	24	20	16	0	0.04	0.03	0.62	0.57	0.37	0.000761098	5.00961	up
F02_cb2485_c68/f1p0/1741	0	7	3	18	28	25	0	0.37	0.18	0.98	1.63	1.18	0.0417629	3.06288	up
F02_cb2529_c5/f1p0/2423	37	0	2	80	55	72	1.18	0	0.11	2.85	2.13	2.24	0.0207585	2.56248	up
F02_cb2619_c10/f1p0/2639	0	41	0	97	44	163	0	1.22	0	3.24	1.61	4.76	0.0399542	3.18463	up
F02_cb2628_c10/f1p2/2011	0	3	0	109	96	128	0	0.12	0	4.83	4.59	4.95	1.61175e-11	7.15677	up
F02_cb2628_c13/f1p1/2111	0	0	1	62	37	71	0	0	0.06	2.59	1.71	2.61	1.05345e-08	7.22304	up
F02_cb2628_c20/f1p0/1492	0	0	0	152	137	125	0	0	0	9.58	9.31	6.89	7.37019e-16	Inf	up
F02_cb2628_c26/f1p0/1285	3	2	6	145	98	150	0.2	0.14	0.55	10.98	8.01	9.95	9.73525e-10	5.15819	up
F02_cb2628_c8/f1p2/2011	0	0	0	52	33	66	0	0	0	2.28	1.57	2.54	4.44982e-09	Inf	up
F02_cb2667_c17/f1p0/2765	0	0	0	112	69	114	0	0	0	3.43	2.3	3.06	7.56922e-13	Inf	up
F02_cb2684_c3/f1p0/2985	9	25	3	149	283	247	0.23	0.63	0.11	4.19	8.66	6.07	6.25231e-05	4.5242	up
F02_cb2844_c1/f1p0/3207	0	0	0	72	161	66	0	0	0	1.89	4.56	1.52	0.000516876	Inf	up
F02_cb286_c9/f1p1/4266	47	69	47	657	396	734	0.8	1.18	1	12.52	8.22	12.21	8.22408e-07	3.56952	up
F02_cb2898_c2/f1p0/3270	17	34	13	0	0	4	0.39	0.78	0.37	0	0	0.1	0.0107908	-3.94701	down
F02_cb2970_c17/f1p0/2270	25	11	0	476	241	304	0.86	0.41	0	18.28	10.03	10.2	7.9443e-12	5.03861	up
F02_cb3080_c0/f1p0/3218	10	15	9	100	52	61	0.23	0.36	0.26	2.59	1.48	1.39	0.00721519	2.78532	up
F02_cb3080_c1/f1p0/2567	8	0	6	39	49	82	0.26	0	0.25	1.3	1.79	2.37	0.000255915	3.63069	up
F02_cb3107_c132/f1p0/2622	33	24	23	144	64	218	0.95	0.71	0.85	4.69	2.27	6.2	0.0121522	2.47358	up
F02_cb3107_c172/f1p0/3024	226	332	195	2312	1079	2627	5.76	8.5	6.19	66.65	33.82	66.16	0.00328028	3.10729	up
F02_cb3107_c214/f1p0/2917	16	14	12	196	87	313	0.42	0.37	0.41	5.62	2.72	7.82	0.000373704	3.89155	up
F02_cb3107_c245/f1p0/1829	39	104	90	576	259	815	1.73	4.57	4.87	28.3	13.8	34.98	0.000548291	2.87582	up
F02_cb3165_c59/f1p0/2839	0	0	0	55	50	61	0	0	0	1.74	1.72	1.67	1.59393e-09	Inf	up
F02_cb3183_c15/f1p0/3150	0	0	0	41	29	30	0	0	0	1.18	0.9	0.75	3.08097e-07	Inf	up
F02_cb3227_c13/f1p0/1940	0	0	0	41	41	67	0	0	0	1.9	2.07	2.7	4.99007e-09	Inf	up
F02_cb3301_c0/f1p0/3165	1	1	2	29	25	39	0.02	0.02	0.06	0.76	0.72	0.9	0.00015644	4.57285	up
F02_cb3355_c1/f1p0/1824	0	0	0	30	41	40	0	0	0	1.52	2.24	1.75	1.06634e-07	Inf	up
F02_cb3355_c4/f1p0/1338	0	0	0	123	72	97	0	0	0	8.84	5.6	6.12	8.73094e-13	Inf	up
F02_cb3393_c8/f1p0/2574	0	0	0	76	79	101	0	0	0	2.52	2.87	2.92	6.71709e-12	Inf	up
F02_cb3418_c7/f1p0/3212	192	107	100	19	4	51	4.41	2.47	2.85	0.51	0.11	1.18	0.0148707	-2.40968	down
F02_cb3455_c44/f1p0/2433	0	22	5	58	37	61	0	0.7	0.21	2.08	1.43	1.91	0.0218483	2.75886	up
F02_cb353_c1/f1p0/4500	8	2	2	53	39	36	0.14	0.05	0.06	0.97	0.77	0.58	0.00126343	3.57215	up
F02_cb3570_c5/f2p2/2657	0	8	0	148	176	102	0	0.24	0	4.75	6.12	2.86	9.95195e-08	6.15388	up
F02_cb3732_c4/f1p0/1618	6	10	4	79	50	87	0.33	0.52	0.28	4.53	3.07	4.34	0.000233979	3.5985	up
F02_cb3732_c7/f1p0/690	0	0	0	56	41	75	0	0	0	10.57	8.17	12.45	1.10529e-09	Inf	up
F02_cb3769_c19/f1p0/863	0	0	0	81	52	55	0	0	0	10.49	7.23	6.27	4.08481e-10	Inf	up
F02_cb3769_c8/f4p2/727	16	8	35	856	432	627	2.42	1.24	6.47	145.77	78.67	94.27	5.82351e-12	4.98626	up
F02_cb3808_c20/f4p2/2630	230	174	153	47	0	0	6.57	5.01	5.46	1.52	0	0	7.17621e-06	-3.56837	down
F02_cb3852_c11/f1p0/1086	3	1	9	79	44	52	0.28	0.13	0.99	7.49	4.54	4.37	0.000131094	3.68765	up
F02_cb3933_c6/f1p0/3046	9	7	16	102	79	117	0.25	0.19	0.53	2.96	2.49	2.97	0.000140831	3.24662	up
F02_cb3998_c1/f1p0/1453	0	5	4	22	18	27	0	0.34	0.28	1.44	1.26	1.56	0.0408254	2.99715	up
F02_cb4048_c38/f1p0/2479	0	0	0	833	379	419	0	0	0	30.02	14.84	13.2	2.26729e-19	Inf	up
F02_cb4055_c15/f1p0/2620	15	14	0	68	57	35	0.46	0.43	0	2.3	2.09	1.03	0.0267617	2.76306	up
F02_cb4078_c0/f1p0/2981	0	0	0	50	116	129	0	0	0	1.43	3.55	3.18	5.25963e-08	Inf	up
F02_cb4095_c19/f1p0/2736	14	4	1	94	53	102	0.4	0.12	0.04	2.97	1.83	2.83	3.81414e-05	3.87635	up
F02_cb4095_c24/f1p0/2665	20	14	8	417	259	370	0.57	0.4	0.29	13.19	8.9	10.22	3.3388e-11	4.78744	up
F02_cb4095_c3/f3p2/2610	0	0	0	270	168	227	0	0	0	8.82	5.95	6.48	4.41622e-20	Inf	up
F02_cb420_c1/f1p0/4442	3	5	12	42	40	75	0.05	0.09	0.26	0.77	0.8	1.2	0.0038711	2.96541	up
F02_cb420_c3/f1p0/2581	4	1	7	16	25	46	0.14	0.03	0.27	0.54	0.92	1.34	0.0234617	2.84615	up
F02_cb4270_c3/f1p0/2063	7	10	5	54	39	49	0.28	0.4	0.28	2.32	1.81	1.85	0.0140309	2.85819	up
F02_cb42_c16/f1p2/2940	2	1	0	858	2808	2301	0.05	0.03	0	24.52	87.17	57.43	4.21942e-08	11.2794	up
F02_cb42_c30/f1p1/4628	0	0	0	2014	564	11682	0	0	0	35.21	10.74	178.15	0.0125171	Inf	up
F02_cb42_c35/f1p1/3953	3	5	0	6617	3665	17762	0.06	0.11	0	139.99	84.31	327.98	8.9132e-07	11.9926	up
F02_cb42_c48/f1p0/1082	0	0	0	3381	522	4450	0	0.01	0	320.85	53.44	370.71	9.00241e-09	Inf	up
F02_cb430_c3/f1p0/6512	0	0	0	1313	165	747	0	0	0	16.47	2.25	8.17	2.68229e-06	Inf	up
F02_cb4496_c2/f1p0/2308	0	0	0	20	29	30	0	0	0	0.81	1.26	1.03	2.83701e-06	Inf	up
F02_cb4518_c1/f4p2/535	0	5	1	467	538	1755	0	1.39	0.31	139.25	169.02	466.39	2.75848e-05	9.06284	up
F02_cb4529_c5/f1p0/1647	0	2	0	67	89	102	0	0.14	0	3.74	5.39	5	2.84029e-10	7.39906	up
F02_cb453_c0/f1p0/4402	23	25	11	367	286	456	0.38	0.41	0.24	6.88	5.84	7.45	7.48843e-10	4.40238	up
F02_cb453_c4/f1p0/4815	0	0	10	401	185	381	0	0	0.2	7.12	3.57	5.91	6.85154e-17	6.39698	up
F02_cb4681_c5/f1p0/2583	9	0	0	46	35	44	0.27	0	0	1.58	1.33	1.32	0.000364887	3.97612	up
F02_cb480_c4/f4p0/3916	17	17	0	403	232	372	0.31	0.33	0	8.42	5.28	6.79	5.09998e-12	5.13222	up
F02_cb4838_c10/f1p0/1772	0	7	3	294	78	111	0	0.36	0.19	15.73	4.54	5.22	0.00210098	5.72369	up
F02_cb4969_c3/f1p0/1414	23	46	20	173	143	188	1.4	2.82	1.5	11.9	10.62	11.33	0.000881775	2.68475	up
F02_cb5020_c13/f1p0/2749	126	105	75	486	317	457	3.52	2.94	2.6	15.36	10.89	12.61	0.00847053	2.17389	up
F02_cb5020_c30/f1p1/2530	0	0	4	18	17	55	0	0	0.18	0.62	0.63	1.63	0.0271641	4.29048	up
F02_cb5033_c3/f1p0/2601	5	0	2	37	33	48	0.15	0	0.07	1.24	1.18	1.38	0.000185134	4.15026	up
F02_cb5064_c4/f1p0/2458	0	0	0	38	35	18	0	0	0	1.36	1.34	0.57	7.61382e-07	Inf	up
F02_cb5090_c3/f1p0/6847	0	14	5	84	26	71	0	0.15	0.07	0.97	0.33	0.71	0.000912009	3.39222	up
F02_cb5141_c4/f2p1/2269	0	0	0	116	239	87	0	0	0	4.45	9.93	2.91	0.000254142	Inf	up
F02_cb5298_c5/f1p0/1190	4	2	1	32	20	36	0.29	0.15	0.09	2.67	1.8	2.64	0.00215136	3.80134	up
F02_cb5375_c39/f1p1/2063	373	173	144	20	5	0	14.17	6.66	6.82	0.88	0.27	0	0.000314006	-4.67717	down
F02_cb5383_c0/f2p0/719	0	0	0	32	44	40	0	0.03	0	5.64	8.23	6.24	6.8035e-08	Inf	up
F02_cb5434_c2/f1p0/3352	39	48	38	220	132	266	0.84	1.04	1.02	5.39	3.51	5.69	0.00178368	2.40454	up
F02_cb5434_c3/f1p0/1996	13	30	12	113	80	126	0.52	1.16	0.61	4.92	3.79	4.8	0.00324266	2.7113	up
F02_cb5440_c3/f1p1/2683	0	0	6	16	14	26	0	0	0.22	0.51	0.49	0.74	0.0296517	3.05065	up
F02_cb5450_c15/f1p2/2206	0	0	0	182	108	161	0	0	0	7.2	4.63	5.58	1.70797e-16	Inf	up
F02_cb5450_c2/f9p1/2057	13	11	6	168	77	194	0.49	0.44	0.32	7.22	3.6	7.28	4.71723e-07	3.98784	up
F02_cb5562_c12/f1p1/2240	30	45	45	0	0	0	1.03	1.55	1.91	0	0	0	2.40036e-07	#NAME?	down
F02_cb5641_c18/f11p3/1791	0	96	0	191	183	297	0	4.34	0	9.64	10	13.09	6.06762e-05	3.16	up
F02_cb5695_c39/f1p0/2898	0	0	7	316	154	285	0	0	0.27	9.88	5.26	7.8	2.22026e-16	6.56058	up
F02_cb5723_c24/f1p0/3666	4	0	4	38	25	33	0.08	0	0.1	0.87	0.63	0.67	0.00189031	3.57781	up
F02_cb5754_c32/f1p0/4450	53	92	101	373	182	391	0.87	1.49	2.04	6.81	3.62	6.22	0.0128801	1.99208	up
F02_cb5852_c0/f1p0/2626	0	0	0	69	41	80	0	0	0	2.26	1.46	2.28	3.75778e-10	Inf	up
F02_cb5852_c1/f1p0/2103	0	0	0	42	52	52	0	0	0	1.76	2.38	1.9	6.01283e-09	Inf	up
F02_cb5883_c2/f1p0/1760	0	1	0	556	894	454	0	0.05	0	28.57	49.78	20.41	2.57583e-09	11.3385	up
F02_cb5883_c4/f1p0/2293	0	0	0	1116	595	775	0	0	0	42.13	24.41	25.57	1.03196e-24	Inf	up
F02_cb5883_c5/f1p0/1463	0	0	0	548	296	560	0	0	0	35.26	20.62	31.52	2.17513e-24	Inf	up
F02_cb5943_c4/f1p0/2256	12	4	8	49	38	43	0.41	0.14	0.38	1.89	1.62	1.48	0.0411626	2.52797	up
F02_cb599_c8/f1p1/2508	0	0	0	88	55	64	0	0	0	3.02	2.06	1.92	1.33751e-10	Inf	up
F02_cb6030_c2/f3p1/2525	270	185	161	42	14	48	8.07	5.58	5.99	1.43	0.54	1.43	0.00240327	-2.50296	down
F02_cb6183_c13/f1p0/1342	35	41	34	184	148	247	2.22	2.65	2.71	13.22	11.48	15.52	0.00116786	2.51071	up
F02_cb6255_c8/f1p0/1936	0	0	0	61	135	113	0	0	0	2.8	6.73	4.54	1.28884e-07	Inf	up
F02_cb629_c45/f1p0/2864	13	6	10	62	57	68	0.34	0.16	0.32	1.82	1.82	1.75	0.00811737	2.78713	up
F02_cb6307_c12/f1p0/2217	0	0	5	51	32	42	0	0	0.23	2.03	1.38	1.46	2.58672e-05	4.4759	up
F02_cb6349_c1/f1p0/2548	0	3	2	15	49	64	0	0.09	0.07	0.5	1.78	1.87	0.00938441	4.85299	up
F02_cb6389_c10/f1p0/1470	49	42	24	398	213	251	2.76	2.43	1.72	25.44	14.76	14.04	2.12834e-05	3.05385	up
F02_cb6389_c9/f1p0/1647	38	29	24	284	280	232	1.88	1.46	1.5	15.84	16.88	11.32	4.74346e-06	3.29595	up
F02_cb6408_c9/f1p0/2280	17	23	21	78	132	152	0.6	0.8	0.9	3	5.48	5.05	0.00164732	2.72097	up
F02_cb6437_c11/f1p1/1150	0	0	0	84	217	294	0	0	0	7.4	20.47	22.6	3.38968e-08	Inf	up
F02_cb6437_c2/f2p3/2411	2	0	0	156	776	582	0.06	0	0	5.57	30.08	18.16	0.000147601	9.84652	up
F02_cb6437_c4/f1p0/3703	0	2	0	68	389	167	0	0.04	0	1.52	9.4	3.25	0.0388573	8.79353	up
F02_cb6437_c5/f1p0/2162	1	0	0	195	1111	697	0.04	0	0	7.91	48.68	24.64	0.000321113	11.2684	up
F02_cb6581_c9/f1p0/4007	4	1	3	171	114	149	0.07	0.02	0.07	3.47	2.52	2.64	1.8775e-11	5.81728	up
F02_cb6644_c2/f1p0/1958	0	10	0	78	42	82	0	0.44	0	3.56	2.08	3.28	7.67354e-06	4.66143	up
F02_cb6659_c13/f1p0/1492	22	9	1	125	140	116	1.21	0.5	0.07	7.88	9.52	6.39	5.1746e-06	3.82942	up
F02_cb6659_c14/f1p0/2765	74	103	86	273	414	328	2.03	2.85	2.94	8.51	14.01	8.94	0.0176716	2.12866	up
F02_cb6659_c32/f1p0/1097	4	2	1	42	29	17	0.41	0.17	0.1	3.92	2.97	1.44	0.00210133	3.84971	up
F02_cb6673_c14/f1p0/1301	0	0	0	90	105	91	0	0	0	6.92	8.73	6.14	9.72452e-13	Inf	up
F02_cb6673_c3/f1p0/2629	0	0	0	187	101	231	0	0	0	6.05	3.54	6.52	9.59527e-18	Inf	up
F02_cb6673_c4/f1p0/1834	6	4	6	74	128	78	0.26	0.17	0.32	3.63	6.83	3.36	0.00165401	4.29152	up
F02_cb6678_c9/f1p0/1564	0	0	0	187	185	152	0	0	0	12.35	13.24	8.82	5.40593e-18	Inf	up
F02_cb679_c7/f1p0/3059	13	0	0	140	144	114	0.35	0	0	4.11	4.56	2.91	2.18481e-09	5.15379	up
F02_cb6819_c10/f1p0/1457	6	0	0	860	1410	1390	0.4	0	0	57.82	102.5	81.82	1.06114e-18	9.47994	up
F02_cb6828_c14/f1p0/1850	0	0	0	152	101	134	0	0	0	7.39	5.36	5.72	3.42329e-15	Inf	up
F02_cb6956_c10/f1p0/1731	1	0	1	31	15	23	0.05	0	0.06	1.64	0.89	1.08	0.000256393	5.08158	up
F02_cb6956_c25/f1p0/1140	0	0	0	29	23	29	0	0	0	2.6	2.21	2.28	2.3329e-06	Inf	up
F02_cb6956_c9/f1p0/1460	1	0	0	85	53	94	0.06	0	0	5.47	3.69	5.3	2.85034e-10	8.01411	up
F02_cb7188_c0/f2p0/2414	1	5	5	23	19	32	0.05	0.17	0.2	0.85	0.74	1	0.0475862	2.82568	up
F02_cb720_c15/f1p0/1855	119	44	61	320	224	304	5.08	1.89	3.23	15.47	11.77	12.85	0.0149631	2.02469	up
F02_cb720_c29/f1p0/1739	0	0	4	139	146	104	0	0	0.25	7.46	8.5	4.89	2.32471e-12	6.49002	up
F02_cb7294_c9/f1p0/1317	0	0	0	94	48	61	0	0	0	6.89	3.8	3.92	1.71069e-10	Inf	up
F02_cb7361_c2/f1p0/2227	0	0	0	14	17	21	0	0	0	0.58	0.76	0.75	0.000102082	Inf	up
F02_cb7361_c3/f1p0/2072	0	0	0	134	81	150	0	0	0	5.7	3.72	5.55	1.21864e-14	Inf	up
F02_cb7362_c14/f1p3/2167	6	11	4	54	49	77	0.25	0.45	0.21	2.35	2.34	2.93	0.00167008	3.29132	up
F02_cb7374_c18/f1p0/2457	1	2	1	123	117	145	0.04	0.07	0.04	4.31	4.47	4.43	3.36452e-12	6.76865	up
F02_cb7387_c12/f1p0/2338	115	58	154	408	497	484	3.81	1.93	6.32	15.27	20.18	15.81	0.00788481	2.16006	up
F02_cb7404_c3/f1p0/2062	6	15	3	123	98	98	0.23	0.59	0.14	5.31	4.6	3.72	7.2132e-06	3.98407	up
F02_cb7465_c4/f1p0/2217	0	6	75	214	195	223	0	0.21	3.24	8.37	8.31	7.65	2.29124e-05	2.85228	up
F02_cb7478_c12/f1p1/1709	42	78	50	182	163	241	2.01	3.74	2.91	9.69	9.42	11.23	0.0387355	1.93001	up
F02_cb7487_c11/f1p0/2073	0	12	30	98	112	78	0	0.48	1.41	4.17	5.16	2.89	0.00130459	2.79954	up
F02_cb7491_c10/f1p0/2254	0	0	0	55	31	37	0	0	0	2.12	1.31	1.26	3.90258e-08	Inf	up
F02_cb752_c27/f1p0/3189	31	0	4	94	31	72	0.77	0	0.15	2.61	0.95	1.74	0.0166352	2.57307	up
F02_cb7567_c7/f1p0/2407	1	1	0	25	21	32	0.04	0.04	0	0.91	0.82	1	9.245e-05	5.54681	up
F02_cb7647_c0/f2p0/2318	0	0	0	60	14	49	0	0	0	2.27	0.58	1.61	4.19444e-06	Inf	up
F02_cb7647_c6/f1p0/1811	0	40	0	140	34	109	0	1.8	0	6.95	1.84	4.75	0.0496278	3.10647	up
F02_cb7670_c3/f1p0/2299	2	1	18	110	41	71	0.07	0.03	0.74	4.16	1.67	2.36	0.000240336	3.25129	up
F02_cb7680_c19/f1p0/2299	49	32	57	0	0	6	1.83	1.23	2.67	0	0	0.25	0.000207266	-4.59611	down
F02_cb771_c8/f1p0/3940	13	25	14	114	82	134	0.24	0.47	0.32	2.39	1.88	2.46	0.00150315	2.80985	up
F02_cb7728_c19/f1p0/1487	0	0	0	117	62	160	0	0	0	7.38	4.29	8.84	6.0753e-14	Inf	up
F02_cb7730_c14/f1p4/1716	0	33	15	267	287	273	0	1.58	0.92	14.07	16.4	12.61	3.0011e-09	4.31418	up
F02_cb7788_c8/f1p0/970	184	152	180	1067	1276	741	17.74	15.02	21.4	116.89	150.52	71.41	0.00461745	2.73942	up
F02_cb7836_c6/f1p0/719	0	0	0	38	17	27	0	0	0	6.58	3.15	4.13	2.15428e-06	Inf	up
F02_cb7897_c31/f1p0/1965	0	0	0	112	36	41	0	0	0	5.05	1.75	1.64	2.55384e-05	Inf	up
F02_cb791_c8/f1p0/2264	1	12	6	57	68	51	0.03	0.42	0.26	2.21	2.84	1.71	0.00111442	3.42609	up
F02_cb7991_c5/f1p0/2029	0	0	4	38	18	41	0	0	0.2	1.66	0.85	1.57	0.000111709	4.39851	up
F02_cb7995_c9/f1p0/1958	0	0	0	84	18	52	0	0	0	3.82	0.89	2.05	2.29124e-05	Inf	up
F02_cb8049_c8/f2p0/2241	45	88	71	276	246	332	1.56	3.06	3.06	10.7	10.37	11.25	0.00623208	2.19069	up
F02_cb8083_c2/f1p0/2130	0	0	0	125	56	123	0	0	0	5.12	2.51	4.43	4.83159e-13	Inf	up
F02_cb8102_c5/f1p0/1819	0	1	0	51	37	51	0	0.04	0	2.56	1.98	2.24	8.81897e-08	7.47134	up
F02_cb8103_c7/f1p1/2159	0	0	4	43	19	24	0	0	0.18	1.76	0.87	0.88	0.000307259	4.24256	up
F02_cb811_c2/f1p0/1946	8	6	0	68	54	99	0.33	0.26	0	3.13	2.69	3.96	2.07541e-05	4.21753	up
F02_cb8230_c3/f1p1/2257	17	45	12	124	144	122	0.59	1.57	0.51	4.78	6.03	4.12	0.00328596	2.65966	up
F02_cb8230_c5/f1p1/2218	30	78	64	279	159	229	1.06	2.73	2.76	10.96	6.81	7.85	0.0134463	2.05268	up
F02_cb8232_c2/f1p0/1400	0	0	0	23	15	22	0	0	0	1.56	1.1	1.31	3.31106e-05	Inf	up
F02_cb8363_c9/f1p0/2020	0	0	0	57	66	42	0	0	0	2.66	3.32	1.7	1.62936e-09	Inf	up
F02_cb8414_c11/f4p3/1806	0	0	6	17	20	30	0	0	0.35	0.89	1.13	1.31	0.00880315	3.3317	up
F02_cb8414_c38/f1p0/1420	0	0	7	30	43	27	0	0	0.6	2.29	3.48	1.79	0.00109294	3.74687	up
F02_cb8478_c12/f1p0/2113	6	45	22	110	140	114	0.25	1.67	1.01	4.59	6.31	4.14	0.005992	2.53451	up
F02_cb850_c79/f1p0/2647	1	1	1	38	40	27	0.03	0.03	0.04	1.22	1.39	0.76	1.95627e-05	5.28658	up
F02_cb8570_c19/f1p0/1490	0	0	0	20	22	79	0	0	0	1.24	1.46	4.25	0.00515374	Inf	up
F02_cb8694_c25/f10p2/1868	123	94	54	0	35	0	5.21	4.02	2.85	0	1.85	0	0.0041251	-2.49183	down
F02_cb8704_c0/f7p0/2049	65	91	110	310	256	351	2.46	3.51	5.2	13.32	11.96	13.21	0.0332251	1.86872	up
F02_cb8758_c23/f1p0/1890	34	22	28	0	0	0	1.41	0.94	1.47	0	0	0	6.87174e-06	#NAME?	down
F02_cb875_c207/f1p0/543	21	18	26	102	95	211	5.42	4.99	7.99	29.6	29.09	54.54	0.000756525	2.70549	up
F02_cb885_c47/f1p0/2801	0	0	0	15	18	16	0	0	0	0.53	0.66	0.47	0.000157603	Inf	up
F02_cb885_c55/f1p3/2603	0	0	0	60	67	96	0	0	0	1.99	2.4	2.75	5.07143e-11	Inf	up
F02_cb885_c9/f4p1/2595	17	32	23	94	92	174	0.51	0.93	0.86	3.1	3.28	5	0.00631625	2.44393	up
F02_cb8864_c41/f1p0/2298	0	7	50	128	114	98	0	0.26	2.1	4.84	4.67	3.23	0.00190274	2.49918	up
F02_cb8864_c59/f1p0/2523	8	17	13	122	76	92	0.24	0.51	0.48	4.12	2.78	2.73	0.00067178	3.05046	up
F02_cb8865_c32/f1p0/1355	8	0	4	39	48	49	0.52	0	0.31	2.79	3.71	3.07	0.000756525	3.59416	up
F02_cb8926_c14/f1p0/1569	8	6	0	38	22	46	0.44	0.34	0	2.24	1.45	2.39	0.0119563	3.14057	up
F02_cb8926_c16/f1p0/1179	0	6	0	40	39	39	0	0.47	0	3.45	3.6	2.93	9.40261e-05	4.67954	up
F02_cb8926_c8/f1p0/2808	67	9	6	141	60	148	1.89	0.28	0.24	4.52	2.1	4.13	0.0223111	2.2097	up
F02_cb898_c23/f1p1/3711	0	0	13	53	20	64	0	0	0.33	1.17	0.5	1.25	0.00111641	3.17709	up
F02_cb9037_c3/f1p1/2054	0	0	0	61	63	81	0	0	0	2.63	2.96	3.06	1.44897e-10	Inf	up
F02_cb9061_c1/f1p0/2073	0	0	0	118	103	133	0	0	0	5.02	4.74	4.93	1.91858e-14	Inf	up
F02_cb906_c3/f1p0/2293	55	27	14	0	0	4	1.84	0.92	0.62	0	0	0.14	0.0409468	-4.55222	down
F02_cb907_c35/f1p0/1856	0	0	0	20	26	42	0	0	0	1.01	1.38	1.8	1.07223e-06	Inf	up
F02_cb907_c5/f1p0/4738	0	0	0	251	85	244	0	0	0	4.26	1.58	3.62	4.91698e-15	Inf	up
F02_cb911_c68/f7p3/3821	0	0	0	404	165	320	0	0	0	8.68	3.86	6	2.55792e-22	Inf	up
F02_cb9151_c9/f1p0/3005	0	5	7	36	34	50	0	0.15	0.25	1.03	1.07	1.27	0.00211009	3.35894	up
F02_cb9230_c0/f1p0/2113	2	1	4	22	20	23	0.07	0.04	0.18	0.91	0.91	0.85	0.0191757	3.22654	up
F02_cb9267_c8/f1p1/1435	10	2	4	30	32	42	0.61	0.15	0.32	2.01	2.33	2.43	0.0256691	2.82069	up
F02_cb9287_c7/f1p0/2043	59	67	38	1017	640	828	2.58	2.94	2.08	50.16	34.25	35.73	1.1261e-07	4.0723	up
F02_cb9310_c16/f1p1/2978	0	0	7	41	48	71	0	0	0.24	1.18	1.49	1.76	1.13815e-05	4.36585	up
F02_cb9316_c7/f1p0/1907	0	0	10	18	23	41	0	0	0.52	0.88	1.17	1.7	0.0159495	2.87758	up
F02_cb9341_c2/f1p0/2098	0	0	0	32	24	46	0	0	0	1.34	1.09	1.68	2.59068e-07	Inf	up
F02_cb9359_c9/f1p0/1129	0	0	0	28	42	38	0	0	0	2.57	4.13	3.04	1.36749e-07	Inf	up
F02_cb9501_c2/f2p0/620	17	7	1	182	274	251	3.33	1.6	0.29	40.66	64.83	49.54	1.58447e-09	5.08237	up
F02_cb9526_c1/f2p1/1312	156	99	40	266	425	419	10.16	6.58	3.26	19.64	33.88	27.09	0.0176757	2.14286	up
F02_cb9526_c2/f2p1/1304	6	0	10	59	88	83	0.44	0	0.82	4.43	7.1	5.43	2.71417e-05	3.85185	up
F02_cb9526_c3/f1p0/2073	5	5	3	48	69	60	0.21	0.19	0.17	2.03	3.21	2.24	0.000115269	3.97385	up
F02_cb9586_c5/f1p1/1200	0	0	1	57	53	79	0	0	0.1	4.77	4.79	5.78	3.24711e-09	7.40482	up
F02_cb9605_c0/f4p0/1918	0	0	0	74	51	88	0	0	0	3.43	2.61	3.6	9.6914e-11	Inf	up
F02_cb9613_c17/f1p0/1864	0	0	0	44	68	211	0	0	0	2.16	3.64	9.02	0.000641197	Inf	up
F02_cb9613_c28/f1p0/1854	0	0	0	220	247	217	0	0	0	12.64	15.37	10.9	2.21815e-20	Inf	up
F02_cb9698_c1/f1p0/2052	0	0	0	662	128	451	0	0	0	28.39	5.95	16.91	1.26469e-08	Inf	up
F02_cb9755_c0/f17p1/1812	0	0	1	714	714	522	0	0	0.05	35.42	38.39	22.65	5.96593e-24	10.8116	up
F02_cb9771_c17/f1p0/1984	9	0	11	70	53	38	0.38	0	0.55	3.13	2.61	1.51	0.00313098	3.01721	up
F02_cb9787_c4/f1p0/796	0	0	0	36	25	23	0	0	0	5.3	3.95	2.99	1.67164e-06	Inf	up
F02_cb9833_c0/f1p0/2026	0	0	0	15	14	21	0	0	0	0.66	0.7	0.82	0.000140143	Inf	up
F02_cb9845_c5/f1p0/1465	0	0	0	69	25	18	0	0	0	4.46	1.75	1.01	0.00107409	Inf	up
F02_cb9874_c43/f1p0/3019	0	0	0	80	24	73	0	0	0	2.2	0.72	1.75	3.08008e-09	Inf	up
F02_cb994_c16/f1p0/974	8	1	0	53	25	34	0.77	0.1	0	5.81	2.95	3.27	0.000947372	3.81073	up
F02_cb994_c8/f1p0/2496	1	0	1	223	45	233	0.03	0.01	0.04	7.57	1.66	6.91	3.06976e-06	7.88	up
F02_cb9964_c4/f3p0/1706	9	6	10	216	161	444	0.42	0.29	0.58	11.56	9.35	20.71	1.64483e-06	5.06973	up
F02_cb9988_c12/f1p0/1460	0	0	5	75	197	163	0	0	0.36	4.85	13.76	9.23	6.06395e-05	6.36245	up
F02_cb9988_c8/f1p0/1670	50	8	55	115	187	232	2.43	0.4	3.29	6.27	11.02	11.01	0.00576237	2.28833	up

## Sheet: T04_T05_T06_vs_T12_T13_T14.DEG_
#ID	T04_Count	T05_Count	T06_Count	T12_Count	T13_Count	T14_Count	T04_FPKM	T05_FPKM	T06_FPKM	T12_FPKM	T13_FPKM	T14_FPKM	FDR	log2FC	regulated
F01_cb1000_c0/f1p0/3978	38	31	43	3	3	4	0.53	0.46	0.74	0.08	0.07	0.07	0.0159789	-3.02289	down
F01_cb10022_c0/f1p0/2090	4	4	3	21	24	31	0.14	0.12	0.11	0.98	0.88	1.16	0.00635834	3.27124	up
F01_cb10058_c15/f6p2/1549	37	62	48	123	110	93	1.49	2.63	2.39	8.16	5.71	4.89	0.0143789	1.63682	up
F01_cb10084_c25/f1p0/1985	83	167	66	187	209	157	2.65	5.6	2.65	9.81	8.64	6.57	0.0428268	1.31651	up
F01_cb10109_c2/f1p0/1731	51	33	29	0	2	0	1.81	1.22	1.29	0	0.1	0	6.73065e-05	-5.21407	down
F01_cb10172_c18/f1p0/1498	66	52	40	166	152	193	2.78	2.31	2.11	11.5	8.2	10.56	1.1224e-05	2.1968	up
F01_cb10205_c5/f1p0/1933	284	178	119	3	0	0	8.74	5.76	4.57	0.15	0	0	3.79816e-15	-6.97536	down
F01_cb10212_c7/f1p0/1768	329	248	239	83	67	71	11.87	9.37	10.74	4.93	3.12	3.35	0.0159035	-1.37514	down
F01_cb10254_c3/f1p0/976	77	81	93	7	6	7	5.69	6.24	8.53	0.88	0.57	0.69	5.12889e-05	-3.17693	down
F01_cb10284_c7/f1p0/2028	39	27	19	6	0	0	1.19	0.87	0.74	0.31	0	0	0.0288787	-3.21073	down
F01_cb10307_c6/f1p0/1642	62	61	62	0	0	0	2.32	2.41	2.88	0	0	0	6.08879e-10	#NAME?	down
F01_cb10361_c4/f1p0/2018	1261	1054	919	261	298	303	41.25	36.11	37.35	14.05	12.58	12.97	0.0337293	-1.4071	down
F01_cb10534_c6/f1p1/1994	51	51	55	7	3	5	1.54	1.59	2.07	0.39	0.15	0.23	0.00380264	-2.9042	down
F01_cb10542_c11/f1p0/1831	328	307	340	0	0	0	10.78	10.57	13.89	0	0	0	1.89922e-35	#NAME?	down
F01_cb1054_c3/f3p0/2171	314	324	234	35	48	117	8.49	9.18	7.88	1.55	1.69	4.13	0.00171371	-1.69004	down
F01_cb10559_c5/f1p0/1820	0	0	0	56	63	89	0	0	0	3.08	2.73	3.86	3.7023e-16	Inf	up
F01_cb10567_c2/f1p0/1702	127	84	92	164	133	236	4.56	3.16	4.12	9.7	6.17	11.07	0.0353023	1.29253	up
F01_cb10587_c5/f1p0/1051	1172	3075	523	1	1	0	76.56	210.43	42.52	0.15	0.08	0	0.000374889	-10.6241	down
F01_cb1060_c3/f1p0/3364	39	14	11	41	102	99	0.66	0.25	0.25	1.12	2.2	2.16	0.015393	2.46098	up
F01_cb10614_c1/f1p1/1983	76	55	38	0	0	0	2.29	1.74	1.44	0	0	0	4.31728e-09	#NAME?	down
F01_cb10614_c4/f1p0/1746	43	47	37	0	4	10	1.49	1.7	1.59	0	0.2	0.47	0.0241047	-2.7911	down
F01_cb10632_c3/f1p1/1868	38	28	70	0	0	0	1.26	0.97	2.84	0	0	0	0.00039593	#NAME?	down
F01_cb10664_c5/f1p0/1314	139	136	132	50	9	36	7.05	7.19	8.29	4.26	0.59	2.4	0.0279355	-1.62055	down
F01_cb10683_c0/f2p0/1909	321	260	208	1	0	0	10.06	8.53	8.12	0.05	0	0	2.31238e-29	-9.02584	down
F01_cb10683_c3/f1p0/5275	217	256	318	1	0	1	2.24	2.76	4.07	0.02	0	0.02	9.04328e-19	-8.20575	down
F01_cb10699_c6/f1p0/1295	323	208	93	0	2	0	16.16	10.87	5.77	0	0.13	0	1.19649e-08	-7.64955	down
F01_cb1070_c8/f1p0/3686	62	41	25	12	0	0	0.95	0.66	0.48	0.31	0	0	0.0116804	-2.79213	down
F01_cb10715_c25/f1p0/1650	396	341	251	46	76	78	16.4	14.79	12.95	3.2	4.07	4.22	0.000199183	-1.80754	down
F01_cb10783_c11/f1p1/738	63	44	46	0	23	0	6.96	5.08	6.33	0	3.41	0	0.0481739	-2.14183	down
F01_cb10918_c7/f5p1/1956	135	79	80	11	4	4	4.12	2.52	3.04	0.6	0.17	0.17	2.77435e-06	-3.40009	down
F01_cb10921_c2/f1p0/1733	75	56	81	11	4	5	2.6	2.03	3.49	0.63	0.18	0.23	0.000596142	-2.90074	down
F01_cb10949_c0/f2p0/1919	38	100	44	80	122	162	1.18	3.26	1.73	4.09	4.91	6.6	0.0261343	1.45153	up
F01_cb10958_c4/f1p0/1211	74	72	89	0	0	20	4.06	4.12	6.04	0	0	1.47	0.000154955	-3.26665	down
F01_cb11041_c9/f1p1/1764	28	28	29	0	0	0	0.98	1.04	1.24	0	0	0	6.95874e-05	#NAME?	down
F01_cb11049_c4/f1p0/1910	237	122	63	0	0	0	8.41	4.55	2.79	0	0	0	3.74897e-07	#NAME?	down
F01_cb11075_c1/f1p0/1830	81	61	81	7	19	13	2.75	2.17	3.43	0.44	0.84	0.61	0.0309926	-2.02783	down
F01_cb11075_c5/f1p0/5767	172	161	176	1	0	0	1.61	1.58	2.05	0.02	0	0	3.55381e-21	-8.41874	down
F01_cb11127_c8/f1p0/800	24	3	18	57	30	58	2.27	0.32	2.19	9.42	3.75	7.25	0.0195044	2.18094	up
F01_cb11136_c0/f5p0/1838	54	163	124	13	0	0	1.79	5.59	5.04	0.71	0	0	0.00263444	-4.17321	down
F01_cb11173_c4/f4p0/1867	130	117	86	20	28	13	4.18	3.94	3.44	1.05	1.18	0.56	0.00858448	-1.90737	down
F01_cb11177_c3/f1p0/1904	107	214	101	460	331	276	3.51	7.31	4.09	24.56	13.88	11.71	0.0176292	1.84756	up
F01_cb11177_c5/f1p0/1264	0	27	0	26	59	60	0	1.48	0	2.31	3.96	4.09	0.00530741	2.88927	up
F01_cb11178_c4/f1p0/1880	70	121	92	10	5	14	2.26	4.06	3.64	0.55	0.22	0.62	0.000156305	-2.85237	down
F01_cb11188_c1/f2p0/1793	71	76	39	0	1	25	2.41	2.71	1.64	0	0.06	1.12	0.0186405	-2.50002	down
F01_cb11213_c33/f1p1/1748	546	288	272	51	42	72	18.94	10.47	11.73	2.93	1.89	3.27	6.23743e-05	-2.24289	down
F01_cb11350_c3/f1p0/1864	101	90	51	0	1	1	3.27	3.04	2.07	0	0.08	0.08	2.37379e-10	-6.44183	down
F01_cb11350_c7/f1p0/1586	382	241	265	32	45	84	15.99	10.57	13.79	2.26	2.45	4.6	5.00042e-05	-2.00469	down
F01_cb1137_c15/f1p0/1892	458	434	223	58	123	71	14.51	14.38	8.77	3.02	5.03	2.94	0.00487841	-1.60907	down
F01_cb11391_c55/f1p0/1254	31	42	22	0	0	0	1.63	2.29	1.44	0	0	0	2.01887e-05	#NAME?	down
F01_cb11431_c12/f1p0/1712	0	0	0	47	79	81	0	0	0	2.97	3.85	3.97	3.96904e-16	Inf	up
F01_cb11455_c7/f1p0/2557	62	59	23	0	0	0	1.43	1.43	0.66	0	0	0	6.96711e-08	#NAME?	down
F01_cb11551_c1/f2p0/2063	699	722	658	53	57	67	20.03	21.65	23.42	2.49	2.1	2.5	5.23807e-12	-3.07528	down
F01_cb11621_c5/f1p0/1609	36	45	39	2	4	5	1.38	1.83	1.88	0.19	0.22	0.28	0.0129293	-2.99676	down
F01_cb11692_c1/f1p0/1836	138	120	105	4	0	1	4.8	4.38	4.54	0.23	0	0.06	6.36039e-13	-5.64374	down
F01_cb11701_c0/f1p0/1835	51	55	61	6	0	10	1.68	1.91	2.51	0.37	0	0.43	0.00279273	-2.98556	down
F01_cb11712_c8/f1p0/1742	17	7	14	91	55	95	0.62	0.27	0.62	5.24	2.47	4.36	2.18089e-06	3.14994	up
F01_cb11712_c9/f1p0/1789	77	94	36	331	266	413	2.66	3.4	1.55	18.69	11.79	18.5	2.19515e-10	2.78702	up
F01_cb11773_c1/f1p0/1824	131	19	105	435	576	369	4.49	0.71	4.48	24.43	25.37	16.44	2.62059e-06	2.95884	up
F01_cb11857_c14/f1p2/1642	0	6	0	13	26	20	0	0.25	0	0.83	1.29	0.99	0.00705809	3.78199	up
F01_cb11861_c3/f2p0/1178	50	21	23	58	91	76	2.82	1.25	1.61	5.46	6.65	5.62	0.0305453	1.79439	up
F01_cb11891_c2/f1p1/1792	623	602	482	137	140	137	22.02	22.27	21.16	7.99	6.39	6.35	0.00254786	-1.54176	down
F01_cb11892_c43/f1p0/925	598	402	533	0	178	204	46.81	33	51.89	0	18.09	21.01	0.0463132	-1.56442	down
F01_cb11908_c1/f4p1/1730	125	142	132	9	0	9	4.41	5.24	5.77	0.55	0	0.41	1.44629e-09	-4.03048	down
F01_cb1204_c22/f1p0/1279	22	51	32	0	0	0	1.13	2.76	2.03	0	0	0	6.39169e-06	#NAME?	down
F01_cb12095_c1/f1p0/2552	63	54	79	10	10	11	1.44	1.29	2.23	0.4	0.29	0.33	0.0257429	-2.19196	down
F01_cb12163_c5/f1p0/1883	150	163	96	2	1	1	4.77	5.43	3.79	0.1	0.04	0.04	4.6774e-15	-6.14431	down
F01_cb12224_c401/f1p0/3094	24	22	24	0	0	0	0.45	0.44	0.55	0	0	0	0.000550804	#NAME?	down
F01_cb12259_c3/f1p0/1255	108	51	47	16	7	5	5.65	2.82	3.08	1.44	0.53	0.39	0.0096608	-2.30053	down
F01_cb12263_c0/f1p0/1748	11	45	32	177	181	299	0.38	1.63	1.39	10.15	8.11	13.57	3.50624e-13	3.31564	up
F01_cb12263_c1/f1p0/1873	17	36	0	204	84	257	0.54	1.23	0	10.73	3.48	10.74	0.000105702	3.86602	up
F01_cb12274_c38/f1p1/3068	313	273	307	11	2	24	5.77	5.26	7.03	0.34	0.06	0.59	1.2917e-16	-4.19054	down
F01_cb12274_c56/f1p0/2780	55	5	87	91	83	126	1.24	0.13	2.43	3.32	2.4	3.68	0.0414108	1.4586	up
F01_cb12446_c13/f5p3/1693	74	178	101	185	231	230	2.67	6.72	4.54	10.98	10.76	10.86	0.0176537	1.34033	up
F01_cb12459_c4/f5p0/1718	734	410	532	126	156	111	25.98	15.23	23.43	7.36	7.14	5.15	0.00151153	-1.57096	down
F01_cb12463_c6/f5p0/1716	187	74	82	15	17	16	6.66	2.76	3.64	0.89	0.79	0.77	0.0263508	-2.29741	down
F01_cb12478_c1/f2p0/1409	93	94	118	1	0	11	4.22	4.42	6.61	0.07	0	0.66	2.41112e-08	-4.35766	down
F01_cb12496_c0/f1p0/1708	0	0	0	13	26	30	0	0	0	0.81	1.19	1.39	1.95238e-06	Inf	up
F01_cb12529_c1/f1p0/1761	862	390	539	92	141	85	29.25	13.86	22.73	5.13	6.17	3.76	0.00141827	-1.95806	down
F01_cb12531_c16/f1p0/1929	148	97	109	21	21	28	4.6	3.15	4.22	1.07	0.85	1.14	0.0126776	-1.84996	down
F01_cb12531_c31/f20p0/2065	371	307	305	91	80	94	10.63	9.22	10.87	4.3	2.97	3.51	0.0114444	-1.398	down
F01_cb12595_c9/f1p0/1636	51	45	100	0	0	0	1.95	1.78	4.7	0	0	0	6.12985e-05	#NAME?	down
F01_cb12661_c2/f2p0/1535	15	40	0	57	63	40	0.63	1.73	0	3.83	3.33	2.16	0.0377155	2.09515	up
F01_cb12665_c1/f1p1/1685	385	293	289	46	123	58	13.96	11.13	13.03	2.77	5.76	2.76	0.00177387	-1.56611	down
F01_cb12665_c2/f1p1/1613	1307	863	785	176	380	148	49.9	34.51	37.25	11.12	18.75	7.41	0.00651333	-1.51986	down
F01_cb12685_c132/f1p0/3004	1372	534	730	0	0	0	27.66	11.27	18.3	0	0	0	6.77363e-18	#NAME?	down
F01_cb12685_c145/f1p4/3147	998	470	1173	50	27	94	17.85	8.8	26.04	1.45	0.63	2.2	0.0019377	-3.53062	down
F01_cb12685_c152/f1p0/2647	288	156	155	0	0	13	6.36	3.61	4.27	0	0	0.39	6.30107e-15	-5.18998	down
F01_cb12685_c25/f1p1/2265	320	249	241	101	0	95	8.26	6.73	7.72	4.27	0	3.21	0.00604853	-1.5837	down
F01_cb1270_c88/f1p0/713	65	29	69	218	152	129	7.32	3.47	9.77	42.73	22.32	19.3	0.00553855	2.11795	up
F01_cb12725_c2/f1p0/1597	76	80	65	19	10	9	2.91	3.21	3.09	1.21	0.49	0.48	0.0288787	-2.0186	down
F01_cb12729_c4/f1p0/1560	392	190	268	91	60	85	15.57	7.92	13.27	5.97	3.11	4.45	0.0204775	-1.34342	down
F01_cb12731_c2/f1p0/1931	33	64	62	0	0	5	1.04	2.1	2.42	0	0	0.21	2.77144e-05	-4.72268	down
F01_cb12731_c4/f1p0/1613	139	50	76	6	7	0	5.27	2	3.58	0.37	0.34	0	0.000177414	-3.73534	down
F01_cb12820_c5/f1p1/1537	76	86	67	0	10	30	3.1	3.66	3.41	0	0.55	1.58	0.0306485	-2.13863	down
F01_cb12905_c2/f1p0/1516	164	152	104	20	17	37	6.77	6.58	5.31	1.36	0.91	2.03	0.00195244	-2.03832	down
F01_cb13013_c2/f1p0/1402	56	40	77	10	7	10	2.6	1.97	4.44	0.77	0.42	0.61	0.0368432	-2.22171	down
F01_cb13044_c254/f1p2/1109	87	88	29	0	0	0	5.31	5.64	2.19	0	0	0	1.84477e-07	#NAME?	down
F01_cb13044_c306/f1p0/1248	322	56	320	1	0	0	16.86	3.11	20.8	0.09	0	0	0.000123349	-8.87191	down
F01_cb13044_c321/f1p0/1548	259	285	402	0	0	0	10.41	11.96	20.07	0	0	0	3.09818e-17	#NAME?	down
F01_cb13050_c10/f1p0/1283	156	117	91	0	0	0	7.86	6.16	5.74	0	0	0	6.85355e-17	#NAME?	down
F01_cb13050_c11/f1p0/642	24	30	54	0	0	0	3.34	4.31	9.24	0	0	0	0.000291817	#NAME?	down
F01_cb13050_c8/f2p0/471	152	125	187	0	0	0	37.25	32.4	57.57	0	0	0	6.27855e-19	#NAME?	down
F01_cb13050_c9/f1p0/1675	40	31	44	0	0	0	1.46	1.19	2.04	0	0	0	1.45611e-06	#NAME?	down
F01_cb13069_c21/f1p0/1236	8255	6405	8119	317	354	463	521.84	424.32	638.49	33.66	29.01	38.43	0.00441519	-3.85954	down
F01_cb13069_c59/f1p1/1061	117	42	50	839	2147	2227	7.57	2.9	4.01	90.99	179.29	188.49	1.51679e-07	5.15749	up
F01_cb13069_c60/f64p2/1135	26	40	50	0	3	2	1.57	2.53	3.72	0	0.3	0.19	0.000629688	-4.10049	down
F01_cb13075_c0/f1p0/1089	88	130	141	13	20	33	5.49	8.5	10.95	1.36	1.61	2.7	0.00545923	-2.02527	down
F01_cb13075_c2/f1p0/1267	138	89	157	24	32	32	7.12	4.82	10.05	2.05	2.12	2.15	0.028415	-1.65395	down
F01_cb13116_c16/f1p0/948	10691	7887	2895	875	465	283	875.42	677.15	295.16	122.12	49.44	30.54	0.0195496	-3.13488	down
F01_cb13116_c26/f1p1/657	168	88	16	0	0	0	21.99	12.08	2.7	0	0	0	0.0041315	#NAME?	down
F01_cb13116_c8/f1p0/959	56	22	89	0	0	0	4.18	1.74	8.29	0	0	0	0.00239357	#NAME?	down
F01_cb13132_c20/f1p0/1339	70	0	14	109	85	72	3.43	0	0.9	8.88	5.43	4.64	0.0126865	2.28335	up
F01_cb13141_c2/f1p0/1970	43	31	49	0	0	0	1.3	0.98	1.84	0	0	0	5.55541e-07	#NAME?	down
F01_cb13141_c7/f4p0/640	311	287	334	1	0	1	42.34	41.08	56.85	0.24	0	0.18	5.28955e-32	-8.4254	down
F01_cb13153_c6/f1p1/908	15	69	12	89	92	98	1.26	5.83	1.21	12.09	9.58	10.36	0.00200412	2.0262	up
F01_cb13169_c5/f1p1/807	172	211	160	0	0	0	16.3	20.91	18.89	0	0	0	1.45589e-23	#NAME?	down
F01_cb13216_c3/f2p0/1421	0	0	27	97	77	67	0	0	1.52	7.18	4.48	3.91	5.88685e-08	3.50387	up
F01_cb13216_c8/f1p0/1449	212	131	126	0	27	41	9.22	5.99	6.84	0	1.54	2.34	0.000130207	-2.34114	down
F01_cb13241_c2/f1p0/1604	21	0	0	25	62	41	0.85	0	0	1.61	3.16	2.11	0.0259287	3.2761	up
F01_cb13277_c0/f3p0/1465	175	198	190	46	51	56	7.52	8.88	10.12	3.29	2.83	3.18	0.0380819	-1.40517	down
F01_cb13288_c7/f1p0/1004	261	285	298	16	91	120	18.36	20.98	26.02	1.97	8.35	11.05	0.0154972	-1.46723	down
F01_cb13299_c33/f1p0/1343	157	230	128	38	55	18	7.53	11.51	7.64	3.03	3.45	1.15	0.0152116	-1.67253	down
F01_cb13299_c35/f1p0/1306	303	381	398	104	26	20	14.96	19.74	24.47	8.55	1.67	1.31	4.96993e-05	-2.32516	down
F01_cb13299_c39/f1p1/1487	654	365	681	40	51	88	27.52	16.1	35.64	2.85	2.8	4.85	7.70373e-05	-2.80495	down
F01_cb13299_c42/f1p0/1198	732	308	451	129	133	78	40.03	17.67	30.66	11.8	9.46	5.6	0.0374133	-1.58568	down
F01_cb13299_c44/f1p0/901	29	42	36	7	0	3	2.39	3.56	3.68	1.06	0	0.33	0.0232807	-2.93377	down
F01_cb13299_c72/f1p0/1227	1140	1126	637	285	250	185	62.61	64.77	43.48	26.13	17.76	13.32	0.0106101	-1.47473	down
F01_cb13299_c78/f1p0/1500	455	456	217	84	84	64	21.43	22.52	12.72	6.62	5.15	3.95	0.0018797	-1.74345	down
F01_cb13436_c7/f1p0/1250	255	366	361	57	68	146	13.42	20.15	23.59	5	4.62	10.09	0.0405268	-1.44343	down
F01_cb13543_c5/f1p0/1049	91	79	81	2	5	2	5.96	5.44	6.66	0.28	0.47	0.18	1.61681e-07	-4.27818	down
F01_cb13594_c1/f1p1/1272	559	536	366	52	40	0	28.63	28.77	23.34	4.48	2.65	0	4.7713e-15	-3.39344	down
F01_cb13649_c2/f2p0/1118	155	163	138	49	11	0	9.35	10.33	10.36	5	0.88	0	3.86806e-05	-2.34595	down
F01_cb1366_c10/f1p1/3459	508	408	290	96	66	159	8.21	6.89	5.81	2.53	1.37	3.34	0.00900993	-1.43533	down
F01_cb1366_c11/f1p1/3396	99	95	82	17	23	0	1.64	1.66	1.69	0.48	0.49	0	0.00307197	-2.20274	down
F01_cb13690_c2/f1p0/846	0	0	0	19	48	20	0	0	0	2.83	5.46	2.29	0.000529917	Inf	up
F01_cb13704_c1/f1p0/897	165	102	149	6	6	7	13.44	8.69	15.08	0.95	0.66	0.85	9.00339e-10	-3.96761	down
F01_cb13704_c4/f1p0/1508	28	25	35	0	0	3	1.19	1.1	1.79	0	0	0.19	0.00259795	-4.58906	down
F01_cb13735_c6/f1p0/903	301	370	305	68	110	110	24.16	31.11	30.43	9.31	11.53	11.61	0.0338716	-1.28703	down
F01_cb13837_c0/f5p0/814	214	174	185	0	0	0	19.96	17.02	21.49	0	0	0	1.76727e-24	#NAME?	down
F01_cb13853_c0/f1p0/611	6	3	8	19	25	34	0.88	0.46	1.47	5.21	4.97	6.86	0.0335746	2.63899	up
F01_cb13853_c1/f1p0/3181	5	21	7	43	41	52	0.09	0.4	0.16	1.25	0.93	1.21	0.00496975	2.50679	up
F01_cb13866_c6/f3p0/1596	230	200	214	0	14	68	8.9	8.12	10.28	0	0.72	3.45	1.70206e-06	-2.61995	down
F01_cb13944_c2/f1p0/1570	90	34	48	11	6	8	3.55	1.4	2.37	0.75	0.34	0.45	0.029377	-2.24966	down
F01_cb13992_c0/f1p0/1312	7	25	5	87	116	92	0.35	1.29	0.31	7.1	7.4	5.91	1.3982e-08	3.49652	up
F01_cb14162_c1/f1p0/2201	101	58	67	2	6	20	2.68	1.61	2.21	0.09	0.21	0.69	0.00332175	-2.6049	down
F01_cb14234_c1/f1p0/1821	270	221	122	21	72	56	8.93	7.65	5.01	1.14	3.07	2.42	0.0237276	-1.52383	down
F01_cb14257_c26/f1p0/1393	254	152	194	10	0	19	11.61	7.26	11	0.76	0	1.13	3.89736e-12	-3.95439	down
F01_cb14303_c1/f1p0/1121	181	202	117	8	10	11	10.89	12.72	8.79	0.8	0.78	0.86	8.36271e-10	-3.61125	down
F01_cb14461_c2/f1p0/463	39	34	31	0	0	0	10.08	9.22	10.03	0	0	0	6.30034e-06	#NAME?	down
F01_cb14502_c1/f1p0/2708	29	27	9	40	84	96	0.62	0.6	0.24	1.37	2.28	2.64	0.00303708	2.27069	up
F01_cb14507_c0/f1p0/1506	98	62	74	3	7	18	4.06	2.7	3.82	0.25	0.43	0.98	0.00208085	-2.64289	down
F01_cb14586_c2/f1p0/884	65	38	57	0	1	0	5.39	3.31	5.89	0	0.21	0	8.19914e-08	-6.74005	down
F01_cb14634_c0/f1p0/1507	37	26	29	0	0	1	1.56	1.14	1.5	0	0	0.05	0.000187195	-6.21048	down
F01_cb1464_c8/f1p0/3596	23	28	48	5	0	0	0.37	0.47	0.96	0.15	0	0	0.0150487	-3.77461	down
F01_cb14790_c0/f1p0/895	39	46	32	2	0	1	3.18	3.93	3.27	0.28	0.09	0.11	0.000120433	-4.78769	down
F01_cb14895_c102/f1p1/638	1089	603	518	254	170	155	147.93	86.07	87.75	61.3	30.29	28.01	0.0280828	-1.38365	down
F01_cb14906_c4/f2p0/1023	158	364	262	6	0	0	11.51	27.82	23.74	0.85	0	0	9.95343e-09	-6.47791	down
F01_cb14968_c6/f2p2/840	513	539	278	47	137	76	45.79	50.45	30.84	7.17	15.85	8.92	0.00125395	-1.82702	down
F01_cb1497_c22/f1p0/3457	94	70	44	0	0	0	1.55	1.21	0.9	0	0	0	8.57652e-11	#NAME?	down
F01_cb15065_c1/f2p0/1204	328	297	275	143	73	51	17.99	17.04	18.74	13.1	5.21	3.69	0.0380819	-1.21817	down
F01_cb15069_c105/f1p0/561	4102	2411	3869	2	6	1	774.78	479.21	913.45	0.75	1.62	0.3	8.11573e-29	-9.62249	down
F01_cb15069_c123/f1p0/678	7467	5552	8349	0	0	0	1242.49	971.31	1734.99	0	0	0	5.68877e-20	#NAME?	down
F01_cb15069_c69/f1p0/626	2577	1508	2711	31	111	75	348.97	214.52	457.9	7.61	19.77	13.5	2.14063e-10	-4.48769	down
F01_cb15080_c9/f6p0/1312	907	584	587	174	154	161	44.52	30.07	35.84	14.25	9.79	10.36	0.00225562	-1.57261	down
F01_cb15172_c1/f9p0/1454	23	66	0	80	147	141	1	3.03	0	5.75	8.24	8	0.000345036	2.56456	up
F01_cb15269_c11/f1p0/467	64	58	41	1	6	0	16.04	15.48	13.13	0.5	2.01	0	4.6204e-05	-3.9444	down
F01_cb15283_c36/f1p1/710	159	248	42	0	0	0	18.77	30.72	6.17	0	0	0	0.000212474	#NAME?	down
F01_cb15380_c6/f3p0/862	183	153	182	22	54	24	15.73	13.85	19.45	3.35	6.09	2.8	0.00139849	-1.86041	down
F01_cb15430_c32/f1p1/1505	3975	2262	2106	0	2	0	176.61	105.28	116.36	0	0.16	0	4.25877e-37	-11.4152	down
F01_cb15511_c11/f2p0/1172	64	49	69	0	0	0	3.62	2.93	4.93	0	0	0	8.06407e-10	#NAME?	down
F01_cb15511_c5/f1p0/1092	50	100	60	0	0	0	3.23	6.73	4.8	0	0	0	4.52613e-09	#NAME?	down
F01_cb15518_c0/f3p0/583	240	166	167	19	18	0	38.49	28.09	33.6	5.5	3.8	0	4.04965e-10	-3.35783	down
F01_cb15545_c23/f1p8/1416	3857	2459	2048	0	0	6	179.75	120.02	118.67	0	0	0.37	2.89617e-34	-10.1101	down
F01_cb1557_c9/f1p1/1945	430	581	203	26	29	23	13.18	18.65	7.75	1.34	1.15	0.95	0.000767669	-3.43133	down
F01_cb155_c15/f1p0/3165	0	0	14	34	17	25	0	0	0.31	1	0.39	0.58	0.0173809	2.77302	up
F01_cb15634_c0/f9p1/736	48	51	21	0	0	0	5.29	5.83	2.91	0	0	0	1.03737e-06	#NAME?	down
F01_cb15634_c18/f1p0/940	905	738	618	2	0	0	80.09	68.54	68.17	0.3	0	0	1.26057e-44	-9.54745	down
F01_cb15640_c15/f3p0/771	763	284	392	2133	2500	4202	77.26	30.17	49.49	372.76	328.87	561.45	0.00021245	3.11127	up
F01_cb15683_c1/f1p1/1490	60	40	24	8	0	4	2.53	1.79	1.28	0.59	0	0.22	0.0162109	-2.83227	down
F01_cb15711_c0/f1p0/804	128	61	43	12	12	6	12.17	6.14	5.09	1.96	1.54	0.75	0.0438192	-2.36606	down
F01_cb15736_c48/f10p1/1183	1903	3661	1934	22	23	128	106.48	214.62	134.62	2.11	1.69	9.39	1.58116e-07	-5.06352	down
F01_cb15746_c17/f1p0/1294	27	28	2	52	70	97	1.32	1.46	0.14	4.21	4.39	6.18	0.00064986	2.47437	up
F01_cb15758_c1/f1p0/1441	59	83	41	94	98	161	2.58	3.83	2.24	6.84	5.55	9.21	0.0406181	1.41854	up
F01_cb1575_c32/f1p0/1099	173	136	179	0	6	0	10.71	8.83	13.73	0	0.56	0	1.11186e-16	-5.77438	down
F01_cb15895_c1/f1p0/855	28	28	16	61	81	60	2.47	2.64	1.77	9.25	9.28	6.99	0.0138169	2.01331	up
F01_cb16024_c11/f1p0/966	1570	1396	1491	196	482	410	118.06	110.05	139.63	25.04	47.01	40.54	0.0331464	-1.55549	down
F01_cb16298_c0/f1p0/1027	65	80	66	4	2	3	4.37	5.68	5.56	0.45	0.17	0.26	3.28731e-06	-4.06436	down
F01_cb16303_c0/f11p0/437	51	79	36	82	113	145	14.87	24.4	13.5	48.51	44.17	57.59	0.0262171	1.51167	up
F01_cb16338_c3/f1p0/513	1303	1535	754	183	386	225	266.61	330.62	193.14	70.21	103.95	62.08	0.00782373	-1.65146	down
F01_cb16344_c0/f1p1/1251	99	122	57	0	0	0	5.19	6.66	3.73	0	0	0	1.1853e-13	#NAME?	down
F01_cb16344_c1/f1p0/1115	192	161	255	7	14	1	11.61	10.22	19.16	0.81	1.12	0.13	9.31511e-09	-4.24331	down
F01_cb16357_c0/f6p0/870	250	264	179	61	38	51	21.19	23.49	18.9	8.88	4.26	5.72	0.00149341	-1.70498	down
F01_cb16428_c17/f1p0/955	1080	788	676	100	274	212	80.27	61.42	62.6	12.69	26.49	20.78	0.00265076	-1.61151	down
F01_cb16428_c29/f15p0/927	185	231	111	0	25	21	14.4	18.84	10.73	0	2.54	2.17	8.07964e-06	-3.04059	down
F01_cb16428_c5/f2p0/779	2494	1903	1697	18	57	16	272.06	217.82	230.78	3.5	8.14	2.34	1.51971e-21	-5.51467	down
F01_cb16438_c10213/f1p0/2213	45	60	29	1	0	0	1.19	1.67	0.96	0.04	0	0	1.41703e-06	-6.47238	down
F01_cb16438_c10442/f1p1/2786	122	291	147	0	0	0	2.88	7.15	4.29	0	0	0	2.00554e-08	#NAME?	down
F01_cb16438_c10540/f2p2/4009	77	139	118	17	2	2	1.07	2.01	2.03	0.38	0.04	0.04	1.13436e-05	-3.46197	down
F01_cb16438_c10787/f1p1/2890	88	129	70	0	0	0	1.74	2.66	1.73	0	0	0	4.52724e-14	#NAME?	down
F01_cb16438_c10960/f1p2/2696	4899	5926	6279	11	0	1	103.78	131.36	165.21	0.38	0	0.03	4.32948e-19	-9.93748	down
F01_cb16438_c10968/f2p0/2527	413	327	309	8	7	5	9.41	7.81	8.75	0.3	0.23	0.16	7.47334e-24	-5.18661	down
F01_cb16438_c11114/f1p0/2160	356	34	143	1	1	0	10.22	1.03	5.1	0.06	0.04	0	0.0158396	-7.41564	down
F01_cb16438_c11491/f3p0/3485	314	172	168	28	18	101	5.03	2.88	3.34	0.73	0.37	2.12	0.0421887	-1.72536	down
F01_cb16438_c11689/f1p0/3146	5147	4751	4262	648	478	620	106.45	102.84	109.47	21.84	12.74	16.72	0.023113	-2.52741	down
F01_cb16438_c11767/f1p2/3778	85	61	45	10	0	0	1.33	1	0.88	0.27	0	0	3.50467e-05	-3.64621	down
F01_cb16438_c12239/f1p0/3628	198	177	100	0	0	0	3.12	2.93	1.97	0	0	0	5.69542e-21	#NAME?	down
F01_cb16438_c12321/f1p0/1847	66	48	19	0	0	0	2.16	1.66	0.8	0	0	0	2.33262e-06	#NAME?	down
F01_cb16438_c12371/f1p5/2083	120	66	44	0	0	0	3.41	1.96	1.55	0	0	0	2.03249e-09	#NAME?	down
F01_cb16438_c12938/f1p0/2553	225	220	246	0	0	0	5.05	5.17	6.87	0	0	0	3.16091e-28	#NAME?	down
F01_cb16438_c13243/f1p0/1681	323	296	265	0	0	0	11.73	11.27	11.96	0	0	0	2.49646e-33	#NAME?	down
F01_cb16438_c13245/f1p0/2148	216	206	226	0	1	0	5.93	5.91	7.69	0	0.04	0	1.37815e-25	-8.76907	down
F01_cb16438_c13313/f1p3/3902	269	204	209	37	96	0	3.96	3.15	3.84	0.9	1.83	0	0.0025802	-1.77006	down
F01_cb16438_c13387/f1p0/3648	162	85	118	0	0	0	2.52	1.38	2.29	0	0	0	5.49189e-17	#NAME?	down
F01_cb16438_c13405/f1p0/1648	3989	12810	4166	13	2	0	148.36	498.81	192.57	0.82	0.11	0	8.3159e-06	-9.87699	down
F01_cb16438_c13539/f1p0/2653	319	150	249	49	68	81	7.2	3.54	6.99	1.8	1.98	2.38	0.0405726	-1.37457	down
F01_cb16438_c13751/f1p0/2927	699	42	664	0	0	0	13.54	0.85	15.97	0	0	0	0.000216093	#NAME?	down
F01_cb16438_c1389/f1p0/1838	152	193	300	0	0	0	5.08	6.77	12.49	0	0	0	6.21464e-10	#NAME?	down
F01_cb16438_c14086/f1p0/1790	935	771	726	0	271	336	31.57	27.23	30.47	0	11.82	14.8	0.00738465	-1.56033	down
F01_cb16438_c14726/f1p2/2506	301	213	58	0	0	0	6.95	5.16	1.69	0	0	0	1.30938e-06	#NAME?	down
F01_cb16438_c14898/f1p0/2931	286	310	310	0	0	0	6.08	6.89	8.17	0	0	0	5.45669e-34	#NAME?	down
F01_cb16438_c15491/f1p0/3209	62	72	57	15	10	2	1.1	1.33	1.25	0.44	0.23	0.05	0.0145517	-2.26324	down
F01_cb16438_c15771/f1p0/2554	58	60	66	0	0	1	1.32	1.43	1.84	0	0	0.03	6.34662e-09	-7.23231	down
F01_cb16438_c15892/f1p3/3665	206	318	196	0	0	0	3.19	5.15	3.77	0	0	0	1.82996e-21	#NAME?	down
F01_cb16438_c15900/f1p0/3685	31	58	44	2	1	0	0.47	0.91	0.84	0.05	0.02	0	1.94821e-05	-4.91294	down
F01_cb16438_c16327/f1p0/2469	274	48	258	0	0	0	6.5	1.19	7.64	0	0	0	3.56269e-05	#NAME?	down
F01_cb16438_c16446/f1p0/1637	388	926	534	14	31	0	14.88	37.14	25.41	0.92	1.55	0	1.59721e-05	-4.79986	down
F01_cb16438_c1660/f3p0/2130	195	197	261	54	81	0	5.39	5.72	8.96	2.44	2.92	0	0.0445148	-1.71714	down
F01_cb16438_c16714/f1p0/1868	204	276	240	39	45	40	6.79	9.61	9.92	2.15	1.96	1.73	4.82236e-05	-2.0556	down
F01_cb16438_c1682/f1p0/1949	58	38	34	0	0	14	1.79	1.23	1.31	0	0	0.57	0.0216102	-2.88547	down
F01_cb16438_c16886/f1p0/3061	31	0	47	83	65	95	0.62	0	1.14	2.62	1.64	2.42	0.00225562	2.07884	up
F01_cb16438_c17187/f5p20/4317	11024	9	7345	16	0	0	140.1	0.13	115.91	0.34	0	0	0.0011206	-9.55713	down
F01_cb16438_c17520/f1p0/3413	142	178	146	22	16	56	2.35	3.09	3	0.6	0.36	1.23	0.00420736	-1.89503	down
F01_cb16438_c17889/f1p1/2213	40	64	74	0	17	0	1.07	1.79	2.45	0	0.6	0	0.0114241	-2.84642	down
F01_cb16438_c17900/f4p4/4387	83	46	37	0	0	0	1.05	0.61	0.58	0	0	0	6.32719e-09	#NAME?	down
F01_cb16438_c1825/f1p0/2061	204	230	179	21	35	15	5.77	6.82	6.29	0.99	1.28	0.57	5.88262e-07	-2.58366	down
F01_cb16438_c18542/f1p2/2879	61	72	123	0	0	0	1.2	1.5	3.03	0	0	0	8.85414e-07	#NAME?	down
F01_cb16438_c18758/f4p0/2059	159	136	70	22	8	22	4.58	4.11	2.51	1.06	0.3	0.85	0.000620125	-2.30667	down
F01_cb16438_c1892/f1p0/3960	150	188	92	29	31	16	2.22	2.91	1.68	0.69	0.6	0.32	0.0016113	-1.95804	down
F01_cb16438_c18978/f1p2/3584	38	43	26	0	0	0	0.6	0.7	0.51	0	0	0	4.4689e-06	#NAME?	down
F01_cb16438_c1903/f1p0/3295	78	104	60	11	12	19	1.41	1.95	1.34	0.32	0.29	0.45	0.0231366	-2.05879	down
F01_cb16438_c1918/f1p0/2280	38	34	42	0	0	0	1.02	0.95	1.39	0	0	0	1.64051e-06	#NAME?	down
F01_cb16438_c1924/f1p0/1632	0	4	5	117	234	230	0	0.16	0.23	7.26	11.37	11.3	2.34558e-15	6.39357	up
F01_cb16438_c1925/f3p0/1928	177	88	85	34	20	24	5.49	2.85	3.27	1.75	0.8	0.99	0.0369291	-1.62675	down
F01_cb16438_c19446/f2p1/3955	270	382	351	10	0	13	3.8	5.63	6.14	0.24	0	0.25	3.61955e-18	-5.03524	down
F01_cb16438_c19572/f2p0/1964	354	305	283	0	0	0	10.72	9.67	10.65	0	0	0	1.25152e-34	#NAME?	down
F01_cb16438_c19823/f1p0/3311	711	374	491	46	25	99	12.54	6.91	10.76	1.33	0.58	2.28	1.9481e-08	-2.76915	down
F01_cb16438_c19930/f3p0/3479	136	93	114	0	0	0	2.24	1.6	2.33	0	0	0	3.33984e-16	#NAME?	down
F01_cb16438_c19976/f1p0/2390	65	84	94	18	8	9	1.59	2.13	2.85	0.72	0.28	0.28	0.0053243	-2.30738	down
F01_cb16438_c20044/f1p5/2177	109	27	59	0	0	0	2.93	0.76	1.97	0	0	0	3.2806e-05	#NAME?	down
F01_cb16438_c20734/f1p1/3701	265	202	164	0	0	0	4.1	3.28	3.16	0	0	0	3.99612e-26	#NAME?	down
F01_cb16438_c20751/f1p0/3569	190	35	102	0	0	0	2.97	0.58	1.99	0	0	0	8.8628e-05	#NAME?	down
F01_cb16438_c20753/f1p0/1927	83	87	72	4	0	0	2.59	2.85	2.78	0.24	0	0	3.05333e-09	-5.33732	down
F01_cb16438_c20907/f1p0/3228	336	337	204	0	0	1	5.94	6.23	4.48	0	0	0.03	1.30126e-31	-9.45291	down
F01_cb16438_c21012/f1p1/2743	117	21	81	0	0	1	2.44	0.46	2.1	0	0	0.03	0.000796558	-7.44816	down
F01_cb16438_c21193/f1p0/2451	273	91	107	0	0	0	7.07	2.49	3.46	0	0	0	2.91347e-07	#NAME?	down
F01_cb16438_c21267/f1p7/3667	57	35	30	0	0	0	0.89	0.57	0.58	0	0	0	8.19406e-07	#NAME?	down
F01_cb16438_c21685/f1p0/3324	0	0	0	33	69	62	0	0	0	0.93	1.56	1.41	6.00235e-13	Inf	up
F01_cb16438_c23281/f1p0/2021	28	36	43	0	0	0	0.83	1.11	1.59	0	0	0	3.53762e-06	#NAME?	down
F01_cb16438_c23332/f1p7/3606	30	117	38	0	0	0	0.47	1.91	0.73	0	0	0	0.0103977	#NAME?	down
F01_cb16438_c23479/f1p0/4135	157	87	225	0	1	0	2.09	1.22	3.73	0	0.02	0	1.16226e-06	-8.32365	down
F01_cb16438_c23535/f1p6/3722	103	385	53	0	0	0	1.59	6.22	1.02	0	0	0	0.0358261	#NAME?	down
F01_cb16438_c23649/f1p1/2077	192	117	94	0	0	0	5.46	3.48	3.32	0	0	0	2.86057e-18	#NAME?	down
F01_cb16438_c23739/f1p0/1753	1126	1351	1337	17	24	36	38.93	48.92	57.45	0.97	1.1	1.65	9.58907e-24	-5.18806	down
F01_cb16438_c2390/f1p1/3468	430	403	267	77	77	40	7.2	7.05	5.55	2.09	1.67	0.88	1.55386e-05	-1.95758	down
F01_cb16438_c24027/f1p2/3568	43	30	105	0	0	0	0.68	0.5	2.05	0	0	0	0.0108487	#NAME?	down
F01_cb16438_c24061/f1p3/2252	58	104	53	0	0	0	1.5	2.8	1.71	0	0	0	3.72003e-09	#NAME?	down
F01_cb16438_c24138/f1p0/2659	25	37	28	1	0	0	0.54	0.83	0.75	0.04	0	0	0.000214356	-5.92354	down
F01_cb16438_c24181/f1p4/3751	619	262	46	0	0	0	9.63	4.27	0.89	0	0	0	0.00226853	#NAME?	down
F01_cb16438_c2424/f1p0/3412	162	98	141	0	13	0	2.65	1.68	2.88	0	0.29	0	5.72011e-11	-4.36476	down
F01_cb16438_c24286/f1p4/2688	34	109	102	0	0	0	0.74	2.5	2.76	0	0	0	1.59721e-05	#NAME?	down
F01_cb16438_c24668/f1p0/4007	382	504	338	0	0	0	5.87	8.11	6.44	0	0	0	1.32045e-39	#NAME?	down
F01_cb16438_c24703/f1p2/2817	83	34	156	0	0	0	1.68	0.73	3.92	0	0	0	0.00369777	#NAME?	down
F01_cb16438_c24821/f1p0/4015	84	56	168	5	0	0	1.17	0.8	2.87	0.12	0	0	0.0114241	-5.41504	down
F01_cb16438_c2571/f4p2/2178	836	471	612	112	92	260	22.51	13.27	20.48	4.94	3.22	9.13	0.00296234	-1.60244	down
F01_cb16438_c2577/f1p0/1846	133	131	102	2	8	1	4.5	4.64	4.29	0.12	0.37	0.06	1.66637e-10	-4.49169	down
F01_cb16438_c2767/f1p0/2085	110	71	68	3	0	0	3.13	2.13	2.39	0.14	0	0	5.49579e-10	-5.77258	down
F01_cb16438_c2804/f4p4/2707	495	434	553	0	0	0	10.44	9.59	14.5	0	0	0	1.0526e-42	#NAME?	down
F01_cb16438_c2935/f2p0/2258	2	0	5	16	31	17	0.06	0	0.17	0.71	1.06	0.6	0.00533497	3.62942	up
F01_cb16438_c30276/f1p0/1891	2	5	0	32	56	42	0.09	0.2	0	1.69	2.32	1.76	3.92355e-07	4.75253	up
F01_cb16438_c30646/f1p2/2716	31	22	23	0	0	0	0.66	0.5	0.61	0	0	0	0.000255663	#NAME?	down
F01_cb16438_c3118/f4p0/2242	92	110	30	0	0	0	2.42	3.02	0.98	0	0	0	3.64742e-06	#NAME?	down
F01_cb16438_c3126/f1p1/2232	293	288	221	45	16	0	7.65	7.86	7.17	1.93	0.56	0	3.44552e-11	-3.12795	down
F01_cb16438_c32342/f2p0/2152	277	167	192	47	75	43	7.55	4.77	6.51	2.1	2.64	1.53	0.0172625	-1.41722	down
F01_cb16438_c32661/f2p0/2840	261	251	162	90	0	25	5.22	5.26	4.03	2.95	0	0.67	0.00402759	-2.00817	down
F01_cb16438_c33114/f1p0/1825	25	41	36	5	1	3	0.85	1.42	1.5	0.3	0.05	0.17	0.0229118	-3.03267	down
F01_cb16438_c3322/f1p0/2071	35	29	29	2	0	2	1.01	0.89	1.06	0.11	0	0.09	0.00362121	-4.08554	down
F01_cb16438_c33295/f1p0/1680	30	29	21	0	0	0	1.09	1.1	0.95	0	0	0	0.000150404	#NAME?	down
F01_cb16438_c33733/f4p0/2662	248	269	194	22	85	61	5.34	6.06	5.19	0.78	2.37	1.73	0.00406621	-1.58929	down
F01_cb16438_c33846/f1p0/2775	214	158	167	5	89	4	4.56	3.53	4.43	0.17	2.45	0.11	0.043474	-1.88168	down
F01_cb16438_c33904/f1p0/1788	141	124	76	21	18	35	4.78	4.41	3.2	1.18	0.79	1.57	0.0331866	-1.72222	down
F01_cb16438_c33926/f6p4/1762	62	54	80	0	0	0	2.14	1.96	3.43	0	0	0	1.77182e-10	#NAME?	down
F01_cb16438_c34134/f1p0/3416	170	138	142	17	30	16	2.79	2.37	2.9	0.46	0.64	0.34	9.50926e-05	-2.31755	down
F01_cb16438_c34179/f1p1/3346	674	420	576	3	0	3	11.37	7.43	12.06	0.1	0	0.08	3.34968e-38	-7.66787	down
F01_cb16438_c34857/f1p0/2289	233	221	141	31	72	62	5.9	5.85	4.43	1.28	2.35	2.05	0.0432789	-1.34841	down
F01_cb16438_c35063/f1p0/1758	15	24	16	69	64	70	0.53	0.91	0.74	4.01	2.95	3.22	0.00141894	2.36527	up
F01_cb16438_c35237/f1p0/2563	38	59	54	0	18	0	0.98	1.57	1.72	0	0.62	0	0.0141053	-2.51282	down
F01_cb16438_c35489/f1p0/2040	331	268	183	2	0	0	9.6	8.13	6.59	0.1	0	0	4.52974e-28	-8.00523	down
F01_cb16438_c35562/f1p0/4017	170	86	143	1	0	0	2.33	1.24	2.44	0.02	0	0	5.12774e-16	-8.05461	down
F01_cb16438_c36162/f1p0/1987	135	104	88	38	17	19	4.05	3.27	3.29	1.87	0.69	0.77	0.0489112	-1.61162	down
F01_cb16438_c36243/f1p0/2570	186	205	88	17	33	0	4.2	4.83	2.48	0.63	0.96	0	0.000499239	-2.65234	down
F01_cb16438_c36501/f1p1/2992	82	49	67	0	5	4	1.56	0.97	1.59	0	0.12	0.1	1.00007e-05	-3.98902	down
F01_cb16438_c36664/f1p0/2176	135	53	70	1	0	0	3.98	1.64	2.58	0.05	0	0	9.3394e-09	-7.39438	down
F01_cb16438_c37466/f2p1/3048	54	42	5	113	134	103	1.01	0.82	0.13	3.44	3.21	2.5	6.79443e-05	2.37365	up
F01_cb16438_c3806/f4p5/2622	1036	972	645	91	128	99	22.65	22.24	17.51	3.27	3.63	2.85	2.93579e-08	-2.5425	down
F01_cb16438_c38079/f1p0/3572	44	49	30	0	0	6	0.71	0.83	0.61	0	0	0.14	0.000856832	-4.04026	down
F01_cb16438_c38280/f1p0/3293	200	232	128	32	29	49	3.41	4.15	2.71	0.91	0.64	1.09	0.00132576	-1.86911	down
F01_cb16438_c38503/f2p0/1715	156	167	124	243	238	369	5.55	6.22	5.47	14.2	10.92	17.13	0.00816169	1.3996	up
F01_cb16438_c38668/f1p0/2005	33	41	31	0	0	1	0.99	1.3	1.15	0	0	0.04	3.71231e-05	-6.41279	down
F01_cb16438_c39061/f1p0/3168	248	287	193	8	21	24	4.38	5.31	4.24	0.24	0.49	0.56	6.9003e-11	-3.31204	down
F01_cb16438_c39094/f9p7/2686	1963	1230	1142	202	416	268	41.75	27.39	30.18	7.03	11.43	7.44	0.0036116	-1.763	down
F01_cb16438_c39242/f1p0/2127	48	51	64	11	12	0	1.34	1.49	2.23	0.54	0.45	0.03	0.0253054	-2.26767	down
F01_cb16438_c39594/f1p0/2987	957	756	607	8	4	6	18.12	14.98	14.29	0.27	0.1	0.15	7.33339e-35	-6.49697	down
F01_cb16438_c40522/f3p2/2556	351	214	217	50	43	28	7.9	5.04	6.07	1.84	1.25	0.84	6.94517e-06	-2.14875	down
F01_cb16438_c40654/f1p0/1789	143	173	156	11	28	51	4.89	6.19	6.62	0.65	1.26	2.28	0.00215339	-1.97133	down
F01_cb16438_c40719/f1p0/2179	84	120	77	401	225	397	2.25	3.35	2.55	17.49	7.76	13.8	3.17748e-06	2.34113	up
F01_cb16438_c40790/f1p0/1562	423	424	419	6	6	6	16.89	17.73	20.76	0.45	0.32	0.35	9.77792e-28	-5.64799	down
F01_cb16438_c40884/f1p0/2541	125	110	114	9	34	1	2.84	2.62	3.21	0.35	1.02	0.04	0.000201718	-2.41461	down
F01_cb16438_c41040/f1p0/1666	622	831	291	0	0	0	24.25	33.94	14.11	0	0	0	1.75999e-13	#NAME?	down
F01_cb16438_c41358/f1p0/2620	80	65	47	0	0	0	1.79	1.52	1.29	0	0	0	3.77538e-10	#NAME?	down
F01_cb16438_c41690/f1p0/2706	144	131	123	19	7	10	3.02	2.88	3.2	0.66	0.21	0.28	2.32929e-06	-2.95544	down
F01_cb16438_c42665/f3p1/2300	220	125	110	0	10	7	5.57	3.32	3.47	0	0.35	0.26	3.40878e-11	-4.235	down
F01_cb16438_c42673/f2p1/2227	441	287	273	58	47	63	11.58	7.91	8.91	2.5	1.62	2.19	9.18783e-06	-2.0701	down
F01_cb16438_c43158/f1p0/1665	48	32	33	2	0	0	1.67	1.15	1.43	0.11	0	0.03	6.37603e-05	-5.22379	down
F01_cb16438_c43329/f2p2/2623	68	23	89	0	0	0	1.5	0.54	2.43	0	0.02	0	0.000462148	#NAME?	down
F01_cb16438_c4364/f1p0/3463	31	7	13	56	58	39	0.5	0.12	0.27	1.49	1.2	0.82	0.0253054	2.15368	up
F01_cb16438_c43876/f1p0/3053	654	638	445	0	0	0	12.02	12.29	10.16	0	0	0	1.15626e-44	#NAME?	down
F01_cb16438_c43984/f1p0/2784	227	242	223	78	47	60	4.64	5.17	5.66	2.61	1.25	1.61	0.0182403	-1.41224	down
F01_cb16438_c44324/f1p0/2419	134	142	100	16	10	28	3.21	3.56	2.97	0.66	0.32	0.88	0.000494884	-2.34716	down
F01_cb16438_c44581/f1p1/2226	42	21	20	1	0	3	1.11	0.58	0.67	0.04	0	0.1	0.0117619	-3.95768	down
F01_cb16438_c4461/f2p0/2721	1040	1052	991	56	83	132	21.82	23.09	25.81	1.92	2.25	3.61	1.22178e-10	-3.05924	down
F01_cb16438_c4468/f1p0/1840	306	160	193	0	0	0	9.96	5.45	7.8	0	0	0	9.81381e-26	#NAME?	down
F01_cb16438_c44864/f1p1/3523	100	124	118	11	9	0	1.64	2.14	2.41	0.31	0.2	0	1.46354e-07	-3.53101	down
F01_cb16438_c45042/f1p0/1922	72	33	64	0	4	0	2.26	1.08	2.49	0	0.16	0	1.87513e-06	-4.81934	down
F01_cb16438_c45046/f3p0/3363	21	52	35	2	3	5	0.36	0.92	0.74	0.07	0.06	0.13	0.0212701	-3.01214	down
F01_cb16438_c45047/f2p0/3622	54	78	79	149	97	185	0.83	1.26	1.52	3.74	1.92	3.71	0.0118131	1.47275	up
F01_cb16438_c45143/f1p0/2167	479	323	288	49	0	0	13.82	9.77	10.34	2.34	0	0	3.81216e-17	-3.87186	down
F01_cb16438_c45156/f1p0/2169	225	271	257	46	37	101	6.08	7.67	8.63	2.03	1.29	3.56	0.00520907	-1.61091	down
F01_cb16438_c45747/f1p0/2429	21	2	19	51	67	50	0.51	0.06	0.58	2.02	2.07	1.56	0.00209802	2.50574	up
F01_cb16438_c50468/f1p0/1974	1396	1307	894	336	258	295	41.8	40.98	33.26	16.51	9.99	11.53	0.0190897	-1.50519	down
F01_cb16438_c54562/f2p0/2090	58	103	75	2	7	7	1.66	3.07	2.66	0.1	0.25	0.28	2.53296e-05	-3.43529	down
F01_cb16438_c55186/f9p0/1854	125	128	39	334	511	255	4.07	4.34	1.59	17.79	21.35	10.78	0.0195778	2.47727	up
F01_cb16438_c55577/f2p10/2992	122	93	389	0	0	0	2.31	1.84	9.14	0	0	0	0.00879662	#NAME?	down
F01_cb16438_c55831/f2p5/3730	220	363	160	0	0	0	3.29	5.66	2.96	0	0	0	2.41993e-12	#NAME?	down
F01_cb16438_c58581/f2p6/1934	8377	6443	5380	5	0	5	258.24	207.96	206.11	0.26	0	0.22	3.19257e-17	-10.5124	down
F01_cb16438_c59863/f1p12/2114	91	33	65	0	0	0	2.55	0.97	2.28	0	0	0	2.12948e-08	#NAME?	down
F01_cb16438_c59927/f1p1/1998	108	141	84	144	185	295	3.3	4.52	3.2	7.22	7.3	11.78	0.0129293	1.36784	up
F01_cb16438_c60202/f1p0/2108	195	146	152	13	29	19	5.7	4.48	5.53	0.63	1.12	0.76	1.13438e-05	-2.50672	down
F01_cb16438_c615/f2p0/1969	0	0	5	35	16	30	0	0	0.19	1.78	0.63	1.19	0.000109072	4.33933	up
F01_cb16438_c674/f3p0/2953	365	548	694	26	28	56	7	11	16.52	0.82	0.69	1.41	0.000175437	-3.46232	down
F01_cb16438_c69027/f1p16/3596	63	391	80	0	0	0	0.98	6.33	1.54	0	0	0	0.0473514	#NAME?	down
F01_cb16438_c72488/f1p0/2111	44	41	59	0	0	0	1.24	1.2	2.06	0	0	0	4.58143e-08	#NAME?	down
F01_cb16438_c782/f2p1/2451	47	33	56	4	2	4	1.11	0.81	1.64	0.15	0.06	0.12	0.00226853	-3.30638	down
F01_cb16438_c7924/f8p2/2534	785	555	559	147	169	232	17.82	13.19	15.77	5.46	4.97	6.88	0.0313858	-1.30951	down
F01_cb16438_c814/f1p1/2406	0	0	0	124	42	183	0	0	0	4.9	1.33	5.77	6.69983e-08	Inf	up
F01_cb16438_c824/f2p0/1625	39	61	41	0	0	0	1.47	2.42	1.93	0	0	0	7.08549e-08	#NAME?	down
F01_cb16438_c8567/f4p1/3191	145	151	74	228	161	301	2.56	2.79	1.64	6.54	3.65	6.92	0.0120774	1.39114	up
F01_cb16438_c8807/f1p8/2539	52	129	88	0	0	0	1.19	3.07	2.48	0	0	0	8.15606e-08	#NAME?	down
F01_cb16438_c9251/f2p0/2080	114	109	104	0	0	0	3.23	3.25	3.67	0	0	0	1.27673e-15	#NAME?	down
F01_cb16438_c9523/f1p3/3731	78	137	94	1	0	3	1.15	2.13	1.72	0.02	0	0.06	6.83552e-11	-5.90789	down
F01_cb16445_c2/f1p0/870	102	94	120	7	5	3	8.71	8.41	12.72	1.09	0.61	0.44	6.68512e-08	-3.88351	down
F01_cb16452_c1/f1p0/1085	253	198	188	64	87	27	15.86	13.03	14.66	6.73	7.06	2.27	0.034358	-1.29178	down
F01_cb16460_c2/f1p0/1288	397	373	312	53	40	71	19.95	19.66	19.5	4.49	2.61	4.73	1.14328e-06	-2.24793	down
F01_cb16498_c20/f1p0/1284	655	634	405	0	0	0	34.88	35.4	26.82	0	0	0	2.07415e-44	#NAME?	down
F01_cb16498_c5/f1p1/1302	81	89	44	0	8	0	4.04	4.67	2.75	0	0.57	0	1.48276e-06	-4.13938	down
F01_cb16543_c0/f5p0/1408	465	315	263	93	156	66	20.95	14.84	14.73	6.95	9.08	3.93	0.0435234	-1.17459	down
F01_cb16545_c8/f1p0/1441	3	13	7	37	27	53	0.17	0.64	0.42	2.75	1.57	3.12	0.00280608	2.77309	up
F01_cb16559_c16/f1p4/1505	166	155	191	23	57	37	6.89	6.77	9.88	1.61	3.09	2.02	0.00912586	-1.64559	down
F01_cb16576_c1/f1p0/1285	77	25	11	120	108	291	4	1.36	0.71	10.37	7.25	19.77	0.0260918	2.72602	up
F01_cb1657_c3/f1p0/3678	209	722	381	2338	1574	1057	3.14	11.35	7.11	56.94	30.42	20.64	0.0435068	2.41844	up
F01_cb1665_c12/f1p0/2383	185	132	163	44	27	30	4.51	3.38	4.93	1.75	0.87	0.96	0.00539201	-1.74357	down
F01_cb16944_c3/f1p0/632	33	63	77	0	0	0	4.61	9.36	13.46	0	0	0	2.43736e-06	#NAME?	down
F01_cb17008_c10/f1p0/1279	80	86	60	222	161	146	4.6	5.21	4.32	21.35	11.96	11	0.00269202	1.74444	up
F01_cb17051_c2/f2p0/970	66	58	85	1	0	0	4.85	4.42	7.74	0.12	0	0	5.18083e-10	-7.1482	down
F01_cb17057_c16/f1p0/1073	163	73	74	0	0	5	10.38	4.88	5.88	0	0	0.49	8.33087e-08	-5.60701	down
F01_cb17059_c1/f1p0/1009	839	1058	1024	1	0	0	57.7	76.27	87.63	0.12	0	0	1.56571e-46	-10.9488	down
F01_cb17067_c0/f3p0/866	455	266	261	99	78	68	38.84	23.85	27.79	14.41	8.63	7.64	0.00422395	-1.46716	down
F01_cb17132_c1/f1p0/838	31	18	30	151	114	137	2.79	1.69	3.35	23.19	13.31	16.24	1.12588e-07	2.83533	up
F01_cb17255_c3/f1p0/750	105	76	84	13	4	17	11	8.37	11.02	2.39	0.6	2.4	0.00168611	-2.50633	down
F01_cb17283_c7/f6p0/529	85	53	25	13	0	0	16.52	10.84	6.23	4.89	0	0	0.0192688	-3.01175	down
F01_cb17294_c0/f1p0/694	638	402	475	175	90	130	76.11	50.3	70.56	36.51	14.01	20.62	0.00656207	-1.4324	down
F01_cb1731_c67/f1p1/3042	419	439	324	127	83	116	7.8	8.56	7.5	3.86	2	2.82	0.0135423	-1.36329	down
F01_cb17330_c1/f1p0/896	192	158	164	0	0	0	14.94	12.83	15.81	0	0	0	1.54767e-22	#NAME?	down
F01_cb17373_c27/f8p0/1305	56	64	43	14	0	9	2.81	3.32	2.67	1.21	0	0.61	0.0287733	-2.33964	down
F01_cb17378_c0/f4p0/820	65	48	70	646	621	2413	6	4.65	8.05	102.34	74.51	293.76	0.0363062	4.72468	up
F01_cb17447_c8/f7p0/539	170	82	87	19	0	0	31.53	16.09	20.18	6.62	0	0	3.46432e-06	-3.54168	down
F01_cb17484_c18/f7p0/1228	3000	2745	2590	0	0	0	160.01	153.44	171.85	0	0	0	8.04748e-39	#NAME?	down
F01_cb1748_c4/f1p0/2549	0	0	3	37	48	27	0	0	0.08	1.38	1.41	0.79	9.98216e-08	5.57788	up
F01_cb17572_c1/f1p0/734	0	17	0	31	79	69	0	1.99	0	5.92	11.19	9.9	0.000273857	3.86821	up
F01_cb1759_c23/f1p0/3488	297	292	90	0	0	0	4.87	5	1.84	0	0	0	9.42179e-10	#NAME?	down
F01_cb17695_c4/f1p0/1104	69	59	25	0	0	0	4.21	3.77	1.9	0	0	0	2.629e-08	#NAME?	down
F01_cb17760_c6/f1p0/928	0	1	0	57	27	34	0	0.15	0	7.57	2.72	3.52	6.61667e-07	7.38061	up
F01_cb17776_c1/f1p0/1086	41	43	36	7	0	0	2.56	2.82	2.8	0.73	0	0	0.00187336	-3.51862	down
F01_cb17864_c2/f1p0/1545	52	71	58	3	23	3	2.1	2.99	2.92	0.23	1.21	0.19	0.0363062	-2.10026	down
F01_cb17935_c6/f1p0/1578	3732	391	1276	0	0	1	174.69	19.19	74.25	0	0	0.06	0.000238297	-12.0217	down
F01_cb18016_c9/f1p0/1113	1370	662	1296	136	290	216	85.38	43.25	100.46	14.26	23.47	17.72	0.0185089	-1.88325	down
F01_cb1813_c42/f1p0/2221	306	297	296	35	147	11	9.25	9.43	11.13	1.74	5.76	0.43	0.0313402	-1.65876	down
F01_cb1813_c44/f1p0/2097	300	209	161	0	0	0	8.64	6.29	5.77	0	0	0	2.90757e-27	#NAME?	down
F01_cb18178_c4/f1p0/774	51	65	58	6	4	7	5.07	6.77	7.25	1.06	0.58	0.92	0.00246038	-2.89559	down
F01_cb18197_c7/f2p1/1499	172	88	22	0	0	0	7.2	3.87	1.14	0	0	0	0.00145565	#NAME?	down
F01_cb18199_c4/f1p1/1495	118	111	127	14	19	9	5.04	5	6.78	0.99	1.05	0.51	9.12408e-05	-2.56865	down
F01_cb18319_c10/f1p1/697	47	57	80	2	8	17	5.63	7.15	11.8	0.41	1.32	2.66	0.0224637	-2.3916	down
F01_cb18319_c13/f1p0/870	92	87	98	7	22	21	7.81	7.75	10.42	1.05	2.42	2.4	0.0168864	-2.00916	down
F01_cb18319_c8/f1p0/655	68	79	109	8	21	23	8.94	10.89	17.92	1.85	3.66	3.99	0.0485741	-1.86761	down
F01_cb1834_c3/f1p0/2260	182	224	115	374	303	269	4.67	6.01	3.66	15.69	10.01	8.99	0.0163585	1.38245	up
F01_cb18439_c1/f1p0/870	114	265	35	0	0	0	9.66	23.57	3.76	0	0	0	0.00883923	#NAME?	down
F01_cb18462_c0/f2p0/1293	249	193	264	80	34	79	12.49	10.1	16.41	6.65	2.2	5.17	0.0225435	-1.40707	down
F01_cb18496_c2/f2p0/1062	74	124	64	0	0	0	4.81	8.41	5.16	0	0	0	6.51638e-11	#NAME?	down
F01_cb18592_c4/f3p0/654	368	412	488	120	75	54	48.34	56.9	79.94	27.88	12.88	9.57	0.000258367	-1.8456	down
F01_cb18609_c3/f1p0/725	1026	835	791	93	148	141	120.89	103.32	116.23	19.34	22.83	22.06	1.08424e-06	-2.30257	down
F01_cb18707_c1/f2p1/1056	459	429	451	0	0	0	29.78	29.18	36.47	0	0	0	3.74556e-41	#NAME?	down
F01_cb18833_c1/f1p2/918	329	207	274	18	83	49	25.89	17.12	26.82	2.4	8.48	5.06	8.77424e-05	-1.9322	down
F01_cb18833_c5/f1p0/850	593	481	469	69	180	181	52.2	44.4	51.41	10.39	20.58	21	0.0164979	-1.36582	down
F01_cb18833_c6/f1p1/892	495	462	507	30	158	155	41.94	41.04	53.53	4.34	17.45	17.4	0.00132551	-1.63935	down
F01_cb18850_c2/f1p0/852	79	78	18	0	0	0	6.91	7.18	2.02	0	0	0	7.06983e-05	#NAME?	down
F01_cb1891_c7/f1p0/2344	0	0	30	62	43	45	0	0	0.95	2.54	1.4	1.46	0.000720017	2.66201	up
F01_cb19085_c0/f1p0/812	49	27	56	0	0	1	4.61	2.67	6.57	0	0	0.12	1.51738e-06	-6.75441	down
F01_cb1922_c25/f1p0/2389	79	133	110	16	13	0	1.91	3.36	3.32	0.67	0.43	0	1.49918e-05	-2.91534	down
F01_cb19296_c1/f2p0/614	969	525	473	84	188	206	141.71	80.67	86.36	22.16	35.97	40.24	0.015953	-1.53689	down
F01_cb19326_c1/f1p1/1207	56	68	77	2	0	1	3.05	3.86	5.21	0.25	0	0.08	2.67891e-08	-5.59546	down
F01_cb19348_c0/f2p0/692	59	51	50	1	9	14	7.14	6.51	7.53	0.34	1.53	2.26	0.0432914	-2.30814	down
F01_cb19389_c1/f1p0/1189	46	71	40	136	158	92	2.56	4.13	2.77	12.63	11.36	6.7	0.0162366	1.81654	up
F01_cb19411_c4/f1p0/1546	61	93	25	0	0	0	2.46	3.95	1.27	0	0	0	7.0228e-05	#NAME?	down
F01_cb19443_c0/f7p0/992	1116	427	804	139	160	174	78.81	31.63	70.67	16.67	14.69	16.18	0.0353171	-1.80986	down
F01_cb19461_c3/f1p0/906	167	183	180	0	0	0	15.02	17.2	20.12	0	0	0	3.41926e-23	#NAME?	down
F01_cb19461_c8/f1p1/692	545	554	434	1	0	0	64.19	68.56	63.77	0.22	0	0	1.05076e-41	-9.9961	down
F01_cb19469_c0/f1p0/706	24	20	13	44	85	53	2.86	2.44	2	8.93	12.93	8.3	0.0244875	2.20598	up
F01_cb19469_c2/f1p0/1163	20	101	15	122	238	146	1.17	6.08	1.07	11.76	17.64	10.99	0.0418024	2.39999	up
F01_cb19471_c1/f2p0/1291	85	132	97	14	21	34	4.26	6.97	6.08	1.17	1.36	2.23	0.044125	-1.7481	down
F01_cb19496_c141/f4p2/1150	208	21	188	6	2	0	12.11	1.29	13.61	0.58	0.17	0	0.0417315	-5.12132	down
F01_cb19496_c174/f2p0/512	210	215	192	15	30	108	43.23	46.57	49.5	5.92	8.32	29.94	0.0126275	-1.62199	down
F01_cb19496_c330/f1p0/1205	42	34	41	0	0	0	2.29	1.95	2.81	0	0	0	1.19726e-06	#NAME?	down
F01_cb19496_c634/f1p4/6117	22426	8836	27483	27	0	0	203.01	83.68	308.88	0.4	0	0	0.00984526	-10.527	down
F01_cb19496_c637/f1p11/6259	63	11336	26912	14	1	11	0.54	101.97	287.28	0.2	0.01	0.13	0.0261343	-10.1731	down
F01_cb19496_c640/f1p1/6080	132	223	44	0	0	0	1.28	2.24	0.53	0	0	0	0.000183014	#NAME?	down
F01_cb19496_c660/f1p9/4502	36	68	33	0	0	0	0.44	0.88	0.51	0	0	0	6.61667e-07	#NAME?	down
F01_cb19556_c0/f2p0/827	72	132	57	228	377	362	6.58	12.62	6.57	35.7	44.7	43.51	2.35677e-07	2.37521	up
F01_cb19682_c1526/f1p0/581	514	583	732	53	77	137	97.87	116.82	174.27	18.94	19.44	35.17	5.19731e-05	-2.3568	down
F01_cb19682_c1556/f1p0/747	274	519	439	73	38	31	39.16	77.8	78.17	18.66	7.26	5.88	0.000597146	-2.62134	down
F01_cb19682_c1802/f1p1/1528	204	90	137	32	15	30	8.31	3.86	6.95	2.19	0.81	1.64	0.00311207	-1.9857	down
F01_cb19682_c1876/f4p1/581	1492	515	1401	64	91	77	242.08	87.97	283.93	18.82	19.39	16.74	0.00318619	-3.38384	down
F01_cb19682_c423/f3p0/775	122	41	38	6	0	0	12.29	4.4	4.85	1.11	0	0	0.0134513	-4.42056	down
F01_cb19682_c425/f3p0/616	36	70	47	3	0	5	5.23	10.69	8.53	0.78	0	0.97	0.000186206	-3.86155	down
F01_cb19682_c623/f1p0/681	2215	1961	1844	60	66	138	346.32	322.16	359.9	16.9	13.56	28.77	8.00447e-13	-4.06451	down
F01_cb19861_c3/f1p0/1205	110	107	94	0	0	22	6.01	6.12	6.39	0	0	1.57	3.36244e-06	-3.51436	down
F01_cb19861_c4/f1p1/1326	131	103	95	5	7	4	6.36	5.29	5.78	0.4	0.46	0.27	6.11781e-08	-3.83402	down
F01_cb20013_c0/f2p0/599	845	551	321	77	176	92	129.07	88.41	61.33	21.31	35.18	18.79	0.0281405	-1.75844	down
F01_cb20054_c1/f1p0/749	60	46	33	2	1	0	6.44	5.2	4.42	0.4	0.16	0	1.3704e-05	-4.92755	down
F01_cb20078_c14/f1p0/1135	625	540	532	1	2	2	36.89	33.44	39.09	0.1	0.17	0.17	3.89319e-39	-7.92796	down
F01_cb20078_c7/f1p0/1068	293	118	176	29	37	28	18.76	7.97	14.06	3.2	3.1	2.36	0.00544194	-2.11179	down
F01_cb20148_c5/f4p0/689	139	174	71	9	19	8	16.79	22.07	10.8	2.03	3.08	1.29	0.0004603	-2.86886	down
F01_cb20351_c1/f1p0/1101	136	131	104	0	0	0	8.35	8.43	7.94	0	0	0	3.02178e-17	#NAME?	down
F01_cb20381_c1/f1p0/1062	83	118	85	37	24	0	5.4	7.97	6.83	4.05	2.03	0	0.045024	-1.65675	down
F01_cb20435_c15/f2p0/1429	106	92	59	0	1	2	4.72	4.27	3.24	0	0.06	0.12	2.93716e-10	-5.99404	down
F01_cb20514_c1/f1p0/909	102	29	38	0	0	2	8.18	2.47	3.83	0	0	0.25	0.00264895	-6.03769	down
F01_cb20516_c0/f2p0/720	79	60	43	0	0	0	8.88	7.08	6.02	0	0	0	1.06897e-09	#NAME?	down
F01_cb20521_c4/f1p0/745	298	42	191	367	866	816	31.37	4.64	25.06	66.94	118.63	113.54	0.00716385	2.45284	up
F01_cb20524_c11/f1p0/4327	1459	1116	1244	207	375	267	18.33	14.67	19.41	4.21	6.08	4.36	0.00634213	-1.66731	down
F01_cb20524_c6/f1p0/4105	154	33	43	0	0	0	2.07	0.47	0.73	0	0	0	0.00576155	#NAME?	down
F01_cb2054_c1/f1p0/3495	2	8	6	29	23	42	0.04	0.14	0.13	0.77	0.48	0.89	0.00417356	2.97038	up
F01_cb20684_c1/f2p0/847	273	115	167	32	52	37	24.03	10.62	18.35	4.82	5.94	4.29	0.027018	-1.67019	down
F01_cb20714_c2/f1p0/1331	582	770	859	136	145	172	29.44	40.79	54.02	11.5	9.5	11.42	0.000765878	-1.83257	down
F01_cb20723_c1/f1p0/1167	104	75	59	11	6	17	5.93	4.52	4.24	1.05	0.46	1.32	0.00694662	-2.33289	down
F01_cb20997_c1/f1p0/797	93	67	58	17	4	10	8.93	6.77	6.9	2.79	0.6	1.26	0.00962186	-2.29635	down
F01_cb209_c16/f1p0/4798	226	181	174	15	11	25	2.59	2.18	2.48	0.28	0.16	0.39	2.55777e-08	-3.04964	down
F01_cb21018_c14/f1p0/1338	80	125	97	0	9	7	3.87	6.29	5.83	0	0.58	0.49	3.03362e-07	-3.7885	down
F01_cb21018_c29/f1p0/640	84	64	45	1	0	0	11.55	9.18	7.67	0.24	0	0	3.51984e-09	-6.98445	down
F01_cb21018_c4/f1p0/893	23	10	3	51	41	57	1.9	0.91	0.35	7.11	4.38	6.19	0.00309565	2.61926	up
F01_cb210_c0/f2p1/3950	64	48	58	4	7	4	0.91	0.71	1.02	0.11	0.13	0.08	0.00159656	-2.99132	down
F01_cb21121_c0/f1p0/1398	96	94	93	3	2	17	4.36	4.47	5.3	0.25	0.15	1.03	1.73232e-05	-3.31768	down
F01_cb21146_c9/f1p0/617	35	91	35	276	388	241	5.24	14.26	6.51	73.62	75.46	47.77	9.5212e-06	2.99556	up
F01_cb2115_c12/f1p0/3345	387	347	352	8	12	0	6.66	6.25	7.52	0.24	0.28	0	1.72338e-24	-5.18389	down
F01_cb21205_c0/f4p0/1271	143	163	128	14	34	49	7.33	8.77	8.18	1.24	2.25	3.29	0.0156864	-1.71489	down
F01_cb21210_c0/f1p0/893	293	155	166	47	46	30	24.38	13.54	17.22	6.71	5.04	3.3	0.0010298	-1.77337	down
F01_cb21295_c1/f1p0/1353	5	10	7	36	33	45	0.28	0.51	0.46	2.88	2.04	2.8	0.00285524	2.82934	up
F01_cb21353_c0/f1p0/1062	151	104	128	0	0	0	9.72	7.02	10.25	0	0	0	9.97164e-18	#NAME?	down
F01_cb21398_c1/f1p0/534	161	189	175	37	52	53	30.41	37.44	41.39	13.21	13.05	13.57	0.0446297	-1.41398	down
F01_cb21422_c0/f4p0/832	1298	1078	441	139	224	177	117.35	102.2	49.67	21.52	26.37	21.18	0.039316	-1.84278	down
F01_cb21432_c0/f2p0/1056	935	447	632	182	118	195	60.71	30.44	51.02	19.94	9.95	16.6	0.00599327	-1.52759	down
F01_cb21486_c2/f1p0/1492	47	50	51	0	0	1	1.97	2.19	2.65	0	0	0.05	2.70496e-07	-6.91551	down
F01_cb21516_c2/f1p0/818	6	14	12	39	84	67	0.6	1.41	1.43	6.14	10.08	8.11	0.000239486	3.02117	up
F01_cb21518_c0/f3p0/531	92	34	60	97	123	172	17.76	6.83	14.32	34.3	30.87	44.06	0.0118131	1.5641	up
F01_cb21518_c1/f1p0/427	9	8	3	36	101	69	2.69	2.52	1.12	21.63	40.11	28.04	0.0035421	3.90218	up
F01_cb21555_c2/f1p0/1230	106	146	105	10	9	38	5.66	8.15	6.97	0.96	0.64	2.68	0.00182867	-2.25048	down
F01_cb21575_c0/f1p0/1074	134	64	64	130	210	175	8.56	4.28	5.13	13.95	17.38	14.69	0.0107796	1.50616	up
F01_cb21658_c0/f1p0/1089	127	122	114	0	1	1	7.9	7.96	8.89	0	0.08	0.08	6.15244e-15	-7.05547	down
F01_cb21672_c1/f1p0/1536	21	19	19	68	34	59	0.86	0.81	1	4.59	1.8	3.14	0.0397082	1.93282	up
F01_cb21688_c227/f1p0/587	36	103	41	4	0	3	5.91	17.64	8.49	1.25	0	0.85	0.040368	-4.22742	down
F01_cb21769_c2/f1p0/599	119	93	91	0	0	3	18.06	14.88	17.31	0	0	0.66	5.65645e-12	-6.34427	down
F01_cb22009_c11/f2p0/1278	0	0	16	37	28	35	0	0	1.05	3.16	1.9	2.37	0.00200412	2.97065	up
F01_cb22009_c28/f1p0/1487	74	84	81	13	13	16	3.12	3.73	4.28	0.94	0.75	0.89	0.0248237	-2.03854	down
F01_cb22237_c14/f1p11/8509	19772	28264	12366	12	6	4	123.59	184.83	95.96	0.13	0.06	0.04	0.00811312	-10.8752	down
F01_cb22237_c8/f1p15/9309	12739	18023	9893	12	0	0	73.98	109.5	71.33	0.11	0	0	1.06737e-06	-11.1408	down
F01_cb22265_c8/f1p2/4885	176	207	151	29	14	23	1.96	2.41	2.08	0.52	0.21	0.34	5.40553e-06	-2.52496	down
F01_cb22314_c0/f1p0/8202	683	952	667	211	170	274	4.41	6.43	5.34	2.2	1.42	2.3	0.0344814	-1.3475	down
F01_cb22337_c0/f1p0/4537	295	408	632	4	2	10	3.56	5.15	9.48	0.1	0.04	0.16	2.60645e-06	-6.01594	down
F01_cb22351_c3/f1p0/5015	3421	1869	1400	4	0	0	37.44	21.4	19.03	0.08	0	0	6.7936e-23	-10.0825	down
F01_cb2248_c5/f2p0/3276	83	80	109	0	4	0	1.42	1.44	2.33	0	0.1	0	2.05211e-10	-5.52985	down
F01_cb231_c9/f1p0/2948	41	57	90	7	0	0	0.8	1.16	2.15	0.23	0	0	0.00252343	-4.21577	down
F01_cb243_c80/f1p0/3265	99	65	30	0	0	0	1.7	1.17	0.64	0	0	0	1.31399e-07	#NAME?	down
F01_cb2464_c108/f151p1/2166	158	174	102	11	0	48	4.29	4.95	3.46	0.53	0	1.71	0.000113091	-2.50352	down
F01_cb2509_c10/f1p0/2276	60	53	60	4	24	0	1.64	1.52	2.04	0.18	0.87	0	0.0445752	-2.0538	down
F01_cb2535_c1/f1p0/3265	286	252	235	1	0	0	4.88	4.5	4.98	0.03	0	0	4.69745e-29	-9.00926	down
F01_cb2552_c12/f1p1/2170	138	130	122	0	38	45	3.74	3.68	4.09	0	1.34	1.6	0.0156864	-1.79466	down
F01_cb2589_c15/f2p2/2654	40	41	31	0	0	0	0.87	0.95	0.83	0	0	0	2.33262e-06	#NAME?	down
F01_cb2589_c34/f1p0/2633	710	506	682	0	0	22	16.31	12.17	19.46	0	0	0.67	1.68781e-31	-6.12977	down
F01_cb2589_c53/f1p1/2685	1768	1004	1315	392	264	408	37.48	22.27	34.62	13.54	7.22	11.26	0.0495614	-1.4485	down
F01_cb2611_c10/f1p0/5672	243	146	169	81	29	20	2.3	1.45	1.99	1.26	0.36	0.26	0.0152704	-1.54462	down
F01_cb2627_c13/f1p0/2674	54	57	59	10	10	2	1.16	1.28	1.57	0.34	0.3	0.06	0.013798	-2.40413	down
F01_cb2631_c10/f1p0/2582	87	25	55	0	0	0	1.97	0.61	1.54	0	0	0.02	4.70227e-06	#NAME?	down
F01_cb2635_c5/f1p0/2685	346	210	296	37	43	71	7.36	4.7	7.83	1.31	1.19	1.98	3.81826e-05	-2.03555	down
F01_cb2649_c2/f1p0/3041	84	78	134	0	0	11	1.57	1.51	3.08	0	0	0.28	5.21253e-05	-4.47919	down
F01_cb2654_c20/f1p0/2590	228	126	124	33	0	37	5.15	2.97	3.49	1.23	0	1.1	0.000165162	-2.29986	down
F01_cb265_c33/f1p0/4759	96	88	95	10	0	21	1.1	1.05	1.35	0.2	0	0.32	0.000374889	-2.77607	down
F01_cb2660_c23/f1p0/2312	216	179	144	14	44	62	5.43	4.72	4.5	0.58	1.46	2.06	0.00661736	-1.70696	down
F01_cb2660_c30/f1p0/2631	75	74	34	4	3	0	1.7	1.74	0.97	0.15	0.09	0	9.11371e-06	-4.09711	down
F01_cb2680_c10/f1p0/1906	65	67	53	11	0	0	2.43	2.61	2.45	0.7	0	0	8.53746e-05	-3.48717	down
F01_cb2715_c7/f2p0/3020	133	157	150	16	1	13	2.5	3.07	3.5	0.51	0.04	0.32	2.84343e-08	-3.41995	down
F01_cb2729_c22/f1p0/2059	117	120	145	26	29	27	3.47	3.72	5.34	1.28	1.12	1.07	0.0162366	-1.74325	down
F01_cb2729_c3/f2p0/1890	123	119	65	9	11	6	3.9	3.95	2.58	0.51	0.48	0.29	1.89833e-05	-3.01545	down
F01_cb2779_c13/f1p1/2890	176	126	111	11	28	12	3.53	2.66	2.78	0.36	0.72	0.32	5.16977e-05	-2.47777	down
F01_cb2779_c6/f1p1/2732	165	203	132	0	13	0	3.45	4.43	3.42	0	0.37	0	6.58647e-14	-4.68123	down
F01_cb2902_c0/f1p0/3314	60	95	92	11	10	13	1.01	1.68	1.93	0.3	0.22	0.29	0.00355531	-2.40785	down
F01_cb2951_c14/f1p0/3035	0	4	0	14	18	54	0	0.08	0	0.43	0.45	1.32	0.0219961	4.83159	up
F01_cb2986_c4/f1p0/1872	63	125	73	147	179	133	2.05	4.2	2.92	7.76	7.41	5.58	0.049418	1.30686	up
F01_cb30_c2/f1p0/4336	75	123	71	11	11	10	0.95	1.64	1.12	0.23	0.18	0.17	0.000774892	-2.57615	down
F01_cb3130_c13/f1p0/3078	392	310	319	65	61	49	7.12	5.9	7.2	1.92	1.44	1.16	1.12241e-05	-2.0308	down
F01_cb3132_c32/f1p0/1539	179	147	47	0	17	0	7.23	6.22	2.4	0	0.92	0.01	0.00193007	-3.82243	down
F01_cb3155_c29/f2p0/2151	4	0	3	17	23	25	0.12	0	0.13	0.78	0.83	0.92	0.00486481	3.71371	up
F01_cb3211_c0/f1p0/3241	33	27	53	2	2	0	0.58	0.5	1.15	0.07	0.05	0	0.00100871	-4.27537	down
F01_cb3211_c1/f1p0/3343	716	563	539	15	17	17	11.91	9.8	11.13	0.42	0.38	0.39	7.81365e-24	-4.71311	down
F01_cb3243_c0/f1p1/3232	191	216	223	17	5	15	3.33	3.93	4.83	0.48	0.12	0.34	1.87819e-11	-3.62973	down
F01_cb3243_c3/f1p1/2193	490	490	464	41	13	54	13.1	13.71	15.41	1.79	0.47	1.91	2.28571e-13	-3.29528	down
F01_cb3290_c6/f1p0/1911	53	45	39	0	0	0	1.68	1.49	1.54	0	0	0	1.26023e-07	#NAME?	down
F01_cb3296_c21/f1p0/1299	56	36	38	0	14	0	2.79	1.89	2.38	0	0.93	0	0.0188518	-2.61838	down
F01_cb3297_c20/f1p0/2744	272	159	118	16	46	25	5.58	3.42	3.02	0.54	1.24	0.67	0.00162273	-2.11057	down
F01_cb3307_c0/f2p2/2918	215	148	209	37	57	56	4.18	3.02	5.04	1.17	1.44	1.43	0.0260231	-1.45222	down
F01_cb3401_c8/f1p0/1014	44	37	23	0	0	0	3.01	2.66	1.96	0	0	0	7.05076e-06	#NAME?	down
F01_cb3405_c9/f1p0/3132	0	21	0	38	20	28	0	0.41	0	1.15	0.48	0.68	0.0373709	2.52199	up
F01_cb3407_c57/f1p0/1721	149	118	64	24	11	13	5.74	4.76	3.08	1.56	0.56	0.68	0.00133112	-2.23823	down
F01_cb3506_c32/f1p0/2584	233	61	208	0	6	29	5.1	1.42	5.67	0	0.18	0.83	0.0390453	-3.48398	down
F01_cb3509_c17/f1p0/1494	20	43	21	0	0	0	0.85	1.91	1.1	0	0	0	7.91046e-05	#NAME?	down
F01_cb3518_c11/f1p1/1258	188	130	120	9	13	18	9.77	7.08	7.76	0.83	0.94	1.24	1.11325e-06	-2.97052	down
F01_cb3531_c10/f1p1/2980	59	16	10	67	85	59	1.12	0.33	0.25	2.09	2.1	1.47	0.0294731	1.913	up
F01_cb3559_c39/f10p2/2927	386	324	362	98	56	150	7.49	6.56	8.7	3.09	1.41	3.78	0.0203663	-1.36989	down
F01_cb3568_c11/f1p1/2818	324	193	193	74	90	43	6.69	4.17	4.96	2.5	2.41	1.16	0.0461061	-1.22642	down
F01_cb3568_c13/f1p0/2572	95	43	61	0	0	14	2.17	1.03	1.75	0	0	0.42	0.000168904	-3.50186	down
F01_cb3603_c18/f1p0/2384	62	40	47	0	0	0	1.53	1.03	1.44	0	0	0	3.28176e-08	#NAME?	down
F01_cb3666_c35/f1p0/2482	5	8	0	28	213	169	0.13	0.22	0	1.11	6.6	5.28	0.023049	5.50993	up
F01_cb3688_c16/f1p0/2866	88	91	35	0	0	0	1.75	1.9	0.88	0	0	0	1.91833e-09	#NAME?	down
F01_cb3738_c57/f1p0/2682	217	104	61	194	252	272	4.84	2.42	1.69	7.05	7.25	7.92	0.0105604	1.4555	up
F01_cb3738_c83/f48p5/2620	749	610	621	49	140	43	16.38	13.96	16.88	1.77	3.96	1.25	5.08799e-09	-2.55615	down
F01_cb3740_c9/f1p1/1714	83	53	30	8	0	0	2.96	2	1.34	0.49	0	0	8.14572e-05	-3.74693	down
F01_cb3775_c3/f1p0/2123	22	73	9	76	92	134	0.62	2.13	0.34	3.44	3.3	4.84	0.00131329	2.01586	up
F01_cb3856_c23/f1p0/2533	457	410	417	31	0	0	10.32	9.7	11.71	1.17	0	0	1.19883e-23	-4.79297	down
F01_cb3867_c4/f1p0/2687	99	78	68	9	0	0	2.12	1.74	1.81	0.34	0	0	2.74484e-07	-4.17146	down
F01_cb3879_c8/f1p1/2191	177	364	229	0	0	0	4.72	10.12	7.57	0	0	0	2.74671e-13	#NAME?	down
F01_cb3879_c9/f1p0/2206	83	90	90	9	8	7	2.22	2.5	2.98	0.42	0.28	0.26	0.000105662	-2.95971	down
F01_cb3883_c16/f1p1/2378	78	65	71	0	1	0	1.9	1.68	2.16	0	0.05	0	3.81476e-10	-7.16265	down
F01_cb3883_c18/f1p0/3006	1144	708	999	359	175	251	24.17	15.66	26.23	12.36	4.78	6.91	0.0359485	-1.36068	down
F01_cb3883_c21/f1p1/2791	1612	846	1454	189	74	167	33.59	18.45	37.63	6.42	1.99	4.53	6.97917e-06	-2.70544	down
F01_cb3883_c23/f1p1/2723	865	612	643	22	0	0	18.3	13.55	16.9	0.78	0	0	1.45773e-32	-5.99876	down
F01_cb3883_c5/f2p0/3080	489	213	402	95	59	67	8.95	4.09	9.15	2.85	1.4	1.6	0.0189627	-1.81141	down
F01_cb3926_c13/f1p0/616	132	236	175	4	10	14	19.07	35.82	31.55	1.03	1.89	2.69	1.30699e-07	-3.84829	down
F01_cb3947_c24/f1p0/2336	6	30	17	49	45	73	0.15	0.8	0.54	2.01	1.44	2.37	0.0129815	2.08089	up
F01_cb3947_c42/f1p0/2209	78	36	97	0	8	0	2.22	1.08	3.41	0	0.31	0	0.00253467	-4.16226	down
F01_cb4000_c12/f1p0/1952	11	18	11	112	151	50	0.36	0.6	0.44	5.62	5.95	2	0.0212892	3.50082	up
F01_cb4050_c0/f1p1/3047	1214	5983	554	3	0	0	22.39	115.42	12.69	0.09	0	0	0.0414124	-10.7481	down
F01_cb4081_c12/f1p0/1903	58	64	43	93	113	207	1.96	2.27	1.81	5.12	4.91	9.07	0.00297589	1.78097	up
F01_cb4105_c117/f1p0/2408	613	377	334	0	0	0	14.8	9.54	10.03	0	0	0	1.3795e-38	#NAME?	down
F01_cb4105_c123/f1p4/2691	58	0	13	284	257	255	1.23	0	0.36	9.83	7.05	7.06	7.65411e-18	4.08822	up
F01_cb4105_c59/f1p0/2643	251	131	145	0	6	12	5.81	3.19	4.19	0	0.19	0.38	6.59947e-13	-4.44171	down
F01_cb412_c56/f1p0/4211	613	518	605	120	41	72	7.93	7.01	9.73	2.53	0.69	1.22	6.57977e-08	-2.40229	down
F01_cb4169_c26/f1p0/2029	68	127	64	223	257	174	2	3.89	2.32	10.71	9.69	6.65	0.000999125	1.84389	up
F01_cb4169_c27/f1p0/1873	5	34	9	37	61	52	0.16	1.15	0.37	1.97	2.55	2.2	0.0208068	2.11313	up
F01_cb4169_c7/f2p1/1930	114	161	104	320	323	230	3.55	5.24	4.03	16.23	12.88	9.29	0.000765053	1.71403	up
F01_cb4211_c10/f1p1/2941	0	0	9	19	34	15	0	0	0.23	0.61	0.87	0.38	0.0276103	3.27833	up
F01_cb4228_c19/f5p0/2984	234	231	175	38	15	48	4.45	4.59	4.13	1.19	0.38	1.2	3.58519e-05	-2.19892	down
F01_cb4247_c4/f1p0/2965	150	154	53	345	356	257	2.89	3.09	1.27	10.79	8.81	6.44	0.000168093	1.97452	up
F01_cb4247_c5/f1p1/2567	231	143	96	324	426	371	5.17	3.36	2.68	11.84	12.29	10.82	0.000290504	1.79087	up
F01_cb4313_c107/f1p0/2511	31	53	23	6	0	0	0.72	1.28	0.65	0.24	0	0	0.00342046	-3.57042	down
F01_cb4349_c16/f1p0/2628	43	47	65	6	11	0	0.97	1.11	1.82	0.25	0.34	0	0.00783752	-2.63841	down
F01_cb4388_c25/f1p0/2342	183	204	91	28	51	17	4.92	5.75	3.05	1.23	1.78	0.61	0.0232174	-1.75532	down
F01_cb450_c13/f1p0/3461	381	294	309	100	117	69	6.22	5.02	6.25	2.65	2.46	1.48	0.0280238	-1.25846	down
F01_cb4568_c19/f1p1/1891	179	139	146	30	12	30	5.7	4.63	5.79	1.61	0.52	1.25	0.000254688	-2.21071	down
F01_cb4594_c3/f2p1/2449	424	397	390	39	4	31	10	9.8	11.44	1.52	0.15	0.98	6.78148e-15	-3.56297	down
F01_cb4594_c4/f2p1/2764	181	168	131	33	31	34	3.74	3.63	3.36	1.14	0.84	0.92	0.00415378	-1.7908	down
F01_cb4607_c8/f1p0/1747	0	0	0	51	42	29	0	0	0	2.8	1.8	1.29	9.62081e-11	Inf	up
F01_cb4730_c2/f5p0/1673	334	249	231	1	0	1	12.23	9.54	10.49	0.07	0	0.06	5.88646e-29	-8.20483	down
F01_cb4770_c11/f1p1/2391	82	63	90	14	8	12	2.01	1.61	2.72	0.56	0.27	0.38	0.00690256	-2.31205	down
F01_cb4803_c5/f1p0/1874	172	142	157	21	16	17	5.52	4.78	6.24	1.14	0.68	0.72	6.30034e-06	-2.62673	down
F01_cb4822_c3/f1p0/2994	5	0	6	34	21	37	0.09	0	0.14	1.07	0.52	0.93	0.000773551	3.51923	up
F01_cb485_c5/f1p0/3455	121	100	121	11	20	10	2.05	1.77	2.55	0.32	0.44	0.24	0.000150977	-2.54906	down
F01_cb4866_c11/f6p0/2631	179	95	147	27	0	8	3.91	2.17	3.98	0.98	0	0.25	9.70743e-07	-3.0599	down
F01_cb4888_c5/f2p1/2830	67	54	28	10	2	2	1.35	1.14	0.71	0.35	0.07	0.07	0.00535438	-2.83011	down
F01_cb4889_c9/f1p0/2305	96	109	91	0	0	1	2.42	2.9	2.87	0	0	0.06	2.4476e-13	-7.9083	down
F01_cb4902_c0/f1p0/2861	123	105	112	2	5	5	2.96	2.64	3.34	0.11	0.16	0.17	2.13741e-09	-4.35379	down
F01_cb4902_c1/f1p0/1788	87	74	64	11	8	7	2.95	2.63	2.7	0.63	0.38	0.34	0.00188962	-2.59163	down
F01_cb4911_c24/f1p0/1491	301	293	377	3	0	0	12.65	12.89	19.68	0.23	0	0	1.31937e-26	-7.77719	down
F01_cb4953_c15/f1p0/2605	0	0	0	323	295	112	0	0	0	11.74	8.47	3.24	1.52543e-09	Inf	up
F01_cb4956_c2/f1p0/2842	167	94	109	0	13	11	3.44	2.04	2.79	0	0.35	0.31	2.13896e-07	-3.46616	down
F01_cb4961_c6/f2p3/2020	205	351	81	0	0	0	6.06	10.87	2.99	0	0	0	1.20624e-05	#NAME?	down
F01_cb4981_c10/f1p0/1633	306	335	247	3	0	0	11.51	13.2	11.54	0.19	0	0	6.61349e-30	-7.62445	down
F01_cb5028_c2/f2p2/2228	60	53	79	14	3	12	1.58	1.47	2.58	0.64	0.11	0.44	0.0210669	-2.27696	down
F01_cb5030_c19/f1p0/1972	147	216	194	45	46	54	4.6	7.07	7.53	2.32	1.87	2.21	0.0250727	-1.47852	down
F01_cb5035_c4/f1p0/2056	387	257	223	21	78	43	11.93	8.29	8.56	1.07	3.13	1.73	1.05443e-05	-2.08271	down
F01_cb5139_c13/f1p0/1962	274	146	140	3	24	0	8.19	4.57	5.21	0.19	0.92	0	3.63991e-09	-3.76052	down
F01_cb5239_c7/f1p0/2757	178	118	92	207	261	255	3.7	2.56	2.38	6.97	6.97	6.87	0.0120774	1.41775	up
F01_cb5308_c19/f3p0/2607	416	341	330	95	124	79	9.16	7.85	9.02	3.42	3.51	2.28	0.0127602	-1.34809	down
F01_cb5339_c11/f1p0/2204	203	246	136	6	12	34	5.44	6.91	4.54	0.28	0.45	1.19	3.03866e-08	-3.07322	down
F01_cb5346_c3/f1p0/2497	120	103	95	23	0	0	2.77	2.51	2.74	0.87	0	0	2.77435e-06	-3.20214	down
F01_cb5355_c25/f6p2/2483	278	131	173	1	0	0	6.47	3.19	5.01	0.07	0	0	3.48275e-18	-8.58027	down
F01_cb5367_c18/f1p0/807	109	200	116	0	12	29	10.7	20.55	14.19	0	1.57	3.76	0.000904119	-2.99241	down
F01_cb5519_c0/f3p0/1897	176	139	163	29	18	21	5.57	4.61	6.41	1.52	0.77	0.9	7.22344e-05	-2.31457	down
F01_cb5582_c3/f1p0/2534	19	20	9	69	29	67	0.44	0.49	0.28	2.57	0.87	2.01	0.0114349	2.28442	up
F01_cb5740_c10/f1p0/2456	32	35	33	0	0	0	0.77	0.87	0.99	0	0	0	9.7135e-06	#NAME?	down
F01_cb5740_c3/f2p0/2466	112	100	106	0	0	0	2.64	2.46	3.1	0	0	0	2.72224e-15	#NAME?	down
F01_cb5740_c7/f1p0/2440	22	34	27	0	2	0	0.54	0.85	0.81	0	0.06	0	0.00171371	-4.81191	down
F01_cb5757_c49/f1p0/2431	725	546	483	81	203	141	18.1	14.27	14.98	3.31	6.54	4.6	0.00263343	-1.53402	down
F01_cb5765_c4/f1p0/2240	291	158	173	23	27	28	7.59	4.33	5.6	1.01	0.92	0.98	1.95238e-06	-2.48252	down
F01_cb597_c2/f2p1/3992	316	159	285	20	23	0	4.38	2.31	4.9	0.45	0.42	0	1.77769e-07	-3.56283	down
F01_cb6012_c0/f2p0/1361	19	63	16	72	84	101	0.91	3.09	0.98	5.58	5.07	6.16	0.00816169	1.86686	up
F01_cb6029_c11/f1p0/3350	413	268	303	63	53	101	6.87	4.67	6.26	1.71	1.14	2.19	0.000735556	-1.71004	down
F01_cb6029_c16/f1p0/3362	159	379	212	6	39	41	2.67	6.66	4.43	0.17	0.85	0.9	0.0353414	-2.6878	down
F01_cb6034_c35/f1p0/2600	239	160	198	25	16	0	5.61	3.92	5.76	0.99	0.49	0	4.65273e-10	-3.27866	down
F01_cb6034_c40/f1p0/2461	115	214	117	21	44	4	2.81	5.46	3.54	0.86	1.39	0.13	0.0374917	-2.13456	down
F01_cb6091_c6/f19p4/1820	768	1112	469	88	143	194	25.43	38.54	19.28	4.8	6.13	8.4	0.0292247	-1.99113	down
F01_cb6095_c0/f1p0/2655	70	52	60	0	5	9	1.52	1.17	1.63	0	0.14	0.25	0.000485906	-3.28845	down
F01_cb6095_c1/f1p0/2747	39	35	24	2	4	0	0.83	0.79	0.63	0.07	0.13	0	0.0083803	-3.43062	down
F01_cb6171_c7/f1p0/1632	38	40	51	3	1	1	1.47	1.62	2.46	0.19	0.05	0.05	0.000189115	-4.18306	down
F01_cb6355_c39/f1p0/2114	52	19	27	0	0	0	1.72	0.65	1.1	0	0	0	1.58391e-05	#NAME?	down
F01_cb6357_c14/f1p1/2188	620	491	459	122	108	119	16.5	13.69	15.2	5.32	3.71	4.16	0.000619516	-1.66667	down
F01_cb6378_c21/f3p1/2531	224	172	144	45	64	35	5.1	4.11	4.07	1.68	1.89	1.04	0.0377795	-1.37064	down
F01_cb644_c44/f1p0/1391	413	475	423	0	0	0	18.84	22.66	23.98	0	0	0	8.08476e-41	#NAME?	down
F01_cb644_c48/f1p0/1015	218	242	227	0	0	0	15.03	17.49	19.44	0	0	0	4.17813e-28	#NAME?	down
F01_cb644_c7/f2p0/1326	36	27	30	2	0	0	1.77	1.37	1.81	0.22	0	0	0.000576402	-4.95425	down
F01_cb6530_c4/f2p1/2534	94	43	71	20	13	0	2.15	1.03	2.01	0.77	0.38	0	0.0216152	-2.06348	down
F01_cb6550_c4/f1p0/2573	118	110	81	19	12	11	2.65	2.6	2.27	0.71	0.35	0.34	0.00104746	-2.35261	down
F01_cb6647_c80/f1p1/3974	65	110	87	195	154	254	0.9	1.61	1.51	4.4	2.77	4.61	0.000890142	1.65258	up
F01_cb6702_c1/f1p2/2622	1104	749	617	279	203	182	24.12	17.14	16.75	9.95	5.72	5.19	0.0200598	-1.35871	down
F01_cb6733_c3/f1p1/2192	90	56	79	0	0	0	2.41	1.57	2.65	0	0	0	1.29815e-11	#NAME?	down
F01_cb6787_c1/f2p1/2332	519	351	422	3	10	2	12.94	9.16	13.08	0.14	0.33	0.07	3.08841e-29	-5.87612	down
F01_cb6847_c1/f1p0/2527	118	50	66	4	12	19	2.7	1.2	1.87	0.15	0.37	0.56	0.0106792	-2.27267	down
F01_cb6874_c4/f4p1/1436	1750	1274	1565	152	187	211	76.82	58.58	85.41	11.05	10.62	12.16	1.66728e-06	-2.57966	down
F01_cb6941_c23/f1p0/2006	0	0	0	20	51	46	0	0.02	0	0.98	1.96	1.79	1.552e-08	Inf	up
F01_cb7067_c18/f2p0/1547	210	152	87	3	0	0	8.44	6.4	4.39	0.2	0	0	1.35638e-14	-6.60535	down
F01_cb7067_c27/f1p0/1571	504	454	415	0	0	0	20.35	19.23	20.84	0	0	0	1.7048e-41	#NAME?	down
F01_cb7067_c56/f1p0/1111	57	31	30	0	0	0	3.46	1.97	2.26	0	0	0	1.31501e-06	#NAME?	down
F01_cb712_c8/f1p1/1807	56	48	63	3	0	0	1.88	1.68	2.64	0.21	0	0	6.83527e-07	-5.23153	down
F01_cb7142_c2/f2p0/2483	71	78	37	6	6	2	1.66	1.92	1.08	0.24	0.18	0.06	0.000374889	-3.16392	down
F01_cb7143_c7/f1p0/2038	49	36	38	0	0	0	1.42	1.11	1.4	0	0	0	6.3681e-07	#NAME?	down
F01_cb7143_c9/f1p0/578	56	55	90	0	1	0	9.13	9.41	18.15	0	0.21	0	8.57528e-08	-7.10543	down
F01_cb7153_c1/f1p0/2696	178	221	116	7	8	2	3.76	4.86	3.03	0.26	0.23	0.07	1.26085e-12	-4.35722	down
F01_cb7158_c8/f1p1/2485	67	98	62	0	0	0	1.57	2.4	1.81	0	0	0	1.02436e-11	#NAME?	down
F01_cb7206_c39/f1p0/2242	496	346	295	3	0	0	12.93	9.45	9.56	0.16	0	0	1.47258e-34	-7.96227	down
F01_cb7215_c66/f1p0/1262	124	137	163	46	0	27	6.42	7.41	10.5	4.01	0	1.86	0.00376527	-2.07514	down
F01_cb7223_c18/f1p0/1901	450	490	498	0	0	0	14.12	16.1	19.42	0	0	0	2.86098e-42	#NAME?	down
F01_cb7246_c2/f1p0/1763	52	58	47	0	4	2	1.82	2.1	2.02	0	0.19	0.09	3.47716e-05	-4.21709	down
F01_cb7287_c16/f4p0/974	108	71	114	0	0	0	7.88	5.42	10.31	0	0	0	2.27026e-14	#NAME?	down
F01_cb7423_c4/f1p0/2306	195	169	174	7	0	2	4.93	4.47	5.46	0.32	0	0.09	1.23653e-16	-5.37781	down
F01_cb7589_c43/f1p0/1796	16	20	0	48	44	33	0.54	0.72	0	2.7	1.92	1.49	0.02121	2.37699	up
F01_cb7599_c27/f1p1/2157	543	589	660	72	75	147	14.79	16.8	22.33	3.25	2.64	5.23	3.46432e-06	-2.17587	down
F01_cb7698_c34/f1p3/1920	131	145	71	17	23	40	4.09	4.75	2.78	0.87	0.95	1.63	0.0492271	-1.6455	down
F01_cb7782_c10/f1p0/2551	451	347	369	2	9	14	10.29	8.3	10.45	0.1	0.26	0.44	6.71284e-24	-5.10699	down
F01_cb7789_c25/f1p0/1713	34	48	28	0	0	12	1.23	1.81	1.24	0	0	0.58	0.0432693	-2.88914	down
F01_cb793_c9/f1p0/3016	93	79	48	0	0	0	1.74	1.55	1.12	0	0	0	2.61875e-11	#NAME?	down
F01_cb7950_c0/f1p0/2357	83	63	120	0	0	0	2.05	1.64	3.68	0	0	0	6.08659e-09	#NAME?	down
F01_cb7950_c4/f1p0/2189	47	70	36	0	0	0	1.26	1.98	1.22	0	0	0	2.03325e-08	#NAME?	down
F01_cb7978_c4/f2p1/1834	218	271	204	11	14	22	7.18	9.31	8.34	0.59	0.59	0.94	4.21479e-11	-3.4276	down
F01_cb7997_c4/f1p0/1837	3	5	16	48	50	77	0.1	0.17	0.65	2.58	2.12	3.29	1.29285e-05	3.23825	up
F01_cb8023_c0/f1p0/2349	25	28	39	0	0	0	0.62	0.73	1.22	0	0	0	2.43649e-05	#NAME?	down
F01_cb8057_c40/f1p3/2164	300	336	183	27	41	78	8.17	9.59	6.18	1.22	1.44	2.79	5.29194e-05	-2.03103	down
F01_cb8079_c63/f1p0/1988	180	77	37	167	193	349	5.47	2.45	1.41	8.34	7.59	13.83	0.0127933	1.79802	up
F01_cb8087_c13/f1p0/2268	182	149	138	2	0	2	5.18	4.44	4.87	0.12	0	0.09	3.81216e-17	-6.41493	down
F01_cb8107_c10/f1p0/2594	1259	581	680	113	232	218	28.25	13.64	18.96	4.14	6.73	6.39	0.0182612	-1.65012	down
F01_cb8192_c17/f3p1/2321	661	601	320	146	81	0	16.56	15.77	9.98	5.98	2.63	0	0.000329615	-2.19108	down
F01_cb8245_c8/f1p0/2258	235	231	185	73	34	37	6.05	6.21	5.9	3.07	1.13	1.24	0.00241666	-1.65592	down
F01_cb8326_c18/f5p1/2231	313	255	137	48	43	82	8.21	6.99	4.48	2.06	1.48	2.8	0.00761769	-1.53512	down
F01_cb8347_c6/f1p0/1732	110	70	60	2	0	5	3.89	2.57	2.64	0.14	0	0.27	9.79445e-08	-4.6817	down
F01_cb8417_c16/f1p0/1745	90	167	29	0	0	0	3.25	6.35	1.33	0	0	0	0.00180757	#NAME?	down
F01_cb8432_c1/f2p0/2276	9	11	17	20	47	57	0.25	0.32	0.55	0.87	1.58	1.93	0.0272931	2.1629	up
F01_cb8438_c0/f1p0/2292	85	76	52	2	0	2	2.16	2.03	1.65	0.12	0	0.07	4.31523e-08	-5.266	down
F01_cb8438_c1/f1p0/2402	182	180	133	2	6	3	4.36	4.51	3.97	0.08	0.18	0.12	1.87852e-14	-4.97188	down
F01_cb8494_c18/f1p0/2006	2356	2212	2047	435	241	394	70.82	69.62	76.45	21.46	9.35	15.48	0.00200879	-2.14196	down
F01_cb8548_c8/f1p0/1900	91	75	48	22	16	0	2.86	2.49	1.89	1.16	0.69	0	0.0406198	-1.88609	down
F01_cb8640_c7/f1p0/2179	0	0	17	236	27	286	0	0.02	0.61	10.92	1	10.5	0.0170089	5.29377	up
F01_cb8703_c28/f1p1/1533	101	100	38	7	15	20	4.13	4.27	1.95	0.48	0.84	1.09	0.0389566	-2.01527	down
F01_cb8736_c11/f1p1/1789	202	98	90	23	24	0	6.84	3.47	3.81	1.3	1.06	0	0.00272945	-2.43035	down
F01_cb8826_c24/f1p0/907	101	56	60	0	12	0	8.04	4.7	6.01	0	1.23	0	1.54497e-05	-3.57136	down
F01_cb8831_c5/f1p0/1973	80	79	71	15	9	0	2.44	2.53	2.7	0.75	0.37	0	0.000732259	-2.68028	down
F01_cb8837_c1/f2p0/1480	135	163	90	11	16	48	5.74	7.26	4.77	0.78	0.91	2.68	0.00724459	-1.94829	down
F01_cb8837_c6/f1p0/1781	52	76	66	11	4	2	1.78	2.73	2.82	0.62	0.19	0.13	0.000612518	-2.9805	down
F01_cb8842_c14/f1p0/1769	0	0	15	18	28	38	0	0	0.66	1.02	1.26	1.7	0.0096253	2.78456	up
F01_cb9071_c16/f1p0/1449	158	220	79	24	4	14	8.36	12.19	5.21	2.12	0.32	1.03	0.00661536	-2.92731	down
F01_cb9123_c16/f1p0/1523	155	103	70	0	0	0	6.37	4.42	3.59	0	0	0	1.88043e-15	#NAME?	down
F01_cb9143_c2/f1p0/2055	682	88	337	3	0	0	19.62	2.67	12.06	0.14	0	0	0.000668385	-7.90004	down
F01_cb9147_c10/f1p0/2003	317	458	336	57	102	52	10.65	16.11	14.05	3.2	4.43	2.3	4.9374e-05	-1.88911	down
F01_cb9170_c1/f1p0/1954	107	113	98	12	24	33	3.41	3.76	3.9	0.64	1.01	1.39	0.0397	-1.75122	down
F01_cb9172_c7/f5p1/1413	1319	1193	906	0	0	13	59.09	55.97	50.45	0	0	0.82	1.86803e-38	-7.71989	down
F01_cb9339_c9/f2p0/2391	23	22	0	59	65	70	0.56	0.56	0	2.34	2.05	2.23	0.000505794	2.67541	up
F01_cb9350_c3/f1p0/2159	120	81	62	9	25	19	3.27	2.31	2.1	0.41	0.88	0.68	0.0489254	-1.79302	down
F01_cb9481_c4/f1p0/2088	292	132	114	0	5	0	8.25	3.91	4.01	0	0.19	0	5.70095e-08	-6.11997	down
F01_cb9516_c0/f1p0/2142	432	330	436	17	6	6	11.92	9.52	14.94	0.81	0.22	0.23	3.41926e-23	-4.84782	down
F01_cb9516_c3/f1p0/2111	136	138	90	6	9	12	3.8	4.03	3.13	0.27	0.35	0.45	9.41475e-07	-3.27416	down
F01_cb9543_c4/f1p1/1091	164	122	143	7	1	23	10.17	7.95	11.01	0.79	0.11	1.95	9.35529e-08	-3.40763	down
F01_cb9564_c2/f1p0/2121	78	65	65	12	15	6	2.35	2.05	2.43	0.62	0.6	0.25	0.0217475	-2.11823	down
F01_cb9564_c5/f1p1/806	31	23	23	0	0	0	3.03	2.36	2.75	0	0	0	0.000223541	#NAME?	down
F01_cb9609_c0/f5p0/1755	145	99	147	0	0	4	5.03	3.61	6.33	0	0	0.18	1.48782e-14	-6.31323	down
F01_cb9609_c13/f1p0/1669	130	41	59	160	289	354	4.79	1.57	2.71	9.71	13.69	16.95	0.000152728	2.31507	up
F01_cb9614_c9/f1p0/1839	150	296	239	17	52	22	4.93	10.17	9.74	0.97	2.2	0.95	0.00432414	-2.4222	down
F01_cb966_c51/f1p0/2178	0	19	38	80	64	59	0.02	0.54	1.29	3.53	2.23	2.1	0.00187336	2.22473	up
F01_cb968_c7/f1p1/3572	111	164	101	0	0	10	1.74	2.67	1.97	0	0	0.21	3.64144e-11	-4.93007	down
F01_cb9788_c113/f1p0/3290	578	213	487	17	33	14	9.78	3.77	10.23	0.47	0.72	0.31	8.50572e-05	-3.78967	down
F01_cb9788_c125/f1p0/2172	179	197	161	5	4	7	4.92	5.65	5.49	0.22	0.15	0.25	6.0469e-14	-4.60361	down
F01_cb9788_c74/f1p0/2643	266	373	161	41	70	58	5.78	8.46	4.35	1.47	1.96	1.65	0.0469087	-1.73642	down
F01_cb9859_c7/f1p0/1117	1468	821	824	67	110	133	97.26	57.03	67.9	7.57	9.44	11.64	1.7787e-09	-2.83111	down
F01_cb9959_c2/f1p0/1498	51	56	51	0	2	0	2.15	2.45	2.66	0	0.11	0	4.7029e-07	-5.73054	down
F02_cb10000_c2/f1p0/651	11	64	24	128	94	107	1.44	8.82	3.93	29.69	16.1	18.65	0.000169066	2.19996	up
F02_cb10002_c29/f1p0/2660	1	7	3	95	83	117	0.03	0.18	0.09	3.33	2.31	3.3	2.86902e-14	5.1852	up
F02_cb10002_c7/f1p0/2977	6	7	3	121	95	136	0.13	0.15	0.08	3.75	2.34	3.36	2.96294e-15	4.96412	up
F02_cb10021_c0/f2p0/2301	34	84	13	68	105	110	0.86	2.22	0.41	2.81	3.42	3.62	0.0301747	1.61007	up
F02_cb10060_c12/f2p1/1868	200	71	80	264	328	294	6.43	2.4	3.23	13.94	13.6	12.33	0.000108652	1.88212	up
F02_cb10089_c17/f4p1/2412	247	299	287	114	53	83	5.93	7.52	8.57	4.49	1.65	2.62	0.0468655	-1.25633	down
F02_cb10223_c0/f1p0/1979	76	56	21	113	93	111	2.3	1.78	0.81	5.62	3.63	4.41	0.029758	1.59501	up
F02_cb1028_c0/f7p0/2568	142	93	132	293	202	273	3.19	2.18	3.69	10.7	5.85	7.95	0.00237643	1.55185	up
F02_cb1028_c1/f9p1/2583	64	32	54	220	165	219	1.43	0.75	1.5	7.98	4.73	6.34	9.78243e-08	2.50088	up
F02_cb1028_c11/f1p0/1761	0	0	0	195	154	156	0	0	0	10.99	6.82	7	3.95622e-32	Inf	up
F02_cb10292_c11/f1p0/1863	0	0	0	26	215	85	0	0	0	1.37	8.93	3.58	0.015023	Inf	up
F02_cb10350_c14/f1p1/1927	146	188	150	1023	333	925	4.54	6.12	5.77	51.97	13.3	37.37	0.027584	2.70349	up
F02_cb10350_c20/f1p1/1842	48	0	79	120	179	192	1.59	0	3.26	6.55	7.64	8.29	9.56809e-07	2.38391	up
F02_cb10361_c9/f1p0/1846	0	11	0	63	33	30	0	0.39	0	3.43	1.41	1.3	0.00303809	4.02895	up
F02_cb10478_c33/f1p0/2200	6	16	0	30	26	44	0.18	0.46	0	1.31	0.91	1.55	0.0120272	2.68839	up
F02_cb10478_c37/f1p0/1754	6	4	4	25	25	43	0.21	0.17	0.19	1.42	1.13	1.94	0.00240401	3.20875	up
F02_cb10478_c42/f1p0/2625	6	9	12	66	85	97	0.13	0.21	0.33	2.35	2.39	2.78	3.47395e-08	3.63501	up
F02_cb10478_c43/f1p0/1473	2	1	1	20	30	62	0.09	0.04	0.05	1.44	1.7	3.48	4.01527e-05	5.27751	up
F02_cb10478_c45/f1p0/2630	7	4	3	26	37	31	0.17	0.11	0.1	0.98	1.08	0.93	0.0020367	3.28414	up
F02_cb10478_c46/f1p0/3200	0	0	0	95	132	138	0	0	0	2.72	3	3.16	2.87444e-25	Inf	up
F02_cb10478_c47/f1p0/2322	0	0	0	34	31	42	0	0	0	1.42	1.01	1.38	1.49548e-09	Inf	up
F02_cb10478_c61/f1p0/2121	0	0	0	17	28	18	0	0	0	0.78	1.01	0.67	5.95868e-06	Inf	up
F02_cb10536_c7/f1p2/1755	107	26	70	226	249	189	3.68	0.94	3.03	12.78	11.06	8.49	2.40298e-06	2.24135	up
F02_cb10589_c13/f1p0/1793	58	72	67	308	238	461	1.99	2.56	2.84	17.12	10.4	20.35	7.73059e-11	2.80031	up
F02_cb10589_c4/f1p0/1917	51	50	76	319	356	502	1.66	1.71	3.06	16.94	14.86	21.16	1.68417e-13	3.17277	up
F02_cb10598_c1/f1p0/1597	112	43	50	0	13	12	4.35	1.77	2.43	0	0.68	0.64	0.0388979	-2.53629	down
F02_cb10632_c10/f1p0/1749	0	1	1	51	31	58	0	0.04	0.04	2.91	1.39	2.62	4.13256e-10	6.51412	up
F02_cb10647_c11/f4p1/751	122	208	95	287	309	332	12.83	22.98	12.48	52.25	42.25	46.14	0.00112147	1.61795	up
F02_cb10647_c31/f1p0/648	95	448	341	709	722	566	12.38	61.06	55.24	162.23	122.24	97.51	0.00294087	1.63062	up
F02_cb1069_c0/f1p1/3995	0	0	0	96	54	95	0	0	0	2.15	0.96	1.71	2.19764e-18	Inf	up
F02_cb10808_c5/f2p1/1587	115	64	103	343	255	370	4.49	2.61	5.02	22.05	12.83	18.81	3.67487e-07	2.26128	up
F02_cb10832_c2/f5p0/1823	0	0	23	1815	2625	2231	0	0	0.94	98.5	111.85	96.15	1.52041e-28	8.51098	up
F02_cb10861_c20/f1p0/1130	320	196	184	23	60	63	19.03	12.21	13.65	2.37	4.68	4.98	0.000976864	-1.76743	down
F02_cb10992_c0/f1p0/1860	0	0	0	16	18	22	0	0	0	0.89	0.77	0.97	2.97216e-05	Inf	up
F02_cb10992_c1/f1p0/1622	3	0	0	28	43	63	0.12	0	0.05	1.81	2.15	3.14	4.5349e-09	6.1093	up
F02_cb11018_c20/f1p0/2922	26	26	0	48	47	52	0.51	0.54	0	1.54	1.18	1.31	0.0428559	2.0665	up
F02_cb11041_c10214/f1p1/2803	0	0	0	46	20	218	0	0	0	1.53	0.54	5.78	0.0491724	Inf	up
F02_cb11041_c103234/f2p3/2636	0	0	0	139	64	99	0	0	0	4.94	1.8	2.82	6.49456e-12	Inf	up
F02_cb11041_c104058/f1p28/4606	0	0	0	914	2709	1030	0	0	0	17.58	41.4	15.9	8.07755e-08	Inf	up
F02_cb11041_c104238/f1p8/1757	15	6	5	185	195	125	0.55	0.23	0.21	10.53	8.71	5.66	7.14035e-12	4.85559	up
F02_cb11041_c104270/f2p16/3764	0	0	0	32	19	16	0	0	0	0.78	0.37	0.32	2.45424e-06	Inf	up
F02_cb11041_c104921/f40p6/3575	0	0	0	328	1226	588	0	0	0	8.29	24.58	11.91	6.21905e-07	Inf	up
F02_cb11041_c105207/f4p2/1890	157	295	280	360	514	580	4.98	9.79	11.04	18.72	21.03	23.98	0.00712424	1.43233	up
F02_cb11041_c105457/f1p12/2926	12	178	26	772	404	364	0.24	3.62	0.63	24.34	10.09	9.19	0.0119107	3.33512	up
F02_cb11041_c10762/f1p0/2422	0	0	0	21	36	125	0	0	0	0.82	1.11	3.92	0.00504496	Inf	up
F02_cb11041_c1130/f2p3/1552	29	12	0	37	42	47	1.16	0.53	0	2.47	2.18	2.46	0.0430129	2.21941	up
F02_cb11041_c1134/f1p0/2149	7	13	7	127	106	155	0.21	0.39	0.24	5.68	3.75	5.55	7.11317e-14	4.31459	up
F02_cb11041_c11361/f1p2/2084	0	0	1	132	23	72	0	0	0.04	6.14	0.84	2.68	0.00440495	8.16222	up
F02_cb11041_c115258/f2p2/2028	267	552	227	941	669	612	7.9	17.09	8.34	45.63	25.56	23.63	0.039116	1.59583	up
F02_cb11041_c12038/f1p0/3894	0	1	0	80	118	396	0	0.02	0	1.94	2.27	7.65	0.000353599	9.60869	up
F02_cb11041_c12077/f1p3/3068	0	0	0	2905	680	33	0	0	0	86.81	16.12	0.8	0.0318616	Inf	up
F02_cb11041_c12595/f1p0/3232	0	0	0	67	24	118	0	0	0	1.91	0.54	2.67	6.45462e-06	Inf	up
F02_cb11041_c1260/f1p0/2890	3	2	0	167	107	213	0.06	0.04	0	5.33	2.7	5.44	1.11189e-25	7.16867	up
F02_cb11041_c12942/f1p4/3208	0	0	3	106	63	32	0	0	0.07	3.02	1.44	0.74	0.000480658	6.44295	up
F02_cb11041_c1301/f5p0/1868	0	0	0	71	46	80	0	0	0	3.74	1.9	3.35	1.64511e-15	Inf	up
F02_cb11041_c132044/f7p1/1764	0	0	0	1609	1789	1857	0	0	0	90.87	79.26	83.21	2.38755e-43	Inf	up
F02_cb11041_c132132/f2p0/3735	0	0	0	52	31	53	0	0	0	1.26	0.59	1.03	1.22478e-11	Inf	up
F02_cb11041_c13321/f1p0/2399	0	0	0	198	28	356	0	0	0	7.8	0.87	11.17	0.000186436	Inf	up
F02_cb11041_c134834/f1p0/2736	0	0	0	14	22	99	0	0	0	0.48	0.61	2.71	0.0432789	Inf	up
F02_cb11041_c135049/f1p0/2540	0	0	0	38	37	118	0	0	0	1.4	1.11	3.5	1.54297e-05	Inf	up
F02_cb11041_c135770/f1p0/1835	0	0	0	31	174	82	0	0	0	1.69	7.38	3.51	0.00209118	Inf	up
F02_cb11041_c1437/f1p0/3294	3	1	0	51	32	44	0.05	0.02	0	1.41	0.7	0.97	3.76278e-08	5.6034	up
F02_cb11041_c1449/f2p0/2363	8	0	2	24	20	20	0.22	0	0.08	0.97	0.65	0.65	0.0208068	3.27545	up
F02_cb11041_c14830/f1p0/2974	0	0	0	158	27	61	0	0	0	4.89	0.66	1.53	0.00973139	Inf	up
F02_cb11041_c15098/f1p0/3810	2	0	0	148	354	55	0.04	0.01	0	3.5	6.63	1.06	0.00729304	8.84755	up
F02_cb11041_c15237/f2p0/3031	0	0	0	33	34	87	0	0	0	1.02	0.83	2.13	9.29104e-08	Inf	up
F02_cb11041_c1543/f1p1/1868	12	0	12	22	27	52	0.39	0	0.49	1.18	1.13	2.18	0.017469	2.51262	up
F02_cb11041_c1572/f1p0/2594	104	109	97	306	209	441	2.32	2.53	2.68	11.06	5.97	12.7	4.6256e-06	2.08168	up
F02_cb11041_c15726/f1p0/3286	0	0	0	102	24	101	0	0	0	2.83	0.53	2.25	4.17281e-06	Inf	up
F02_cb11041_c1576/f1p0/2259	1	100	33	844	1108	2503	0.05	2.89	1.14	38.07	39.38	89.88	1.72126e-06	5.44046	up
F02_cb11041_c1580/f1p0/2210	0	0	0	38	49	61	0	0	0	1.65	1.67	2.12	1.94392e-12	Inf	up
F02_cb11041_c15821/f1p0/2851	0	1	1	110	105	16	0	0.02	0.02	3.58	2.71	0.42	0.00269573	7.32681	up
F02_cb11041_c1584/f1p0/1313	2	4	2	20	27	20	0.1	0.24	0.12	1.67	1.72	1.35	0.00574505	3.56248	up
F02_cb11041_c16022/f1p0/2195	0	0	0	137	16	139	0	0	0	5.98	0.55	4.83	0.000220127	Inf	up
F02_cb11041_c16382/f1p0/1289	0	0	1	41	36	63	0	0	0.07	3.42	2.34	4.17	7.43014e-11	7.42913	up
F02_cb11041_c16621/f1p0/2518	0	0	0	41	94	87	0	0	0	1.54	2.79	2.6	2.93411e-12	Inf	up
F02_cb11041_c16752/f1p6/2390	0	0	0	25	58	37	0	0	0	1.01	1.82	1.19	1.84064e-07	Inf	up
F02_cb11041_c17189/f1p1/3725	0	0	0	100	22	175	0	0	0	2.43	0.43	3.4	0.000106421	Inf	up
F02_cb11041_c17283/f1p1/4009	0	0	0	132	43	196	0	0	0	3.11	0.8	3.7	1.09403e-07	Inf	up
F02_cb11041_c1774/f1p0/3680	33	93	43	135	81	122	0.5	1.47	0.81	3.3	1.57	2.39	0.0335899	1.46998	up
F02_cb11041_c18120/f1p1/2848	1	0	1	2239	780	16	0.02	0	0.03	76.65	21.14	0.44	0.0259519	11.1409	up
F02_cb11041_c18845/f1p0/3095	0	0	0	97	35	50	0	0	0	2.87	0.83	1.18	1.33898e-05	Inf	up
F02_cb11041_c19009/f1p2/2617	0	0	3	434	1376	266	0	0	0.09	16.2	40.61	7.94	0.00285754	9.81922	up
F02_cb11041_c1950/f1p0/2324	0	0	0	39	49	36	0	0	0	1.61	1.6	1.18	7.43975e-11	Inf	up
F02_cb11041_c19879/f1p8/3279	0	0	0	22	36	21	0	0	0	0.63	0.81	0.48	2.29746e-07	Inf	up
F02_cb11041_c20175/f1p0/3014	0	1	0	74	17	65	0	0.02	0	2.28	0.42	1.59	0.000129294	7.74911	up
F02_cb11041_c20337/f1p0/2759	0	0	0	55	97	70	0	0	0	1.88	2.58	1.91	2.79605e-15	Inf	up
F02_cb11041_c20540/f1p0/2437	0	0	0	37	28	70	0	0	0	1.47	0.88	2.17	3.74653e-11	Inf	up
F02_cb11041_c20788/f1p0/3738	0	0	0	437	2142	121	0	0	0	10.52	40.93	2.34	0.0313402	Inf	up
F02_cb11041_c21081/f1p3/3359	0	0	0	110	40	178	0	0	0	3.01	0.88	3.89	1.6665e-07	Inf	up
F02_cb11041_c2115/f1p0/1396	0	0	0	69	61	62	0	0	0	5.18	3.62	3.68	2.83251e-15	Inf	up
F02_cb11041_c21298/f1p0/3729	0	0	0	15	30	123	0	0	0	0.36	0.57	2.38	0.0334752	Inf	up
F02_cb11041_c21372/f1p1/2031	0	0	0	17	43	18	0	0	0	0.81	1.61	0.68	0.00071386	Inf	up
F02_cb11041_c2242/f1p0/1601	3	1	2	30	22	33	0.12	0.04	0.1	1.93	1.09	1.66	0.000126073	4.32581	up
F02_cb11041_c2245/f1p1/3716	28	24	31	164	110	198	0.43	0.38	0.59	3.96	2.13	3.85	3.21533e-09	2.9663	up
F02_cb11041_c23523/f1p0/2946	0	0	0	45	101	26	0	0	0	1.41	2.52	0.66	0.00108691	Inf	up
F02_cb11041_c24451/f1p0/2890	0	0	0	143	20	69	0	0	0	4.57	0.52	1.77	0.00669534	Inf	up
F02_cb11041_c24976/f1p2/1975	0	0	0	53	111	93	0	0	0	2.66	4.34	3.66	4.38351e-14	Inf	up
F02_cb11041_c25480/f1p0/1366	0	1	3	66	72	342	0	0.05	0.19	5.11	4.34	20.91	0.0248843	7.17069	up
F02_cb11041_c25981/f1p1/1962	0	0	1	47	167	241	0	0	0.04	2.34	6.56	9.54	1.22382e-06	9.10762	up
F02_cb11041_c26006/f1p1/3761	0	0	0	254	29	73	0	0	0	6.08	0.56	1.41	0.0473942	Inf	up
F02_cb11041_c26098/f5p2/3745	0	0	0	21	66	17	0	0	0	0.52	1.27	0.34	0.0194139	Inf	up
F02_cb11041_c26236/f1p1/1785	0	0	0	51	197	105	0	0	0	2.84	8.61	4.64	4.20917e-05	Inf	up
F02_cb11041_c2631/f1p0/1533	0	0	0	267	326	416	0	0	0	17.91	17.12	22.05	3.89666e-46	Inf	up
F02_cb11041_c2667/f1p0/2109	230	316	197	0	53	0	6.42	9.22	6.82	0	1.91	0	7.38178e-08	-3.22884	down
F02_cb11041_c2670/f1p0/1819	204	138	116	380	456	692	6.89	4.87	4.86	21.08	19.84	30.42	1.0564e-06	2.22604	up
F02_cb11041_c2675/f1p0/1454	0	0	0	40	42	68	0	0	0	2.87	2.36	3.85	1.51308e-12	Inf	up
F02_cb11041_c2680/f1p0/2277	6	7	6	46	42	72	0.17	0.19	0.21	1.96	1.4	2.41	9.34471e-06	3.53018	up
F02_cb11041_c2681/f1p0/2496	37	4	0	88	92	151	0.85	0.1	0	3.32	2.75	4.55	2.77383e-09	3.62665	up
F02_cb11041_c2685/f1p0/3338	5	0	6	126	97	182	0.08	0	0.13	3.44	2.1	4	2.28036e-19	5.64464	up
F02_cb11041_c2688/f1p0/2295	38	42	46	126	118	211	0.97	1.13	1.47	5.23	3.88	6.96	5.12782e-06	2.29447	up
F02_cb11041_c2771/f1p2/1896	14	0	15	71	231	306	0.46	0	0.61	3.71	9.46	12.66	0.000380344	4.82669	up
F02_cb11041_c2889/f1p0/2329	1	10	10	128	112	191	0.03	0.28	0.33	5.24	3.62	6.22	5.33281e-17	4.74753	up
F02_cb11041_c2891/f1p0/1507	9	2	1	55	39	68	0.41	0.11	0.06	3.81	2.13	3.72	2.43687e-07	4.33507	up
F02_cb11041_c2898/f1p0/2095	6	12	4	19	41	54	0.17	0.36	0.14	0.9	1.5	2	0.00292691	2.83781	up
F02_cb11041_c2901/f1p0/2623	35	24	64	105	73	91	0.78	0.57	1.76	3.76	2.06	2.59	0.03262	1.57702	up
F02_cb11041_c3008/f1p0/2509	0	0	0	57	72	92	0	0	0	2.52	2.51	3.23	6.02406e-17	Inf	up
F02_cb11041_c3113/f1p3/2018	1	11	10	79	138	123	0.04	0.36	0.38	3.82	5.26	4.73	4.77977e-13	4.36313	up
F02_cb11041_c3184/f1p0/2574	31	26	28	232	150	314	0.7	0.61	0.78	8.5	4.34	9.19	1.03436e-11	3.4955	up
F02_cb11041_c3195/f1p0/2658	43	15	6	42	56	103	0.93	0.35	0.17	1.5	1.58	2.89	0.0165409	2.18986	up
F02_cb11041_c3204/f1p0/1982	3	5	4	258	221	243	0.1	0.18	0.17	13.44	9.02	10.05	1.36814e-30	6.38369	up
F02_cb11041_c3307/f1p1/3468	4	0	0	119	87	205	0.07	0	0	3.13	1.82	4.29	2.11585e-15	7.30341	up
F02_cb11041_c3308/f1p1/2825	0	4	0	31	27	35	0	0.08	0	1.04	0.71	0.93	6.83174e-06	5.01359	up
F02_cb11041_c3311/f1p0/2724	0	0	0	18	20	19	0	0	0	0.61	0.55	0.53	2.2642e-05	Inf	up
F02_cb11041_c3313/f1p0/1307	0	0	0	98	149	184	0	0	0	8.1	9.51	11.92	1.69796e-28	Inf	up
F02_cb11041_c3315/f1p0/1938	0	0	0	32	25	43	0	0	0	1.65	1.01	1.76	5.41236e-09	Inf	up
F02_cb11041_c3316/f1p0/1962	0	0	0	235	247	258	0	0	0	11.72	9.69	10.2	1.04142e-40	Inf	up
F02_cb11041_c3317/f1p1/2984	0	0	0	84	116	138	0	0	0	2.58	2.8	3.39	8.91066e-24	Inf	up
F02_cb11041_c3393/f1p0/2734	0	0	0	123	174	310	0	0	0	4.28	4.8	8.62	1.34105e-17	Inf	up
F02_cb11041_c3517/f1p0/2698	0	2	3	122	110	127	0	0.04	0.08	4.22	3.01	3.51	1.92565e-20	6.55158	up
F02_cb11041_c3646/f1p0/1605	6	2	2	94	63	116	0.23	0.1	0.11	5.98	3.13	5.84	1.65148e-13	5.30232	up
F02_cb11041_c3647/f1p0/2174	0	0	0	123	94	91	0	0	0	5.35	3.23	3.19	3.04067e-22	Inf	up
F02_cb11041_c37067/f5p0/2068	0	0	1	199	191	302	0	0	0.04	9.33	7.04	11.24	7.70668e-38	9.73815	up
F02_cb11041_c37345/f2p7/2623	0	0	0	41	678	506	0	0	0	1.48	19.08	14.4	0.000228138	Inf	up
F02_cb11041_c3748/f4p0/2813	48	241	77	845	496	501	0.98	5.12	1.95	27.83	12.94	13.2	0.00139849	2.82135	up
F02_cb11041_c3755/f1p0/1684	66	137	48	538	460	315	2.43	5.27	2.19	32.4	21.71	15.02	4.10531e-05	2.9108	up
F02_cb11041_c3762/f1p0/2526	10	64	5	147	153	74	0.23	1.53	0.17	5.5	4.52	2.2	0.0159673	2.77563	up
F02_cb11041_c37622/f3p5/1803	43	70	159	5143	6233	6351	1.45	2.47	6.65	282.78	269.06	277.3	5.7174e-07	6.43819	up
F02_cb11041_c37626/f2p0/2363	42	125	24	0	0	0	1.05	3.23	0.76	0	0	0	0.0285959	#NAME?	down
F02_cb11041_c3764/f1p0/1474	57	215	80	384	287	267	2.42	9.57	4.23	27.02	15.76	14.84	0.00393367	1.90305	up
F02_cb11041_c3765/f1p0/1468	2	1	2	625	152	299	0.09	0.04	0.11	44.07	8.4	16.69	0.000389288	8.25236	up
F02_cb11041_c37788/f3p0/2052	120	113	91	306	313	225	3.47	3.42	3.29	14.47	11.64	8.45	7.24808e-05	1.90142	up
F02_cb11041_c37899/f4p0/1317	134	154	99	293	298	283	6.59	7.9	6.06	23.82	18.85	18.09	0.000691415	1.68039	up
F02_cb11041_c37982/f1p1/3697	27	15	21	62	37	68	0.42	0.24	0.4	1.51	0.72	1.34	0.0427575	1.89049	up
F02_cb11041_c38042/f6p0/2536	0	3	2	59	36	21	0	0.07	0.06	2.18	1.05	0.63	0.00184637	4.99809	up
F02_cb11041_c3820/f1p0/2866	6	1	6	33	23	35	0.12	0.02	0.15	1.06	0.59	0.9	0.0020367	3.28199	up
F02_cb11041_c3840/f1p0/1332	0	0	0	17	18	39	0	0	0	1.39	1.17	2.5	7.96053e-07	Inf	up
F02_cb11041_c38613/f1p0/2070	11	21	23	320	344	578	0.33	0.64	0.84	15.1	12.79	21.74	8.59406e-26	4.91324	up
F02_cb11041_c3867/f1p0/2652	55	45	0	137	107	163	1.2	1.04	0	4.83	3.01	4.59	2.44662e-06	2.58876	up
F02_cb11041_c3879/f1p0/2741	6	0	10	70	85	95	0.14	0	0.27	2.39	2.29	2.57	1.48878e-10	4.40083	up
F02_cb11041_c39205/f1p4/2924	0	0	0	82	121	74	0	0	0	2.62	3.06	1.9	1.47319e-15	Inf	up
F02_cb11041_c3927/f1p3/2672	69	56	0	89	87	164	1.48	1.27	0	3.12	2.41	4.59	0.00430106	1.98546	up
F02_cb11041_c3985/f1p0/1553	0	0	1	148	155	179	0	0	0.05	9.76	7.99	9.34	1.27797e-29	9.23393	up
F02_cb11041_c3987/f1p0/2126	34	38	56	455	396	569	0.97	1.1	1.95	20.64	14.13	20.53	8.39579e-19	3.91312	up
F02_cb11041_c3988/f1p0/1776	14	18	30	488	443	652	0.49	0.64	1.29	27.35	19.5	29.02	1.19804e-27	5.09872	up
F02_cb11041_c3989/f1p0/1772	1	9	4	41	40	42	0.04	0.36	0.18	2.31	1.8	1.89	6.25709e-05	3.58468	up
F02_cb11041_c39919/f1p0/2640	81	64	73	165	123	197	1.87	1.55	2.11	6.18	3.65	5.89	0.00276369	1.62803	up
F02_cb11041_c3996/f1p0/4388	12	3	9	154	79	122	0.15	0.04	0.14	3.09	1.26	1.97	1.43829e-08	4.39314	up
F02_cb11041_c4029/f1p0/2142	43	80	81	114	109	176	1.26	2.4	2.89	5.36	4.03	6.59	0.0241769	1.39574	up
F02_cb11041_c40308/f2p3/2027	0	0	55	432	495	1522	0	0	2.03	20.66	18.64	57.94	0.000590959	5.72906	up
F02_cb11041_c40437/f1p3/3063	0	0	0	296	3328	749	0	0	0	8.88	79.09	17.99	0.0120581	Inf	up
F02_cb11041_c4108/f1p0/2377	81	10	40	132	343	300	1.98	0.28	1.22	5.26	10.79	9.54	0.00276369	3.09142	up
F02_cb11041_c41129/f2p0/2600	18	77	22	83	73	129	0.4	1.79	0.63	3.01	2.07	3.72	0.0100908	1.73351	up
F02_cb11041_c4121/f1p1/2470	0	0	0	149	229	412	0	0	0	5.72	6.9	12.55	6.66083e-16	Inf	up
F02_cb11041_c41324/f1p0/3842	0	1	0	112	25	47	0	0.02	0	2.81	0.5	0.95	0.0101796	8.03021	up
F02_cb11041_c4158/f1p0/2990	0	0	0	212	114	200	0	0	0	6.52	2.78	4.92	2.54425e-23	Inf	up
F02_cb11041_c41677/f1p0/2218	0	0	0	48	16	30	0	0	0	2.27	0.6	1.13	4.54638e-05	Inf	up
F02_cb11041_c41728/f1p9/2929	0	0	0	41	145	123	0	0	0	1.32	3.63	3.11	1.76607e-07	Inf	up
F02_cb11041_c41932/f1p0/1878	5	11	7	66	76	64	0.17	0.37	0.28	3.48	3.16	2.7	4.06548e-07	3.64182	up
F02_cb11041_c42134/f1p0/1399	38	13	12	65	49	75	1.73	0.63	0.73	4.93	2.92	4.49	0.01121	2.12622	up
F02_cb11041_c43171/f1p0/1929	1	6	5	116	62	172	0.04	0.21	0.22	5.93	2.48	6.97	5.83458e-09	5.25652	up
F02_cb11041_c43222/f1p0/2333	18	19	20	273	191	293	0.47	0.52	0.63	11.12	6.14	9.53	3.63484e-19	4.19876	up
F02_cb11041_c4327/f1p1/1773	0	0	0	41	27	21	0	0	0	2.3	1.22	0.95	4.62369e-08	Inf	up
F02_cb11041_c43500/f1p0/2749	4	8	3	95	77	157	0.08	0.17	0.08	3.18	2.04	4.21	1.88142e-14	4.91452	up
F02_cb11041_c43561/f1p0/3751	0	0	0	259	391	740	0	0	0	6.96	8.32	15.9	2.25289e-16	Inf	up
F02_cb11041_c4390/f10p2/2696	0	0	0	25	23	26	0	0	0	0.9	0.63	0.72	6.6993e-07	Inf	up
F02_cb11041_c44045/f2p1/2309	27	8	19	127	119	180	0.71	0.22	0.63	5.31	3.93	5.98	8.35102e-11	3.46885	up
F02_cb11041_c4436/f1p1/2442	2	112	76	495	456	314	0.06	2.8	2.26	19.21	13.98	9.72	6.34632e-07	3.18125	up
F02_cb11041_c4438/f1p2/1986	21	169	60	743	513	491	0.65	5.32	2.27	36.64	19.91	19.26	3.03598e-07	3.27984	up
F02_cb11041_c447/f4p0/2449	0	0	1	190	114	216	0	0	0.03	7.32	3.48	6.66	1.15189e-28	9.33163	up
F02_cb11041_c4483/f1p0/2697	2	13	10	126	113	154	0.04	0.29	0.27	4.35	3.1	4.26	1.55249e-14	4.39386	up
F02_cb11041_c44990/f1p0/2881	1	1	0	1004	1370	31	0.02	0.04	0	32.19	34.75	0.8	0.000633979	10.8873	up
F02_cb11041_c45088/f1p0/1485	155	33	103	252	275	162	6.61	1.47	5.46	17.82	15.13	9.04	0.0468803	1.78756	up
F02_cb11041_c4532/f1p0/4583	1	0	8	371	158	379	0.02	0	0.13	7.41	2.51	6.07	1.5345e-12	6.99888	up
F02_cb11041_c4542/f1p1/3801	2	7	8	77	58	103	0.03	0.12	0.16	1.83	1.1	1.96	1.02066e-09	4.21067	up
F02_cb11041_c4544/f4p1/3645	0	0	0	144	137	141	0	0	0	3.58	2.7	2.81	3.3616e-28	Inf	up
F02_cb11041_c4550/f1p0/2114	28	39	25	153	79	143	0.79	1.16	0.88	6.95	2.84	5.17	3.88042e-05	2.50726	up
F02_cb11041_c45576/f1p1/2505	256	131	148	29	56	16	5.9	3.15	4.24	1.09	1.66	0.48	0.00270619	-1.83771	down
F02_cb11041_c4565/f1p1/2748	3	5	7	185	298	447	0.06	0.11	0.2	6.26	7.98	12.08	4.38072e-16	6.35843	up
F02_cb11041_c4567/f1p0/3751	58	24	11	595	496	892	0.85	0.38	0.22	14.22	9.41	17.09	5.80067e-25	4.95733	up
F02_cb11041_c4571/f1p0/3675	0	0	0	20	21	42	0	0	0	0.52	0.43	0.88	1.35187e-07	Inf	up
F02_cb11041_c4609/f1p0/4631	418	426	199	1234	990	1637	5.25	5.61	3.1	25.12	16.02	26.75	4.95367e-05	2.38668	up
F02_cb11041_c46244/f1p0/2202	1	1	9	45	76	82	0.03	0.04	0.3	1.95	2.62	2.85	1.07671e-09	4.55915	up
F02_cb11041_c4625/f1p0/3435	1	7	6	671	471	918	0.02	0.12	0.12	17.53	9.77	19.23	1.3795e-38	7.60001	up
F02_cb11041_c4633/f2p0/1862	37	94	65	116	95	196	1.22	3.17	2.62	6.18	3.95	8.25	0.012024	1.47794	up
F02_cb11041_c4642/f1p0/1704	0	0	0	28	18	62	0	0	0	1.67	0.85	2.89	6.03638e-06	Inf	up
F02_cb11041_c46488/f1p0/3030	0	0	0	115	101	140	0	0	0	3.48	2.42	3.39	9.0377e-25	Inf	up
F02_cb11041_c46607/f1p0/2985	11	25	18	71	112	117	0.21	0.5	0.43	2.19	2.75	2.89	8.69226e-07	2.92465	up
F02_cb11041_c46673/f1p1/2666	0	0	0	76	199	591	0	0	0	2.66	5.52	16.52	0.000314732	Inf	up
F02_cb11041_c47317/f1p0/2274	2	4	1	80	76	90	0.05	0.11	0.03	3.46	2.59	3.1	2.07422e-13	5.63742	up
F02_cb11041_c47337/f1p0/1961	12	10	0	44	34	39	0.39	0.34	0	2.22	1.35	1.55	0.00211074	2.99183	up
F02_cb11041_c4741/f1p0/2278	0	0	0	223	106	403	0	0	0	9.32	3.51	13.43	3.67746e-10	Inf	up
F02_cb11041_c4745/f1p0/2717	241	359	293	49	65	102	5.3	8.25	7.99	1.75	1.86	2.93	0.00300745	-1.60727	down
F02_cb11041_c4750/f1p0/2091	95	0	30	259	293	402	2.75	0	1.1	12.29	10.93	15.16	1.0163e-14	3.48605	up
F02_cb11041_c47547/f1p1/2587	4	4	8	59	36	61	0.09	0.09	0.22	2.15	1.03	1.76	3.72861e-06	3.71694	up
F02_cb11041_c4772/f1p0/2794	14	12	4	35	22	47	0.29	0.26	0.1	1.18	0.58	1.26	0.0429603	2.30561	up
F02_cb11041_c4821/f1p1/1509	1	2	8	102	47	103	0.04	0.09	0.41	6.98	2.51	5.58	6.12162e-09	4.88373	up
F02_cb11041_c48234/f1p0/2882	0	0	0	23	29	28	0	0	0	0.81	0.8	0.78	2.04579e-07	Inf	up
F02_cb11041_c4851/f1p0/1789	4	7	3	242	309	404	0.14	0.25	0.13	13.43	13.46	17.83	1.35525e-34	6.56702	up
F02_cb11041_c48529/f1p0/2417	24	4	0	85	70	63	0.6	0.11	0	3.34	2.16	1.97	8.23497e-07	3.61067	up
F02_cb11041_c48634/f1p6/3075	0	26	20	1687	1142	1330	0	0.52	0.47	52.17	27.96	32.92	6.61349e-30	6.9187	up
F02_cb11041_c4868/f1p0/1299	0	1	2	232	77	94	0	0.05	0.12	19.22	4.97	6.13	0.00064986	7.47714	up
F02_cb11041_c4877/f3p0/2799	23	29	29	284	277	408	0.47	0.62	0.73	9.4	7.25	10.8	2.64015e-19	4.0323	up
F02_cb11041_c49090/f1p1/2417	3	8	6	382	280	451	0.08	0.2	0.18	14.67	8.5	13.84	1.55398e-35	6.47183	up
F02_cb11041_c49581/f1p1/2782	0	10	3	2254	202	3064	0	0.24	0.09	84.3	5.97	91.51	0.000125854	9.11865	up
F02_cb11041_c49607/f1p6/2914	0	0	0	165	153	116	0	0	0	5.25	3.88	2.97	2.81217e-26	Inf	up
F02_cb11041_c49630/f1p0/2223	0	2	0	400	187	98	0	0.08	0	18.86	6.95	3.7	0.00025655	8.95571	up
F02_cb11041_c5018/f1p0/2310	0	54	20	49	71	121	0	1.44	0.65	2.05	2.32	4	0.024789	2.10023	up
F02_cb11041_c50613/f1p0/2565	0	0	0	94	42	133	0	0	0	3.04	1.08	3.44	1.03296e-10	Inf	up
F02_cb11041_c50802/f1p0/2206	134	163	144	725	851	1066	3.58	4.59	4.79	31.73	29.38	37.2	2.7372e-10	3.04776	up
F02_cb11041_c51622/f1p0/3919	0	0	0	848	75	186	0	0	0	20	1.41	3.53	0.0469452	Inf	up
F02_cb11041_c5281/f1p0/3013	0	1	0	14	26	21	0	0.03	0	0.44	0.64	0.52	6.12985e-05	6.41365	up
F02_cb11041_c52907/f2p1/3704	0	10	5	23517	8777	1122	0	0.16	0.1	574.25	170.1	21.97	0.00345467	11.6316	up
F02_cb11041_c52927/f1p0/2278	80	87	86	163	103	189	2.16	2.45	2.9	7.17	3.58	6.64	0.039316	1.30846	up
F02_cb11041_c5299/f1p1/2887	0	10	11	106	72	103	0	0.22	0.29	3.43	1.83	2.66	8.67997e-11	4.1361	up
F02_cb11041_c53154/f1p1/3494	3	3	0	320	392	608	0.05	0.05	0	8.15	7.92	12.42	8.12584e-40	8.31979	up
F02_cb11041_c53446/f2p0/1848	0	3	0	24	26	43	0	0.1	0	1.32	1.09	1.84	2.57801e-06	5.40535	up
F02_cb11041_c53644/f1p1/2019	0	0	0	49	159	750	0	0	0	2.37	6.02	28.7	0.0217078	Inf	up
F02_cb11041_c53723/f1p0/2609	0	0	0	69	58	100	0	0	0	2.47	1.64	2.86	2.85327e-17	Inf	up
F02_cb11041_c53868/f1p0/2266	7	5	1	63	32	44	0.18	0.15	0.06	2.66	1.07	1.49	1.22533e-05	3.98931	up
F02_cb11041_c54196/f1p0/3017	0	0	0	142	419	1779	0	0	0	4.32	10.08	43.24	0.00331815	Inf	up
F02_cb11041_c54595/f2p13/3093	0	0	0	39	60	50	0	0	0	1.17	1.42	1.19	1.50405e-12	Inf	up
F02_cb11041_c54686/f1p0/2102	530	481	338	730	1215	874	14.85	14.13	11.8	33.53	43.92	31.95	0.022269	1.58081	up
F02_cb11041_c54808/f1p0/2616	4	3	0	23	42	22	0.1	0.09	0	0.83	1.2	0.65	0.000499239	4.24229	up
F02_cb11041_c54981/f1p0/2651	0	1	0	118	180	128	0	0.03	0	4.14	5	3.6	2.61395e-21	9.22927	up
F02_cb11041_c55451/f1p1/1893	20	4	17	25	43	76	0.68	0.16	0.72	1.36	1.83	3.27	0.0363305	2.26011	up
F02_cb11041_c55492/f1p0/2907	0	0	0	108	259	91	0	0	0	3.77	7.15	2.56	1.0954e-05	Inf	up
F02_cb11041_c55828/f2p1/2033	2	7	11	46	23	41	0.08	0.24	0.42	2.25	0.9	1.59	0.00241666	2.86372	up
F02_cb11041_c55916/f1p0/3012	29	76	27	92	71	124	0.56	1.5	0.63	2.83	1.73	3.03	0.0272698	1.58356	up
F02_cb11041_c56/f5p0/2872	32	24	8	1197	1574	1154	0.64	0.51	0.2	38.51	40.07	29.71	1.01252e-27	6.50005	up
F02_cb11041_c56205/f1p0/2838	0	16	10	40	25	78	0	0.35	0.27	1.33	0.65	2.06	0.0116377	2.82634	up
F02_cb11041_c56570/f2p0/1985	80	56	29	149	109	122	2.44	1.78	1.12	7.41	4.28	4.85	0.00511606	1.74673	up
F02_cb11041_c56615/f1p0/3336	3	1	2	185	124	202	0.05	0.02	0.04	4.98	2.65	4.36	1.13037e-26	6.91171	up
F02_cb11041_c56675/f1p1/3184	0	9	0	206	181	70	0	0.18	0	6.32	4.4	1.72	2.01404e-05	6.19918	up
F02_cb11041_c56817/f1p0/2764	10	0	2	106	47	69	0.22	0	0.07	3.62	1.29	1.9	2.96127e-05	4.81932	up
F02_cb11041_c57113/f1p0/3051	4	2	5	8417	3163	767	0.08	0.06	0.14	262.14	77.99	19.13	0.00316907	10.676	up
F02_cb11041_c57147/f1p1/1463	0	0	0	223	225	2660	0	0	0	15.89	12.51	149.23	0.0486385	Inf	up
F02_cb11041_c57888/f1p1/1636	9	30	7	340	316	208	0.36	1.21	0.36	21.04	15.34	10.23	7.43014e-11	4.74979	up
F02_cb11041_c58154/f1p0/3362	4	4	1	25	31	25	0.07	0.07	0.02	0.69	0.67	0.56	0.00128477	3.72023	up
F02_cb11041_c58167/f1p1/2464	0	0	0	45	54	28	0	0	0	1.7	1.62	0.84	3.98955e-10	Inf	up
F02_cb11041_c58328/f1p0/2381	0	0	0	194	22	61	0	0	0	9.44	0.85	2.36	0.0485492	Inf	up
F02_cb11041_c58338/f1p0/3735	0	0	0	290	64	99	0	0	0	7.13	1.26	1.96	0.00226853	Inf	up
F02_cb11041_c58493/f1p0/3146	0	0	0	656	901	83	0	0	0	21.15	22.99	2.14	2.85947e-05	Inf	up
F02_cb11041_c58548/f1p1/2876	0	0	2	11548	1952	438	0	0.01	0.07	390.45	52.22	11.84	0.0445302	13.1763	up
F02_cb11041_c624/f3p0/2130	20	20	4	119	105	151	0.56	0.6	0.14	5.39	3.74	5.47	1.88435e-10	3.62177	up
F02_cb11041_c65081/f1p9/1941	0	0	0	27	44	65	0	0	0	1.36	1.74	2.64	1.37353e-11	Inf	up
F02_cb11041_c720/f2p1/2381	0	0	0	34	33	52	0	0	0	1.37	1.05	1.66	2.03991e-10	Inf	up
F02_cb11041_c72380/f1p2/2048	0	0	1	67	20	41	0	0	0.04	3.19	0.78	1.55	0.000257958	7.3348	up
F02_cb11041_c72917/f3p2/2387	0	0	0	106	257	194	0	0	0	4.24	8.05	6.13	1.37083e-12	Inf	up
F02_cb11041_c7320/f1p0/2836	0	0	0	109	127	61	0	0	0	3.56	3.3	1.61	1.59287e-11	Inf	up
F02_cb11041_c73617/f7p0/1718	164	175	97	264	353	407	5.81	6.49	4.31	15.41	16.15	18.82	0.000340812	1.72783	up
F02_cb11041_c73822/f3p0/2579	0	0	0	227	79	167	0	0	0	8.25	2.27	4.86	1.58584e-09	Inf	up
F02_cb11041_c74193/f3p1/2030	0	1	0	297	250	300	0	0.03	0	14.21	9.4	11.43	7.67601e-42	10.2066	up
F02_cb11041_c74244/f2p0/2129	6	0	0	33	54	87	0.18	0	0	1.5	1.96	3.14	9.71466e-09	5.47798	up
F02_cb11041_c74281/f2p0/2431	42	33	45	65	86	173	1.02	0.84	1.35	2.55	2.63	5.37	0.0439132	1.8622	up
F02_cb11041_c74315/f2p0/2488	0	0	0	55	26	36	0	0	0	2.09	0.78	1.09	1.57329e-08	Inf	up
F02_cb11041_c74358/f2p0/1806	21	76	0	138	79	149	0.71	2.68	0	7.58	3.43	6.51	0.000841253	2.41894	up
F02_cb11041_c7447/f9p1/1876	0	0	6	599	1303	707	0	0	0.27	31.41	53.69	29.46	4.26556e-11	9.1119	up
F02_cb11041_c74834/f1p3/1421	164	55	94	1659	2055	1574	7.31	2.57	5.24	122.18	117.98	91.49	1.08026e-13	4.6136	up
F02_cb11041_c75312/f1p0/2478	0	3	0	34	56	43	0	0.08	0	1.45	1.84	1.45	4.47447e-09	5.95882	up
F02_cb11041_c75356/f1p0/1921	2	5	3	50	54	51	0.06	0.16	0.12	2.6	2.22	2.12	1.43955e-07	4.42602	up
F02_cb11041_c7555/f2p0/2096	89	89	84	201	235	355	2.52	2.63	2.96	9.27	8.55	13.02	5.34359e-06	2.05384	up
F02_cb11041_c75670/f1p0/2126	1	0	0	85	74	139	0.03	0	0	3.84	2.64	4.99	3.38213e-20	8.84841	up
F02_cb11041_c7572/f4p0/2690	0	20	3	416	285	498	0	0.44	0.08	14.39	7.8	13.77	3.49923e-34	6.14687	up
F02_cb11041_c7578/f2p1/2093	2	6	9	118	95	150	0.08	0.2	0.33	5.48	3.45	5.53	2.08069e-15	4.81574	up
F02_cb11041_c76510/f1p0/4765	84	123	103	210	142	204	0.96	1.48	1.47	3.9	2.1	3.05	0.0275083	1.31123	up
F02_cb11041_c77262/f1p0/1705	16	9	20	42	43	81	0.61	0.34	0.92	2.5	2	3.79	0.00422395	2.31475	up
F02_cb11041_c77522/f1p0/2056	13	49	5	2770	937	874	0.39	1.49	0.21	130.85	34.87	32.88	0.00614596	6.63949	up
F02_cb11041_c77524/f1p0/2121	0	3	3	628	125	239	0	0.1	0.14	30.94	4.86	9.36	0.00970194	7.80028	up
F02_cb11041_c77599/f1p0/1516	291	113	182	28	15	40	11.98	4.88	9.33	1.94	0.8	2.16	0.00508281	-2.34049	down
F02_cb11041_c77722/f1p0/2085	12	20	15	71	57	71	0.35	0.59	0.55	3.29	2.08	2.63	0.000494108	2.55264	up
F02_cb11041_c77732/f1p0/2116	66	54	45	114	80	129	1.83	1.58	1.58	5.2	2.89	4.68	0.0467673	1.46038	up
F02_cb11041_c77783/f1p0/2012	0	3	4	49	65	88	0	0.11	0.17	2.37	2.49	3.39	4.74661e-11	5.21883	up
F02_cb11041_c77919/f1p0/2005	0	0	0	31	28	38	0	0	0	1.5	1.07	1.47	9.02335e-09	Inf	up
F02_cb11041_c77948/f1p0/2290	8	2	3	18	17	31	0.21	0.05	0.1	0.75	0.56	1.03	0.0446297	2.86069	up
F02_cb11041_c78291/f1p0/1478	0	0	0	186	159	252	0	0	0	13.04	8.71	13.96	7.37073e-36	Inf	up
F02_cb11041_c78430/f1p0/2171	1	4	1	14	22	29	0.03	0.12	0.03	0.64	0.77	1.02	0.00285754	3.8938	up
F02_cb11041_c78716/f1p1/1652	4	0	3	35	40	38	0.16	0	0.17	2.18	1.96	1.86	4.09222e-06	4.52446	up
F02_cb11041_c79636/f1p0/1689	0	5	4	61	61	67	0	0.19	0.18	3.61	2.83	3.15	1.16823e-09	4.80176	up
F02_cb11041_c7967/f2p21/3782	0	0	0	46	101	49	0	0	0	1.11	1.92	0.95	8.26421e-07	Inf	up
F02_cb11041_c79742/f1p0/2023	39	80	69	8	2	0	1.15	2.46	2.51	0.4	0.09	0	0.000160136	-3.68527	down
F02_cb11041_c80032/f1p0/2088	0	0	4	32	69	65	0	0	0.19	1.73	2.92	2.81	9.77998e-10	5.69058	up
F02_cb11041_c80165/f1p0/1693	33	16	18	59	42	114	1.19	0.62	0.83	3.43	1.92	5.23	0.0199023	2.15435	up
F02_cb11041_c80610/f1p0/1677	8	0	5	276	108	83	0.32	0	0.27	16.56	5.09	3.99	0.0170089	5.73515	up
F02_cb11041_c80669/f1p0/2389	76	83	82	330	246	478	1.84	2.13	2.5	13.09	7.7	15.1	2.17136e-09	2.57995	up
F02_cb11041_c80885/f2p1/1955	29	0	11	279	291	539	0.91	0	0.45	13.98	11.44	21.44	3.12027e-18	5.31721	up
F02_cb11041_c810/f2p1/3042	0	0	4	401	278	520	0	0	0.09	12.11	6.65	12.55	7.32073e-43	8.53191	up
F02_cb11041_c813/f2p0/2267	3	4	10	138	187	98	0.08	0.11	0.32	5.81	6.21	3.29	3.39666e-08	5.08485	up
F02_cb11041_c81515/f1p0/1413	354	456	259	1306	969	1129	16.74	22.58	15.25	102.41	59.19	69.83	0.000220023	2.17367	up
F02_cb11041_c81926/f1p0/2503	0	0	0	48	49	72	0	0	0	1.8	1.45	2.15	8.81384e-14	Inf	up
F02_cb11041_c820/f2p0/1688	0	0	0	40	44	112	0	0	0	2.4	2.08	5.29	8.42523e-08	Inf	up
F02_cb11041_c82103/f1p0/2648	0	4	1	120	141	174	0	0.09	0.03	4.27	3.97	4.93	5.47837e-24	6.87869	up
F02_cb11041_c82558/f1p0/1771	41	20	16	215	180	210	1.47	0.77	0.71	12.57	8.26	9.71	3.55833e-13	3.51315	up
F02_cb11041_c82629/f1p0/1576	0	0	0	192	193	359	0	0	0	12.43	9.78	18.4	4.61497e-31	Inf	up
F02_cb11041_c82805/f1p0/3038	0	0	0	152	104	153	0	0	0	4.58	2.48	3.68	1.54703e-27	Inf	up
F02_cb11041_c83136/f1p0/3974	9	14	6	60	71	122	0.13	0.21	0.11	1.37	1.29	2.22	5.08508e-08	3.58937	up
F02_cb11041_c83844/f1p0/1514	0	0	0	143	138	162	0	0	0	10.1	7.63	9.04	3.89786e-29	Inf	up
F02_cb11041_c83857/f1p0/2470	0	0	0	71	33	82	0	0	0	2.71	0.99	2.49	1.44514e-12	Inf	up
F02_cb11041_c84146/f1p0/1853	55	10	30	167	328	382	2.04	0.38	1.37	10.07	15.5	18.25	7.59608e-08	3.71168	up
F02_cb11041_c84392/f1p0/2317	3	33	5	111	92	163	0.06	0.75	0.13	3.91	2.55	4.58	1.48478e-10	3.60639	up
F02_cb11041_c84426/f1p0/1311	6	11	9	57	18	64	0.32	0.58	0.59	4.7	1.15	4.12	0.0272698	2.85277	up
F02_cb11041_c84549/f1p0/1854	4	11	3	96	63	28	0.15	0.38	0.12	5.14	2.67	1.21	0.0325833	3.92122	up
F02_cb11041_c84647/f1p0/1336	7	0	9	375	343	613	0.35	0	0.54	29.76	21.19	38.32	2.53028e-38	6.81193	up
F02_cb11041_c84887/f1p0/2092	13	21	29	177	192	347	0.37	0.62	1.02	8.16	6.97	12.72	5.16963e-13	3.91177	up
F02_cb11041_c85056/f1p0/2020	6	11	9	94	109	114	0.2	0.35	0.35	4.55	4.16	4.36	2.87296e-11	4.06923	up
F02_cb11041_c85521/f1p0/1675	77	53	36	89	136	133	2.91	2.11	1.69	5.58	6.64	6.56	0.0131588	1.62782	up
F02_cb11041_c85793/f1p0/2788	7	17	8	266	213	290	0.14	0.37	0.21	8.87	5.62	7.71	1.38487e-24	5.05711	up
F02_cb11041_c86550/f3p1/1824	175	313	236	710	746	1212	5.8	10.82	9.7	38.52	31.79	52.21	3.25541e-06	2.32261	up
F02_cb11041_c86708/f1p0/2436	0	0	0	36	51	81	0	0	0	1.4	1.55	2.49	1.11221e-13	Inf	up
F02_cb11041_c86781/f1p0/2473	0	3	1	102	287	294	0	0.07	0.03	3.91	8.63	8.95	6.71677e-10	7.83521	up
F02_cb11041_c86813/f1p0/1616	33	141	63	334	341	414	1.27	5.63	2.99	20.97	16.77	20.61	8.30598e-10	2.65362	up
F02_cb11041_c87135/f1p0/1616	0	1	6	398	371	563	0	0.04	0.28	24.97	18.22	27.97	3.57978e-43	7.90038	up
F02_cb11041_c87263/f1p0/1854	0	0	0	48	45	95	0	0	0	2.72	1.99	4.21	6.61984e-15	Inf	up
F02_cb11041_c87326/f1p0/2258	5	6	11	236	230	329	0.14	0.17	0.35	9.93	7.62	11.02	3.48899e-28	5.59699	up
F02_cb11041_c87683/f1p0/1324	0	0	4	126	211	189	0	0	0.24	10.16	13.23	12	5.80067e-25	7.36313	up
F02_cb11041_c88596/f1p0/2077	145	126	113	180	214	314	4.13	3.76	4	8.41	7.85	11.65	0.0137725	1.35457	up
F02_cb11041_c88632/f1p1/1383	0	13	9	86	74	40	0	0.61	0.53	6.34	4.23	2.35	0.000341067	3.64008	up
F02_cb11041_c88752/f1p0/2391	0	5	4	72	29	66	0	0.15	0.15	2.87	0.91	2.09	4.55042e-06	4.61242	up
F02_cb11041_c88772/f1p1/1723	0	0	7	75	61	111	0	0	0.31	4.39	2.8	5.17	2.08014e-13	5.44103	up
F02_cb11041_c89220/f1p0/2637	3	0	0	57	55	86	0.07	0	0	2.02	1.54	2.43	6.84242e-13	6.68235	up
F02_cb11041_c89835/f1p0/1982	0	1	0	17	33	62	0	0.04	0	0.87	1.3	2.45	1.15744e-05	7.2334	up
F02_cb11041_c90256/f1p9/3554	0	0	0	126	45	105	0	0	0	3.22	0.92	2.16	2.52461e-09	Inf	up
F02_cb11041_c90521/f1p7/2639	0	0	0	58	119	225	0	0	0	2.08	3.33	6.36	1.98328e-08	Inf	up
F02_cb11041_c9072/f1p0/3104	0	0	0	157	355	44	0	0	0	4.68	8.39	1.05	0.00211074	Inf	up
F02_cb11041_c91559/f1p1/2244	428	210	322	53	75	67	11.21	5.78	10.48	2.27	2.56	2.3	0.000706245	-1.79595	down
F02_cb11041_c922/f2p0/2728	30	24	11	106	97	220	0.63	0.52	0.29	3.63	2.61	5.99	2.29282e-05	3.18853	up
F02_cb11041_c9320/f1p0/2354	0	0	1	26	151	72	0	0	0.03	1.09	4.82	2.33	0.00824849	8.30271	up
F02_cb11041_c96379/f1p10/3240	0	0	0	48	88	29	0	0	0	1.38	1.98	0.67	3.53733e-05	Inf	up
F02_cb11041_c9855/f1p0/2935	0	0	0	116	59	314	0	0	0	3.7	1.5	7.96	4.45522e-05	Inf	up
F02_cb11041_c993/f2p0/4412	23	7	15	82	50	81	0.29	0.09	0.23	1.67	0.8	1.31	0.000115107	2.74831	up
F02_cb11070_c6/f1p0/1449	0	0	0	65	50	80	0	0	0	4.75	2.85	4.59	2.17281e-15	Inf	up
F02_cb11070_c7/f1p0/1595	30	22	12	131	116	191	1.21	0.93	0.63	8.61	5.96	9.88	4.94571e-10	3.2823	up
F02_cb11070_c8/f1p0/1788	1	0	0	43	37	74	0.03	0	0	2.44	1.66	3.3	9.77617e-12	7.89218	up
F02_cb11093_c39/f1p0/3184	0	0	0	272	212	364	0	0	0	7.72	4.76	8.26	3.16036e-43	Inf	up
F02_cb11093_c41/f1p0/2444	1	0	2	66	66	86	0.02	0	0.06	2.55	2.02	2.66	4.75399e-14	6.601	up
F02_cb11093_c42/f1p0/2285	3	3	1	56	49	85	0.08	0.08	0.03	2.33	1.61	2.85	2.08803e-10	5.26749	up
F02_cb11133_c4/f1p0/1600	0	0	0	24	23	24	0	0	0	1.67	1.21	1.31	1.20045e-06	Inf	up
F02_cb11140_c6/f1p0/1613	3	0	0	300	879	479	0.13	0	0	20.63	47.14	26.03	9.1402e-08	9.78697	up
F02_cb1117_c3/f1p0/3964	1490	765	587	66	131	12	22.1	11.88	10.82	1.59	2.51	0.24	0.000115675	-3.1523	down
F02_cb1117_c6/f1p0/1917	80	75	74	0	2	18	2.55	2.5	2.93	0	0.11	0.75	0.000236321	-3.1845	down
F02_cb11221_c4/f1p0/2413	27	29	27	82	51	88	0.64	0.71	0.79	3.12	1.53	2.67	0.0142771	1.88315	up
F02_cb11241_c0/f1p0/1820	256	268	328	74	38	105	8.46	9.26	13.45	4.02	1.65	4.55	0.00651333	-1.53999	down
F02_cb11288_c0/f5p1/1814	3	11	5	222	65	94	0.1	0.38	0.21	12.12	2.79	4.07	0.0435378	4.81835	up
F02_cb11298_c3/f1p0/725	0	0	0	46	93	61	0	0	0	8.98	13.58	9.1	1.03599e-10	Inf	up
F02_cb1129_c2/f1p0/1857	98	92	81	229	175	236	3.14	3.1	3.23	12.02	7.2	9.86	0.000531478	1.72843	up
F02_cb11382_c0/f1p0/1798	29	22	24	82	38	69	0.97	0.77	1	4.51	1.64	3.01	0.0396882	1.8239	up
F02_cb11386_c3/f1p0/1178	0	17	28	57	95	182	0	1	2	5.42	6.94	13.42	0.00260626	3.22211	up
F02_cb11421_c1/f1p0/1909	96	63	82	12	9	8	3	2.06	3.19	0.62	0.36	0.33	0.00167733	-2.54216	down
F02_cb11433_c0/f3p0/1772	52	74	52	121	163	100	1.78	2.67	2.23	6.8	7.19	4.46	0.0209301	1.61587	up
F02_cb11508_c0/f1p0/1774	172	305	266	464	328	534	5.82	10.81	11.19	25.84	14.33	23.61	0.0254731	1.28369	up
F02_cb11512_c5/f1p0/1751	29	0	0	57	57	28	1.01	0	0	3.26	2.57	1.31	0.0278254	2.9926	up
F02_cb11516_c11/f1p0/1752	0	6	9	454	289	162	0	0.22	0.4	25.86	12.94	7.36	1.14712e-05	6.34653	up
F02_cb11516_c20/f1p0/1681	2	0	0	61	271	69	0.09	0	0	3.7	12.72	3.27	0.0390697	8.35459	up
F02_cb11516_c4/f6p0/1591	0	89	28	996	3174	1028	0.01	3.64	1.38	63.74	158.95	52.1	0.0195044	5.95617	up
F02_cb11516_c7/f4p1/1676	0	143	28	2971	2759	1325	0	5.46	1.27	178.41	129.83	63.07	6.75025e-08	5.86419	up
F02_cb11548_c0/f6p1/1548	0	23	0	193	433	287	0	0.98	0	12.79	22.44	15.06	9.50956e-08	5.80174	up
F02_cb11550_c149/f1p0/1343	0	0	0	49	42	23	0	0	0	3.91	2.66	1.5	2.07974e-08	Inf	up
F02_cb11614_c7/f1p0/2125	7	28	28	101	144	179	0.21	0.83	0.97	4.61	5.15	6.46	9.6082e-10	3.1598	up
F02_cb11645_c27/f1p1/737	39	28	19	0	0	0	4.27	3.18	2.65	0	0	0	7.37562e-05	#NAME?	down
F02_cb11654_c0/f5p0/1750	51	27	21	251	87	413	1.77	0.98	0.9	14.32	3.89	18.71	0.0294731	3.40364	up
F02_cb11665_c2/f1p0/1714	0	0	15	85	73	29	0	0	0.73	5.39	3.63	1.49	0.00466502	4.01787	up
F02_cb11690_c8/f1p0/1744	535	505	416	175	0	105	19.31	19.1	18.68	10.46	0	4.99	7.37562e-05	-1.88815	down
F02_cb11780_c8/f1p0/1760	0	0	2	105	60	96	0	0	0.09	5.98	2.67	4.34	2.97693e-17	7.34997	up
F02_cb11820_c0/f5p1/1549	0	0	0	207	171	103	0	0	0	13.75	8.85	5.41	8.33252e-14	Inf	up
F02_cb11891_c1/f1p0/1366	2	0	4	31	19	22	0.09	0	0.22	2.35	1.13	1.29	0.000888787	4.02653	up
F02_cb11983_c4/f1p2/1647	134	147	174	31	42	28	4.99	5.74	8.06	1.92	2.05	1.37	0.0107154	-1.68358	down
F02_cb11983_c6/f1p2/1583	207	126	125	0	53	55	8.05	5.16	6.09	0	2.67	2.83	0.0322105	-1.61425	down
F02_cb11997_c7/f1p3/1462	0	0	3	42	24	18	0	0	0.19	2.99	1.35	1.05	0.000438632	5.16996	up
F02_cb11997_c8/f1p3/1387	0	0	0	1499	744	1118	0	0	0	115.08	44.51	67.66	4.34835e-24	Inf	up
F02_cb12073_c2/f3p0/1773	20	47	22	93	78	111	0.69	1.69	0.94	5.23	3.46	4.98	0.000783782	2.13111	up
F02_cb12101_c9/f1p0/1266	0	0	6	73	52	111	0	0	0.49	7.06	3.84	8.34	2.79025e-13	5.59201	up
F02_cb12299_c11/f1p0/483	8	2	0	92	195	129	1.99	0.64	0	39.65	58.24	39.61	4.04677e-08	6.01199	up
F02_cb12299_c2/f1p0/1637	53	47	51	200	184	170	1.99	1.87	2.41	12.42	8.9	8.34	8.74211e-07	2.37226	up
F02_cb122_c17/f1p0/3671	0	2	3	2187	1226	3483	0	0.04	0.07	55.37	24.63	70.7	2.0756e-21	10.7744	up
F02_cb122_c24/f1p0/4038	1	2	1	2126	2621	1680	0.01	0.04	0.02	47.57	46.57	30.16	3.0182e-35	11.1561	up
F02_cb122_c37/f1p1/6416	0	2	7	5710	4182	4685	0	0.02	0.08	76.74	44.79	50.66	7.0659e-18	11.0289	up
F02_cb122_c38/f1p0/6325	0	0	0	4787	2032	6656	0	0	0	66.19	22.39	74.06	6.03852e-22	Inf	up
F02_cb122_c42/f1p1/5508	7	2	5	4309	2395	7373	0.07	0.03	0.07	68.24	30.2	93.88	5.43397e-18	10.4343	up
F02_cb12357_c0/f1p0/1604	144	194	100	49	0	0	5.52	7.75	4.78	3.09	0	0	0.00432122	-2.56954	down
F02_cb12361_c1/f2p0/670	1	0	1	39	41	141	0.13	0	0.16	8.82	6.9	23.62	0.000984097	7.193	up
F02_cb1236_c13/f1p0/1864	403	151	337	0	88	0	12.84	5.05	13.34	0	3.62	0	0.0197866	-2.75377	down
F02_cb1236_c14/f1p0/2541	1964	1049	840	300	336	237	44.2	24.71	23.5	11.02	9.76	6.97	0.0265616	-1.58851	down
F02_cb12435_c3/f1p0/1612	0	0	0	142	172	112	0	0	0	8.85	8.4	5.53	2.13555e-22	Inf	up
F02_cb12449_c1/f1p0/1791	1	6	6	24	33	25	0.03	0.21	0.25	1.34	1.46	1.1	0.00600145	3.08942	up
F02_cb12456_c1/f8p0/745	0	14	4	721	2311	1978	0	1.58	0.57	133.41	320.63	278.73	5.93233e-10	8.55416	up
F02_cb12465_c3/f1p0/982	0	1	0	26	37	32	0	0.07	0	3.13	3.42	3	1.01854e-07	7.05477	up
F02_cb12484_c0/f3p0/1562	257	274	144	86	46	63	10.19	11.37	7.1	5.63	2.36	3.26	0.0473433	-1.27309	down
F02_cb12683_c6/f1p0/1094	53	42	40	133	124	94	3.32	2.73	3.08	13.82	9.94	7.64	0.00194203	1.89962	up
F02_cb12685_c7/f1p0/1619	66	23	20	0	0	0	2.53	0.94	0.96	0	0	0	0.00106078	#NAME?	down
F02_cb12783_c1/f1p0/1666	74	87	65	176	113	158	2.72	3.34	2.97	10.65	5.36	7.57	0.0150649	1.47277	up
F02_cb12812_c0/f2p0/1543	1	8	3	96	86	133	0.04	0.34	0.15	6.38	4.47	6.99	7.35298e-15	5.14978	up
F02_cb12858_c1/f1p0/2176	0	2	4	38	34	33	0	0.06	0.13	1.67	1.18	1.16	5.82693e-06	4.5153	up
F02_cb12872_c3/f2p0/1465	41	31	0	89	65	80	1.8	1.43	0	6.34	3.62	4.49	0.00193299	2.28339	up
F02_cb12876_c3/f1p0/1411	0	0	2	813	697	301	0	0	0.11	61.82	41.3	18.05	4.62271e-11	10.1976	up
F02_cb12907_c4/f1p0/1273	24	21	19	385	525	457	1.24	1.14	1.22	32.65	34.55	30.49	7.73762e-26	4.91718	up
F02_cb12922_c4/f2p1/1510	50	28	63	136	157	267	2.07	1.22	3.27	9.31	8.39	14.41	2.41553e-07	2.42379	up
F02_cb12943_c0/f3p0/1326	32	106	29	116	133	266	1.59	5.41	1.8	9.36	8.39	16.89	0.0152256	2.06498	up
F02_cb12954_c5/f1p0/1888	18	26	22	142	113	138	0.59	0.88	0.89	7.41	4.63	5.74	1.55164e-08	3.04672	up
F02_cb13073_c0/f1p0/1482	16	2	12	37	29	37	0.68	0.09	0.63	2.59	1.58	2.04	0.0459621	2.28339	up
F02_cb13089_c0/f1p0/1479	0	0	0	21	16	54	0	0	0	1.53	0.89	3.01	5.08258e-05	Inf	up
F02_cb13089_c1/f1p0/1768	0	0	0	105	85	176	0	0	0	5.96	3.76	7.87	3.58762e-24	Inf	up
F02_cb13089_c3/f1p0/787	0	1	0	43	27	51	0	0.1	0	7.36	3.51	6.63	1.3868e-09	7.38118	up
F02_cb1309_c4/f1p0/3610	140	102	108	303	200	373	2.14	1.63	2.05	7.53	3.95	7.43	0.000121527	1.80182	up
F02_cb13101_c3/f1p1/1473	8	0	0	89	227	174	0.37	0	0	6.24	12.46	9.67	5.33907e-08	6.5958	up
F02_cb13101_c7/f1p0/1591	2	0	0	57	56	56	0.08	0	0	3.67	2.8	2.84	6.05655e-12	7.06648	up
F02_cb13135_c0/f3p0/1345	49	71	75	124	155	233	2.34	3.54	4.46	9.81	9.59	14.52	0.000237871	1.82547	up
F02_cb13155_c6/f1p0/1260	11	0	18	25	62	44	0.59	0	1.17	2.18	4.18	3.04	0.0363746	2.62358	up
F02_cb13170_c0/f2p0/1369	0	0	0	35	72	62	0	0	0	2.76	4.38	3.81	4.17655e-13	Inf	up
F02_cb13240_c42/f2p28/7378	0	6	12	3861	10136	11586	0	0.05	0.12	45.15	94.5	109.09	2.45668e-08	10.8217	up
F02_cb13240_c43/f2p0/1417	2	2	3	3213	11437	7501	0.09	0.09	0.17	237.61	659.4	437.69	5.37844e-11	12.0904	up
F02_cb13240_c44/f2p0/710	0	0	0	428	1070	452	0	0	0	85.83	160.17	68.87	1.07134e-08	Inf	up
F02_cb13240_c47/f1p0/1448	0	1	0	2043	6158	6202	0	0.06	0	147.01	345.74	352.38	2.50929e-18	14.2738	up
F02_cb13240_c93/f1p26/5269	0	2	0	619	1989	3986	0	0.03	0	10.32	26.37	53.37	5.96705e-08	12.0988	up
F02_cb13300_c30/f5p0/1905	29	23	21	294	197	310	0.92	0.76	0.83	15.18	7.98	12.72	1.13632e-17	3.94753	up
F02_cb13339_c0/f1p0/1414	6	4	4	39	24	36	0.27	0.19	0.22	2.92	1.37	2.12	0.00111742	3.32566	up
F02_cb13354_c1/f1p0/3194	3	1	0	37	26	56	0.05	0.02	0	1.06	0.59	1.28	1.35756e-07	5.47603	up
F02_cb13374_c0/f2p0/1399	0	0	0	92	84	73	0	0	0	6.96	4.95	4.38	9.95937e-19	Inf	up
F02_cb13374_c1/f1p0/1417	0	0	0	148	94	225	0	0	0	10.88	5.41	13.03	5.72399e-20	Inf	up
F02_cb13398_c0/f4p0/1321	298	222	152	60	93	36	14.51	11.32	9.24	4.93	5.88	2.29	0.0358846	-1.26845	down
F02_cb13412_c2/f1p0/1537	18	159	0	140	171	320	0.84	7.44	0	10.4	9.9	18.71	0.0337293	2.29002	up
F02_cb13419_c0/f1p0/1391	4	2	0	57	54	84	0.22	0.1	0	4.34	3.19	5.04	4.21479e-11	5.59906	up
F02_cb13419_c1/f1p0/1715	2	1	0	18	18	38	0.08	0.04	0	1.09	0.86	1.79	6.88419e-05	5.17859	up
F02_cb1342_c5/f1p0/4212	152	217	159	48	41	37	1.99	2.97	2.59	1.03	0.7	0.63	0.0127321	-1.57135	down
F02_cb13445_c23/f3p1/2345	19	47	38	68	70	122	0.49	1.22	1.18	2.77	2.25	3.93	0.0119107	1.74262	up
F02_cb13448_c1/f1p0/2622	11	5	10	97	96	145	0.24	0.11	0.27	3.45	2.7	4.13	4.34982e-12	4.16917	up
F02_cb1352_c9/f1p0/2473	0	0	0	55	34	67	0	0	0	2.09	1.02	2.04	5.96092e-13	Inf	up
F02_cb13572_c0/f2p0/1358	0	3	0	76	91	82	0	0.15	0	5.93	5.53	5.04	7.63843e-16	6.86198	up
F02_cb13603_c20/f1p1/727	924	706	697	180	265	208	102.37	82.07	96.17	34.72	38.25	30.47	0.0297829	-1.32543	down
F02_cb13607_c3/f1p2/1271	176	183	143	27	11	35	9.01	9.83	9.12	2.36	0.73	2.39	7.19684e-05	-2.32252	down
F02_cb13631_c4/f1p0/756	107	20	16	198	250	274	11.69	2.37	2.24	37.55	35.56	39.65	4.11476e-10	2.92157	up
F02_cb13653_c12/f1p2/1237	429	225	347	0	31	33	22.58	12.4	22.68	0	2.14	2.32	1.08664e-09	-3.51516	down
F02_cb1365_c0/f1p0/3804	0	22	13	101	55	127	0	0.33	0.23	2.36	1.03	2.38	2.68935e-07	3.41089	up
F02_cb13667_c1/f1p1/2063	42	44	14	229	136	227	1.2	1.31	0.5	10.71	5.01	8.45	2.96519e-10	3.08689	up
F02_cb13688_c4/f1p0/1400	415	271	330	784	794	1020	18.79	12.86	18.6	58.89	46.49	60.46	0.00109152	1.84042	up
F02_cb13787_c10/f1p2/1324	10	28	25	1346	1356	6680	0.52	1.43	1.56	108.57	85.06	424.21	0.0109605	7.56233	up
F02_cb13817_c1/f8p3/1035	12	5	16	5472	5158	4932	0.85	0.38	1.37	614.11	445.35	431.5	1.26688e-13	9.35381	up
F02_cb13817_c8/f1p2/1077	15	8	4	2964	2855	2099	0.95	0.57	0.35	314.75	233.69	174.12	8.61445e-25	8.77111	up
F02_cb13824_c1/f1p0/1258	1	0	2	19	19	24	0.05	0	0.13	1.64	1.27	1.63	0.000519526	4.789	up
F02_cb13830_c5/f4p2/1021	330	301	303	52	81	54	22.44	21.45	25.59	5.98	7.18	4.89	0.000174779	-1.81617	down
F02_cb13835_c20/f2p4/1080	41	28	78	0	0	0	2.64	1.9	6.19	0	0	0	0.000994907	#NAME?	down
F02_cb13848_c13/f1p1/853	9	0	0	405	914	652	0.87	0	0	61.1	104.68	75.82	3.87376e-13	8.44043	up
F02_cb13848_c6/f3p1/876	5	3	0	90	173	122	0.5	0.31	0	12.96	18.89	13.48	8.89562e-11	6.18825	up
F02_cb13893_c15/f4p0/919	0	0	0	16	23	25	0	0	0	2.25	2.41	2.64	5.29609e-06	Inf	up
F02_cb1391_c43/f1p1/2688	259	214	108	475	821	529	5.64	4.87	2.92	16.82	22.98	14.96	0.00562747	2.19409	up
F02_cb13928_c3/f1p3/1952	0	0	0	2895	123	928	0	0	0	144.89	4.86	36.93	0.00962966	Inf	up
F02_cb13928_c7/f1p0/469	0	0	0	332	16	126	0	0	0	159.3	5.24	42.26	0.0410171	Inf	up
F02_cb139_c57/f1p2/4513	58	129	112	192	152	177	0.7	1.64	1.69	3.77	2.37	2.8	0.0429603	1.25716	up
F02_cb14054_c7/f1p0/1937	711	604	530	135	136	149	21.91	19.46	20.28	6.84	5.43	6.02	0.0010871	-1.63684	down
F02_cb14081_c1/f1p0/1287	54	24	70	0	0	0	2.73	1.27	4.43	0	0	0	6.80608e-05	#NAME?	down
F02_cb14083_c2/f1p0/770	96	176	107	386	479	278	10.22	19.71	14.29	71.22	66.33	39.21	0.00355531	2.09877	up
F02_cb14084_c0/f2p0/841	0	0	0	91	171	59	0	0	0	13.85	19.83	7.01	2.4414e-06	Inf	up
F02_cb14133_c4/f1p0/573	0	0	0	67	222	74	0	0	0	20.22	48.15	16.5	0.000617426	Inf	up
F02_cb14152_c0/f1p0/1216	0	0	0	26	38	43	0	0	0	2.38	2.69	3.08	1.51022e-09	Inf	up
F02_cb14152_c1/f1p0/1728	0	0	0	41	30	40	0	0	0	2.4	1.38	1.86	7.21968e-10	Inf	up
F02_cb14175_c2/f1p0/1006	11	8	15	58	70	93	0.78	0.64	1.31	6.88	6.32	8.52	4.18353e-06	3.14543	up
F02_cb1417_c34/f1p0/3483	82	85	62	0	5	0	1.31	1.42	1.24	0	0.12	0	2.9647e-08	-4.9295	down
F02_cb14223_c1/f1p0/3333	83	46	44	111	149	125	1.37	0.8	0.9	2.98	3.19	2.69	0.00705607	1.6821	up
F02_cb14237_c2/f1p0/1133	99	108	89	197	174	161	5.88	6.73	6.61	19.59	13.38	12.51	0.0292203	1.34716	up
F02_cb14246_c6/f1p0/1167	7	0	0	70	763	765	0.42	0	0	6.7	56.24	57.08	0.000488236	8.46039	up
F02_cb14247_c1/f1p0/1540	1	0	0	110	84	119	0.04	0	0	7.29	4.35	6.24	3.59489e-21	8.9426	up
F02_cb14267_c2/f1p0/2229	4	4	4	32	20	26	0.11	0.12	0.15	1.38	0.7	0.89	0.00701051	3.18813	up
F02_cb14304_c4/f1p1/2018	1	0	0	656	802	451	0.03	0	0	31.59	30.37	17.29	2.75588e-22	11.5892	up
F02_cb14304_c6/f1p0/1311	0	0	1	476	423	280	0	0	0.06	39.62	27.35	18.35	1.05151e-21	10.5598	up
F02_cb1433_c0/f1p0/3801	13	15	29	80	54	41	0.2	0.23	0.53	1.9	1.02	0.78	0.0480207	2.08641	up
F02_cb14410_c0/f1p0/1119	41	24	23	184	216	347	2.45	1.5	1.71	18.45	16.73	27.23	6.0972e-15	3.57237	up
F02_cb14469_c0/f2p0/977	0	0	0	70	64	107	0	0	0	8.52	5.98	10.13	4.26749e-18	Inf	up
F02_cb14469_c1/f1p0/2639	0	0	0	52	58	85	0	0	0	1.86	1.64	2.42	2.26615e-15	Inf	up
F02_cb14469_c2/f1p0/1083	0	3	4	72	64	98	0	0.2	0.31	7.63	5.22	8.09	9.54749e-13	5.43559	up
F02_cb14508_c1/f1p0/1357	0	0	0	189	66	116	0	0	0	14.86	4.04	7.19	1.0434e-07	Inf	up
F02_cb14520_c3/f1p0/1184	40	58	17	111	98	139	2.28	3.4	1.22	10.39	7.15	10.24	0.000360175	2.10056	up
F02_cb14525_c1/f1p0/790	154	80	86	241	314	303	15.02	8.18	10.45	40.48	39.8	39	4.02769e-05	1.94118	up
F02_cb14562_c0/f1p0/906	1	1	1	29	39	44	0.08	0.09	0.1	3.94	4.05	4.63	1.16261e-07	5.69407	up
F02_cb1461_c5/f1p0/3751	0	0	0	24	25	67	0	0	0	0.6	0.49	1.29	2.31896e-06	Inf	up
F02_cb14655_c1/f1p0/2613	0	1	0	95	92	63	0	0.02	0	3.42	2.61	1.81	1.43216e-17	8.47316	up
F02_cb14696_c1/f1p0/2685	6	1	3	196	151	284	0.13	0.04	0.08	6.81	4.16	7.88	8.30856e-29	6.48718	up
F02_cb14696_c2/f1p0/5673	0	7	4	165	178	283	0	0.07	0.06	2.55	2.19	3.51	3.78438e-28	6.22635	up
F02_cb14740_c2/f1p0/1235	0	3	0	56	53	69	0	0.17	0	5.03	3.67	4.79	9.06117e-12	6.36216	up
F02_cb14744_c1/f1p0/1722	61	102	76	0	0	0	2.16	3.81	3.36	0	0	0	2.8731e-12	#NAME?	down
F02_cb14752_c0/f1p0/1198	0	2	2	21	50	53	0	0.17	0.17	1.96	3.63	3.9	2.71446e-07	5.33533	up
F02_cb14756_c1/f1p0/1948	0	0	0	22	16	18	0	0	0	1.11	0.65	0.72	2.79852e-05	Inf	up
F02_cb14826_c1/f1p0/3033	14	8	3	68	37	136	0.26	0.16	0.07	2.06	0.89	3.29	0.00530792	3.76897	up
F02_cb14864_c0/f1p0/923	4	0	2	33	16	55	0.31	0	0.19	4.39	1.69	5.59	0.000190134	4.60757	up
F02_cb14932_c1/f1p0/2416	0	3	1	36	64	48	0	0.08	0.03	1.41	1.97	1.5	1.79567e-09	5.65741	up
F02_cb14992_c1/f1p0/2646	83	78	42	186	140	222	1.79	1.77	1.13	6.54	3.91	6.24	0.000116899	1.93495	up
F02_cb15009_c0/f1p0/584	0	0	0	25	22	28	0	0	0	7.21	4.6	5.97	5.63178e-07	Inf	up
F02_cb1504_c38/f1p0/2095	76	101	94	5	0	38	2.21	3.05	3.39	0.26	0	1.45	0.00761944	-2.33365	down
F02_cb15073_c131/f1p0/652	36	12	29	133	694	782	5.74	2.1	5.92	38.48	144.77	166.1	0.00624938	4.8471	up
F02_cb15073_c292/f1p1/613	43	11	40	890	3091	3572	6.41	1.76	7.37	231.85	588.89	692.98	6.91728e-07	6.78402	up
F02_cb15073_c400/f1p0/508	0	0	0	2530	7364	4994	0	0	0	1020.42	2075.61	1438.25	2.79289e-16	Inf	up
F02_cb15073_c477/f1p1/753	9	11	15	52	184	184	0.95	1.26	2.01	9.45	25.09	25.45	0.00272025	4.01618	up
F02_cb15106_c17/f1p0/1240	140	163	85	37	31	11	7.41	9.01	5.61	3.25	2.12	0.79	0.0102982	-1.73424	down
F02_cb15118_c0/f1p0/816	92	73	38	84	151	171	8.55	7.12	4.43	13.4	18.24	20.96	0.0179978	1.50881	up
F02_cb15119_c26/f1p0/1075	235	143	106	21	36	29	17.87	11.39	10.09	2.75	3.59	2.94	0.00102201	-1.961	down
F02_cb15119_c36/f1p0/958	1581	1699	1511	323	450	369	117.02	131.85	139.22	40.51	43.19	35.95	0.0330825	-1.57609	down
F02_cb15185_c4/f1p0/871	3	1	0	69	76	50	0.27	0.18	0	10	8.42	5.67	3.15455e-12	6.24578	up
F02_cb15195_c17/f1p0/1266	496	848	220	0	0	13	25.68	46.01	14.17	0	0	0.94	0.0001355	-6.58309	down
F02_cb15245_c3/f2p0/712	0	0	0	323	360	331	0	0	0	64.33	53.46	50.04	3.87356e-46	Inf	up
F02_cb15250_c1/f1p0/1040	4	7	8	71	59	89	0.26	0.49	0.68	7.9	5.05	7.73	2.08089e-08	3.96031	up
F02_cb15290_c101/f26p0/466	0	1	2	2933	1745	1699	0	0.26	0.63	1430.26	580.04	577.86	6.02495e-22	11.4524	up
F02_cb15290_c11/f1p3/854	23	77	48	5580	1475	4238	2.07	6.99	5.16	823.74	165.58	482.42	1.36307e-05	6.702	up
F02_cb15290_c114/f15p10/772	2	0	1	1591	715	1742	0.25	0	0.13	277.49	93.94	232.27	2.24221e-22	10.9171	up
F02_cb15290_c221/f2p2/633	0	0	1	1673	359	335	0	0	0.17	412.43	65.09	61.92	0.00592859	11.5904	up
F02_cb15290_c433/f1p0/907	47	79	124	3044	1816	7136	4.56	8	14.82	502.23	226.35	902.91	7.29757e-05	5.95063	up
F02_cb15290_c477/f1p0/597	31	9	20	809	486	834	4.92	1.49	4.13	230.38	100.53	175.59	4.12343e-25	5.65241	up
F02_cb15290_c492/f1p0/1052	0	0	0	55	44	101	0	0	0	6.22	3.82	8.83	5.97201e-15	Inf	up
F02_cb15290_c498/f1p0/744	0	0	0	1971	750	1319	0	0	0	382.33	108.89	194.58	6.00458e-15	Inf	up
F02_cb15290_c508/f1p0/680	4	6	5	10136	4659	7938	0.56	0.89	0.88	2543.44	857.99	1488.15	8.08637e-10	11.0379	up
F02_cb15290_c513/f1p0/1132	0	0	0	517	276	243	0	0	0	51.15	21.15	18.82	1.70715e-11	Inf	up
F02_cb15290_c568/f1p3/1164	0	15	0	502	271	252	0	0.94	0	47.85	19.99	18.87	5.80359e-08	6.60358	up
F02_cb15290_c726/f1p1/706	0	0	0	4040	758	1115	0	0	0	871.28	121.49	181.58	0.000300032	Inf	up
F02_cb15290_c730/f1p0/945	0	21	1	603	199	307	0	1.66	0.09	77.06	19.46	30.44	0.000410413	6.1492	up
F02_cb15290_c746/f1p0/632	0	1	0	655	200	439	0.08	0.16	0	182.18	40.61	90.4	8.28693e-09	10.8221	up
F02_cb15290_c76/f38p5/1229	0	0	0	109	169	98	0	0	0	9.7	11.7	6.89	9.4394e-15	Inf	up
F02_cb15290_c806/f1p0/585	0	0	0	53	66	55	0	0	0	15.18	13.71	11.65	3.64104e-14	Inf	up
F02_cb15290_c807/f1p0/632	0	0	0	20	55	21	0	0	0	4.94	10.07	3.94	0.00151864	Inf	up
F02_cb1530_c1/f1p0/3753	167	229	189	29	46	20	2.48	3.55	3.48	0.71	0.89	0.39	7.86898e-05	-2.10896	down
F02_cb15347_c0/f2p0/344	6	0	1	197	152	338	3.43	0	0.72	273.71	121.2	271.33	6.28259e-19	7.18639	up
F02_cb15353_c2/f1p0/946	8	1	4	35	34	35	0.6	0.08	0.37	4.47	3.33	3.47	0.000399782	3.53951	up
F02_cb15353_c3/f1p0/834	0	0	0	29	43	24	0	0	0	4.47	5.03	2.85	9.26945e-09	Inf	up
F02_cb15353_c4/f1p0/817	0	2	2	19	22	26	0	0.19	0.23	2.99	2.62	3.15	0.00050609	4.45792	up
F02_cb15414_c1/f1p0/1057	169	172	188	34	76	31	11.01	11.68	15.16	3.7	6.38	2.64	0.0363746	-1.39612	down
F02_cb15471_c14/f1p0/491	228	146	104	0	0	0	59.68	40.37	34.28	0	0	0	2.93506e-20	#NAME?	down
F02_cb15516_c4/f12p0/594	263	341	893	2638	1431	4488	40.84	55.57	172.85	735.44	290.26	926.86	0.00293142	2.88296	up
F02_cb1551_c54/f1p0/1839	5	12	17	30	42	68	0.18	0.44	0.7	1.62	1.78	2.92	0.00437534	2.4308	up
F02_cb15522_c2/f1p1/1059	44	42	37	120	110	144	2.89	2.87	2.97	13.06	9.21	12.21	0.00021611	2.08767	up
F02_cb15527_c2/f11p3/671	150	24	54	796	778	1685	18.93	3.21	8.49	176.4	127.72	281.35	1.01301e-08	4.34756	up
F02_cb15527_c20/f1p0/682	39	12	12	46	128	164	4.78	1.54	1.86	9.89	20.57	26.7	0.0162064	2.94355	up
F02_cb15527_c23/f63p2/761	1466	380	616	2505	3250	4268	151.29	41.13	79.18	447.14	436.18	581.9	0.0216201	2.5472	up
F02_cb15527_c5/f6p0/739	179	64	53	371	338	470	19.37	7.25	7.24	69.51	47.53	67.18	1.68233e-08	2.53687	up
F02_cb15544_c8/f1p1/1050	268	130	185	21	47	26	17.91	9.15	15.42	2.39	4.11	2.34	0.000209097	-2.10609	down
F02_cb15578_c1/f1p0/942	0	0	1	38	26	43	0	0	0.12	4.89	2.59	4.34	1.38767e-08	7.05436	up
F02_cb15592_c1/f2p1/663	3	4	2	50	44	54	0.41	0.57	0.34	11.51	7.44	9.31	1.75783e-07	4.53705	up
F02_cb15602_c0/f2p0/1005	0	5	2	150	132	300	0	0.36	0.17	17.54	11.86	27.32	4.47409e-14	6.76824	up
F02_cb15659_c2/f1p0/960	0	1	3	129	21	161	0	0.08	0.28	16.11	2.01	15.7	0.00120814	6.59937	up
F02_cb15660_c1/f3p0/1125	38	36	31	66	91	112	2.28	2.29	2.37	6.65	7.06	8.83	0.00816315	1.83365	up
F02_cb15693_c14/f1p0/574	46	267	119	0	0	0	7.59	46.27	24.52	0	0	0	0.00160302	#NAME?	down
F02_cb15708_c72/f1p0/459	1	1	0	6952	1620	50	0.42	0.51	0.29	3641.27	572.59	18.28	0.0421887	12.7313	up
F02_cb15738_c0/f2p1/1141	56	141	95	150	205	237	3.33	8.71	6.94	14.78	15.61	18.27	0.00539201	1.46689	up
F02_cb15807_c8/f2p0/615	63	25	34	112	202	421	9.18	3.83	6.18	29.16	38.48	81.66	0.0326559	3.05368	up
F02_cb15815_c3/f1p0/852	89	30	51	922	708	2226	7.6	2.69	5.42	134.52	78.56	250.49	9.56633e-05	4.9628	up
F02_cb15816_c3/f1p1/785	130	202	120	302	532	447	12.86	20.92	14.77	51.42	68.12	58.21	0.000312632	1.98966	up
F02_cb1581_c12/f1p0/2765	0	0	0	179	37	181	0	0	0	6.01	1.01	4.86	2.16473e-06	Inf	up
F02_cb15937_c1/f2p0/742	32	8	13	98	45	120	3.46	0.9	1.74	18.24	6.28	17.02	0.000850587	2.82694	up
F02_cb15937_c2/f2p0/848	90	21	32	204	181	288	7.98	2.02	3.55	30.72	20.69	33.41	2.55972e-09	2.76635	up
F02_cb15939_c1/f1p1/1064	9	67	44	98	84	130	0.62	4.51	3.53	10.63	7.01	11	0.00344088	1.79561	up
F02_cb1598_c1/f2p1/3382	23	53	124	275	172	222	0.39	0.93	2.55	7.39	3.67	4.79	0.000375105	2.14873	up
F02_cb1598_c11/f1p0/2052	6	21	49	134	96	158	0.18	0.65	1.77	6.37	3.61	5.98	1.5921e-07	2.72897	up
F02_cb1598_c2/f1p0/3720	3	10	5	45	36	21	0.05	0.16	0.1	1.11	0.7	0.41	0.00430106	3.00476	up
F02_cb1598_c5/f1p0/2597	5	18	26	81	47	86	0.12	0.41	0.71	2.89	1.34	2.47	0.000227721	2.52654	up
F02_cb16016_c3/f3p1/608	10	6	10	69	110	143	1.49	0.94	2.01	18.41	21.52	28.31	2.03302e-11	4.08856	up
F02_cb1602_c0/f2p0/3715	0	0	0	118	44	121	0	0	0	2.86	0.85	2.35	1.74928e-10	Inf	up
F02_cb16032_c14/f10p1/1223	0	0	0	268	467	551	0	0	0	24.05	32.45	38.7	4.27726e-32	Inf	up
F02_cb16032_c9/f1p0/1261	92	86	69	698	1832	1301	4.84	4.7	4.52	60.7	123.62	88.87	9.38705e-05	4.4565	up
F02_cb160_c5/f1p0/3800	1	0	0	423	316	495	0.02	0	0	9.96	5.92	9.36	2.80414e-47	10.9161	up
F02_cb160_c8/f1p0/1785	0	0	0	54	31	53	0	0	0	2.98	1.34	2.31	8.87098e-12	Inf	up
F02_cb16110_c0/f1p0/1013	39	93	35	103	122	120	2.69	6.75	3.07	11.92	10.86	10.82	0.0231131	1.5339	up
F02_cb16174_c0/f2p0/1091	10	9	14	133	154	406	0.67	0.6	1.08	13.9	12.38	33.03	0.000335295	4.79132	up
F02_cb16174_c1/f2p0/375	4	2	3	18	50	57	2.16	0.93	1.65	18.25	30.31	34.71	0.000221538	4.26925	up
F02_cb16219_c0/f3p0/800	143	297	122	443	666	883	13.75	29.77	14.61	72.89	82.7	111.32	1.07814e-06	2.28933	up
F02_cb16219_c2/f3p0/741	18	31	4	395	907	1011	1.93	3.5	0.54	73.67	126.86	143.66	7.27817e-11	5.95119	up
F02_cb16219_c5/f1p0/765	1	4	1	256	1116	950	0.1	0.43	0.13	44.92	147.39	127.42	2.71446e-07	9.0625	up
F02_cb16241_c1/f2p0/780	0	0	0	46	146	74	0	0	0	7.93	18.99	9.73	2.22207e-05	Inf	up
F02_cb16246_c9/f8p0/777	350	36	55	379	810	887	35.04	3.84	6.97	65.39	105.33	117.16	0.000975557	2.81363	up
F02_cb1624_c12/f1p0/3559	175	194	182	323	311	319	2.75	3.18	3.55	8.22	6.29	6.5	0.0298768	1.27553	up
F02_cb16258_c7/f9p0/469	6	2	0	47	200	150	1.48	0.52	0	22.53	65.5	50.41	0.000588663	6.23911	up
F02_cb16314_c0/f2p1/978	279	147	146	317	425	353	20.12	11.13	13.14	38.55	39.64	33.4	0.00827202	1.4667	up
F02_cb16388_c7/f2p0/442	0	0	0	445	806	762	0	0	0	251.9	304.33	294.23	4.28189e-34	Inf	up
F02_cb16422_c1/f1p0/709	0	0	0	15	34	22	0	0	0	3.01	5.1	3.35	1.45622e-06	Inf	up
F02_cb16427_c1/f1p0/418	0	0	0	101	99	26	0	0	0	68.2	43.37	11.65	1.60287e-05	Inf	up
F02_cb16479_c1/f1p0/706	1	2	3	32	34	48	0.12	0.24	0.43	6.53	5.12	7.4	1.70705e-06	4.6577	up
F02_cb16490_c0/f2p0/537	19	18	13	39	69	83	3.62	3.72	3.04	13.45	16.99	20.85	0.00154678	2.41396	up
F02_cb1649_c0/f6p0/3578	26	31	31	175	110	197	0.41	0.51	0.61	4.43	2.21	3.99	4.50974e-09	2.9115	up
F02_cb16584_c0/f2p0/1144	15	45	26	126	154	232	0.92	2.76	1.89	12.32	11.65	17.8	5.42414e-10	3.00755	up
F02_cb1659_c9/f1p0/3052	0	0	0	74	31	23	0	0	0	2.28	0.76	0.57	0.00108691	Inf	up
F02_cb16603_c0/f1p0/413	37	48	33	75	117	91	12.41	17.06	13.91	52.24	52.61	41.84	0.0119107	1.75817	up
F02_cb16623_c2/f1p0/1222	85	51	58	8	18	0	4.65	2.92	3.96	0.8	1.32	0	0.0102982	-2.30246	down
F02_cb1663_c16/f1p1/2171	0	0	0	62	97	44	0	0	0	2.78	3.4	1.58	1.15139e-08	Inf	up
F02_cb1663_c21/f1p0/2255	124	54	43	250	271	213	3.23	1.47	1.39	10.62	9.07	7.22	1.26528e-06	2.29322	up
F02_cb1663_c9/f1p0/1588	3	97	0	87	102	119	0.12	3.95	0	5.62	5.14	6.07	0.0146112	2.0997	up
F02_cb16649_c3/f5p0/463	0	1	1	94	168	100	0	0.27	0.32	46.84	57.02	34.55	2.14619e-11	7.92135	up
F02_cb16649_c4/f5p0/466	0	1	2	366	659	499	0	0.26	0.63	178.74	219.05	169.95	4.07438e-23	9.37112	up
F02_cb16713_c305/f3p0/392	42	135	45	314	334	199	16.24	55.7	22.19	261.22	174.41	105.97	0.00120543	2.4424	up
F02_cb16738_c7/f1p0/920	357	402	255	47	132	89	27.99	33.03	24.87	6.3	13.44	9.19	0.00861391	-1.41528	down
F02_cb16743_c0/f2p0/650	0	0	0	17	30	29	0	0	0	3.95	5.15	5.07	4.63584e-07	Inf	up
F02_cb16766_c1/f2p0/1263	0	0	2	617	407	624	0	0	0.13	52.93	27.14	42.06	1.83329e-48	10.0056	up
F02_cb16766_c2/f1p0/903	0	0	0	40	45	63	0	0	0	5.75	4.88	6.99	1.97593e-12	Inf	up
F02_cb16766_c3/f1p0/1160	0	0	0	268	216	328	0	0	0	25.75	16.06	24.71	1.85992e-42	Inf	up
F02_cb16766_c5/f1p0/1001	0	0	0	53	82	81	0	0	0	6.25	7.4	7.49	1.10917e-16	Inf	up
F02_cb16766_c6/f1p0/1061	0	0	0	325	303	423	0	0	0	35.23	25.28	35.7	1.23306e-46	Inf	up
F02_cb16766_c7/f1p0/1017	0	0	0	28	23	56	0	0	0	3.53	2.23	5.49	1.74448e-09	Inf	up
F02_cb16768_c2/f1p0/557	3	7	2	42	30	40	0.52	1.28	0.44	13.37	6.86	9.32	9.48735e-05	3.71697	up
F02_cb16796_c1/f2p0/597	19	5	20	287	624	377	2.92	0.96	4.01	79.29	125.53	77.3	1.3561e-06	5.36658	up
F02_cb1684_c2/f1p0/2336	0	0	6	22	16	18	0	0	0.22	1	0.57	0.64	0.0111542	3.55679	up
F02_cb16875_c0/f1p0/1269	24	55	10	96	90	68	1.26	2.95	0.69	8.12	5.95	4.53	0.00390337	2.04355	up
F02_cb16887_c11/f1p8/6243	0	0	2	83	603	1747	0	0	0.02	1.16	6.7	19.58	0.00398621	10.4735	up
F02_cb16887_c12/f1p2/4910	0	0	1	37	184	811	0	0	0.02	0.68	2.63	11.71	0.0478841	10.2167	up
F02_cb16968_c1/f1p0/987	13	8	18	30	51	53	0.98	0.6	1.59	3.64	4.73	5.01	0.0174128	2.23081	up
F02_cb16996_c0/f1p0/1158	0	0	0	17	19	18	0	0	0	1.66	1.46	1.42	4.42486e-05	Inf	up
F02_cb17020_c0/f1p0/642	592	532	458	89	206	135	80.25	75.69	77.51	21.48	36.49	24.37	0.0119107	-1.37254	down
F02_cb17084_c5/f1p0/616	159	164	201	0	20	58	23.17	25.09	36.47	0	3.88	11.33	0.000260459	-2.38716	down
F02_cb17167_c15/f1p0/610	2	0	0	42	61	74	0.3	0	0	11.11	11.79	14.68	2.24815e-12	7.10992	up
F02_cb17297_c1/f1p0/774	1	0	0	54	60	47	0.1	0	0	9.28	7.77	6.28	2.71475e-12	8.00694	up
F02_cb17304_c8/f1p0/736	0	0	0	16	85	89	0	0	0	3.19	12.14	12.82	5.55095e-05	Inf	up
F02_cb17414_c1/f3p0/569	0	2	0	288	117	155	0	0.35	0	87.83	25.87	34.81	1.51487e-07	8.63026	up
F02_cb17414_c6/f1p0/622	0	1	0	273	77	109	0	0.15	0	71.34	14.75	21.31	0.000495696	9.35369	up
F02_cb17486_c0/f1p0/1062	0	0	0	22	49	30	0	0	0	2.38	4.09	2.54	4.24642e-07	Inf	up
F02_cb17487_c1/f1p0/661	0	0	0	27	54	45	0	0	0	6.14	9.09	7.7	5.86058e-11	Inf	up
F02_cb17619_c1/f3p1/575	0	0	0	141	121	111	0	0	0	41.99	26.23	24.36	8.48752e-26	Inf	up
F02_cb17619_c3/f1p0/616	0	0	0	74	48	103	0	0	0	19.28	9.2	19.93	3.81216e-17	Inf	up
F02_cb17619_c4/f1p1/647	0	0	0	95	120	112	0	0	0	24.43	22.73	21.65	2.89434e-23	Inf	up
F02_cb17619_c7/f1p0/482	0	0	0	64	50	35	0	0	0	28.3	15.28	11.07	1.60057e-11	Inf	up
F02_cb17762_c0/f1p0/957	0	0	0	56	79	130	0	0	0	7.01	7.57	12.63	1.55333e-17	Inf	up
F02_cb17765_c1/f1p1/375	2	4	0	137	267	217	0.87	2.07	0	132.59	157.8	130.55	1.22135e-15	7.2323	up
F02_cb1780_c3/f1p0/3970	29	58	0	103	58	94	0.41	0.85	0	2.33	1.04	1.7	0.0105673	2.08525	up
F02_cb17826_c2/f1p0/661	129	67	66	0	14	0	16.87	9.16	10.82	0	2.45	0	2.06775e-06	-3.61206	down
F02_cb17849_c0/f4p0/962	5	8	4	24	70	97	0.42	0.63	0.4	3.06	6.69	9.47	0.00260758	3.93976	up
F02_cb17906_c3/f1p0/1278	8	3	6	36	125	100	0.4	0.16	0.37	2.97	8.01	6.49	0.00236305	4.43472	up
F02_cb17919_c1/f1p0/1055	0	1	0	56	103	130	0	0.07	0	6.03	8.55	10.93	1.10097e-16	8.62944	up
F02_cb17952_c1/f1p0/561	3	0	6	28	17	20	0.52	0	1.3	8.49	3.76	4.47	0.0119965	3.29345	up
F02_cb17955_c0/f5p0/547	3	3	11	45	63	68	0.63	0.68	2.65	14.92	14.92	16.54	6.90017e-07	3.76965	up
F02_cb17964_c111/f1p0/825	8	11	2	322	321	50	0.83	1.19	0.26	57.53	43.08	6.87	0.0128198	5.64761	up
F02_cb17964_c127/f1p5/749	118	134	138	1000	953	366	12.51	14.9	18.29	183.23	131.13	51.26	0.0237798	3.09702	up
F02_cb17964_c32/f3p6/978	59	160	124	968	817	339	4.29	12.1	11.14	117.81	76.26	32.12	0.0250328	3.13217	up
F02_cb17974_c2/f1p0/1139	0	0	0	110	164	193	0	0	0	10.84	12.49	14.87	3.39512e-30	Inf	up
F02_cb17991_c3/f1p0/1273	0	0	0	35	62	51	0	0	0	2.97	4.09	3.4	1.77195e-12	Inf	up
F02_cb18047_c6/f1p0/1090	174	109	129	300	451	428	10.85	7.17	9.99	31.35	36.37	34.97	1.27039e-05	2.01495	up
F02_cb18065_c2/f3p1/915	1	2	7	125	53	69	0.08	0.17	0.69	16.79	5.52	7.16	0.000170107	5.03243	up
F02_cb18141_c1/f1p0/781	5	13	0	44	31	49	0.57	1.41	0	7.51	4.03	6.41	0.000285888	3.30125	up
F02_cb18149_c0/f1p0/525	0	0	0	32	61	40	0	0	0	11.91	15.84	10.57	3.01017e-10	Inf	up
F02_cb18155_c16/f3p25/7087	0	13	0	34	5184	5063	0	0.11	0	0.42	50.4	49.71	0.000619572	10.07	up
F02_cb18159_c1/f1p0/1031	1	2	0	33	43	35	0.07	0.14	0	3.76	3.77	3.15	1.27022e-07	5.75739	up
F02_cb18168_c3/f1p0/769	1	2	1	32	38	66	0.1	0.21	0.13	5.61	5.02	8.85	1.16469e-08	5.53365	up
F02_cb18176_c1/f3p0/947	4	1	2	128	256	292	0.3	0.08	0.19	16.31	24.96	28.87	4.16253e-16	7.10337	up
F02_cb18176_c22/f1p0/827	0	0	0	35	114	99	0	0	0	5.43	13.4	11.81	9.29104e-08	Inf	up
F02_cb18176_c4/f2p0/654	2	23	14	37	100	73	0.32	3.18	2.43	8.66	17.24	12.72	0.0207436	2.86168	up
F02_cb18176_c5/f2p0/715	45	41	27	169	302	328	5.18	5	3.85	33.61	44.75	49.33	1.04857e-09	3.31539	up
F02_cb18184_c0/f3p1/1194	52	224	57	364	620	398	2.87	12.97	3.92	33.6	44.41	28.83	0.00217384	2.54936	up
F02_cb18210_c16/f1p0/593	0	0	0	51	28	73	0	0	0	13.71	5.56	14.58	2.32262e-12	Inf	up
F02_cb1822_c32/f1p0/4173	3	13	16	156	67	123	0.05	0.18	0.26	3.32	1.14	2.09	3.23892e-05	3.85033	up
F02_cb1823_c8/f1p0/3391	21	13	19	47	31	76	0.37	0.24	0.41	1.31	0.68	1.68	0.0307136	1.98981	up
F02_cb18266_c1/f1p0/571	8	42	0	97	76	174	1.32	7.4	0	29.32	16.59	38.42	9.35315e-06	3.26265	up
F02_cb18296_c0/f1p0/948	5	5	6	90	129	122	0.38	0.39	0.56	11.45	12.56	12.04	8.47761e-15	4.88441	up
F02_cb18341_c0/f1p0/1153	1	0	0	52	35	50	0.06	0	0	5.06	2.66	3.87	1.04971e-10	7.75471	up
F02_cb18378_c0/f2p0/730	6	2	2	23	30	25	0.66	0.23	0.27	4.4	4.3	3.64	0.00310164	3.52285	up
F02_cb18428_c2/f1p0/775	58	110	100	228	115	208	5.57	11.08	12.01	37.68	14.36	26.44	0.0441958	1.48974	up
F02_cb18428_c6/f1p0/1026	36	149	162	231	174	237	2.45	10.59	13.59	26.26	15.26	20.99	0.015953	1.30642	up
F02_cb18429_c1/f1p0/959	0	4	5	167	232	277	0	0.31	0.46	20.89	22.23	26.91	7.42949e-31	6.60836	up
F02_cb1842_c13/f1p0/3622	15	12	21	82	75	82	0.23	0.2	0.4	2.02	1.48	1.62	2.66942e-05	2.78055	up
F02_cb1842_c20/f1p0/2800	0	0	0	73	87	108	0	0	0	2.53	2.38	2.99	9.69738e-20	Inf	up
F02_cb1842_c24/f1p1/2674	0	0	0	54	39	61	0	0	0	1.88	1.08	1.71	7.6267e-13	Inf	up
F02_cb18438_c0/f4p0/618	0	1	0	69	77	98	0	0.15	0	17.8	14.54	18.84	3.79231e-17	8.39834	up
F02_cb18438_c1/f1p0/490	6	2	2	28	35	54	1.35	0.47	0.56	11.98	10.39	16.39	1.85571e-05	4.06991	up
F02_cb18480_c5/f1p3/954	257	214	379	7313	11120	4351	19.41	16.96	35.58	934.63	1087.44	431.48	0.00423656	5.24592	up
F02_cb18502_c1/f1p0/729	0	2	0	86	30	40	0	0.23	0	16.49	4.31	5.83	0.000998569	6.79176	up
F02_cb18525_c2/f1p0/477	6	5	2	23	22	26	1.42	1.25	0.59	10.49	6.9	8.34	0.0240223	2.98007	up
F02_cb18538_c0/f2p0/553	0	0	0	19	17	35	0	0	0	6.14	3.94	8.27	1.38176e-06	Inf	up
F02_cb18541_c0/f1p0/767	0	3	0	36	60	67	0	0.32	0	6.44	8.05	9.02	7.10201e-11	6.22879	up
F02_cb18577_c1/f1p0/1061	16	7	10	151	127	223	1.02	0.53	0.8	16.21	10.56	18.72	1.17529e-16	4.41272	up
F02_cb18622_c1/f1p0/1131	0	0	0	69	64	62	0	0	0	6.85	4.97	4.84	1.87419e-15	Inf	up
F02_cb18648_c0/f1p0/754	0	0	0	15	19	23	0	0	0	2.72	2.59	3.18	2.40599e-05	Inf	up
F02_cb18652_c1/f1p0/1174	0	0	0	33	53	61	0	0	0	3.12	3.87	4.52	2.26435e-12	Inf	up
F02_cb18687_c0/f1p0/567	0	0	0	20	26	17	0	0	0	6.04	5.68	3.8	5.87945e-06	Inf	up
F02_cb18721_c0/f1p0/1210	0	0	0	304	284	371	0	0	0	30.76	22.18	29.31	2.4875e-45	Inf	up
F02_cb18734_c2/f1p0/872	0	0	17	182	72	113	0	0	1.82	26.21	7.89	12.63	0.000129855	4.77024	up
F02_cb18736_c1/f1p0/720	0	0	0	15	46	33	0	0	0	2.94	6.73	4.91	1.45886e-05	Inf	up
F02_cb1876_c29/f3p1/3269	106	129	87	4	16	3	1.82	2.32	1.86	0.12	0.36	0.07	2.18089e-06	-3.25728	down
F02_cb18774_c3/f1p1/5327	0	0	0	1874	2105	3442	0	0	0	30.96	27.69	45.72	2.30032e-37	Inf	up
F02_cb18824_c0/f1p0/769	29	50	14	83	91	136	2.98	5.33	1.87	14.65	12.03	18.27	0.000249121	2.22278	up
F02_cb18824_c3/f1p0/808	85	52	93	163	160	234	8.07	5.24	10.95	26.5	19.72	29.21	0.000538013	1.73492	up
F02_cb18957_c0/f3p0/496	22	0	0	22	40	38	5.01	0	0	9.48	11.59	11.27	0.0120518	2.83696	up
F02_cb18984_c1/f1p1/978	24	36	26	44	68	122	1.77	2.72	2.33	5.36	6.43	11.6	0.0356434	1.87671	up
F02_cb18997_c0/f2p0/932	258	234	210	38	66	40	19.87	18.88	20.1	5.06	6.67	4.11	0.000668613	-1.77174	down
F02_cb19041_c0/f1p0/943	0	1	0	53	92	64	0	0.08	0	6.75	8.97	6.33	1.51179e-13	8.20038	up
F02_cb19041_c3/f1p0/1008	21	23	17	427	334	431	1.47	1.68	1.5	49.91	29.96	39.18	7.28013e-25	4.77938	up
F02_cb19118_c0/f1p0/1231	350	323	382	106	62	127	21.49	20.81	29.2	10.92	4.93	10.26	0.0166879	-1.3818	down
F02_cb19165_c1/f2p1/786	0	0	1	118	196	230	0	0	0.12	20.02	25.11	29.9	1.8433e-28	9.39461	up
F02_cb19165_c10/f1p1/880	0	0	0	20	30	41	0	0	0	2.87	3.26	4.5	2.88743e-08	Inf	up
F02_cb19165_c11/f1p1/607	0	0	0	75	165	138	0	0	0	20.23	32.21	27.52	2.17339e-14	Inf	up
F02_cb19165_c12/f1p0/907	7	10	10	167	308	253	0.63	0.85	1.09	22.71	31.85	26.59	2.56836e-13	5.21825	up
F02_cb19165_c3/f2p0/783	323	328	351	560	912	1031	32	34.06	43.27	95.58	117.25	134.54	0.00130383	1.78268	up
F02_cb19165_c8/f1p0/865	1	2	0	92	94	134	0.09	0.18	0	13.41	10.42	15.07	1.06726e-19	7.25725	up
F02_cb19165_c9/f1p0/949	21	8	10	77	96	92	1.63	0.67	0.93	9.89	9.36	9.11	3.58516e-07	3.29633	up
F02_cb19167_c0/f2p0/458	4	18	5	31	38	28	1	4.76	1.57	15.11	12.63	9.52	0.0445302	2.33746	up
F02_cb19196_c12/f1p0/870	8	5	8	38	18	65	0.77	0.55	1.02	6.12	2.18	7.95	0.0150894	2.95923	up
F02_cb1922_c1/f1p1/3551	0	72	0	83	108	93	0	1.22	0	2.2	2.27	1.97	0.000867353	2.46725	up
F02_cb19266_c135/f1p0/1256	105	94	101	154	187	231	5.49	5.15	6.56	13.34	12.6	15.74	0.0124708	1.40205	up
F02_cb19266_c147/f1p0/496	6	24	8	51	63	33	1.51	5.6	2.28	21.23	18.12	9.95	0.00921035	2.45852	up
F02_cb19266_c149/f1p0/432	10	43	33	85	183	108	3.07	13.76	12.41	51.98	73.35	44.43	0.0266577	2.58389	up
F02_cb19266_c213/f7p1/493	1	34	7	136	126	96	0.3	8.01	2.14	57.51	37.05	29.03	5.34076e-10	3.57162	up
F02_cb19299_c0/f2p0/1140	61	175	69	454	354	213	3.58	10.79	5.04	44.63	26.94	16.41	0.0437927	2.25859	up
F02_cb19322_c0/f1p0/1116	0	0	0	227	225	209	0	0	0	22.95	17.57	16.53	2.29838e-38	Inf	up
F02_cb19422_c1/f1p0/551	4	3	5	25	30	38	0.68	0.54	1.07	8.07	6.85	8.76	0.00106078	3.40808	up
F02_cb1945_c16/f1p0/1941	0	0	0	43	32	68	0	0	0	2.19	1.28	2.73	4.55361e-12	Inf	up
F02_cb19499_c0/f1p0/864	5	2	6	51	33	34	0.43	0.18	0.64	7.54	3.66	3.82	7.01884e-05	3.66961	up
F02_cb19505_c0/f1p0/909	0	0	0	54	28	64	0	0	0	7.26	2.89	6.64	2.71475e-12	Inf	up
F02_cb19519_c0/f1p0/950	1	5	4	30	77	40	0.07	0.39	0.37	3.8	7.47	3.94	0.00566785	4.33204	up
F02_cb19519_c1/f1p0/552	0	0	1	14	33	22	0	0	0.22	4.54	7.67	5.22	1.29285e-05	6.44346	up
F02_cb19524_c0/f2p0/526	0	0	0	43	65	97	0	0	0	15.53	16.63	25.33	6.07563e-16	Inf	up
F02_cb19526_c0/f1p0/800	0	3	0	43	62	74	0	0.3	0	7.07	7.7	9.33	8.21027e-12	6.36325	up
F02_cb19526_c1/f1p0/933	11	3	9	66	112	103	0.84	0.24	0.86	8.59	11.15	10.4	2.39977e-10	4.10462	up
F02_cb19580_c1/f2p1/382	0	0	0	15	18	24	0	0	0	13.68	10.13	13.77	2.43649e-05	Inf	up
F02_cb19623_c0/f2p0/629	0	0	1	140	123	240	0	0	0.17	34.92	22.53	44.74	3.9892e-28	9.26686	up
F02_cb19680_c121/f1p24/6089	0	0	1	3051	4368	7926	0	0	0.02	44.22	50.42	92.38	6.66164e-21	14.1871	up
F02_cb19680_c144/f1p21/5958	0	0	0	82	214	198	0	0	0	1.21	2.5	2.33	2.00242e-12	Inf	up
F02_cb19680_c151/f1p0/5675	0	0	0	865	474	427	0	0	0	14.41	6.29	5.72	5.79919e-14	Inf	up
F02_cb19680_c29/f1p11/5829	0	0	0	110	225	889	0	0	0	1.65	2.69	10.71	0.00143836	Inf	up
F02_cb19680_c33/f1p12/5907	0	0	0	162	216	69	0	0	0	2.39	2.55	0.83	8.15606e-08	Inf	up
F02_cb19680_c59/f1p13/4864	0	0	0	101	234	254	0	0	0	1.85	3.38	3.71	1.4505e-15	Inf	up
F02_cb19680_c74/f1p46/6052	0	3	0	1528	641	42	0	0.03	0	22.25	7.44	0.49	0.0159524	10.0928	up
F02_cb19697_c0/f1p0/5054	0	0	0	85	84	274	0	0	0	1.47	1.15	3.8	1.88004e-06	Inf	up
F02_cb19741_c0/f1p0/5013	29	23	21	209	157	374	0.32	0.26	0.29	3.68	2.2	5.28	8.07755e-08	3.80107	up
F02_cb19741_c1/f1p0/4808	25	21	20	218	248	364	0.29	0.26	0.28	4.03	3.64	5.4	3.63484e-19	4.12461	up
F02_cb19741_c54/f1p0/6934	322	259	319	464	415	671	2.69	2.27	3.31	6.26	4.47	7.3	0.0463538	1.24586	up
F02_cb19762_c3/f1p0/5137	0	4	17	5120	10479	26504	0	0.06	0.26	98.97	161.05	411.45	0.0015324	11.2477	up
F02_cb19765_c1/f1p0/4826	13	13	12	51	51	35	0.15	0.16	0.17	0.94	0.74	0.52	0.011581	2.36265	up
F02_cb2025_c26/f1p0/3054	17	15	23	101	84	94	0.32	0.31	0.54	3.05	2.02	2.28	5.05663e-06	2.81161	up
F02_cb2037_c10/f1p0/2840	89	69	91	335	244	366	1.79	1.45	2.27	10.9	6.28	9.5	5.19438e-08	2.39622	up
F02_cb2058_c122/f1p0/2530	0	0	0	117	142	251	0	0	0	4.35	4.16	7.44	3.99568e-23	Inf	up
F02_cb2107_c2/f3p0/2964	18	8	12	147	107	132	0.34	0.16	0.28	4.56	2.63	3.28	9.28426e-12	3.85669	up
F02_cb2113_c4/f2p1/2424	201	140	176	291	395	343	4.8	3.51	5.21	11.35	12.14	10.66	0.00466502	1.48881	up
F02_cb2127_c39/f1p0/2436	22	80	0	116	157	145	0.54	2.06	0	4.67	4.97	4.64	1.68445e-06	2.55399	up
F02_cb2141_c0/f1p0/3510	1	13	2	41	28	43	0.03	0.23	0.06	1.07	0.59	0.89	0.000519888	3.26993	up
F02_cb2162_c22/f1p0/3641	0	0	0	41	49	37	0	0	0	1.03	0.98	0.74	4.60373e-11	Inf	up
F02_cb2162_c25/f1p0/3916	19	40	20	77	46	103	0.28	0.6	0.35	1.77	0.85	1.89	0.00712424	1.9686	up
F02_cb2162_c32/f1p0/3053	65	27	46	96	76	110	1.22	0.53	1.06	2.9	1.83	2.65	0.0489112	1.52693	up
F02_cb2165_c5/f1p1/3318	10	22	9	47	44	57	0.18	0.4	0.21	1.34	1	1.3	0.00834686	2.32922	up
F02_cb2178_c6/f1p0/3412	23	65	53	185	120	145	0.38	1.13	1.09	4.94	2.54	3.1	3.23892e-05	2.12963	up
F02_cb2179_c7/f1p0/2287	5	1	6	17	36	50	0.13	0.04	0.19	0.71	1.18	1.65	0.000308681	3.53493	up
F02_cb2193_c29/f1p1/3237	0	26	0	60	63	81	0	0.48	0	1.69	1.4	1.83	1.58986e-06	3.44083	up
F02_cb2193_c35/f1p1/3295	143	67	70	7	0	0	2.45	1.21	1.49	0.22	0	0	4.00436e-08	-4.70367	down
F02_cb2195_c25/f1p0/1737	3	1	4	60	72	67	0.11	0.04	0.18	3.69	3.47	3.23	1.50711e-10	5.10326	up
F02_cb2195_c6/f1p0/2281	8	14	6	77	82	126	0.23	0.38	0.22	3.25	2.71	4.21	1.58584e-09	3.81734	up
F02_cb2222_c7/f1p0/2939	25	46	45	133	108	116	0.52	0.98	1.14	4.37	2.8	3.06	0.00024602	2.08317	up
F02_cb2267_c0/f2p0/1256	24	21	37	82	96	114	1.26	1.14	2.43	7.16	6.45	7.76	0.000180106	2.27872	up
F02_cb2282_c15/f1p0/2200	42	40	35	97	76	94	1.14	1.13	1.16	4.24	2.64	3.27	0.0233937	1.68295	up
F02_cb2308_c26/f1p0/1894	94	37	32	98	80	165	2.99	1.25	1.29	5.11	3.26	6.82	0.0195593	1.58605	up
F02_cb2383_c6/f1p0/7160	68	52	36	131	168	200	0.54	0.43	0.36	1.67	1.7	2.04	1.54707e-05	2.18152	up
F02_cb242_c5/f1p0/4605	67	21	25	171	139	269	0.83	0.28	0.39	3.4	2.2	4.27	1.826e-09	2.87305	up
F02_cb246_c2/f2p0/2809	149	205	179	44	63	34	3.03	4.35	4.52	1.47	1.66	0.92	0.032913	-1.416	down
F02_cb2529_c5/f1p0/2423	35	0	0	28	61	77	0.84	0	0	1.12	1.9	2.42	0.0138634	2.87561	up
F02_cb2612_c10/f1p0/1676	39	79	74	0	0	0	1.44	3.01	3.34	0	0	0	1.91441e-08	#NAME?	down
F02_cb2628_c10/f1p2/2011	8	6	8	141	135	193	0.26	0.19	0.32	6.82	5.14	7.43	3.28826e-18	4.88086	up
F02_cb2628_c13/f1p1/2111	0	0	0	44	58	69	0	0	0	2.04	2.11	2.54	6.37254e-14	Inf	up
F02_cb2628_c20/f1p0/1492	1	2	0	49	93	93	0.04	0.09	0	3.43	5.06	5.09	5.36532e-15	6.81797	up
F02_cb2628_c26/f1p0/1285	1	1	4	69	72	145	0.05	0.05	0.25	5.83	4.73	9.58	4.22282e-13	5.93526	up
F02_cb2628_c8/f1p2/2011	11	17	7	70	71	111	0.32	0.52	0.26	3.43	2.73	4.28	3.74897e-07	3.32555	up
F02_cb2667_c17/f1p0/2765	0	0	0	265	305	490	0	0	0	8.89	8.1	13.16	1.15626e-44	Inf	up
F02_cb2684_c3/f1p0/2985	3	0	0	134	135	126	0.06	0	0	4.13	3.31	3.13	1.03058e-23	7.70963	up
F02_cb286_c9/f1p1/4266	138	133	59	1384	807	1284	1.78	1.79	0.95	28.86	13.37	21.49	1.79338e-13	3.91465	up
F02_cb2970_c19/f1p1/2816	7	31	2	116	237	103	0.16	0.68	0.07	3.9	6.33	2.77	0.00669534	4.04654	up
F02_cb3080_c0/f1p0/3218	26	34	26	111	117	152	0.45	0.63	0.56	3.14	2.62	3.44	1.46941e-06	2.61321	up
F02_cb3080_c1/f1p0/2567	0	8	0	38	42	83	0	0.19	0.02	1.39	1.21	2.41	1.47524e-08	4.78707	up
F02_cb3107_c132/f1p0/2622	94	80	85	236	278	417	2.06	1.84	2.31	8.42	7.83	11.88	1.44693e-07	2.30849	up
F02_cb3107_c172/f1p0/3024	510	369	228	3982	2621	5086	9.91	7.51	5.51	125.91	65.62	128.65	5.10657e-05	3.90372	up
F02_cb3107_c214/f1p0/2917	18	30	13	797	463	791	0.36	0.61	0.32	24.97	11.48	19.82	7.1077e-22	5.55835	up
F02_cb3107_c222/f1p1/2656	0	6	15	49	39	33	0	0.16	0.4	1.73	1.08	0.93	0.000997939	2.91634	up
F02_cb3107_c245/f1p0/1829	165	336	252	729	1019	1407	5.43	11.57	10.33	39.43	43.26	60.43	1.30179e-06	2.50489	up
F02_cb3107_c51/f2p1/1801	2	2	0	19	33	19	0.08	0.08	0	1.06	1.43	0.84	0.000240619	4.73975	up
F02_cb3165_c59/f1p0/2839	0	0	0	50	77	84	0	0	0	1.71	2.08	2.29	2.3035e-16	Inf	up
F02_cb3205_c1/f1p0/2051	149	161	128	34	20	18	4.36	4.92	4.65	1.64	0.76	0.69	0.000642591	-2.08726	down
F02_cb3227_c13/f1p0/1940	0	0	0	27	19	26	0	0	0	1.41	0.79	1.07	1.00719e-06	Inf	up
F02_cb3301_c0/f1p0/3165	14	11	7	30	37	52	0.25	0.2	0.15	0.87	0.85	1.2	0.0174128	2.39136	up
F02_cb3355_c1/f1p0/1824	0	0	0	98	62	93	0	0	0	5.33	2.64	4.02	6.90526e-19	Inf	up
F02_cb3355_c4/f1p0/1338	0	0	0	61	135	147	0	0	0	4.89	8.42	9.26	1.1288e-14	Inf	up
F02_cb3393_c8/f1p0/2574	0	0	0	165	122	144	0	0	0	6	3.53	4.18	1.27821e-28	Inf	up
F02_cb3471_c9/f1p0/2782	0	37	0	32	40	51	0	0.72	0	0.96	0.96	1.24	0.0293384	2.19715	up
F02_cb3539_c7/f1p0/3561	1	6	4	21	32	55	0.02	0.1	0.08	0.53	0.64	1.12	0.000103246	3.69034	up
F02_cb353_c1/f1p0/4500	10	4	1	34	31	38	0.12	0.06	0.02	0.69	0.5	0.61	0.0010298	3.3612	up
F02_cb3570_c5/f2p2/2657	0	33	0	47	106	160	0	0.75	0	1.68	2.95	4.5	0.00109793	3.68335	up
F02_cb3597_c9/f1p0/2703	0	64	62	148	85	115	0	1.42	1.64	5.13	2.34	3.18	0.0203207	1.8742	up
F02_cb3629_c2/f2p0/2752	442	281	297	115	41	106	9.15	6.09	7.66	3.89	1.12	2.87	0.00603877	-1.4683	down
F02_cb3732_c4/f1p0/1618	41	32	26	90	80	125	1.58	1.29	1.26	5.69	3.97	6.24	0.00113829	2.06403	up
F02_cb3732_c7/f1p0/690	0	0	0	73	107	60	0	0	0	15.4	16.81	9.65	6.00235e-13	Inf	up
F02_cb3769_c19/f1p0/863	65	285	137	1585	1769	1974	5.53	25.44	14.52	230.28	195.47	221.31	1.20286e-10	3.90431	up
F02_cb3847_c27/f1p2/2502	98	133	147	0	32	0	2.27	3.21	4.21	0	0.96	0	0.000101804	-3.01036	down
F02_cb3852_c11/f1p0/1086	96	136	159	238	229	217	6.09	9	12.43	25.18	18.66	17.93	0.029377	1.27218	up
F02_cb3861_c4/f1p0/2083	14	0	2	17	31	29	0.45	0	0.09	0.88	1.29	1.22	0.0288787	2.87401	up
F02_cb3905_c6/f1p0/2792	5	6	11	106	50	93	0.11	0.13	0.29	3.52	1.31	2.48	6.03983e-07	3.93312	up
F02_cb3933_c6/f1p0/3046	11	6	23	133	122	128	0.23	0.14	0.58	4.23	3.09	3.27	2.37861e-11	3.69816	up
F02_cb3938_c8/f1p0/2521	14	0	0	26	62	52	0.32	0	0	0.98	1.81	1.55	0.000185164	3.97673	up
F02_cb3998_c1/f1p0/1453	5	2	2	69	34	62	0.22	0.11	0.11	4.97	1.93	3.51	2.22807e-08	4.72954	up
F02_cb3998_c2/f1p0/2137	5	5	3	46	28	41	0.14	0.17	0.11	2.18	1.05	1.56	0.000105196	3.65221	up
F02_cb4041_c3/f1p0/1711	0	0	0	47	32	79	0	0	0	2.75	1.47	3.67	4.88043e-13	Inf	up
F02_cb4048_c38/f1p0/2479	0	0	0	369	660	734	0	0	0	14.63	20.61	23.2	6.47953e-34	Inf	up
F02_cb4078_c0/f1p0/2981	0	0	2	96	53	154	0	0	0.07	2.97	1.31	3.8	8.28948e-11	7.52714	up
F02_cb4095_c19/f1p0/2736	13	6	8	116	108	171	0.28	0.14	0.21	4.04	2.97	4.75	4.14046e-14	4.36311	up
F02_cb4095_c24/f1p0/2665	18	12	10	487	350	441	0.39	0.29	0.28	16.91	9.6	12.24	7.42289e-30	5.51599	up
F02_cb4095_c3/f3p2/2610	0	0	0	331	314	346	0	0	0	11.87	8.9	9.92	7.43606e-46	Inf	up
F02_cb4189_c14/f1p2/2579	32	6	0	63	46	48	0.74	0.15	0	2.32	1.35	1.43	0.00239638	2.68932	up
F02_cb420_c1/f1p0/4442	0	9	0	53	23	59	0	0.12	0	1.07	0.37	0.96	4.82756e-06	4.36503	up
F02_cb4270_c3/f1p0/2063	24	15	13	83	89	102	0.71	0.47	0.48	3.92	3.29	3.83	4.1171e-06	2.91051	up
F02_cb4274_c16/f1p0/2096	207	304	234	413	437	779	5.82	8.96	8.2	19.01	15.86	28.56	0.00203433	1.57104	up
F02_cb4277_c12/f1p0/2715	161	102	81	344	231	219	3.63	2.4	2.28	12.61	6.7	6.42	0.0137482	1.74888	up
F02_cb42_c16/f1p2/2940	1	1	0	147	346	910	0.02	0.02	0	4.63	8.61	22.81	6.02396e-05	9.94055	up
F02_cb42_c30/f1p1/4628	0	0	0	421	1977	457	0	0	0	8.06	30.07	7.02	0.00113829	Inf	up
F02_cb42_c31/f1p3/3884	0	1	0	17	982	509	0	0.02	0	0.41	18.01	9.43	0.0113944	11.0429	up
F02_cb42_c35/f1p1/3953	1	0	0	1324	2837	1359	0.03	0	0	30.67	52.19	25.27	4.48843e-13	13.1184	up
F02_cb42_c61/f1p0/6830	8	8	22	13103	4474	3596	0.07	0.07	0.23	171.42	46.65	37.87	0.000164998	9.59301	up
F02_cb430_c3/f1p0/6512	4	1	0	438	602	348	0.03	0.01	0	6	6.58	3.84	1.6238e-18	8.76604	up
F02_cb4349_c26/f1p1/2444	24	0	25	40	56	67	0.58	0	0.76	1.59	1.72	2.09	0.00980545	2.19827	up
F02_cb4438_c8/f1p2/1558	103	56	78	20	14	8	4.1	2.37	3.87	1.32	0.74	0.42	0.027772	-1.95335	down
F02_cb4496_c2/f1p0/2308	5	10	5	36	42	59	0.14	0.29	0.19	1.58	1.42	2.04	0.000148014	3.23716	up
F02_cb4500_c1/f1p0/1615	31	26	8	71	56	111	1.2	1.05	0.39	4.47	2.78	5.51	0.000590737	2.3841	up
F02_cb4518_c1/f4p2/535	0	1	1	701	732	559	0	0.2	0.24	243.88	181.09	141.31	6.74821e-45	10.3804	up
F02_cb4518_c5/f1p0/2097	0	0	0	49	39	45	0	0	0	2.28	1.44	1.65	1.8462e-11	Inf	up
F02_cb4529_c12/f1p0/2397	0	0	17	25	38	38	0	0	0.51	0.98	1.19	1.2	0.00251832	2.89044	up
F02_cb4529_c5/f1p0/1647	0	0	0	57	56	66	0	0	0	3.53	2.72	3.25	1.89607e-14	Inf	up
F02_cb453_c4/f1p0/4815	39	0	24	68	95	90	0.48	0	0.37	1.34	1.47	1.41	0.000149553	2.52832	up
F02_cb4639_c2/f2p1/1141	89	97	59	14	16	17	5.25	6.01	4.35	1.41	1.22	1.32	0.0432206	-1.88168	down
F02_cb4648_c5/f1p0/2766	108	29	31	180	167	151	2.24	0.64	0.81	6.06	4.44	4.06	4.90224e-05	2.14196	up
F02_cb4681_c5/f1p0/2583	15	6	0	22	36	49	0.35	0.15	0	0.83	1.08	1.47	0.00459729	2.92714	up
F02_cb4791_c2/f2p0/2669	61	62	25	131	137	147	1.31	1.41	0.68	4.61	3.78	4.11	0.000310031	2.01032	up
F02_cb480_c4/f4p0/3916	166	160	80	490	394	492	2.34	2.37	1.41	11.22	7.16	9.04	6.61667e-07	2.27759	up
F02_cb480_c43/f1p0/2926	276	292	301	106	32	119	5.35	5.93	7.26	3.37	0.8	3	0.0395198	-1.30953	down
F02_cb4838_c10/f1p0/1772	22	8	5	65	206	217	0.79	0.32	0.23	3.84	9.54	10.15	0.000494245	4.34235	up
F02_cb4912_c18/f1p0/1818	51	32	0	50	109	104	1.7	1.12	0	2.73	4.66	4.49	0.022269	2.24051	up
F02_cb4942_c3/f2p2/2346	81	102	71	0	0	0	2.01	2.66	2.19	0.03	0	0	8.43869e-13	#NAME?	down
F02_cb4948_c0/f1p0/2801	19	16	23	96	89	129	0.4	0.34	0.59	3.18	2.35	3.43	7.33223e-07	2.89226	up
F02_cb4969_c2/f1p0/1525	9	11	24	72	80	86	0.37	0.47	1.23	4.9	4.22	4.63	1.19941e-05	2.8602	up
F02_cb4969_c3/f1p0/1414	48	24	47	195	201	273	2.23	1.15	2.71	14.8	11.92	16.33	8.48513e-11	2.96039	up
F02_cb49_c26/f1p0/4135	20	21	25	0	0	0	0.29	0.31	0.44	0	0	0	0.000925644	#NAME?	down
F02_cb5020_c13/f1p0/2749	147	54	58	266	267	529	3.14	1.22	1.56	9.23	7.34	14.67	2.03948e-05	2.53746	up
F02_cb5020_c21/f1p0/2463	62	0	89	161	182	183	1.45	0	2.58	6.14	5.47	5.56	2.85435e-06	2.2557	up
F02_cb5020_c30/f1p1/2530	0	0	0	18	19	39	0	0	0	0.69	0.57	1.18	5.29737e-07	Inf	up
F02_cb5033_c0/f3p0/2606	0	20	6	89	100	76	0	0.46	0.16	3.2	2.86	2.19	3.94359e-09	3.81042	up
F02_cb5033_c3/f1p0/2601	3	0	0	65	45	63	0.07	0	0	2.36	1.28	1.82	1.73953e-11	6.50656	up
F02_cb5064_c14/f1p0/2197	0	12	0	42	23	24	0	0.33	0	1.85	0.81	0.86	0.00286323	3.39359	up
F02_cb5085_c1/f2p0/2206	179	48	199	267	205	294	4.77	1.34	6.57	11.62	7.03	10.17	0.0186405	1.31346	up
F02_cb5085_c4/f1p0/1682	301	252	291	462	559	532	10.94	9.58	13.13	27.64	26.22	25.25	0.0223366	1.36695	up
F02_cb5085_c6/f1p0/1718	55	85	154	148	254	214	1.96	3.15	6.77	8.65	11.62	9.89	0.042574	1.49617	up
F02_cb5097_c7/f1p0/2697	349	395	179	80	78	64	7.39	8.77	4.73	2.79	2.14	1.79	0.0186705	-1.52554	down
F02_cb5125_c1/f2p0/2599	10	4	20	80	30	58	0.22	0.09	0.56	2.9	0.85	1.67	0.0293194	2.74193	up
F02_cb5141_c4/f2p1/2269	101	40	75	248	211	341	2.6	1.09	2.4	10.43	7.01	11.43	1.16261e-07	2.37221	up
F02_cb5146_c3/f8p1/2108	157	143	195	2386	3233	1039	4.4	4.21	6.77	109.13	116.44	37.86	0.00344088	4.27099	up
F02_cb5161_c28/f1p1/2709	27	22	23	0	3	0	0.58	0.5	0.61	0	0.09	0	0.0159757	-4.00233	down
F02_cb5239_c9/f1p0/2280	94	161	126	0	0	1	2.41	4.29	3.98	0	0	0.05	8.40518e-15	-8.28932	down
F02_cb5249_c12/f1p0/2653	41	21	31	104	98	60	0.94	0.51	0.86	3.81	2.84	1.76	0.00898328	2.02764	up
F02_cb5269_c2/f1p0/2538	81	85	49	0	0	17	1.84	2.03	1.38	0	0	0.52	0.000204973	-3.33752	down
F02_cb5298_c2/f1p0/2327	71	51	92	239	188	329	1.79	1.34	2.85	9.75	6.03	10.7	3.49626e-07	2.26512	up
F02_cb5298_c5/f1p0/1190	0	1	0	28	30	56	0	0.06	0	2.6	2.15	4.07	4.7041e-09	7.27616	up
F02_cb5300_c6/f1p0/2729	20	13	28	134	80	212	0.46	0.31	0.78	4.9	2.31	6.18	1.95811e-05	3.22596	up
F02_cb5300_c9/f1p0/1504	332	422	279	884	870	1369	15.84	21.08	16.58	70.01	53.67	85.45	0.000231709	2.06387	up
F02_cb5386_c0/f1p1/2712	14	28	15	133	63	105	0.29	0.62	0.4	4.56	1.72	2.9	0.000332184	2.881	up
F02_cb5386_c2/f1p0/2640	0	17	2	69	56	114	0	0.41	0.08	2.47	1.58	3.22	2.81443e-09	4.08305	up
F02_cb5434_c2/f1p0/3352	53	60	52	282	227	371	0.88	1.04	1.07	7.56	4.83	7.97	4.73476e-11	2.87995	up
F02_cb5434_c3/f1p0/1996	31	25	30	222	147	208	0.92	0.78	1.1	10.6	5.52	7.92	1.33207e-11	3.22865	up
F02_cb5450_c15/f1p2/2206	0	6	0	235	187	164	0	0.17	0	10.2	6.42	5.67	1.5305e-23	7.10988	up
F02_cb5450_c2/f9p1/2057	83	50	76	420	171	283	2.41	1.52	2.73	19.77	6.35	10.63	0.0288416	2.56023	up
F02_cb5459_c1/f1p0/2627	3	11	2	218	216	237	0.07	0.25	0.05	7.76	6.08	6.74	2.17664e-27	5.882	up
F02_cb5507_c0/f8p1/2573	52	53	53	135	108	177	1.16	1.25	1.48	4.94	3.11	5.15	0.000573616	1.87344	up
F02_cb5599_c8/f1p2/2757	0	0	33	60	58	42	0	0	0.87	2.03	1.57	1.14	0.00108156	2.62745	up
F02_cb5641_c18/f11p3/1791	0	55	104	351	193	311	0	1.96	4.37	19.47	8.4	13.72	5.63347e-06	2.80171	up
F02_cb5642_c28/f1p0/1639	49	25	0	47	71	72	1.84	1	0	2.93	3.46	3.57	0.0342763	1.95019	up
F02_cb5646_c16/f1p0/2147	81	315	390	359	671	760	2.21	9	13.21	16.05	23.58	27.03	0.040884	1.58641	up
F02_cb5652_c3/f1p0/1512	9	7	8	34	35	40	0.38	0.31	0.43	2.32	1.86	2.16	0.00787273	2.66892	up
F02_cb5695_c39/f1p0/2898	57	0	50	329	240	307	1.2	0	1.33	11.29	6.53	8.41	3.71499e-15	3.52821	up
F02_cb5723_c41/f1p0/3067	25	68	20	0	0	0	0.47	1.31	0.46	0	0	0	0.00913274	#NAME?	down
F02_cb5758_c3/f2p0/2591	56	56	64	110	136	130	1.24	1.3	1.76	3.98	3.9	3.76	0.0120518	1.57196	up
F02_cb5852_c0/f1p0/2626	5	2	9	93	70	177	0.12	0.05	0.24	3.32	1.99	5.05	3.01106e-08	4.80595	up
F02_cb5852_c1/f1p0/2103	2	0	0	34	43	83	0.07	0	0	1.58	1.56	3.03	2.7372e-10	6.9368	up
F02_cb5853_c4/f1p0/1804	0	1	0	40	37	46	0	0.03	0	2.2	1.6	2.01	9.54161e-10	7.41757	up
F02_cb5883_c2/f1p0/1760	2	0	1	200	205	695	0.07	0	0.07	11.33	9.11	31.23	9.87574e-06	8.98165	up
F02_cb5883_c4/f1p0/2293	0	2	0	397	428	494	0	0.05	0.01	16.48	14.01	16.37	6.66744e-47	9.84012	up
F02_cb5883_c5/f1p0/1463	0	0	0	217	206	348	0	0	0	15.41	11.45	19.57	1.85291e-41	Inf	up
F02_cb5943_c4/f1p0/2256	12	18	23	77	58	45	0.32	0.5	0.76	3.28	1.94	1.53	0.00517853	2.23952	up
F02_cb599_c8/f1p1/2508	4	2	0	63	66	88	0.11	0.07	0	2.38	1.97	2.64	2.64634e-12	5.76009	up
F02_cb6104_c36/f1p0/627	3	3	13	27	34	18	0.43	0.46	2.31	6.92	6.32	3.47	0.0468363	2.48679	up
F02_cb6183_c13/f1p0/1342	46	41	41	124	94	165	2.2	2.1	2.47	9.87	5.82	10.31	0.00022716	2.04924	up
F02_cb623_c7/f1p0/3615	0	0	0	42	78	68	0	0	0	1.1	1.59	1.4	5.31291e-15	Inf	up
F02_cb6255_c3/f1p0/2133	0	0	13	103	66	23	0	0	0.45	4.66	2.35	0.83	0.0492696	4.2715	up
F02_cb6255_c6/f1p0/2484	15	5	2	394	263	315	0.35	0.12	0.06	14.92	7.86	9.52	1.7746e-24	6.05747	up
F02_cb6255_c7/f1p1/2344	0	5	0	23	20	26	0	0.15	0	0.96	0.66	0.87	0.000767669	4.2609	up
F02_cb6291_c13/f1p0/2426	83	78	58	0	0	0	1.99	1.96	1.72	0	0	0	2.52544e-11	#NAME?	down
F02_cb629_c45/f1p0/2864	20	15	20	64	75	104	0.4	0.31	0.5	2.06	1.91	2.69	8.01618e-05	2.60583	up
F02_cb6307_c12/f1p0/2217	50	31	20	184	108	174	1.33	0.88	0.68	7.94	3.67	6	1.01218e-07	2.73325	up
F02_cb6349_c1/f1p0/2548	0	23	0	26	32	39	0	0.54	0	0.96	0.93	1.15	0.0201184	2.54383	up
F02_cb6361_c3/f1p0/2373	21	0	0	26	33	34	0.53	0	0	1.07	1.04	1.11	0.0190866	2.80328	up
F02_cb6389_c9/f1p0/1647	18	34	0	91	438	347	0.7	1.34	0	5.6	21.07	16.89	0.0145981	4.60283	up
F02_cb6408_c9/f1p0/2280	15	13	8	57	205	152	0.4	0.36	0.26	2.39	6.76	5.07	0.0102982	4.03462	up
F02_cb6495_c7/f1p0/2006	57	98	27	106	119	122	1.74	3.09	1.01	5.24	4.6	4.81	0.0477268	1.44085	up
F02_cb6581_c9/f1p0/4007	60	38	32	171	140	229	0.82	0.55	0.54	3.8	2.47	4.08	1.34718e-07	2.5541	up
F02_cb6644_c1/f1p0/2498	0	0	0	69	42	93	0	0	0	2.59	1.27	2.79	6.72627e-16	Inf	up
F02_cb6644_c2/f1p0/1958	5	10	4	52	108	127	0.15	0.32	0.15	2.63	4.23	5.06	4.02233e-08	4.38346	up
F02_cb6644_c3/f1p0/2064	10	103	3	137	108	138	0.29	3.09	0.11	6.44	4.01	5.15	0.000825593	2.21229	up
F02_cb664_c13/f1p0/3673	183	157	195	316	284	328	2.83	2.53	3.73	7.91	5.64	6.59	0.0284801	1.27325	up
F02_cb6659_c11/f1p3/1565	14	41	4	105	79	69	0.59	1.7	0.2	6.88	4.05	3.61	0.000139297	2.63152	up
F02_cb6659_c13/f1p0/1492	3	0	2	25	29	55	0.13	0	0.1	1.77	1.61	3.05	1.62676e-06	4.92208	up
F02_cb6662_c6/f1p0/1955	350	263	336	130	82	74	10.68	8.39	12.73	6.5	3.24	2.96	0.0432789	-1.22039	down
F02_cb6673_c14/f1p0/1301	1	6	0	71	127	136	0.05	0.32	0	6.05	8.41	9.12	1.49831e-17	6.06668	up
F02_cb6673_c3/f1p0/2629	8	17	2	160	255	259	0.19	0.4	0.08	5.68	7.15	7.35	1.11895e-23	5.15228	up
F02_cb6673_c4/f1p0/1834	45	16	42	83	115	119	1.48	0.56	1.71	4.5	4.88	5.09	0.000519495	2.10351	up
F02_cb6678_c9/f1p0/1564	0	0	0	127	173	126	0	0	0	9.3	9.85	7.29	2.2225e-27	Inf	up
F02_cb6753_c17/f1p0/1750	148	142	91	9	8	55	5.18	5.21	4	0.57	0.38	2.54	0.00682819	-2.01044	down
F02_cb679_c7/f1p0/3059	0	0	0	150	179	120	0	0	0	4.82	4.55	3.09	2.33062e-24	Inf	up
F02_cb6819_c10/f1p0/1457	0	2	0	784	1037	1311	0	0.13	0	58.35	60.15	76.92	8.27298e-48	11.0759	up
F02_cb6828_c14/f1p0/1850	0	0	0	121	117	113	0	0	0	6.49	4.92	4.83	1.34517e-24	Inf	up
F02_cb6851_c4/f1p0/2549	12	68	31	136	99	88	0.28	1.61	0.89	5.03	2.89	2.61	0.00655928	2.01589	up
F02_cb6926_c16/f1p3/2293	467	425	329	0	149	171	11.86	11.3	10.39	0	4.9	5.66	0.0255903	-1.48011	down
F02_cb6933_c3/f1p0/2452	69	85	58	17	13	0	1.63	2.1	1.72	0.68	0.42	0	0.00939032	-2.23884	down
F02_cb6956_c10/f1p0/1731	0	0	2	38	36	52	0	0	0.09	2.22	1.65	2.4	3.41176e-09	6.28722	up
F02_cb6956_c25/f1p0/1140	0	0	0	49	23	70	0	0	0	4.83	1.81	5.43	1.88823e-09	Inf	up
F02_cb6956_c9/f1p0/1460	0	0	2	93	86	95	0	0	0.11	6.62	4.78	5.34	5.07839e-18	7.42568	up
F02_cb702_c5/f1p0/2757	141	148	117	307	396	329	2.92	3.21	3.02	10.36	10.56	8.88	0.000100167	1.84712	up
F02_cb7030_c4/f1p1/2083	10	0	5	33	30	16	0.29	0	0.2	1.55	1.1	0.61	0.0165106	2.97627	up
F02_cb7096_c3/f1p0/2044	6	11	9	115	27	116	0.21	0.35	0.35	5.62	1.06	4.52	0.0208224	3.74802	up
F02_cb7188_c0/f2p0/2414	5	9	0	29	44	37	0.13	0.25	0	1.17	1.39	1.17	0.000294441	3.52051	up
F02_cb720_c15/f1p0/1855	71	30	25	99	216	153	2.32	1.05	1.03	5.28	9.02	6.49	0.0146112	2.44453	up
F02_cb720_c29/f1p0/1739	0	0	0	46	138	54	0	0	0	2.76	6.39	2.57	0.000228138	Inf	up
F02_cb7239_c1/f1p0/2595	0	0	0	89	55	67	0	0	0	3.22	1.58	1.94	1.98375e-16	Inf	up
F02_cb7294_c9/f1p0/1317	0	0	0	99	84	92	0	0	0	8.04	5.3	5.88	3.05611e-20	Inf	up
F02_cb7340_c2/f1p0/1809	24	29	23	70	85	113	0.8	1.01	0.95	3.82	3.64	4.9	0.000369673	2.28415	up
F02_cb7361_c3/f1p0/2072	0	0	0	206	177	319	0	0	0	9.63	6.49	11.85	1.6161e-39	Inf	up
F02_cb7362_c20/f1p0/1925	65	145	150	178	291	324	2.04	4.77	5.83	9.17	11.73	13.21	0.00135121	1.56788	up
F02_cb7374_c18/f1p0/2457	2	0	5	141	108	150	0.06	0	0.17	5.42	3.27	4.62	3.63946e-21	6.24052	up
F02_cb7379_c0/f1p0/2388	5	0	0	88	47	77	0.12	0	0	3.47	1.46	2.42	1.4907e-12	6.06317	up
F02_cb7404_c3/f1p0/2062	6	6	3	72	90	87	0.17	0.19	0.13	3.41	3.36	3.28	8.74582e-11	4.56986	up
F02_cb7409_c2/f1p1/2158	55	74	45	4	0	20	1.51	2.13	1.54	0.2	0	0.74	0.0208068	-2.50046	down
F02_cb7465_c4/f1p0/2217	52	58	0	155	161	164	1.37	1.6	0	6.67	5.47	5.62	1.77031e-07	2.69114	up
F02_cb7491_c10/f1p0/2254	0	0	0	78	81	104	0	0	0	3.31	2.72	3.52	1.89922e-19	Inf	up
F02_cb752_c27/f1p0/3189	16	9	4	176	104	111	0.31	0.19	0.11	5.31	2.49	2.69	2.3024e-07	4.32432	up
F02_cb753_c11/f1p0/2257	39	40	36	0	5	8	1.03	1.11	1.18	0	0.19	0.29	0.0397586	-2.73032	down
F02_cb753_c17/f1p0/2245	98	104	78	13	27	14	2.86	3.17	2.84	0.64	1.02	0.56	0.0263866	-1.85548	down
F02_cb7567_c7/f1p0/2407	4	3	7	63	30	64	0.11	0.1	0.21	2.47	0.95	2.02	1.27379e-06	3.92022	up
F02_cb7609_c9/f1p0/1908	3	12	2	26	20	40	0.1	0.42	0.08	1.36	0.82	1.67	0.0142278	2.79981	up
F02_cb7647_c0/f2p0/2318	0	0	0	51	44	70	0	0	0	2.09	1.45	2.31	1.57881e-13	Inf	up
F02_cb7647_c6/f1p0/1811	0	0	45	76	79	161	0	0	1.89	4.17	3.39	6.97	6.30417e-05	3.09549	up
F02_cb7728_c17/f1p0/1688	0	2	0	27	51	55	0	0.08	0	1.61	2.42	2.62	1.17256e-09	6.51962	up
F02_cb7728_c19/f1p0/1487	1	0	0	121	126	204	0.04	0	0	8.48	6.86	11.25	4.17813e-28	9.45005	up
F02_cb7730_c14/f1p4/1716	19	12	14	179	248	246	0.68	0.48	0.65	10.45	11.33	11.37	2.03502e-19	4.40036	up
F02_cb7747_c0/f2p0/1454	131	256	202	305	601	492	5.69	11.6	10.87	21.87	33.57	27.86	0.0208068	1.70947	up
F02_cb7828_c22/f4p1/2233	269	129	242	366	499	399	7.05	3.55	7.89	15.66	16.86	13.6	0.00641734	1.4815	up
F02_cb7836_c6/f1p0/719	0	6	2	29	52	58	0	0.71	0.28	5.69	7.63	8.65	2.74359e-07	4.54202	up
F02_cb7891_c5/f3p0/2303	1	4	0	53	52	27	0.04	0.11	0	2.21	1.72	0.91	1.34563e-06	5.27632	up
F02_cb791_c8/f1p0/2264	23	14	13	42	56	87	0.59	0.38	0.42	1.77	1.89	2.93	0.00240653	2.37199	up
F02_cb7929_c0/f1p0/2297	11	6	7	42	48	71	0.3	0.17	0.23	1.85	1.67	2.47	5.15482e-05	3.23282	up
F02_cb7959_c17/f1p0/2113	23	22	16	37	49	82	0.66	0.66	0.56	1.74	1.79	3.04	0.0325087	1.92654	up
F02_cb7991_c4/f1p0/1871	1	1	0	32	24	43	0.03	0.03	0	1.71	1.02	1.85	2.70496e-07	6.17497	up
F02_cb7991_c5/f1p0/2029	1	0	0	66	43	107	0.03	0	0	3.2	1.66	4.12	1.51168e-13	8.37625	up
F02_cb7995_c9/f1p0/1958	0	7	0	210	129	182	0	0.23	0	10.45	5.04	7.19	1.02107e-23	6.69948	up
F02_cb8006_c8/f1p0/2070	0	6	5	29	54	43	0	0.18	0.19	1.38	1.99	1.6	9.46943e-06	3.92918	up
F02_cb8008_c1/f2p0/2123	0	0	2	41	36	47	0	0	0.09	1.87	1.3	1.73	4.48593e-09	6.2732	up
F02_cb8049_c27/f1p0/1641	0	25	0	79	68	84	0	0.99	0	4.88	3.28	4.11	8.15606e-08	3.68573	up
F02_cb8049_c8/f2p0/2241	140	120	105	262	297	320	3.65	3.3	3.4	11.18	9.98	10.87	0.000238297	1.76342	up
F02_cb8083_c2/f1p0/2130	0	4	21	177	122	154	0	0.12	0.75	7.97	4.34	5.53	6.95188e-17	4.53266	up
F02_cb8102_c4/f1p0/2005	0	0	1	15	23	20	0	0	0.04	0.75	0.88	0.78	0.000111354	6.18606	up
F02_cb8102_c5/f1p0/1819	0	2	0	32	47	63	0	0.07	0	1.77	2.02	2.73	3.20497e-10	6.60596	up
F02_cb8103_c7/f1p1/2159	0	2	6	31	41	34	0	0.06	0.23	1.4	1.47	1.21	2.13522e-05	4.09957	up
F02_cb811_c2/f1p0/1946	0	22	0	220	162	192	0	0.71	0	11.04	6.41	7.64	3.71194e-22	5.1911	up
F02_cb8230_c5/f1p1/2218	104	18	47	169	149	291	2.76	0.51	1.56	7.29	5.08	10.03	8.56318e-06	2.35586	up
F02_cb8232_c2/f1p0/1400	0	0	0	20	21	22	0	0	0	1.5	1.23	1.3	6.30034e-06	Inf	up
F02_cb8263_c0/f5p0/1704	27	17	12	104	195	95	0.97	0.66	0.55	6.12	9.03	4.45	0.00598002	3.37183	up
F02_cb8263_c4/f1p0/1695	11	16	10	73	40	48	0.42	0.62	0.47	4.37	1.89	2.27	0.00139	2.62274	up
F02_cb8263_c7/f1p0/1868	66	50	64	91	136	188	2.34	1.86	2.8	5.29	6.18	8.6	0.00339738	1.6625	up
F02_cb8437_c1/f1p0/1618	63	107	59	245	123	285	2.39	4.26	2.79	15.36	6.04	14.15	0.00344597	1.97431	up
F02_cb8497_c13/f2p0/1857	617	308	403	139	83	109	19.96	10.45	16.19	7.4	3.48	4.6	0.00426439	-1.4883	down
F02_cb850_c79/f1p0/2647	0	6	2	40	34	56	0	0.14	0.05	1.41	0.95	1.58	9.02598e-07	4.44188	up
F02_cb8704_c0/f7p0/2049	264	243	164	371	500	465	7.62	7.36	5.91	17.58	18.62	17.51	0.00590322	1.5021	up
F02_cb8704_c7/f1p1/2182	44	111	81	0	0	0	1.19	3.13	2.73	0	0	0	1.96384e-07	#NAME?	down
F02_cb8716_c0/f1p0/2184	0	0	0	55	36	59	0	0	0	2.42	1.25	2.07	1.40382e-12	Inf	up
F02_cb875_c123/f1p0/818	61	40	5	9015	10373	6253	5.89	4.08	0.63	1475.58	1283.13	785.29	1.708e-05	8.51986	up
F02_cb875_c16/f1p1/803	0	0	0	30	27	30	0	0	0	4.79	3.24	3.64	5.45958e-08	Inf	up
F02_cb875_c211/f1p0/422	0	0	0	417	400	94	0	0	0	258.05	162.79	39.45	4.60388e-07	Inf	up
F02_cb875_c216/f565p3/817	0	0	0	3790	4234	2508	0	0	0	603.74	510.46	306.9	1.46243e-28	Inf	up
F02_cb875_c72/f1p0/2664	173	58	64	209	164	163	3.72	1.32	1.73	7.34	4.57	4.58	0.024916	1.42002	up
F02_cb8822_c4/f1p0/2178	4	3	11	17	32	36	0.11	0.08	0.37	0.77	1.12	1.27	0.020347	2.64006	up
F02_cb8845_c17/f1p0/1614	0	8	0	23	26	21	0	0.33	0	1.5	1.3	1.07	0.00368955	3.624	up
F02_cb8864_c27/f1p0/3617	86	54	75	122	140	183	1.31	0.86	1.41	3.02	2.73	3.61	0.00909334	1.52495	up
F02_cb8864_c34/f1p0/3556	58	37	22	124	130	109	0.91	0.6	0.44	3.15	2.62	2.22	0.000203745	2.18193	up
F02_cb8864_c42/f1p0/2472	10	35	42	158	95	149	0.24	0.86	1.22	5.97	2.84	4.49	4.45344e-07	2.62584	up
F02_cb8864_c59/f1p0/2523	26	34	11	112	111	136	0.59	0.82	0.31	4.16	3.26	4.05	4.21638e-07	2.84871	up
F02_cb8909_c1/f1p0/2162	0	6	7	39	21	19	0	0.18	0.25	1.74	0.75	0.7	0.0195061	3.02845	up
F02_cb8926_c16/f1p0/1179	0	12	0	36	17	43	0	0.76	0	3.46	1.26	3.24	0.000738021	3.45518	up
F02_cb8926_c8/f1p0/2808	44	60	26	134	130	190	0.95	1.36	0.72	4.71	3.61	5.31	8.48981e-06	2.29183	up
F02_cb8972_c1/f1p0/2041	9	24	7	49	38	44	0.28	0.73	0.25	2.34	1.45	1.67	0.0254802	2.20611	up
F02_cb8972_c3/f1p0/1861	69	210	53	263	210	319	2.33	7.36	2.21	14.46	9.07	13.93	0.000300275	1.73063	up
F02_cb9008_c29/f1p1/2805	93	94	174	0	0	15	1.89	1.99	4.38	0	0	0.42	0.00175969	-4.32714	down
F02_cb9024_c9/f1p4/1714	0	9	4	69	33	93	0	0.35	0.19	4.04	1.52	4.34	1.88934e-06	4.30477	up
F02_cb9037_c3/f1p1/2054	5	4	9	73	82	53	0.14	0.13	0.35	3.44	3.08	2.02	3.47395e-08	4.0027	up
F02_cb9061_c1/f1p0/2073	0	5	1	146	115	158	0	0.15	0.04	6.85	4.23	5.9	1.16575e-22	6.57312	up
F02_cb907_c18/f1p0/2216	0	0	0	743	167	637	0	0	0	32.06	5.71	21.93	1.09002e-08	Inf	up
F02_cb907_c19/f1p0/2768	19	0	13	74	29	89	0.4	0	0.35	2.5	0.78	2.39	0.00366422	3.07	up
F02_cb907_c33/f1p0/1897	0	0	1	90	23	84	0	0	0.08	4.68	0.94	3.48	1.45947e-05	7.92842	up
F02_cb907_c35/f1p0/1856	0	0	2	719	212	639	0	0	0.08	38.34	8.89	27.09	4.51533e-10	9.92815	up
F02_cb907_c5/f1p0/4738	22	5	22	1150	497	1096	0.26	0.06	0.31	21.32	7.33	16.32	8.0896e-12	6.27743	up
F02_cb907_c8/f1p0/2642	6	6	3	163	58	93	0.13	0.14	0.08	5.76	1.62	2.62	0.00139078	4.91877	up
F02_cb9080_c6/f1p0/2117	126	227	191	329	236	381	3.47	6.51	6.51	14.73	8.35	13.62	0.0273568	1.2474	up
F02_cb911_c68/f7p3/3821	184	167	139	366	309	465	2.67	2.54	2.51	8.61	5.77	8.76	0.000428569	1.70118	up
F02_cb9230_c0/f1p0/2113	0	2	4	38	19	29	0	0.07	0.17	1.73	0.68	1.08	0.000103624	4.2213	up
F02_cb9280_c12/f1p0/1628	0	23	27	63	55	99	0	0.95	1.27	3.93	2.73	4.89	0.000221939	2.48496	up
F02_cb9285_c5/f1p0/1757	37	37	30	78	105	97	1.33	1.36	1.35	4.53	4.78	4.47	0.00414814	1.92411	up
F02_cb9287_c7/f1p0/2043	193	80	71	539	1102	647	6.4	2.78	2.94	29.31	47.03	27.95	0.0019639	3.29494	up
F02_cb9310_c16/f1p1/2978	0	0	22	129	71	116	0	0	0.52	4.01	1.75	2.87	1.35177e-10	4.16661	up
F02_cb9330_c55/f1p0/2564	18	3	14	74	33	52	0.4	0.09	0.38	2.64	0.94	1.48	0.00987114	2.69276	up
F02_cb9341_c2/f1p0/2098	0	0	0	39	39	45	0	0	0	1.79	1.41	1.65	9.55762e-11	Inf	up
F02_cb9359_c9/f1p0/1129	2	1	1	44	26	34	0.12	0.08	0.07	4.44	2.05	2.65	1.16239e-06	5.2322	up
F02_cb9460_c9/f1p0/1661	341	187	161	48	75	43	12.59	7.23	7.37	2.92	3.61	2.1	0.0194139	-1.5019	down
F02_cb9467_c10/f1p0/2048	157	158	138	523	403	478	4.41	4.63	4.81	23.95	14.54	17.42	4.1171e-06	2.12467	up
F02_cb9501_c2/f2p0/620	12	10	10	219	413	537	1.82	1.62	1.96	55.95	77.13	102.11	3.3477e-13	5.65518	up
F02_cb9548_c29/f1p1/1834	65	79	80	183	194	266	2.15	2.74	3.3	9.9	8.24	11.42	2.42372e-05	1.97628	up
F02_cb9586_c5/f1p1/1200	0	0	0	61	66	65	0	0	0	5.61	4.69	4.71	2.89988e-15	Inf	up
F02_cb9613_c14/f1p1/1800	0	0	47	85	58	185	0	0	1.97	4.69	2.52	8.08	0.0170192	3.07149	up
F02_cb9613_c15/f1p0/1649	0	0	299	343	717	683	0	0	13.92	21.14	34.61	33.38	0.000767669	2.85882	up
F02_cb9613_c17/f1p0/1864	38	30	391	1272	1092	1848	1.25	1.05	15.95	68.47	46.15	79	3.62471e-11	3.53552	up
F02_cb9613_c28/f1p0/1854	68	71	741	1413	2028	2757	2.62	2.89	35.35	89.47	100.54	138.25	7.97828e-07	3.15272	up
F02_cb9613_c6/f1p2/2061	9	0	71	483	274	259	0.27	0	2.53	22.71	10.16	9.69	4.75034e-05	4.05267	up
F02_cb9613_c7/f1p0/2017	0	0	5	18	20	15	0	0	0.21	0.88	0.77	0.59	0.0102814	3.7505	up
F02_cb9613_c9/f1p0/1734	0	2	12	58	46	52	0	0.09	0.53	3.35	2.09	2.4	1.33153e-06	3.83039	up
F02_cb9615_c0/f6p1/1872	372	98	173	363	329	514	11.93	3.3	6.9	19.13	13.61	21.48	0.010893	1.4229	up
F02_cb9643_c7/f1p0/1932	45	54	35	4	0	10	1.4	1.75	1.36	0.2	0	0.43	0.015023	-2.86377	down
F02_cb9661_c0/f1p0/2055	0	0	0	44	33	52	0	0	0	2.07	1.22	1.95	3.83088e-11	Inf	up
F02_cb9698_c1/f1p0/2052	0	0	1	264	279	110	0	0	0.04	12.46	10.36	4.13	9.09756e-10	9.72533	up
F02_cb9700_c3/f1p0/1919	2	6	9	55	40	42	0.06	0.22	0.38	2.81	1.61	1.71	4.50937e-05	3.43847	up
F02_cb9755_c0/f17p1/1812	0	0	0	394	343	546	0	0	0	21.53	14.72	23.7	1.00783e-48	Inf	up
F02_cb9769_c46/f1p0/1920	108	104	120	0	29	24	3.4	3.42	4.68	0	1.17	1	0.00254786	-2.19779	down
F02_cb9787_c4/f1p0/796	0	0	0	13	20	17	0	0	0	2.16	2.51	2.16	0.000108109	Inf	up
F02_cb9845_c4/f1p0/1681	0	0	0	64	39	70	0	0	0	3.82	1.84	3.34	4.76701e-14	Inf	up
F02_cb9845_c5/f1p0/1465	0	0	0	23	44	61	0	0	0	1.69	2.46	3.43	4.92054e-11	Inf	up
F02_cb9874_c43/f1p0/3019	0	0	0	60	67	100	0	0	0	1.81	1.6	2.41	2.85327e-17	Inf	up
F02_cb9875_c1/f3p0/2026	99	37	55	152	119	163	2.91	1.14	2.01	7.3	4.5	6.24	0.00332175	1.69966	up
F02_cb9898_c2/f1p0/2021	0	11	0	25	20	20	0	0.34	0	1.21	0.77	0.78	0.0257429	3.05567	up
F02_cb9933_c2/f1p0/1805	709	507	427	91	213	66	23.68	17.74	17.73	5.04	9.2	2.9	0.000786332	-1.59374	down
F02_cb9944_c2/f1p0/1751	0	0	0	38	29	41	0	0	0	2.17	1.31	1.87	1.23193e-09	Inf	up
F02_cb994_c16/f1p0/974	17	17	17	71	101	168	1.23	1.29	1.53	8.68	9.47	15.97	9.25535e-07	3.18115	up
F02_cb994_c8/f1p0/2496	0	0	0	237	146	330	0	0	0	8.84	4.3	9.82	2.67643e-25	Inf	up
F02_cb9964_c4/f3p0/1706	9	13	13	44	23	46	0.33	0.5	0.6	2.62	1.06	2.16	0.0464241	2.1399	up
F02_cb9988_c12/f1p0/1460	0	0	0	34	129	40	0	0	0	2.45	7.21	2.28	0.00650928	Inf	up

## Sheet: T07_T08_T09_vs_T15_T16_T17.DEG_
#ID	T07_Count	T08_Count	T09_Count	T15_Count	T16_Count	T17_Count	T07_FPKM	T08_FPKM	T09_FPKM	T15_FPKM	T16_FPKM	T17_FPKM	FDR	log2FC	regulated
F01_cb10014_c0/f1p0/2064	78	77	37	127	131	122	2.65	2.24	1.04	4.73	5.13	4.97	0.00614271	1.47189	up
F01_cb10058_c15/f6p2/1549	11	10	22	89	56	111	0.56	0.44	0.9	4.68	3.08	6.32	1.63844e-05	3.12339	up
F01_cb10084_c25/f1p0/1985	54	32	48	148	228	258	2.04	1.04	1.52	6.16	9.94	11.65	1.17964e-05	2.76781	up
F01_cb10096_c7/f1p0/2055	54	36	53	100	122	114	1.86	1.07	1.51	3.76	4.8	4.64	0.00153194	1.75122	up
F01_cb10143_c9/f2p1/1600	0	39	0	49	36	48	0	1.53	0	2.5	1.93	2.64	0.00741662	2.28472	up
F01_cb10189_c5/f2p0/2044	68	219	123	215	181	222	2.33	6.43	3.5	8.09	7.13	9.09	0.0434894	1.12451	up
F01_cb10189_c7/f1p0/2041	144	333	230	387	389	364	4.94	9.78	6.54	14.61	15.37	14.93	0.0133831	1.21944	up
F01_cb10205_c10/f1p0/1899	36	0	0	42	49	37	1.4	0	0	1.77	2.2	1.69	0.0066001	2.21711	up
F01_cb10245_c15/f1p0/1736	56	53	88	6	20	12	2.33	1.91	3.04	0.28	0.96	0.63	0.0499204	-1.81378	down
F01_cb10245_c7/f2p0/1438	319	319	346	112	114	44	16.55	14.18	14.96	6.4	6.85	2.79	0.00496803	-1.36576	down
F01_cb10247_c17/f3p1/1905	0	0	0	38	68	46	0	0.02	0	1.57	2.94	2.08	2.26336e-13	Inf	up
F01_cb10274_c9/f2p2/1644	137	295	229	0	52	41	6.08	11.16	8.42	0	2.66	2.2	0.00265659	-2.24406	down
F01_cb10307_c6/f1p0/1642	50	78	77	0	0	0	2.23	2.97	2.84	0	0	0	4.14613e-11	#NAME?	down
F01_cb1032_c13/f1p1/3597	58	54	27	0	11	0	1.06	0.85	0.41	0	0.24	0	0.00746959	-3.13788	down
F01_cb10372_c23/f1p0/2923	7	11	6	47	42	33	0.17	0.22	0.12	1.18	1.12	0.92	0.000849328	2.84596	up
F01_cb10390_c14/f4p1/2017	490	643	852	228	218	184	17.02	19.11	24.54	8.72	8.74	7.66	0.0298207	-1.1227	down
F01_cb10395_c36/f1p0/1973	315	377	429	8	178	117	11.97	12.28	13.54	0.35	7.8	5.34	0.0477591	-1.31344	down
F01_cb10412_c2/f1p1/2011	259	205	168	21	11	0	9.03	6.11	4.86	0.82	0.46	0	9.33515e-09	-3.86845	down
F01_cb10460_c27/f8p2/1995	96	110	131	24	34	27	3.4	3.32	3.84	0.96	1.39	1.16	0.048736	-1.45205	down
F01_cb1053_c14/f1p0/1546	2	5	3	38	26	23	0.1	0.2	0.12	2.01	1.43	1.31	0.000394995	3.63223	up
F01_cb10542_c11/f1p0/1831	96	289	145	0	0	0	3.74	9.61	4.7	0	0	0	9.09673e-07	#NAME?	down
F01_cb1054_c21/f1p1/2448	46	44	29	2	0	3	1.3	1.06	0.67	0.08	0	0.12	0.000310959	-4.07599	down
F01_cb10558_c1/f1p1/3254	160	168	229	287	242	290	3.26	2.95	3.87	6.45	5.66	7.08	0.0456543	1.08535	up
F01_cb10578_c7/f1p0/1964	130	166	144	31	38	37	4.68	5.08	4.3	1.23	1.59	1.61	0.012255	-1.5277	down
F01_cb10587_c2/f2p1/1991	183	2939	1189	0	1	0	6.47	88.62	34.77	0	0.04	0	0.00309849	-11.4907	down
F01_cb10587_c5/f1p0/1051	105	1415	874	0	0	0	8.17	93.43	56.44	0	0	0	0.000155452	#NAME?	down
F01_cb10600_c115/f1p0/3141	69	81	66	5	11	13	1.47	1.48	1.16	0.14	0.28	0.35	0.00336909	-2.35623	down
F01_cb10600_c199/f1p1/1838	0	0	3	34	18	32	0	0	0.12	1.47	0.83	1.49	4.3062e-06	5.44813	up
F01_cb10600_c39/f2p1/1893	108	67	112	23	18	23	4.03	2.16	3.49	0.95	0.78	1.03	0.0347504	-1.6517	down
F01_cb10600_c98/f1p0/3408	124	120	136	33	22	45	2.54	2.11	2.3	0.76	0.53	1.11	0.0444064	-1.4023	down
F01_cb1060_c9/f1p0/2689	11	19	14	51	34	50	0.29	0.42	0.3	1.41	0.99	1.5	0.0137938	2.13666	up
F01_cb10611_c14/f1p0/1725	0	9	0	22	19	44	0	0.35	0	1.1	0.98	2.32	0.010733	3.77603	up
F01_cb10614_c1/f1p1/1983	24	61	35	0	0	1	0.88	1.86	1.05	0	0	0.05	4.35787e-05	-6.30722	down
F01_cb10628_c16/f1p1/857	771	851	1226	245	317	175	82.64	77.19	109.42	28.93	40.18	22.55	0.00298471	-1.41813	down
F01_cb10683_c0/f2p0/1909	81	158	143	0	0	0	3.01	5.03	4.42	0	0	0	1.18264e-18	#NAME?	down
F01_cb10683_c3/f1p0/5275	30	135	122	0	2	1	0.37	1.41	1.23	0.01	0.03	0.01	0.000362189	-5.97424	down
F01_cb10694_c17/f3p0/1699	516	880	638	260	190	142	21.9	31.94	22.5	12.18	9.34	7.23	0.00939151	-1.27642	down
F01_cb10699_c0/f1p0/1975	82	110	88	185	116	144	2.92	3.36	2.62	7.27	4.77	6.13	0.0412694	1.17396	up
F01_cb10699_c6/f1p0/1295	521	561	645	1	5	3	30.85	28.32	31.74	0.07	0.34	0.21	5.81021e-42	-7.02809	down
F01_cb10707_c1/f1p0/1973	2	38	30	214	86	101	0.07	1.18	0.91	8.41	3.56	4.31	0.00343744	3.05497	up
F01_cb1070_c8/f1p0/3686	35	35	34	0	0	0	0.63	0.54	0.51	0	0	0	3.75255e-06	#NAME?	down
F01_cb10715_c25/f1p0/1650	298	312	336	67	83	83	14.62	13.08	13.69	3.66	4.73	4.88	0.00112186	-1.494	down
F01_cb10740_c4/f1p0/1141	269	346	279	90	91	67	18.73	20.53	16.19	6.92	7.4	5.64	0.00673422	-1.34005	down
F01_cb10741_c1/f1p0/1890	33	35	32	0	0	2	1.26	1.16	1.04	0	0	0.09	0.000155578	-5.05849	down
F01_cb10750_c11/f2p0/1929	2292	2271	1474	732	403	384	83.71	71.03	44.74	29.44	17.01	16.79	0.0240022	-1.51805	down
F01_cb10750_c4/f4p0/1966	189	139	141	66	15	31	6.78	4.28	4.21	2.62	0.65	1.33	0.0212805	-1.60465	down
F01_cb10751_c2/f1p0/1780	59	73	88	205	129	212	2.37	2.51	2.96	9.08	6	10.2	5.50094e-05	1.83945	up
F01_cb10789_c9/f1p0/1949	62	56	88	0	0	0	2.26	1.76	2.65	0	0	0	3.67553e-11	#NAME?	down
F01_cb10793_c6/f1p0/1406	45	75	74	161	148	168	2.49	3.5	3.38	9.68	9.39	10.96	0.000125338	1.83281	up
F01_cb10803_c0/f1p0/1925	116	78	179	43	21	8	4.27	2.46	5.46	1.77	0.91	0.38	0.0295488	-1.88434	down
F01_cb1083_c8/f2p1/1920	0	4	0	39	39	142	0	0.13	0	1.62	1.69	6.27	0.0426811	6.3343	up
F01_cb1086_c30/f1p1/1622	0	0	0	15	21	15	0	0	0	0.74	1.1	0.84	3.51882e-05	Inf	up
F01_cb1086_c6/f2p1/1625	100	184	125	0	0	0	4.48	7.06	4.68	0	0	0	7.12724e-17	#NAME?	down
F01_cb10878_c9/f1p0/1948	2	12	1	36	15	49	0.1	0.38	0.04	1.46	0.64	2.14	0.029316	3.24799	up
F01_cb10892_c4/f1p1/1917	49	36	58	161	185	104	1.81	1.14	1.78	6.56	7.87	4.58	4.97497e-06	2.16901	up
F01_cb10893_c9/f1p2/1730	72	71	75	127	141	100	3.03	2.55	2.6	5.85	6.79	4.98	0.0362576	1.26788	up
F01_cb10918_c7/f5p1/1956	111	117	141	3	12	5	4.01	3.6	4.21	0.13	0.53	0.24	7.96273e-09	-3.65694	down
F01_cb10942_c4/f2p0/1749	43	29	46	170	131	254	1.78	1.05	1.59	7.69	6.2	12.49	0.000424979	2.75988	up
F01_cb10945_c1/f2p0/1773	202	328	407	530	378	552	8.18	11.33	13.64	23.54	17.64	26.68	0.024462	1.18097	up
F01_cb10956_c1/f2p0/1531	0	0	8	17	36	37	0	0	0.35	0.94	2.04	2.18	0.000170506	4.16493	up
F01_cb10997_c0/f3p0/1934	29	32	51	68	104	60	1.06	1.03	1.54	2.73	4.37	2.61	0.027165	1.594	up
F01_cb11056_c4/f1p2/1808	29	68	61	10	15	0	1.17	2.32	2.02	0.45	0.7	0	0.0365013	-2.1403	down
F01_cb11068_c1/f1p0/2596	15	17	24	51	44	57	0.41	0.4	0.52	1.48	1.32	1.81	0.0194971	1.97757	up
F01_cb11075_c1/f1p0/1830	180	159	181	47	35	24	7.19	5.46	6	2.09	1.66	1.17	0.00095732	-1.79973	down
F01_cb11075_c5/f1p0/5767	108	160	170	0	13	0	1.2	1.51	1.55	0	0.16	0	5.17634e-13	-4.50543	down
F01_cb11089_c27/f1p1/1448	1616	1069	1345	176	517	269	94.27	53.22	65.21	11.32	35.03	18.84	0.0134835	-1.54139	down
F01_cb11130_c2/f1p0/1788	13	7	0	47	20	34	0.54	0.25	0	2.06	0.93	1.65	0.0026768	2.74957	up
F01_cb11173_c4/f4p0/1867	172	167	142	39	28	31	6.54	5.44	4.47	1.65	1.27	1.45	0.00138065	-1.79848	down
F01_cb11192_c9/f1p2/1577	0	0	0	18	15	19	0	0	0	0.95	0.85	1.1	2.85153e-05	Inf	up
F01_cb11230_c5/f1p1/1889	10	0	0	21	38	40	0.42	0	0	0.95	1.78	1.91	6.6818e-05	3.71551	up
F01_cb11316_c3/f1p0/1889	12	8	10	45	62	32	0.48	0.28	0.32	1.87	2.68	1.45	0.0007158	2.71525	up
F01_cb11343_c0/f4p0/573	43	43	55	117	99	96	8.73	7.31	9.24	25.88	24.3	23.14	0.00421471	1.66459	up
F01_cb11350_c3/f1p0/1864	258	174	229	2	0	0	9.84	5.69	7.26	0.08	0	0	1.59089e-24	-7.97358	down
F01_cb11350_c7/f1p0/1586	242	266	242	33	42	32	12.01	11.26	9.97	1.81	2.42	1.94	4.16672e-07	-2.29204	down
F01_cb1137_c15/f1p0/1892	366	227	387	19	82	66	13.7	7.28	12.01	0.79	3.55	2.96	0.000341876	-2.00216	down
F01_cb11391_c55/f1p0/1254	684	1211	911	0	1	1	42.15	63.65	46.65	0	0.13	0.15	7.00091e-34	-9.87463	down
F01_cb11427_c11/f1p0/1906	2660	1671	1946	835	151	87	102.4	55.07	62.24	35.4	6.72	4.03	0.0220612	-2.12488	down
F01_cb11427_c17/f1p0/1760	1860	1151	1487	648	122	46	78.1	41.38	51.88	30.01	5.95	2.34	0.0330807	-2.0386	down
F01_cb11427_c22/f1p0/1624	1064	603	625	237	63	46	48	23.27	23.44	11.81	3.3	2.51	0.0405977	-2.29802	down
F01_cb11427_c24/f1p1/1363	877	696	900	379	70	39	48.63	32.95	41.49	23.18	4.56	2.61	0.00434511	-1.9015	down
F01_cb11427_c26/f3p1/1650	3389	2096	2842	1200	196	86	148.82	78.7	103.68	58.07	9.97	4.53	0.0265455	-2.06633	down
F01_cb11446_c9/f34p2/1815	45	43	42	116	98	149	1.79	1.45	1.39	5.04	4.44	7.03	0.00011469	1.99813	up
F01_cb11455_c7/f1p0/2557	45	36	22	0	0	2	1.21	0.83	0.51	0	0	0.09	9.79445e-05	-5.12869	down
F01_cb11467_c3/f1p0/1219	5	14	39	159	236	99	0.32	0.8	2.09	11.18	17.52	7.57	0.000195057	3.67984	up
F01_cb11503_c7/f1p1/1431	14	7	18	65	53	40	0.74	0.31	0.8	3.76	3.26	2.53	0.000916633	2.53124	up
F01_cb11551_c1/f2p0/2063	139	411	346	31	25	17	4.72	11.92	9.71	1.15	0.97	0.69	0.00192248	-3.08863	down
F01_cb11563_c14/f1p0/2350	42	220	219	15	0	13	1.23	5.49	5.31	0.51	0	0.46	0.0401819	-3.56273	down
F01_cb11563_c16/f1p1/2218	608	780	722	193	230	184	18.93	20.81	18.65	6.62	8.25	6.85	0.00810813	-1.2743	down
F01_cb11563_c21/f1p1/1772	54	94	87	0	0	9	2.2	3.28	2.94	0	0	0.44	2.67304e-07	-4.10116	down
F01_cb11569_c5/f1p2/1673	18	38	28	96	72	61	0.82	1.41	1.03	4.58	3.64	3.16	0.00285377	1.96297	up
F01_cb11575_c4/f1p0/1375	15	0	16	35	36	25	0.87	0	0.77	2.14	2.31	1.65	0.0444314	2.14041	up
F01_cb11583_c0/f6p0/1654	53	53	49	22	0	0	2.35	2	1.79	1.1	0	0	0.0216036	-2.41893	down
F01_cb11621_c5/f1p0/1609	202	167	176	7	7	9	9.15	6.48	6.64	0.35	0.41	0.54	1.62128e-13	-4.05175	down
F01_cb11692_c1/f1p0/1836	37	57	65	2	4	0	1.54	2.01	2.24	0.11	0.23	0	1.88084e-05	-4.20246	down
F01_cb11707_c14/f1p0/1266	243	271	297	70	95	52	14.82	14.11	15.03	4.7	6.78	3.81	0.00518875	-1.38048	down
F01_cb11707_c16/f1p0/1131	357	385	399	82	89	61	25.16	23.12	23.4	6.41	7.34	5.22	2.9989e-05	-1.78406	down
F01_cb11707_c6/f1p0/1699	667	684	838	129	174	108	28.31	24.83	29.54	6.03	8.54	5.52	4.74507e-06	-1.88801	down
F01_cb11712_c8/f1p0/1742	138	108	203	299	239	187	5.7	3.82	6.95	13.56	11.37	9.24	0.01543	1.2101	up
F01_cb11749_c4/f1p0/1836	119	101	152	15	41	21	4.72	3.42	5	0.67	1.88	1.01	0.00623004	-1.72863	down
F01_cb11756_c0/f4p0/1808	14	31	0	39	41	45	0.56	1.05	0	1.71	1.88	2.16	0.0331656	1.9549	up
F01_cb11761_c3/f1p1/1827	126	55	129	0	0	2	4.92	1.85	4.2	0	0	0.11	4.11665e-08	-6.68925	down
F01_cb11766_c3/f1p1/1641	0	9	6	34	41	22	0	0.34	0.25	1.69	2.12	1.19	0.000861591	3.25616	up
F01_cb11811_c0/f2p0/1818	5	14	17	150	68	255	0.2	0.48	0.57	6.5	3.09	11.99	0.0167473	4.2852	up
F01_cb11822_c2/f8p0/1814	246	125	223	24	49	34	9.67	4.21	7.28	1.07	2.22	1.61	0.00989168	-1.9487	down
F01_cb11860_c0/f33p1/1139	210	207	246	48	51	105	14.71	12.33	14.29	3.73	4.19	8.78	0.0403727	-1.15774	down
F01_cb11860_c3/f3p1/1138	161	157	225	50	59	50	11.26	9.36	13.12	3.88	4.81	4.21	0.041108	-1.23992	down
F01_cb11875_c10/f1p0/2323	219	203	255	66	102	45	6.47	5.15	6.27	2.18	3.48	1.6	0.0499458	-1.14797	down
F01_cb11908_c1/f4p1/1730	224	164	196	2	0	5	9.31	5.86	6.76	0.1	0	0.28	7.07843e-21	-5.85308	down
F01_cb11935_c11/f1p0/1638	23	22	26	70	51	47	1.05	0.85	0.98	3.42	2.61	2.51	0.0342776	1.74856	up
F01_cb11956_c4/f1p0/1557	16	14	3	45	30	46	0.76	0.56	0.12	2.33	1.65	2.64	0.00706637	2.33544	up
F01_cb12062_c4/f1p0/1713	29	28	46	127	47	116	1.22	1.01	1.6	5.87	2.28	5.83	0.0387044	2.01681	up
F01_cb12075_c3/f1p0/1783	109	186	151	294	205	193	4.31	6.31	4.97	12.81	9.34	9.14	0.0266639	1.14596	up
F01_cb12134_c2/f1p0/1716	226	245	298	14	14	0	9.44	8.77	10.37	0.67	0.69	0	5.92924e-18	-4.28978	down
F01_cb12163_c5/f1p0/1883	121	96	119	1	3	1	4.54	3.09	3.71	0.04	0.13	0.04	9.00787e-13	-5.54243	down
F01_cb12224_c114/f1p0/1720	341	183	293	24	96	48	14.27	6.56	10.18	1.1	4.66	2.4	0.0386705	-1.74979	down
F01_cb12224_c116/f1p0/1861	955	566	702	109	157	151	38.82	19.71	23.7	4.91	7.4	7.39	0.00424496	-1.90337	down
F01_cb12224_c143/f1p0/2307	177	119	179	36	7	0	5.29	3.05	4.44	1.19	0.27	0	1.32826e-07	-3.03907	down
F01_cb12224_c401/f1p0/3094	22	44	30	1	0	3	0.49	0.82	0.55	0.04	0	0.08	0.00166549	-4.03089	down
F01_cb12224_c454/f1p0/2252	36	185	115	301	147	278	1.11	4.87	2.92	10.14	5.18	10.19	0.0465966	1.64874	up
F01_cb12230_c15/f1p0/2900	140	129	196	7	55	20	3.3	2.63	3.83	0.2	1.51	0.59	0.000338406	-1.94104	down
F01_cb12251_c1/f4p0/1705	438	418	531	200	107	119	18.51	15.1	18.65	9.34	5.24	6.04	0.0172026	-1.20163	down
F01_cb12252_c11/f1p1/2096	265	854	402	0	0	0	8.81	24.28	11.1	0	0	0	1.24654e-07	#NAME?	down
F01_cb12252_c12/f1p0/1588	110	274	103	0	0	1	5.09	10.79	3.97	0	0	0.06	2.09923e-05	-8.34168	down
F01_cb12274_c38/f1p1/3068	374	284	282	22	38	25	8.1	5.28	5.08	0.53	0.96	0.67	1.12255e-09	-2.95594	down
F01_cb12292_c5/f1p0/1720	45	60	75	151	80	150	1.88	2.15	2.61	6.96	3.86	7.49	0.00572713	1.61163	up
F01_cb12436_c1/f1p0/3648	14	21	24	63	51	51	0.26	0.34	0.36	1.25	1.07	1.1	0.0116037	2.01293	up
F01_cb12463_c6/f5p0/1716	225	219	205	28	19	18	9.45	7.86	7.14	1.29	0.95	0.94	4.86063e-09	-2.82527	down
F01_cb12477_c2/f1p0/1702	41	69	64	9	12	4	1.75	2.51	2.27	0.43	0.62	0.22	0.0147773	-2.27701	down
F01_cb12531_c16/f1p0/1929	409	558	496	191	150	77	14.94	17.46	15.05	7.69	6.32	3.37	0.00625789	-1.30825	down
F01_cb12595_c10/f1p0/1578	19	20	21	73	80	53	0.92	0.79	0.84	3.73	4.34	2.96	0.000692018	2.29282	up
F01_cb12595_c9/f1p0/1636	55	56	75	0	0	10	2.46	2.14	2.78	0	0	0.57	2.54286e-05	-3.61676	down
F01_cb12609_c2/f1p0/1628	90	69	72	131	131	123	4.02	2.66	2.7	6.46	6.79	6.62	0.0364816	1.23988	up
F01_cb12626_c6/f1p0/1556	187	129	236	43	75	42	8.84	5.22	9.26	2.25	4.11	2.4	0.0350127	-1.25411	down
F01_cb12639_c8/f1p1/1722	0	0	0	15	21	53	0	0	0	0.71	1.05	2.68	0.00348853	Inf	up
F01_cb12668_c5/f1p0/1679	33	49	70	162	142	128	1.42	1.82	2.51	7.7	7.09	6.62	2.64189e-05	2.04635	up
F01_cb12685_c132/f1p0/3004	81	72	116	0	0	0	1.93	1.47	2.3	0	0	0	6.65204e-14	#NAME?	down
F01_cb12685_c135/f1p1/2658	33	27	32	97	102	65	0.84	0.61	0.69	2.72	2.99	2	0.00070429	2.0257	up
F01_cb12687_c37/f1p1/1395	365	473	474	76	68	208	19.31	21.35	20.84	4.47	4.18	13.21	0.00739138	-1.34573	down
F01_cb12764_c5/f1p0/1528	188	166	182	11	40	41	9.74	7.36	7.82	0.66	2.4	2.59	8.60958e-05	-1.99449	down
F01_cb12809_c1/f3p1/1474	5	0	13	32	55	25	0.29	0	0.54	1.8	3.26	1.54	0.0032084	3.21205	up
F01_cb12889_c1/f1p0/1671	108	49	131	18	19	5	4.67	1.81	4.71	0.86	0.95	0.26	0.0234168	-2.27546	down
F01_cb12893_c12/f1p0/1107	327	400	389	143	151	66	25.26	26.31	24.99	12.17	13.67	6.14	0.0352856	-1.12507	down
F01_cb12893_c3/f2p1/556	890	991	1125	437	246	264	189.13	175.16	199.43	102.42	63.87	67.06	0.0468654	-1.1622	down
F01_cb12905_c2/f1p0/1516	165	179	195	57	44	24	8.04	7.46	7.89	3.06	2.52	1.41	0.0037001	-1.60962	down
F01_cb12952_c0/f5p0/1677	7	9	4	55	20	34	0.32	0.34	0.14	2.62	1.03	1.8	0.00198029	2.91641	up
F01_cb12990_c2/f1p1/1626	63	94	49	176	148	151	2.84	3.62	1.83	8.67	7.64	8.1	0.000322811	1.70599	up
F01_cb13006_c2/f1p0/1686	93	66	106	238	302	212	3.99	2.43	3.79	11.25	14.95	10.87	1.32223e-06	2.02593	up
F01_cb13044_c254/f1p2/1109	29	59	26	0	0	1	2.16	3.63	1.56	0	0	0.09	0.000102876	-6.24862	down
F01_cb13044_c306/f1p0/1248	149	34	331	0	0	0	9.29	1.8	17.07	0	0	0	0.00157058	#NAME?	down
F01_cb13044_c321/f1p0/1548	86	124	357	0	0	0	4.11	5.06	14.07	0	0	0	9.59142e-05	#NAME?	down
F01_cb13044_c653/f1p0/1794	25	18	0	73	50	74	1.02	0.62	0	3.22	2.32	3.56	6.78833e-05	2.63331	up
F01_cb13050_c10/f1p0/1283	58	94	63	0	0	0	3.5	4.79	3.13	0	0	0	1.27984e-11	#NAME?	down
F01_cb13050_c8/f2p0/471	50	52	54	0	0	0	15.39	12.94	13.68	0	0	0	7.88843e-09	#NAME?	down
F01_cb13050_c9/f1p0/1675	22	23	27	0	0	0	0.99	0.85	0.98	0	0	0	0.000259623	#NAME?	down
F01_cb13060_c4/f2p0/862	59	79	65	178	123	142	6.08	6.86	5.58	20.16	14.88	17.4	0.000961543	1.63437	up
F01_cb13069_c21/f1p0/1236	598	719	571	63	47	69	44.93	45.95	35.72	5.22	4.13	6.23	3.235e-13	-2.88634	down
F01_cb13069_c59/f1p1/1061	101	119	128	323	385	191	7.8	7.81	8.17	27.32	34.47	17.52	0.00154193	1.88588	up
F01_cb13078_c9/f1p1/1373	89	44	82	8	17	11	4.9	2.09	3.75	0.49	1.13	0.73	0.0147639	-2.05351	down
F01_cb13087_c25/f1p0/1091	13	15	8	74	54	67	0.96	0.94	0.49	6.02	4.68	5.92	1.62175e-05	2.92836	up
F01_cb13090_c23/f1p0/472	57	57	82	105	137	114	18	14.88	21.79	36.79	54.53	43.27	0.0193496	1.39737	up
F01_cb13112_c1/f6p0/1231	522	296	562	149	115	97	32.96	15.95	29.47	10.37	8.44	7.38	0.0182908	-1.43078	down
F01_cb13140_c2/f2p0/1227	65	105	105	227	210	238	4.14	5.68	5.54	15.85	15.49	18.1	2.85153e-05	1.82996	up
F01_cb13141_c2/f1p0/1970	55	93	95	0	0	0	1.96	2.84	2.81	0	0	0	9.02158e-13	#NAME?	down
F01_cb13141_c6/f17p0/641	29	85	73	0	0	0	4.77	11.8	10.06	0	0	0	2.03447e-07	#NAME?	down
F01_cb13141_c7/f4p0/640	890	949	1007	0	0	1	146.14	130.62	137.8	0	0	0.2	1.35153e-55	-10.8828	down
F01_cb13152_c7/f1p0/1586	415	651	761	0	9	234	20.3	27.18	30.94	0	0.54	13.72	0.00265898	-2.30013	down
F01_cb13169_c5/f1p1/807	248	216	265	0	0	0	28.02	20.63	24.92	0	0	0	7.49324e-32	#NAME?	down
F01_cb13184_c7/f1p1/894	144	83	105	229	130	241	14.06	6.9	8.52	24.55	14.93	28.03	0.0354745	1.34838	up
F01_cb13199_c3/f1p0/1602	13	12	1	45	36	22	0.61	0.48	0.06	2.28	1.91	1.21	0.00932288	2.4229	up
F01_cb13206_c5/f1p0/1209	173	250	265	97	90	28	11.23	13.8	14.23	6.95	6.81	2.16	0.047726	-1.17053	down
F01_cb13237_c7/f1p0/702	145	105	112	258	302	238	21.96	13.3	14.12	42.93	54.49	42.88	0.000124093	1.64321	up
F01_cb13279_c4/f3p0/706	34	26	55	106	80	142	4.83	3.06	6.38	16.39	13.33	23.78	0.00102166	2.05545	up
F01_cb1327_c40/f1p1/2323	228	158	194	29	70	43	6.79	4.04	4.8	0.96	2.42	1.54	0.00449481	-1.5059	down
F01_cb13296_c5/f1p0/1135	73	33	90	5	0	0	5.13	2.01	5.27	0.42	0	0	2.50157e-05	-4.88137	down
F01_cb1330_c6/f1p0/2615	4	17	9	39	26	46	0.11	0.39	0.2	1.12	0.79	1.43	0.00984786	2.42615	up
F01_cb1333_c12/f1p0/3674	106	79	145	230	313	207	1.89	1.21	2.15	4.52	6.39	4.41	8.23662e-05	1.71585	up
F01_cb13375_c587/f1p0/949	25	36	51	1	1	0	2.26	2.76	3.85	0.12	0.11	0	4.70707e-05	-5.29928	down
F01_cb13379_c5/f1p0/2208	8	4	12	41	30	26	0.25	0.11	0.31	1.41	1.08	0.98	0.0110145	2.53511	up
F01_cb13415_c4/f1p0/1116	30	27	31	115	60	66	2.2	1.66	1.9	9.08	5.03	5.72	0.00204258	1.94626	up
F01_cb13436_c7/f1p0/1250	231	197	210	58	57	39	14.39	10.45	10.91	4.01	4.18	2.94	0.00278632	-1.54961	down
F01_cb13440_c4/f1p0/1628	77	50	56	108	108	111	3.77	2.1	2.25	5.76	6.09	6.45	0.0299495	1.33765	up
F01_cb13468_c0/f3p0/755	90	118	96	300	171	169	11.37	12.53	10.06	41.34	25.5	25.43	0.000829784	1.56926	up
F01_cb13468_c3/f1p0/758	98	112	146	0	0	0	12.45	12.03	15.45	0	0	0	1.41518e-17	#NAME?	down
F01_cb13473_c0/f1p0/1357	68	78	70	8	0	8	3.81	3.73	3.27	0.55	0	0.56	5.41313e-05	-3.25671	down
F01_cb13478_c5/f3p0/1287	178	147	220	42	33	77	10.66	7.5	10.91	2.8	2.34	5.53	0.0243221	-1.30294	down
F01_cb13495_c2/f1p0/1438	111	136	200	300	354	276	5.73	6.03	8.58	17.11	21.21	17.06	0.000258858	1.59797	up
F01_cb13497_c13/f3p0/1157	33	67	38	0	6	13	2.31	3.94	2.18	0	0.49	1.12	0.029447	-2.27976	down
F01_cb13513_c3/f1p0/590	221	303	272	115	56	84	41.69	47.72	42.83	23.97	12.78	18.94	0.0475589	-1.13612	down
F01_cb13543_c5/f1p0/1049	42	65	89	3	0	7	3.27	4.36	5.79	0.32	0	0.66	1.30491e-05	-3.72777	down
F01_cb13561_c6/f1p0/1050	4	5	7	29	17	23	0.34	0.34	0.51	2.54	1.63	2.14	0.032784	2.6352	up
F01_cb13576_c4/f1p1/785	794	963	878	288	268	230	93.82	96.1	86.31	37.55	37.49	32.59	0.0185343	-1.2324	down
F01_cb13585_c6/f1p0/1320	0	20	20	43	41	31	0	1.08	1.03	2.95	2.98	2.29	0.0362694	2.09789	up
F01_cb1366_c10/f1p1/3459	110	172	85	14	0	17	2.1	2.81	1.35	0.3	0	0.39	0.000398338	-3.06774	down
F01_cb13704_c1/f1p0/897	96	66	96	9	8	2	9.35	5.48	7.8	1.02	0.98	0.24	1.09211e-05	-3.27827	down
F01_cb13793_c11/f1p0/1473	64	57	35	228	211	153	3.25	2.46	1.48	12.7	12.33	9.25	1.67269e-08	2.40459	up
F01_cb13823_c2/f1p1/2135	10	6	7	29	35	34	0.34	0.19	0.21	1.04	1.32	1.32	0.00774251	2.59451	up
F01_cb13837_c0/f5p0/814	109	149	172	0	0	0	12.16	14.05	15.96	0	0	0	9.5901e-21	#NAME?	down
F01_cb1384_c0/f1p0/3820	180	222	221	17	33	44	3.06	3.25	3.13	0.33	0.66	0.9	4.81327e-06	-2.17798	down
F01_cb1384_c3/f1p0/3801	418	385	453	132	145	100	7.29	5.77	6.57	2.54	2.9	2.09	0.0128733	-1.22295	down
F01_cb1384_c5/f1p0/1853	119	151	146	37	37	30	4.59	4.96	4.67	1.57	1.66	1.38	0.0215915	-1.48149	down
F01_cb13860_c10/f1p0/866	67	42	58	0	0	18	6.85	3.65	4.99	0	0	2.29	0.00306332	-2.63473	down
F01_cb13866_c6/f3p0/1596	421	345	336	161	72	74	19.25	13.51	12.77	8.12	3.81	4.08	0.00508838	-1.37074	down
F01_cb13889_c1/f1p1/1335	89	109	68	259	207	204	5.07	5.33	3.23	16.27	13.74	13.93	1.86356e-05	1.82888	up
F01_cb13992_c0/f1p0/1312	7	6	8	102	101	79	0.41	0.3	0.39	6.53	6.82	5.5	3.91522e-12	4.26182	up
F01_cb14069_c3/f1p0/1167	57	34	49	7	3	0	4.55	2.38	3.25	0.62	0.28	0	0.00104638	-3.36792	down
F01_cb14129_c0/f2p0/1557	13	19	26	74	39	35	0.65	0.79	1.05	3.86	2.14	2.02	0.0321066	1.86767	up
F01_cb14188_c5/f1p0/818	43	61	41	0	12	9	4.85	5.73	3.81	0	1.62	1.31	0.0284524	-2.223	down
F01_cb14197_c0/f1p0/1212	3	2	2	32	44	41	0.24	0.12	0.11	2.32	3.34	3.2	7.35137e-07	4.56829	up
F01_cb14197_c1/f1p0/1996	9	1	0	20	16	19	0.32	0.05	0	0.79	0.65	0.83	0.0319581	2.85601	up
F01_cb14250_c2/f1p0/1042	2	7	6	44	39	20	0.16	0.47	0.39	3.8	3.57	1.88	0.000411095	3.31147	up
F01_cb14260_c2/f1p0/1341	0	0	7	35	26	14	0	0	0.37	2.28	1.76	1.01	0.0004816	4.04572	up
F01_cb14310_c1/f1p0/2090	43	42	50	93	114	114	1.47	1.23	1.41	3.45	4.41	4.59	0.00169831	1.77819	up
F01_cb1432_c1/f1p0/3798	217	201	241	68	26	101	4.33	3.44	4	1.49	0.61	2.42	0.0272321	-1.23268	down
F01_cb1434_c10/f3p0/1848	56	83	81	19	11	3	2.18	2.73	2.59	0.84	0.5	0.16	0.00722423	-2.25204	down
F01_cb14361_c1/f1p0/1468	274	318	410	56	86	130	13.86	13.74	17.26	3.12	5.04	7.87	0.00414438	-1.32491	down
F01_cb14576_c2/f1p0/1768	328	365	338	146	93	83	13.27	12.65	11.36	6.52	4.34	4.02	0.0252513	-1.18315	down
F01_cb1460_c6/f1p1/3054	31	92	100	0	0	15	0.72	1.78	1.88	0	0	0.41	0.00573613	-3.26597	down
F01_cb14634_c0/f1p0/1507	81	111	110	0	0	0	4.01	4.68	4.48	0	0	0	2.59432e-15	#NAME?	down
F01_cb14662_c1/f1p0/1627	62	77	100	14	24	6	2.78	2.97	3.72	0.7	1.24	0.32	0.0198271	-1.91107	down
F01_cb14694_c2/f1p0/1485	48	71	101	154	181	167	2.41	3.06	4.19	8.47	10.5	9.99	0.000293603	1.74053	up
F01_cb14720_c1/f1p0/1776	13	13	15	63	49	30	0.52	0.45	0.5	2.78	2.26	1.44	0.00498801	2.29249	up
F01_cb14768_c0/f1p0/765	106	56	81	6	8	7	12.99	5.79	8.27	0.81	1.16	1.03	0.000219065	-3.0248	down
F01_cb14841_c27/f1p0/766	43	43	94	10	9	10	5.25	4.5	9.57	1.34	1.37	1.49	0.025754	-2.08344	down
F01_cb14890_c4/f4p1/1242	120	107	220	58	3	0	7.49	5.7	11.45	4.03	0.23	0	0.0216036	-2.43571	down
F01_cb14896_c14/f1p0/985	332	339	335	1357	1059	878	27.66	23.99	23.26	124.57	103.26	87.52	1.98523e-06	2.21241	up
F01_cb14906_c17/f1p0/1035	726	1605	823	2	3	6	60.92	114.38	57.4	0.21	0.33	0.63	1.78627e-10	-7.61394	down
F01_cb14906_c4/f2p0/1023	10991	21089	16528	50	18	21	952.15	1551.2	1190.78	4.82	1.87	2.27	9.92156e-06	-8.60013	down
F01_cb14906_c6/f1p0/952	267	695	658	0	3	0	23.75	52.48	48.72	0	0.38	0	5.29941e-14	-8.49424	down
F01_cb1494_c59/f1p0/2009	171	149	110	32	47	25	6.64	4.97	3.56	1.37	2.13	1.17	0.0129483	-1.55107	down
F01_cb14968_c1/f3p0/853	53	77	124	29	7	5	5.51	6.83	10.76	3.39	0.86	0.62	0.0143174	-2.14322	down
F01_cb1497_c22/f1p0/3457	67	44	80	0	0	0	1.31	0.74	1.28	0	0	0	1.68555e-10	#NAME?	down
F01_cb1498_c10/f1p0/3613	259	202	277	81	66	62	4.94	3.31	4.38	1.71	1.46	1.42	0.0130943	-1.31179	down
F01_cb15017_c24/f1p1/945	175	167	255	266	339	357	15.79	12.77	19.11	26.35	35.81	38.38	0.0137572	1.23001	up
F01_cb15051_c0/f1p0/1309	410	279	418	77	114	111	23.78	13.83	20.18	4.97	7.7	7.74	0.0037172	-1.34619	down
F01_cb15069_c105/f1p0/561	4255	3178	2842	1	3	1	979.35	606.58	545.66	0.35	1.07	0.32	6.05772e-33	-10.4939	down
F01_cb15069_c123/f1p0/678	9533	8714	8457	3	0	0	1923.88	1465.27	1423.18	0.75	0	0	1.05236e-20	-12.724	down
F01_cb15069_c69/f1p0/626	3814	2348	3023	120	108	61	622.54	321.35	411.12	21.62	21.17	12.06	3.31686e-12	-4.50362	down
F01_cb15080_c9/f6p0/1312	1250	1372	1580	268	146	190	72.72	68.09	76.4	17.17	9.89	13.28	4.14493e-07	-2.29024	down
F01_cb15126_c45/f1p1/1445	116	65	72	140	170	123	6.41	3.09	3.33	8.48	10.84	8.1	0.0202424	1.26663	up
F01_cb15126_c9/f8p0/1474	1416	721	1666	309	358	219	71.28	31	69.71	17.17	20.91	13.25	0.0456941	-1.58475	down
F01_cb15147_c10/f1p1/1184	177	146	119	37	48	30	11.8	8.27	6.6	2.72	3.71	2.4	0.0231602	-1.44572	down
F01_cb15147_c3/f1p0/1035	215	154	186	624	259	365	17.05	10.4	12.23	54.35	24	34.6	0.0374568	1.65074	up
F01_cb15147_c5/f1p0/1091	767	1100	668	247	203	117	56.64	69.18	41.06	20.16	17.53	10.39	0.00231768	-1.67003	down
F01_cb15147_c8/f1p0/1346	87	84	51	13	10	7	4.93	4.07	2.43	0.85	0.66	0.51	0.00294398	-2.41188	down
F01_cb15216_c16/f2p0/1127	390	499	679	246	84	89	27.46	29.93	39.72	19.09	6.91	7.57	0.00743483	-1.40695	down
F01_cb15238_c4/f1p0/1388	124	87	94	24	19	12	6.76	4.06	4.26	1.45	1.2	0.78	0.0050649	-1.98903	down
F01_cb15238_c7/f1p0/1392	1596	1520	722	361	137	120	95.9	77.87	36.05	23.9	9.59	8.67	0.0451139	-2.1912	down
F01_cb15269_c11/f1p0/467	51	47	50	0	0	0	15.83	11.93	12.84	0	0	0	1.8994e-08	#NAME?	down
F01_cb15272_c1/f2p0/617	489	375	327	72	70	81	85.6	54.94	47.75	13.95	14.76	17	0.000394431	-1.91738	down
F01_cb15272_c4/f1p0/957	740	481	516	119	149	116	81.68	44.93	47.36	14.48	19.46	15.41	0.00748268	-1.67749	down
F01_cb15321_c5/f3p0/1424	130	207	206	375	217	226	6.87	9.3	9.03	21.71	13.22	14.21	0.0328184	1.10417	up
F01_cb15339_c0/f3p0/1118	23	57	31	113	71	72	1.64	3.47	1.84	8.9	5.92	6.16	0.00711664	1.71317	up
F01_cb15430_c32/f1p1/1505	4413	3095	3488	2	0	0	232.18	139.07	152.5	0.16	0	0	1.76531e-41	-12.0349	down
F01_cb15450_c13/f1p1/1142	199	275	315	68	59	73	13.99	16.43	18.41	5.28	4.83	6.2	0.00284644	-1.44559	down
F01_cb15489_c2/f3p0/1548	369	670	608	1233	979	827	17.52	27.16	23.96	64.43	53.76	46.95	0.0133132	1.4052	up
F01_cb15511_c11/f2p0/1172	103	162	204	2	0	0	6.93	9.27	11.42	0.21	0	0	5.26899e-20	-7.44391	down
F01_cb15511_c5/f1p0/1092	360	406	383	0	0	0	27.49	26.34	24.29	0	0	0	1.93493e-42	#NAME?	down
F01_cb15518_c0/f3p0/583	144	104	182	18	18	0	28.03	16.91	29.54	3.85	4.38	0	1.03192e-07	-3.08973	down
F01_cb15525_c4/f1p0/1517	44	67	23	328	254	227	2.16	2.83	0.95	17.75	14.43	13.32	3.50134e-14	3.07688	up
F01_cb1556_c2/f1p0/3637	56	43	23	7	2	0	1.07	0.71	0.38	0.15	0.06	0	0.0136563	-3.36003	down
F01_cb15570_c16/f1p1/728	42	57	71	134	123	147	5.77	6.53	7.99	19.99	19.8	23.81	0.00048905	1.78746	up
F01_cb15570_c21/f4p2/771	131	204	89	275	317	309	15.97	20.89	9.06	36.78	45.55	44.85	0.00019557	1.59472	up
F01_cb1557_c9/f1p1/1945	186	51	315	0	11	3	6.74	1.58	9.47	0	0.49	0.16	0.0133797	-4.71384	down
F01_cb155_c7/f1p2/3192	305	321	243	45	48	77	6.33	5.72	4.18	1.04	1.15	1.92	3.51193e-05	-1.83368	down
F01_cb15625_c0/f49p1/1265	11	37	38	69	69	60	0.7	1.94	1.93	4.65	4.89	4.43	0.0226854	1.75672	up
F01_cb15625_c17/f1p0/1292	20	50	59	126	66	105	1.3	2.7	3.08	8.64	4.82	7.86	0.0035319	1.74576	up
F01_cb15625_c2/f2p1/1219	11	15	35	78	33	52	0.72	0.86	1.87	5.56	2.49	4.05	0.0167996	1.96275	up
F01_cb15634_c18/f1p0/940	511	677	628	0	0	0	54.08	60.63	55.24	0	0	0	1.59679e-51	#NAME?	down
F01_cb15695_c28/f1p0/751	183	80	119	0	0	0	23.38	8.61	12.73	0	0	0	4.95611e-08	#NAME?	down
F01_cb15736_c48/f10p1/1183	3806	5505	5246	43	13	93	252.74	311.43	289.54	3.19	1.08	7.44	3.14086e-17	-6.06483	down
F01_cb1575_c32/f1p0/1099	122	167	143	0	16	10	8.94	10.4	8.75	0	1.38	0.9	1.61533e-09	-3.48351	down
F01_cb15780_c1/f1p0/864	4	323	49	7046	1706	4604	0.46	31.6	4.72	898.62	233.54	637.66	4.82477e-05	5.65635	up
F01_cb15787_c2/f1p0/620	25	23	24	1	1	0	4.45	3.38	3.49	0.19	0.21	0	0.00399554	-4.6943	down
F01_cb15796_c1/f1p0/1444	66	169	107	221	146	261	3.52	7.63	4.72	12.89	8.97	16.5	0.0398185	1.40871	up
F01_cb15850_c7/f1p0/1654	1186	273	604	8	14	6	56.69	11.16	24.02	0.47	0.82	0.35	0.0123914	-5.72354	down
F01_cb15851_c291/f1p3/1466	517	636	550	1872	1765	1413	26.22	27.56	23.21	104.57	103.69	85.76	0.000289251	2.07831	up
F01_cb15877_c4/f1p0/568	17	52	34	135	64	92	3.56	8.66	5.76	29.66	15.51	22.02	0.00118633	2.01621	up
F01_cb15895_c0/f1p0/861	76	48	47	138	122	112	7.8	4.24	4.05	15.64	14.84	13.84	0.00228432	1.60712	up
F01_cb15895_c3/f1p0/1263	11	0	5	35	34	14	0.71	0	0.29	2.38	2.48	1.04	0.00648775	2.82054	up
F01_cb15968_c10/f1p0/1471	40	132	74	338	157	397	2.07	5.81	3.2	19.22	9.37	24.51	0.0167996	2.39021	up
F01_cb15988_c1/f1p0/710	13	7	19	71	44	50	1.79	0.81	2.18	10.81	7.23	8.34	0.000497084	2.59968	up
F01_cb15988_c3/f1p0/868	6	9	20	38	37	41	0.61	0.77	1.69	4.33	4.42	4.97	0.0156276	2.29778	up
F01_cb16026_c10/f1p1/1147	11	2	7	31	33	47	0.77	0.13	0.45	2.39	2.7	3.89	0.00085139	2.97121	up
F01_cb16030_c0/f2p0/1257	212	185	168	36	51	23	13.02	9.69	8.57	2.43	3.64	1.69	0.000309619	-1.85994	down
F01_cb1603_c6/f1p0/3713	583	460	561	158	122	174	11.37	7.71	9.1	3.4	2.73	4.07	0.00519066	-1.30843	down
F01_cb16069_c4/f1p0/807	40	41	24	100	87	70	4.54	3.95	2.27	12.51	11.71	9.54	0.00399089	1.77633	up
F01_cb16085_c10/f1p0/833	1088	1038	1626	106	358	176	143.95	115.67	179.06	15.57	56.27	27.88	5.89223e-06	-1.99627	down
F01_cb16085_c8/f1p0/755	922	1155	1457	339	477	237	117.57	124.26	154.64	47.69	72.18	36.14	0.033971	-1.21459	down
F01_cb16117_c2/f1p0/588	29	24	61	284	169	383	6.25	4.47	10.96	67.38	44.58	98.62	0.000155798	3.42939	up
F01_cb16117_c5/f1p0/659	30	0	38	168	130	279	4.66	0	4.99	28.79	24.31	51.84	0.000428744	3.62488	up
F01_cb16137_c5/f1p0/1059	95	65	123	137	194	233	7.32	4.29	7.91	11.64	17.41	21.43	0.0145699	1.53807	up
F01_cb16172_c1/f2p0/742	750	657	545	189	226	146	96.43	71.29	58.33	26.77	34.5	22.45	0.00714992	-1.301	down
F01_cb16207_c1/f1p0/949	143	194	191	357	198	327	12.65	14.53	13.99	34.67	20.44	34.53	0.00833794	1.25818	up
F01_cb16263_c4/f1p0/1374	78	88	111	218	236	117	4.28	4.12	5.06	13.18	15.03	7.69	0.00815435	1.562	up
F01_cb16298_c0/f1p0/1027	45	56	71	6	1	5	3.59	3.81	4.72	0.53	0.09	0.5	0.00023972	-3.32788	down
F01_cb16302_c1/f2p0/1347	418	440	429	142	126	128	23.57	21.17	20.06	8.85	8.23	8.66	0.0174859	-1.18853	down
F01_cb16344_c0/f1p1/1251	33	121	123	0	1	3	2.05	6.4	6.34	0	0.12	0.24	0.00012214	-5.4925	down
F01_cb16344_c1/f1p0/1115	208	206	243	17	23	15	14.9	12.59	14.48	1.41	1.93	1.32	2.21537e-10	-3.05552	down
F01_cb1635_c14/f1p0/3327	75	105	74	218	141	172	1.44	1.74	1.18	4.61	3.12	3.95	0.000856165	1.56705	up
F01_cb16428_c29/f15p0/927	82	116	122	21	5	30	7.58	9.14	9.43	2.2	0.56	3.38	0.00339686	-1.98158	down
F01_cb16428_c5/f2p0/779	1928	1655	2008	34	52	0	252.17	182.54	218.73	4.97	8.16	0	6.89438e-29	-5.52796	down
F01_cb16438_c10442/f1p1/2786	84	117	122	0	0	0	2.34	2.78	2.81	0	0	0	3.41261e-16	#NAME?	down
F01_cb16438_c10450/f1p0/3003	337	185	374	48	17	11	7.46	3.52	6.89	1.18	0.44	0.31	1.00969e-05	-3.09133	down
F01_cb16438_c10540/f2p2/4009	138	79	127	6	6	8	2.24	1.1	1.72	0.12	0.12	0.16	8.26946e-08	-3.58701	down
F01_cb16438_c10687/f1p0/2538	10	14	0	46	53	18	0.27	0.33	0	1.39	1.66	0.6	0.0157153	2.73273	up
F01_cb16438_c10787/f1p1/2890	83	113	101	1	0	1	1.93	2.26	1.94	0.03	0	0.03	4.00358e-13	-6.7093	down
F01_cb16438_c10960/f1p2/2696	8728	1903	6518	2	1	3	217.9	40.78	135.14	0.05	0.03	0.09	6.17402e-08	-10.9779	down
F01_cb16438_c10968/f2p0/2527	51	87	37	0	3	6	1.38	2	0.82	0	0.09	0.2	0.00105272	-3.71617	down
F01_cb16438_c10999/f1p6/3691	95	33	327	0	0	0	1.73	0.52	4.94	0	0	0	0.0157973	#NAME?	down
F01_cb16438_c11096/f3p0/2859	86	47	101	9	0	1	2.03	0.95	1.99	0.23	0	0.05	1.13303e-06	-4.12013	down
F01_cb16438_c11114/f1p0/2160	195	24	128	1	0	0	6.61	0.7	3.6	0.05	0	0	0.00823765	-8.0643	down
F01_cb16438_c11263/f1p0/2139	25	33	43	0	0	0	0.83	0.93	1.17	0	0	0	6.23129e-06	#NAME?	down
F01_cb16438_c11491/f3p0/3485	556	560	754	113	80	35	10.48	9.06	11.8	2.35	1.74	0.81	2.20228e-10	-2.53814	down
F01_cb16438_c11639/f2p2/2798	28	45	20	140	73	112	0.68	0.94	0.41	3.71	2.01	3.22	1.45168e-05	2.29588	up
F01_cb16438_c11689/f1p0/3146	6106	6631	7336	837	913	411	148.84	138.68	148.49	22.47	25.58	12.01	0.00855094	-2.706	down
F01_cb16438_c11717/f1p0/3723	98	121	139	25	9	51	1.73	1.83	2.03	0.49	0.2	1.09	0.024208	-1.52888	down
F01_cb16438_c11922/f1p0/3601	419	184	298	43	18	2	7.43	2.81	4.39	0.85	0.38	0.06	0.00210324	-3.40498	down
F01_cb16438_c11962/f1p0/1741	55	43	38	0	0	0	2.34	1.58	1.35	0	0	0	7.02381e-08	#NAME?	down
F01_cb16438_c12024/f2p1/4103	92	128	98	13	0	28	1.46	1.74	1.29	0.24	0	0.55	0.00021909	-2.42215	down
F01_cb16438_c12196/f1p0/3674	69	90	43	0	0	0	1.46	1.64	0.76	0	0	0	1.53419e-09	#NAME?	down
F01_cb16438_c12239/f1p0/3628	60	108	121	0	0	0	1.12	1.73	1.88	0	0	0	1.11965e-14	#NAME?	down
F01_cb16438_c12371/f1p5/2083	33	23	27	0	0	0	1.11	0.68	0.75	0	0	0	5.41478e-05	#NAME?	down
F01_cb16438_c12402/f1p0/1893	587	921	1409	166	172	293	22.52	30.27	44.92	7.03	7.62	13.48	0.0170782	-1.64176	down
F01_cb16438_c12445/f1p0/2519	185	84	113	24	0	0	5	1.95	2.53	0.72	0	0	0.00625307	-3.61648	down
F01_cb16438_c12673/f1p0/2679	120	53	162	14	5	7	3.13	1.19	3.51	0.42	0.15	0.24	0.00334492	-3.18997	down
F01_cb16438_c1324/f1p0/1853	57	48	82	172	122	119	2.19	1.58	2.61	7.27	5.4	5.47	0.00113658	1.66114	up
F01_cb16438_c13243/f1p0/1681	136	177	285	0	0	0	5.84	6.51	10.17	0	0	0	5.0659e-20	#NAME?	down
F01_cb16438_c13405/f1p0/1648	6893	4357	4461	2	0	2	303.08	163.85	162.98	0.1	0	0.13	1.35883e-26	-11.4631	down
F01_cb16438_c13552/f1p0/2266	0	2	1	37	23	23	0	0.06	0.03	1.25	0.82	0.84	5.25022e-06	5.3326	up
F01_cb16438_c1389/f1p0/1838	24	77	78	0	0	0	0.95	2.6	2.56	0	0	0	1.75419e-06	#NAME?	down
F01_cb16438_c14050/f1p0/1820	27	62	43	0	0	0	1.09	2.09	1.41	0	0	0	1.39122e-07	#NAME?	down
F01_cb16438_c14301/f1p0/1962	0	20	8	46	20	31	0	0.66	0.25	1.9	0.87	1.4	0.0244562	2.32642	up
F01_cb16438_c14399/f1p0/2179	201	179	126	17	43	39	6.4	4.88	3.34	0.59	1.57	1.48	0.00366764	-1.83242	down
F01_cb16438_c14726/f1p2/2506	24	126	37	0	0	0	0.66	2.95	0.85	0	0	0	0.0306762	#NAME?	down
F01_cb16438_c15001/f1p0/2568	74	42	105	19	0	0	2.12	1.02	2.49	0.6	0	0	0.00260766	-3.12137	down
F01_cb16438_c15109/f4p0/1723	729	807	635	182	216	132	30.41	28.82	22.01	8.4	10.42	6.61	0.0006347	-1.52956	down
F01_cb16438_c15179/f1p0/2166	24	21	57	0	0	0	0.81	0.6	1.55	0	0	0	6.57225e-05	#NAME?	down
F01_cb16438_c1526/f1p0/3144	34	23	31	6	0	0	0.8	0.47	0.6	0.16	0	0	0.0126208	-3.47828	down
F01_cb16438_c1544/f1p2/1984	10	4	9	64	39	115	0.37	0.12	0.26	2.47	1.6	4.82	0.0144267	3.76583	up
F01_cb16438_c15685/f1p0/2361	544	303	537	55	157	98	16.08	7.68	13.19	1.79	5.36	3.47	0.0217179	-1.62326	down
F01_cb16438_c15891/f1p0/3810	156	113	158	25	35	53	2.69	1.69	2.27	0.47	0.7	1.1	0.0311646	-1.38169	down
F01_cb16438_c15892/f1p3/3665	51	141	78	0	0	0	0.95	2.22	1.18	0	0	0	1.04661e-06	#NAME?	down
F01_cb16438_c15900/f1p0/3685	46	26	48	0	0	1	0.83	0.4	0.71	0	0	0.04	3.90989e-06	-6.31886	down
F01_cb16438_c16302/f1p0/1818	13	16	22	84	64	39	0.51	0.56	0.74	3.62	2.92	1.86	0.000744635	2.39067	up
F01_cb16438_c16327/f1p0/2469	153	43	337	1	0	0	4.28	1.03	7.86	0.03	0	0	0.0019655	-8.61274	down
F01_cb16438_c16508/f1p0/2617	182	188	331	64	86	64	4.68	4.15	7.07	1.82	2.56	1.99	0.0357401	-1.16573	down
F01_cb16438_c16691/f1p3/2746	69	58	97	154	124	172	1.7	1.24	1.97	4.16	3.49	5.06	0.00268666	1.53773	up
F01_cb16438_c16714/f1p0/1868	300	336	394	51	41	39	11.77	11.28	12.83	2.22	1.89	1.87	5.31059e-09	-2.4578	down
F01_cb16438_c17388/f1p0/2087	82	72	163	23	0	0	2.97	2.22	4.86	0.92	0	0	0.000757932	-3.35063	down
F01_cb16438_c17453/f1p0/2898	42	24	56	84	94	59	0.98	0.48	1.09	2.16	2.51	1.66	0.0417884	1.48074	up
F01_cb16438_c17948/f1p0/2738	88	144	129	27	44	21	2.18	3.04	2.64	0.75	1.25	0.64	0.0421661	-1.44038	down
F01_cb16438_c1825/f1p0/2061	157	165	181	10	28	10	5.24	4.72	5.02	0.39	1.08	0.42	6.50228e-08	-2.8551	down
F01_cb16438_c1828/f1p0/2068	24	17	26	88	79	66	0.81	0.49	0.73	3.25	3.07	2.65	0.000250111	2.30795	up
F01_cb16438_c18312/f1p0/2752	377	323	575	39	23	19	9.18	6.73	11.6	1.05	0.67	0.58	1.52745e-13	-3.46718	down
F01_cb16438_c1900/f1p0/1614	37	53	55	5	0	2	1.67	2.04	2.06	0.25	0	0.11	0.000135281	-3.89951	down
F01_cb16438_c1903/f1p0/3295	99	125	120	13	14	0	2.08	2.26	2.1	0.3	0.34	0	9.27895e-07	-3.18293	down
F01_cb16438_c19087/f2p1/1992	17	49	61	0	0	0	0.61	1.5	1.79	0	0	0	1.10062e-05	#NAME?	down
F01_cb16438_c19167/f1p0/3116	385	320	378	71	100	102	8.11	5.8	6.62	1.67	2.43	2.59	0.00118275	-1.46224	down
F01_cb16438_c1918/f1p0/2280	37	32	53	0	0	0	1.18	0.86	1.39	0	0	0	4.53575e-07	#NAME?	down
F01_cb16438_c1919/f1p0/1772	16	19	18	51	40	69	0.65	0.69	0.6	2.29	1.87	3.38	0.00758538	2.1197	up
F01_cb16438_c19217/f1p0/2639	7	11	2	27	45	27	0.18	0.24	0.04	0.77	1.32	0.83	0.00325762	2.79774	up
F01_cb16438_c1924/f1p0/1632	1	4	8	84	122	134	0.04	0.15	0.3	4.12	6.27	7.13	7.76373e-15	5.31038	up
F01_cb16438_c1925/f3p0/1928	250	495	207	23	23	25	9.15	15.52	6.3	0.93	1.01	1.09	0.00560062	-3.23295	down
F01_cb16438_c19325/f1p0/2407	34	26	47	5	0	4	0.97	0.64	1.11	0.19	0	0.17	0.01047	-3.06968	down
F01_cb16438_c19446/f2p1/3955	223	198	279	0	0	0	3.69	2.83	3.84	0	0	0	7.65993e-31	#NAME?	down
F01_cb16438_c19572/f2p0/1964	138	158	189	0	0	0	4.93	4.84	5.61	0	0	0	4.53792e-23	#NAME?	down
F01_cb16438_c19823/f1p0/3311	443	477	516	23	25	18	9.21	8.52	8.9	0.53	0.6	0.47	7.37866e-21	-3.92651	down
F01_cb16438_c19930/f3p0/3479	56	35	79	0	0	0	1.1	0.59	1.28	0	0	0	1.80014e-09	#NAME?	down
F01_cb16438_c2018/f1p0/2849	23	33	17	53	85	63	0.57	0.7	0.35	1.44	2.41	1.86	0.00517801	1.97538	up
F01_cb16438_c20598/f1p0/2593	4	17	5	38	46	54	0.1	0.38	0.11	1.09	1.38	1.69	0.000276621	2.94045	up
F01_cb16438_c20734/f1p1/3701	131	136	186	0	0	0	2.39	2.13	2.82	0	0	0	9.72199e-22	#NAME?	down
F01_cb16438_c20907/f1p0/3228	381	271	288	1	0	0	7.92	4.84	4.99	0.03	0	0	1.08539e-24	-9.48858	down
F01_cb16438_c21193/f1p0/2451	99	60	191	0	0	0	3.02	1.59	4.86	0	0	0	2.35433e-07	#NAME?	down
F01_cb16438_c21356/f1p0/3410	62	82	88	0	6	0	1.2	1.37	1.42	0	0.14	0	2.80363e-08	-4.70807	down
F01_cb16438_c21359/f1p2/2680	111	90	59	193	97	170	2.81	1.95	1.25	5.34	2.82	5.13	0.0421661	1.30093	up
F01_cb16438_c21836/f1p0/2922	102	67	51	134	191	118	2.33	1.33	0.98	3.37	5.03	3.24	0.00976856	1.49642	up
F01_cb16438_c2213/f2p0/2011	450	201	640	79	51	26	15.67	6	18.5	3.03	2.08	1.11	0.0225086	-2.54761	down
F01_cb16438_c22772/f1p0/2960	302	236	363	128	98	39	6.9	4.63	6.89	3.22	2.58	1.08	0.0147639	-1.27137	down
F01_cb16438_c22938/f1p0/2027	361	223	434	19	115	86	12.39	6.58	12.38	0.72	4.57	3.57	0.0199202	-1.64916	down
F01_cb16438_c23583/f1p0/1690	31	215	745	0	0	0	1.36	7.9	26.61	0	0	0	0.0246918	#NAME?	down
F01_cb16438_c23649/f1p1/2077	65	55	88	0	0	0	2.18	1.58	2.48	0	0	0	2.91711e-11	#NAME?	down
F01_cb16438_c23739/f1p0/1753	989	756	830	0	0	14	40.41	26.45	28.18	0	0	0.71	7.11651e-38	-6.94471	down
F01_cb16438_c23963/f1p0/3025	18	1	0	46	22	27	0.52	0.04	0	1.47	0.73	0.94	0.00390357	2.69253	up
F01_cb16438_c23970/f1p0/2787	74	49	85	17	10	0	1.79	1.01	1.71	0.46	0.3	0	0.0035341	-2.48115	down
F01_cb16438_c24061/f1p3/2252	40	62	41	0	0	0	1.24	1.62	1.05	0	0	0	3.50531e-08	#NAME?	down
F01_cb16438_c24138/f1p0/2659	58	60	71	0	0	0	1.47	1.31	1.49	0	0	0	2.08898e-10	#NAME?	down
F01_cb16438_c24586/f1p1/2816	105	89	65	22	0	0	2.51	1.83	1.3	0.58	0	0	0.000162374	-3.17626	down
F01_cb16438_c24603/f1p0/2775	136	93	111	10	0	0	3.25	1.92	2.22	0.27	0	0	9.99447e-11	-4.69632	down
F01_cb16438_c24629/f1p0/2339	87	60	83	145	102	127	2.57	1.52	2.05	4.71	3.47	4.49	0.0496389	1.20581	up
F01_cb16438_c24668/f1p0/4007	390	329	337	3	0	6	7.06	5.12	5.06	0.08	0	0.15	3.17522e-32	-6.35379	down
F01_cb16438_c2521/f1p0/1629	95	100	96	322	266	291	4.24	3.81	3.56	15.81	13.71	15.57	2.17781e-07	2.10527	up
F01_cb16438_c2571/f4p2/2178	552	812	757	238	112	154	17.53	22.09	19.96	8.34	4.12	5.87	0.000399883	-1.56684	down
F01_cb16438_c2577/f1p0/1846	85	236	166	1	0	0	3.41	8.04	5.5	0.04	0	0	6.10139e-09	-8.50389	down
F01_cb16438_c2587/f1p1/2109	27	37	22	1	6	0	0.9	1.07	0.63	0.04	0.26	0	0.0234777	-3.09614	down
F01_cb16438_c2658/f1p0/3369	69	86	81	138	163	196	1.51	1.61	1.47	3.3	4.05	5.09	0.000998409	1.60645	up
F01_cb16438_c2659/f1p0/3046	106	152	143	228	288	324	2.36	2.9	2.64	5.56	7.34	8.59	0.000272504	1.60488	up
F01_cb16438_c2695/f1p0/1821	37	21	45	0	3	0	1.46	0.71	1.45	0	0.14	0	0.000331851	-4.54204	down
F01_cb16438_c2767/f1p0/2085	52	125	88	0	5	3	1.76	3.6	2.46	0	0.2	0.13	3.26945e-06	-4.46725	down
F01_cb16438_c2804/f4p4/2707	73	258	143	0	0	15	1.83	5.51	2.96	0	0	0.46	0.00529559	-4.37456	down
F01_cb16438_c2830/f1p0/2573	0	23	0	41	18	36	0	0.54	0	1.2	0.55	1.16	0.0186613	2.5526	up
F01_cb16438_c30469/f9p0/2292	33	24	49	11	0	0	1.02	0.63	1.22	0.39	0	0	0.0254522	-2.84824	down
F01_cb16438_c30555/f6p7/2635	101	47	89	9	0	14	2.59	1.04	1.9	0.26	0	0.45	0.0026768	-2.85581	down
F01_cb16438_c30749/f4p2/2595	577	764	735	71	344	126	15.05	17.09	15.91	2.05	10.32	3.94	0.019684	-1.38982	down
F01_cb16438_c3126/f1p1/2232	191	222	236	71	34	62	5.88	5.87	6.04	2.42	1.21	2.31	0.00597497	-1.44638	down
F01_cb16438_c31898/f4p0/1953	81	63	122	9	30	0	2.92	1.97	3.67	0.36	1.25	0	0.00426711	-2.23315	down
F01_cb16438_c32661/f2p0/2840	1465	1696	1355	392	352	247	34.53	34.31	26.53	10.18	9.54	6.98	0.00126458	-1.68848	down
F01_cb16438_c33143/f1p0/1814	65	75	73	19	9	0	2.59	2.52	2.4	0.86	0.43	0	0.00341546	-2.47165	down
F01_cb16438_c3354/f1p0/2340	96	92	144	14	25	44	2.81	2.31	3.5	0.45	0.84	1.54	0.0475589	-1.43556	down
F01_cb16438_c33733/f4p0/2662	252	288	287	86	114	43	6.41	6.27	6.05	2.4	3.32	1.33	0.0163143	-1.25544	down
F01_cb16438_c33803/f1p0/1731	234	177	213	62	25	62	9.72	6.3	7.37	2.86	1.22	3.09	0.00266336	-1.56504	down
F01_cb16438_c33926/f6p4/1762	159	109	283	0	3	0	6.5	3.8	9.57	0.01	0.18	0	1.98646e-09	-6.94199	down
F01_cb16438_c34179/f1p1/3346	325	345	404	6	12	5	6.46	5.9	6.67	0.15	0.28	0.12	6.24608e-26	-5.01475	down
F01_cb16438_c3453/f1p0/2040	24	18	43	103	59	122	0.83	0.54	1.25	3.91	2.36	5.02	0.00198411	2.28325	up
F01_cb16438_c34763/f1p0/1678	19	58	72	140	71	80	0.84	2.15	2.6	6.73	3.57	4.19	0.0421661	1.5042	up
F01_cb16438_c34920/f1p0/2752	22	19	16	32	67	50	0.54	0.41	0.33	0.87	1.89	1.46	0.0266497	1.90459	up
F01_cb16438_c35063/f1p0/1758	9	5	17	51	77	53	0.41	0.18	0.6	2.35	3.72	2.67	1.58994e-05	3.09939	up
F01_cb16438_c35489/f1p0/2040	573	667	702	1	0	0	19.61	19.56	19.96	0.04	0	0	3.93352e-51	-10.5135	down
F01_cb16438_c35598/f1p0/1946	35	40	24	0	0	0	1.4	1.37	0.82	0	0	0	6.61704e-06	#NAME?	down
F01_cb16438_c35637/f1p0/2014	183	228	161	40	34	43	6.37	6.81	4.65	1.54	1.39	1.81	0.000557655	-1.77927	down
F01_cb16438_c35865/f1p1/2037	28	25	22	0	0	0	0.99	0.75	0.65	0.03	0	0	0.000159914	#NAME?	down
F01_cb16438_c36243/f1p0/2570	156	106	201	20	5	8	4.16	2.42	4.44	0.6	0.18	0.27	4.87728e-09	-3.32726	down
F01_cb16438_c36311/f1p0/2880	43	105	70	304	105	229	1.05	2.19	1.42	8.15	2.96	6.68	0.0376406	2.06126	up
F01_cb16438_c36313/f1p0/1855	181	125	262	38	41	50	7.5	4.46	9.02	1.77	1.98	2.48	0.00509122	-1.59804	down
F01_cb16438_c36501/f1p1/2992	45	37	59	8	2	1	1.01	0.71	1.1	0.21	0.05	0.03	0.00167082	-3.22066	down
F01_cb16438_c36664/f1p0/2176	47	47	128	0	0	0	1.63	1.4	3.69	0	0	0	1.34438e-05	#NAME?	down
F01_cb16438_c37500/f1p0/3808	558	619	736	116	207	260	9.78	9.32	10.71	2.25	4.17	5.46	0.0163707	-1.16377	down
F01_cb16438_c3806/f4p5/2622	712	1309	1559	184	174	255	18.34	28.92	33.36	5.25	5.17	7.88	0.000135281	-1.99187	down
F01_cb16438_c38065/f1p0/1808	14	16	9	38	38	42	0.58	0.57	0.31	1.71	1.76	2.04	0.0245463	2.09835	up
F01_cb16438_c38165/f5p0/2639	298	166	294	55	32	59	7.62	3.65	6.26	1.56	0.97	1.83	0.00269153	-1.86645	down
F01_cb16438_c38375/f1p0/1608	0	0	0	151	140	64	0	0	0	7.57	7.35	3.52	2.86736e-15	Inf	up
F01_cb16438_c38645/f1p0/1842	43	51	88	156	93	109	1.69	1.68	2.83	6.65	4.16	5.03	0.00816092	1.50708	up
F01_cb16438_c38668/f1p0/2005	35	49	37	0	0	0	1.23	1.48	1.08	0	0	0	4.69299e-07	#NAME?	down
F01_cb16438_c3877/f1p0/2300	0	20	4	33	28	31	0	0.52	0.12	1.08	0.99	1.11	0.0178973	2.47489	up
F01_cb16438_c38967/f1p0/1900	472	322	587	100	47	4	18.03	10.53	18.63	4.22	2.08	0.21	9.62666e-07	-2.7286	down
F01_cb16438_c39061/f1p0/3168	39	59	98	21	3	12	0.83	1.06	1.69	0.49	0.07	0.31	0.043157	-1.9271	down
F01_cb16438_c39594/f1p0/2987	517	397	572	8	9	7	11.54	7.6	10.6	0.21	0.24	0.21	8.76055e-32	-5.43461	down
F01_cb16438_c40415/f1p0/1644	145	97	117	18	43	14	6.46	3.68	4.31	0.92	2.24	0.77	0.00748268	-1.74678	down
F01_cb16438_c40428/f1p0/2306	189	254	249	63	44	27	5.58	6.41	6.1	2.06	1.5	0.95	0.000104749	-1.86723	down
F01_cb16438_c4051/f1p0/2391	29	77	35	195	98	145	0.84	1.9	0.83	6.13	3.24	4.97	0.000105478	2.14049	up
F01_cb16438_c40522/f3p2/2556	740	1034	913	122	100	114	19.61	23.52	20.1	3.56	3.07	3.63	9.18994e-10	-2.48002	down
F01_cb16438_c40528/f1p5/2632	46	48	46	6	1	0	1.19	1.06	1	0.18	0.04	0	0.000197581	-3.89854	down
F01_cb16438_c40654/f1p0/1789	242	353	291	76	99	58	9.79	12.19	9.78	3.38	4.64	2.83	0.00339686	-1.4067	down
F01_cb16438_c40719/f1p0/2179	4	6	9	138	112	128	0.13	0.17	0.24	4.8	4.09	4.84	1.34856e-17	4.85935	up
F01_cb16438_c40790/f1p0/1562	78	143	113	10	4	13	3.7	5.8	4.44	0.57	0.25	0.76	1.80079e-06	-3.09946	down
F01_cb16438_c40884/f1p0/2541	181	177	206	50	64	19	4.84	4.05	4.57	1.48	1.96	0.61	0.00361073	-1.57725	down
F01_cb16438_c41040/f1p0/1666	548	528	923	0	9	0	25.31	20.84	35.38	0	0.52	0	3.63298e-29	-7.22075	down
F01_cb16438_c41092/f1p0/3639	0	7	0	21	33	30	0	0.12	0	0.42	0.7	0.66	0.000111205	4.11679	up
F01_cb16438_c41093/f1p0/2606	231	165	255	34	74	47	6.24	3.82	5.73	1.03	2.32	1.52	0.00218119	-1.53595	down
F01_cb16438_c41630/f1p0/2412	53	11	24	100	172	163	1.53	0.28	0.58	3.18	5.73	5.62	2.49367e-05	2.79309	up
F01_cb16438_c41690/f1p0/2706	97	107	146	11	15	1	2.4	2.27	3.01	0.31	0.45	0.04	6.75469e-07	-3.18544	down
F01_cb16438_c41895/f1p0/1961	32	24	94	0	0	0	1.17	0.75	2.83	0	0	0	0.00229017	#NAME?	down
F01_cb16438_c42558/f1p0/2277	42	51	40	92	134	82	1.29	1.32	1.02	3.07	4.69	2.99	0.00279735	1.72713	up
F01_cb16438_c42673/f2p1/2227	798	604	736	106	99	102	24.74	16.05	18.95	3.62	3.54	3.79	1.20626e-08	-2.29102	down
F01_cb16438_c43521/f1p0/1842	364	225	180	22	15	18	14.33	7.58	5.89	0.95	0.68	0.85	0.00186902	-3.33177	down
F01_cb16438_c43841/f1p0/2176	148	56	111	15	0	16	5.22	1.7	3.27	0.61	0	0.68	0.0291608	-2.86142	down
F01_cb16438_c43876/f1p0/3053	457	287	483	0	0	0	9.91	5.35	8.7	0	0	0	1.22508e-28	#NAME?	down
F01_cb16438_c4461/f2p0/2721	396	416	281	134	97	92	9.8	8.82	5.79	3.67	2.77	2.73	0.0112984	-1.27101	down
F01_cb16438_c4464/f1p0/2462	20	25	21	0	0	0	0.55	0.61	0.5	0	0	0	0.000578496	#NAME?	down
F01_cb16438_c4468/f1p0/1840	194	204	324	0	0	0	7.46	6.71	10.35	0	0	0	2.01966e-31	#NAME?	down
F01_cb16438_c44781/f1p0/2263	1459	1123	1086	9	10	4	45.45	30	28.1	0.34	0.37	0.17	2.02434e-28	-6.83032	down
F01_cb16438_c45042/f1p0/1922	27	26	48	5	0	1	1	0.84	1.48	0.22	0	0.07	0.00414438	-3.61263	down
F01_cb16438_c45143/f1p0/2167	5118	3683	4089	54	34	57	174.2	107.39	115.61	2.03	1.35	2.36	2.34934e-18	-5.97335	down
F01_cb16438_c45186/f1p0/3468	188	159	162	61	23	21	3.58	2.6	2.56	1.29	0.52	0.5	0.00123182	-1.81083	down
F01_cb16438_c45205/f1p0/2936	6	5	10	25	33	25	0.15	0.1	0.19	0.64	0.86	0.7	0.0231379	2.52544	up
F01_cb16438_c45366/f1p0/3045	82	75	65	7	11	3	1.8	1.41	1.19	0.18	0.29	0.09	0.000236993	-2.90446	down
F01_cb16438_c45540/f1p0/2818	82	106	144	229	348	276	2	2.19	2.9	6.1	9.65	8	1.5692e-05	1.90967	up
F01_cb16438_c45691/f1p0/1818	27	65	51	0	0	15	1.08	2.16	1.65	0	0	0.72	0.016288	-2.64358	down
F01_cb16438_c46077/f1p1/1960	132	51	72	0	0	0	4.74	1.59	2.15	0	0	0	2.47779e-05	#NAME?	down
F01_cb16438_c46395/f2p0/3319	59	49	72	3	4	0	1.18	0.84	1.2	0.07	0.09	0	5.762e-06	-4.1873	down
F01_cb16438_c4745/f1p0/2977	525	537	470	147	179	81	11.76	10.32	8.74	3.64	4.61	2.17	0.00201811	-1.41125	down
F01_cb16438_c4748/f1p0/2953	714	543	828	99	250	224	16.71	10.9	16.08	2.57	6.73	6.3	0.00401947	-1.31668	down
F01_cb16438_c4771/f1p0/2976	35	51	20	162	91	171	0.87	1.07	0.41	4.37	2.56	4.99	3.22444e-05	2.4929	up
F01_cb16438_c47891/f2p0/2494	117	0	11	251	203	311	3.21	0	0.25	7.54	6.38	10.16	2.70373e-07	2.99149	up
F01_cb16438_c4845/f5p0/2038	571	542	571	170	188	163	19.58	15.93	16.25	6.42	7.43	6.7	0.0185065	-1.17757	down
F01_cb16438_c4919/f1p0/3288	88	71	83	188	179	119	1.81	1.25	1.41	4.24	4.23	2.92	0.00204094	1.50665	up
F01_cb16438_c49728/f2p16/2639	30	55	64	126	78	159	0.77	1.22	1.37	3.56	2.3	4.89	0.0156236	1.83173	up
F01_cb16438_c50230/f8p7/2729	406	210	550	26	14	7	10.02	4.45	11.25	0.72	0.41	0.22	3.93088e-06	-4.14212	down
F01_cb16438_c51952/f1p1/1926	40	65	67	365	140	351	1.48	2.04	2.06	14.76	5.94	15.42	0.0023714	2.84027	up
F01_cb16438_c54562/f2p0/2090	124	67	102	9	4	5	4.16	1.93	2.84	0.34	0.16	0.2	5.89223e-06	-3.54698	down
F01_cb16438_c54702/f3p1/2591	773	221	695	104	33	0	20.18	4.96	15.08	3	1.02	0	0.0421661	-3.19277	down
F01_cb16438_c55374/f2p2/2002	57	44	84	0	21	0	2.02	1.33	2.44	0	0.88	0	0.00272248	-2.57036	down
F01_cb16438_c55577/f2p10/2992	20	41	94	0	0	0	0.46	0.8	1.74	0	0	0	0.00136739	#NAME?	down
F01_cb16438_c55831/f2p5/3730	66	304	177	0	0	0	1.16	4.58	2.58	0	0	0	2.62718e-05	#NAME?	down
F01_cb16438_c58581/f2p6/1934	4541	4973	5198	5	0	0	165.35	155.06	157.23	0.21	0	0	3.25622e-33	-11.1158	down
F01_cb16438_c60202/f1p0/2108	107	212	226	13	27	18	3.72	6.28	6.5	0.5	1.1	0.77	3.19891e-06	-2.6733	down
F01_cb16438_c61105/f2p0/1827	0	0	40	60	30	60	0	0	1.3	2.58	1.37	2.8	0.0202316	2.54909	up
F01_cb16438_c674/f3p0/2953	557	359	398	75	45	31	12.58	6.97	7.48	1.87	1.19	0.85	3.39022e-05	-2.65146	down
F01_cb16438_c7085/f5p0/1842	73	91	126	231	242	214	2.83	3.01	4.04	9.84	10.77	9.91	4.97458e-05	1.78174	up
F01_cb16438_c7160/f8p1/3007	206	288	302	435	410	351	4.57	5.48	5.55	10.6	10.42	9.32	0.0340882	1.11225	up
F01_cb16438_c7320/f2p0/1724	139	87	107	15	23	20	5.8	3.12	3.72	0.69	1.14	1	0.00225971	-2.0083	down
F01_cb16438_c7647/f12p0/1923	37	21	29	5	0	0	1.37	0.67	0.89	0.2	0	0	0.00764317	-3.73246	down
F01_cb16438_c782/f2p1/2451	56	63	72	5	0	5	1.56	1.5	1.66	0.15	0	0.17	1.74875e-05	-3.74775	down
F01_cb16438_c862/f5p0/2023	118	57	95	12	14	9	4.09	1.71	2.74	0.47	0.58	0.38	0.00482066	-2.44883	down
F01_cb16438_c8807/f1p8/2539	38	54	81	0	1	0	1.04	1.24	1.81	0	0.03	0	1.40012e-08	-6.85182	down
F01_cb16438_c8809/f3p0/2530	738	808	1279	18	35	0	19.79	18.58	28.48	0.56	1.08	0	1.11961e-26	-5.20998	down
F01_cb16438_c9042/f3p0/2891	119	66	101	14	26	20	2.77	1.32	1.94	0.36	0.71	0.57	0.0216321	-1.73257	down
F01_cb16438_c9251/f2p0/2080	83	80	105	4	0	2	2.79	2.32	2.92	0.17	0	0.08	1.24241e-09	-5.005	down
F01_cb16438_c9321/f2p0/3179	56	66	66	123	153	134	1.18	1.2	1.15	2.83	3.67	3.34	0.00139336	1.65134	up
F01_cb16438_c9523/f1p3/3731	132	203	255	1	0	0	2.3	3.03	3.69	0.02	0	0	1.48354e-25	-8.77596	down
F01_cb16438_c9799/f1p0/1959	249	343	354	71	47	0	8.94	10.54	10.57	2.84	1.98	0	7.08839e-09	-2.52601	down
F01_cb16438_c9853/f1p2/2136	1	5	0	26	18	25	0.03	0.14	0	0.94	0.68	0.97	0.000644815	4.01457	up
F01_cb16448_c4/f1p2/1023	0	0	0	112	31	244	0	0	0	9.89	2.98	23.51	0.00262169	Inf	up
F01_cb16454_c2/f3p1/648	65	49	61	163	141	132	10.44	6.6	8.16	28.87	27.23	25.41	0.000168629	1.82141	up
F01_cb16458_c1/f1p0/1377	21	46	0	73	50	107	1.15	2.16	0	4.44	3.22	7.03	0.0310413	2.26324	up
F01_cb16460_c2/f1p0/1288	402	450	488	61	85	70	23.95	22.86	24.15	4.04	5.92	5	2.17418e-07	-2.1029	down
F01_cb16498_c20/f1p0/1284	779	469	645	0	0	0	49.2	25.25	33.89	0	0	0	8.86738e-26	#NAME?	down
F01_cb16498_c5/f1p1/1302	83	55	101	6	1	1	4.92	2.81	4.96	0.44	0.07	0.08	8.88313e-08	-4.44687	down
F01_cb16515_c4/f1p0/1219	11	15	14	60	36	56	0.72	0.85	0.78	4.23	2.73	4.31	0.00185509	2.44327	up
F01_cb16548_c8/f1p0/974	24	31	44	131	56	76	2.28	2.46	3.42	13.55	6.2	8.54	0.011628	1.92503	up
F01_cb16570_c0/f15p0/1252	2718	2197	1473	651	335	321	167.79	115.65	75.57	44.26	24.1	23.75	0.0280567	-1.82695	down
F01_cb1657_c3/f1p0/3678	49	63	73	487	726	241	0.87	0.97	1.07	9.48	14.72	5.12	0.00418649	3.49972	up
F01_cb16584_c0/f1p0/1363	6	13	0	49	56	63	0.33	0.62	0	3	3.65	4.24	9.21399e-07	3.62824	up
F01_cb16779_c4/f1p0/472	23	0	13	56	32	32	7.1	0	3.36	18.81	12.47	11.71	0.0132223	2.19191	up
F01_cb16840_c8/f1p0/1306	80	121	122	34	17	0	5.43	6.93	6.83	2.52	1.4	0	0.00142263	-2.19315	down
F01_cb16847_c13/f1p0/1101	38	74	42	339	378	183	2.77	4.55	2.52	26.68	31.47	15.71	2.73031e-06	3.05484	up
F01_cb17007_c1/f1p0/1149	307	197	208	54	45	37	21.2	11.61	11.98	4.14	3.65	3.06	0.00449615	-1.90347	down
F01_cb17051_c2/f2p0/970	702	881	803	5	5	4	60.84	64.87	57.89	0.48	0.51	0.42	8.25541e-44	-6.89774	down
F01_cb17059_c1/f1p0/1009	90	215	173	0	0	0	7.36	14.95	11.77	0	0	0	3.05591e-13	#NAME?	down
F01_cb17064_c0/f2p0/1474	12	13	10	22	48	54	0.61	0.56	0.42	1.23	2.81	3.27	0.0302646	2.35875	up
F01_cb17069_c2/f3p1/790	249	367	241	52	82	67	29	36.14	23.36	6.67	11.38	9.33	0.000734511	-1.56715	down
F01_cb17069_c3/f2p1/829	198	269	256	56	48	56	21.49	24.75	23.12	6.69	6.19	7.27	0.000557612	-1.65217	down
F01_cb17088_c3/f1p0/1584	3	9	5	28	24	48	0.15	0.38	0.2	1.45	1.31	2.66	0.00241948	3.10107	up
F01_cb17089_c0/f10p0/652	96	1477	1005	0	0	0	15.26	196.94	133.07	0	0	0	0.000104905	#NAME?	down
F01_cb17101_c2/f1p0/1025	37	41	95	226	216	405	2.97	2.81	6.34	19.99	20.28	38.91	0.00280028	2.86527	up
F01_cb17132_c0/f3p0/826	176	106	94	231	354	197	19.24	9.87	8.56	27.77	45.69	25.81	0.0363138	1.54515	up
F01_cb17132_c1/f1p0/838	0	15	0	51	40	35	0	1.36	0	6.11	5.15	4.55	2.36341e-05	3.57676	up
F01_cb17147_c0/f7p0/579	174	104	211	24	41	39	34.2	17.05	34.58	5.2	9.89	9.16	0.00485777	-1.69292	down
F01_cb17197_c1/f1p0/1355	72	86	121	5	16	21	4.08	4.1	5.63	0.31	1.04	1.4	0.00218867	-2.15713	down
F01_cb17208_c1/f1p0/437	4	27	9	95	83	113	1.99	8.87	3.22	42.26	42.96	54.96	3.97011e-09	3.39935	up
F01_cb17208_c4/f1p0/862	71	559	462	3962	1749	2573	8.93	58.87	48	543.83	258.44	383.47	9.61308e-07	3.46473	up
F01_cb17222_c6/f1p0/1226	52	48	35	129	130	154	3.3	2.63	1.85	9.07	9.59	11.68	1.2435e-05	2.1163	up
F01_cb17230_c1/f6p1/1390	76	113	161	229	186	161	4.12	5.25	7.28	13.68	11.71	10.48	0.0167271	1.25409	up
F01_cb17246_c2/f1p0/1415	585	907	885	2075	3033	2018	33.77	44.71	42.47	131.95	203.28	139.42	0.00288947	2.11983	up
F01_cb17255_c3/f1p0/750	105	98	112	11	5	9	13.22	10.34	11.68	1.54	0.83	1.44	2.75845e-06	-3.15234	down
F01_cb1731_c42/f1p0/1907	68	81	42	11	2	16	2.54	2.58	1.31	0.46	0.12	0.74	0.0125946	-2.22018	down
F01_cb17330_c1/f1p0/896	176	258	232	13	4	2	16.25	20.27	17.88	1.32	0.43	0.22	5.65485e-18	-4.66612	down
F01_cb17345_c0/f8p0/891	18	26	5	112	47	55	1.84	2.22	0.45	12.15	5.49	6.51	0.00551517	2.57772	up
F01_cb17373_c27/f8p0/1305	371	610	597	63	55	53	21.73	30.51	29.06	4.1	3.75	3.73	1.55544e-11	-2.67808	down
F01_cb17427_c16/f1p0/1202	254	282	333	72	76	94	16.57	15.67	18.02	5.18	5.82	7.38	0.00757493	-1.31043	down
F01_cb17427_c17/f1p0/1276	965	987	1139	387	327	244	59	51.45	57.85	26.05	23.23	17.84	0.0405463	-1.18119	down
F01_cb17434_c1/f1p0/733	58	61	45	24	0	0	7.62	6.79	5.01	3.59	0	0	0.0201183	-2.38159	down
F01_cb17472_c15/f3p1/623	107	136	85	226	302	264	18.41	19.66	12.22	42.91	62.7	54.41	2.48271e-05	1.78531	up
F01_cb17484_c18/f7p0/1228	1940	2070	2400	0	0	0	122.77	111.64	126.26	0	0	0	6.95643e-54	#NAME?	down
F01_cb17491_c1/f1p0/1249	122	194	215	471	297	340	7.68	10.45	11.3	32.69	21.8	25.64	0.000215084	1.58482	up
F01_cb17589_c0/f3p0/355	124	69	54	4	0	0	82.15	36.42	29.77	2.89	0	0	0.000337841	-5.58415	down
F01_cb17596_c1/f1p0/751	42	77	91	1	4	6	5.3	8.19	9.65	0.14	0.6	0.91	7.78198e-06	-3.66646	down
F01_cb17596_c2/f1p0/837	23	38	41	1	6	0	2.46	3.44	3.66	0.12	0.76	0	0.00628028	-3.31185	down
F01_cb1780_c15/f3p1/1831	21	21	26	69	57	74	0.82	0.72	0.87	2.98	2.57	3.44	0.00315008	2.08036	up
F01_cb17852_c6/f1p0/771	26	48	47	210	148	163	3.24	5	4.8	28.14	21.35	23.75	4.82802e-09	2.63336	up
F01_cb17908_c2/f1p0/957	0	4	11	38	23	32	0	0.35	0.89	3.86	2.44	3.47	0.0014295	3.23512	up
F01_cb17935_c6/f1p0/1578	340	204	2257	0	0	0	18.86	9.66	104.04	0	0	0	0.0214363	#NAME?	down
F01_cb17958_c1/f1p0/1030	122	70	110	11	27	4	9.76	4.78	7.3	1	2.52	0.43	0.00127355	-2.33573	down
F01_cb17958_c6/f2p0/943	57	32	58	0	7	8	5.2	2.49	4.37	0	0.78	0.91	0.00456184	-2.72293	down
F01_cb18021_c0/f2p0/1082	43	49	87	126	120	97	3.21	3.11	5.42	10.36	10.51	8.67	0.0127669	1.47825	up
F01_cb18023_c0/f6p0/1375	14	38	46	258	138	406	0.77	1.8	2.1	15.61	8.82	26.7	0.00839358	3.59936	up
F01_cb18023_c2/f2p2/1404	13	32	35	225	191	520	0.69	1.46	1.55	13.25	11.84	33.26	0.0191706	4.12173	up
F01_cb18023_c3/f1p0/1459	8	27	41	137	133	268	0.41	1.18	1.74	7.7	7.85	16.4	0.00301671	3.41384	up
F01_cb18047_c3/f1p0/1581	144	254	637	1401	1109	1289	6.83	10.29	25.05	73.02	60.7	72.98	7.38433e-07	2.44885	up
F01_cb18078_c2/f1p0/842	143	102	113	24	26	24	14.82	8.91	9.78	2.81	3.22	2.98	0.00695892	-1.76979	down
F01_cb1807_c6/f1p0/3114	57	61	47	17	6	0	1.22	1.13	0.84	0.41	0.16	0	0.0149112	-2.40897	down
F01_cb1810_c2/f1p0/3479	85	78	80	12	5	27	1.61	1.27	1.26	0.26	0.11	0.61	0.0152464	-1.93408	down
F01_cb1813_c44/f1p0/2097	231	220	401	0	0	0	7.87	6.41	11.3	0	0	0	4.75004e-25	#NAME?	down
F01_cb18142_c2/f1p1/548	35	45	40	142	100	145	7.65	8.17	7.29	34.18	26.69	37.87	9.83727e-06	2.20648	up
F01_cb18178_c0/f3p1/871	244	236	324	83	90	55	24.68	20.21	27.27	9.24	10.77	6.64	0.0113704	-1.29853	down
F01_cb18178_c4/f1p0/774	34	72	94	5	0	2	4.14	7.2	9.34	0.72	0	0.34	7.14035e-06	-4.34008	down
F01_cb18184_c2/f1p0/718	11	12	7	22	33	45	1.61	1.48	0.84	3.51	5.72	7.79	0.0261031	2.25557	up
F01_cb18199_c4/f1p1/1495	129	196	155	6	13	16	6.55	8.48	6.54	0.34	0.77	0.99	3.29958e-09	-3.22736	down
F01_cb18243_c1/f1p0/451	21	22	38	73	76	78	7.34	6.02	10.6	26.88	32.13	31.27	0.00233157	2.03086	up
F01_cb18249_c86/f1p0/1593	164	81	52	0	0	0	8.5	3.62	2.27	0	0	0	0.000250111	#NAME?	down
F01_cb182_c0/f1p0/4347	18	24	35	4	0	2	0.27	0.32	0.44	0.07	0	0.04	0.0366303	-3.18726	down
F01_cb18307_c5/f1p0/1212	19	0	0	92	27	82	1.31	0	0	6.64	2.12	6.44	0.00233307	3.77577	up
F01_cb18307_c7/f1p0/1202	10	41	37	99	71	142	0.7	2.31	2.05	7.22	5.52	11.22	0.00441772	2.38913	up
F01_cb18307_c9/f1p0/1276	20	23	45	74	48	105	1.33	1.31	2.54	5.49	3.73	8.45	0.0485285	1.92497	up
F01_cb18343_c0/f3p0/1435	5	21	10	121	60	116	0.27	0.93	0.47	6.98	3.64	7.22	2.64914e-07	3.57038	up
F01_cb18426_c7/f1p1/1124	442	596	749	143	118	289	31.33	35.94	44.1	11.19	9.75	24.51	0.0337721	-1.14484	down
F01_cb1842_c2/f1p0/3982	395	224	369	26	0	18	6.62	3.22	5.14	0.48	0	0.36	3.40081e-09	-4.01316	down
F01_cb1842_c4/f1p1/4898	182	73	159	5	5	3	2.39	0.82	1.74	0.08	0.08	0.06	5.34279e-05	-4.49781	down
F01_cb18439_c1/f1p0/870	387	237	265	0	0	0	39.12	20.29	22.29	0	0	0	4.78042e-17	#NAME?	down
F01_cb1848_c11/f1p2/2908	28	0	31	124	50	55	0.65	0	0.61	3.18	1.35	1.52	0.0366772	2.44182	up
F01_cb1848_c28/f1p0/3331	25	13	69	194	128	149	0.52	0.24	1.18	4.4	3.03	3.68	1.01035e-08	2.69417	up
F01_cb18538_c3/f1p0/1239	1	8	5	45	15	53	0.06	0.43	0.26	3.07	1.08	3.94	0.0149562	3.56261	up
F01_cb18554_c2/f1p1/693	1104	1552	1500	128	565	113	158.54	187.42	179.37	20.27	96.75	19.55	0.000510937	-1.8209	down
F01_cb18579_c0/f8p0/769	21	15	28	96	87	213	2.55	1.54	2.91	12.86	12.53	31.09	0.0465476	3.17866	up
F01_cb18581_c0/f9p0/773	1245	1476	1405	378	317	371	150.25	150.34	141.1	50.27	45.38	53.55	0.00870741	-1.43505	down
F01_cb18581_c5/f1p0/791	178	164	133	30	30	32	20.77	16.16	12.96	3.93	4.14	4.57	0.000804415	-1.86407	down
F01_cb18592_c1/f11p0/519	487	624	612	184	81	132	119.01	126.06	124.65	49.58	24.5	38.64	0.000193658	-1.61228	down
F01_cb18592_c4/f3p0/654	676	790	778	76	54	34	107.03	104.89	102.59	13.3	10.3	6.59	3.0166e-16	-3.27729	down
F01_cb18592_c5/f3p0/559	853	1007	1190	401	302	191	179.49	176.17	208.72	93.05	77.56	48.09	0.0199202	-1.2626	down
F01_cb18609_c3/f1p0/725	544	638	665	91	114	49	77	76.05	78.35	14.19	19.3	8.32	3.97902e-09	-2.3478	down
F01_cb18619_c12/f10p2/870	56	166	55	0	0	0	5.76	14.21	4.65	0	0	0	0.000535093	#NAME?	down
F01_cb18622_c3/f1p0/1497	73	141	130	190	143	199	3.69	6.04	5.4	10.45	8.3	11.91	0.0401138	1.16417	up
F01_cb18632_c5/f1p0/972	141	338	234	555	349	377	13.39	27.23	18.52	58.11	38.94	42.91	0.00280733	1.36203	up
F01_cb18635_c12/f1p0/781	519	562	775	4221	1661	2446	61.75	56.46	76.74	553.13	233.87	348.04	0.00138016	2.67157	up
F01_cb18641_c1/f1p0/1011	120	133	134	445	453	453	9.86	9.25	9.15	40.15	43.41	44.36	4.96744e-09	2.32386	up
F01_cb1869_c17/f1p0/3196	21	15	18	47	54	86	0.46	0.28	0.34	1.12	1.35	2.22	0.004357	2.31582	up
F01_cb18707_c1/f2p1/1056	2395	2516	2401	5	0	0	184.81	165.09	154.04	0.45	0	0	7.45858e-47	-10.1129	down
F01_cb18707_c12/f18p1/1037	170	171	155	19	48	28	13.5	11.51	10.21	1.72	4.48	2.7	0.000554918	-1.85564	down
F01_cb18707_c3/f1p1/1181	801	1036	934	263	184	230	53.32	58.75	51.67	19.29	14.26	18.39	0.0011093	-1.51964	down
F01_cb18775_c1/f1p0/674	3	0	3	82	53	22	0.45	0	0.39	13.58	9.52	4.02	0.000156745	5.18725	up
F01_cb18784_c2/f1p0/1205	61	64	65	147	116	147	3.97	3.58	3.52	10.56	8.81	11.45	0.00159247	1.62448	up
F01_cb18789_c19/f1p0/548	413	349	275	123	28	18	99.66	69.69	55.45	32.81	8.55	5.35	0.00284644	-2.18715	down
F01_cb18828_c3/f1p0/743	73	121	103	194	161	212	9.38	13.07	10.98	27.47	24.49	32.55	0.0026105	1.46164	up
F01_cb18841_c25/f1p0/2622	1220	1283	1339	275	274	241	35.07	31.61	31.96	8.72	9.09	8.32	0.000206231	-1.7663	down
F01_cb1891_c0/f12p2/2533	2	4	26	240	198	260	0.07	0.1	0.6	7.08	6.1	8.35	2.78736e-26	5.06184	up
F01_cb1891_c25/f1p1/1521	142	182	210	50	14	0	6.85	7.52	8.44	2.66	0.82	0	9.27746e-07	-2.60891	down
F01_cb18960_c1/f1p0/1066	121	137	154	43	22	45	9.27	8.91	9.76	3.67	1.99	4.14	0.0400649	-1.38536	down
F01_cb18960_c2/f1p0/915	533	576	719	209	177	174	50.12	45.99	56.24	21.72	19.54	19.57	0.0174394	-1.1854	down
F01_cb18989_c7/f1p0/1257	52	122	161	171	164	186	3.43	6.82	8.8	12.35	12.51	14.6	0.0387044	1.19686	up
F01_cb19085_c0/f1p0/812	41	38	47	0	0	0	4.61	3.62	4.4	0	0	0	2.64914e-07	#NAME?	down
F01_cb19085_c3/f1p0/854	21	49	37	2	3	4	2.18	4.31	3.2	0.23	0.37	0.5	0.0104465	-3.01613	down
F01_cb19103_c0/f3p0/736	30	21	33	57	73	68	4.01	2.35	3.59	8.31	11.42	10.73	0.0189528	1.76295	up
F01_cb19130_c2/f2p0/833	287	222	292	70	133	49	30.96	20.25	26.26	8.39	16.94	6.42	0.0401421	-1.15031	down
F01_cb19160_c15/f1p0/1023	115	99	70	33	9	5	9.26	6.78	4.75	2.93	0.85	0.48	0.00984502	-2.16429	down
F01_cb1922_c25/f1p0/2389	290	290	396	40	28	21	8.26	7.07	9.37	1.27	0.95	0.73	7.47145e-12	-2.94687	down
F01_cb19233_c2/f1p0/554	99	108	81	25	17	24	23.31	21.08	15.91	6.48	4.92	6.75	0.0405977	-1.62408	down
F01_cb1927_c0/f1p0/3619	0	1	0	15	18	17	0	0.02	0	0.3	0.37	0.37	0.000246727	6.16783	up
F01_cb19293_c3/f1p0/1318	70	118	55	24	0	0	4.1	5.83	2.69	1.58	0	0	0.0151429	-2.94589	down
F01_cb19326_c1/f1p1/1207	18	20	34	0	0	0	1.19	1.11	1.83	0	0	0	0.000281821	#NAME?	down
F01_cb19332_c0/f3p0/833	144	340	382	621	605	719	15.54	31.03	34.3	73.73	76.88	92.76	0.000144068	1.72224	up
F01_cb19339_c7/f1p1/1096	59	65	44	173	146	154	4.39	4.06	2.74	14	12.55	13.52	1.65118e-05	1.99188	up
F01_cb19344_c2/f1p0/705	31	67	34	179	105	103	4.33	7.87	4.01	27.57	17.54	17.34	3.77934e-05	2.04918	up
F01_cb19390_c0/f1p0/906	46	89	41	127	89	94	4.39	7.21	3.31	13.38	10.06	10.76	0.0401294	1.31657	up
F01_cb19411_c4/f1p0/1546	55	73	60	0	0	0	2.64	3	2.4	0	0	0	2.21537e-10	#NAME?	down
F01_cb19441_c1/f1p0/1098	10	12	29	64	33	75	0.74	0.75	1.78	5.16	2.86	6.65	0.00936896	2.31574	up
F01_cb19461_c3/f1p0/906	80	86	160	0	0	0	8.59	7.79	14.3	0	0	0	1.40321e-14	#NAME?	down
F01_cb19461_c8/f1p1/692	347	305	583	0	0	0	49.14	36.32	68.8	0	0	0	4.53434e-26	#NAME?	down
F01_cb19471_c1/f2p0/1291	175	274	165	44	47	39	10.44	13.9	8.19	2.88	3.24	2.77	0.00192675	-1.72837	down
F01_cb19471_c2/f1p0/1361	242	227	188	62	66	52	13.44	10.76	8.68	3.79	4.25	3.46	0.0112202	-1.36702	down
F01_cb19471_c6/f8p0/1493	486	602	506	139	140	75	24.09	25.51	20.83	7.59	8.03	4.45	9.69988e-05	-1.66739	down
F01_cb19496_c383/f1p0/936	24	35	11	262	69	194	2.19	2.76	0.86	26.19	7.39	21.08	0.00714992	3.37579	up
F01_cb19496_c634/f1p4/6117	59	2531	4360	0	0	0	0.63	23.17	38.54	0	0	0	0.00011443	#NAME?	down
F01_cb19496_c640/f1p1/6080	18	54	35	0	0	0	0.21	0.53	0.33	0	0	0	3.86896e-05	#NAME?	down
F01_cb19496_c660/f1p9/4502	19	32	32	0	0	0	0.28	0.4	0.39	0	0	0	6.23661e-05	#NAME?	down
F01_cb19502_c4/f1p0/782	963	707	1402	229	341	204	129.05	79.88	156.43	33.85	54.41	32.77	0.00697988	-1.45305	down
F01_cb19506_c0/f1p0/342	340	194	177	34	1	5	253.79	115.4	110.45	28.05	1.03	5.32	0.00121957	-3.7523	down
F01_cb19506_c2/f2p0/300	59	46	27	8	0	0	74.86	46.19	28.93	11.26	0	0	0.00311739	-3.67454	down
F01_cb19506_c3/f1p0/645	698	777	675	215	31	26	113.1	105.55	91.08	38.38	6.18	5.2	7.3506e-10	-2.54646	down
F01_cb19506_c4/f1p0/457	452	369	323	55	4	4	147.42	98.38	87.74	19.86	1.64	1.68	7.25887e-11	-3.77387	down
F01_cb1953_c8/f1p0/3126	63	68	86	133	182	179	1.36	1.25	1.53	3.14	4.47	4.58	0.000328699	1.72575	up
F01_cb19565_c0/f1p0/440	27	10	43	64	69	111	9.66	2.92	12.82	25.18	31.38	47.63	0.00907968	2.16348	up
F01_cb19565_c2/f1p0/570	7	9	16	45	22	47	1.42	1.52	2.7	10.04	5.41	11.38	0.0110223	2.37861	up
F01_cb19565_c4/f1p0/528	27	20	27	107	52	140	6.88	4.22	5.83	29.6	16.24	42.08	0.020576	2.5305	up
F01_cb1959_c11/f1p0/2101	148	147	160	258	215	230	4.92	4.17	4.42	9.43	8.24	9.16	0.0283245	1.14071	up
F01_cb1963_c11/f1p0/1663	70	68	111	257	296	234	3.06	2.57	4.04	12.39	14.97	12.27	1.2557e-07	2.19591	up
F01_cb19646_c2/f1p0/1348	175	159	240	49	44	39	9.86	7.65	11.26	3.09	2.92	2.68	0.0025935	-1.59816	down
F01_cb19652_c1/f2p0/960	471	497	656	297	115	92	41.48	37.09	47.96	28.84	11.89	9.67	0.0202636	-1.20198	down
F01_cb19652_c2/f1p1/910	515	540	647	225	107	55	48.05	42.76	50.26	23.16	11.74	6.24	0.000155945	-1.65586	down
F01_cb19662_c5/f1p0/979	0	14	16	40	31	73	0	1.03	1.15	3.83	3.19	7.47	0.0383717	2.8646	up
F01_cb19682_c1545/f1p0/520	91	150	131	13	4	13	22.42	30.61	27	3.67	1.3	3.98	4.65707e-07	-3.11371	down
F01_cb19682_c1556/f1p0/747	6050	8709	6770	716	667	317	1040.88	1254.23	970.58	135.83	138.19	65.39	0.00166463	-3.16149	down
F01_cb19682_c1775/f1p0/793	1272	1624	1030	366	296	214	147.64	159.19	99.48	46.82	40.67	29.74	0.000867876	-1.67251	down
F01_cb19682_c397/f4p0/785	281	273	289	89	95	45	33.19	27.18	28.37	11.61	13.34	6.44	0.00575942	-1.37747	down
F01_cb19682_c623/f1p0/681	876	764	872	116	54	69	165.94	120.68	137.54	24.18	12.44	15.61	5.9025e-13	-2.9033	down
F01_cb19682_c927/f1p3/1039	22	0	73	154	138	278	1.75	0	4.8	13.45	12.74	26.27	0.00394596	3.18437	up
F01_cb19682_c932/f1p0/1081	58	43	105	168	138	245	5.52	3.54	8.33	17.63	15.48	27.89	0.00558018	1.97183	up
F01_cb19714_c12/f5p0/940	11	10	7	24	28	37	1.08	0.8	0.56	2.41	3.02	4.02	0.0496397	2.17709	up
F01_cb19714_c6/f1p0/967	216	200	273	600	448	703	18.7	14.71	19.6	57.07	45.34	72.63	1.00219e-05	1.87219	up
F01_cb19714_c8/f1p1/1036	233	220	268	459	382	664	18.42	14.79	17.62	40	35.29	62.8	0.0125949	1.59083	up
F01_cb19717_c1/f1p0/630	148	114	208	25	27	30	25.1	16.19	29.36	4.77	5.48	6.05	0.000292095	-1.98262	down
F01_cb19787_c3/f1p0/682	11	20	11	76	50	62	1.62	2.52	1.42	12.46	8.81	11.02	0.000125463	2.66748	up
F01_cb19800_c3/f1p1/1460	45	47	40	5	9	1	2.32	2.07	1.7	0.28	0.55	0.1	0.0132969	-2.63763	down
F01_cb19808_c43/f1p0/776	119	171	157	0	73	0	15.75	19.03	17.29	0	11.55	0	0.0341578	-2.05274	down
F01_cb1984_c10/f2p3/2954	194	206	284	48	104	37	4.39	3.99	5.32	1.21	2.71	1.01	0.0120117	-1.31744	down
F01_cb19861_c3/f1p0/1205	45	61	58	2	12	11	2.92	3.37	3.13	0.14	0.91	0.85	0.0242596	-2.14805	down
F01_cb19869_c1/f1p0/1078	140	154	112	262	200	210	10.83	10.09	7.2	22.28	18.08	19.36	0.0126791	1.22406	up
F01_cb19941_c0/f2p0/1039	18	5	23	59	64	91	1.42	0.34	1.51	5.12	5.9	8.58	2.84289e-05	2.75736	up
F01_cb19974_c2/f1p0/621	0	8	0	28	29	62	0	1.14	0	5.25	6.02	12.61	0.0025556	4.43488	up
F01_cb20054_c1/f1p0/749	116	126	119	1	5	1	14.81	13.47	12.59	0.17	0.88	0.18	1.01945e-12	-5.15223	down
F01_cb20071_c2/f1p0/1225	15	530	238	1665	791	1658	1	28.68	12.6	116.43	58.46	125.97	0.00018051	2.94034	up
F01_cb20078_c14/f1p0/1135	303	347	390	2	8	3	21.25	20.74	22.76	0.17	0.72	0.27	1.58723e-29	-5.77417	down
F01_cb200_c18/f1p0/2180	0	17	20	50	23	41	0	0.49	0.56	1.84	0.88	1.64	0.0253726	2.19704	up
F01_cb20103_c1/f2p0/441	225	565	172	540	453	550	78.66	161.15	50.13	207.73	201.07	230.93	0.0439017	1.18926	up
F01_cb20105_c10/f3p0/1275	8	24	19	313	168	597	0.48	1.23	0.97	20.82	11.77	43.1	0.00657178	4.96031	up
F01_cb20105_c11/f1p1/1228	9	9	41	460	204	679	0.62	0.52	2.17	31.77	14.89	51	0.000473936	5.1	up
F01_cb20105_c5/f1p1/1341	12	23	40	433	230	682	0.69	1.11	1.92	27.03	15.15	46.21	0.000531798	4.73697	up
F01_cb20130_c17/f1p0/466	1	6	4	38	30	26	0.31	1.52	1.03	12.94	11.65	9.63	0.000242275	3.63484	up
F01_cb20148_c4/f1p0/570	418	351	323	139	104	119	83.92	58.66	54.08	30.9	25.36	28.52	0.0471505	-1.09705	down
F01_cb20188_c0/f2p0/857	260	158	287	47	65	43	26.9	13.88	24.72	5.37	7.95	5.33	0.00161987	-1.66397	down
F01_cb20188_c1/f2p0/822	304	175	217	34	47	37	33.41	16.35	19.86	4.16	6.16	4.91	0.00465437	-2.05643	down
F01_cb20202_c0/f1p0/597	78	38	111	139	187	183	14.49	5.9	17.19	28.44	41.99	40.63	0.000360969	1.70754	up
F01_cb20202_c2/f1p0/561	140	191	234	81	50	31	29.35	33.23	40.8	18.68	12.77	7.74	0.03166	-1.29542	down
F01_cb20242_c1/f1p0/889	0	7	1	32	23	14	0	0.58	0.08	3.45	2.65	1.64	0.00205048	3.61903	up
F01_cb20277_c0/f2p0/1359	58	54	90	209	157	189	3.24	2.59	4.18	12.83	10.2	12.63	9.50488e-06	1.98733	up
F01_cb20313_c7/f1p2/1337	400	138	203	688	761	403	22.77	6.73	9.61	43.09	50.23	27.44	0.00437689	1.79121	up
F01_cb20399_c2/f1p0/1306	96	47	28	3	0	0	5.67	2.36	1.4	0.25	0	0	0.021782	-5.48316	down
F01_cb20419_c1/f1p0/1097	11	12	18	42	52	41	0.83	0.78	1.12	3.4	4.45	3.61	0.0087025	2.25837	up
F01_cb20435_c15/f2p0/1429	95	84	107	1	7	3	5	3.79	4.67	0.06	0.42	0.19	1.83478e-08	-4.14788	down
F01_cb20512_c1/f1p0/1554	10	0	16	79	31	48	0.48	0	0.65	4.14	1.69	2.71	0.000528845	3.12096	up
F01_cb20514_c1/f1p0/909	19	42	36	0	0	0	1.86	3.39	2.88	0	0	0	1.04035e-05	#NAME?	down
F01_cb20516_c0/f2p0/720	129	164	147	0	0	0	17.4	18.63	16.51	0	0	0	2.77195e-21	#NAME?	down
F01_cb20521_c4/f1p0/745	161	24	95	292	390	201	20.31	2.55	9.98	40.58	58.36	30.33	0.00332118	2.13623	up
F01_cb20584_c0/f1p0/417	124	56	162	4	16	2	50.69	18.56	55.17	1.8	8.42	0.98	0.00108886	-3.41734	down
F01_cb20700_c0/f1p0/1550	174	143	199	45	53	40	8.24	5.81	7.85	2.38	2.92	2.3	0.0192091	-1.38251	down
F01_cb20714_c2/f1p0/1331	504	284	657	109	66	114	30.25	14.54	32.76	7.2	4.64	8.2	0.0120117	-1.79815	down
F01_cb20855_c2/f1p0/1386	37	25	50	0	0	0	2.03	1.18	2.28	0	0	0	1.51764e-06	#NAME?	down
F01_cb20961_c0/f1p0/785	8	2	2	34	37	25	0.95	0.2	0.2	4.42	5.17	3.51	0.000284484	3.44419	up
F01_cb20961_c1/f1p0/638	81	52	51	267	522	191	13.16	7.14	6.83	47.38	100.74	36.73	0.0408207	2.91003	up
F01_cb21018_c13/f1p0/1382	59	47	127	0	0	0	3.21	2.22	5.76	0	0	0	3.46413e-07	#NAME?	down
F01_cb21018_c14/f1p0/1338	121	181	119	11	27	13	6.91	8.8	5.62	0.72	1.83	0.89	8.9732e-06	-2.51645	down
F01_cb21018_c4/f1p0/893	3	0	0	38	20	29	0.37	0	0	4.09	2.3	3.38	2.56559e-06	5.23084	up
F01_cb2103_c6/f1p1/3601	180	183	221	37	53	32	3.29	2.86	3.35	0.74	1.12	0.71	0.000699266	-1.73355	down
F01_cb21062_c1/f11p2/1000	18	0	11	38	26	45	1.56	0	0.78	3.5	2.61	4.52	0.00967984	2.39261	up
F01_cb2115_c12/f1p0/3345	43	151	88	0	17	0	0.87	2.64	1.49	0	0.4	0	0.0315328	-3.47972	down
F01_cb21184_c10/f1p22/8685	1925	9085	1391	0	0	0	13.85	56.25	8.31	0	0	0	0.000691146	#NAME?	down
F01_cb21184_c36/f1p15/4795	46691	35	35000	10	0	9	622.34	0.41	387.32	0.15	0	0.15	0.00966716	-11.5992	down
F01_cb21294_c11/f1p0/1535	39	35	53	0	1	17	1.9	1.45	2.13	0	0.1	1.01	0.0425081	-2.22009	down
F01_cb21353_c0/f1p0/1062	150	40	217	0	0	0	11.48	2.6	13.81	0	0	0	2.33722e-05	#NAME?	down
F01_cb21393_c0/f1p0/1010	155	123	171	50	14	43	12.75	8.63	11.73	4.58	1.42	4.25	0.0104465	-1.56696	down
F01_cb21398_c1/f1p0/534	114	188	181	44	25	44	26.3	35.87	34.72	11.25	7.19	12.15	0.0066528	-1.56836	down
F01_cb21420_c0/f1p2/743	14	21	0	64	25	57	1.86	2.35	0	9.16	3.96	8.75	0.00718461	2.51248	up
F01_cb21454_c1/f1p0/754	134	87	99	9	21	1	16.8	9.23	10.33	1.24	3.12	0.15	3.96955e-05	-2.87267	down
F01_cb21458_c3/f1p0/1282	24	28	44	136	134	154	1.45	1.43	2.22	9.02	9.36	11.06	3.19331e-08	2.6879	up
F01_cb21492_c3/f1p1/1105	283	357	476	81	49	13	20.76	22.29	29.05	6.59	4.27	1.22	4.212e-09	-2.47044	down
F01_cb21492_c4/f1p1/1094	170	222	377	54	31	32	13.32	14.76	24.55	4.71	2.86	3.02	0.000571188	-2.18741	down
F01_cb21516_c2/f1p0/818	17	17	24	74	52	26	1.96	1.65	2.26	9.02	6.84	3.51	0.0384276	1.89163	up
F01_cb21518_c0/f3p0/531	27	28	10	70	55	38	6.28	5.4	1.94	17.94	15.71	10.57	0.0257129	1.79015	up
F01_cb21518_c1/f1p0/427	5	4	0	48	38	33	1.85	1.21	0	19.55	17.95	14.67	2.4258e-06	4.15725	up
F01_cb21583_c0/f1p0/795	6	11	0	50	81	27	0.69	1.07	0	6.36	11.07	3.73	0.00618544	3.68393	up
F01_cb21595_c1/f1p1/1127	67	71	102	0	0	11	4.69	4.24	5.96	0	0	0.93	7.01568e-07	-3.84196	down
F01_cb21624_c4/f1p1/6130	63	69	60	126	142	104	0.66	0.62	0.52	1.43	1.69	1.29	0.00838743	1.46429	up
F01_cb21629_c0/f1p0/1235	1071	739	714	237	135	105	67.32	39.61	37.28	16.41	9.86	7.9	0.00328005	-1.93574	down
F01_cb21658_c0/f1p0/1089	66	86	76	0	0	0	4.88	5.42	4.67	0	0	0	3.44251e-12	#NAME?	down
F01_cb21675_c1/f1p0/1449	11	45	49	70	70	77	0.59	2.01	2.11	3.99	4.17	4.75	0.0357401	1.61311	up
F01_cb21688_c140/f1p0/444	282	257	231	85	106	40	97.26	72.26	66.32	32.32	46.59	16.87	0.0227621	-1.24192	down
F01_cb21688_c168/f1p0/464	0	0	24	32	54	51	0	0	7.42	12.97	25.13	22.24	0.000174477	3.1783	up
F01_cb21688_c206/f1p0/567	3	2	34	40	62	57	0.78	0.38	5.89	8.98	15.5	13.99	0.000832035	2.66085	up
F01_cb21688_c227/f1p0/587	38	30	155	1	0	0	7.5	5.02	25.47	0.41	0	0	0.0399562	-7.33094	down
F01_cb2172_c41/f1p0/3330	27	0	31	110	46	52	0.61	0	0.57	2.69	1.19	1.4	0.0293397	2.33235	up
F01_cb21732_c1/f1p0/1185	221	237	307	106	75	49	14.64	13.38	16.91	7.73	5.78	3.88	0.0254763	-1.22767	down
F01_cb21769_c2/f1p0/599	63	89	80	0	2	0	11.65	13.59	12.2	0	0.64	0	1.81268e-10	-6.29795	down
F01_cb21813_c0/f1p0/1573	42	68	43	132	86	89	1.98	2.73	1.68	6.79	4.66	4.96	0.0122596	1.50528	up
F01_cb21869_c0/f2p0/841	99	115	137	229	302	247	10.57	10.34	12.11	26.8	37.82	31.39	0.000117651	1.68231	up
F01_cb21956_c1/f2p0/712	21	69	52	4	2	9	2.88	7.99	6	0.61	0.33	1.48	0.0411087	-2.6787	down
F01_cb21956_c3/f1p0/947	130	292	386	41	58	36	11.61	22.2	28.71	4.03	6.07	3.85	0.0217506	-2.02269	down
F01_cb21989_c1/f1p0/1533	37	24	23	1	0	0	1.78	1.02	0.92	0.05	0	0	0.000266496	-6.01313	down
F01_cb22004_c1/f1p0/883	155	82	140	30	33	25	15.31	6.86	11.51	3.26	3.83	2.95	0.0234374	-1.59305	down
F01_cb22009_c47/f1p0/1316	284	159	351	72	64	34	16.93	8.13	17.41	4.74	4.44	2.49	0.0157156	-1.71682	down
F01_cb22095_c2/f1p0/1433	161	124	60	13	11	9	8.39	5.52	2.6	0.75	0.66	0.56	0.0264573	-2.91996	down
F01_cb22096_c2/f1p3/512	172	226	151	441	229	321	43.35	47.03	31.79	122.05	71.07	96.45	0.00433751	1.34571	up
F01_cb22113_c0/f1p0/1391	31	46	20	0	0	0	1.68	2.14	0.92	0	0	0	8.62782e-06	#NAME?	down
F01_cb22147_c1/f1p0/907	23	43	36	78	67	82	2.24	3.48	2.85	8.24	7.58	9.44	0.0167121	1.68576	up
F01_cb22195_c0/f1p0/951	805	653	594	218	119	72	76.18	52.44	46.81	22.8	13.33	8.17	0.000211714	-1.86087	down
F01_cb22221_c0/f1p0/700	74	58	148	14	15	13	10.57	6.89	17.47	2.18	2.61	2.29	0.0236651	-2.18895	down
F01_cb22237_c14/f1p11/8509	34507	13753	17972	6	0	16	253.52	86.95	109.61	0.05	0	0.15	0.000392324	-11.0505	down
F01_cb22237_c8/f1p15/9309	21298	6960	11643	6	0	0	145.36	40.89	65.97	0.05	0	0	4.72857e-10	-12.3303	down
F01_cb22265_c8/f1p2/4885	317	298	388	62	46	32	4.15	3.35	4.21	0.9	0.7	0.5	4.17096e-08	-2.33698	down
F01_cb22300_c3/f1p0/5584	74	77	96	244	207	232	0.86	0.77	0.92	3.1	2.73	3.2	3.16907e-06	1.99047	up
F01_cb22314_c0/f1p0/8202	1308	1313	1595	347	401	429	9.92	8.57	10.04	2.9	3.48	3.9	0.0244653	-1.31044	down
F01_cb22314_c1/f1p0/4366	336	388	465	85	74	76	4.98	4.94	5.72	1.4	1.26	1.36	1.69576e-05	-1.81453	down
F01_cb22337_c0/f1p0/4537	494	213	252	16	5	12	7.01	2.61	2.97	0.26	0.09	0.2	0.0026241	-4.40043	down
F01_cb22349_c0/f1p0/5081	416	385	586	80	113	85	5.25	4.17	6.13	1.12	1.64	1.28	1.63087e-05	-1.78272	down
F01_cb22351_c3/f1p0/5015	4030	735	1849	0	0	0	51.88	8.14	19.76	0	0	0	2.03416e-05	#NAME?	down
F01_cb22369_c1/f1p0/4462	20	16	5	38	40	66	0.3	0.2	0.06	0.61	0.66	1.15	0.00548383	2.29525	up
F01_cb2248_c5/f2p0/3276	58	87	107	1	2	0	1.18	1.52	1.8	0.03	0.05	0	1.54421e-10	-5.86451	down
F01_cb2311_c29/f4p1/2254	79	68	100	19	21	12	2.43	1.8	2.55	0.64	0.77	0.47	0.0414857	-1.73091	down
F01_cb231_c9/f1p0/2948	104	212	161	0	47	0	2.36	4.12	3.04	0	1.24	0	0.00104469	-2.77676	down
F01_cb2331_c0/f2p1/3476	116	98	86	17	26	24	2.21	1.6	1.36	0.36	0.58	0.55	0.0279752	-1.64853	down
F01_cb246_c5/f1p0/3739	159	146	111	31	29	33	2.81	2.2	1.62	0.61	0.59	0.7	0.00701863	-1.66055	down
F01_cb2535_c1/f1p0/3265	226	238	281	0	0	0	4.56	4.12	4.69	0	0	0	2.74424e-32	#NAME?	down
F01_cb2537_c24/f9p2/2284	80	99	106	173	186	209	2.42	2.55	2.66	5.76	6.47	7.54	0.00141432	1.52724	up
F01_cb2545_c9/f1p0/2023	0	21	0	25	35	20	0	0.64	0	0.97	1.42	0.83	0.0315504	2.44837	up
F01_cb2589_c34/f1p0/2633	284	381	438	0	0	0	7.69	8.87	9.85	0	0	0	2.1128e-41	#NAME?	down
F01_cb258_c14/f1p0/3474	129	143	209	0	0	1	2.55	2.43	3.43	0	0	0.03	1.45804e-21	-8.30167	down
F01_cb263_c19/f1p0/1316	6	9	6	36	39	19	0.36	0.45	0.33	2.32	2.64	1.37	0.00739097	2.66543	up
F01_cb2659_c6/f1p0/3368	152	235	182	33	55	17	2.98	3.95	2.97	0.73	1.26	0.41	0.000163237	-1.91958	down
F01_cb2660_c23/f1p0/2312	98	118	158	29	18	10	2.92	3.02	3.91	0.97	0.63	0.38	0.000357003	-2.21001	down
F01_cb2715_c7/f2p0/3020	107	127	187	6	19	10	2.37	2.4	3.43	0.17	0.48	0.28	1.34786e-07	-3.02724	down
F01_cb2729_c22/f1p0/2059	175	258	244	37	51	36	6.11	7.72	7.06	1.42	2.07	1.52	5.00648e-05	-1.91692	down
F01_cb2729_c3/f2p0/1890	243	190	200	0	9	26	9.09	6.11	6.22	0	0.4	1.2	3.52233e-13	-3.60854	down
F01_cb2743_c16/f1p1/2872	152	135	88	4	35	0	3.54	2.7	1.7	0.11	0.95	0	0.00175736	-2.75177	down
F01_cb2743_c4/f1p1/3356	168	122	221	74	21	18	3.3	2.06	3.6	1.61	0.48	0.44	0.0135689	-1.70344	down
F01_cb2747_c17/f1p0/3153	48	24	45	0	0	0	1.02	0.44	0.8	0	0	0	7.35137e-07	#NAME?	down
F01_cb2747_c42/f1p0/1657	160	170	186	36	50	57	7.04	6.39	6.82	1.79	2.56	3.01	0.0268185	-1.31576	down
F01_cb274_c2/f2p1/4215	379	302	342	62	77	65	5.83	3.99	4.37	1.06	1.36	1.2	2.76365e-05	-1.81261	down
F01_cb2779_c6/f1p1/2732	76	35	30	0	0	0	1.87	0.75	0.63	0	0	0	0.000704439	#NAME?	down
F01_cb2783_c18/f2p0/1582	60	85	86	243	220	185	2.8	3.38	3.33	12.41	11.79	10.25	3.02613e-06	2.01	up
F01_cb2783_c8/f1p0/1855	19	17	39	45	91	77	0.75	0.58	1.26	1.93	4.04	3.53	0.0123388	2.07391	up
F01_cb2835_c3/f2p0/2258	139	247	193	431	273	438	4.26	6.47	4.9	14.49	9.59	15.98	0.000600268	1.50302	up
F01_cb2890_c102/f10p2/2837	164	169	182	4	68	0	3.89	3.42	3.59	0.1	1.87	0	0.00021704	-2.29173	down
F01_cb289_c12/f1p0/3330	23	35	20	0	6	0	0.46	0.6	0.33	0	0.14	0	0.030191	-3.15462	down
F01_cb2902_c0/f1p0/3314	59	67	82	12	11	12	1.17	1.14	1.35	0.26	0.25	0.29	0.018474	-2.04295	down
F01_cb2946_c36/f1p0/2916	287	215	304	93	43	98	7.1	4.57	6.24	2.55	1.23	2.9	0.0146268	-1.27321	down
F01_cb2947_c5/f1p0/2684	460	405	433	147	129	140	11.8	8.91	9.22	4.18	3.82	4.3	0.0290409	-1.13247	down
F01_cb2954_c14/f1p0/1971	20	132	53	0	0	0	0.77	4.19	1.64	0	0	0.04	0.0163966	#NAME?	down
F01_cb2986_c4/f1p0/1872	33	43	34	105	128	56	1.26	1.42	1.09	4.38	5.62	2.58	0.0131067	1.90024	up
F01_cb3007_c4/f1p3/3123	73	58	48	93	106	114	1.56	1.07	0.85	2.19	2.61	2.91	0.0419956	1.30923	up
F01_cb3026_c13/f1p0/2756	254	248	415	64	67	93	6.14	5.15	8.33	1.71	1.86	2.7	0.00113454	-1.48595	down
F01_cb3030_c18/f1p0/2851	43	23	46	3	4	5	1.03	0.48	0.92	0.09	0.12	0.17	0.0209737	-2.68972	down
F01_cb3065_c5/f1p0/3345	457	374	565	152	125	153	9.01	6.33	9.25	3.3	2.84	3.61	0.0175532	-1.17644	down
F01_cb3065_c7/f1p0/3578	478	889	699	237	154	268	8.75	13.99	10.64	4.79	3.24	5.89	0.0484927	-1.12011	down
F01_cb30_c2/f1p0/4336	94	97	82	4	8	1	1.41	1.25	1.02	0.07	0.14	0.02	1.71947e-07	-3.88911	down
F01_cb3101_c29/f2p0/1799	249	175	174	54	61	58	9.87	5.96	5.74	2.36	2.82	2.77	0.027827	-1.28796	down
F01_cb3130_c13/f1p0/3078	228	221	240	59	76	45	4.88	4.07	4.28	1.39	1.88	1.18	0.00574945	-1.42186	down
F01_cb3130_c3/f1p0/3263	104	129	140	17	16	15	2.11	2.25	2.37	0.39	0.39	0.38	6.0277e-05	-2.43436	down
F01_cb3132_c32/f1p0/1539	131	116	93	0	0	33	6.28	4.75	3.72	0	0	1.91	9.86511e-05	-2.7929	down
F01_cb3169_c1/f1p0/3252	70	59	75	145	99	127	1.52	1.1	1.36	3.48	2.47	3.31	0.0166499	1.37255	up
F01_cb3175_c3/f1p1/2177	10	14	12	107	90	58	0.34	0.39	0.32	3.74	3.32	2.24	4.68399e-08	3.33021	up
F01_cb3188_c34/f11p0/2542	132	178	135	359	385	330	3.54	4.09	2.99	10.54	11.82	10.54	1.54608e-05	1.78608	up
F01_cb3211_c1/f1p0/3343	185	187	209	3	5	1	3.64	3.16	3.41	0.06	0.11	0.02	1.38978e-19	-5.50077	down
F01_cb3220_c3/f1p1/3192	137	94	144	16	36	21	2.86	1.68	2.48	0.37	0.86	0.54	0.00330817	-1.82943	down
F01_cb322_c4/f1p0/3192	0	4	0	26	28	14	0	0.08	0	0.6	0.67	0.35	0.000184817	4.59437	up
F01_cb3243_c4/f1p0/2152	152	156	142	27	14	68	4.92	4.33	3.82	0.97	0.53	2.64	0.0112607	-1.51039	down
F01_cb3297_c17/f1p0/2603	157	155	217	54	3	58	4.09	3.47	4.69	1.55	0.1	1.82	0.00198149	-1.68557	down
F01_cb3309_c0/f2p0/1144	50	84	61	131	90	136	3.48	4.98	3.56	10.05	7.32	11.3	0.0176789	1.39215	up
F01_cb3315_c67/f1p0/2765	35	23	22	0	6	0	0.86	0.48	0.46	0	0.17	0	0.0240606	-3.20818	down
F01_cb3326_c8/f1p0/3948	299	425	308	920	781	626	5.12	6.25	4.38	17.34	15.32	12.83	0.000250239	1.67796	up
F01_cb3336_c50/f1p0/2853	174	113	184	0	38	0	4.08	2.28	3.6	0	1.04	0	2.27044e-06	-3.07933	down
F01_cb3360_c31/f1p0/2587	115	127	204	44	31	28	3.01	2.86	4.43	1.27	0.95	0.9	0.00845805	-1.58966	down
F01_cb3360_c34/f1p1/2416	534	419	478	165	132	64	15.84	10.64	11.77	5.4	4.53	2.28	0.000899098	-1.50156	down
F01_cb3401_c8/f1p0/1014	37	42	43	0	0	0	3.02	2.91	2.91	0	0	0	4.26141e-07	#NAME?	down
F01_cb3407_c50/f1p0/1808	0	18	15	32	30	51	0	0.64	0.51	1.39	1.4	2.43	0.0143042	2.36422	up
F01_cb3407_c57/f1p0/1721	249	231	299	10	12	16	11.35	9.01	11.29	0.54	0.65	0.88	7.39638e-16	-3.82114	down
F01_cb3453_c6/f1p0/1247	56	27	92	195	275	103	3.51	1.48	4.79	13.34	19.84	7.66	0.0439017	2.24512	up
F01_cb3466_c5/f2p1/2708	83	127	130	245	205	188	2.06	2.72	2.7	6.72	5.88	5.61	0.00248275	1.43238	up
F01_cb3518_c11/f1p1/1258	113	95	126	12	5	16	6.97	4.99	6.45	0.85	0.4	1.24	1.17525e-05	-2.8184	down
F01_cb3559_c14/f1p0/2394	129	212	131	42	44	23	3.7	5.19	3.11	1.33	1.47	0.79	0.00809368	-1.61062	down
F01_cb3568_c14/f1p0/2690	149	96	114	31	21	41	3.64	2.01	2.31	0.84	0.59	1.22	0.0449682	-1.4429	down
F01_cb3588_c3/f1p0/2959	31	40	30	161	166	162	0.73	0.79	0.57	4.06	4.35	4.43	1.1126e-09	2.78988	up
F01_cb3589_c15/f1p0/3038	424	367	414	81	89	84	9.7	7.22	7.87	2.05	2.34	2.32	4.90756e-05	-1.7306	down
F01_cb3603_c18/f1p0/2384	52	32	32	0	0	0	1.52	0.81	0.78	0	0	0	7.43015e-07	#NAME?	down
F01_cb3603_c2/f1p1/3410	37	46	48	14	0	4	0.72	0.77	0.77	0.31	0.01	0.1	0.0352856	-2.40798	down
F01_cb363_c7/f1p0/3920	62	219	191	0	0	0	1.15	3.51	2.96	0	0	0	6.10625e-08	#NAME?	down
F01_cb365_c15/f1p0/2490	23	50	40	12	0	0	0.68	1.28	0.98	0.41	0	0	0.021501	-2.81369	down
F01_cb3663_c0/f35p0/1808	69	103	131	279	284	138	2.73	3.5	4.3	12.12	12.93	6.55	0.00631429	1.73727	up
F01_cb3663_c1/f8p0/1874	60	149	169	481	376	436	2.3	4.84	5.33	20.03	16.41	19.73	7.31819e-09	2.32211	up
F01_cb3663_c12/f1p0/1698	114	369	218	539	589	362	4.85	13.36	7.66	25.11	28.8	18.37	0.00111985	1.61576	up
F01_cb3663_c29/f1p0/1815	88	134	174	389	251	279	3.44	4.52	5.66	16.75	11.33	13.08	3.51193e-05	1.74377	up
F01_cb3663_c4/f1p0/3128	5	15	12	43	29	35	0.13	0.29	0.23	1.01	0.71	0.89	0.0202316	2.27573	up
F01_cb3666_c15/f1p0/2522	28	51	27	11	0	0	0.75	1.19	0.6	0.35	0	0	0.0241868	-2.86774	down
F01_cb3666_c17/f1p0/2852	751	839	791	238	219	121	17.75	17.02	15.51	6.21	5.95	3.45	0.000697028	-1.54148	down
F01_cb3666_c35/f1p0/2482	0	0	0	65	75	59	0	0	0	2.02	2.47	2	8.01698e-17	Inf	up
F01_cb3666_c57/f1p0/2302	0	0	16	51	71	96	0	0	0.41	1.69	2.47	3.45	5.35898e-07	4.43591	up
F01_cb3679_c10/f1p0/2790	623	504	488	238	140	133	15.56	10.81	10.12	6.56	4.04	3.98	0.0243595	-1.1785	down
F01_cb3679_c4/f1p0/2955	281	219	197	78	57	39	6.36	4.25	3.7	1.94	1.48	1.07	0.0045077	-1.524	down
F01_cb3679_c7/f1p1/2799	304	290	281	97	71	69	7.3	5.97	5.59	2.58	1.96	1.99	0.00503656	-1.38571	down
F01_cb3716_c8/f1p0/2788	30	48	49	2	8	5	0.74	1.01	0.99	0.08	0.24	0.16	0.0196438	-2.51832	down
F01_cb3720_c4/f1p0/3337	187	136	182	385	819	659	3.66	2.29	2.96	8.3	18.39	15.44	0.00314443	2.41541	up
F01_cb3738_c14/f4p0/2700	114	108	125	41	34	0	2.86	2.31	2.61	1.13	0.98	0	0.0131638	-1.73541	down
F01_cb3745_c8/f1p0/1892	38	28	21	0	0	0	1.45	0.9	0.67	0	0	0	2.94855e-05	#NAME?	down
F01_cb3767_c12/f1p0/2208	78	99	131	31	24	14	2.43	2.65	3.4	1.1	0.88	0.54	0.0298	-1.64283	down
F01_cb3793_c24/f3p1/2728	215	170	153	402	432	347	5.32	3.61	3.15	10.93	12.24	10.26	9.5208e-05	1.63153	up
F01_cb3819_c8/f1p0/1997	48	55	3	84	80	62	1.69	1.66	0.1	3.26	3.23	2.63	0.0238358	1.54595	up
F01_cb3856_c23/f1p0/2533	329	331	491	31	0	0	8.77	7.58	10.87	0.93	0	0	1.38131e-24	-4.7952	down
F01_cb3875_c13/f1p0/1730	31	32	61	0	12	5	1.29	1.16	2.12	0	0.59	0.29	0.0421661	-2.27434	down
F01_cb3879_c8/f1p1/2191	335	258	346	0	0	0	10.52	6.95	9.02	0	0	0	7.92118e-38	#NAME?	down
F01_cb3894_c53/f1p4/1981	168	268	333	63	73	65	6.06	8.27	9.95	2.53	3.03	2.83	0.00462084	-1.39011	down
F01_cb3909_c2/f2p2/2965	452	400	497	148	159	132	10.16	7.72	9.27	3.67	4.12	3.56	0.0352072	-1.10246	down
F01_cb3909_c6/f1p2/3033	138	168	261	38	32	79	3.03	3.17	4.75	0.93	0.82	2.07	0.0265149	-1.36619	down
F01_cb3920_c9/f1p1/2505	29	47	47	0	13	0	0.79	1.11	1.07	0	0.41	0	0.0137568	-2.67242	down
F01_cb3947_c56/f1p1/1755	460	597	557	981	1029	1118	19.34	21.49	19.45	45.4	49.95	56.27	0.00848652	1.48125	up
F01_cb3979_c4/f1p0/2925	12	0	22	94	28	64	0.29	0	0.43	2.38	0.74	1.76	0.0137565	2.97853	up
F01_cb4004_c35/f1p0/2201	15	42	35	63	49	86	0.5	1.18	0.94	2.26	1.84	3.34	0.0371119	1.65603	up
F01_cb4015_c39/f1p1/2495	21	12	11	61	29	37	0.58	0.28	0.26	1.83	0.93	1.2	0.0252024	1.99121	up
F01_cb4015_c6/f2p0/2625	119	227	206	5	19	16	3.08	5.03	4.41	0.16	0.59	0.5	1.77305e-09	-3.21821	down
F01_cb4025_c4/f1p0/3113	176	184	212	275	340	283	3.85	3.44	3.85	6.61	8.51	7.4	0.0197125	1.1769	up
F01_cb403_c20/f1p0/1876	498	503	640	110	136	131	18.82	16.27	20.07	4.59	5.96	5.94	0.000178572	-1.58942	down
F01_cb4045_c8/f1p1/2883	24	18	9	58	73	48	0.57	0.36	0.18	1.49	1.96	1.34	0.00136127	2.2873	up
F01_cb4050_c0/f1p1/3047	488	1091	857	0	0	0	10.6	20.34	15.45	0	0	0	2.08131e-22	#NAME?	down
F01_cb4050_c2/f1p1/5242	28	72	84	0	0	0	0.35	0.76	0.86	0	0	0	7.02686e-08	#NAME?	down
F01_cb4090_c4/f1p0/2291	75	33	78	143	100	82	2.25	0.85	1.94	4.75	3.48	2.97	0.037247	1.30241	up
F01_cb4105_c113/f1p2/2407	587	1019	982	418	223	150	16.64	24.77	23.12	13.07	7.29	5.1	0.0326163	-1.20901	down
F01_cb4105_c117/f1p0/2408	143	136	73	0	0	7	4.09	3.34	1.73	0	0	0.27	2.34453e-07	-5.09092	down
F01_cb4105_c41/f1p1/2843	61	67	52	16	5	5	1.45	1.36	1.02	0.42	0.15	0.16	0.0126678	-2.32992	down
F01_cb4105_c76/f1p0/2439	197	223	273	67	6	54	5.51	5.36	6.33	2.08	0.2	1.83	4.597e-05	-1.94384	down
F01_cb4105_c92/f1p0/2626	122	122	159	20	34	0	3.16	2.71	3.43	0.57	1.04	0.01	4.70707e-05	-2.39121	down
F01_cb4105_c97/f1p1/2398	419	593	745	237	159	138	12.01	14.56	17.72	7.48	5.24	4.75	0.0158425	-1.19795	down
F01_cb412_c35/f1p0/3985	1833	1314	1835	340	452	366	29.32	18.06	24.38	6	8.29	7.02	0.00434851	-1.58557	down
F01_cb4148_c0/f1p0/3026	91	103	102	137	202	121	2	1.94	1.87	3.32	5.08	3.16	0.0493822	1.15827	up
F01_cb4172_c60/f2p2/2732	75	0	93	256	390	212	1.87	0	1.91	6.95	11.05	6.25	7.56066e-05	2.88111	up
F01_cb4196_c7/f1p1/2969	61	44	33	157	162	157	1.39	0.86	0.64	3.92	4.21	4.27	5.7578e-07	2.27513	up
F01_cb4228_c19/f5p0/2984	180	137	241	32	28	37	4.03	2.63	4.48	0.81	0.74	1.01	8.78713e-05	-1.9933	down
F01_cb4231_c8/f1p0/1901	256	290	302	66	69	80	9.53	9.24	9.32	2.73	2.96	3.57	0.00226203	-1.4525	down
F01_cb426_c2/f2p0/4122	42	46	33	85	76	99	0.66	0.63	0.44	1.48	1.37	1.87	0.0125743	1.61163	up
F01_cb4318_c14/f1p0/1752	11	19	64	93	52	76	0.45	0.7	2.19	4.22	2.46	3.76	0.0122482	1.81045	up
F01_cb4318_c18/f1p0/1790	8	4	0	64	63	89	0.32	0.16	0	2.82	2.92	4.25	4.87808e-11	4.60855	up
F01_cb4318_c19/f1p0/1916	17	28	76	125	125	238	0.66	0.92	2.42	5.21	5.47	10.82	0.0193017	2.60805	up
F01_cb4357_c2/f1p0/3281	48	69	95	115	143	93	1.12	1.39	1.86	2.96	3.83	2.62	0.0492945	1.26962	up
F01_cb4381_c21/f1p0/2050	228	245	294	58	46	90	7.78	7.14	8.33	2.17	1.82	3.69	0.00286265	-1.44729	down
F01_cb4388_c40/f6p1/2745	102	163	111	56	6	0	2.5	3.44	2.26	1.51	0.19	0	0.0260214	-2.18046	down
F01_cb4439_c12/f1p0/2925	206	200	420	33	73	68	4.65	3.87	7.87	0.83	1.91	1.85	0.0341782	-1.67577	down
F01_cb4480_c26/f1p1/2794	0	31	0	96	115	49	0	0.63	0	2.5	3.13	1.4	8.36571e-05	3.57633	up
F01_cb4508_c13/f1p0/2527	0	3	1	29	18	17	0	0.08	0.04	0.92	0.62	0.59	0.000374132	4.53034	up
F01_cb4508_c25/f3p3/2507	0	31	13	46	52	58	0	0.72	0.31	1.38	1.64	1.91	0.00268489	2.38922	up
F01_cb4568_c19/f1p1/1891	279	290	388	34	23	24	10.52	9.34	12.14	1.43	1.01	1.12	1.90362e-12	-3.04698	down
F01_cb4594_c3/f2p1/2449	182	177	220	10	15	19	5.09	4.24	5.09	0.32	0.5	0.66	3.34342e-10	-3.17578	down
F01_cb4594_c4/f2p1/2764	77	72	97	12	14	23	1.89	1.51	1.97	0.34	0.41	0.68	0.0286229	-1.78474	down
F01_cb4596_c16/f1p0/2205	49	232	101	267	271	313	1.55	6.17	2.62	9.15	9.72	11.63	0.000280921	1.6941	up
F01_cb4631_c3/f1p0/2913	526	745	626	143	103	126	12.21	14.83	12.06	3.67	2.74	3.51	9.49412e-06	-1.83551	down
F01_cb4725_c22/f1p0/2349	2319	2075	2014	676	674	294	73.09	56.06	52.74	23.5	24.49	11.12	0.0363785	-1.47137	down
F01_cb4725_c32/f8p1/2141	772	591	682	235	246	146	24.99	16.42	18.36	8.4	9.18	5.69	0.0186613	-1.20663	down
F01_cb4727_c12/f1p0/2223	340	325	545	102	135	132	10.49	8.59	13.95	3.48	4.8	4.89	0.0166546	-1.16749	down
F01_cb4730_c2/f5p0/1673	230	233	267	2	0	0	9.94	8.63	9.58	0.11	0	0	2.53148e-29	-8.10414	down
F01_cb4768_c3/f2p0/2735	73	242	304	0	33	0	1.81	5.12	6.22	0	0.93	0	0.00711577	-3.62936	down
F01_cb4770_c11/f1p1/2391	84	112	88	12	7	18	2.41	2.75	2.09	0.38	0.25	0.64	0.000555395	-2.4162	down
F01_cb4803_c5/f1p0/1874	242	249	233	4	18	13	9.17	8.06	7.31	0.2	0.78	0.63	2.59432e-15	-3.82447	down
F01_cb4821_c28/f3p0/2449	21	27	10	77	47	43	0.59	0.67	0.25	2.38	1.53	1.45	0.0089156	1.9952	up
F01_cb4821_c8/f1p0/2797	228	246	358	75	62	71	5.47	5.07	7.13	2	1.73	2.05	0.00206524	-1.46855	down
F01_cb4837_c6/f1p0/1010	475	544	415	124	120	114	38.96	37.89	28.3	11.24	11.54	11.18	0.000740742	-1.49485	down
F01_cb4866_c11/f6p0/2631	110	206	217	35	17	33	2.84	4.55	4.63	1	0.53	1.02	4.31123e-05	-2.11636	down
F01_cb4888_c5/f2p1/2830	205	155	255	7	4	1	4.86	3.16	5.02	0.19	0.11	0.04	3.45834e-19	-5.20101	down
F01_cb4895_c10/f1p0/2509	41	42	30	96	81	95	1.11	0.99	0.68	2.86	2.54	3.09	0.00348853	1.76741	up
F01_cb4902_c0/f1p0/2861	146	136	159	35	37	23	4.13	3.3	3.74	1.09	1.23	0.78	0.00404673	-1.70485	down
F01_cb4902_c1/f1p0/1788	126	89	92	17	32	11	5.05	3.05	3.05	0.79	1.48	0.57	0.00916748	-1.85348	down
F01_cb4911_c24/f1p0/1491	207	215	232	2	2	0	10.31	9.12	9.58	0.15	0.16	0	4.22913e-25	-6.87066	down
F01_cb4922_c24/f1p1/2155	122	111	98	254	211	136	3.91	3.05	2.6	8.93	7.77	5.22	0.00438531	1.3488	up
F01_cb4922_c29/f1p1/2849	93	59	86	185	179	135	2.21	1.19	1.68	4.8	4.85	3.8	0.00103185	1.57069	up
F01_cb4958_c51/f1p0/2222	125	116	141	28	31	32	3.86	3.08	3.62	0.98	1.11	1.19	0.0189972	-1.54514	down
F01_cb4981_c10/f1p0/1633	414	379	502	0	0	0	18.4	14.42	18.54	0	0	0	5.59902e-45	#NAME?	down
F01_cb4997_c0/f2p1/1810	20	24	26	116	107	54	0.79	0.83	0.88	5.04	4.89	2.56	5.80009e-05	2.4928	up
F01_cb499_c11/f1p0/2936	126	120	118	36	28	30	3.29	2.7	2.56	1.06	0.84	0.94	0.0436766	-1.44906	down
F01_cb499_c30/f3p0/1690	339	294	329	56	37	39	14.5	10.76	11.69	2.67	1.82	2.04	3.57325e-08	-2.36693	down
F01_cb499_c9/f1p0/2757	314	368	442	97	100	101	7.66	7.7	8.95	2.61	2.82	2.97	0.00257125	-1.38421	down
F01_cb5028_c2/f2p2/2228	153	203	182	45	15	17	4.75	5.39	4.69	1.56	0.56	0.66	8.80635e-06	-2.32384	down
F01_cb5030_c19/f1p0/1972	171	112	217	6	55	21	6.34	3.54	6.66	0.27	2.35	0.96	0.00314443	-2.04764	down
F01_cb5035_c4/f1p0/2056	178	255	230	0	21	50	6.49	7.96	6.97	0	0.92	2.18	1.15691e-08	-2.63664	down
F01_cb5067_c14/f1p0/1617	52	44	65	118	120	108	2.36	1.7	2.45	5.85	6.26	5.85	0.00362844	1.62679	up
F01_cb5139_c13/f1p0/1962	57	71	54	7	6	10	2.04	2.14	1.59	0.31	0.27	0.42	0.00529559	-2.46322	down
F01_cb5213_c0/f8p0/1897	110	116	104	390	347	280	4.11	3.71	3.24	16.01	14.95	12.5	9.84497e-08	2.12681	up
F01_cb5226_c12/f8p1/1501	137	94	88	320	380	189	6.77	3.97	3.63	17.35	21.66	11.14	0.00131636	1.96482	up
F01_cb5239_c7/f1p0/2757	62	75	94	202	215	146	1.52	1.59	1.91	5.44	6.02	4.28	6.45128e-05	1.81167	up
F01_cb5276_c8/f1p0/1476	59	45	75	14	0	16	2.96	1.93	3.1	0.81	0	1.01	0.0308875	-2.06276	down
F01_cb5277_c7/f1p0/1541	166	200	201	20	40	65	8.46	8.69	8.5	1.17	2.37	4	0.00151411	-1.62657	down
F01_cb5284_c18/f1p0/2619	71	124	116	289	187	258	1.99	2.95	2.69	8.83	5.99	8.58	4.32557e-05	1.76498	up
F01_cb5293_c105/f1p1/2452	63	80	95	144	199	187	1.75	1.91	2.19	4.41	6.36	6.23	0.000342107	1.69715	up
F01_cb5293_c29/f2p0/2483	0	24	8	41	32	42	0	0.57	0.2	1.25	1.03	1.38	0.0100746	2.39375	up
F01_cb5298_c6/f1p0/2547	381	423	532	232	95	31	10.54	10.04	12.23	7.07	3.04	1.04	0.0178074	-1.42645	down
F01_cb5298_c7/f1p0/3491	290	400	383	75	135	117	6.85	8.1	7.5	1.97	3.67	3.31	0.0176672	-1.17196	down
F01_cb5339_c11/f1p0/2204	626	498	484	18	15	3	19.77	13.47	12.69	0.65	0.56	0.13	3.44665e-22	-5.012	down
F01_cb5339_c12/f1p1/2346	382	195	242	33	50	35	11.15	4.89	5.87	1.06	1.7	1.23	0.0204064	-2.29662	down
F01_cb5339_c16/f1p0/2455	165	136	310	0	5	11	4.91	3.47	7.62	0	0.19	0.4	7.75182e-08	-4.64913	down
F01_cb5339_c4/f1p0/2783	514	518	389	201	116	61	13.2	11.4	8.31	5.68	3.45	1.89	0.00738868	-1.44264	down
F01_cb5342_c2/f1p0/2783	111	127	149	19	23	19	2.98	2.94	3.32	0.59	0.73	0.63	0.000357394	-2.13547	down
F01_cb5346_c3/f1p0/2497	68	87	97	37	15	0	1.87	2.05	2.19	1.14	0.47	0	0.0360984	-1.816	down
F01_cb5360_c44/f1p0/3020	29	19	32	100	139	81	0.66	0.38	0.59	2.45	3.54	2.16	4.09451e-06	2.5191	up
F01_cb5367_c18/f1p0/807	153	129	72	9	17	0	17.95	12.75	7	1.25	2.38	0	0.00113578	-3.29629	down
F01_cb5437_c13/f1p0/2353	37	32	22	67	74	82	1.22	0.91	0.6	2.43	2.8	3.23	0.00809176	1.79271	up
F01_cb5484_c3/f1p1/2069	36	23	35	103	103	65	1.23	0.69	1	3.84	4.02	2.66	0.000559559	2.03007	up
F01_cb5519_c0/f3p0/1897	69	34	86	0	2	0	2.59	1.09	2.69	0	0.12	0	2.64023e-07	-6.00128	down
F01_cb5523_c67/f4p3/2729	14	9	9	34	27	41	0.35	0.21	0.19	0.93	0.79	1.24	0.0309704	2.16924	up
F01_cb5567_c20/f1p0/2568	40	13	22	63	39	70	1.07	0.29	0.49	1.83	1.21	2.22	0.0390796	1.67829	up
F01_cb5604_c1/f1p0/3223	100	117	150	209	216	208	2.05	2.07	2.56	4.73	5.1	5.11	0.00804969	1.3193	up
F01_cb5690_c0/f1p0/2725	26	37	22	53	71	62	0.63	0.77	0.44	1.42	1.98	1.8	0.0411825	1.64606	up
F01_cb5717_c0/f2p0/2729	154	67	117	5	21	4	3.8	1.43	2.4	0.14	0.6	0.14	0.00606034	-2.97771	down
F01_cb5740_c10/f1p0/2456	58	41	25	0	0	0	1.61	0.99	0.58	0	0	0	1.14777e-05	#NAME?	down
F01_cb5740_c3/f2p0/2466	92	87	128	0	0	0	2.56	2.06	2.93	0	0	0	1.63316e-15	#NAME?	down
F01_cb5765_c4/f1p0/2240	277	193	252	0	15	39	8.53	5.1	6.45	0	0.53	1.45	1.79167e-10	-3.16935	down
F01_cb5776_c17/f1p0/1639	52	71	31	11	5	8	2.34	2.7	1.17	0.55	0.3	0.45	0.032961	-2.2022	down
F01_cb5833_c19/f1p0/5290	17	20	35	0	0	2	0.21	0.22	0.36	0	0	0.04	0.00437689	-4.5507	down
F01_cb5895_c19/f3p0/2016	46	50	50	94	195	149	1.6	1.51	1.45	3.62	7.82	6.21	0.00771275	2.12078	up
F01_cb5916_c0/f1p0/2693	23	5	31	65	56	80	0.58	0.12	0.66	1.8	1.63	2.4	0.000863374	2.30335	up
F01_cb5916_c2/f1p0/1968	25	51	6	119	92	143	0.92	1.57	0.19	4.69	3.82	6.13	3.40852e-07	2.59891	up
F01_cb5941_c4/f1p0/2277	33	31	36	0	7	0	1.02	0.83	0.92	0	0.26	0	0.00702789	-3.2826	down
F01_cb5957_c17/f1p0/1728	61	36	45	100	118	97	2.71	1.38	1.67	4.91	6.09	5.21	0.00395398	1.65048	up
F01_cb5957_c4/f1p0/2680	43	27	45	92	78	59	1.1	0.59	0.96	2.57	2.27	1.79	0.0389931	1.49733	up
F01_cb596_c13/f1p0/4113	56	32	51	133	123	75	0.9	0.44	0.68	2.33	2.24	1.43	0.00142188	1.74718	up
F01_cb597_c2/f2p1/3992	79	178	164	14	23	7	1.29	2.5	2.22	0.27	0.44	0.15	0.000104642	-2.72069	down
F01_cb5983_c8/f1p0/1901	36	53	43	112	120	103	1.34	1.69	1.36	4.62	5.18	4.62	0.000629454	1.86465	up
F01_cb6012_c0/f2p0/1361	62	27	70	111	99	96	3.47	1.29	3.24	6.8	6.37	6.37	0.018474	1.45985	up
F01_cb6032_c8/f1p0/1776	34	32	33	0	0	0	1.4	1.11	1.12	0	0.05	0	7.06661e-06	#NAME?	down
F01_cb6034_c4/f3p1/2430	82	97	99	22	23	17	2.31	2.34	2.32	0.69	0.76	0.57	0.0400649	-1.64722	down
F01_cb6048_c6/f1p0/876	6	0	4	18	23	15	0.64	0	0.36	1.99	2.74	1.89	0.0281582	2.97159	up
F01_cb6049_c2/f1p0/2343	73	69	119	180	209	147	2.15	1.75	2.91	5.84	7.08	5.2	0.0010785	1.57314	up
F01_cb6049_c4/f1p0/1395	6	10	3	22	38	22	0.37	0.5	0.15	1.35	2.42	1.47	0.0161128	2.61208	up
F01_cb6051_c15/f1p0/1613	0	26	43	66	67	67	0	1.05	1.67	3.41	3.64	3.76	0.00360115	2.13469	up
F01_cb6070_c9/f1p0/2371	69	30	32	0	0	0	2.01	0.76	0.78	0	0	0	0.000378768	#NAME?	down
F01_cb6075_c9/f1p0/2134	190	168	173	55	56	32	6.15	4.66	4.65	1.97	2.11	1.25	0.0184336	-1.39381	down
F01_cb6091_c6/f19p4/1820	901	485	966	65	156	27	35.22	16.25	31.37	2.8	7.04	1.27	0.000116511	-2.72601	down
F01_cb6095_c0/f1p0/2655	37	51	49	2	4	10	0.95	1.11	1.04	0.07	0.12	0.3	0.0131521	-2.53083	down
F01_cb6115_c0/f2p0/2652	156	195	206	47	57	53	3.99	4.26	4.35	1.32	1.68	1.62	0.0258817	-1.29517	down
F01_cb6115_c1/f1p0/2571	120	123	114	36	23	27	3.18	2.8	2.5	1.06	0.71	0.85	0.0269536	-1.55401	down
F01_cb6171_c7/f1p0/1632	47	45	51	3	1	0	2.15	1.76	1.94	0.15	0.05	0	1.39285e-05	-4.71653	down
F01_cb618_c10/f1p1/3347	287	447	344	114	39	101	5.65	7.56	5.62	2.48	0.9	2.39	0.000430711	-1.57764	down
F01_cb6199_c3/f1p0/2538	9	0	17	54	23	23	0.26	0	0.39	1.62	0.72	0.77	0.0420822	2.46254	up
F01_cb6202_c8/f1p0/2145	0	27	10	39	29	45	0	0.77	0.29	1.41	1.12	1.78	0.0273293	2.16448	up
F01_cb6355_c39/f1p0/2114	103	156	143	0	0	0	3.98	5.14	4.59	0	0	0	1.35434e-19	#NAME?	down
F01_cb6355_c45/f1p1/2250	208	125	141	45	16	24	6.39	3.3	3.6	1.54	0.58	0.88	0.0126506	-2.01402	down
F01_cb6357_c14/f1p1/2188	274	422	423	101	72	101	8.6	11.36	11.04	3.49	2.62	3.82	0.000768861	-1.5012	down
F01_cb6378_c15/f1p0/2471	244	171	218	69	63	41	6.68	4.02	4.95	2.1	2	1.35	0.0125029	-1.37559	down
F01_cb6438_c14/f1p0/1379	87	44	37	0	7	0	4.76	2.08	1.68	0	0.48	0	0.0137938	-4.0736	down
F01_cb644_c48/f1p0/1015	171	209	255	0	0	0	14.03	14.56	17.41	0	0	0	1.39599e-28	#NAME?	down
F01_cb644_c7/f2p0/1326	20	27	29	0	1	1	1.17	1.35	1.39	0	0.09	0.09	0.00266186	-4.66379	down
F01_cb6455_c11/f1p1/2447	136	151	209	359	257	272	3.79	3.62	4.85	11.02	8.25	9.08	0.00301838	1.36281	up
F01_cb6462_c19/f1p0/1475	50	91	92	180	101	147	2.56	3.93	3.88	10.01	5.89	8.87	0.00925963	1.40383	up
F01_cb6520_c4/f1p0/1781	41	75	57	8	7	16	1.66	2.6	1.92	0.4	0.34	0.8	0.0489703	-1.93517	down
F01_cb6525_c3/f2p0/2039	190	268	258	44	39	58	6.54	7.87	7.36	1.67	1.58	2.39	0.000107932	-1.81074	down
F01_cb6531_c15/f4p0/2303	70	87	0	90	137	110	2.11	2.24	0	2.95	4.71	3.93	0.0483099	1.57035	up
F01_cb6553_c1/f3p0/2189	29	46	0	142	85	242	0.92	1.25	0	4.95	3.1	9.18	0.0286508	3.12277	up
F01_cb6562_c6/f1p0/1708	34	28	21	0	0	0	1.44	1.02	0.76	0	0	0	5.15766e-05	#NAME?	down
F01_cb6563_c8/f1p0/2354	133	105	153	26	51	17	3.88	2.63	3.7	0.86	1.73	0.6	0.0189037	-1.53289	down
F01_cb6593_c16/f1p0/2139	105	100	145	16	21	24	3.4	2.78	3.9	0.57	0.78	0.93	0.00189918	-1.97845	down
F01_cb6593_c24/f1p0/1920	0	10	0	52	20	17	0	0.37	0	2.35	0.95	0.87	0.029447	3.63028	up
F01_cb6593_c25/f1p0/1777	41	27	25	5	0	0	1.64	0.95	0.86	0.26	0	0	0.00411543	-3.83871	down
F01_cb659_c18/f1p0/2042	180	339	279	119	62	50	7.42	11.95	9.57	5.41	2.99	2.49	0.0391694	-1.28799	down
F01_cb659_c19/f1p1/3977	388	553	373	159	77	100	6.43	7.86	5.13	2.9	1.48	1.98	0.00129737	-1.47541	down
F01_cb659_c23/f1p3/4417	335	440	336	81	52	54	4.9	5.52	4.08	1.3	0.88	0.96	9.44717e-07	-2.07172	down
F01_cb659_c3/f2p4/4109	349	337	328	87	55	31	5.51	4.57	4.3	1.52	1.01	0.59	1.78415e-06	-2.06989	down
F01_cb6609_c11/f1p0/2420	340	304	360	74	95	118	9.59	7.37	8.45	2.31	3.1	3.99	0.00810136	-1.2756	down
F01_cb6647_c58/f3p1/3872	27	45	66	98	101	94	0.46	0.66	0.93	1.82	1.96	1.9	0.00841094	1.63771	up
F01_cb6672_c7/f1p0/1825	669	543	696	168	223	127	27.69	19.22	23.93	7.66	10.69	6.29	0.00309202	-1.36672	down
F01_cb6680_c26/f1p0/2844	180	192	218	0	12	86	4.25	3.88	4.27	0	0.34	2.44	0.00277772	-1.99932	down
F01_cb6692_c11/f1p0/421	41	153	100	207	170	174	16.14	48.88	32.79	89.57	85.84	82.35	0.00351662	1.44181	up
F01_cb6712_c15/f1p0/1740	3	6	0	21	15	15	0.12	0.21	0	0.95	0.71	0.74	0.0399562	2.96349	up
F01_cb6727_c3/f1p0/2053	83	77	67	143	167	127	2.82	2.26	1.89	5.38	6.57	5.17	0.00501796	1.44987	up
F01_cb6765_c0/f2p0/2541	454	520	614	133	118	228	12.11	11.9	13.6	3.91	3.62	7.28	0.0131521	-1.18773	down
F01_cb676_c3/f2p1/1243	154	225	201	429	409	424	9.64	11.96	10.43	29.44	29.67	31.64	0.000112441	1.64648	up
F01_cb6787_c1/f2p1/2332	192	210	216	2	3	4	5.66	5.3	5.27	0.08	0.11	0.16	8.88292e-21	-5.56144	down
F01_cb6793_c7/f1p0/2518	7	0	2	32	17	15	0.2	0	0.06	0.97	0.52	0.49	0.00654568	3.24396	up
F01_cb679_c8/f1p1/2404	66	51	58	17	13	0	1.89	1.24	1.38	0.56	0.45	0	0.0369644	-2.08297	down
F01_cb6860_c13/f1p0/2544	32	0	34	95	44	53	0.94	0.01	0.82	3.01	1.45	1.82	0.0191984	2.03144	up
F01_cb6874_c4/f4p1/1436	957	493	1109	78	174	93	49.75	21.89	47.91	4.49	10.53	5.82	0.00146647	-2.35612	down
F01_cb688_c13/f1p0/3995	23	21	60	88	65	102	0.46	0.35	0.96	1.88	1.45	2.36	0.00409946	1.85589	up
F01_cb690_c24/f1p0/2242	220	166	442	593	456	341	7.47	4.83	12.47	22.16	17.84	13.85	0.00805357	1.2798	up
F01_cb6917_c14/f1p0/2891	7	22	29	60	34	50	0.19	0.48	0.62	1.66	0.97	1.5	0.0416536	1.8658	up
F01_cb6928_c0/f5p1/1512	634	901	1047	340	246	219	30.97	37.58	42.45	18.3	13.93	12.83	0.0323781	-1.16082	down
F01_cb7022_c1/f1p0/2395	73	88	77	1	8	4	2.09	2.15	1.84	0.03	0.28	0.14	2.4589e-06	-3.64137	down
F01_cb7022_c2/f1p0/4871	107	91	115	146	166	182	1.41	1.04	1.26	2.12	2.51	2.87	0.037055	1.18301	up
F01_cb7044_c7/f1p0/2279	149	198	215	15	45	35	4.54	5.17	5.42	0.51	1.58	1.28	5.51524e-05	-2.00771	down
F01_cb7067_c18/f2p0/1547	166	211	227	0	0	0	7.91	8.56	8.97	0	0	0	1.59827e-27	#NAME?	down
F01_cb7067_c27/f1p0/1571	666	690	714	0	0	0	31.82	28.19	28.35	0	0	0	1.26744e-53	#NAME?	down
F01_cb7069_c7/f1p0/2003	112	135	114	14	19	18	3.92	4.05	3.33	0.57	0.77	0.75	0.000189239	-2.29841	down
F01_cb7073_c12/f1p0/2383	39	39	22	9	0	0	1.12	0.98	0.53	0.3	0	0	0.0171187	-3.09454	down
F01_cb7095_c10/f1p0/1994	32	53	94	0	0	0	1.15	1.64	2.78	0	0	0	2.99568e-07	#NAME?	down
F01_cb7098_c0/f2p0/2482	39	49	42	96	101	106	1.07	1.16	0.96	2.9	3.19	3.5	0.00282506	1.7419	up
F01_cb7128_c9/f1p0/2211	84	95	144	0	0	0	2.65	2.56	3.75	0	0	0	3.84572e-16	#NAME?	down
F01_cb712_c10/f1p1/2495	81	112	83	9	0	11	2.22	2.62	1.89	0.29	0	0.37	4.90869e-06	-3.27917	down
F01_cb7142_c2/f2p0/2483	73	85	98	3	6	10	2	2.02	2.24	0.09	0.19	0.33	1.30491e-05	-3.19209	down
F01_cb7143_c7/f1p0/2038	22	20	42	3	0	0	0.77	0.6	1.22	0.15	0	0	0.00289013	-4.37546	down
F01_cb7143_c9/f1p0/578	94	96	88	3	1	0	18.51	15.74	14.38	0.65	0.24	0	4.40624e-11	-5.68188	down
F01_cb7146_c6/f1p0/1720	157	102	128	38	45	21	6.59	3.66	4.47	1.78	2.21	1.05	0.0484717	-1.40078	down
F01_cb7153_c1/f1p0/2696	119	87	118	1	15	3	2.97	1.87	2.43	0.03	0.44	0.09	1.0888e-07	-3.54423	down
F01_cb7181_c8/f1p0/1742	66	122	103	35	0	25	2.73	4.3	3.53	1.63	0	1.24	0.0202316	-1.77948	down
F01_cb7200_c3/f1p0/2425	91	127	175	228	156	244	2.7	3.21	4.27	7.39	5.31	8.61	0.0211888	1.21691	up
F01_cb7202_c25/f1p0/2492	183	149	171	21	22	11	5.11	3.59	3.99	0.66	0.71	0.37	3.02252e-07	-2.7211	down
F01_cb7202_c9/f1p0/2779	68	120	95	28	22	15	1.82	2.76	2.12	0.82	0.7	0.48	0.0470425	-1.61256	down
F01_cb7223_c18/f1p0/1901	340	435	419	0	0	0	12.62	13.81	12.9	0	0	0	3.13101e-43	#NAME?	down
F01_cb7274_c6/f2p0/1888	0	5	8	38	16	43	0	0.18	0.26	1.57	0.73	1.94	0.00209831	3.49293	up
F01_cb7280_c8/f1p0/1787	21	103	58	106	122	104	0.86	3.58	1.97	4.74	5.71	5.07	0.0232307	1.41156	up
F01_cb7287_c16/f4p0/974	681	788	724	0	4	2	58.69	57.67	51.87	0	0.43	0.22	6.29887e-48	-7.94863	down
F01_cb7287_c18/f1p1/1049	17	128	76	0	4	0	1.39	8.5	4.95	0	0.44	0	0.0462337	-5.20096	down
F01_cb7287_c8/f1p0/1085	558	413	383	165	21	51	45.61	28.71	26.08	14.86	2.05	5	0.00621594	-2.07471	down
F01_cb7293_c9/f1p0/2456	16	9	6	38	40	40	0.46	0.23	0.15	1.17	1.3	1.35	0.00625813	2.40333	up
F01_cb7309_c32/f2p1/1435	60	69	45	129	136	123	3.13	3.07	1.99	7.43	8.2	7.68	0.00137464	1.66045	up
F01_cb731_c11/f1p0/2194	99	54	95	8	15	30	3.24	1.53	2.59	0.3	0.6	1.19	0.043866	-1.67945	down
F01_cb7377_c17/f1p0/2022	57	53	125	0	9	4	1.98	1.57	3.59	0	0.38	0.18	0.000450738	-3.57705	down
F01_cb7390_c20/f1p0/2320	19	41	36	81	108	70	0.57	1.05	0.88	2.67	3.68	2.48	0.0014914	1.97113	up
F01_cb7396_c3/f2p2/2017	0	26	35	109	88	93	0	0.8	1.03	4.18	3.55	3.88	9.4437e-07	2.83481	up
F01_cb7423_c4/f1p0/2306	85	159	147	9	2	2	2.53	4.05	3.65	0.31	0.09	0.1	2.36448e-11	-4.43461	down
F01_cb7435_c17/f1p0/1954	535	464	467	190	86	130	19.54	14.5	14.17	7.68	3.64	5.7	0.00383268	-1.36386	down
F01_cb7435_c18/f1p1/1910	735	688	945	239	284	219	27.16	21.77	29.02	9.75	12.12	9.7	0.0298555	-1.14784	down
F01_cb7453_c7/f1p1/2651	70	103	78	8	6	14	1.98	2.49	1.82	0.25	0.2	0.48	0.000365357	-2.6316	down
F01_cb7468_c14/f1p0/2174	432	237	584	93	94	82	13.76	6.48	15.43	3.29	3.47	3.14	0.0280266	-1.69277	down
F01_cb7468_c5/f1p1/2430	520	234	429	61	102	52	14.59	5.64	9.99	1.9	3.31	1.75	0.0449912	-1.95235	down
F01_cb7468_c6/f1p0/2212	498	310	379	82	111	135	15.55	8.29	9.82	2.85	4	5.06	0.0440136	-1.33925	down
F01_cb7482_c13/f1p0/2462	119	39	365	3	0	0	3.53	1	9.01	0.1	0.01	0	0.0412164	-6.98355	down
F01_cb7503_c2/f1p0/2451	134	142	133	0	0	34	3.75	3.42	3.1	0	0	1.15	1.48929e-07	-3.00216	down
F01_cb7509_c9/f1p0/1844	487	505	600	146	139	125	18.7	16.61	19.14	6.17	6.17	5.74	0.00125683	-1.43754	down
F01_cb7566_c1/f3p0/1102	6	13	21	40	30	42	0.5	0.86	1.29	3.26	2.64	3.72	0.0454853	2.04809	up
F01_cb7573_c0/f4p1/2281	214	199	345	36	96	50	6.46	5.15	8.63	1.22	3.34	1.81	0.00489228	-1.50382	down
F01_cb7589_c83/f1p0/1581	15	50	61	93	70	129	0.75	2.09	2.46	4.93	3.91	7.44	0.0253038	1.78244	up
F01_cb7599_c27/f1p1/2157	597	592	728	138	181	147	19.18	16.31	19.43	4.9	6.7	5.67	0.000514612	-1.51214	down
F01_cb7603_c6/f1p0/2144	169	182	202	24	22	30	5.47	5.06	5.43	0.87	0.84	1.19	3.66327e-06	-2.33577	down
F01_cb7603_c8/f1p0/2314	77	86	86	0	16	5	2.3	2.2	2.12	0	0.56	0.19	4.29098e-05	-3.004	down
F01_cb7642_c18/f1p0/2340	23	71	66	110	78	111	0.72	1.85	1.66	3.66	2.71	4.02	0.0261733	1.44949	up
F01_cb7646_c6/f1p0/1819	0	0	0	20	38	15	0	0	0	0.89	1.73	0.71	1.94046e-05	Inf	up
F01_cb776_c1/f1p0/4077	9	16	24	45	43	42	0.15	0.23	0.33	0.8	0.8	0.81	0.0385633	1.96068	up
F01_cb776_c8/f1p0/5434	25	17	29	54	56	52	0.3	0.18	0.29	0.7	0.75	0.73	0.0489007	1.71122	up
F01_cb7775_c15/f1p0/1806	189	191	262	79	61	42	8.25	7.11	9.48	3.83	3.11	2.23	0.0192386	-1.30776	down
F01_cb7782_c10/f1p0/2551	172	242	188	0	0	3	4.65	5.59	4.22	0	0	0.1	3.30848e-24	-7.05819	down
F01_cb7824_c5/f1p1/2172	37	20	27	0	0	0	1.18	0.57	0.74	0	0	0	4.60866e-05	#NAME?	down
F01_cb7907_c6/f1p0/2371	0	34	0	55	77	89	0	0.86	0	1.76	2.55	3.07	6.05215e-06	3.23414	up
F01_cb7950_c0/f1p0/2357	145	199	233	0	0	0	4.22	4.95	5.63	0	0	0	1.73547e-26	#NAME?	down
F01_cb7950_c3/f1p0/2193	171	321	328	0	0	0	5.47	8.81	8.73	0	0	0	7.64854e-26	#NAME?	down
F01_cb7950_c4/f1p0/2189	36	66	32	0	0	0	1.16	1.79	0.85	0	0	0	4.41833e-07	#NAME?	down
F01_cb7952_c3/f1p1/1641	0	5	0	30	18	25	0	0.2	0	1.47	0.96	1.34	0.000171668	4.37583	up
F01_cb7978_c4/f2p1/1834	136	338	355	11	18	9	5.3	11.21	11.46	0.48	0.8	0.46	4.47583e-06	-3.89442	down
F01_cb7997_c0/f6p0/1508	108	225	232	362	232	235	5.31	9.42	9.47	19.56	13.15	13.79	0.0447607	1.08028	up
F01_cb7997_c4/f1p0/1837	1	9	0	38	50	65	0.04	0.3	0	1.62	2.23	3.01	4.3109e-08	4.45642	up
F01_cb8020_c10/f1p0/2157	96	95	104	15	16	27	3.34	2.84	3.02	0.58	0.68	1.15	0.0122673	-1.81257	down
F01_cb8057_c40/f1p3/2164	231	174	274	46	56	84	7.44	4.79	7.32	1.63	2.08	3.26	0.0106211	-1.32864	down
F01_cb8077_c21/f1p0/1583	23	23	21	73	56	51	1.06	0.91	0.81	3.75	3.02	2.84	0.0108053	1.9243	up
F01_cb8077_c5/f1p0/2730	8	18	11	78	61	74	0.2	0.38	0.22	2.1	1.73	2.18	3.79697e-06	3.04738	up
F01_cb8079_c52/f1p0/1969	45	33	43	108	62	108	1.64	1.02	1.31	4.31	2.61	4.67	0.00489228	1.70641	up
F01_cb8081_c17/f3p0/2282	116	219	158	44	33	40	3.51	5.66	3.97	1.46	1.16	1.47	0.00691234	-1.55433	down
F01_cb8081_c2/f2p0/2115	271	301	318	81	44	140	8.92	8.48	8.69	2.93	1.69	5.51	0.016646	-1.21473	down
F01_cb8087_c13/f1p0/2268	41	56	65	0	2	0	1.4	1.61	1.84	0	0.09	0	2.07227e-07	-5.77018	down
F01_cb8090_c15/f1p0/2035	40	26	33	78	73	76	1.39	0.77	0.96	3	2.92	3.17	0.0130959	1.70092	up
F01_cb8160_c1/f1p0/2545	401	65	443	0	0	0	11.28	1.59	10.34	0	0	0	1.64903e-05	#NAME?	down
F01_cb816_c53/f4p3/3677	2239	1929	1837	445	467	435	39.8	29.46	27.12	8.72	9.52	9.26	0.00625174	-1.65037	down
F01_cb816_c55/f3p1/3789	1337	1083	1005	285	246	176	23.02	16.02	14.36	5.41	4.86	3.64	0.000129076	-1.78761	down
F01_cb8178_c0/f5p0/2261	24	28	11	82	75	54	0.74	0.75	0.3	2.77	2.65	1.97	0.000734482	2.2216	up
F01_cb8186_c5/f1p1/2422	19	25	26	0	0	0	0.55	0.62	0.61	0	0	0	0.000344912	#NAME?	down
F01_cb822_c107/f1p1/2184	1881	226	3075	0	54	0	61.4	6.34	83.38	0	2.07	0	0.0123531	-6.0057	down
F01_cb8245_c8/f1p0/2258	166	142	191	22	47	36	5.04	3.69	4.8	0.76	1.66	1.31	0.0016859	-1.70939	down
F01_cb8292_c12/f1p0/1846	8	60	60	102	88	137	0.35	2.13	2.08	4.66	4.22	6.81	0.002334	1.92916	up
F01_cb8292_c13/f1p0/1992	43	41	77	148	82	115	1.71	1.41	2.54	6.45	3.73	5.45	0.00378841	1.62772	up
F01_cb8296_c3/f1p1/2444	42	59	75	0	23	0	1.18	1.42	1.75	0	0.75	0	0.00810136	-2.36105	down
F01_cb8311_c17/f1p0/1669	7	3	2	46	36	23	0.31	0.11	0.1	2.21	1.85	1.21	8.93793e-05	3.57053	up
F01_cb831_c39/f1p0/1466	94	111	99	34	11	20	4.73	4.8	4.16	1.89	0.66	1.25	0.0209238	-1.73721	down
F01_cb8326_c18/f5p1/2231	263	266	139	53	40	44	8.15	7.06	3.57	1.81	1.43	1.64	0.0279784	-1.80277	down
F01_cb8342_c1/f6p2/2038	130	279	326	676	385	467	4.46	8.21	9.3	25.52	15.23	19.18	0.000289727	1.58917	up
F01_cb8347_c6/f1p0/1732	35	88	78	6	11	0	1.46	3.14	2.7	0.28	0.53	0	0.000804479	-3.03548	down
F01_cb8349_c32/f1p1/1510	109	128	135	450	274	334	5.33	5.35	5.5	24.27	15.53	19.58	5.07083e-07	2.01789	up
F01_cb8349_c34/f1p0/1456	12	8	7	38	55	33	0.61	0.36	0.3	2.14	3.25	2.07	0.00121738	2.71489	up
[truncated: 1,635 more rows]
