# Supplementary material for: SMRT sequencing of full-length transcriptome and gene expression analysis in two chemical types of Pogostemon cablin (Blanco) Benth
Source: PeerJ. 2022 Feb 22;10:e12940. doi: 10.7717/peerj.12940 (PMC8877398; doi:10.7717/peerj.12940)
Supplement: Supplemental Information 12 [file peerj-10-12940-s012.xlsx]

## Sheet: MVA pathway
Gene NAME	ID	RootPO	StemPO	LeafPO	RootPA	StemPA	LeafPA
HMGS	F01_cb3894_c29/f1p0/1945	75.79	7.53	8.62	60.7	7.54	3.33
HMGS	F01_cb3894_c31/f1p0/1912	40.82	3.36	2.99	27.81	1.21	3.5
HMGS	F01_cb3894_c34/f1p4/1877	513.38	39.7	24.17	251.32	40.8	27.49
HMGS	F01_cb3894_c37/f1p0/1842	366.97	53.22	45.49	226.35	31.98	29.48
HMGS	F01_cb3894_c39/f1p0/1724	205.86	8.51	16.2	113.94	10.35	5.43
HMGS	F01_cb3894_c53/f1p4/1981	418.57	32.9	24.28	219.75	26.05	8.39
HMGS	F01_cb3894_c56/f1p2/1935	76.44	11.48	5.39	52.13	8.56	3.55
HMGS	F01_cb9633_c0/f1p0/2128	275.96	26.18	13.21	125.76	17.04	9.2
HMGS	F02_cb6642_c11/f1p1/1847	193.18	19.15	12.2	189.38	21.37	14.69
HMGR	F01_cb16438_c12680/f2p0/2089	177.37	2.24	1.57	66.54	2.82	3.51
HMGR	F01_cb8168_c6/f1p0/2417	14.45	23.21	1.31	17.12	10.28	2.53
HMGR	F01_cb16438_c14654/f1p1/2279	612.25	65.47	11.96	458	50.84	9.65
HMGR	F01_cb16438_c19663/f1p0/2550	758.67	63.66	10.17	637.71	51.6	5.94
HMGR	F01_cb16438_c39527/f1p0/2294	338.62	57.38	11.94	268.96	21.64	5.41
HMGR	F01_cb16438_c55603/f2p0/2212	308.96	15.12	2.56	202.67	12.33	2.81
HMGR	F01_cb16438_c33463/f1p0/2545	200.15	26.25	6.2	134.21	16.78	2.4
HMGR	F01_cb16438_c41334/f1p1/2178	585.62	41.36	8.62	407.98	30.64	4.72
HMGR	F01_cb16438_c72371/f1p0/2182	282.99	38.55	9.92	147.62	27.15	4.69
MVK	F01_cb11528_c9/f5p0/1495	69.17	36.15	13.64	62.57	24.79	11.1
MVK	F02_cb12259_c0/f5p0/1504	60.68	26.37	14.46	56.74	23.26	16.16
MVK	F02_cb12259_c1/f1p0/1643	57.26	23.39	11.13	48.03	20.36	9
PMK	F01_cb3740_c11/f1p0/2114	53.33	18.49	15.2	35	19.59	10.39
PMK	F02_cb9382_c1/f2p0/2008	18.06	7.11	4.26	12.75	4	2.78
PMK	F02_cb9382_c7/f1p0/1971	21.71	9.53	4.46	16.29	5.76	4.79
PMK	F02_cb9382_c8/f1p0/1871	26.38	13.46	16.3	28.23	15.44	13.36
MVD	F01_cb8417_c28/f1p1/1388	156.84	32.51	11.98	112.32	28.26	9.92
MVD	F01_cb8417_c31/f64p2/1699	74.1	17.41	8.49	60.11	17.49	7.61
MVD	F02_cb10536_c14/f14p2/1571	107.77	22.97	9.36	62.82	15.46	6.94
MVD	F02_cb10536_c15/f4p2/1704	118.99	47.19	14.63	110.52	48.77	13.57
MVD	F02_cb10536_c7/f1p2/1755	21.65	7.65	1.91	59.06	32.33	8.31
MVD	F02_cb10536_c8/f1p0/1570	132.24	30.73	12.73	100.43	29.64	11.93
MVD	F01_cb8417_c13/f1p0/2125	61.19	12.88	5.37	44.45	8.92	3.83
MVD	F01_cb8417_c11/f1p0/2022	72.6	35.77	10.82	36.47	18.57	7.02

## Sheet: MEP pathway
NAME	ID	RootPO	StemPO	LeafPO	RootPA	StemPA	LeafPA
DXS	F01_cb3513_c13/f1p1/2658	3.02	10.64	18.02	1.59	21.51	83.75
DXS	F02_cb885_c9/f4p1/2595	2.3	5.01	43.36	11.38	32.6	256.25
DXS	F01_cb5523_c63/f11p1/2622	7.87	23.02	27.39	5.51	32.59	22.33
DXS	F01_cb5523_c67/f4p3/2729	1.3	1.26	0.75	1.69	1.79	2.96
DXS	F01_cb5523_c7/f8p2/2706	32.75	25.87	61.11	24.74	37.24	61.11
DXS	F02_cb5695_c17/f1p0/2573	3	11.31	14.04	2.49	13.72	10.64
DXS	F02_cb5695_c44/f1p0/2387	1.5	7.25	6.03	1.9	5.85	2.3
DXS	F02_cb5695_c8/f3p1/2673	17.65	36.55	46.82	14.02	48.94	30.52
DXS	F01_cb6227_c4/f1p0/2563	4.83	10.14	14.48	3.95	6.25	6.49
DXR	F01_cb8041_c7/f1p0/2343	14.56	13.93	47.63	16.73	14.97	65.62
DXR	F02_cb11041_c77279/f1p0/1711	20.8	22.61	57.28	30.92	19.53	52.89
DXR	F01_cb8041_c25/f3p1/2059	34.62	25.67	158.04	45.01	26.95	134.29
DXR	F01_cb8041_c6/f2p0/2061	15.12	17.13	66.19	14.85	13.73	70.12
DXR	F02_cb11041_c73894/f5p0/2057	34.39	32.1	110.63	46.07	32.06	106.7
DXR	F02_cb11041_c81338/f4p0/2053	16.38	12.7	53.29	15.4	10.78	46.75
MCT	F01_cb9135_c2/f1p0/1313	6.69	8.91	44.75	6.89	9.5	40.18
MCT	F02_cb13678_c0/f2p0/1164	3.09	9.18	36.8	2.84	11.54	39.38
MCT	F02_cb13678_c2/f1p0/1317	3.51	6.78	31.69	4.79	6.08	28.42
CMK	F02_cb11041_c37228/f3p0/1516	13.37	23.25	46.4	16.53	20.95	42.09
CMK	F02_cb11041_c72793/f6p1/1662	13.5	17.32	35.41	13.06	16.26	29.28
CMK	F02_cb11041_c47165/f1p0/1479	2.51	2.73	3.37	1.35	2.08	4.97
CMK	F02_cb11041_c37693/f2p1/1500	8.53	10.5	21.05	7.68	10.37	18.36
MDS	F01_cb14612_c0/f1p0/864	12.37	25.62	97.03	11.25	29.64	82.74
MDS	F01_cb14174_c0/f2p0/950	39.43	34.82	114.8	30.61	34.92	128.66
MDS	F01_cb14174_c4/f1p0/879	57.43	45.8	106.51	52.23	41.84	115
MDS	F01_cb14174_c3/f1p0/932	42.95	38.85	87.43	42.42	33.88	71.68
MDS	F01_cb14174_c5/f1p0/696	19.23	18.06	36.13	18.5	15.1	39.9
HDS	F01_cb16438_c37187/f1p0/2715	16.53	12.95	67.55	11.69	9.21	73.41
HDS	F01_cb16438_c37815/f2p1/2739	6.55	13.51	22.34	7.76	14.46	40.55
HDS	F01_cb16438_c44119/f1p0/2732	3.28	4.03	9.53	5.91	6.43	15.33
HDS	F01_cb16438_c4503/f3p3/2647	39.53	47.95	147.76	41.16	55.78	135.75
HDS	F01_cb16438_c4577/f1p0/2943	13.35	12.22	48.41	12.28	13.8	43.18
HDS	F01_cb16438_c736/f6p0/2866	4.33	2.98	14.58	2.44	1.82	8.62
HDS	F01_cb16438_c9487/f1p0/2736	19.15	28.87	71.74	25.29	34.82	82.62
HDS	F02_cb11041_c4928/f3p3/2763	10.96	9.7	54.23	9.35	8.49	47.21
HDR	F02_cb7697_c28/f1p0/1703	35.04	13.81	45.49	32.78	8.9	20.2
HDR	F01_cb15591_c2/f1p0/1558	10.07	11.38	16.04	9.66	12.23	21.64
HDR	F01_cb16438_c37446/f1p0/2242	7.94	12.92	3.9	6.79	8.57	5.09
HDR	F01_cb16438_c45811/f3p2/1790	33.94	39.41	58.36	32.29	38.01	83.67
HDR	F02_cb7697_c15/f8p0/1560	14.76	8.85	13.64	7.63	8.35	21.04
HDR	F02_cb7697_c2/f6p0/1568	26.39	45.68	55.17	32.41	43.39	69.51
HDR	F02_cb7697_c13/f1p0/2138	1.25	2.53	3.89	2.53	5.74	3.63
