# Supplementary material for: SMRT sequencing of full-length transcriptome and gene expression analysis in two chemical types of Pogostemon cablin (Blanco) Benth
Source: PeerJ. 2022 Feb 22;10:e12940. doi: 10.7717/peerj.12940 (PMC8877398; doi:10.7717/peerj.12940)
Supplement: Supplemental Information 13 [file peerj-10-12940-s013.xlsx]

## Sheet: Sheet1
ACT		18S	△Ct	2^-△Ct	2^ -△△Ct		HMGS		18s	△Ct	2^-△Ct	2^ -△△Ct		PTS		18s	△Ct	2^-△Ct	2^ -△△Ct
root	20.19	14.38	5.96	0.0160643	1.05373		root	21.79	14.38	7.56	0.00529924	0.885732		root	20.51	14.38	6.28	0.0128686	1.86119
	20.33	13.87	6.1	0.0145786	0.956276			21.56	13.87	7.33	0.00621513	1.03882			22.36	13.87	8.13	0.00356965	0.516279
	20.28	14.43	6.05	0.0150928	0.989999			21.51	14.43	7.28	0.0064343	1.07545			22.09	14.43	7.86	0.00430432	0.622533
		14.23		0.0152452					14.23		0.00598289					14.23		0.00691419
stem	22.28	14.38	7.99	0.00393342	0.25801		stem	23.56	14.38	9.27	0.00161976	0.270733		stem	21.23	14.38	6.94	0.00814426	1.17791
	23.21	14.39	8.92	0.00206449	0.135419			24.25	14.39	9.96	0.00100402	0.167815			21.29	14.39	7	0.0078125	1.12992
	22.26	14.09	7.97	0.00398833	0.261612			23	14.09	8.71	0.00238797	0.399133			20.34	14.09	6.05	0.0150928	2.18287
		14.29							14.29							14.29
leaf	22.72	14.13	8.66	0.00247218	0.162161		leaf	23.22	14.13	9.16	0.0017481	0.292183		leaf	17.67	14.13	3.61	0.0818996	11.8451
	23.27	14.04	9.21	0.00168855	0.110759			23.88	14.04	9.82	0.00110633	0.184916			17.94	14.04	3.88	0.0679209	9.82341
	22.36	14.01	8.3	0.00317286	0.208122			22.59	14.01	8.53	0.00270529	0.452171			17.39	14.01	3.33	0.0994421	14.3823
		14.06							14.06							14.06
MVK							HMGR							PMK
root	23.32	14.38	9.09	0.00183501	0.939374		root	22.98	14.38	8.75	0.00232267	0.767324		root	25.63	14.38	11.4	0.000370048	1.12067
	23.35	13.87	9.12	0.00179724	0.920042			22.39	13.87	8.16	0.00349619	1.15501			26.02	13.87	11.79	0.000282395	0.855219
	23.04	14.43	8.81	0.00222805	1.14058			22.49	14.43	8.26	0.00326206	1.07766			25.76	14.43	11.53	0.000338161	1.02411
		14.23		0.00195343					14.23		0.00302697					14.23		0.000330201
stem	24.65	14.38	10.36	0.000760903	0.389521		stem	24.3	14.38	10.01	0.000969817	0.320391		stem	27.48	14.38	13.19	0.000107008	0.324068
	25.41	14.39	11.12	0.00044931	0.230011			24.53	14.39	10.24	0.0008269	0.273177			28.34	14.39	14.05	5.89561e-05	0.178546
	24.74	14.09	10.45	0.000714886	0.365964			23.57	14.09	9.28	0.00160858	0.531414			27.25	14.09	12.96	0.000125502	0.380078
		14.29							14.29							14.29
leaf	24.4	14.13	10.34	0.000771525	0.394958		leaf	24.49	14.13	10.43	0.000724865	0.239468		leaf	26.54	14.13	12.48	0.000175043	0.530111
	24.85	14.04	10.79	0.000564789	0.289126			24.82	14.04	10.76	0.000576657	0.190506			27.27	14.04	13.21	0.000105534	0.319606
	24.02	14.01	9.96	0.00100402	0.513976			23.6	14.01	9.54	0.0013433	0.443777			26.33	14.01	12.27	0.000202471	0.613173
		14.06							14.06							14.06
MVD
root	21.98	14.38	7.75	0.00464534	1.00212
	21.95	13.87	7.72	0.00474295	1.02317
	22.02	14.43	7.79	0.00451831	0.974713
		14.23		0.00463553
stem	23.26	14.38	8.97	0.00199416	0.430191
	24.16	14.39	9.87	0.00106865	0.230534
	23.17	14.09	8.88	0.00212253	0.457882
		14.29
leaf	22.61	14.13	8.55	0.00266805	0.575564
	23.4	14.04	9.34	0.00154305	0.332874
	22.15	14.01	8.09	0.00367001	0.791713
		14.06
